# Supplementary material for: Reciprocal, methylation-dependent binding of Zfp57 and Gzf1 safeguards Dlk1-Dio3 imprinting during developmental reprogramming
Source: Research Square preprint supplement (doi:10.21203/rs.3.rs-7243168/v1), 2025-09-22
Supplement: Supplementary file 1 [file 1efc057d261c330f88d4d5f3.xlsx]

## Sheet: MM1n2VsUS1n2.gene_summary
id	num	neg|score	neg|p-value	neg|fdr	neg|rank	neg|goodsgrna	neg|lfc	pos|score	pos|p-value	pos|fdr	pos|rank	pos|goodsgrna	pos|lfc
Ttll8	4	0.98538	0.97826	0.995483	18931	0	7.9215	1.1577e-05	4.9132e-05	0.472772	1	4	7.9215
Gzf1	4	0.29123	0.4187	0.945217	7856	1	7.1125	2.6364e-05	0.00012322	0.481683	2	3	7.1125
Ehd2	4	0.041105	0.086201	0.803581	1905	2	-0.42467	2.8816e-05	0.00012682	0.481683	3	2	-0.42467
Socs3	1	0.99996	1	1	19244	0	7.9382	3.602e-05	2.5724e-07	0.00495	4	1	7.9382
Foxn4	4	0.99996	0.99994	1	19243	0	6.5288	4.2517e-05	0.00020553	0.481683	5	4	6.5288
Cidec	4	0.92714	0.90508	0.976781	17838	0	5.4472	4.5984e-05	0.00021479	0.481683	6	3	5.4472
Ube2u	4	0.99994	0.99992	1	19242	0	6.8015	5.8174e-05	0.00023743	0.481683	7	4	6.8015
Sfmbt1	4	0.91153	0.89139	0.97356	17522	0	6.7183	6.3062e-05	0.00024257	0.481683	8	3	6.7183
Oas1d	3	0.99225	0.99131	0.998588	19075	0	8.5802	8.4725e-05	0.00014225	0.481683	9	3	8.5802
Fam196b	4	0.69761	0.69402	0.962274	13557	1	0.28521	8.6445e-05	0.00029865	0.482178	10	1	0.28521
Olfr1447	4	0.91153	0.89139	0.97356	17529	0	4.9171	0.00010524	0.00036193	0.482178	11	3	4.9171
Dap	4	0.99988	0.99984	1	19241	0	6.059	0.00011942	0.00037582	0.482178	12	4	6.059
1700113H08Rik	3	0.065657	0.10737	0.81857	2757	1	1.9122	0.0001945	0.00037222	0.482178	13	2	1.9122
Hoxa9	4	0.61307	0.62779	0.956086	12347	1	3.9317	0.0002017	0.00059859	0.615685	14	3	3.9317
Klhl11	4	0.15991	0.25472	0.918335	5194	1	6.7767	0.00020448	0.00060785	0.615685	15	3	6.7767
Hist1h4i	2	0.86011	0.82665	0.965375	16586	0	6.277	0.00024492	0.00025029	0.481683	16	2	6.277
Sephs1	3	0.99083	0.98985	0.998588	19038	0	8.614	0.00024763	0.00049363	0.59375	17	3	8.614
Tcp10c	3	0.99973	0.99966	0.99992	19240	0	7.7263	0.00026508	0.00057904	0.615685	18	3	7.7263
Apoa1bp	4	0.79832	0.78177	0.963641	15389	0	1.7818	0.00031694	0.00097775	0.712726	19	3	1.7818
Krt27	4	0.63183	0.63826	0.956086	12606	1	5.5843	0.00032394	0.00098958	0.712726	20	3	5.5843
Rab7	4	0.99964	0.99949	0.999806	19239	0	5.0225	0.00035777	0.001076	0.712726	21	4	5.0225
Efemp2	4	0.93889	0.91808	0.978771	18069	0	6.589	0.00037237	0.0011084	0.712726	22	3	6.589
Zfp28	4	0.64244	0.64521	0.959222	12794	1	1.9386	0.00037455	0.0011084	0.712726	23	2	1.9386
Gm6164	2	0.533	0.50609	0.945217	11295	1	5.1987	0.00038898	0.00032695	0.482178	24	1	5.1987
Orm3	4	0.99961	0.99947	0.999806	19238	0	4.7915	0.00039352	0.001163	0.712726	25	4	4.7915
Npepps	4	0.67863	0.67869	0.962274	13298	1	6.767	0.00039501	0.0011635	0.712726	26	3	6.767
Krtcap3	4	0.99959	0.9994	0.999806	19237	0	5.9212	0.00040971	0.0012237	0.712726	27	4	5.9212
C2cd2l	3	0.94635	0.92638	0.980458	18210	0	2.4202	0.00041057	0.0008229	0.712726	28	3	2.4202
Slc1a4	4	0.99959	0.99939	0.999806	19236	0	6.0776	0.00041404	0.0012381	0.712726	29	4	6.0776
Kdm2b	4	0.97414	0.96388	0.992256	18709	0	2.8155	0.00043217	0.0012998	0.713273	30	4	2.8155
Wdr63	3	0.66119	0.63888	0.956086	13045	1	7.4679	0.00044054	0.00086508	0.712726	31	2	7.4679
Lrrc30	4	0.9189	0.89691	0.97356	17678	0	6.2499	0.00045136	0.0013585	0.713273	32	3	6.2499
Fam19a3	4	0.99954	0.99933	0.999806	19235	0	5.3528	0.00045549	0.0013713	0.713273	33	4	5.3528
Cnrip1	3	0.35436	0.41132	0.945217	9068	1	8.2434	0.00047011	0.00088823	0.712726	34	2	8.2434
Ric8	4	0.9995	0.99929	0.999806	19234	0	2.8203	0.00050481	0.0016533	0.749137	35	4	2.8203
Tubb4a	4	0.99949	0.99927	0.999806	19233	0	5.5777	0.00051459	0.0016738	0.749137	36	4	5.5777
Myo1b	4	0.92499	0.89921	0.974182	17796	0	6.833	0.00051573	0.0016738	0.749137	37	3	6.833
Elf3	4	0.99942	0.99924	0.999806	19232	0	6.613	0.00058314	0.0018153	0.774083	38	4	6.613
Dclk2	4	0.22389	0.3413	0.945217	6471	1	2.7854	0.000605	0.0019264	0.774083	39	2	2.7854
Zscan2	3	0.99937	0.99924	0.999806	19231	0	6.5609	0.00062512	0.0012592	0.712726	40	3	6.5609
Vps11	4	0.11293	0.19981	0.876997	4154	1	6.3367	0.00064826	0.0020283	0.774083	41	3	6.3367
Tyrobp	4	0.13733	0.23023	0.906649	4671	2	3.4443	0.00065003	0.0020283	0.774083	42	2	3.4443
Slfn2	4	0.9175	0.89457	0.97356	17655	0	1.6875	0.0006626	0.002054	0.774083	43	3	1.6875
Pitpnm2	4	0.99932	0.99909	0.999806	19230	0	5.1805	0.00067506	0.0021261	0.774083	44	4	5.1805
Reg3g	4	0.99931	0.99907	0.999806	19229	0	4.4651	0.0006931	0.0021435	0.774083	45	4	4.4651
Cggbp1	4	0.9993	0.99907	0.999806	19228	0	5.0995	0.00069903	0.0021842	0.774083	46	4	5.0995
Cend1	3	0.86476	0.83382	0.965924	16686	0	3.6816	0.00071303	0.0014922	0.749137	47	2	3.6816
Rab42	4	0.33284	0.45851	0.945217	8625	1	2.4336	0.0007202	0.0021847	0.774083	48	3	2.4336
Ifna15	3	0.97248	0.96528	0.992256	18681	0	7.8373	0.00074357	0.0015478	0.749137	49	3	7.8373
Vmn1r28	3	0.040987	0.075374	0.803581	1895	1	0.36237	0.00079943	0.0016347	0.749137	50	2	0.36237
Ppp2r1a	1	0.99919	0.99894	0.999806	19227	0	10.317	0.00081405	0.0010611	0.712726	51	1	10.317
Smad7	4	0.99918	0.99894	0.999806	19226	0	3.9853	0.00082408	0.0025814	0.774083	52	4	3.9853
Uhrf1	4	0.99917	0.99894	0.999806	19225	0	3.4777	0.0008266	0.0025814	0.774083	53	4	3.4777
Lpar2	4	0.99914	0.99894	0.999806	19224	0	3.7169	0.0008649	0.0026266	0.774083	54	4	3.7169
Zbtb39	4	0.86917	0.84534	0.967185	16744	0	6.1872	0.00089184	0.0026513	0.774083	55	3	6.1872
Pabpc6	4	0.20969	0.32617	0.945217	6202	2	1.2405	0.000893	0.0026513	0.774083	56	2	1.2405
Dusp27	4	0.9991	0.99891	0.999806	19223	0	3.9435	0.00089851	0.0026518	0.774083	57	4	3.9435
Zbtb26	3	0.99904	0.99886	0.999806	19222	0	7.0864	0.00095526	0.0018904	0.774083	58	3	7.0864
Sync	4	0.99902	0.99885	0.999806	19221	0	4.3394	0.00098043	0.0030367	0.774083	59	4	4.3394
Cyp2j12	4	0.98506	0.97751	0.9952	18920	0	6.0076	0.00098802	0.0030809	0.774083	60	4	6.0076
Gpr174	4	0.6775	0.67727	0.962274	13276	1	6.7607	0.00099925	0.0030809	0.774083	61	3	6.7607
Rnf150	4	0.3033	0.4318	0.945217	8094	1	5.0118	0.001008	0.0030809	0.774083	62	3	5.0118
Slc39a2	4	0.91153	0.89139	0.97356	17551	0	4.2966	0.0010082	0.0030809	0.774083	63	3	4.2966
Spdef	4	0.99898	0.99885	0.999806	19220	0	5.8471	0.001021	0.0030814	0.774083	64	4	5.8471
A630076J17Rik	3	0.14596	0.23445	0.911758	4864	1	7.6896	0.0010354	0.0021631	0.774083	65	2	7.6896
Scgb1b24	4	0.99896	0.99882	0.999806	19219	0	4.0065	0.0010409	0.0032414	0.774083	66	4	4.0065
Mnda	4	0.82963	0.80494	0.963641	16001	0	5.9872	0.0010587	0.0032419	0.774083	67	3	5.9872
Ehf	4	0.99893	0.99879	0.999806	19218	0	5.4875	0.0010665	0.0032677	0.774083	68	4	5.4875
Sgk2	4	0.98445	0.97628	0.994737	18903	0	6.0821	0.001074	0.0032677	0.774083	69	4	6.0821
Olfr1018	2	0.71175	0.67532	0.962274	13764	0	4.3712	0.0010803	0.00099679	0.712726	70	1	4.3712
Mesdc2	4	0.85665	0.83199	0.965375	16566	0	6.6962	0.0010929	0.0032682	0.774083	71	3	6.6962
Galt	4	0.9989	0.99877	0.999806	19217	0	4.839	0.0010981	0.0032913	0.774083	72	4	4.839
Matn2	4	0.97431	0.96423	0.992256	18714	0	5.2851	0.0011233	0.003367	0.774083	73	4	5.2851
Pdcd4	4	0.99888	0.99869	0.999806	19216	0	4.8884	0.0011234	0.003367	0.774083	74	4	4.8884
Efna1	4	0.57002	0.60635	0.956086	11797	1	3.5827	0.0011467	0.0034189	0.774083	75	2	3.5827
Usp10	4	0.53722	0.58737	0.956086	11337	1	-1.6412	0.0011809	0.0036417	0.806475	76	1	-1.6412
Arrb2	4	0.99879	0.99853	0.999806	19215	0	4.4638	0.001208	0.0037369	0.817225	77	4	4.4638
Taar8a	4	0.99877	0.99849	0.999806	19214	0	5.598	0.0012306	0.0039694	0.820209	78	4	5.598
Ifnar2	4	0.08942	0.16631	0.848976	3532	1	0.021451	0.0012385	0.0040028	0.820209	79	2	0.021451
Rpp25l	3	0.97273	0.96596	0.992256	18687	0	7.331	0.001243	0.0025088	0.774083	80	3	7.331
Qrich1	4	0.97853	0.96787	0.992256	18794	0	6.8559	0.0012595	0.0040034	0.820209	81	4	6.8559
Ccdc36	4	0.99871	0.99842	0.999806	19213	0	4.8796	0.0012923	0.0044751	0.820209	82	4	4.8796
Fbxo41	4	0.26242	0.38352	0.945217	7298	2	1.1867	0.0012961	0.0044751	0.820209	83	2	1.1867
Ralgapb	4	0.99869	0.99838	0.999806	19212	0	3.6705	0.0013145	0.0045075	0.820209	84	4	3.6705
Unc80	4	0.82403	0.79809	0.963641	15911	0	7.0077	0.0013159	0.0045075	0.820209	85	3	7.0077
Fat3	4	0.010292	0.023389	0.714107	609	2	-0.68308	0.0013537	0.0045641	0.820209	86	2	-0.68308
Gpr149	4	0.75825	0.74071	0.962274	14629	1	6.8181	0.0013592	0.0045641	0.820209	87	3	6.8181
Stau2	3	0.99863	0.99828	0.999806	19211	0	5.952	0.0013673	0.0030387	0.774083	88	3	5.952
Padi1	3	0.99863	0.99828	0.999806	19210	0	6.2771	0.0013748	0.0030392	0.774083	89	3	6.2771
Iqcg	4	0.99859	0.99825	0.999806	19209	0	5.4197	0.0014105	0.0046897	0.820209	90	4	5.4197
Olfr1242	4	0.49757	0.56206	0.954242	10870	1	3.4099	0.0014112	0.0046897	0.820209	91	3	3.4099
Dmpk	3	0.10289	0.15981	0.848976	3960	2	-2.9659	0.0014473	0.0032003	0.774083	92	1	-2.9659
Etl4	3	0.96191	0.94828	0.98759	18485	0	8.0423	0.0014579	0.0032003	0.774083	93	3	8.0423
Gpx7	4	0.92908	0.90723	0.977582	17874	0	0.94208	0.0014688	0.0047272	0.820209	94	3	0.94208
Wrb	3	0.99804	0.99734	0.999806	19201	0	8.1295	0.0014824	0.0032913	0.774083	95	3	8.1295
Cbln4	3	0.879	0.8496	0.967425	16940	0	7.3355	0.0014843	0.0032913	0.774083	96	3	7.3355
Gng4	3	0.43891	0.46888	0.945217	10206	1	4.8557	0.0014905	0.0032918	0.774083	97	2	4.8557
Use1	4	0.95432	0.94001	0.985375	18350	0	4.8752	0.0014968	0.004827	0.820209	98	4	4.8752
Mgmt	3	0.52736	0.52445	0.945217	11229	1	7.2467	0.0015186	0.0034112	0.774083	99	2	7.2467
Hmx3	4	0.31704	0.44542	0.945217	8330	2	0.49365	0.0015264	0.0049644	0.820209	100	2	0.49365
BC017158	4	0.75566	0.73865	0.962274	14587	1	3.9943	0.0015684	0.0049953	0.820209	101	3	3.9943
Bpifb2	4	0.50732	0.56697	0.955227	10964	1	6.2644	0.001572	0.0049953	0.820209	102	3	6.2644
Gm3336	4	0.10511	0.19389	0.876997	3996	1	5.8634	0.0015766	0.0049953	0.820209	103	3	5.8634
Ptger3	4	0.71229	0.70942	0.962274	13849	1	0.061509	0.0015839	0.0050663	0.820209	104	1	0.061509
Apol7a	4	0.99591	0.99472	0.999271	19158	0	6.3124	0.0015876	0.0050663	0.820209	105	4	6.3124
Rhbdd1	4	0.97194	0.96055	0.991145	18671	0	6.0376	0.0015881	0.0050663	0.820209	106	4	6.0376
Slc3a2	4	0.093095	0.16978	0.848976	3653	1	4.0475	0.0015903	0.0050668	0.820209	107	2	4.0475
Lce3e	4	0.99839	0.99813	0.999806	19208	0	6.1432	0.0016094	0.0051362	0.820209	108	4	6.1432
B3galt6	4	0.99837	0.99813	0.999806	19207	0	4.4171	0.0016294	0.0051362	0.820209	109	4	4.4171
Tnfaip1	4	0.74225	0.73165	0.962274	14315	1	-0.071976	0.0016415	0.0051367	0.820209	110	1	-0.071976
Olfr195	3	0.99228	0.99131	0.998588	19077	0	7.2446	0.0016536	0.0036458	0.806475	111	3	7.2446
Spata45	4	0.99833	0.99813	0.999806	19206	0	5.6249	0.0016676	0.0051367	0.820209	112	4	5.6249
Arhgef37	4	0.93837	0.91744	0.978608	18059	0	5.6072	0.001674	0.0051367	0.820209	113	3	5.6072
Hook2	4	0.18853	0.3039	0.945217	5789	2	-0.69396	0.0016991	0.0052021	0.820209	114	1	-0.69396
Tmem173	4	0.9983	0.99806	0.999806	19205	0	5.0091	0.0017035	0.0052026	0.820209	115	4	5.0091
Eif3d	3	0.99829	0.99785	0.999806	19204	0	5.2595	0.0017056	0.0066755	0.845264	116	3	5.2595
LOC100502896	3	0.90727	0.88342	0.97356	17473	0	1.818	0.0017064	0.0066755	0.845264	117	3	1.818
Tsn	4	0.32699	0.4558	0.945217	8538	1	5.9861	0.0017247	0.0052381	0.820209	118	3	5.9861
Cyp2a12	4	0.74225	0.73165	0.962274	14373	1	4.4967	0.001728	0.0052381	0.820209	119	3	4.4967
Pdlim1	4	0.99612	0.99497	0.999313	19163	0	5.7924	0.0017323	0.0053091	0.820209	120	4	5.7924
Copz1	3	0.74712	0.71841	0.962274	14431	0	7.24	0.0017508	0.006676	0.845264	121	2	7.24
Serpinb11	4	0.99024	0.98583	0.997755	19026	0	4.0862	0.0017566	0.0053816	0.820209	122	4	4.0862
Spata31d1a	3	0.99821	0.99779	0.999806	19203	0	6.2315	0.0017928	0.006728	0.846276	123	3	6.2315
Tmem39b	4	0.42247	0.52506	0.945217	10028	1	3.964	0.0018092	0.0054145	0.820209	124	2	3.964
Olfr352	4	0.60084	0.6229	0.956086	12195	1	0.49102	0.0018142	0.0054145	0.820209	125	2	0.49102
Fgf6	4	0.85665	0.83199	0.965375	16500	0	5.4774	0.0018143	0.0054145	0.820209	126	3	5.4774
Rnf121	3	0.43157	0.46509	0.945217	10125	1	1.0061	0.0018359	0.0067897	0.848496	127	2	1.0061
Cyp2j13	4	0.4209	0.52506	0.945217	10011	1	5.4039	0.0018564	0.0054588	0.820209	128	3	5.4039
Nxnl2	4	0.88304	0.85989	0.97078	17024	0	4.2753	0.0018654	0.0054588	0.820209	129	3	4.2753
Eif4e3	4	0.75882	0.74139	0.962274	14641	1	2.4692	0.0018717	0.0054974	0.820209	130	3	2.4692
Acsm1	4	0.99812	0.99781	0.999806	19202	0	6.534	0.0018765	0.0054979	0.820209	131	4	6.534
Mff	4	0.98065	0.97071	0.993199	18834	0	6.9902	0.0018922	0.0057423	0.825313	132	4	6.9902
Gprc5d	3	0.29725	0.38628	0.945217	7986	1	8.0034	0.0019061	0.0072234	0.891814	133	2	8.0034
Apoc2	4	0.69482	0.69123	0.962274	13524	1	4.0605	0.0019073	0.0057428	0.825313	134	2	4.0605
9830147E19Rik	4	0.99196	0.98908	0.998588	19067	0	5.2302	0.0019314	0.0057845	0.825313	135	4	5.2302
Tnr	4	0.91803	0.89614	0.97356	17664	0	4.6494	0.0019375	0.0058318	0.825313	136	3	4.6494
Il22ra1	4	0.7732	0.75054	0.962274	14899	1	3.6148	0.0019466	0.0058318	0.825313	137	2	3.6148
Lrpprc	4	0.60733	0.62433	0.956086	12312	1	6.1166	0.0019641	0.0058323	0.825313	138	3	6.1166
Ccp110	3	0.28394	0.37949	0.945217	7736	1	6.3385	0.0020086	0.0074935	0.906999	139	2	6.3385
Pqlc3	4	0.99799	0.99772	0.999806	19200	0	5.2445	0.0020125	0.0060756	0.834882	140	4	5.2445
Prss30	4	0.79025	0.77361	0.963641	15230	0	3.8945	0.0020325	0.0061436	0.834882	141	2	3.8945
Ndn	3	0.5485	0.54581	0.945217	11533	1	6.6972	0.0020345	0.0074935	0.906999	142	2	6.6972
Aurkb	1	0.99795	0.99686	0.999806	19199	0	9.983	0.0020531	0.0031365	0.774083	143	1	9.983
Hoxd12	4	0.99793	0.99767	0.999806	19198	0	4.8935	0.0020718	0.0061832	0.834882	144	4	4.8935
Hsd17b12	2	0.9979	0.99823	0.999806	19197	0	8.5607	0.0020953	0.0057819	0.825313	145	2	8.5607
Mlec	4	0.98491	0.97751	0.9952	18914	0	6.0755	0.002099	0.0062176	0.834882	146	4	6.0755
Primpol	4	0.99635	0.99557	0.999366	19171	0	4.9213	0.0021019	0.0062176	0.834882	147	4	4.9213
Tsc1	4	0.99786	0.99754	0.999806	19196	0	3.4137	0.0021426	0.0063766	0.834882	148	4	3.4137
Il2ra	4	0.99783	0.99754	0.999806	19195	0	4.4841	0.0021732	0.0063766	0.834882	149	4	4.4841
Eme2	4	0.9978	0.99754	0.999806	19194	0	5.257	0.0021982	0.0063771	0.834882	150	4	5.257
Creb3l1	4	0.072053	0.13868	0.838017	2965	1	4.6927	0.0022652	0.010362	0.999379	151	3	4.6927
Cyb5d1	3	0.98935	0.98841	0.998588	19005	0	7.8796	0.0022803	0.00792	0.94093	152	3	7.8796
Defa-rs7	3	0.96686	0.95527	0.989319	18573	0	7.7802	0.0022849	0.00792	0.94093	153	3	7.7802
Rad21l	4	0.97074	0.95908	0.990638	18643	0	5.5472	0.0022948	0.010491	0.999379	154	4	5.5472
Pbp2	4	0.9977	0.99745	0.999806	19193	0	6.1846	0.0022976	0.010491	0.999379	155	4	6.1846
Bpnt1	4	0.62013	0.63408	0.956086	12451	1	4.342	0.002298	0.010491	0.999379	156	3	4.342
Tbl1xr1	4	0.88699	0.86928	0.97356	17098	0	3.3435	0.002332	0.010581	0.999379	157	2	3.3435
Slc6a5	4	0.7732	0.75054	0.962274	14913	1	5.5403	0.002361	0.010581	0.999379	158	3	5.5403
Vdac1	2	0.99764	0.99767	0.999806	19192	0	7.3503	0.0023611	0.0063226	0.834882	159	2	7.3503
Prss45	3	0.8917	0.86435	0.97356	17187	0	6.6506	0.0023628	0.0079205	0.94093	160	3	6.6506
Triml1	4	0.96004	0.94545	0.986989	18443	0	5.7608	0.0023644	0.010581	0.999379	161	4	5.7608
Mrpl46	2	0.99758	0.99767	0.999806	19191	0	7.1437	0.0024174	0.0063231	0.834882	162	2	7.1437
Cobl	3	0.99756	0.99709	0.999806	19190	0	6.2812	0.0024413	0.0081428	0.961398	163	3	6.2812
Lep	2	0.40479	0.39612	0.945217	9878	1	3.6273	0.0024622	0.0064301	0.836132	164	1	3.6273
Znrf2	4	0.72199	0.71493	0.962274	14013	1	2.1781	0.0025046	0.011306	0.999379	165	3	2.1781
Fgr	4	0.98502	0.97751	0.9952	18918	0	5.5577	0.002508	0.011306	0.999379	166	4	5.5577
Vmn2r84	3	0.182	0.28589	0.945217	5655	1	7.6177	0.0025126	0.008345	0.979262	167	2	7.6177
1700017D01Rik	4	0.48853	0.55294	0.945217	10746	1	4.6092	0.0025622	0.011361	0.999379	168	3	4.6092
Tnpo1	3	0.050247	0.084284	0.803581	2256	2	-1.7796	0.0025696	0.0084062	0.980468	169	1	-1.7796
Fut7	4	0.99738	0.99706	0.999806	19189	0	3.4803	0.0026166	0.011361	0.999379	170	4	3.4803
Olfr933	4	0.67928	0.67869	0.962274	13314	1	2.4555	0.0026197	0.011361	0.999379	171	3	2.4555
Mlph	4	0.99736	0.99701	0.999806	19188	0	4.5257	0.0026387	0.01141	0.999379	172	4	4.5257
Strap	4	0.99561	0.99456	0.999271	19152	0	4.551	0.0026434	0.01141	0.999379	173	4	4.551
Crabp2	4	0.32203	0.45036	0.945217	8427	1	4.7021	0.0026471	0.011611	0.999379	174	3	4.7021
Slc25a32	4	0.89682	0.88025	0.97356	17287	0	5.9509	0.0026559	0.011611	0.999379	175	3	5.9509
Art3	3	0.99734	0.99667	0.999733	19187	0	4.7015	0.0026574	0.0086917	0.999379	176	3	4.7015
Ccdc159	4	0.99734	0.99701	0.999806	19186	0	3.6605	0.0026609	0.011611	0.999379	177	4	3.6605
Lgmn	4	0.82734	0.80245	0.963641	15967	0	5.623	0.0026924	0.011917	0.999379	178	3	5.623
Grik5	2	0.9055	0.88851	0.97356	17442	0	5.2989	0.0026925	0.0066282	0.845264	179	2	5.2989
Sh3bgrl	3	0.51584	0.51987	0.945217	11096	1	3.1496	0.0026991	0.0086922	0.999379	180	2	3.1496
Tyw3	4	0.95021	0.93421	0.983044	18272	0	4.1452	0.0027206	0.012095	0.999379	181	4	4.1452
Clec4a3	4	0.088338	0.16631	0.848976	3495	2	-0.57162	0.0027347	0.012142	0.999379	182	2	-0.57162
Cldn14	4	0.9941	0.99184	0.998588	19117	0	5.5788	0.0027885	0.012482	0.999379	183	4	5.5788
Rnf122	4	0.24339	0.36706	0.945217	6929	1	-0.48799	0.0027922	0.012482	0.999379	184	2	-0.48799
Tek	4	0.00079686	0.0017816	0.537015	46	3	-3.561	0.0028497	0.012658	0.999379	185	1	-3.561
Rab32	4	0.38435	0.50684	0.945217	9586	1	5.377	0.0028524	0.012658	0.999379	186	3	5.377
Hoxd13	4	0.97137	0.9598	0.990638	18660	0	4.8022	0.0028581	0.012658	0.999379	187	4	4.8022
Olfr433	4	0.99713	0.99657	0.999685	19185	0	3.8025	0.0028675	0.012659	0.999379	188	4	3.8025
Tyr	4	0.048657	0.098223	0.806893	2194	3	-1.0395	0.0029072	0.012807	0.999379	189	1	-1.0395
Cbr1	4	0.99705	0.99651	0.999679	19184	0	3.3694	0.002948	0.012808	0.999379	190	4	3.3694
Aco2	3	0.070461	0.11295	0.820481	2917	1	6.2986	0.0029518	0.0092211	0.999379	191	2	6.2986
Dek	4	0.7638	0.74353	0.962274	14737	1	1.769	0.0029647	0.012855	0.999379	192	2	1.769
Ctse	4	0.22838	0.35652	0.945217	6576	1	5.6753	0.0029737	0.01315	0.999379	193	3	5.6753
Olfr1239	4	0.85665	0.83199	0.965375	16560	0	5.0676	0.0029778	0.01315	0.999379	194	3	5.0676
Tlx1	3	0.14015	0.22403	0.906649	4735	2	-1.5092	0.0030011	0.012164	0.999379	195	1	-1.5092
Setd1b	4	0.91153	0.89139	0.97356	17558	0	5.799	0.003009	0.013205	0.999379	196	3	5.799
Pp2d1	4	0.69565	0.69123	0.962274	13535	1	0.55813	0.0030222	0.013261	0.999379	197	2	0.55813
Insm2	4	0.99694	0.99633	0.999554	19183	0	4.0911	0.0030619	0.013261	0.999379	198	4	4.0911
Spef1	4	0.99693	0.99633	0.999554	19182	0	3.5753	0.0030656	0.013261	0.999379	199	4	3.5753
Pkn2	4	0.99692	0.99633	0.999554	19181	0	2.7502	0.0030822	0.013473	0.999379	200	4	2.7502
Bdnf	4	0.9151	0.89457	0.97356	17599	0	4.0086	0.0030857	0.013473	0.999379	201	3	4.0086
4933417A18Rik	4	0.98436	0.97628	0.994737	18899	0	5.6126	0.0030858	0.013473	0.999379	202	4	5.6126
Sugp2	4	0.85665	0.83199	0.965375	16496	0	5.1842	0.0030895	0.013473	0.999379	203	3	5.1842
Cox10	2	0.31972	0.32902	0.945217	8385	1	4.2372	0.0030953	0.0093034	0.999379	204	1	4.2372
Rbm43	3	0.32213	0.39616	0.945217	8450	1	6.5495	0.0031295	0.012455	0.999379	205	2	6.5495
Olfr320	4	0.99687	0.99621	0.999554	19180	0	4.2861	0.0031334	0.013587	0.999379	206	4	4.2861
Olfr816	4	0.32628	0.45468	0.945217	8489	2	0.25154	0.0031372	0.013587	0.999379	207	2	0.25154
Olfr339	3	0.43891	0.46888	0.945217	10190	1	7.5927	0.0031596	0.012455	0.999379	208	2	7.5927
Tldc1	4	0.98946	0.98421	0.997285	19008	0	6.4058	0.0031667	0.013587	0.999379	209	4	6.4058
Hacl1	4	0.99681	0.99615	0.999554	19179	0	5.9647	0.0031929	0.013728	0.999379	210	4	5.9647
Spinkl	3	0.99681	0.9958	0.999468	19178	0	4.8352	0.0031932	0.012604	0.999379	211	3	4.8352
Lyve1	4	0.16688	0.26689	0.928713	5330	2	-0.89427	0.0031947	0.013728	0.999379	212	1	-0.89427
Thnsl1	4	0.36301	0.48436	0.945217	9201	2	3.1405	0.0032318	0.013729	0.999379	213	2	3.1405
Asb15	4	0.51068	0.56975	0.955875	11017	1	5.2838	0.0032676	0.013852	0.999379	214	3	5.2838
Asxl2	4	0.99672	0.99601	0.999492	19177	0	4.413	0.0032845	0.013936	0.999379	215	4	4.413
5430419D17Rik	4	0.99271	0.99024	0.998588	19082	0	5.3235	0.0032864	0.013936	0.999379	216	4	5.3235
Necap2	4	0.4372	0.5335	0.945217	10182	1	-1.3812	0.0033097	0.013936	0.999379	217	1	-1.3812
Chrnd	4	0.4657	0.54045	0.945217	10506	1	5.3497	0.00331	0.013936	0.999379	218	3	5.3497
Ankrd13c	4	0.77536	0.75261	0.962274	14946	1	3.376	0.0033139	0.013936	0.999379	219	2	3.376
Vpreb1	4	0.99615	0.99514	0.999313	19165	0	5.6011	0.0033167	0.013936	0.999379	220	4	5.6011
Prkra	4	0.068069	0.13053	0.838017	2834	1	5.8357	0.0033283	0.013936	0.999379	221	3	5.8357
4930447C04Rik	4	0.99666	0.99594	0.999468	19176	0	3.4872	0.003345	0.014001	0.999379	222	4	3.4872
Arhgef11	4	0.99663	0.99594	0.999468	19175	0	3.6666	0.0033659	0.014104	0.999379	223	4	3.6666
Pln	4	0.0053777	0.011328	0.629886	319	2	-1.0829	0.0033672	0.014104	0.999379	224	1	-1.0829
Klk5	4	0.90133	0.88363	0.97356	17369	0	5.4802	0.0034236	0.014328	0.999379	225	3	5.4802
Pacsin3	4	0.34658	0.47025	0.945217	8895	1	4.8568	0.0034369	0.014328	0.999379	226	3	4.8568
Vmn2r19	4	0.98687	0.98033	0.996434	18955	0	4.7664	0.003457	0.014328	0.999379	227	4	4.7664
Prkcsh	4	0.24991	0.37382	0.945217	7049	1	1.5511	0.0034822	0.014452	0.999379	228	3	1.5511
Xkr6	4	0.67121	0.6745	0.962274	13191	1	6.0904	0.0034951	0.014561	0.999379	229	3	6.0904
Calm5	2	0.62792	0.59489	0.956086	12568	0	4.4187	0.0034981	0.010039	0.999379	230	1	4.4187
Vamp1	4	0.042534	0.086831	0.803581	1946	2	2.7118	0.0035094	0.014562	0.999379	231	2	2.7118
Skint2	4	0.93698	0.91545	0.978443	18027	0	5.3157	0.0035131	0.014562	0.999379	232	3	5.3157
Taf4a	4	0.28735	0.41782	0.945217	7805	2	0.086356	0.0035397	0.014628	0.999379	233	2	0.086356
Wdr83	4	0.99642	0.99558	0.999366	19174	0	2.3933	0.0035751	0.01472	0.999379	234	4	2.3933
1700029F12Rik	4	0.99642	0.99558	0.999366	19173	0	3.5917	0.0035844	0.01472	0.999379	235	4	3.5917
Cdk20	4	0.31279	0.44271	0.945217	8238	1	4.1419	0.0035989	0.01472	0.999379	236	3	4.1419
Tmem52b	4	0.99639	0.99557	0.999366	19172	0	3.997	0.0036149	0.01472	0.999379	237	4	3.997
Slc22a3	3	0.5638	0.56328	0.954242	11705	1	6.756	0.0036399	0.012841	0.999379	238	2	6.756
Ppib	4	0.076893	0.1473	0.848976	3115	1	1.3296	0.0036546	0.015088	0.999379	239	3	1.3296
Bcor	4	0.99632	0.99551	0.999366	19170	0	1.91	0.0036808	0.015235	0.999379	240	4	1.91
Smurf1	4	0.97115	0.95944	0.990638	18655	0	6.1208	0.0037076	0.015301	0.999379	241	4	6.1208
Adra2a	4	0.27924	0.40638	0.945217	7678	2	2.314	0.0037121	0.015397	0.999379	242	2	2.314
Prkab2	4	0.99625	0.99536	0.999366	19169	0	3.785	0.0037484	0.015721	0.999379	243	4	3.785
Smad4	4	0.16294	0.26038	0.924199	5242	2	2.3304	0.0037686	0.015722	0.999379	244	2	2.3304
Syt1	4	0.27568	0.40539	0.945217	7609	2	0.26783	0.0037695	0.015722	0.999379	245	2	0.26783
Olfr1426	4	0.3512	0.47408	0.945217	8958	1	3.9426	0.003798	0.015893	0.999379	246	2	3.9426
Dnaic1	4	0.19256	0.30476	0.945217	5864	2	3.1498	0.0038232	0.015957	0.999379	247	2	3.1498
Rara	4	0.99617	0.99521	0.999313	19168	0	2.6986	0.0038258	0.015957	0.999379	248	4	2.6986
Slc12a4	4	0.99617	0.99521	0.999313	19167	0	3.5602	0.0038285	0.015957	0.999379	249	4	3.5602
Cpvl	4	0.99616	0.99514	0.999313	19166	0	3.6115	0.0038427	0.016024	0.999379	250	4	3.6115
Fbxl6	4	0.96375	0.95046	0.987706	18512	0	5.4988	0.0038486	0.016024	0.999379	251	4	5.4988
Tbc1d14	4	0.92612	0.90141	0.97513	17819	0	5.8389	0.0038512	0.016024	0.999379	252	3	5.8389
Gria2	4	0.90553	0.88652	0.97356	17443	0	3.7019	0.0038655	0.016025	0.999379	253	3	3.7019
Acsl1	4	0.99613	0.99514	0.999313	19164	0	3.7801	0.0038712	0.016025	0.999379	254	4	3.7801
Olfr1282	4	0.30633	0.43888	0.945217	8144	1	3.6372	0.0038845	0.016174	0.999379	255	3	3.6372
Cnbp	4	0.94767	0.92957	0.981219	18232	0	4.427	0.0038867	0.016174	0.999379	256	4	4.427
Eif5a2	4	0.74867	0.73443	0.962274	14456	1	4.005	0.0038952	0.016174	0.999379	257	3	4.005
Arsj	4	0.85665	0.83199	0.965375	16506	0	4.811	0.0039041	0.016174	0.999379	258	3	4.811
Tpst2	4	0.99609	0.99497	0.999313	19162	0	4.1274	0.0039117	0.016175	0.999379	259	4	4.1274
Gramd3	4	0.99602	0.99481	0.999271	19161	0	4.3369	0.0039779	0.020065	0.999379	260	4	4.3369
Vmn1r63	2	0.8189	0.78224	0.963641	15845	0	5.5917	0.003987	0.010716	0.999379	261	2	5.5917
Gm10921	4	0.99601	0.99481	0.999271	19160	0	3.9185	0.0039925	0.020065	0.999379	262	4	3.9185
Dnmt1	4	0.996	0.99481	0.999271	19159	0	4.2924	0.0040017	0.020065	0.999379	263	4	4.2924
Parp2	3	0.8707	0.84135	0.967185	16794	0	7.747	0.0040072	0.013859	0.999379	264	2	7.747
Adra2c	4	0.84318	0.81728	0.963641	16280	0	2.4506	0.0040569	0.020258	0.999379	265	3	2.4506
Olfr1122	4	0.9959	0.99472	0.999271	19157	0	5.359	0.0040979	0.020258	0.999379	266	4	5.359
D930015E06Rik	4	0.74225	0.73165	0.962274	14313	1	1.9508	0.0041143	0.020258	0.999379	267	3	1.9508
Sod2	4	0.98158	0.97234	0.993379	18852	0	5.574	0.0041272	0.020258	0.999379	268	4	5.574
Pde6d	4	0.098411	0.18282	0.868566	3822	2	-0.98228	0.0041718	0.020258	0.999379	269	1	-0.98228
Abl1	4	0.27461	0.40125	0.945217	7575	1	4.4196	0.0042282	0.020497	0.999379	270	3	4.4196
Kptn	4	0.38608	0.51056	0.945217	9646	2	3.5251	0.0042382	0.020497	0.999379	271	2	3.5251
Rnf7	4	0.99576	0.99456	0.999271	19156	0	3.6089	0.0042416	0.020497	0.999379	272	4	3.6089
Rnf139	4	0.92558	0.90141	0.97513	17807	0	4.2312	0.0042471	0.020757	0.999379	273	3	4.2312
Ces1c	4	0.56185	0.60352	0.956086	11700	1	3.2048	0.0042604	0.020866	0.999379	274	2	3.2048
Hist3h2ba	1	0.99573	0.99586	0.999468	19155	0	9.4857	0.004272	0.0041448	0.820209	275	1	9.4857
Trim56	4	0.1875	0.30305	0.945217	5764	1	-0.25223	0.0042867	0.020866	0.999379	276	1	-0.25223
Cd83	3	0.86959	0.84135	0.967185	16786	0	6.8846	0.0042955	0.017114	0.999379	277	2	6.8846
Prr13	4	0.96354	0.95003	0.987706	18507	0	4.4973	0.0043138	0.020867	0.999379	278	4	4.4973
Spag11a	4	0.87915	0.85398	0.967491	16942	0	4.9081	0.0043187	0.020867	0.999379	279	3	4.9081
Gamt	3	0.81259	0.79123	0.963641	15669	0	6.5204	0.004321	0.017114	0.999379	280	2	6.5204
Ubac2	3	0.10021	0.15841	0.848976	3873	1	7.279	0.0043306	0.017114	0.999379	281	2	7.279
Dip2a	4	0.9528	0.939	0.985375	18337	0	2.6073	0.0043441	0.020981	0.999379	282	4	2.6073
Sult2a3	4	0.99563	0.99456	0.999271	19154	0	3.3294	0.0043665	0.021238	0.999379	283	4	3.3294
Rasl11b	3	0.29075	0.38325	0.945217	7850	1	3.9917	0.0043808	0.017114	0.999379	284	2	3.9917
Arl8a	4	0.99561	0.99456	0.999271	19153	0	5.2094	0.0043871	0.021356	0.999379	285	4	5.2094
Olfr1494	3	0.99559	0.9947	0.999271	19151	0	4.2005	0.0044132	0.017115	0.999379	286	3	4.2005
Ciz1	4	0.6627	0.66613	0.962274	13086	1	5.5108	0.0044579	0.021559	0.999379	287	3	5.5108
Glt8d1	4	0.93837	0.91744	0.978608	18055	0	4.185	0.004459	0.021559	0.999379	288	3	4.185
Pcdhb5	4	0.99551	0.99447	0.999271	19150	0	3.6762	0.0044872	0.021559	0.999379	289	4	3.6762
Slc26a8	4	0.41282	0.52228	0.945217	9937	1	5.3994	0.0045	0.021706	0.999379	290	3	5.3994
Dstn	4	0.39085	0.51662	0.945217	9705	1	4.627	0.0045126	0.021706	0.999379	291	3	4.627
Park7	4	0.12021	0.20853	0.888323	4317	2	0.8581	0.0045164	0.021706	0.999379	292	2	0.8581
Vsig1	4	0.99546	0.99431	0.999271	19149	0	2.9883	0.0045404	0.021706	0.999379	293	4	2.9883
Nolc1	3	0.30401	0.38704	0.945217	8107	1	-2.0129	0.0045532	0.017292	0.999379	294	1	-2.0129
Olfr462	3	0.99544	0.9947	0.999271	19148	0	4.2285	0.0045566	0.017292	0.999379	295	3	4.2285
Hspa14	2	0.99544	0.99455	0.999271	19147	0	6.0159	0.0045574	0.011303	0.999379	296	2	6.0159
Gm14085	4	0.9623	0.9478	0.987527	18489	0	3.8028	0.0045739	0.021706	0.999379	297	4	3.8028
Slc22a27	4	0.85665	0.83199	0.965375	16549	0	4.6246	0.0046135	0.022015	0.999379	298	3	4.6246
Apc	4	0.25181	0.3767	0.945217	7100	1	3.5166	0.0046313	0.022016	0.999379	299	3	3.5166
Eml6	4	0.47761	0.54808	0.945217	10624	1	4.6983	0.0046598	0.022398	0.999379	300	3	4.6983
Oip5	1	0.99532	0.99586	0.999468	19146	0	9.5588	0.0046754	0.0041448	0.820209	301	1	9.5588
Sprr3	4	0.99532	0.99396	0.999271	19145	0	3.1589	0.0046801	0.022398	0.999379	302	4	3.1589
Pdcd6	3	0.99529	0.99441	0.999271	19144	0	4.7162	0.0047091	0.017749	0.999379	303	3	4.7162
Dyrk1a	3	0.98064	0.97502	0.994415	18833	0	7.4706	0.0047428	0.017928	0.999379	304	3	7.4706
Gm20867	4	0.99523	0.99388	0.999271	19143	0	3.6399	0.0047704	0.022467	0.999379	305	4	3.6399
Sec24d	4	0.9952	0.99378	0.999233	19142	0	4.8144	0.0047977	0.022667	0.999379	306	4	4.8144
Arc	4	0.096106	0.17806	0.867886	3749	3	-0.67344	0.0048036	0.022667	0.999379	307	1	-0.67344
Brf1	2	0.21691	0.2541	0.918335	6346	1	4.0247	0.0048208	0.01368	0.999379	308	1	4.0247
Slc9a2	4	0.02627	0.067491	0.803581	1300	2	-0.52172	0.004861	0.023043	0.999379	309	2	-0.52172
Pofut1	4	0.93543	0.91411	0.978443	17994	0	4.2515	0.0049181	0.023122	0.999379	310	3	4.2515
Speer4e	3	0.9929	0.99181	0.998588	19090	0	7.398	0.0049319	0.018211	0.999379	311	3	7.398
Nol4l	4	0.92862	0.90652	0.977533	17867	0	5.2357	0.0049758	0.02349	0.999379	312	3	5.2357
Tctn1	3	0.43437	0.4666	0.945217	10156	1	0.25254	0.0049841	0.018212	0.999379	313	1	0.25254
Fyn	4	0.9768	0.9659	0.992256	18762	0	6.0905	0.0049993	0.02349	0.999379	314	4	6.0905
Adam19	4	0.995	0.99313	0.998842	19141	0	3.6519	0.0050048	0.02349	0.999379	315	4	3.6519
Ctrc	4	0.41282	0.52228	0.945217	9928	1	4.4257	0.0050089	0.02349	0.999379	316	3	4.4257
B020031M17Rik	4	0.87412	0.84793	0.967185	16856	0	2.9331	0.0050333	0.02359	0.999379	317	3	2.9331
Hhex	3	0.99495	0.9941	0.999271	19140	0	5.5864	0.0050523	0.018212	0.999379	318	3	5.5864
Tmem120a	3	0.99143	0.99045	0.998588	19052	0	6.4231	0.0050829	0.018304	0.999379	319	3	6.4231
Fxyd1	4	0.95036	0.93421	0.983044	18279	0	4.8188	0.0050907	0.02414	0.999379	320	4	4.8188
Tcaf3	4	0.35405	0.4798	0.945217	9065	1	3.2386	0.005115	0.02414	0.999379	321	2	3.2386
Olfr61	4	0.65822	0.66123	0.962274	13033	1	5.6456	0.0051344	0.024255	0.999379	322	3	5.6456
Gm6696	4	0.97614	0.96573	0.992256	18749	0	3.7879	0.0051481	0.024255	0.999379	323	4	3.7879
Tmem132d	4	0.9948	0.99262	0.998588	19139	0	4.7503	0.0051978	0.024347	0.999379	324	4	4.7503
Ppih	4	0.9948	0.99262	0.998588	19138	0	3.5118	0.0051978	0.024347	0.999379	325	4	3.5118
Fbxo31	4	0.92178	0.89768	0.97356	17767	0	1.6003	0.0052055	0.024347	0.999379	326	3	1.6003
Tomm5	3	0.99479	0.994	0.999271	19137	0	6.1345	0.0052144	0.018304	0.999379	327	3	6.1345
Cyb5r4	3	0.87298	0.84323	0.967185	16823	0	7.1513	0.0052187	0.018304	0.999379	328	2	7.1513
Aplf	4	0.99477	0.99252	0.998588	19136	0	3.3845	0.0052286	0.02444	0.999379	329	4	3.3845
Arl1	4	0.99476	0.99252	0.998588	19135	0	3.475	0.005242	0.02444	0.999379	330	4	3.475
Yy1	2	0.57908	0.54946	0.945217	11908	0	4.1813	0.005252	0.014136	0.999379	331	1	4.1813
Abca2	4	0.9851	0.97778	0.995258	18922	0	2.799	0.0052629	0.02444	0.999379	332	4	2.799
Foxg1	4	0.99473	0.99252	0.998588	19134	0	3.7765	0.0052724	0.02444	0.999379	333	4	3.7765
Ei24	4	0.48853	0.55294	0.945217	10780	1	5.3561	0.005317	0.024441	0.999379	334	3	5.3561
Pex11g	4	0.72407	0.71843	0.962274	14036	1	1.871	0.0053203	0.024441	0.999379	335	3	1.871
Rce1	4	0.99101	0.98746	0.998541	19042	0	5.3523	0.0053305	0.024441	0.999379	336	4	5.3523
Ube2f	4	0.99466	0.99251	0.998588	19133	0	2.545	0.0053359	0.024441	0.999379	337	4	2.545
Fam47c	4	0.91599	0.89457	0.97356	17620	0	5.3893	0.0053703	0.024548	0.999379	338	3	5.3893
Tsc2	4	0.99461	0.99251	0.998588	19132	0	3.9815	0.0053884	0.024549	0.999379	339	4	3.9815
Defb28	4	0.20916	0.32617	0.945217	6194	1	3.9306	0.00539	0.024549	0.999379	340	3	3.9306
Rnd3	3	0.62014	0.61389	0.956086	12453	1	5.6453	0.0054148	0.018507	0.999379	341	2	5.6453
Smyd1	4	0.85214	0.82867	0.965375	16473	0	3.4426	0.0054351	0.024785	0.999379	342	3	3.4426
Sla2	4	0.97019	0.95836	0.990638	18630	0	4.134	0.0054598	0.024785	0.999379	343	4	4.134
Ticam1	4	0.83941	0.81609	0.963641	16223	0	5.7973	0.0054658	0.024785	0.999379	344	3	5.7973
Csnk1e	4	0.89518	0.87983	0.97356	17264	0	5.111	0.0054738	0.024785	0.999379	345	3	5.111
Psd4	4	0.99452	0.9924	0.998588	19131	0	3.1756	0.005476	0.024785	0.999379	346	4	3.1756
Ywhag	4	0.99452	0.9924	0.998588	19130	0	3.3752	0.0054795	0.024785	0.999379	347	4	3.3752
Nalcn	4	0.80669	0.78847	0.963641	15558	0	2.0243	0.0054925	0.024786	0.999379	348	3	2.0243
Mettl11b	4	0.9945	0.9924	0.998588	19129	0	3.6458	0.0055004	0.024786	0.999379	349	4	3.6458
Olfr384	4	0.99449	0.9924	0.998588	19128	0	5.6214	0.0055074	0.024786	0.999379	350	4	5.6214
Eya4	4	0.99448	0.9924	0.998588	19127	0	4.3195	0.0055214	0.024786	0.999379	351	4	4.3195
Bzw1	4	0.99448	0.9924	0.998588	19126	0	5.197	0.0055249	0.024786	0.999379	352	4	5.197
Alms1	4	0.99446	0.9924	0.998588	19125	0	5.8528	0.0055436	0.024786	0.999379	353	4	5.8528
Psenen	3	0.79537	0.76348	0.963641	15312	0	3.8855	0.005544	0.018718	0.999379	354	2	3.8855
Mta2	4	0.99443	0.9924	0.998588	19124	0	5.3498	0.0055671	0.024786	0.999379	355	4	5.3498
Tjp1	4	0.99443	0.9924	0.998588	19123	0	2.2633	0.005573	0.024786	0.999379	356	4	2.2633
Vmn1r100	3	0.76103	0.73316	0.962274	14665	0	1.0627	0.0055871	0.018718	0.999379	357	2	1.0627
Grrp1	4	0.37895	0.50053	0.945217	9514	1	2.7088	0.0056647	0.028743	0.999379	358	2	2.7088
Rsu1	4	0.99018	0.98583	0.997755	19025	0	3.4483	0.0057221	0.028743	0.999379	359	4	3.4483
2005-09-01	4	0.23135	0.35652	0.945217	6646	1	4.1498	0.0057382	0.028743	0.999379	360	3	4.1498
Ackr3	4	0.14425	0.23808	0.913828	4846	1	5.8232	0.0057466	0.028743	0.999379	361	3	5.8232
Plscr4	3	0.67874	0.65022	0.962274	13300	1	0.91101	0.0057593	0.018944	0.999379	362	2	0.91101
Olfr591	4	0.94303	0.92366	0.980074	18145	0	5.7106	0.0057652	0.028743	0.999379	363	4	5.7106
Ptpn7	4	0.99423	0.99217	0.998588	19122	0	2.7398	0.0057658	0.028743	0.999379	364	4	2.7398
Oosp2	4	0.99423	0.99217	0.998588	19121	0	2.9244	0.0057671	0.028743	0.999379	365	4	2.9244
Slc36a4	4	0.15991	0.25472	0.918335	5181	1	5.5631	0.0057714	0.028743	0.999379	366	3	5.5631
Tnrc6a	4	0.7638	0.74353	0.962274	14700	1	2.2485	0.0057794	0.028939	0.999379	367	2	2.2485
Cfap44	4	0.26585	0.39234	0.945217	7417	1	2.4345	0.0057947	0.028939	0.999379	368	2	2.4345
Diap3	4	0.99417	0.99195	0.998588	19120	0	3.8708	0.0058252	0.02894	0.999379	369	4	3.8708
Zfp750	4	0.99417	0.99184	0.998588	19119	0	2.5983	0.0058325	0.02904	0.999379	370	4	2.5983
Stard3	4	0.99415	0.99184	0.998588	19118	0	3.2436	0.0058471	0.029161	0.999379	371	4	3.2436
9530002B09Rik	4	0.41282	0.52228	0.945217	9940	1	5.7291	0.0058631	0.029161	0.999379	372	3	5.7291
Cilp	4	0.75922	0.74139	0.962274	14650	1	0.81013	0.0058942	0.029162	0.999379	373	2	0.81013
Npff	4	0.99409	0.99173	0.998588	19116	0	4.2803	0.005907	0.029258	0.999379	374	4	4.2803
Faim	4	0.47258	0.54599	0.945217	10579	1	4.3464	0.0059396	0.029258	0.999379	375	3	4.3464
Uox	4	0.080932	0.15106	0.848976	3243	2	0.68969	0.0059516	0.029258	0.999379	376	2	0.68969
Serpinb1a	4	0.89792	0.88153	0.97356	17304	0	4.6699	0.0059684	0.029258	0.999379	377	3	4.6699
1810013L24Rik	3	0.994	0.99355	0.999107	19115	0	4.2123	0.0059966	0.019145	0.999379	378	3	4.2123
Zscan25	4	0.71671	0.7122	0.962274	13876	1	4.2909	0.0060089	0.029258	0.999379	379	3	4.2909
Ankrd32	3	0.99399	0.99355	0.999107	19114	0	4.23	0.0060137	0.019145	0.999379	380	3	4.23
Ankrd1	3	0.99397	0.99343	0.999092	19113	0	3.9231	0.006028	0.019253	0.999379	381	3	3.9231
Olfr191	4	0.86468	0.84269	0.967185	16682	0	4.6671	0.0060442	0.029258	0.999379	382	3	4.6671
Rfxap	4	0.020433	0.052904	0.803581	1059	2	2.6302	0.0060494	0.029258	0.999379	383	2	2.6302
Hspbap1	4	0.83796	0.81427	0.963641	16198	0	4.7438	0.0060599	0.029258	0.999379	384	3	4.7438
Plekhg1	4	0.99393	0.99173	0.998588	19112	0	4.987	0.0060683	0.029258	0.999379	385	4	4.987
Maea	3	0.85209	0.81898	0.963641	16448	0	7.3273	0.006094	0.019448	0.999379	386	2	7.3273
Fmo1	4	0.89515	0.87983	0.97356	17261	0	5.1189	0.0061021	0.029503	0.999379	387	3	5.1189
Slc18a3	4	0.17667	0.27862	0.939208	5565	2	2.9501	0.0061126	0.029627	0.999379	388	2	2.9501
Tex24	3	0.99388	0.99311	0.998842	19111	0	5.2108	0.0061158	0.019748	0.999379	389	3	5.2108
Abcd3	4	0.99388	0.9916	0.998588	19110	0	3.6317	0.0061223	0.029767	0.999379	390	4	3.6317
Zg16	4	0.87412	0.84793	0.967185	16850	0	-0.48851	0.0061237	0.029767	0.999379	391	1	-0.48851
Chrna10	4	0.99386	0.9916	0.998588	19109	0	2.5531	0.0061438	0.029768	0.999379	392	4	2.5531
Olfr996	4	0.98158	0.97234	0.993379	18853	0	4.9634	0.0061459	0.029768	0.999379	393	4	4.9634
H2afb2	4	0.99384	0.99147	0.998588	19108	0	2.191	0.0061615	0.029883	0.999379	394	4	2.191
Psmb10	4	0.58485	0.61604	0.956086	11995	1	1.966	0.0062384	0.030419	0.999379	395	2	1.966
Alpl	3	0.99375	0.99302	0.99883	19107	0	4.2299	0.0062541	0.02004	0.999379	396	3	4.2299
Rdh16	4	0.99373	0.99135	0.998588	19106	0	3.1807	0.0062687	0.030419	0.999379	397	4	3.1807
Eftud1	3	0.58001	0.5762	0.956086	11938	1	7.4087	0.0062785	0.020041	0.999379	398	2	7.4087
Hs2st1	4	0.24235	0.36657	0.945217	6889	2	2.6433	0.006288	0.030419	0.999379	399	2	2.6433
4921507P07Rik	4	0.15236	0.24636	0.914062	5004	2	0.82893	0.0062958	0.030419	0.999379	400	2	0.82893
Sez6l	3	0.83342	0.80755	0.963641	16095	0	0.37365	0.0063189	0.020154	0.999379	401	1	0.37365
Akr1c19	4	0.10445	0.19389	0.876997	3988	1	5.3015	0.0063255	0.03042	0.999379	402	3	5.3015
Slc16a6	4	0.90772	0.8882	0.97356	17481	0	3.9301	0.0063309	0.03042	0.999379	403	3	3.9301
Hcar1	4	0.42437	0.52506	0.945217	10038	1	5.9858	0.0063356	0.03042	0.999379	404	3	5.9858
Rassf1	4	0.99366	0.99135	0.998588	19105	0	3.0054	0.0063357	0.03042	0.999379	405	4	3.0054
Tyrp1	4	0.95432	0.94001	0.985375	18360	0	2.6865	0.0063531	0.03042	0.999379	406	4	2.6865
Dnah5	4	0.91416	0.89298	0.97356	17588	0	3.7487	0.0063685	0.03042	0.999379	407	2	3.7487
Dbx1	4	0.99363	0.99135	0.998588	19104	0	3.0257	0.0063707	0.03042	0.999379	408	4	3.0257
Serpina3m	4	0.99361	0.99135	0.998588	19103	0	3.7794	0.0063876	0.03042	0.999379	409	4	3.7794
Olfr535	4	0.99361	0.99135	0.998588	19102	0	4.2942	0.0063942	0.03042	0.999379	410	4	4.2942
Hilpda	4	0.9824	0.97346	0.993783	18863	0	3.8219	0.0063955	0.03042	0.999379	411	4	3.8219
Mrps31	4	0.65822	0.66123	0.962274	13006	1	6.1789	0.0064085	0.030544	0.999379	412	3	6.1789
H2-T3	3	0.99357	0.99266	0.998588	19101	0	5.2349	0.0064318	0.020579	0.999379	413	3	5.2349
4930578I06Rik	4	0.33024	0.4558	0.945217	8592	1	4.8357	0.0064441	0.030544	0.999379	414	3	4.8357
Olfr707	2	0.99354	0.99237	0.998588	19100	0	6.962	0.0064601	0.015299	0.999379	415	2	6.962
Cldn10	4	0.92677	0.90365	0.976462	17831	0	5.0226	0.0064603	0.030544	0.999379	416	3	5.0226
Ptbp2	4	0.61307	0.62779	0.956086	12391	1	5.3931	0.0064663	0.030544	0.999379	417	3	5.3931
Yif1a	4	0.32628	0.45468	0.945217	8514	2	-0.34647	0.0064678	0.030544	0.999379	418	1	-0.34647
Gga2	3	0.90596	0.88263	0.97356	17449	0	2.6871	0.0064911	0.020687	0.999379	419	3	2.6871
Spata7	4	0.29481	0.42473	0.945217	7963	1	0.7795	0.0065252	0.030544	0.999379	420	2	0.7795
Zfp366	3	0.44515	0.47419	0.945217	10270	1	5.6927	0.0065338	0.020808	0.999379	421	2	5.6927
Atad2b	3	0.99346	0.99241	0.998588	19099	0	6.2311	0.0065401	0.020808	0.999379	422	3	6.2311
Wbp1	4	0.99345	0.99123	0.998588	19098	0	3.4553	0.0065533	0.030654	0.999379	423	4	3.4553
Sypl	4	0.14967	0.24312	0.914062	4947	2	3.0917	0.0065637	0.030654	0.999379	424	2	3.0917
Npb	4	0.65279	0.65774	0.962274	12943	1	2.8611	0.0065825	0.030654	0.999379	425	3	2.8611
Gper1	4	0.9934	0.99123	0.998588	19097	0	3.0852	0.0065972	0.030654	0.999379	426	4	3.0852
Cfd	3	0.99336	0.99229	0.998588	19096	0	5.162	0.0066373	0.021141	0.999379	427	3	5.162
Setdb1	2	0.99335	0.99199	0.998588	19095	0	7.085	0.0066467	0.015665	0.999379	428	2	7.085
Msmp	4	0.7732	0.75054	0.962274	14909	1	4.6625	0.0066781	0.030794	0.999379	429	3	4.6625
Kcnn4	4	0.44197	0.5342	0.945217	10252	1	1.4161	0.0066972	0.030794	0.999379	430	2	1.4161
Ubxn10	4	0.57579	0.61051	0.956086	11887	1	4.9698	0.0067146	0.030934	0.999379	431	3	4.9698
Sell	4	0.99325	0.99123	0.998588	19094	0	3.8945	0.0067479	0.030935	0.999379	432	4	3.8945
Srrm4	4	0.79336	0.77766	0.963641	15287	0	0.55475	0.0067546	0.031093	0.999379	433	2	0.55475
Olfr1047	3	0.17312	0.27302	0.934476	5474	1	5.4855	0.0067622	0.021473	0.999379	434	2	5.4855
Spata21	4	0.5607	0.60216	0.956086	11685	1	-1.1249	0.0068119	0.031446	0.999379	435	1	-1.1249
Bcl6b	4	0.8322	0.80744	0.963641	16066	0	3.8415	0.0068228	0.031446	0.999379	436	3	3.8415
Fam46d	4	0.78143	0.7568	0.963472	15037	1	2.6084	0.0068692	0.031543	0.999379	437	3	2.6084
Tubgcp4	1	0.99312	0.99376	0.999233	19093	0	8.3298	0.0068798	0.0062418	0.834882	438	1	8.3298
Bmp1	3	0.553	0.54961	0.945217	11581	1	7.0293	0.006946	0.02181	0.999379	439	2	7.0293
Arhgap4	4	0.99304	0.99088	0.998588	19092	0	3.1614	0.0069572	0.031543	0.999379	440	4	3.1614
Lin28b	4	0.72845	0.72327	0.962274	14110	1	3.655	0.0069962	0.031929	0.999379	441	2	3.655
Ppp1r3g	2	0.97991	0.97608	0.994737	18818	0	7.4554	0.0070331	0.01584	0.999379	442	2	7.4554
Vmn1r205	4	0.99296	0.99076	0.998588	19091	0	3.163	0.007036	0.03193	0.999379	443	4	3.163
Ddx39b	4	0.81831	0.79423	0.963641	15829	0	4.0312	0.0070583	0.032076	0.999379	444	3	4.0312
Gbas	4	0.7576	0.74003	0.962274	14617	1	5.5723	0.0070937	0.032221	0.999379	445	3	5.5723
Foxa2	4	0.63183	0.63826	0.956086	12643	1	2.6994	0.0070986	0.032221	0.999379	446	3	2.6994
Ifne	4	0.99288	0.99063	0.998588	19089	0	3.6507	0.0071161	0.032334	0.999379	447	4	3.6507
Clstn1	3	0.87988	0.8496	0.967425	16965	0	6.8135	0.0071404	0.025054	0.999379	448	3	6.8135
Chmp7	4	0.37895	0.50053	0.945217	9503	1	-0.39866	0.0071559	0.032955	0.999379	449	1	-0.39866
Kif21b	4	0.99283	0.99051	0.998588	19088	0	2.9254	0.0071728	0.032955	0.999379	450	4	2.9254
Akr1c13	4	0.99282	0.99051	0.998588	19087	0	2.9304	0.0071827	0.032956	0.999379	451	4	2.9304
Psmd12	1	0.9928	0.99273	0.998588	19086	0	8.4837	0.0071968	0.0072749	0.891814	452	1	8.4837
Dedd	4	0.98714	0.98078	0.996676	18962	0	4.9404	0.0071983	0.032956	0.999379	453	4	4.9404
Tas1r1	4	0.99278	0.99038	0.998588	19085	0	2.9575	0.0072198	0.033065	0.999379	454	4	2.9575
Zfp414	4	0.46886	0.54323	0.945217	10527	1	3.3745	0.007246	0.033204	0.999379	455	2	3.3745
Rgn	4	0.99273	0.99038	0.998588	19084	0	3.7234	0.007267	0.033204	0.999379	456	4	3.7234
Nyap2	4	0.99273	0.99038	0.998588	19083	0	3.2761	0.0072699	0.033204	0.999379	457	4	3.2761
Calb2	4	0.053495	0.10514	0.811199	2358	2	0.48219	0.0072705	0.033204	0.999379	458	2	0.48219
Prl3d1	3	0.99269	0.99157	0.998588	19081	0	3.6431	0.0073107	0.025271	0.999379	459	3	3.6431
Klhl28	3	0.22436	0.32907	0.945217	6501	1	6.7434	0.0073125	0.025271	0.999379	460	2	6.7434
Gm20854	4	0.29883	0.42912	0.945217	8025	1	1.3485	0.0073278	0.033322	0.999379	461	2	1.3485
Ptf1a	4	0.93076	0.90861	0.977646	17905	0	4.9009	0.0073329	0.033322	0.999379	462	3	4.9009
Elfn2	4	0.9774	0.96691	0.992256	18772	0	4.4997	0.0073644	0.033656	0.999379	463	4	4.4997
Ttc30a2	4	0.97387	0.96388	0.992256	18705	0	5.7061	0.0073886	0.033864	0.999379	464	4	5.7061
Sox10	4	0.98621	0.97944	0.996314	18946	0	5.494	0.0073911	0.033864	0.999379	465	4	5.494
Picalm	4	0.61307	0.62779	0.956086	12343	1	3.3185	0.0074013	0.033986	0.999379	466	2	3.3185
Lime1	4	0.69645	0.6926	0.962274	13542	1	5.4686	0.0074471	0.033986	0.999379	467	3	5.4686
Pik3r6	4	0.99255	0.98948	0.998588	19080	0	2.8145	0.007448	0.033986	0.999379	468	4	2.8145
Ifna11	4	0.37496	0.49708	0.945217	9425	1	4.4476	0.0074911	0.033987	0.999379	469	3	4.4476
Gm13119	2	0.97925	0.97509	0.994415	18806	0	6.9106	0.0074925	0.0162	0.999379	470	2	6.9106
Kynu	4	0.18876	0.3039	0.945217	5795	2	-0.10399	0.0074998	0.033987	0.999379	471	2	-0.10399
Gcgr	3	0.99248	0.99131	0.998588	19079	0	6.6389	0.0075211	0.025723	0.999379	472	3	6.6389
3110043O21Rik	3	0.79287	0.7599	0.963641	15274	0	2.6857	0.0075236	0.025723	0.999379	473	2	2.6857
Slc35e3	4	0.38204	0.50284	0.945217	9557	1	3.3672	0.0075291	0.034112	0.999379	474	2	3.3672
1500012F01Rik	4	0.94106	0.91998	0.978771	18114	0	4.2757	0.0075349	0.034112	0.999379	475	4	4.2757
Pcnxl2	4	0.57026	0.60635	0.956086	11802	1	2.2425	0.0075571	0.034112	0.999379	476	3	2.2425
Kat2a	4	0.80351	0.78452	0.963641	15495	0	1.4821	0.0076144	0.034112	0.999379	477	2	1.4821
Adamts14	4	0.99238	0.98934	0.998588	19078	0	4.1747	0.0076159	0.034112	0.999379	478	4	4.1747
Slc37a1	4	0.95605	0.94151	0.986321	18376	0	4.268	0.0076226	0.034218	0.999379	479	4	4.268
Dcaf11	3	0.32923	0.39842	0.945217	8558	1	6.8918	0.0076376	0.025723	0.999379	480	2	6.8918
Ccdc12	2	0.99228	0.99102	0.998588	19076	0	6.6809	0.0077206	0.01659	0.999379	481	2	6.6809
Glrx3	2	0.82162	0.78609	0.963641	15867	0	5.2255	0.0077221	0.01659	0.999379	482	2	5.2255
Brd7	4	0.99225	0.98922	0.998588	19074	0	2.9447	0.0077536	0.034649	0.999379	483	4	2.9447
Tgif2lx2	3	0.99224	0.99131	0.998588	19073	0	4.2893	0.0077558	0.025723	0.999379	484	3	4.2893
Cxx1a	2	0.99224	0.99102	0.998588	19072	0	5.7611	0.0077612	0.01659	0.999379	485	2	5.7611
Aspg	4	0.99223	0.98922	0.998588	19071	0	3.9074	0.0077701	0.034649	0.999379	486	4	3.9074
Arl4a	4	0.0054925	0.011701	0.629886	328	1	5.1522	0.0077814	0.034771	0.999379	487	3	5.1522
Cwf19l2	3	0.70648	0.68405	0.962274	13732	0	1.7599	0.0077816	0.02597	0.999379	488	2	1.7599
Errfi1	4	0.98096	0.97191	0.993379	18840	0	4.3806	0.0077863	0.034771	0.999379	489	4	4.3806
Ccar1	4	0.99219	0.98908	0.998588	19070	0	3.2854	0.0078056	0.034771	0.999379	490	4	3.2854
Pgr	4	0.80711	0.78847	0.963641	15564	0	5.1769	0.0078291	0.034771	0.999379	491	3	5.1769
Cyp4a12b	4	0.99215	0.98908	0.998588	19069	0	3.1972	0.0078458	0.034771	0.999379	492	4	3.1972
Olfr1351	4	0.90752	0.8882	0.97356	17477	0	1.6072	0.0079009	0.034927	0.999379	493	2	1.6072
Mup20	3	0.99199	0.99118	0.998588	19068	0	5.7552	0.0080109	0.026328	0.999379	494	3	5.7552
Olfr1022	4	0.38875	0.51521	0.945217	9677	1	3.0724	0.0080154	0.034927	0.999379	495	2	3.0724
Dcaf8	4	0.95432	0.94001	0.985375	18354	0	5.2163	0.0080727	0.03506	0.999379	496	4	5.2163
Fbxw7	3	0.99192	0.99118	0.998588	19066	0	1.3891	0.0080821	0.026848	0.999379	497	3	1.3891
Sstr2	4	0.99187	0.98893	0.998588	19065	0	2.7859	0.0081276	0.03506	0.999379	498	4	2.7859
Arl3	4	0.98744	0.98201	0.997143	18967	0	4.9757	0.0081277	0.03506	0.999379	499	4	4.9757
Dnajc5b	4	0.77209	0.74918	0.962274	14887	1	0.40882	0.00813	0.03506	0.999379	500	2	0.40882
Pon1	3	0.99183	0.99118	0.998588	19064	0	3.9153	0.0081677	0.026848	0.999379	501	3	3.9153
Kcnk1	4	0.92961	0.90791	0.977646	17883	0	2.7236	0.0082446	0.03506	0.999379	502	2	2.7236
Rab9	4	0.49552	0.56139	0.954242	10855	1	3.141	0.0082987	0.035599	0.999379	503	2	3.141
Hps6	4	0.41282	0.52228	0.945217	9912	1	4.0783	0.0083018	0.035599	0.999379	504	3	4.0783
Olfr1413	3	0.99169	0.99104	0.998588	19063	0	3.3729	0.0083122	0.027233	0.999379	505	3	3.3729
Olfr690	4	0.21393	0.33194	0.945217	6296	2	1.8171	0.0083537	0.035847	0.999379	506	2	1.8171
Amy2a4	4	0.91825	0.89691	0.97356	17669	0	1.8404	0.0083591	0.035847	0.999379	507	3	1.8404
Clcf1	4	0.79832	0.78177	0.963641	15350	0	3.1577	0.0083844	0.035973	0.999379	508	2	3.1577
Gm1587	4	0.99161	0.98822	0.998541	19062	0	4.5474	0.0083881	0.035973	0.999379	509	4	4.5474
Lzts2	4	0.99117	0.98769	0.998541	19047	0	4.7765	0.0083965	0.035973	0.999379	510	4	4.7765
Arid1a	4	0.9916	0.98822	0.998541	19061	0	1.721	0.008404	0.035973	0.999379	511	4	1.721
Zic4	4	0.99159	0.98822	0.998541	19060	0	2.4057	0.0084136	0.035973	0.999379	512	4	2.4057
Klrb1c	4	0.40453	0.52016	0.945217	9850	1	4.3846	0.0084274	0.035973	0.999379	513	3	4.3846
Prl2c1	4	0.99157	0.98821	0.998541	19059	0	2.9282	0.0084313	0.035974	0.999379	514	4	2.9282
Ins2	4	0.99157	0.98821	0.998541	19058	0	3.6204	0.0084345	0.035974	0.999379	515	4	3.6204
Ppp2cb	4	0.90159	0.88404	0.97356	17371	0	4.5231	0.0084414	0.035974	0.999379	516	3	4.5231
Clic5	4	0.99155	0.98821	0.998541	19057	0	2.2703	0.0084473	0.035974	0.999379	517	4	2.2703
Rrp1	1	0.99154	0.99272	0.998588	19056	0	9.2027	0.0084647	0.0072754	0.891814	518	1	9.2027
Pdgfrl	4	0.99153	0.98821	0.998541	19055	0	3.5699	0.0084698	0.035974	0.999379	519	4	3.5699
Cxcl2	4	0.99152	0.98821	0.998541	19054	0	4.0987	0.0084795	0.035974	0.999379	520	4	4.0987
2310079G19Rik	4	0.44197	0.5342	0.945217	10236	1	4.6882	0.0085013	0.036109	0.999379	521	3	4.6882
Cyp2j8	4	0.2079	0.32528	0.945217	6171	1	5.3917	0.0085237	0.036245	0.999379	522	3	5.3917
Gas1	4	0.99147	0.9879	0.998541	19053	0	2.7092	0.0085295	0.036245	0.999379	523	4	2.7092
Etnk2	4	0.70496	0.70099	0.962274	13706	1	2.5725	0.0085309	0.036245	0.999379	524	3	2.5725
Rps6kb1	4	0.31279	0.44271	0.945217	8272	1	4.8763	0.0085446	0.036245	0.999379	525	3	4.8763
Mrgprf	3	0.99141	0.99045	0.998588	19051	0	4.209	0.0085866	0.028031	0.999379	526	3	4.209
Sertad4	4	0.83458	0.80867	0.963641	16113	0	1.9221	0.0085882	0.036245	0.999379	527	3	1.9221
Nppa	2	0.44478	0.43599	0.945217	10266	1	3.9508	0.0086118	0.017589	0.999379	528	1	3.9508
Tescl	4	0.96131	0.9473	0.987282	18471	0	5.1322	0.0086494	0.036245	0.999379	529	4	5.1322
Nav2	4	0.91662	0.89457	0.97356	17632	0	3.797	0.0086563	0.036245	0.999379	530	3	3.797
Naa40	4	0.96509	0.95135	0.987706	18537	0	4.5459	0.0086601	0.036245	0.999379	531	4	4.5459
Rimbp3	4	0.99132	0.9879	0.998541	19050	0	2.7248	0.0086842	0.036407	0.999379	532	4	2.7248
Actl10	4	0.99131	0.9879	0.998541	19049	0	3.2856	0.0086875	0.036407	0.999379	533	4	3.2856
Aldoart2	4	0.79206	0.77632	0.963641	15261	0	4.3832	0.0087027	0.036407	0.999379	534	3	4.3832
Cass4	4	0.99126	0.9879	0.998541	19048	0	4.5031	0.0087401	0.036407	0.999379	535	4	4.5031
Epsti1	4	0.52224	0.58105	0.956086	11147	1	2.0488	0.0087599	0.036528	0.999379	536	3	2.0488
Il2rg	4	0.8772	0.85095	0.967425	16905	0	4.4537	0.0087898	0.036528	0.999379	537	3	4.4537
Homer3	4	0.94787	0.92957	0.981219	18235	0	4.9895	0.0088115	0.036529	0.999379	538	4	4.9895
Ccl11	4	0.83796	0.81427	0.963641	16214	0	2.0732	0.0088172	0.036529	0.999379	539	3	2.0732
Clstn3	4	0.97551	0.96491	0.992256	18739	0	4.9177	0.0088388	0.036668	0.999379	540	4	4.9177
Vps41	2	0.9282	0.91479	0.978443	17859	0	5.5997	0.0088413	0.017589	0.999379	541	2	5.5997
Pitpnc1	4	0.86182	0.83629	0.966691	16620	0	0.62774	0.0088744	0.037153	0.999379	542	3	0.62774
Nat8l	4	0.79832	0.78177	0.963641	15364	0	4.2551	0.0088818	0.037153	0.999379	543	3	4.2551
Gnai3	4	0.99111	0.98761	0.998541	19046	0	4.1233	0.0088893	0.037153	0.999379	544	4	4.1233
Pold4	3	0.99109	0.99015	0.998588	19045	0	5.6391	0.0089077	0.028564	0.999379	545	3	5.6391
Hsd17b2	4	0.99109	0.98761	0.998541	19044	0	3.5948	0.0089093	0.037311	0.999379	546	4	3.5948
Abcg5	4	0.93957	0.91872	0.978771	18081	0	5.7995	0.0089454	0.037312	0.999379	547	3	5.7995
Zfp773	4	0.95812	0.94301	0.986321	18405	0	3.9129	0.0089513	0.037312	0.999379	548	4	3.9129
Nfkbid	4	0.99102	0.98746	0.998541	19043	0	3.1843	0.0089781	0.037447	0.999379	549	4	3.1843
Ppp2r2a	2	0.6842	0.65576	0.962274	13347	0	4.2633	0.0089847	0.017589	0.999379	550	1	4.2633
Mpdu1	4	0.98873	0.98304	0.997143	18997	0	4.0088	0.0089889	0.037447	0.999379	551	4	4.0088
Rnf112	4	0.037218	0.079774	0.803581	1744	1	5.4028	0.0090273	0.037621	0.999379	552	3	5.4028
Zmpste24	3	0.61279	0.60634	0.956086	12334	1	3.1743	0.0090281	0.028969	0.999379	553	2	3.1743
Bdkrb1	4	0.4494	0.53697	0.945217	10321	1	4.9466	0.0090418	0.037759	0.999379	554	3	4.9466
Sostdc1	4	0.54664	0.59374	0.956086	11513	1	2.9623	0.0090462	0.037759	0.999379	555	3	2.9623
Fryl	3	0.99093	0.99	0.998588	19041	0	4.2314	0.0090703	0.029235	0.999379	556	3	4.2314
Slc45a4	4	0.99092	0.98716	0.998414	19040	0	2.2556	0.0090844	0.037888	0.999379	557	4	2.2556
Zfx	4	0.86917	0.84534	0.967185	16757	0	0.1438	0.0091034	0.038061	0.999379	558	2	0.1438
Ube2d2b	4	0.062426	0.12185	0.826231	2652	1	4.231	0.0091165	0.038061	0.999379	559	3	4.231
Slc35c2	4	0.99087	0.98716	0.998414	19039	0	3.4699	0.0091337	0.038062	0.999379	560	4	3.4699
Gm17660	4	0.7591	0.74139	0.962274	14647	1	4.634	0.0091556	0.03838	0.999379	561	3	4.634
Jmjd4	4	0.93649	0.91545	0.978443	18017	0	2.4928	0.0091607	0.03838	0.999379	562	3	2.4928
Ofd1	4	0.99082	0.98682	0.998227	19037	0	3.0299	0.0091815	0.038675	0.999379	563	4	3.0299
Poldip2	4	0.31397	0.44431	0.945217	8294	2	0.099592	0.0092179	0.038676	0.999379	564	2	0.099592
1700001J03Rik	3	0.99077	0.98969	0.998588	19036	0	4.4675	0.0092291	0.029499	0.999379	565	3	4.4675
Extl3	4	0.99076	0.98665	0.998169	19035	0	2.6947	0.0092406	0.038823	0.999379	566	4	2.6947
Bmp6	2	0.44977	0.43965	0.945217	10331	1	4.2216	0.0092429	0.017986	0.999379	567	1	4.2216
Vmn2r23	3	0.14814	0.23525	0.911758	4907	1	1.6983	0.0092429	0.029499	0.999379	568	2	1.6983
Ptgis	3	0.16755	0.26372	0.928713	5354	1	6.8208	0.0092624	0.029769	0.999379	569	2	6.8208
Mcidas	4	0.62197	0.63408	0.956086	12489	1	2.4571	0.0092751	0.038824	0.999379	570	3	2.4571
Flot2	4	0.99072	0.98665	0.998169	19034	0	2.9544	0.0092828	0.038824	0.999379	571	4	2.9544
Ptcra	4	0.78323	0.75824	0.963641	15095	1	4.983	0.00929	0.038824	0.999379	572	3	4.983
Fam64a	4	0.99067	0.98665	0.998169	19033	0	3.2444	0.0093259	0.039309	0.999379	573	4	3.2444
Cplx2	3	0.99065	0.98969	0.998588	19032	0	5.0025	0.0093533	0.029769	0.999379	574	3	5.0025
Sp8	4	0.975	0.96491	0.992256	18728	0	4.9624	0.0093576	0.04286	0.999379	575	4	4.9624
Nup50	4	0.93971	0.91872	0.978771	18085	0	4.6854	0.0093605	0.04286	0.999379	576	3	4.6854
Dnajc13	4	0.2636	0.38752	0.945217	7374	2	-0.28319	0.0093896	0.04286	0.999379	577	2	-0.28319
Rab44	4	0.12475	0.21521	0.899453	4399	1	5.1603	0.0093992	0.04286	0.999379	578	3	5.1603
Wdsub1	4	0.37074	0.49444	0.945217	9325	1	5.1446	0.0094122	0.04286	0.999379	579	3	5.1446
Nrg3	4	0.95179	0.93744	0.984724	18314	0	5.1814	0.0094398	0.043019	0.999379	580	4	5.1814
Lalba	4	0.49757	0.56206	0.954242	10873	1	1.2115	0.0094468	0.043019	0.999379	581	2	1.2115
Snhg11	4	0.99055	0.98665	0.998169	19031	0	3.1148	0.0094493	0.04302	0.999379	582	4	3.1148
Vmn1r5	4	0.33071	0.4558	0.945217	8595	1	3.9902	0.0094576	0.04302	0.999379	583	3	3.9902
Rbm20	4	0.99051	0.98633	0.998047	19030	0	2.8874	0.0094931	0.043301	0.999379	584	4	2.8874
Manbal	4	0.3438	0.46802	0.945217	8848	2	-0.03312	0.009504	0.043444	0.999379	585	2	-0.03312
Kif13a	4	0.90011	0.88153	0.97356	17339	0	4.804	0.0095196	0.043444	0.999379	586	3	4.804
Olfr67	4	0.00037455	0.00075704	0.537015	20	1	4.663	0.009531	0.043444	0.999379	587	3	4.663
Zfp46	4	0.16742	0.26689	0.928713	5345	1	2.4801	0.0095612	0.043444	0.999379	588	3	2.4801
Asb6	4	0.9904	0.98599	0.997812	19029	0	3.4064	0.0096022	0.043586	0.999379	589	4	3.4064
Olfr1262	4	0.86605	0.8443	0.967185	16705	0	4.7188	0.00964	0.043587	0.999379	590	3	4.7188
4930544D05Rik	4	0.99034	0.98599	0.997812	19028	0	3.2347	0.0096571	0.043587	0.999379	591	4	3.2347
Fgf3	3	0.030249	0.063799	0.803581	1461	1	1.8099	0.0096724	0.030213	0.999379	592	2	1.8099
Kcnk4	2	0.94587	0.94128	0.986321	18198	0	5.168	0.0096731	0.018614	0.999379	593	2	5.168
Tnfrsf23	4	0.38435	0.50684	0.945217	9593	2	1.1894	0.0096757	0.043587	0.999379	594	2	1.1894
Ehd4	4	0.7526	0.73587	0.962274	14525	1	4.5886	0.0096977	0.043587	0.999379	595	3	4.5886
Tor1a	4	0.71229	0.70942	0.962274	13787	1	5.1352	0.009718	0.043728	0.999379	596	3	5.1352
Mcts2	4	0.50033	0.56274	0.954242	10906	1	4.9133	0.0097189	0.043728	0.999379	597	3	4.9133
Crlf1	4	0.99028	0.98583	0.997755	19027	0	2.7412	0.0097248	0.043728	0.999379	598	4	2.7412
Purg	4	0.58076	0.61468	0.956086	11959	1	0.0049691	0.0097329	0.043728	0.999379	599	2	0.0049691
Dnajc6	3	0.17059	0.26871	0.928713	5411	2	-0.93792	0.0097583	0.030214	0.999379	600	1	-0.93792
Abcc4	3	0.61243	0.60634	0.956086	12333	1	6.3016	0.009763	0.030214	0.999379	601	2	6.3016
Tec	3	0.77721	0.74995	0.962274	14979	0	6.3029	0.0097725	0.030214	0.999379	602	2	6.3029
Apbb3	4	0.31011	0.43999	0.945217	8209	1	4.6544	0.0097848	0.043729	0.999379	603	3	4.6544
Maf	4	0.84864	0.82309	0.96423	16384	0	0.69438	0.0097901	0.043729	0.999379	604	3	0.69438
Tmod4	4	0.97243	0.96205	0.992038	18679	0	5.2576	0.0098021	0.043893	0.999379	605	4	5.2576
Snx20	4	0.85665	0.83199	0.965375	16531	0	4.0905	0.0098342	0.043893	0.999379	606	3	4.0905
Tspan14	4	0.99016	0.98583	0.997755	19024	0	4.1355	0.0098449	0.043894	0.999379	607	4	4.1355
Fam159a	4	0.99015	0.98583	0.997755	19023	0	2.8926	0.0098503	0.043894	0.999379	608	4	2.8926
Ptpn1	4	0.99014	0.98583	0.997755	19022	0	3.9511	0.0098593	0.043894	0.999379	609	4	3.9511
Kcnh1	3	0.69905	0.68034	0.962274	13582	0	6.2189	0.0098871	0.03047	0.999379	610	2	6.2189
Adrb3	4	0.87775	0.85095	0.967425	16918	0	1.5487	0.0099045	0.044034	0.999379	611	3	1.5487
Sec23b	4	0.99004	0.98567	0.997755	19021	0	2.8351	0.0099571	0.044035	0.999379	612	4	2.8351
Nr0b1	4	0.99003	0.98558	0.997755	19020	0	3.3894	0.0099698	0.04411	0.999379	613	4	3.3894
Kdm3b	3	0.63826	0.62604	0.956086	12721	1	6.4042	0.0099869	0.030909	0.999379	614	2	6.4042
1600012H06Rik	4	0.98999	0.9855	0.997755	19019	0	3.352	0.010008	0.044186	0.999379	615	4	3.352
Rsph3b	4	0.97061	0.95908	0.990638	18639	0	5.0697	0.010013	0.044186	0.999379	616	4	5.0697
Dgke	3	0.83778	0.81073	0.963641	16164	0	7.0036	0.010049	0.030909	0.999379	617	2	7.0036
Mier3	4	0.79832	0.78177	0.963641	15386	0	4.4568	0.010063	0.044362	0.999379	618	3	4.4568
Mstn	4	0.66501	0.66755	0.962274	13117	1	2.3935	0.010076	0.044362	0.999379	619	3	2.3935
Cxcl16	4	0.98379	0.9755	0.994516	18890	0	4.5107	0.010099	0.044363	0.999379	620	4	4.5107
Mdga1	3	0.98988	0.98907	0.998588	19018	0	4.0745	0.01012	0.031201	0.999379	621	3	4.0745
Vmn1r2	2	0.66778	0.64381	0.959222	13148	0	4.3179	0.010132	0.021238	0.999379	622	1	4.3179
Sprr2a2	4	0.3975	0.51804	0.945217	9780	1	1.3307	0.010133	0.044564	0.999379	623	2	1.3307
Keg1	4	0.75188	0.73586	0.962274	14511	1	4.9655	0.010164	0.044885	0.999379	624	3	4.9655
Asb10	4	0.98982	0.98532	0.997755	19017	0	3.7915	0.010177	0.044885	0.999379	625	4	3.7915
Nqo2	4	0.97078	0.95908	0.990638	18644	0	4.5964	0.010185	0.044885	0.999379	626	4	4.5964
Olfr572	4	0.64642	0.65356	0.962274	12853	1	4.1478	0.010188	0.044885	0.999379	627	3	4.1478
Slc1a6	4	0.64212	0.64521	0.959222	12792	1	4.0067	0.01019	0.045055	0.999379	628	3	4.0067
Msantd2	3	0.53614	0.53204	0.945217	11318	1	3.0147	0.010231	0.031514	0.999379	629	2	3.0147
Synb	4	0.98976	0.98494	0.997435	19016	0	4.6784	0.010238	0.045215	0.999379	630	4	4.6784
Smyd2	4	0.72667	0.72189	0.962274	14075	1	1.5791	0.010248	0.04538	0.999379	631	2	1.5791
Erich1	4	0.98974	0.98494	0.997435	19015	0	2.91	0.010263	0.04538	0.999379	632	4	2.91
Gm21975	4	0.98973	0.98494	0.997435	19014	0	3.0171	0.010266	0.04538	0.999379	633	4	3.0171
Hes2	3	0.43458	0.4666	0.945217	10159	1	5.4799	0.010281	0.031654	0.999379	634	2	5.4799
Nme6	4	0.64647	0.65356	0.962274	12854	1	2.6373	0.010305	0.045541	0.999379	635	2	2.6373
Gstm6	4	0.78664	0.76242	0.963641	15180	1	3.9464	0.010308	0.045541	0.999379	636	3	3.9464
A430005L14Rik	4	0.9893	0.98421	0.997285	19004	0	4.9536	0.010312	0.045542	0.999379	637	4	4.9536
Chil3	4	0.19358	0.30476	0.945217	5878	1	5.1153	0.01032	0.045723	0.999379	638	3	5.1153
Cyth4	4	0.98967	0.98476	0.997435	19013	0	2.5397	0.010326	0.045723	0.999379	639	4	2.5397
Tmsb15b1	3	0.88137	0.85227	0.967491	16994	0	5.5141	0.010369	0.031655	0.999379	640	3	5.5141
Efcab1	4	0.3658	0.48974	0.945217	9268	2	2.7006	0.010394	0.04602	0.999379	641	2	2.7006
Slc22a12	4	0.82451	0.79935	0.963641	15919	0	3.9672	0.010404	0.046021	0.999379	642	3	3.9672
Smad5	4	0.070436	0.13702	0.838017	2914	2	-1.7257	0.010419	0.046021	0.999379	643	1	-1.7257
Zbtb12	4	0.98956	0.98441	0.997311	19012	0	2.5124	0.010435	0.046021	0.999379	644	4	2.5124
Chdh	4	0.98956	0.98441	0.997311	19011	0	2.2903	0.010442	0.046021	0.999379	645	4	2.2903
Tnfsf11	3	0.98948	0.98859	0.998588	19010	0	3.3848	0.010521	0.032241	0.999379	646	3	3.3848
Olfr1448	4	0.92732	0.90508	0.976781	17843	0	2.1205	0.010534	0.046695	0.999379	647	3	2.1205
Olfr103	3	0.98946	0.98859	0.998588	19009	0	3.6984	0.010536	0.032241	0.999379	648	3	3.6984
Otud3	4	0.98944	0.98421	0.997285	19007	0	2.7171	0.010559	0.046695	0.999379	649	4	2.7171
Olfr346	3	0.8222	0.79795	0.963641	15875	0	0.47329	0.010574	0.032241	0.999379	650	1	0.47329
Ambp	4	0.98943	0.98421	0.997285	19006	0	3.065	0.010574	0.046695	0.999379	651	4	3.065
Nkx6-2	4	0.085331	0.15747	0.848976	3377	1	2.2602	0.010591	0.046695	0.999379	652	3	2.2602
Tmem260	4	0.41902	0.52506	0.945217	9995	1	4.2903	0.010608	0.046696	0.999379	653	3	4.2903
Pcdh15	4	0.98846	0.98284	0.997143	18989	0	4.0663	0.010612	0.046696	0.999379	654	4	4.0663
Kcnmb4	4	0.89006	0.87375	0.97356	17157	0	4.1347	0.010619	0.046696	0.999379	655	3	4.1347
Rimklb	4	0.44197	0.5342	0.945217	10229	1	5.1114	0.01063	0.046696	0.999379	656	3	5.1114
Igsf8	4	0.11756	0.20279	0.876997	4257	1	3.4586	0.010648	0.046696	0.999379	657	3	3.4586
Olfr1412	4	0.71229	0.70942	0.962274	13843	1	2.6881	0.010667	0.046696	0.999379	658	2	2.6881
Sult1d1	4	0.14037	0.23108	0.906649	4753	2	-0.59279	0.010705	0.046696	0.999379	659	1	-0.59279
Trim3	3	0.98926	0.98841	0.998588	19003	0	3.0959	0.010739	0.032401	0.999379	660	3	3.0959
Vmn1r117	4	0.034947	0.077366	0.803581	1657	1	2.4194	0.010762	0.046861	0.999379	661	3	2.4194
Gm973	2	0.36657	0.36497	0.945217	9281	1	3.8342	0.010762	0.021659	0.999379	662	1	3.8342
Rcan1	4	0.98923	0.98403	0.997285	19002	0	3.8212	0.010767	0.046861	0.999379	663	4	3.8212
Rab2a	4	0.98923	0.98403	0.997285	19001	0	3.5162	0.010771	0.046861	0.999379	664	4	3.5162
Sdf2l1	4	0.36094	0.48436	0.945217	9165	2	2.7374	0.010777	0.046861	0.999379	665	2	2.7374
Pip5k1c	4	0.4494	0.53697	0.945217	10308	1	4.7794	0.010805	0.046861	0.999379	666	3	4.7794
Pbrm1	4	0.63183	0.63826	0.956086	12647	1	5.0784	0.010818	0.046861	0.999379	667	3	5.0784
Astl	4	0.98918	0.98403	0.997285	19000	0	2.5524	0.010819	0.046861	0.999379	668	4	2.5524
Pnmal1	4	0.97143	0.9598	0.990638	18661	0	3.9421	0.010832	0.046861	0.999379	669	4	3.9421
Lipg	4	0.25397	0.37769	0.945217	7169	2	2.3561	0.010853	0.046861	0.999379	670	2	2.3561
Cebpa	4	0.60558	0.62433	0.956086	12248	1	0.33703	0.010877	0.047035	0.999379	671	2	0.33703
Lysmd4	4	0.90704	0.8882	0.97356	17470	0	4.8629	0.010889	0.047208	0.999379	672	3	4.8629
Drp2	4	0.29332	0.42389	0.945217	7949	1	5.7844	0.010892	0.047208	0.999379	673	3	5.7844
Il12rb2	4	0.92178	0.89768	0.97356	17708	0	3.8748	0.010909	0.047208	0.999379	674	3	3.8748
Ubd	3	0.98909	0.98809	0.998541	18999	0	3.7767	0.010913	0.032685	0.999379	675	3	3.7767
Syf2	4	0.96575	0.95177	0.987706	18555	0	4.5006	0.010933	0.047727	0.999379	676	4	4.5006
Slc16a3	4	0.48853	0.55294	0.945217	10766	1	-0.33877	0.010934	0.047727	0.999379	677	2	-0.33877
Abca15	4	0.36654	0.4903	0.945217	9280	1	3.839	0.010954	0.047727	0.999379	678	3	3.839
Exph5	4	0.95904	0.94446	0.986763	18425	0	1.4309	0.010991	0.047727	0.999379	679	4	1.4309
Zfp235	4	0.52924	0.58387	0.956086	11256	1	4.8854	0.011001	0.047727	0.999379	680	3	4.8854
Pappa2	4	0.42671	0.52645	0.945217	10081	1	4.5428	0.011017	0.047727	0.999379	681	3	4.5428
Tm7sf3	4	0.98467	0.97704	0.995142	18907	0	4.4168	0.011036	0.047727	0.999379	682	4	4.4168
Olfr823	4	0.90337	0.88404	0.97356	17395	0	3.2325	0.011055	0.047727	0.999379	683	2	3.2325
Olfr1086	3	0.96811	0.95804	0.990638	18598	0	6.0068	0.011057	0.03285	0.999379	684	3	6.0068
Gjb5	4	0.61739	0.6299	0.956086	12421	1	4.3884	0.011062	0.047893	0.999379	685	3	4.3884
Akap8l	4	0.84133	0.81728	0.963641	16249	0	3.5181	0.01109	0.047894	0.999379	686	2	3.5181
Laptm4a	4	0.62024	0.63408	0.956086	12455	1	1.0321	0.011105	0.048368	0.999379	687	2	1.0321
Gbx1	4	0.96388	0.95046	0.987706	18516	0	4.6993	0.011118	0.048368	0.999379	688	4	4.6993
Pspc1	4	0.94408	0.92606	0.980458	18170	0	4.6762	0.011121	0.048368	0.999379	689	4	4.6762
Cfap53	4	0.91922	0.89691	0.97356	17686	0	4.2883	0.011132	0.048541	0.999379	690	3	4.2883
Tom1	4	0.062371	0.12185	0.826231	2651	2	-1.3678	0.011162	0.048541	0.999379	691	1	-1.3678
Ercc4	2	0.78628	0.75487	0.962274	15166	0	4.3114	0.011164	0.022355	0.999379	692	2	4.3114
G0s2	4	0.47761	0.54808	0.945217	10627	1	5.372	0.011174	0.048541	0.999379	693	3	5.372
Kcna5	4	0.94072	0.91998	0.978771	18106	0	3.8033	0.011195	0.048541	0.999379	694	4	3.8033
Bri3	4	0.98875	0.98324	0.997185	18998	0	3.1109	0.011249	0.048541	0.999379	695	4	3.1109
Llph	2	0.37796	0.37152	0.945217	9477	1	3.8897	0.01125	0.022835	0.999379	696	1	3.8897
Eps8l2	4	0.73781	0.73024	0.962274	14280	1	4.3887	0.011277	0.048721	0.999379	697	3	4.3887
Birc6	4	0.98871	0.98304	0.997143	18996	0	1.2686	0.011295	0.048721	0.999379	698	4	1.2686
BC027072	4	0.94139	0.9212	0.9791	18122	0	4.9604	0.011308	0.048721	0.999379	699	4	4.9604
Cdh7	4	0.98869	0.98304	0.997143	18995	0	3.3356	0.011315	0.048721	0.999379	700	4	3.3356
Olfr1323	4	0.97345	0.96317	0.992256	18696	0	3.9882	0.011334	0.048721	0.999379	701	4	3.9882
Klrd1	4	0.98866	0.98304	0.997143	18994	0	2.6653	0.011337	0.048721	0.999379	702	4	2.6653
Larp1b	3	0.42535	0.46208	0.945217	10057	1	1.8423	0.011346	0.033902	0.999379	703	2	1.8423
Neurod6	4	0.98864	0.98304	0.997143	18993	0	3.1595	0.01136	0.048721	0.999379	704	4	3.1595
G3bp1	4	0.98863	0.98304	0.997143	18992	0	3.8741	0.011367	0.048721	0.999379	705	4	3.8741
Tnfsf4	4	0.98859	0.98304	0.997143	18991	0	2.4646	0.011412	0.048901	0.999379	706	4	2.4646
Itpk1	4	0.7681	0.74567	0.962274	14824	1	0.65806	0.011448	0.048902	0.999379	707	2	0.65806
Mccc1	4	0.84051	0.81728	0.963641	16237	0	5.0298	0.0115	0.049077	0.999379	708	3	5.0298
Antxr2	4	0.9885	0.98284	0.997143	18990	0	2.8447	0.011502	0.049077	0.999379	709	4	2.8447
Kcnc4	4	0.96736	0.95265	0.987706	18581	0	5.0276	0.011505	0.049077	0.999379	710	4	5.0276
Mobp	4	0.22105	0.33843	0.945217	6425	1	4.6172	0.011536	0.049077	0.999379	711	3	4.6172
Defa22	4	0.92716	0.90508	0.976781	17839	0	4.4439	0.011542	0.049077	0.999379	712	3	4.4439
Ston2	4	0.21691	0.33475	0.945217	6345	1	2.591	0.011562	0.049077	0.999379	713	2	2.591
Ubap1l	4	0.98839	0.98284	0.997143	18988	0	3.2481	0.01161	0.049077	0.999379	714	4	3.2481
Olfr218	4	0.98838	0.98284	0.997143	18987	0	2.7716	0.011616	0.049077	0.999379	715	4	2.7716
C87977	4	0.64631	0.65356	0.962274	12851	1	2.4506	0.011619	0.049077	0.999379	716	2	2.4506
Tcl1b4	4	0.98837	0.98284	0.997143	18986	0	3.1453	0.011626	0.049077	0.999379	717	4	3.1453
Trp53	4	0.98837	0.98284	0.997143	18985	0	2.2374	0.01163	0.049077	0.999379	718	4	2.2374
Tecrl	4	0.98836	0.98284	0.997143	18984	0	2.4391	0.011642	0.049077	0.999379	719	4	2.4391
Abi3bp	3	0.69905	0.68034	0.962274	13607	0	0.27818	0.011647	0.034518	0.999379	720	1	0.27818
Fam227b	4	0.66663	0.67175	0.962274	13133	1	4.0776	0.011652	0.049077	0.999379	721	3	4.0776
Fubp3	4	0.98833	0.98284	0.997143	18983	0	3.2122	0.011667	0.049077	0.999379	722	4	3.2122
Klra3	4	0.15542	0.24985	0.914062	5075	2	2.798	0.01167	0.049077	0.999379	723	2	2.798
Oit3	4	0.0047174	0.010327	0.629886	290	1	2.421	0.011677	0.049077	0.999379	724	3	2.421
Pink1	4	0.14967	0.24312	0.914062	4948	1	4.1464	0.011681	0.049077	0.999379	725	3	4.1464
Edem2	4	0.96274	0.94826	0.98759	18495	0	1.669	0.011734	0.049253	0.999379	726	4	1.669
Emp3	3	0.075741	0.12692	0.838017	3093	1	5.1443	0.011746	0.034991	0.999379	727	2	5.1443
Gna15	4	0.98824	0.98264	0.997143	18982	0	3.0898	0.011763	0.049253	0.999379	728	4	3.0898
Atp2b2	3	0.34534	0.40905	0.945217	8877	1	1.1444	0.011775	0.03512	0.999379	729	2	1.1444
Myl3	4	0.72158	0.71493	0.962274	13978	1	5.3156	0.011776	0.049253	0.999379	730	3	5.3156
Aco1	3	0.98822	0.98706	0.998414	18981	0	4.0687	0.011783	0.03512	0.999379	731	3	4.0687
Gpr142	3	0.98817	0.98671	0.998176	18980	0	3.2858	0.011832	0.035417	0.999379	732	3	3.2858
Hemgn	4	0.26242	0.38352	0.945217	7296	1	2.6334	0.011848	0.049579	0.999379	733	3	2.6334
Dot1l	2	0.12235	0.18981	0.876997	4355	1	3.8152	0.011851	0.023078	0.999379	734	1	3.8152
Lrrc61	3	0.79735	0.76348	0.963641	15327	0	6.4147	0.011855	0.035417	0.999379	735	2	6.4147
Cadm1	4	0.27461	0.40125	0.945217	7571	1	2.8299	0.011872	0.049579	0.999379	736	2	2.8299
Helq	4	0.56567	0.60423	0.956086	11749	1	4.8638	0.011874	0.049579	0.999379	737	3	4.8638
Ndufb9	1	0.98808	0.98958	0.998588	18979	0	8.8045	0.011923	0.010424	0.999379	738	1	8.8045
Pla2g12a	3	0.95787	0.94323	0.986337	18401	0	5.2006	0.011938	0.035417	0.999379	739	3	5.2006
Fkbp14	4	0.56567	0.60423	0.956086	11769	1	0.47118	0.011962	0.049753	0.999379	740	2	0.47118
Ankrd28	4	0.78664	0.76242	0.963641	15171	1	5.0214	0.01198	0.049754	0.999379	741	3	5.0214
C2cd4a	4	0.92178	0.89768	0.97356	17744	0	4.3113	0.012024	0.05029	0.999379	742	3	4.3113
Npm2	4	0.78064	0.75402	0.962274	15027	1	4.8727	0.012099	0.05029	0.999379	743	3	4.8727
Eef1d	3	0.033257	0.067983	0.803581	1596	2	-2.4898	0.012118	0.035729	0.999379	744	1	-2.4898
Fnip1	4	0.98787	0.98244	0.997143	18978	0	2.6282	0.01213	0.05029	0.999379	745	4	2.6282
Ik	3	0.4828	0.50005	0.945217	10682	1	6.3804	0.012158	0.03573	0.999379	746	2	6.3804
Bend3	4	0.088776	0.16631	0.848976	3511	1	5.1203	0.012159	0.05029	0.999379	747	3	5.1203
Olfr6	4	0.98783	0.98244	0.997143	18977	0	3.2861	0.012174	0.05029	0.999379	748	4	3.2861
Hps1	4	0.56567	0.60423	0.956086	11736	1	0.81325	0.012191	0.05029	0.999379	749	2	0.81325
Pcdhb9	4	0.98781	0.98244	0.997143	18976	0	2.3559	0.012191	0.05029	0.999379	750	4	2.3559
Fam57b	3	0.98781	0.98619	0.997966	18975	0	5.2387	0.012192	0.03588	0.999379	751	3	5.2387
Nudcd1	4	0.9878	0.98244	0.997143	18974	0	4.3717	0.012204	0.05029	0.999379	752	4	4.3717
Gm5168	3	0.41368	0.44848	0.945217	9952	1	3.0518	0.012204	0.03588	0.999379	753	2	3.0518
Gm17455	4	0.7319	0.72467	0.962274	14171	1	4.5531	0.012206	0.05029	0.999379	754	3	4.5531
Hoxa5	4	0.98779	0.98244	0.997143	18973	0	3.0985	0.012212	0.05029	0.999379	755	4	3.0985
Dbn1	4	0.92178	0.89768	0.97356	17761	0	5.0478	0.012213	0.05029	0.999379	756	3	5.0478
Colgalt1	4	0.38713	0.51171	0.945217	9655	1	5.7168	0.012213	0.05029	0.999379	757	3	5.7168
Zbtb16	3	0.47611	0.49543	0.945217	10605	1	6.1138	0.012242	0.035881	0.999379	758	2	6.1138
Map3k14	4	0.79304	0.77632	0.963641	15278	0	5.026	0.012248	0.050477	0.999379	759	3	5.026
Lsm8	1	0.98775	0.98958	0.998588	18972	0	8.1852	0.012254	0.010424	0.999379	760	1	8.1852
Plekhm2	4	0.98406	0.97578	0.994641	18895	0	4.206	0.012297	0.050816	0.999379	761	4	4.206
4930564D02Rik	4	0.98769	0.98222	0.997143	18971	0	3.756	0.012308	0.050816	0.999379	762	4	3.756
Snx1	4	0.72014	0.71493	0.962274	13924	1	4.0509	0.012334	0.050987	0.999379	763	3	4.0509
Fam43b	4	0.72654	0.72189	0.962274	14071	1	4.4422	0.012419	0.050987	0.999379	764	3	4.4422
Ier3ip1	4	0.74225	0.73165	0.962274	14371	1	1.0941	0.012419	0.050987	0.999379	765	2	1.0941
Stmn3	4	0.98755	0.98201	0.997143	18970	0	2.1868	0.012451	0.050987	0.999379	766	4	2.1868
Ttc39b	4	0.84623	0.82196	0.96423	16340	0	4.4046	0.012456	0.050987	0.999379	767	3	4.4046
Art5	3	0.75428	0.72511	0.962274	14558	0	0.82626	0.012461	0.036054	0.999379	768	2	0.82626
Noto	4	0.7638	0.74353	0.962274	14729	1	0.68397	0.012476	0.050987	0.999379	769	2	0.68397
Fhod1	4	0.91752	0.89457	0.97356	17656	0	4.7738	0.012485	0.050987	0.999379	770	3	4.7738
Plac9a	4	0.98751	0.98201	0.997143	18969	0	3.6923	0.012492	0.050987	0.999379	771	4	3.6923
Rnf183	4	0.06292	0.12185	0.826231	2665	1	3.0358	0.012493	0.050987	0.999379	772	2	3.0358
Cyp2c65	4	0.98437	0.97628	0.994737	18901	0	5.3636	0.012515	0.050987	0.999379	773	4	5.3636
Ssc5d	4	0.89006	0.87375	0.97356	17158	0	0.33451	0.012533	0.050987	0.999379	774	1	0.33451
Myl1	4	0.98745	0.98201	0.997143	18968	0	2.9578	0.012547	0.050987	0.999379	775	4	2.9578
Scly	4	0.98436	0.97628	0.994737	18900	0	5.3041	0.012582	0.050987	0.999379	776	4	5.3041
Srrd	1	0.98741	0.98958	0.998588	18966	0	7.6085	0.012585	0.010424	0.999379	777	1	7.6085
Mettl8	4	0.7921	0.77632	0.963641	15263	0	3.3192	0.01259	0.051172	0.999379	778	2	3.3192
Asic3	4	0.97976	0.96915	0.99247	18815	0	5.3089	0.012598	0.051172	0.999379	779	4	5.3089
Il19	4	0.98739	0.9818	0.997143	18965	0	3.6051	0.012613	0.051172	0.999379	780	4	3.6051
Kdm8	3	0.69905	0.68034	0.962274	13584	0	6.0637	0.01262	0.036222	0.999379	781	2	6.0637
Gm156	4	0.98737	0.9818	0.997143	18964	0	3.1016	0.012628	0.051173	0.999379	782	4	3.1016
Mageb16	4	0.89792	0.88153	0.97356	17302	0	2.7062	0.012647	0.051344	0.999379	783	3	2.7062
2410131K14Rik	2	0.76131	0.72377	0.962274	14669	0	4.5454	0.012653	0.02403	0.999379	784	2	4.5454
Ephx4	4	0.12814	0.21869	0.902377	4493	1	4.139	0.012693	0.051535	0.999379	785	3	4.139
AB124611	4	0.87991	0.85398	0.967491	16968	0	3.5499	0.012723	0.051719	0.999379	786	3	3.5499
Slc16a7	4	0.62459	0.63408	0.956086	12525	1	4.7095	0.012728	0.051884	0.999379	787	3	4.7095
Ttc7	3	0.98726	0.98563	0.997755	18963	0	5.2298	0.012738	0.036388	0.999379	788	3	5.2298
G6pc3	4	0.89457	0.87813	0.97356	17252	0	4.8837	0.012756	0.052086	0.999379	789	3	4.8837
Cyba	4	0.58076	0.61468	0.956086	11958	1	1.7159	0.012762	0.052418	0.999379	790	3	1.7159
Nanos2	4	0.98171	0.97247	0.993379	18855	0	5.3313	0.01278	0.052418	0.999379	791	4	5.3313
Olfr860	4	0.27461	0.40125	0.945217	7581	1	4.3828	0.012813	0.052419	0.999379	792	3	4.3828
Zscan10	4	0.98505	0.97751	0.9952	18919	0	2.8754	0.012863	0.0526	0.999379	793	4	2.8754
Gm5460	4	0.98258	0.97359	0.993783	18867	0	4.6058	0.012873	0.0526	0.999379	794	4	4.6058
Ube2v2	3	0.5953	0.58611	0.956086	12116	1	6.6577	0.012905	0.03708	0.999379	795	2	6.6577
Lgals7	4	0.98709	0.98078	0.996676	18961	0	4.5995	0.012915	0.0526	0.999379	796	4	4.5995
Cldn2	4	0.90244	0.88404	0.97356	17383	0	4.4808	0.012946	0.052795	0.999379	797	3	4.4808
Arap2	4	0.98563	0.97851	0.995636	18935	0	4.441	0.012967	0.052796	0.999379	798	4	4.441
Ddx28	2	0.20304	0.2453	0.914062	6058	1	3.7869	0.012968	0.02637	0.999379	799	1	3.7869
Cracr2a	3	0.56019	0.55648	0.949788	11679	1	2.3191	0.012975	0.037411	0.999379	800	2	2.3191
Mapk15	4	0.36211	0.48436	0.945217	9185	1	2.6629	0.012978	0.052796	0.999379	801	2	2.6629
Dock6	4	0.98701	0.98055	0.996608	18960	0	2.2717	0.012988	0.052796	0.999379	802	4	2.2717
Sox4	4	0.80808	0.78977	0.963641	15586	0	3.5349	0.012995	0.052796	0.999379	803	3	3.5349
Atp6v0e	4	0.97866	0.96787	0.992256	18798	0	3.9532	0.013016	0.053183	0.999379	804	4	3.9532
Phf21a	4	0.053222	0.10448	0.811199	2353	1	0.30903	0.013047	0.053184	0.999379	805	2	0.30903
H3f3a	2	0.46875	0.46078	0.945217	10522	1	3.6093	0.013083	0.02637	0.999379	806	1	3.6093
Vcl	4	0.60327	0.62362	0.956086	12235	1	0.97117	0.013104	0.053522	0.999379	807	3	0.97117
Sh3tc2	3	0.93101	0.91032	0.977947	17913	0	1.6143	0.013104	0.037729	0.999379	808	3	1.6143
Rhox11	4	0.98687	0.98033	0.996434	18958	0	3.4518	0.013133	0.053522	0.999379	809	4	3.4518
Wnt16	4	0.98687	0.98033	0.996434	18959	0	3.767	0.013133	0.053522	0.999379	810	4	3.767
Ttc24	4	0.98687	0.98033	0.996434	18957	0	4.2297	0.013133	0.053522	0.999379	811	4	4.2297
Dmrtc2	4	0.98687	0.98033	0.996434	18956	0	2.5144	0.013133	0.053522	0.999379	812	4	2.5144
Parvb	4	0.20766	0.32528	0.945217	6167	1	4.452	0.013141	0.053522	0.999379	813	3	4.452
Arid2	4	0.95937	0.94446	0.986763	18432	0	4.8693	0.013169	0.053522	0.999379	814	4	4.8693
Gck	4	0.97812	0.96787	0.992256	18787	0	3.9479	0.013205	0.053892	0.999379	815	4	3.9479
Csnk2a1	4	0.88373	0.86181	0.971738	17032	0	2.6775	0.013226	0.053892	0.999379	816	3	2.6775
Specc1l	2	0.23373	0.26129	0.925879	6683	1	2.5987	0.013254	0.02637	0.999379	817	1	2.5987
Vapa	3	0.32923	0.39842	0.945217	8562	1	5.7252	0.013259	0.038081	0.999379	818	2	5.7252
Zcchc3	3	0.98673	0.98485	0.997435	18954	0	3.1573	0.013267	0.038081	0.999379	819	3	3.1573
Olfr521	4	0.79832	0.78177	0.963641	15411	0	0.88118	0.013275	0.053892	0.999379	820	2	0.88118
Plcxd1	4	0.45388	0.53903	0.945217	10358	1	3.209	0.013288	0.053892	0.999379	821	2	3.209
Olfr293	4	0.28073	0.40792	0.945217	7693	1	4.3359	0.013296	0.053892	0.999379	822	3	4.3359
Gal	3	0.98651	0.98467	0.997435	18949	0	5.6048	0.013314	0.038418	0.999379	823	3	5.6048
Magea3	3	0.98668	0.98485	0.997435	18953	0	4.5062	0.01332	0.038418	0.999379	824	3	4.5062
Agpat3	4	0.50926	0.56834	0.955875	10980	1	2.6718	0.013332	0.054086	0.999379	825	2	2.6718
Tomm7	4	0.80612	0.78587	0.963641	15549	0	3.3561	0.013349	0.054274	0.999379	826	2	3.3561
Gm11487	4	0.57579	0.61051	0.956086	11882	1	-0.14037	0.013389	0.054275	0.999379	827	1	-0.14037
Evx1	4	0.9866	0.97989	0.996405	18952	0	3.2949	0.013398	0.054468	0.999379	828	4	3.2949
Ap5b1	4	0.93251	0.91138	0.977947	17941	0	4.5798	0.01341	0.054468	0.999379	829	3	4.5798
Comp	3	0.98659	0.98467	0.997435	18951	0	5.1528	0.013415	0.038918	0.999379	830	3	5.1528
Mrgprh	4	0.94263	0.92242	0.979363	18140	0	4.1157	0.013424	0.054468	0.999379	831	4	4.1157
Nmt1	4	0.98657	0.97989	0.996405	18950	0	2.1134	0.013426	0.054468	0.999379	832	4	2.1134
Slco1a6	3	0.20105	0.30567	0.945217	6043	1	6.2704	0.01344	0.038918	0.999379	833	2	6.2704
Clip1	4	0.93011	0.90861	0.977646	17895	0	1.69	0.013446	0.054468	0.999379	834	3	1.69
Prps2	4	0.074541	0.14026	0.838017	3041	3	-1.2983	0.013503	0.054468	0.999379	835	1	-1.2983
Ppm1m	4	0.98648	0.97989	0.996405	18948	0	3.4057	0.013524	0.054468	0.999379	836	4	3.4057
Mab21l3	3	0.45066	0.47797	0.945217	10335	1	5.1372	0.013545	0.038919	0.999379	837	2	5.1372
Gm9994	4	0.3512	0.47408	0.945217	8971	1	4.7464	0.013548	0.054468	0.999379	838	3	4.7464
Sema3a	4	0.98644	0.97989	0.996405	18947	0	3.3721	0.01356	0.054468	0.999379	839	4	3.3721
Zcchc10	4	0.29332	0.42389	0.945217	7942	2	0.53548	0.01356	0.054468	0.999379	840	2	0.53548
Tysnd1	4	0.22151	0.33843	0.945217	6430	2	2.5867	0.013579	0.054468	0.999379	841	2	2.5867
Fam20b	4	0.89904	0.88153	0.97356	17323	0	3.6418	0.013602	0.054856	0.999379	842	3	3.6418
Igsf23	4	0.88156	0.85699	0.969995	16998	0	4.3747	0.013606	0.054856	0.999379	843	3	4.3747
Sugct	4	0.4372	0.5335	0.945217	10174	1	4.5774	0.013663	0.055228	0.999379	844	3	4.5774
Scn5a	4	0.74225	0.73165	0.962274	14312	1	-0.21125	0.013675	0.055228	0.999379	845	1	-0.21125
Iah1	3	0.92168	0.89784	0.973567	17702	0	2.4985	0.013704	0.039257	0.999379	846	3	2.4985
Arhgef6	4	0.87769	0.85095	0.967425	16916	0	1.6118	0.013732	0.055416	0.999379	847	3	1.6118
Ahrr	4	0.076893	0.1473	0.848976	3112	1	4.6382	0.013772	0.055416	0.999379	848	3	4.6382
R3hdml	3	0.98621	0.98428	0.997285	18945	0	4.1515	0.013792	0.039258	0.999379	849	3	4.1515
Phc2	4	0.98619	0.97944	0.996314	18944	0	3.5662	0.013809	0.055416	0.999379	850	4	3.5662
Hmgcll1	4	0.8807	0.85398	0.967491	16983	0	4.7803	0.013818	0.055416	0.999379	851	3	4.7803
Zik1	4	0.79832	0.78177	0.963641	15378	0	4.1793	0.013825	0.055416	0.999379	852	3	4.1793
Tal2	4	0.50926	0.56834	0.955875	10979	1	1.0394	0.013846	0.055416	0.999379	853	2	1.0394
Scg2	4	0.71229	0.70942	0.962274	13781	1	3.9492	0.013872	0.055416	0.999379	854	3	3.9492
Asb14	3	0.26041	0.36193	0.945217	7273	1	3.7104	0.013875	0.039611	0.999379	855	2	3.7104
Def8	3	0.82271	0.79795	0.963641	15891	0	6.0008	0.013913	0.040133	0.999379	856	2	6.0008
Pgpep1	4	0.98607	0.97933	0.996307	18943	0	3.7532	0.013934	0.055514	0.999379	857	4	3.7532
Nipal2	4	0.28412	0.41275	0.945217	7744	1	1.7328	0.01396	0.055611	0.999379	858	2	1.7328
Cyp3a16	4	0.08657	0.16238	0.848976	3456	1	4.565	0.014044	0.056221	0.999379	859	3	4.565
Zc3h12c	4	0.96541	0.95177	0.987706	18547	0	4.8263	0.014066	0.056221	0.999379	860	4	4.8263
Pcsk7	4	0.88963	0.87331	0.97356	17153	0	4.2823	0.014077	0.056221	0.999379	861	3	4.2823
Siah3	4	0.98591	0.97897	0.995997	18942	0	3.3452	0.01409	0.056432	0.999379	862	4	3.3452
Hist1h4c	2	0.56616	0.54099	0.945217	11775	0	4.1136	0.014113	0.029232	0.999379	863	1	4.1136
S100a13	3	0.98588	0.9837	0.997285	18941	0	2.9269	0.014117	0.040477	0.999379	864	3	2.9269
Zfp180	4	0.16347	0.26083	0.925098	5272	1	3.3532	0.014131	0.056432	0.999379	865	3	3.3532
Olfr887	4	0.93711	0.91579	0.978589	18029	0	4.3004	0.014161	0.056636	0.999379	866	3	4.3004
Sema3d	3	0.98583	0.9837	0.997285	18940	0	2.9685	0.014166	0.040477	0.999379	867	3	2.9685
Scgb1a1	3	0.98582	0.9837	0.997285	18939	0	5.365	0.014176	0.040477	0.999379	868	3	5.365
Cptp	4	0.66919	0.6738	0.962274	13163	1	3.5508	0.014177	0.056636	0.999379	869	2	3.5508
Cby1	4	0.67562	0.67727	0.962274	13252	1	0.096374	0.014188	0.056636	0.999379	870	2	0.096374
Nov	4	0.23498	0.35652	0.945217	6727	1	3.3668	0.014208	0.056636	0.999379	871	2	3.3668
Cdc34	3	0.80146	0.77297	0.963641	15467	0	0.22472	0.014218	0.040477	0.999379	872	1	0.22472
Scn10a	4	0.8529	0.8298	0.965375	16486	0	4.2154	0.01424	0.056637	0.999379	873	3	4.2154
Fn1	4	0.059864	0.11519	0.820848	2556	2	2.0413	0.014245	0.056637	0.999379	874	2	2.0413
Armc10	4	0.86264	0.83733	0.966857	16633	0	5.0085	0.014279	0.056835	0.999379	875	3	5.0085
Bace2	3	0.95245	0.93436	0.983044	18328	0	6.4957	0.014297	0.040831	0.999379	876	3	6.4957
Pdlim2	4	0.18342	0.29705	0.945217	5689	2	-0.0011308	0.014302	0.056836	0.999379	877	2	-0.0011308
Olfr313	4	0.24668	0.37283	0.945217	6984	1	2.7563	0.014302	0.056836	0.999379	878	2	2.7563
Dido1	4	0.9857	0.97874	0.995811	18938	0	2.0655	0.014303	0.056836	0.999379	879	4	2.0655
Fbxw24	3	0.98567	0.9833	0.997185	18937	0	3.436	0.014333	0.040831	0.999379	880	3	3.436
Gm15097	3	0.96955	0.95954	0.990638	18622	0	2.5039	0.014346	0.040831	0.999379	881	3	2.5039
Olfr1329	4	0.98565	0.97851	0.995636	18936	0	1.7469	0.014353	0.057252	0.999379	882	4	1.7469
Panx3	4	0.73632	0.72743	0.962274	14258	1	0.96518	0.014359	0.057252	0.999379	883	3	0.96518
Gab3	3	0.98561	0.9833	0.997185	18934	0	2.7463	0.014394	0.040832	0.999379	884	3	2.7463
Wnt11	4	0.93336	0.91138	0.977947	17961	0	4.5639	0.014435	0.057474	0.999379	885	3	4.5639
Slc24a4	3	0.9855	0.9831	0.997143	18933	0	3.381	0.0145	0.041005	0.999379	886	3	3.381
Cib1	4	0.56151	0.60216	0.956086	11695	1	-0.45955	0.01453	0.057831	0.999379	887	2	-0.45955
Mmp11	4	0.6788	0.67869	0.962274	13304	1	3.694	0.014543	0.057831	0.999379	888	3	3.694
Bmpr1b	4	0.87412	0.84793	0.967185	16857	0	4.4002	0.014556	0.057831	0.999379	889	3	4.4002
2200002J24Rik	4	0.17078	0.26976	0.928713	5428	1	4.6988	0.014575	0.057831	0.999379	890	3	4.6988
Isg15	4	0.37074	0.49444	0.945217	9339	1	-0.72142	0.014587	0.057831	0.999379	891	1	-0.72142
Msi2	4	0.98539	0.97826	0.995483	18932	0	2.4792	0.014608	0.057832	0.999379	892	4	2.4792
H1foo	4	0.98538	0.97826	0.995483	18930	0	3.1686	0.014618	0.057832	0.999379	893	4	3.1686
Ldlrad1	4	0.98537	0.97826	0.995483	18929	0	2.9232	0.014625	0.057832	0.999379	894	4	2.9232
Fxyd7	4	0.93567	0.91478	0.978443	17999	0	3.7156	0.014667	0.057832	0.999379	895	3	3.7156
Fam171a2	2	0.63269	0.60299	0.956086	12664	0	4.4534	0.014685	0.030009	0.999379	896	1	4.4534
Spink7	4	0.21355	0.32917	0.945217	6248	1	4.3485	0.014689	0.057832	0.999379	897	3	4.3485
Pggt1b	4	0.24585	0.37098	0.945217	6973	2	0.15349	0.014701	0.057832	0.999379	898	2	0.15349
Casq1	4	0.21897	0.33754	0.945217	6363	1	4.1686	0.014712	0.057832	0.999379	899	3	4.1686
Ifna9	3	0.97328	0.96628	0.992256	18694	0	3.4359	0.014731	0.041344	0.999379	900	3	3.4359
Rhox9	4	0.98527	0.97826	0.995483	18928	0	3.8444	0.014735	0.057832	0.999379	901	4	3.8444
Esx1	4	0.35732	0.48285	0.945217	9110	1	2.503	0.014758	0.058249	0.999379	902	2	2.503
Dhx35	4	0.98524	0.97778	0.995258	18927	0	1.5279	0.014762	0.058249	0.999379	903	4	1.5279
Ccdc89	4	0.98522	0.97778	0.995258	18926	0	4.9847	0.014776	0.058249	0.999379	904	4	4.9847
Scrib	4	0.90341	0.88404	0.97356	17397	0	4.6333	0.014779	0.058249	0.999379	905	3	4.6333
Cebpb	4	0.90857	0.88902	0.97356	17495	0	3.9882	0.014815	0.058249	0.999379	906	3	3.9882
Pus7l	3	0.071798	0.11416	0.820848	2960	1	5.6316	0.014819	0.041345	0.999379	907	2	5.6316
Heatr3	2	0.98515	0.9827	0.997143	18925	0	5.9162	0.014854	0.03001	0.999379	908	2	5.9162
Pgrmc1	4	0.83498	0.80996	0.963641	16119	0	3.6305	0.01487	0.05825	0.999379	909	3	3.6305
Rrp8	4	0.0093323	0.02169	0.714107	559	2	-1.0428	0.014872	0.05825	0.999379	910	1	-1.0428
Zfp961	4	0.98512	0.97778	0.995258	18924	0	1.1339	0.014879	0.05825	0.999379	911	4	1.1339
Gabra3	3	0.98512	0.9831	0.997143	18923	0	3.4591	0.014883	0.043915	0.999379	912	3	3.4591
Fahd2a	4	0.97524	0.96491	0.992256	18733	0	3.7975	0.014924	0.05825	0.999379	913	4	3.7975
Zfp92	4	0.98506	0.97751	0.9952	18921	0	3.6867	0.014936	0.058476	0.999379	914	4	3.6867
Clec2g	3	0.88011	0.8496	0.967425	16972	0	5.8334	0.014946	0.044075	0.999379	915	3	5.8334
Slc35a5	4	0.0045164	0.010008	0.629886	280	1	4.5822	0.014955	0.058477	0.999379	916	3	4.5822
Actl6b	4	0.86531	0.84269	0.967185	16696	0	3.5355	0.014963	0.058477	0.999379	917	3	3.5355
Gjc2	4	0.89575	0.87983	0.97356	17273	0	3.7482	0.014988	0.05907	0.999379	918	3	3.7482
A630095N17Rik	4	0.69529	0.69123	0.962274	13528	1	3.8735	0.015003	0.05907	0.999379	919	3	3.8735
Vasp	4	0.37092	0.49594	0.945217	9366	2	3.1189	0.015052	0.05907	0.999379	920	2	3.1189
Zfp955b	2	0.98495	0.98215	0.997143	18917	0	6.7324	0.015053	0.03053	0.999379	921	2	6.7324
Rplp1	1	0.98494	0.98424	0.997285	18916	0	7.9213	0.015064	0.015761	0.999379	922	1	7.9213
Olfr1080	3	0.98491	0.98271	0.997143	18915	0	5.3657	0.015086	0.044257	0.999379	923	3	5.3657
Unc119b	4	0.92902	0.90723	0.977582	17872	0	4.2389	0.015095	0.05907	0.999379	924	3	4.2389
Tmpo	3	0.9849	0.98271	0.997143	18913	0	3.1191	0.015096	0.044257	0.999379	925	3	3.1191
Zfp53	4	0.87546	0.84996	0.967425	16868	0	3.6748	0.015116	0.05907	0.999379	926	3	3.6748
Gm7325	4	0.62114	0.63408	0.956086	12464	1	1.8323	0.015157	0.05907	0.999379	927	2	1.8323
Fam13c	4	0.98483	0.97751	0.9952	18912	0	2.5659	0.015173	0.05907	0.999379	928	4	2.5659
Vmn1r13	4	0.98482	0.97751	0.9952	18911	0	2.4755	0.015176	0.05907	0.999379	929	4	2.4755
Gpx5	3	0.98482	0.9825	0.997143	18910	0	4.3455	0.015183	0.04444	0.999379	930	3	4.3455
Cdk2ap2	3	0.90466	0.88103	0.97356	17426	0	2.6826	0.015202	0.04444	0.999379	931	3	2.6826
Hbegf	4	0.98479	0.97751	0.9952	18909	0	3.9641	0.015206	0.05907	0.999379	932	4	3.9641
Olfr154	4	0.96379	0.95046	0.987706	18514	0	4.1663	0.015238	0.05927	0.999379	933	4	4.1663
Sos1	4	0.98474	0.97704	0.995142	18908	0	2.1429	0.015258	0.059483	0.999379	934	4	2.1429
Vmn1r234	4	0.65352	0.65774	0.962274	12953	1	2.3848	0.015271	0.059483	0.999379	935	3	2.3848
Smtnl1	4	0.47761	0.54808	0.945217	10634	1	3.6646	0.015278	0.059483	0.999379	936	3	3.6646
Tnnc2	4	0.014074	0.035914	0.803581	776	1	1.5988	0.015328	0.059483	0.999379	937	3	1.5988
Pcid2	2	0.083435	0.12836	0.838017	3345	1	3.0571	0.015343	0.031071	0.999379	938	1	3.0571
Mapkbp1	4	0.98466	0.97704	0.995142	18906	0	3.3948	0.015344	0.059483	0.999379	939	4	3.3948
Olfr812	4	0.98456	0.97704	0.995142	18905	0	3.0113	0.015439	0.059483	0.999379	940	4	3.0113
Slc22a29	4	0.60327	0.62362	0.956086	12229	1	2.0487	0.015442	0.059862	0.999379	941	3	2.0487
Trim75	4	0.80494	0.78519	0.963641	15509	0	2.7961	0.015449	0.059862	0.999379	942	2	2.7961
Nr2c1	4	0.18417	0.29792	0.945217	5702	1	3.1517	0.015457	0.059862	0.999379	943	2	3.1517
Mc2r	3	0.23608	0.3416	0.945217	6741	2	-0.5687	0.015459	0.04604	0.999379	944	1	-0.5687
Igsf5	4	0.82235	0.79746	0.963641	15877	0	4.1145	0.015497	0.060473	0.999379	945	3	4.1145
Vrk3	4	0.98447	0.97654	0.994891	18904	0	3.8126	0.01553	0.0607	0.999379	946	4	3.8126
Pitpnm1	4	0.50854	0.56697	0.955227	10972	1	4.0931	0.015547	0.060917	0.999379	947	3	4.0931
Tmem74	4	0.2792	0.40588	0.945217	7655	1	4.2195	0.015549	0.060917	0.999379	948	3	4.2195
Rasl11a	4	0.37895	0.50053	0.945217	9497	1	3.4662	0.015555	0.060917	0.999379	949	3	3.4662
Prdm6	4	0.79358	0.77766	0.963641	15293	0	3.2876	0.015563	0.060917	0.999379	950	3	3.2876
Dguok	4	0.98441	0.97628	0.994737	18902	0	2.2499	0.015586	0.060917	0.999379	951	4	2.2499
Gdf15	3	0.03427	0.06916	0.803581	1630	2	-1.7604	0.015587	0.04641	0.999379	952	1	-1.7604
Cdk4	4	0.96301	0.94871	0.987706	18500	0	3.3525	0.015614	0.061301	0.999379	953	4	3.3525
Vopp1	4	0.66919	0.6738	0.962274	13170	1	3.6758	0.015661	0.061302	0.999379	954	3	3.6758
H2-T24	4	0.98433	0.97628	0.994737	18898	0	3.2388	0.015673	0.061302	0.999379	955	4	3.2388
Med1	3	0.78766	0.75499	0.962366	15195	0	1.7513	0.015715	0.046623	0.999379	956	2	1.7513
Ep400	4	0.69899	0.69402	0.962274	13572	1	4.4587	0.015719	0.061532	0.999379	957	3	4.4587
Mpp2	4	0.63183	0.63826	0.956086	12600	1	1.8671	0.015726	0.061532	0.999379	958	3	1.8671
Cst7	4	0.68547	0.68566	0.962274	13376	1	3.7375	0.015751	0.061532	0.999379	959	3	3.7375
Stk33	3	0.98423	0.98121	0.997062	18897	0	2.9462	0.015766	0.046623	0.999379	960	3	2.9462
Slc35f6	4	0.94347	0.92426	0.980074	18162	0	4.5737	0.015774	0.061532	0.999379	961	4	4.5737
Mtmr4	4	0.25107	0.37382	0.945217	7075	2	-0.23325	0.015783	0.061532	0.999379	962	2	-0.23325
Fam57a	3	0.41303	0.44698	0.945217	9948	1	-1.627	0.015801	0.046623	0.999379	963	1	-1.627
Repin1	3	0.92063	0.89717	0.97356	17695	0	5.4934	0.015822	0.046823	0.999379	964	3	5.4934
Spink5	4	0.68008	0.68009	0.962274	13323	1	5.2475	0.015826	0.061533	0.999379	965	3	5.2475
Mafk	4	0.84827	0.82309	0.96423	16376	0	3.1787	0.01584	0.061533	0.999379	966	3	3.1787
Casc3	3	0.8194	0.79795	0.963641	15852	0	5.55	0.015852	0.046823	0.999379	967	2	5.55
Olfr889	4	0.98414	0.97602	0.994737	18896	0	5.1129	0.015857	0.061533	0.999379	968	4	5.1129
Apoa5	4	0.12952	0.22223	0.906649	4523	2	1.4445	0.015897	0.061533	0.999379	969	2	1.4445
Igf2bp2	3	0.93514	0.91715	0.978608	17990	0	4.9546	0.015929	0.046824	0.999379	970	3	4.9546
Lmo4	4	0.53722	0.58737	0.956086	11346	1	4.3064	0.015944	0.061746	0.999379	971	3	4.3064
Acsl6	3	0.85982	0.82892	0.965375	16581	0	5.7825	0.015948	0.047192	0.999379	972	2	5.7825
Rhd	4	0.98401	0.97578	0.994641	18894	0	3.9921	0.015989	0.06236	0.999379	973	4	3.9921
Olfr1199	4	0.61307	0.62779	0.956086	12383	1	4.3248	0.015992	0.06236	0.999379	974	3	4.3248
Hdac4	4	0.98401	0.97578	0.994641	18893	0	3.405	0.015992	0.06236	0.999379	975	4	3.405
Crct1	4	0.35335	0.47812	0.945217	9019	2	0.24636	0.016011	0.06236	0.999379	976	2	0.24636
Cftr	3	0.83778	0.81073	0.963641	16173	0	2.8209	0.016015	0.047192	0.999379	977	2	2.8209
Obox5	3	0.021691	0.052772	0.803581	1115	1	5.7364	0.016056	0.047386	0.999379	978	2	5.7364
Dctn4	1	0.98394	0.98424	0.997285	18892	0	8.4156	0.016058	0.015761	0.999379	979	1	8.4156
Clec11a	4	0.94126	0.9212	0.9791	18119	0	3.8009	0.016058	0.062774	0.999379	980	4	3.8009
Dffa	4	0.48309	0.55017	0.945217	10703	1	-0.016769	0.016068	0.062774	0.999379	981	1	-0.016769
Tmem63c	3	0.98387	0.98075	0.996676	18891	0	2.7455	0.016133	0.047746	0.999379	982	3	2.7455
Capn12	4	0.7638	0.74353	0.962274	14702	1	4.4188	0.01615	0.062987	0.999379	983	3	4.4188
Cd300lf	4	0.57917	0.61332	0.956086	11910	1	4.3001	0.016151	0.062987	0.999379	984	3	4.3001
Tas2r143	4	0.97983	0.96915	0.99247	18816	0	4.0831	0.016163	0.063226	0.999379	985	4	4.0831
Adam17	4	0.89207	0.87599	0.97356	17201	0	3.8553	0.016182	0.063226	0.999379	986	3	3.8553
Mocs2	3	0.91749	0.89511	0.97356	17654	0	4.5308	0.016186	0.047746	0.999379	987	3	4.5308
Scml4	4	0.98039	0.9701	0.993009	18828	0	4.5359	0.016199	0.063226	0.999379	988	4	4.5359
Mib1	4	0.013703	0.035742	0.803581	759	1	3.7309	0.016219	0.063226	0.999379	989	3	3.7309
Olfr736	4	0.98376	0.9755	0.994516	18889	0	2.6877	0.016245	0.063226	0.999379	990	4	2.6877
Rnpc3	1	0.98376	0.98424	0.997285	18888	0	8.6245	0.016245	0.015761	0.999379	991	1	8.6245
Mad2l1	1	0.98373	0.98424	0.997285	18887	0	7.7433	0.016274	0.015761	0.999379	992	1	7.7433
Itgax	4	0.92572	0.90141	0.97513	17810	0	3.8091	0.016287	0.063445	0.999379	993	3	3.8091
Lrig3	4	0.194	0.30476	0.945217	5884	2	0.80312	0.016296	0.063644	0.999379	994	2	0.80312
Kcnu1	4	0.98369	0.97525	0.994415	18886	0	3.5281	0.016313	0.063644	0.999379	995	4	3.5281
Loh12cr1	3	0.78247	0.75309	0.962274	15073	0	0.34334	0.016314	0.047747	0.999379	996	2	0.34334
Evi2a	4	0.32855	0.4558	0.945217	8549	1	2.8216	0.016317	0.063644	0.999379	997	2	2.8216
Il9	4	0.98365	0.97525	0.994415	18885	0	1.8342	0.016347	0.063644	0.999379	998	4	1.8342
Commd7	4	0.7638	0.74353	0.962274	14707	1	5.546	0.016352	0.063644	0.999379	999	3	5.546
Slc25a4	4	0.64916	0.65774	0.962274	12895	1	1.8452	0.016353	0.063644	0.999379	1000	2	1.8452
Ppbp	2	0.89872	0.87675	0.97356	17318	0	4.7458	0.016372	0.032442	0.999379	1001	2	4.7458
Prss8	4	0.98362	0.97524	0.994415	18884	0	4.626	0.016379	0.063644	0.999379	1002	4	4.626
Prrc2b	4	0.98361	0.97524	0.994415	18883	0	2.8352	0.016395	0.063645	0.999379	1003	4	2.8352
Crygb	3	0.040734	0.075374	0.803581	1887	1	3.194	0.016399	0.047747	0.999379	1004	2	3.194
Sipa1	4	0.93292	0.91138	0.977947	17953	0	3.9287	0.01641	0.063645	0.999379	1005	3	3.9287
Txlnb	4	0.98356	0.97524	0.994415	18882	0	2.847	0.01644	0.063645	0.999379	1006	4	2.847
Tcf21	4	0.15796	0.25163	0.914895	5154	1	3.7118	0.016455	0.063645	0.999379	1007	2	3.7118
Taok1	4	0.90481	0.88569	0.97356	17429	0	1.3623	0.016467	0.063853	0.999379	1008	3	1.3623
Gmeb1	4	0.74225	0.73165	0.962274	14378	1	4.2628	0.016493	0.06405	0.999379	1009	3	4.2628
Dennd4b	4	0.98349	0.975	0.994415	18881	0	3.0136	0.016514	0.064274	0.999379	1010	4	3.0136
Dlg1	4	0.7319	0.72467	0.962274	14182	1	0.60707	0.016523	0.064274	0.999379	1011	2	0.60707
Smarcd2	4	0.98344	0.975	0.994415	18880	0	2.6442	0.016559	0.064274	0.999379	1012	4	2.6442
Cd300ld	4	0.41658	0.52228	0.945217	9977	1	2.2334	0.016577	0.064274	0.999379	1013	2	2.2334
Scube3	3	0.98339	0.98027	0.996434	18879	0	3.452	0.016612	0.04816	0.999379	1014	3	3.452
Pcdhb21	3	0.0076956	0.016516	0.671676	465	1	4.7898	0.016613	0.04816	0.999379	1015	2	4.7898
Plxna4	4	0.21691	0.33475	0.945217	6332	1	1.4893	0.016637	0.064274	0.999379	1016	3	1.4893
Dgkd	4	0.98334	0.975	0.994415	18878	0	2.1671	0.016656	0.064274	0.999379	1017	4	2.1671
Celf1	2	0.98333	0.97984	0.996405	18877	0	5.4655	0.016675	0.03272	0.999379	1018	2	5.4655
Vmn1r78	4	0.16742	0.26689	0.928713	5346	1	4.9877	0.016678	0.064274	0.999379	1019	3	4.9877
Clip2	4	0.96487	0.95135	0.987706	18534	0	3.9683	0.016688	0.064274	0.999379	1020	4	3.9683
Ffar3	4	0.43402	0.53214	0.945217	10154	1	4.5706	0.016692	0.064274	0.999379	1021	3	4.5706
Mup8	1	0.98325	0.98424	0.997285	18876	0	8.4703	0.016749	0.015762	0.999379	1022	1	8.4703
Sertad2	4	0.16261	0.25669	0.919903	5232	1	3.9333	0.016761	0.064496	0.999379	1023	3	3.9333
Plek2	4	0.19841	0.30693	0.945217	5959	2	-1.077	0.016808	0.065003	0.999379	1024	2	-1.077
Dennd1c	4	0.60327	0.62362	0.956086	12220	1	3.5704	0.016814	0.065003	0.999379	1025	3	3.5704
Mapk1	4	0.98317	0.97415	0.993988	18875	0	1.693	0.016827	0.065003	0.999379	1026	4	1.693
Prdx4	4	0.080199	0.15035	0.848976	3226	1	5.1024	0.016827	0.065003	0.999379	1027	3	5.1024
Tmem42	3	0.97876	0.97309	0.993529	18801	0	5.1369	0.016857	0.048161	0.999379	1028	3	5.1369
D330045A20Rik	4	0.95148	0.93634	0.984097	18308	0	2.0254	0.016865	0.06543	0.999379	1029	4	2.0254
2210407C18Rik	3	0.98308	0.98027	0.996434	18874	0	3.2029	0.016918	0.048161	0.999379	1030	3	3.2029
Vmn2r6	3	0.61752	0.60785	0.956086	12423	1	5.8829	0.016918	0.048161	0.999379	1031	2	5.8829
Endog	4	0.040107	0.085245	0.803581	1853	2	-1.352	0.016922	0.065888	0.999379	1032	1	-1.352
Tmed8	4	0.98306	0.97387	0.993804	18873	0	3.6759	0.016937	0.065888	0.999379	1033	4	3.6759
Zfp131	2	0.98306	0.97956	0.996346	18872	0	6.523	0.01694	0.032985	0.999379	1034	2	6.523
Tgfbr3	3	0.66872	0.64112	0.958091	13157	1	0.73687	0.016998	0.048548	0.999379	1035	2	0.73687
Magea6	4	0.94243	0.92242	0.979363	18136	0	3.8658	0.016999	0.065888	0.999379	1036	4	3.8658
Ldhal6b	4	0.87728	0.85095	0.967425	16907	0	3.5073	0.017024	0.065888	0.999379	1037	3	3.5073
Casq2	4	0.95597	0.94151	0.986321	18374	0	3.7647	0.017082	0.065889	0.999379	1038	4	3.7647
Thoc5	2	0.98037	0.97704	0.995142	18827	0	6.7103	0.017086	0.032985	0.999379	1039	2	6.7103
Olfr631	4	0.23125	0.35652	0.945217	6639	1	1.8176	0.017092	0.065889	0.999379	1040	3	1.8176
5430427O19Rik	4	0.74783	0.73443	0.962274	14443	1	3.5054	0.017103	0.065889	0.999379	1041	3	3.5054
Lck	4	0.96531	0.95177	0.987706	18543	0	4.2902	0.017128	0.065889	0.999379	1042	4	4.2902
Arhgap33	4	0.12475	0.21521	0.899453	4403	1	5.0523	0.017144	0.065889	0.999379	1043	3	5.0523
Nat14	4	0.98283	0.97387	0.993804	18871	0	2.3286	0.017171	0.065889	0.999379	1044	4	2.3286
Matn4	4	0.7732	0.75054	0.962274	14912	1	4.1092	0.017186	0.065889	0.999379	1045	3	4.1092
Pgam2	4	0.097754	0.18166	0.868566	3798	2	2.0936	0.017189	0.065889	0.999379	1046	2	2.0936
Usp29	4	0.98281	0.97387	0.993804	18870	0	2.1201	0.017193	0.065889	0.999379	1047	4	2.1201
4930427A07Rik	4	0.4494	0.53697	0.945217	10327	1	5.0411	0.017198	0.065889	0.999379	1048	3	5.0411
Ppy	4	0.41778	0.52506	0.945217	9990	1	0.53767	0.017206	0.065889	0.999379	1049	2	0.53767
Tmem89	3	0.9827	0.98004	0.996434	18869	0	3.7849	0.0173	0.048753	0.999379	1050	3	3.7849
Stk32a	4	0.98269	0.97359	0.993783	18868	0	2.3253	0.017306	0.066131	0.999379	1051	4	2.3253
Tlr2	4	0.91153	0.89139	0.97356	17559	0	2.3876	0.017491	0.067003	0.999379	1052	2	2.3876
Gpha2	4	0.093711	0.16978	0.848976	3671	1	3.7817	0.017495	0.067003	0.999379	1053	3	3.7817
Bcl9l	4	0.68547	0.68566	0.962274	13405	1	4.8044	0.017507	0.067003	0.999379	1054	3	4.8044
Heatr6	3	0.98248	0.97957	0.996346	18866	0	4.5133	0.01752	0.049165	0.999379	1055	3	4.5133
Ldlrad2	4	0.79832	0.78177	0.963641	15413	0	3.9295	0.017537	0.067003	0.999379	1056	3	3.9295
Iqcf4	4	0.31397	0.44431	0.945217	8288	2	-1.0362	0.017548	0.067003	0.999379	1057	1	-1.0362
Kcnh6	4	0.98244	0.97359	0.993783	18865	0	2.5791	0.01756	0.067003	0.999379	1058	4	2.5791
Cenpk	1	0.98242	0.98424	0.997285	18864	0	7.6341	0.017585	0.015762	0.999379	1059	1	7.6341
Cbx8	4	0.86261	0.83733	0.966857	16632	0	3.7045	0.0176	0.067225	0.999379	1060	3	3.7045
Olfr1143	4	0.10445	0.19389	0.876997	3987	1	3.843	0.01762	0.067225	0.999379	1061	3	3.843
Sesn1	4	0.21691	0.33475	0.945217	6327	1	3.8782	0.017625	0.067225	0.999379	1062	3	3.8782
Siah1a	4	0.86917	0.84534	0.967185	16758	0	4.0284	0.017646	0.067226	0.999379	1063	3	4.0284
Cd55	4	0.48337	0.55017	0.945217	10705	1	2.4127	0.017661	0.067438	0.999379	1064	3	2.4127
Surf4	4	0.54568	0.59231	0.956086	11510	1	3.7652	0.017664	0.067438	0.999379	1065	2	3.7652
Galnt10	4	0.72356	0.71632	0.962274	14033	1	4.5065	0.017701	0.067438	0.999379	1066	3	4.5065
Gfra2	4	0.9823	0.97332	0.993721	18862	0	1.905	0.017705	0.067438	0.999379	1067	4	1.905
Rnf214	4	0.96829	0.95434	0.988706	18602	0	4.3862	0.017707	0.067438	0.999379	1068	4	4.3862
Obscn	4	0.14132	0.23108	0.906649	4770	1	1.2463	0.017718	0.067438	0.999379	1069	2	1.2463
Acat2	4	0.33639	0.46006	0.945217	8687	1	3.7144	0.017775	0.067672	0.999379	1070	3	3.7144
Ddit3	4	0.72674	0.72189	0.962274	14076	1	4.4968	0.017811	0.067673	0.999379	1071	3	4.4968
Pan3	4	0.86472	0.84269	0.967185	16683	0	3.283	0.017832	0.068108	0.999379	1072	3	3.283
Vax1	4	0.98214	0.97305	0.993529	18861	0	3.3775	0.017857	0.068108	0.999379	1073	4	3.3775
Eif4g2	3	0.92489	0.90123	0.97513	17795	0	1.117	0.017938	0.050434	0.999379	1074	3	1.117
Nupl2	4	0.73727	0.73024	0.962274	14273	1	3.9649	0.017944	0.068349	0.999379	1075	3	3.9649
Abo	4	0.332	0.45795	0.945217	8604	2	1.9062	0.017946	0.068349	0.999379	1076	2	1.9062
Fam114a2	2	0.79702	0.7621	0.963641	15323	0	4.2823	0.017972	0.035115	0.999379	1077	2	4.2823
Anks1b	4	0.69783	0.69402	0.962274	13558	1	0.65584	0.018002	0.068603	0.999379	1078	2	0.65584
Crb3	4	0.49757	0.56206	0.954242	10880	1	3.7572	0.018047	0.068603	0.999379	1079	3	3.7572
Rnf130	4	0.24128	0.36608	0.945217	6870	1	1.7665	0.018059	0.068603	0.999379	1080	3	1.7665
Hyal1	4	0.11519	0.2013	0.876997	4224	2	2.376	0.018074	0.068603	0.999379	1081	2	2.376
Bsnd	4	0.098306	0.18225	0.868566	3815	1	3.827	0.018082	0.068603	0.999379	1082	3	3.827
Arhgef19	4	0.86164	0.83629	0.966691	16616	0	1.3201	0.018116	0.068603	0.999379	1083	3	1.3201
Bcl9	4	0.98187	0.97247	0.993379	18860	0	4.3327	0.018127	0.068603	0.999379	1084	4	4.3327
Cyp2d12	4	0.73319	0.72467	0.962274	14201	1	4.2147	0.018128	0.068603	0.999379	1085	3	4.2147
D17H6S53E	4	0.011945	0.02682	0.73318	680	3	-2.6269	0.018173	0.068603	0.999379	1086	1	-2.6269
Slc39a4	4	0.6247	0.63408	0.956086	12526	1	4.6165	0.018179	0.068603	0.999379	1087	3	4.6165
Myo18a	4	0.78604	0.76241	0.963641	15130	1	3.4121	0.018184	0.068603	0.999379	1088	3	3.4121
Resp18	4	0.98181	0.97247	0.993379	18859	0	3.4088	0.018185	0.068603	0.999379	1089	4	3.4088
Prdm1	4	0.98181	0.97247	0.993379	18858	0	3.0293	0.018194	0.068603	0.999379	1090	4	3.0293
Arsg	4	0.79832	0.78177	0.963641	15380	0	3.4744	0.018197	0.068603	0.999379	1091	2	3.4744
Mss51	4	0.9818	0.97247	0.993379	18857	0	2.3739	0.018197	0.068603	0.999379	1092	4	2.3739
Spta1	4	0.49757	0.56206	0.954242	10877	1	4.0645	0.018222	0.068604	0.999379	1093	3	4.0645
Olfr912	4	0.48853	0.55294	0.945217	10751	1	4.2107	0.018223	0.068604	0.999379	1094	3	4.2107
Pof1b	4	0.98175	0.97247	0.993379	18856	0	4.0065	0.018245	0.068604	0.999379	1095	4	4.0065
Slc22a30	4	0.4958	0.56139	0.954242	10856	1	3.8917	0.018248	0.068604	0.999379	1096	3	3.8917
Timm8b	4	0.7638	0.74353	0.962274	14766	1	2.7288	0.018287	0.068604	0.999379	1097	3	2.7288
Lpin3	4	0.67117	0.6745	0.962274	13190	1	3.0556	0.018291	0.068604	0.999379	1098	3	3.0556
Ccdc109b	4	0.98167	0.97247	0.993379	18854	0	1.9917	0.018326	0.068604	0.999379	1099	4	1.9917
Glis2	4	0.80494	0.78519	0.963641	15531	0	0.015633	0.018343	0.068604	0.999379	1100	1	0.015633
Camk1d	4	0.11937	0.20578	0.88298	4301	1	4.371	0.018397	0.068604	0.999379	1101	3	4.371
Ncoa6	4	0.38587	0.50872	0.945217	9640	1	2.9529	0.018421	0.069061	0.999379	1102	3	2.9529
Xaf1	4	0.10931	0.19632	0.876997	4070	2	1.356	0.018426	0.069274	0.999379	1103	2	1.356
Rab18	4	0.98152	0.97222	0.993379	18851	0	2.7541	0.018484	0.069274	0.999379	1104	4	2.7541
Macrod2	4	0.30831	0.43999	0.945217	8175	2	2.5777	0.018497	0.069274	0.999379	1105	2	2.5777
Acin1	4	0.26242	0.38352	0.945217	7282	1	3.0262	0.018532	0.069274	0.999379	1106	3	3.0262
Rgs17	4	0.84109	0.81728	0.963641	16246	0	4.3468	0.018547	0.069274	0.999379	1107	3	4.3468
Odf2	4	0.12814	0.21869	0.902377	4486	1	3.9208	0.01855	0.069274	0.999379	1108	3	3.9208
Tgoln1	4	0.98141	0.97222	0.993379	18850	0	2.9686	0.018588	0.069274	0.999379	1109	4	2.9686
Bpifb3	4	0.9814	0.97222	0.993379	18849	0	3.5524	0.0186	0.069274	0.999379	1110	4	3.5524
Dpp8	4	0.71949	0.71493	0.962274	13917	1	3.7458	0.018628	0.069274	0.999379	1111	3	3.7458
P2rx4	4	0.98136	0.97222	0.993379	18848	0	2.9228	0.018643	0.069274	0.999379	1112	4	2.9228
Bnc1	4	0.92595	0.90141	0.97513	17817	0	4.1589	0.018657	0.069274	0.999379	1113	3	4.1589
Blm	4	0.68547	0.68566	0.962274	13389	1	-0.03589	0.018684	0.069275	0.999379	1114	2	-0.03589
Ikbkb	4	0.98128	0.97222	0.993379	18847	0	3.5261	0.018716	0.069275	0.999379	1115	4	3.5261
Mylk4	4	0.083218	0.15532	0.848976	3339	2	-0.49812	0.018741	0.069275	0.999379	1116	2	-0.49812
Yipf5	4	0.91153	0.89139	0.97356	17533	0	4.2836	0.018779	0.069275	0.999379	1117	3	4.2836
Slc25a24	4	0.29652	0.42639	0.945217	7975	2	2.4841	0.018781	0.069275	0.999379	1118	2	2.4841
Fads2	4	0.034835	0.077366	0.803581	1653	1	1.505	0.018798	0.069275	0.999379	1119	2	1.505
Lama2	3	0.4986	0.50768	0.945217	10887	1	5.5274	0.018811	0.053126	0.999379	1120	2	5.5274
Gnpnat1	4	0.98118	0.97222	0.993379	18846	0	1.7945	0.018816	0.069275	0.999379	1121	4	1.7945
Gm597	4	0.89361	0.87813	0.97356	17233	0	3.9525	0.018844	0.069275	0.999379	1122	3	3.9525
Olfr353	3	0.98115	0.97634	0.994737	18845	0	3.6375	0.018847	0.053126	0.999379	1123	3	3.6375
Ccdc186	4	0.52224	0.58105	0.956086	11175	1	4.0028	0.018862	0.069275	0.999379	1124	3	4.0028
Ssr2	4	0.98114	0.97222	0.993379	18844	0	3.0846	0.018864	0.069275	0.999379	1125	4	3.0846
Prpf39	4	0.87784	0.85095	0.967425	16920	0	3.1731	0.018898	0.069275	0.999379	1126	3	3.1731
Batf3	4	0.86623	0.84482	0.967185	16712	0	3.6241	0.018924	0.069275	0.999379	1127	3	3.6241
St8sia4	4	0.17078	0.26976	0.928713	5422	1	1.5888	0.018969	0.069494	0.999379	1128	2	1.5888
Olfr314	4	0.98101	0.97222	0.993379	18843	0	2.2365	0.018989	0.069494	0.999379	1129	4	2.2365
Gzmf	4	0.33774	0.46115	0.945217	8724	1	4.136	0.019005	0.06998	0.999379	1130	3	4.136
Sh3kbp1	4	0.7525	0.73587	0.962274	14522	1	0.01149	0.019025	0.06998	0.999379	1131	2	0.01149
Adh1	4	0.98097	0.97191	0.993379	18842	0	3.7166	0.019027	0.06998	0.999379	1132	4	3.7166
Slc4a7	2	0.87113	0.84121	0.967185	16797	0	5.3014	0.019028	0.038383	0.999379	1133	2	5.3014
Vezf1	4	0.98097	0.97191	0.993379	18841	0	3.4067	0.01903	0.06998	0.999379	1134	4	3.4067
Drd3	3	0.43891	0.46888	0.945217	10209	1	1.4633	0.019048	0.054041	0.999379	1135	2	1.4633
Klf11	4	0.63621	0.64103	0.958091	12671	1	5.5122	0.019124	0.069981	0.999379	1136	3	5.5122
Fam134b	4	0.33748	0.46115	0.945217	8706	2	-0.54247	0.019139	0.070422	0.999379	1137	1	-0.54247
Hnf4a	4	0.98085	0.97161	0.993379	18839	0	3.2038	0.019154	0.070675	0.999379	1138	4	3.2038
Mrpl44	3	0.98083	0.9753	0.994415	18838	0	4.7083	0.019173	0.056548	0.999379	1139	3	4.7083
Elfn1	4	0.029152	0.069901	0.803581	1415	2	1.8193	0.019176	0.070675	0.999379	1140	2	1.8193
Arhgef28	4	0.91921	0.89691	0.97356	17684	0	3.5339	0.019181	0.070675	0.999379	1141	3	3.5339
Gsk3b	4	0.61763	0.6299	0.956086	12426	1	3.5153	0.019221	0.070957	0.999379	1142	3	3.5153
Rorc	4	0.98074	0.97099	0.993345	18837	0	3.5702	0.019259	0.07121	0.999379	1143	4	3.5702
Poteg	3	0.17738	0.28417	0.945217	5585	1	5.7555	0.019279	0.056549	0.999379	1144	2	5.7555
Cacng2	4	0.98072	0.97099	0.993345	18836	0	3.6758	0.019282	0.07121	0.999379	1145	4	3.6758
Prr22	4	0.92178	0.89768	0.97356	17717	0	4.4304	0.019309	0.071453	0.999379	1146	3	4.4304
Orai2	4	0.98068	0.97071	0.993199	18835	0	2.9064	0.019324	0.071453	0.999379	1147	4	2.9064
Cyp2r1	3	0.8707	0.84135	0.967185	16795	0	2.3017	0.019346	0.056785	0.999379	1148	2	2.3017
Pcdhgc3	4	0.67175	0.6745	0.962274	13208	1	2.5465	0.019366	0.071948	0.999379	1149	2	2.5465
Vsx2	4	0.55561	0.59789	0.956086	11622	1	-0.084144	0.019366	0.071948	0.999379	1150	1	-0.084144
Krtap31-2	4	0.66782	0.6731	0.962274	13150	1	3.8126	0.019382	0.071948	0.999379	1151	3	3.8126
Khk	4	0.9806	0.97071	0.993199	18832	0	3.0693	0.019405	0.071949	0.999379	1152	4	3.0693
Bach2	3	0.85209	0.81898	0.963641	16450	0	5.9953	0.01941	0.056786	0.999379	1153	2	5.9953
Dctpp1	4	0.87204	0.84585	0.967185	16804	0	0.94972	0.019423	0.071949	0.999379	1154	3	0.94972
Pnliprp2	4	0.98058	0.97071	0.993199	18831	0	2.9301	0.019423	0.071949	0.999379	1155	4	2.9301
Dmbt1	4	0.98057	0.97071	0.993199	18830	0	3.2014	0.019432	0.071949	0.999379	1156	4	3.2014
Olfr1015	4	0.42015	0.52506	0.945217	10009	1	3.3144	0.019447	0.072203	0.999379	1157	2	3.3144
Olfr994	4	0.72763	0.72327	0.962274	14093	1	1.0311	0.01948	0.072204	0.999379	1158	2	1.0311
Tdgf1	3	0.59257	0.58534	0.956086	12081	1	5.2355	0.019489	0.057372	0.999379	1159	2	5.2355
Gm6812	3	0.88485	0.85839	0.97078	17052	0	5.2177	0.019529	0.057372	0.999379	1160	3	5.2177
Lce3c	4	0.30589	0.43724	0.945217	8142	1	1.8931	0.019537	0.072485	0.999379	1161	2	1.8931
Atp13a5	3	0.6898	0.67063	0.962274	13462	0	5.7207	0.019555	0.057372	0.999379	1162	2	5.7207
Olfr610	3	0.53776	0.53204	0.945217	11436	1	4.8519	0.019575	0.057372	0.999379	1163	2	4.8519
Tmem40	4	0.98041	0.9701	0.993009	18829	0	3.0483	0.019585	0.072922	0.999379	1164	4	3.0483
Clybl	4	0.98035	0.9701	0.993009	18826	0	2.9044	0.019652	0.072922	0.999379	1165	4	2.9044
Rassf6	4	0.87918	0.85398	0.967491	16944	0	4.0683	0.019656	0.072922	0.999379	1166	3	4.0683
Klk14	4	0.98033	0.9701	0.993009	18825	0	3.7432	0.019667	0.072922	0.999379	1167	4	3.7432
Ism2	4	0.94442	0.92606	0.980458	18177	0	3.2128	0.019707	0.072922	0.999379	1168	4	3.2128
Fam3a	4	0.37895	0.50053	0.945217	9519	1	2.7639	0.019747	0.072922	0.999379	1169	3	2.7639
Ankrd52	4	0.98022	0.9701	0.993009	18824	0	2.9869	0.019781	0.076074	0.999379	1170	4	2.9869
Nup62cl	4	0.37074	0.49444	0.945217	9346	1	4.8414	0.019797	0.076075	0.999379	1171	3	4.8414
Olfr1052	4	0.60583	0.62433	0.956086	12250	1	1.0547	0.01982	0.076335	0.999379	1172	2	1.0547
Ppm1b	4	0.96798	0.95394	0.988401	18595	0	2.2075	0.019877	0.076336	0.999379	1173	4	2.2075
Fam84a	4	0.98007	0.96978	0.993009	18823	0	2.7992	0.019925	0.076336	0.999379	1174	4	2.7992
Oas1g	4	0.96366	0.95004	0.987706	18511	0	1.9851	0.019934	0.076336	0.999379	1175	4	1.9851
Rgs14	4	0.92178	0.89768	0.97356	17751	0	2.0549	0.019991	0.076885	0.999379	1176	3	2.0549
Nadk	4	0.004459	0.0099059	0.629886	274	1	3.6673	0.019995	0.076885	0.999379	1177	3	3.6673
Msx1	3	0.98	0.97447	0.994205	18822	0	4.2323	0.019999	0.057612	0.999379	1178	3	4.2323
Ankrd35	4	0.89118	0.87463	0.97356	17177	0	4.6453	0.020011	0.076885	0.999379	1179	3	4.6453
Fhdc1	4	0.95655	0.94203	0.986321	18381	0	4.207	0.020025	0.076885	0.999379	1180	4	4.207
Unc13a	3	0.65283	0.63363	0.956086	12946	1	1.8114	0.020029	0.057612	0.999379	1181	2	1.8114
Plxnb2	4	0.41282	0.52228	0.945217	9941	1	-0.12612	0.020047	0.077108	0.999379	1182	1	-0.12612
Htr1a	3	0.97995	0.97447	0.994205	18821	0	3.1703	0.02005	0.057612	0.999379	1183	3	3.1703
Emp2	4	0.97994	0.96915	0.99247	18820	0	3.8503	0.02006	0.077108	0.999379	1184	4	3.8503
Ccm2	4	0.97993	0.96915	0.99247	18819	0	3.5111	0.020066	0.077108	0.999379	1185	4	3.5111
2610008E11Rik	4	0.31731	0.44542	0.945217	8333	2	0.66029	0.020104	0.077108	0.999379	1186	2	0.66029
Pcif1	4	0.87412	0.84793	0.967185	16844	0	3.8967	0.020121	0.077109	0.999379	1187	3	3.8967
Gpr180	4	0.97988	0.96915	0.99247	18817	0	1.6664	0.020123	0.077109	0.999379	1188	4	1.6664
Scgb3a2	4	0.83269	0.80744	0.963641	16078	0	4.4674	0.020158	0.077109	0.999379	1189	3	4.4674
Ctnnbl1	4	0.79832	0.78177	0.963641	15420	0	4.9182	0.02017	0.077109	0.999379	1190	3	4.9182
Foxk2	3	0.43891	0.46888	0.945217	10189	1	2.0007	0.020199	0.057993	0.999379	1191	2	2.0007
Olfr1104	4	0.75638	0.73865	0.962274	14594	1	2.7278	0.020202	0.077538	0.999379	1192	2	2.7278
Glt1d1	4	0.82584	0.80123	0.963641	15939	0	4.3264	0.020231	0.077538	0.999379	1193	3	4.3264
Als2	3	0.078417	0.13121	0.838017	3160	2	-1.2045	0.020242	0.057993	0.999379	1194	1	-1.2045
Islr2	4	0.97975	0.96915	0.99247	18814	0	2.6722	0.020247	0.077538	0.999379	1195	4	2.6722
Sbno2	4	0.97975	0.96915	0.99247	18813	0	1.9282	0.020255	0.077538	0.999379	1196	4	1.9282
Ier5	4	0.17732	0.28366	0.945217	5584	2	2.6476	0.020271	0.077538	0.999379	1197	2	2.6476
Olfr677	4	0.83053	0.8062	0.963641	16022	0	2.6844	0.020275	0.077538	0.999379	1198	3	2.6844
Zfp91	3	0.13673	0.21084	0.894918	4667	1	4.8313	0.020279	0.058363	0.999379	1199	2	4.8313
Mark2	4	0.97971	0.96915	0.99247	18812	0	2.112	0.020287	0.077538	0.999379	1200	4	2.112
Camta2	2	0.29896	0.30779	0.945217	8038	1	2.8777	0.020312	0.040497	0.999379	1201	1	2.8777
Pgr15l	4	0.23224	0.35652	0.945217	6663	1	2.6512	0.020388	0.077752	0.999379	1202	3	2.6512
Etf1	2	0.9548	0.95245	0.987706	18368	0	6.1087	0.020426	0.040497	0.999379	1203	2	6.1087
Psmd5	4	0.18505	0.29792	0.945217	5717	2	2.6371	0.020428	0.077753	0.999379	1204	2	2.6371
Defb15	4	0.96404	0.95046	0.987706	18517	0	3.7904	0.020485	0.078035	0.999379	1205	4	3.7904
Ppara	4	0.024834	0.062415	0.803581	1236	2	0.65921	0.020502	0.078035	0.999379	1206	2	0.65921
Cttnbp2nl	4	0.87937	0.85398	0.967491	16948	0	4.3876	0.020503	0.078035	0.999379	1207	3	4.3876
AW549877	4	0.95849	0.94301	0.986321	18416	0	3.8626	0.020504	0.078035	0.999379	1208	4	3.8626
Hemk1	4	0.71229	0.70942	0.962274	13829	1	3.5327	0.020512	0.078035	0.999379	1209	3	3.5327
Ptpn11	4	0.97945	0.96882	0.99247	18811	0	1.935	0.02055	0.078035	0.999379	1210	4	1.935
Gm5771	4	0.9794	0.96882	0.99247	18810	0	2.845	0.020597	0.078035	0.999379	1211	4	2.845
4930564B18Rik	4	0.13478	0.23023	0.906649	4634	2	0.48473	0.020615	0.078035	0.999379	1212	2	0.48473
Alad	4	0.97938	0.96882	0.99247	18809	0	3.2003	0.020619	0.078035	0.999379	1213	4	3.2003
Zranb1	4	0.41282	0.52228	0.945217	9905	1	3.599	0.02062	0.078035	0.999379	1214	3	3.599
Olfr1378	4	0.97935	0.96882	0.99247	18808	0	2.7546	0.02065	0.078036	0.999379	1215	4	2.7546
Mphosph9	4	0.73319	0.72467	0.962274	14202	1	1.3946	0.020672	0.078036	0.999379	1216	3	1.3946
Cd72	4	0.97932	0.96882	0.99247	18807	0	1.6923	0.020682	0.078036	0.999379	1217	4	1.6923
Wfdc6b	4	0.61307	0.62779	0.956086	12375	1	2.5826	0.020698	0.078036	0.999379	1218	2	2.5826
Pcbp4	4	0.58018	0.61332	0.956086	11949	1	4.7736	0.020709	0.078036	0.999379	1219	3	4.7736
Bcar3	4	0.24339	0.36706	0.945217	6905	1	4.1063	0.020723	0.078036	0.999379	1220	3	4.1063
Sumo3	3	0.97924	0.97394	0.993817	18805	0	3.6289	0.020762	0.058829	0.999379	1221	3	3.6289
Zfp386	4	0.97924	0.96882	0.99247	18804	0	2.6698	0.020764	0.078036	0.999379	1222	4	2.6698
H2afv	4	0.27461	0.40125	0.945217	7596	1	2.1329	0.020785	0.078036	0.999379	1223	3	2.1329
H2-Ke6	4	0.22484	0.34505	0.945217	6507	2	0.94001	0.020842	0.078497	0.999379	1224	2	0.94001
Nt5c2	4	0.63183	0.63826	0.956086	12614	1	4.2762	0.02091	0.078957	0.999379	1225	3	4.2762
Sag	4	0.61307	0.62779	0.956086	12371	1	3.0251	0.020923	0.078958	0.999379	1226	2	3.0251
Gm3238	4	0.97905	0.96819	0.992426	18803	0	3.5709	0.020947	0.079179	0.999379	1227	4	3.5709
Cxxc5	4	0.44197	0.5342	0.945217	10253	1	0.0058313	0.020955	0.079179	0.999379	1228	2	0.0058313
Gm5111	4	0.055736	0.10838	0.819268	2429	1	3.1596	0.020966	0.079179	0.999379	1229	3	3.1596
Gpatch3	4	0.81831	0.79423	0.963641	15826	0	4.5244	0.021065	0.079179	0.999379	1230	3	4.5244
Ism1	4	0.066428	0.12771	0.838017	2783	1	2.8626	0.021069	0.079179	0.999379	1231	3	2.8626
Fbxo28	4	0.97893	0.96819	0.992426	18802	0	4.4909	0.021071	0.079179	0.999379	1232	4	4.4909
Col9a2	4	0.18716	0.30305	0.945217	5757	2	2.0103	0.021239	0.07938	0.999379	1233	2	2.0103
Olfr811	4	0.97875	0.96819	0.992426	18800	0	3.6774	0.021252	0.07938	0.999379	1234	4	3.6774
Fcrl5	3	0.97869	0.9728	0.993401	18799	0	2.5208	0.021314	0.062279	0.999379	1235	3	2.5208
Spn	4	0.97865	0.96787	0.992256	18797	0	4.1486	0.021347	0.07965	0.999379	1236	4	4.1486
2810408A11Rik	4	0.49757	0.56206	0.954242	10875	1	0.069124	0.021352	0.07965	0.999379	1237	1	0.069124
Dennd3	4	0.034611	0.077366	0.803581	1645	1	3.5565	0.021356	0.07965	0.999379	1238	3	3.5565
Rnf103	3	0.97864	0.9728	0.993401	18796	0	3.0827	0.02136	0.06228	0.999379	1239	3	3.0827
Nox3	4	0.74694	0.73374	0.962274	14430	1	3.9652	0.021364	0.079651	0.999379	1240	3	3.9652
Sort1	3	0.93212	0.91284	0.978443	17936	0	5.4196	0.021391	0.062652	0.999379	1241	3	5.4196
Eif2s3y	4	0.01086	0.02525	0.73103	648	2	1.4985	0.021403	0.080141	0.999379	1242	2	1.4985
Olfr102	4	0.6801	0.68009	0.962274	13324	1	4.3428	0.02144	0.080141	0.999379	1243	3	4.3428
4833420G17Rik	4	0.97855	0.96787	0.992256	18795	0	3.733	0.021453	0.080141	0.999379	1244	4	3.733
Dcx	4	0.97515	0.96491	0.992256	18731	0	1.7367	0.021466	0.080141	0.999379	1245	4	1.7367
Paqr9	3	0.31382	0.39238	0.945217	8274	1	5.6995	0.021467	0.062653	0.999379	1246	2	5.6995
Hmgn1	4	0.31579	0.44431	0.945217	8311	2	2.9062	0.021479	0.080141	0.999379	1247	2	2.9062
Mpv17l2	4	0.97852	0.96787	0.992256	18793	0	2.8974	0.021482	0.080141	0.999379	1248	4	2.8974
Hist2h2be	2	0.97851	0.97374	0.993804	18792	0	5.6807	0.021486	0.04206	0.999379	1249	2	5.6807
Gem	4	0.95932	0.94446	0.986763	18431	0	3.5192	0.021493	0.080606	0.999379	1250	4	3.5192
Rims4	4	0.97847	0.96787	0.992256	18791	0	1.9178	0.021527	0.081307	0.999379	1251	4	1.9178
Dner	4	0.88117	0.85597	0.969178	16991	0	4.4086	0.021533	0.081307	0.999379	1252	3	4.4086
B4galnt1	4	0.97847	0.96787	0.992256	18790	0	2.7978	0.021534	0.081307	0.999379	1253	4	2.7978
Gcnt4	4	0.92978	0.90791	0.977646	17888	0	3.6227	0.021565	0.081307	0.999379	1254	3	3.6227
Mov10	4	0.88878	0.87199	0.97356	17127	0	3.5292	0.021579	0.081307	0.999379	1255	3	3.5292
Vmn2r56	4	0.79832	0.78177	0.963641	15409	0	4.3684	0.021593	0.081308	0.999379	1256	3	4.3684
Cdh16	4	0.59082	0.6188	0.956086	12064	1	2.4046	0.021603	0.081308	0.999379	1257	2	2.4046
Cst3	3	0.058242	0.095658	0.806893	2508	1	3.4191	0.021606	0.063044	0.999379	1258	2	3.4191
Klhl25	4	0.18513	0.29792	0.945217	5719	2	-0.35273	0.021636	0.081308	0.999379	1259	2	-0.35273
Hormad2	4	0.2255	0.34505	0.945217	6513	2	2.5065	0.02165	0.081526	0.999379	1260	2	2.5065
Slpi	4	0.8037	0.78452	0.963641	15498	0	3.7388	0.021726	0.081526	0.999379	1261	3	3.7388
Nppc	3	0.9672	0.95527	0.989319	18579	0	4.7386	0.021729	0.063044	0.999379	1262	3	4.7386
Pcdhac1	4	0.17078	0.26976	0.928713	5416	2	0.85312	0.021749	0.081526	0.999379	1263	2	0.85312
Mpzl2	4	0.017125	0.041555	0.803581	918	2	0.71596	0.021755	0.081526	0.999379	1264	2	0.71596
Bet1	3	0.97823	0.9728	0.993401	18789	0	3.4394	0.021769	0.063044	0.999379	1265	3	3.4394
Proser3	4	0.31279	0.44271	0.945217	8265	2	1.918	0.021841	0.081526	0.999379	1266	2	1.918
Dpf1	4	0.24807	0.37381	0.945217	7020	1	2.8593	0.021851	0.081526	0.999379	1267	2	2.8593
Lpar5	4	0.30859	0.43999	0.945217	8178	1	3.2454	0.021863	0.081741	0.999379	1268	3	3.2454
Xkrx	4	0.97812	0.96787	0.992256	18784	0	3.5679	0.021884	0.081741	0.999379	1269	4	3.5679
Tmem8	4	0.97812	0.96787	0.992256	18786	0	2.2487	0.021884	0.081741	0.999379	1270	4	2.2487
Cd40	4	0.97812	0.96787	0.992256	18788	0	2.221	0.021884	0.081741	0.999379	1271	4	2.221
Mmp15	4	0.97812	0.96787	0.992256	18785	0	2.3946	0.021884	0.081741	0.999379	1272	4	2.3946
Ssh2	4	0.22178	0.33843	0.945217	6437	2	2.7119	0.021918	0.081964	0.999379	1273	2	2.7119
Ccrn4l	3	0.97804	0.97253	0.993385	18783	0	3.9178	0.021958	0.063279	0.999379	1274	3	3.9178
Calm3	3	0.94557	0.92581	0.980458	18194	0	5.6874	0.021965	0.063279	0.999379	1275	3	5.6874
Lrrc69	4	0.079723	0.14913	0.848976	3211	3	-1.6096	0.021976	0.081965	0.999379	1276	1	-1.6096
Cmas	4	0.31148	0.4411	0.945217	8228	2	2.7298	0.021994	0.082461	0.999379	1277	2	2.7298
Hbb-bh1	4	0.045537	0.092478	0.803581	2074	1	-0.38285	0.022033	0.082461	0.999379	1278	1	-0.38285
A430089I19Rik	3	0.84272	0.81488	0.963641	16271	0	6.2651	0.022062	0.063537	0.999379	1279	2	6.2651
BC061212	3	0.97793	0.97222	0.993379	18782	0	3.8005	0.022067	0.063537	0.999379	1280	3	3.8005
Aph1b	3	0.13103	0.19536	0.876997	4550	1	0.37794	0.022074	0.063538	0.999379	1281	2	0.37794
Lpar3	3	0.97788	0.97222	0.993379	18781	0	2.2437	0.022118	0.063538	0.999379	1282	3	2.2437
Trappc6b	4	0.81831	0.79423	0.963641	15788	0	3.4047	0.022177	0.082462	0.999379	1283	3	3.4047
Mcm3ap	3	0.97782	0.97193	0.993379	18780	0	1.7915	0.022183	0.063792	0.999379	1284	3	1.7915
Vmn2r66	4	0.2257	0.34505	0.945217	6515	1	3.8085	0.022197	0.082462	0.999379	1285	3	3.8085
Hist1h2af	3	0.58001	0.5762	0.956086	11935	1	5.8246	0.022202	0.063792	0.999379	1286	2	5.8246
Cym	4	0.75295	0.73587	0.962274	14534	1	3.728	0.022235	0.082462	0.999379	1287	3	3.728
Rab30	3	0.73289	0.70607	0.962274	14198	0	5.348	0.022237	0.063792	0.999379	1288	2	5.348
Mapk11	4	0.72883	0.72327	0.962274	14115	1	0.92168	0.022259	0.082462	0.999379	1289	2	0.92168
Slxl1	2	0.72032	0.68005	0.962274	13942	0	3.2687	0.022279	0.042389	0.999379	1290	1	3.2687
Tmem184a	4	0.97769	0.96787	0.992256	18779	0	4.6405	0.022305	0.082689	0.999379	1291	4	4.6405
Col6a6	4	0.97769	0.96787	0.992256	18778	0	3.2027	0.022309	0.082689	0.999379	1292	4	3.2027
Slc35a3	4	0.074541	0.14026	0.838017	3039	3	-1.3211	0.022316	0.082689	0.999379	1293	1	-1.3211
Olfr1162	4	0.9776	0.96754	0.992256	18777	0	4.6417	0.022399	0.083441	0.999379	1294	4	4.6417
Pcyt1b	4	0.97759	0.96754	0.992256	18776	0	2.6993	0.022414	0.083441	0.999379	1295	4	2.6993
Rec8	4	0.11866	0.20502	0.882505	4285	1	4.4528	0.022472	0.084213	0.999379	1296	3	4.4528
Olfr695	4	0.58485	0.61604	0.956086	11973	1	2.4047	0.022486	0.084213	0.999379	1297	3	2.4047
Polm	4	0.9775	0.96691	0.992256	18775	0	3.2511	0.022502	0.084213	0.999379	1298	4	3.2511
Kmt2d	4	0.97749	0.96691	0.992256	18774	0	1.9872	0.022509	0.084213	0.999379	1299	4	1.9872
Vcam1	3	0.093568	0.1484	0.848976	3668	1	-0.11816	0.022543	0.063792	0.999379	1300	1	-0.11816
Ammecr1l	4	0.96001	0.94545	0.986989	18442	0	3.6996	0.022543	0.084214	0.999379	1301	4	3.6996
Dusp22	4	0.97744	0.96691	0.992256	18773	0	3.393	0.022563	0.084214	0.999379	1302	4	3.393
Ube2d1	4	0.91676	0.89457	0.97356	17637	0	3.597	0.022595	0.084214	0.999379	1303	3	3.597
Phex	4	0.97736	0.96691	0.992256	18771	0	1.8236	0.02264	0.084437	0.999379	1304	4	1.8236
Cdc42ep4	4	0.039764	0.084539	0.803581	1839	1	1.2745	0.022656	0.084437	0.999379	1305	2	1.2745
Trim8	4	0.78764	0.76385	0.963641	15194	1	3.5041	0.02266	0.084437	0.999379	1306	3	3.5041
Tapbp	2	0.97732	0.97306	0.993529	18770	0	4.7378	0.022676	0.042702	0.999379	1307	2	4.7378
Mllt4	4	0.97728	0.96674	0.992256	18769	0	1.7593	0.022724	0.08458	0.999379	1308	4	1.7593
Anxa1	3	0.5982	0.59129	0.956086	12152	1	4.5085	0.022729	0.064199	0.999379	1309	2	4.5085
Atp5b	2	0.92551	0.91293	0.978443	17805	0	5.9961	0.022763	0.042702	0.999379	1310	2	5.9961
Acsl4	4	0.52747	0.58387	0.956086	11247	1	3.8711	0.022769	0.084722	0.999379	1311	3	3.8711
Jrk	3	0.97721	0.97193	0.993379	18768	0	4.3495	0.022792	0.064199	0.999379	1312	3	4.3495
Olfr1535	3	0.3952	0.43188	0.945217	9755	1	3.3131	0.022798	0.064199	0.999379	1313	2	3.3131
Fbxl7	4	0.9772	0.96657	0.992256	18767	0	2.8107	0.0228	0.084722	0.999379	1314	4	2.8107
Zfp954	4	0.37074	0.49444	0.945217	9357	1	4.3849	0.022829	0.084722	0.999379	1315	3	4.3849
Olfr1164	4	0.10686	0.19528	0.876997	4035	1	3.5254	0.022865	0.084723	0.999379	1316	3	3.5254
Sap30l	4	0.97712	0.96657	0.992256	18766	0	3.1071	0.022876	0.084723	0.999379	1317	4	3.1071
Fgf17	4	0.36104	0.48436	0.945217	9167	1	0.53727	0.022883	0.084723	0.999379	1318	2	0.53727
Arid3b	4	0.97711	0.96657	0.992256	18765	0	1.8151	0.022886	0.084723	0.999379	1319	4	1.8151
Traf3ip1	4	0.9771	0.96657	0.992256	18764	0	2.2535	0.022903	0.084723	0.999379	1320	4	2.2535
E030018B13Rik	3	0.97709	0.97193	0.993379	18763	0	4.423	0.022907	0.0642	0.999379	1321	3	4.423
Myg1	4	0.39478	0.51663	0.945217	9751	1	1.6632	0.022939	0.084723	0.999379	1322	2	1.6632
Alpk2	4	0.91153	0.89139	0.97356	17548	0	3.598	0.022951	0.084723	0.999379	1323	3	3.598
Sfi1	3	0.73215	0.70329	0.962274	14193	0	2.7207	0.022968	0.0642	0.999379	1324	2	2.7207
Phkg2	4	0.67357	0.67658	0.962274	13225	1	0.051934	0.022996	0.084723	0.999379	1325	2	0.051934
Pgap2	4	0.93911	0.9184	0.978771	18072	0	5.0054	0.023011	0.085001	0.999379	1326	3	5.0054
Ccdc175	3	0.3004	0.38628	0.945217	8053	1	5.6696	0.02304	0.064456	0.999379	1327	2	5.6696
Cyp4f17	4	0.22088	0.33843	0.945217	6418	1	1.6557	0.023052	0.085001	0.999379	1328	2	1.6557
Nmbr	3	0.83778	0.81073	0.963641	16165	0	5.2113	0.023055	0.064845	0.999379	1329	2	5.2113
Skiv2l	3	0.7217	0.69411	0.962274	14000	0	-1.5689	0.023096	0.064845	0.999379	1330	1	-1.5689
Olfr64	4	0.15128	0.24592	0.914062	4985	2	0.33645	0.023222	0.085505	0.999379	1331	2	0.33645
Lyg2	3	0.92409	0.90057	0.97499	17785	0	5.034	0.023254	0.064845	0.999379	1332	3	5.034
Slco1a1	4	0.53722	0.58737	0.956086	11334	1	3.7943	0.023281	0.085505	0.999379	1333	3	3.7943
Kcnk10	4	0.97668	0.9659	0.992256	18761	0	2.1684	0.023318	0.085505	0.999379	1334	4	2.1684
Zfp597	4	0.96273	0.94826	0.98759	18494	0	2.3716	0.023336	0.085505	0.999379	1335	4	2.3716
Trub1	4	0.97665	0.9659	0.992256	18760	0	2.7249	0.023353	0.085505	0.999379	1336	4	2.7249
Lims2	4	0.0043774	0.0097978	0.629886	270	3	-1.8738	0.023392	0.085505	0.999379	1337	1	-1.8738
1600014K23Rik	4	0.36755	0.4918	0.945217	9294	2	2.5806	0.023395	0.085505	0.999379	1338	2	2.5806
Pten	4	0.9766	0.9659	0.992256	18759	0	2.0283	0.023396	0.085505	0.999379	1339	4	2.0283
Clec4b2	4	0.48853	0.55294	0.945217	10744	1	4.5583	0.023412	0.085505	0.999379	1340	3	4.5583
Olfr1366	4	0.96247	0.94826	0.98759	18491	0	3.6133	0.023432	0.085505	0.999379	1341	4	3.6133
Smo	4	0.71229	0.70942	0.962274	13818	1	3.035	0.023449	0.085505	0.999379	1342	3	3.035
Fcrla	4	0.97653	0.9659	0.992256	18758	0	1.9619	0.023468	0.085505	0.999379	1343	4	1.9619
Mmp25	4	0.97653	0.9659	0.992256	18757	0	2.352	0.023472	0.085505	0.999379	1344	4	2.352
Hrh4	4	0.71229	0.70942	0.962274	13819	1	3.0787	0.023505	0.085505	0.999379	1345	2	3.0787
BC068281	4	0.97649	0.9659	0.992256	18756	0	2.4349	0.023506	0.085505	0.999379	1346	4	2.4349
Zdhhc1	4	0.79832	0.78177	0.963641	15366	0	3.5602	0.023518	0.085505	0.999379	1347	3	3.5602
Ccnyl1	3	0.53342	0.53054	0.945217	11301	1	0.72403	0.023521	0.064845	0.999379	1348	2	0.72403
Hist1h2aa	3	0.97644	0.97163	0.993379	18755	0	2.9889	0.02356	0.065272	0.999379	1349	3	2.9889
Fmod	4	0.36182	0.48436	0.945217	9171	1	3.7323	0.023563	0.085505	0.999379	1350	3	3.7323
Atp6v1d	2	0.97635	0.97271	0.993401	18754	0	5.4319	0.023649	0.044781	0.999379	1351	2	5.4319
Usp26	4	0.93558	0.91478	0.978443	17997	0	4.2515	0.023675	0.085759	0.999379	1352	3	4.2515
Gne	4	0.72236	0.71493	0.962274	14022	1	4.0938	0.023741	0.085759	0.999379	1353	3	4.0938
Ucma	4	0.43118	0.53072	0.945217	10119	1	0.86245	0.023788	0.085759	0.999379	1354	2	0.86245
Foxj3	4	0.72194	0.71493	0.962274	14010	1	4.4298	0.023792	0.085759	0.999379	1355	3	4.4298
Hao2	4	0.95432	0.94001	0.985375	18359	0	3.4194	0.0238	0.085759	0.999379	1356	4	3.4194
Smcr8	3	0.97618	0.97075	0.993199	18753	0	4.0619	0.023818	0.066428	0.999379	1357	3	4.0619
Fsd1l	4	0.84729	0.82196	0.96423	16355	0	3.3129	0.02382	0.085759	0.999379	1358	3	3.3129
5830411N06Rik	3	0.97615	0.97075	0.993199	18752	0	2.9813	0.023851	0.066428	0.999379	1359	3	2.9813
9030617O03Rik	3	0.97615	0.97075	0.993199	18751	0	3.0859	0.023854	0.066428	0.999379	1360	3	3.0859
Slc44a3	4	0.97614	0.96573	0.992256	18748	0	3.8859	0.023863	0.086154	0.999379	1361	4	3.8859
Tnfrsf1b	4	0.97614	0.96573	0.992256	18747	0	3.2762	0.023863	0.086154	0.999379	1362	4	3.2762
Ptcd2	4	0.97614	0.96573	0.992256	18750	0	2.8114	0.023863	0.086154	0.999379	1363	4	2.8114
Bag3	4	0.37534	0.49708	0.945217	9441	2	1.4645	0.023902	0.086299	0.999379	1364	2	1.4645
Cep55	4	0.50645	0.56697	0.955227	10959	1	3.4884	0.023904	0.086299	0.999379	1365	3	3.4884
Mis12	2	0.97609	0.97238	0.993379	18746	0	5.7299	0.023914	0.045091	0.999379	1366	2	5.7299
Hsf5	3	0.52736	0.52445	0.945217	11218	1	0.42267	0.023947	0.066428	0.999379	1367	1	0.42267
Pnma2	4	0.85665	0.83199	0.965375	16538	0	0.67449	0.023958	0.086299	0.999379	1368	2	0.67449
Olfr215	4	0.96195	0.9473	0.987282	18487	0	3.6155	0.023976	0.086299	0.999379	1369	4	3.6155
Ankra2	4	0.8984	0.88153	0.97356	17315	0	4.4791	0.024006	0.0863	0.999379	1370	3	4.4791
Dbp	4	0.5153	0.57609	0.956086	11080	1	1.8529	0.024015	0.0863	0.999379	1371	3	1.8529
Gabpb2	4	0.96978	0.95797	0.990638	18626	0	4.1295	0.024045	0.0863	0.999379	1372	4	4.1295
Ift52	4	0.92541	0.90105	0.97513	17803	0	3.5745	0.024073	0.0863	0.999379	1373	3	3.5745
Dock10	4	0.97582	0.96555	0.992256	18745	0	2.0659	0.024178	0.086561	0.999379	1374	4	2.0659
Alkbh6	4	0.2636	0.38752	0.945217	7311	2	-0.29358	0.024185	0.086561	0.999379	1375	1	-0.29358
Gngt2	4	0.9758	0.96555	0.992256	18744	0	2.5415	0.024202	0.086561	0.999379	1376	4	2.5415
Syt14	4	0.39478	0.51663	0.945217	9749	1	3.1456	0.024225	0.086822	0.999379	1377	2	3.1456
Cyp4a32	4	0.57579	0.61051	0.956086	11884	1	1.2613	0.024241	0.086822	0.999379	1378	2	1.2613
Lrrc9	4	0.52224	0.58105	0.956086	11144	1	3.9853	0.02425	0.086822	0.999379	1379	3	3.9853
Lhfpl4	4	0.92178	0.89768	0.97356	17721	0	1.9939	0.024298	0.087093	0.999379	1380	3	1.9939
Tmem106b	4	0.37517	0.49708	0.945217	9438	2	2.8096	0.02432	0.087093	0.999379	1381	2	2.8096
Cox17	2	0.34096	0.34658	0.945217	8770	1	3.7674	0.024329	0.045437	0.999379	1382	1	3.7674
Lamc3	4	0.75862	0.74139	0.962274	14634	1	4.2641	0.02433	0.087093	0.999379	1383	3	4.2641
Zfp503	4	0.87861	0.85194	0.967491	16934	0	3.4215	0.024351	0.087093	0.999379	1384	3	3.4215
Map1b	4	0.86628	0.84482	0.967185	16714	0	1.538	0.024354	0.087093	0.999379	1385	3	1.538
Olfr518	4	0.97564	0.96491	0.992256	18743	0	2.7333	0.024362	0.087093	0.999379	1386	4	2.7333
Serpina3b	4	0.70065	0.69472	0.962274	13640	1	4.1057	0.024385	0.087094	0.999379	1387	3	4.1057
Fam170b	4	0.011105	0.02591	0.73103	657	1	0.71952	0.024411	0.087094	0.999379	1388	2	0.71952
Myl7	4	0.97559	0.96491	0.992256	18742	0	3.7735	0.024412	0.087094	0.999379	1389	4	3.7735
Tbxa2r	4	0.97556	0.96491	0.992256	18741	0	3.7353	0.024437	0.087094	0.999379	1390	4	3.7353
Hoxa4	4	0.97553	0.96491	0.992256	18740	0	4.4052	0.024469	0.087357	0.999379	1391	4	4.4052
Arhgef17	4	0.97551	0.96491	0.992256	18738	0	4.4764	0.024494	0.087357	0.999379	1392	4	4.4764
Tmem19	4	0.96567	0.95177	0.987706	18553	0	2.7764	0.024524	0.087357	0.999379	1393	4	2.7764
Nlrp2	4	0.97545	0.96491	0.992256	18737	0	2.0554	0.024551	0.087357	0.999379	1394	4	2.0554
Fam26d	4	0.70065	0.69472	0.962274	13616	1	0.96826	0.024581	0.087357	0.999379	1395	2	0.96826
Fam150b	4	0.7319	0.72467	0.962274	14180	1	4.0236	0.024584	0.087357	0.999379	1396	3	4.0236
Ppp2r5e	4	0.028816	0.069361	0.803581	1405	1	2.1603	0.024612	0.08785	0.999379	1397	2	2.1603
Hist1h4a	2	0.62139	0.58949	0.956086	12479	0	3.033	0.024614	0.045757	0.999379	1398	1	3.033
Dio1	3	0.50011	0.50844	0.945217	10897	1	4.9244	0.024614	0.06764	0.999379	1399	2	4.9244
Kcns2	4	0.91782	0.89533	0.97356	17660	0	4.5757	0.024636	0.08785	0.999379	1400	3	4.5757
Tcf25	4	0.95603	0.94151	0.986321	18375	0	4.0996	0.024641	0.08785	0.999379	1401	4	4.0996
A530099J19Rik	3	0.71243	0.6891	0.962274	13855	0	5.686	0.024651	0.06764	0.999379	1402	2	5.686
Defa20	3	0.9113	0.88788	0.97356	17517	0	5.0864	0.024688	0.06764	0.999379	1403	3	5.0864
Olfr671	4	0.58958	0.6174	0.956086	12049	1	0.93059	0.024694	0.087851	0.999379	1404	2	0.93059
Rbm39	1	0.9753	0.97473	0.994415	18736	0	7.2919	0.024702	0.025267	0.999379	1405	1	7.2919
Gsap	4	0.95696	0.94252	0.986321	18386	0	3.7653	0.024704	0.087851	0.999379	1406	4	3.7653
Slc9a6	4	0.97529	0.96491	0.992256	18735	0	3.9919	0.024712	0.087851	0.999379	1407	4	3.9919
Gm11565	4	0.29525	0.42473	0.945217	7968	1	1.531	0.02475	0.088346	0.999379	1408	2	1.531
Zc3h13	3	0.90608	0.88342	0.97356	17453	0	2.3738	0.024755	0.067924	0.999379	1409	3	2.3738
Tmem231	4	0.97524	0.96491	0.992256	18734	0	1.2732	0.024759	0.088346	0.999379	1410	4	1.2732
Hipk3	4	0.9369	0.91545	0.978443	18026	0	4.4407	0.024787	0.088587	0.999379	1411	3	4.4407
Six3	3	0.046043	0.076367	0.803581	2089	1	0.072422	0.024797	0.067924	0.999379	1412	1	0.072422
1700123K08Rik	4	0.37074	0.49444	0.945217	9345	1	3.8081	0.024804	0.088587	0.999379	1413	3	3.8081
Myl9	4	0.79388	0.77766	0.963641	15301	0	1.5355	0.024807	0.088587	0.999379	1414	2	1.5355
Poglut1	4	0.97519	0.96491	0.992256	18732	0	3.9894	0.024809	0.088587	0.999379	1415	4	3.9894
Prl3a1	4	0.93992	0.91872	0.978771	18088	0	4.8015	0.024829	0.088587	0.999379	1416	4	4.8015
H2-Q10	3	0.090934	0.14181	0.840768	3572	1	1.5886	0.02484	0.067925	0.999379	1417	2	1.5886
Insl3	4	0.39478	0.51663	0.945217	9744	1	2.0818	0.024863	0.088588	0.999379	1418	2	2.0818
Olfr533	4	0.75435	0.73728	0.962274	14561	1	2.9813	0.024874	0.088588	0.999379	1419	3	2.9813
Glt6d1	4	0.93078	0.90861	0.977646	17906	0	4.1862	0.024894	0.088588	0.999379	1420	3	4.1862
Dnajb14	4	0.94527	0.92722	0.980458	18191	0	3.1632	0.024902	0.088588	0.999379	1421	4	3.1632
Tesk1	4	0.089636	0.16631	0.848976	3539	3	-1.7828	0.02492	0.088588	0.999379	1422	1	-1.7828
Wfdc1	4	0.97503	0.96491	0.992256	18730	0	3.1554	0.024968	0.089102	0.999379	1423	4	3.1554
Fam216a	3	0.97503	0.96916	0.99247	18729	0	4.3989	0.024971	0.068193	0.999379	1424	3	4.3989
Hamp	4	0.92931	0.90723	0.977582	17880	0	4.1501	0.024976	0.089102	0.999379	1425	3	4.1501
Trpa1	4	0.4001	0.51804	0.945217	9815	1	2.9534	0.024977	0.089102	0.999379	1426	3	2.9534
Morc4	4	0.40453	0.52016	0.945217	9869	1	3.1759	0.025033	0.089102	0.999379	1427	3	3.1759
Eml5	3	0.34391	0.40752	0.945217	8854	1	0.7448	0.025052	0.068193	0.999379	1428	1	0.7448
Rgs9bp	3	0.85752	0.82398	0.96485	16574	0	4.7528	0.025056	0.068193	0.999379	1429	2	4.7528
Kctd7	3	0.97492	0.96885	0.99247	18727	0	3.4322	0.025082	0.068468	0.999379	1430	3	3.4322
Jup	4	0.33774	0.46115	0.945217	8720	1	2.6776	0.02509	0.089102	0.999379	1431	3	2.6776
Prss56	4	0.69798	0.69402	0.962274	13561	1	4.223	0.025173	0.089102	0.999379	1432	3	4.223
Pemt	4	0.29702	0.42639	0.945217	7981	2	-0.35834	0.025203	0.089102	0.999379	1433	1	-0.35834
Tex43	4	0.24339	0.36706	0.945217	6904	1	4.3889	0.025255	0.089102	0.999379	1434	3	4.3889
Psg29	4	0.022042	0.059901	0.803581	1128	2	-0.66133	0.025259	0.089382	0.999379	1435	2	-0.66133
Olfr1318	3	0.97471	0.96727	0.992256	18726	0	3.5235	0.02529	0.069837	0.999379	1436	3	3.5235
Olfr398	4	0.23733	0.35891	0.945217	6786	2	2.7251	0.025292	0.089647	0.999379	1437	2	2.7251
Uba6	4	0.97469	0.96457	0.992256	18725	0	2.4921	0.025314	0.089647	0.999379	1438	4	2.4921
Pfn1	1	0.97463	0.9737	0.993804	18724	0	7.9313	0.025365	0.026299	0.999379	1439	1	7.9313
Ripk2	4	0.56567	0.60423	0.956086	11770	1	4.2146	0.025371	0.089648	0.999379	1440	3	4.2146
Abi1	4	0.37478	0.49708	0.945217	9421	2	2.021	0.025372	0.089648	0.999379	1441	2	2.021
Dhrs13	3	0.95119	0.93334	0.983044	18296	0	5.0346	0.025397	0.070277	0.999379	1442	3	5.0346
Dync2h1	3	0.97456	0.96727	0.992256	18723	0	4.9126	0.025412	0.070277	0.999379	1443	3	4.9126
Ttll11	4	0.13466	0.22859	0.906649	4621	2	2.0728	0.025445	0.093236	0.999379	1444	2	2.0728
Stk31	4	0.97453	0.96457	0.992256	18722	0	2.02	0.025472	0.093237	0.999379	1445	4	2.02
Cog7	3	0.89647	0.8724	0.97356	17283	0	2.0223	0.025477	0.070278	0.999379	1446	3	2.0223
Gm8882	4	0.63183	0.63826	0.956086	12601	1	0.46966	0.025485	0.093237	0.999379	1447	2	0.46966
Gkap1	4	0.89341	0.87813	0.97356	17230	0	3.9918	0.025493	0.093237	0.999379	1448	3	3.9918
Ccr2	3	0.97447	0.96727	0.992256	18721	0	2.9184	0.025529	0.070278	0.999379	1449	3	2.9184
Ccdc73	4	0.67638	0.67727	0.962274	13261	1	0.96217	0.025542	0.093745	0.999379	1450	3	0.96217
Zfp575	4	0.97443	0.96457	0.992256	18720	0	2.9695	0.025571	0.093746	0.999379	1451	4	2.9695
Bspry	4	0.97442	0.96457	0.992256	18719	0	1.5325	0.025582	0.093746	0.999379	1452	4	1.5325
Lmcd1	4	0.97441	0.96457	0.992256	18718	0	3.8129	0.025593	0.093746	0.999379	1453	4	3.8129
Rprd2	4	0.84039	0.8161	0.963641	16235	0	1.9714	0.025598	0.093746	0.999379	1454	2	1.9714
Zxdc	4	0.97438	0.96423	0.992256	18717	0	1.5756	0.025623	0.094275	0.999379	1455	4	1.5756
Faf1	2	0.97437	0.96989	0.993009	18716	0	5.573	0.025626	0.049177	0.999379	1456	2	5.573
Tyk2	4	0.86917	0.84534	0.967185	16734	0	2.5529	0.025655	0.094275	0.999379	1457	3	2.5529
Tpr	2	0.97434	0.96989	0.993009	18715	0	5.9975	0.025662	0.049177	0.999379	1458	2	5.9975
Gtpbp8	3	0.9012	0.87869	0.97356	17351	0	6.1415	0.025665	0.070566	0.999379	1459	3	6.1415
BC051019	4	0.090441	0.16742	0.848976	3554	1	4.2821	0.025685	0.094275	0.999379	1460	3	4.2821
Dok6	4	0.7526	0.73587	0.962274	14524	1	4.2286	0.025701	0.094275	0.999379	1461	3	4.2286
Mcpt8	4	0.52224	0.58105	0.956086	11189	1	3.0977	0.025722	0.094275	0.999379	1462	2	3.0977
Ano8	4	0.97426	0.96423	0.992256	18713	0	1.9992	0.025741	0.094275	0.999379	1463	4	1.9992
Gmds	4	0.84262	0.81728	0.963641	16268	0	3.8796	0.025743	0.094275	0.999379	1464	3	3.8796
Taar1	4	0.97425	0.96423	0.992256	18712	0	3.884	0.025748	0.094275	0.999379	1465	4	3.884
Erbb2ip	4	0.46216	0.54045	0.945217	10447	1	2.8229	0.025753	0.094275	0.999379	1466	2	2.8229
Smoc2	3	0.75519	0.72512	0.962274	14578	0	2.9007	0.025775	0.070567	0.999379	1467	2	2.9007
Lcn5	4	0.74225	0.73165	0.962274	14333	1	3.7958	0.025781	0.094275	0.999379	1468	3	3.7958
Cdk10	4	0.9742	0.96423	0.992256	18711	0	1.2164	0.0258	0.094275	0.999379	1469	4	1.2164
Adrbk2	4	0.14119	0.23108	0.906649	4768	1	2.354	0.025815	0.094275	0.999379	1470	2	2.354
Plg	3	0.36416	0.4167	0.945217	9225	1	5.7711	0.025815	0.070859	0.999379	1471	2	5.7711
0610040J01Rik	4	0.63183	0.63826	0.956086	12595	1	2.0827	0.025825	0.094275	0.999379	1472	3	2.0827
Lhcgr	4	0.61307	0.62779	0.956086	12369	1	4.184	0.025829	0.094562	0.999379	1473	3	4.184
Cd3d	4	0.97414	0.96388	0.992256	18710	0	1.5708	0.025856	0.094562	0.999379	1474	4	1.5708
Gabrr3	3	0.16567	0.26283	0.928112	5302	1	4.767	0.025859	0.07127	0.999379	1475	2	4.767
S100a6	4	0.83498	0.80996	0.963641	16117	0	4.2958	0.025878	0.094562	0.999379	1476	3	4.2958
Gli1	4	0.75936	0.74139	0.962274	14653	1	3.1535	0.025897	0.094562	0.999379	1477	3	3.1535
Prkcz	4	0.37895	0.50053	0.945217	9513	1	4.5976	0.026017	0.094562	0.999379	1478	3	4.5976
Clrn1	3	0.28533	0.38025	0.945217	7767	1	1.4181	0.026029	0.071271	0.999379	1479	2	1.4181
Npl	4	0.024015	0.061944	0.803581	1208	1	1.5905	0.026051	0.094563	0.999379	1480	3	1.5905
Vmn1r233	4	0.62708	0.63549	0.956086	12552	1	3.7381	0.02606	0.094563	0.999379	1481	3	3.7381
Hdx	4	0.97393	0.96388	0.992256	18708	0	2.8201	0.026072	0.094563	0.999379	1482	4	2.8201
Zrsr1	4	0.97391	0.96388	0.992256	18707	0	1.6114	0.026091	0.094563	0.999379	1483	4	1.6114
Ranbp1	4	0.9174	0.89457	0.97356	17651	0	1.8882	0.026107	0.094563	0.999379	1484	3	1.8882
Irx1	4	0.97388	0.96388	0.992256	18706	0	1.3698	0.026124	0.094563	0.999379	1485	4	1.3698
Vmn1r89	3	0.97386	0.96661	0.992256	18704	0	4.8054	0.026144	0.071271	0.999379	1486	3	4.8054
Asb18	4	0.2636	0.38752	0.945217	7350	2	0.2819	0.026164	0.094563	0.999379	1487	2	0.2819
Fam20a	4	0.97383	0.96388	0.992256	18703	0	3.6383	0.026173	0.094563	0.999379	1488	4	3.6383
Trim34a	4	0.97382	0.96388	0.992256	18702	0	2.897	0.026184	0.094563	0.999379	1489	4	2.897
Snx4	4	0.3321	0.45851	0.945217	8614	1	3.7539	0.026208	0.094563	0.999379	1490	3	3.7539
Adgrb1	4	0.97379	0.96388	0.992256	18701	0	1.6862	0.026214	0.094563	0.999379	1491	4	1.6862
Ssna1	4	0.019537	0.04914	0.803581	1021	1	3.6364	0.026228	0.094563	0.999379	1492	3	3.6364
Pax1	4	0.77572	0.75261	0.962274	14951	1	4.0488	0.02626	0.094563	0.999379	1493	3	4.0488
4930430A15Rik	4	0.97373	0.96355	0.992256	18700	0	2.1142	0.026275	0.094836	0.999379	1494	4	2.1142
Hoxa2	4	0.97028	0.95836	0.990638	18631	0	4.1778	0.026291	0.094836	0.999379	1495	4	4.1778
Higd2a	3	0.9737	0.96628	0.992256	18699	0	5.1598	0.026301	0.071952	0.999379	1496	3	5.1598
Csf1r	4	0.81019	0.78977	0.963641	15627	0	3.7687	0.026314	0.094837	0.999379	1497	3	3.7687
Manf	4	0.7732	0.75054	0.962274	14897	1	4.4378	0.026342	0.095351	0.999379	1498	3	4.4378
Foxr1	4	0.97366	0.96355	0.992256	18698	0	2.0449	0.026342	0.095351	0.999379	1499	4	2.0449
Fdxacb1	4	0.87412	0.84793	0.967185	16847	0	4.1691	0.02639	0.095351	0.999379	1500	3	4.1691
Ncr1	4	0.30183	0.4318	0.945217	8072	2	2.6681	0.026436	0.095352	0.999379	1501	2	2.6681
Tcte3	4	0.03242	0.07557	0.803581	1563	1	3.0095	0.026446	0.095352	0.999379	1502	3	3.0095
Efs	4	0.70301	0.6996	0.962274	13683	1	4.6614	0.026488	0.095352	0.999379	1503	3	4.6614
Agap3	4	0.045537	0.092478	0.803581	2072	1	3.0314	0.026509	0.095352	0.999379	1504	2	3.0314
Gm13078	4	0.97347	0.96317	0.992256	18697	0	2.6995	0.026531	0.096188	0.999379	1505	4	2.6995
Pbx1	4	0.87204	0.84585	0.967185	16803	0	4.146	0.02657	0.096188	0.999379	1506	3	4.146
Sh3bgrl2	4	0.015612	0.038313	0.803581	852	1	4.2498	0.026581	0.096188	0.999379	1507	3	4.2498
Zfp872	4	0.95018	0.93421	0.983044	18271	0	3.7072	0.026619	0.096188	0.999379	1508	4	3.7072
Psme3	4	0.97337	0.96317	0.992256	18695	0	2.8698	0.026626	0.096188	0.999379	1509	4	2.8698
AI314180	3	0.4828	0.50005	0.945217	10692	1	5.6361	0.026699	0.074775	0.999379	1510	2	5.6361
Stk32b	4	0.95985	0.94545	0.986989	18438	0	2.537	0.026728	0.096758	0.999379	1511	4	2.537
Shcbp1	4	0.97326	0.96279	0.992256	18693	0	2.5246	0.026742	0.096758	0.999379	1512	4	2.5246
Eng	4	0.55916	0.6007	0.956086	11663	1	1.7651	0.026785	0.096759	0.999379	1513	2	1.7651
Sars2	1	0.97319	0.97266	0.993401	18692	0	7.3188	0.026806	0.027339	0.999379	1514	1	7.3188
Trpc4ap	4	0.52224	0.58105	0.956086	11171	1	2.8578	0.026886	0.097061	0.999379	1515	2	2.8578
Fkbp6	3	0.26316	0.36496	0.945217	7304	1	5.5739	0.02692	0.075053	0.999379	1516	2	5.5739
Ero1l	4	0.71229	0.70942	0.962274	13844	1	0.8676	0.026954	0.097061	0.999379	1517	2	0.8676
Cadm4	4	0.97304	0.96243	0.992129	18691	0	2.595	0.026962	0.097061	0.999379	1518	4	2.595
Cmklr1	3	0.7446	0.71637	0.962274	14402	0	0.78221	0.026963	0.075467	0.999379	1519	2	0.78221
Adgre4	4	0.57403	0.61051	0.956086	11857	1	0.27489	0.027011	0.097061	0.999379	1520	1	0.27489
Nxpe3	4	0.94527	0.92722	0.980458	18193	0	4.6073	0.027019	0.097061	0.999379	1521	4	4.6073
Fam214b	4	0.95875	0.94349	0.986444	18420	0	4.799	0.027049	0.097061	0.999379	1522	4	4.799
Eif4b	4	0.79236	0.77632	0.963641	15267	0	2.0877	0.027067	0.097061	0.999379	1523	3	2.0877
Nup188	4	0.97291	0.96243	0.992129	18690	0	1.5041	0.027089	0.097061	0.999379	1524	4	1.5041
Rcor1	4	0.9729	0.96243	0.992129	18689	0	1.4505	0.027102	0.097061	0.999379	1525	4	1.4505
Nckap1	4	0.35335	0.47812	0.945217	9014	2	2.0431	0.027107	0.097061	0.999379	1526	2	2.0431
Ackr2	4	0.35335	0.47812	0.945217	9032	2	1.3341	0.027124	0.097061	0.999379	1527	2	1.3341
Mbd2	4	0.011041	0.025762	0.73103	654	2	1.622	0.027191	0.097061	0.999379	1528	2	1.622
Tmem198	3	0.97277	0.96596	0.992256	18688	0	2.614	0.027233	0.075468	0.999379	1529	3	2.614
Kansl1l	3	0.97272	0.96596	0.992256	18686	0	4.4483	0.02728	0.075468	0.999379	1530	3	4.4483
Myl4	4	0.38627	0.51056	0.945217	9647	1	2.5886	0.027293	0.097061	0.999379	1531	2	2.5886
Osgin2	3	0.26404	0.36496	0.945217	7393	1	5.382	0.027295	0.075468	0.999379	1532	2	5.382
D730048I06Rik	3	0.97267	0.96596	0.992256	18685	0	3.2808	0.027331	0.075882	0.999379	1533	3	3.2808
3425401B19Rik	4	0.97266	0.96205	0.992038	18684	0	1.9607	0.027336	0.097375	0.999379	1534	4	1.9607
Mmp19	4	0.52224	0.58105	0.956086	11165	1	1.7051	0.027349	0.097375	0.999379	1535	3	1.7051
Peli3	4	0.1984	0.30562	0.945217	5951	1	2.9952	0.027371	0.097375	0.999379	1536	3	2.9952
Rfwd2	2	0.85207	0.82048	0.96423	16436	0	5.2765	0.027401	0.051286	0.999379	1537	2	5.2765
Rchy1	4	0.94675	0.92842	0.981192	18216	0	3.7611	0.027401	0.097375	0.999379	1538	4	3.7611
Axl	3	0.47436	0.49393	0.945217	10593	1	4.6889	0.027403	0.078566	0.999379	1539	2	4.6889
Kcne2	4	0.97259	0.96205	0.992038	18683	0	2.4757	0.027413	0.097375	0.999379	1540	4	2.4757
Fap	4	0.57724	0.61051	0.956086	11892	1	3.3997	0.027429	0.097375	0.999379	1541	3	3.3997
Ralgps2	4	0.80913	0.78977	0.963641	15601	0	0.55535	0.027462	0.097375	0.999379	1542	2	0.55535
Ifna14	3	0.97251	0.96528	0.992256	18682	0	4.8752	0.027488	0.078857	0.999379	1543	3	4.8752
Pfkp	4	0.011391	0.026209	0.73103	667	1	2.3377	0.027498	0.097375	0.999379	1544	2	2.3377
Pcdha7	4	0.97246	0.96205	0.992038	18680	0	2.5274	0.027544	0.097375	0.999379	1545	4	2.5274
Fbln5	3	0.052298	0.085318	0.803581	2329	2	-1.627	0.027558	0.078858	0.999379	1546	1	-1.627
Xk	4	0.61307	0.62779	0.956086	12364	1	0.39868	0.027575	0.097375	0.999379	1547	2	0.39868
Pla2g7	4	0.25397	0.37769	0.945217	7160	1	3.1576	0.02758	0.097375	0.999379	1548	3	3.1576
Timp2	4	0.97238	0.96168	0.991923	18678	0	3.3712	0.027616	0.097683	0.999379	1549	4	3.3712
Klri2	3	0.97234	0.9646	0.992256	18677	0	3.8666	0.027662	0.07944	0.999379	1550	3	3.8666
Myrf	2	0.97234	0.96911	0.99247	18676	0	4.2481	0.027662	0.051653	0.999379	1551	2	4.2481
Apol6	4	0.84843	0.82309	0.96423	16381	0	4.2539	0.027678	0.097975	0.999379	1552	3	4.2539
Tdpoz1	4	0.056093	0.10941	0.820481	2438	2	0.45052	0.027688	0.097975	0.999379	1553	2	0.45052
Mmachc	3	0.5094	0.51302	0.945217	10987	1	5.4276	0.027689	0.079739	0.999379	1554	2	5.4276
Poll	4	0.33813	0.46115	0.945217	8734	2	2.4155	0.027689	0.097975	0.999379	1555	2	2.4155
Tspan9	4	0.6235	0.63408	0.956086	12512	1	3.7714	0.027721	0.097975	0.999379	1556	3	3.7714
Olfr487	4	0.2792	0.40588	0.945217	7652	1	1.796	0.027801	0.097976	0.999379	1557	3	1.796
Nup35	4	0.97219	0.96132	0.991673	18675	0	2.7739	0.027808	0.097976	0.999379	1558	4	2.7739
Arid5b	3	0.7217	0.69411	0.962274	13991	0	3.5574	0.027812	0.080577	0.999379	1559	2	3.5574
Sema6c	3	0.47436	0.49393	0.945217	10592	1	3.3556	0.027854	0.080577	0.999379	1560	2	3.3556
Defa25	4	0.066975	0.12937	0.838017	2799	1	-1.0884	0.027857	0.097976	0.999379	1561	1	-1.0884
Thoc6	1	0.97211	0.97057	0.993199	18674	0	7.9932	0.027887	0.029435	0.999379	1562	1	7.9932
Golph3	4	0.9721	0.96132	0.991673	18673	0	2.755	0.027898	0.097976	0.999379	1563	4	2.755
Cd164l2	3	0.26874	0.36723	0.945217	7454	1	4.8306	0.027914	0.080578	0.999379	1564	2	4.8306
Commd2	4	0.58485	0.61604	0.956086	12010	1	4.8046	0.027955	0.10146	0.999379	1565	3	4.8046
Echdc2	3	0.84319	0.81488	0.963641	16281	0	5.3513	0.027991	0.080876	0.999379	1566	2	5.3513
Cdkn2aip	4	0.97201	0.96132	0.991673	18672	0	1.9457	0.027993	0.10146	0.999379	1567	4	1.9457
Prss57	2	0.81635	0.78026	0.963641	15723	0	4.3806	0.027998	0.052328	0.999379	1568	2	4.3806
Nthl1	4	0.86064	0.83416	0.966196	16597	0	2.0613	0.028083	0.10209	0.999379	1569	2	2.0613
Fbxw5	4	0.84897	0.82422	0.96485	16390	0	4.3955	0.028094	0.10209	0.999379	1570	3	4.3955
Cacna1d	3	0.74757	0.71909	0.962274	14439	0	1.1501	0.028109	0.08162	0.999379	1571	2	1.1501
Rhox2h	4	0.97186	0.96018	0.990809	18670	0	2.0692	0.028139	0.10263	0.999379	1572	4	2.0692
Chrna2	4	0.94465	0.92666	0.980458	18179	0	3.6084	0.028139	0.10263	0.999379	1573	4	3.6084
Cc2d1b	4	0.2742	0.39862	0.945217	7557	2	2.3423	0.028148	0.10263	0.999379	1574	2	2.3423
Rsph4a	4	0.97182	0.96018	0.990809	18669	0	2.9985	0.02818	0.10263	0.999379	1575	4	2.9985
Hspa12b	4	0.97181	0.96018	0.990809	18668	0	3.6348	0.02819	0.10263	0.999379	1576	4	3.6348
Angpt1	4	0.91153	0.89139	0.97356	17565	0	2.1997	0.028196	0.10263	0.999379	1577	3	2.1997
Tifab	4	0.97178	0.96018	0.990809	18667	0	3.7088	0.028222	0.10263	0.999379	1578	4	3.7088
Olfr43	3	0.13103	0.19536	0.876997	4552	1	0.95935	0.028236	0.08162	0.999379	1579	2	0.95935
Ccl20	4	0.60521	0.62433	0.956086	12243	1	3.3044	0.028244	0.10294	0.999379	1580	3	3.3044
Olfr1032	4	0.97173	0.9598	0.990638	18666	0	3.1112	0.028266	0.10318	0.999379	1581	4	3.1112
Olfr1196	4	0.97173	0.9598	0.990638	18665	0	2.8797	0.02827	0.10318	0.999379	1582	4	2.8797
Pepd	4	0.9717	0.9598	0.990638	18664	0	2.9042	0.028301	0.10318	0.999379	1583	4	2.9042
Rogdi	4	0.96669	0.95221	0.987706	18571	0	4.2903	0.02832	0.10318	0.999379	1584	4	4.2903
Bcl2l14	4	0.30922	0.43999	0.945217	8194	2	2.3061	0.028341	0.10318	0.999379	1585	2	2.3061
Cyb561d1	4	0.22731	0.35466	0.945217	6555	2	0.54385	0.028365	0.10318	0.999379	1586	2	0.54385
Olfr594	4	0.85665	0.83199	0.965375	16545	0	3.8056	0.028368	0.10318	0.999379	1587	3	3.8056
Olfr1176	3	0.37	0.4167	0.945217	9317	1	5.19	0.028421	0.082047	0.999379	1588	2	5.19
Ugt3a2	4	0.066542	0.12821	0.838017	2786	3	-0.91679	0.028421	0.10318	0.999379	1589	1	-0.91679
Olfr557	4	0.92178	0.89768	0.97356	17764	0	4.127	0.02843	0.10318	0.999379	1590	3	4.127
Ddias	4	0.97157	0.9598	0.990638	18663	0	2.7098	0.028431	0.10318	0.999379	1591	4	2.7098
Cmtr2	3	0.39078	0.42887	0.945217	9703	1	3.5004	0.028491	0.082047	0.999379	1592	2	3.5004
Cela2a	4	0.84415	0.81848	0.963641	16299	0	3.5792	0.028493	0.10318	0.999379	1593	3	3.5792
Oas1h	4	0.78507	0.76101	0.963641	15116	1	-0.012131	0.028534	0.10318	0.999379	1594	2	-0.012131
Nkx2-2	4	0.97143	0.9598	0.990638	18662	0	3.7511	0.028575	0.10342	0.999379	1595	4	3.7511
Lrrtm2	4	0.48853	0.55294	0.945217	10768	1	2.3897	0.028578	0.10342	0.999379	1596	2	2.3897
Cadps2	4	0.06478	0.12283	0.826231	2735	2	-1.0802	0.028591	0.10342	0.999379	1597	2	-1.0802
Zfp655	2	0.57374	0.54594	0.945217	11838	0	3.3875	0.028594	0.054756	0.999379	1598	1	3.3875
Atxn1l	4	0.69931	0.69402	0.962274	13614	1	2.0449	0.028647	0.10342	0.999379	1599	2	2.0449
Ptpn13	2	0.96704	0.96529	0.992256	18577	0	5.2722	0.028679	0.055114	0.999379	1600	2	5.2722
H2-Ob	4	0.97131	0.9598	0.990638	18659	0	1.7845	0.028693	0.10342	0.999379	1601	4	1.7845
Kdelc1	4	0.97129	0.95944	0.990638	18658	0	2.8316	0.028713	0.10372	0.999379	1602	4	2.8316
Gsta3	4	0.97125	0.95944	0.990638	18657	0	3.0291	0.02875	0.10372	0.999379	1603	4	3.0291
Mex3c	4	0.13035	0.22223	0.906649	4536	1	3.4213	0.028751	0.10372	0.999379	1604	3	3.4213
Ppme1	4	0.80494	0.78519	0.963641	15534	0	3.4726	0.028772	0.10372	0.999379	1605	3	3.4726
Gm6890	3	0.54697	0.54581	0.945217	11519	1	1.0939	0.028787	0.082341	0.999379	1606	2	1.0939
Slc28a3	4	0.91669	0.89457	0.97356	17634	0	3.0321	0.028813	0.10396	0.999379	1607	3	3.0321
Rbpj	4	0.97118	0.95944	0.990638	18656	0	0.97987	0.028818	0.10396	0.999379	1608	4	0.97987
Lrrn1	4	0.13997	0.23023	0.906649	4721	2	0.63179	0.028873	0.10396	0.999379	1609	2	0.63179
Asap3	4	0.97112	0.95944	0.990638	18654	0	2.4134	0.028878	0.10396	0.999379	1610	4	2.4134
Trim30a	4	0.78664	0.76242	0.963641	15181	1	3.4523	0.028899	0.10396	0.999379	1611	3	3.4523
Pcdhb18	4	0.97109	0.95944	0.990638	18653	0	4.5884	0.028907	0.1042	0.999379	1612	4	4.5884
Nrxn1	4	0.097404	0.18166	0.868566	3784	2	-0.59271	0.028929	0.1042	0.999379	1613	2	-0.59271
Xkr8	4	0.97103	0.95944	0.990638	18652	0	1.6073	0.028967	0.1042	0.999379	1614	4	1.6073
Crip2	4	0.97102	0.95944	0.990638	18651	0	1.7391	0.028976	0.1042	0.999379	1615	4	1.7391
Krba1	4	0.80494	0.78519	0.963641	15530	0	-0.082914	0.028985	0.1042	0.999379	1616	1	-0.082914
Acaa2	3	0.82383	0.80007	0.963641	15907	0	0.395	0.028999	0.082652	0.999379	1617	2	0.395
1110008F13Rik	4	0.97098	0.95944	0.990638	18650	0	3.46	0.02902	0.1042	0.999379	1618	4	3.46
Ncs1	4	0.02081	0.053621	0.803581	1077	2	0.24144	0.029042	0.1042	0.999379	1619	2	0.24144
Tnfrsf13b	4	0.97094	0.95944	0.990638	18649	0	2.7645	0.029057	0.10472	0.999379	1620	4	2.7645
Tada2a	3	0.78247	0.75309	0.962274	15061	0	1.3685	0.029084	0.082652	0.999379	1621	2	1.3685
Pou3f2	4	0.7763	0.75261	0.962274	14963	1	3.0358	0.0291	0.10472	0.999379	1622	3	3.0358
Rab3c	4	0.9709	0.95944	0.990638	18648	0	2.5653	0.029101	0.10472	0.999379	1623	4	2.5653
Commd8	4	0.97089	0.95944	0.990638	18647	0	3.5624	0.029105	0.10472	0.999379	1624	4	3.5624
Slc25a30	4	0.31828	0.44542	0.945217	8353	1	4.2198	0.029108	0.10472	0.999379	1625	3	4.2198
Krt17	4	0.332	0.45795	0.945217	8610	2	2.4358	0.029119	0.10502	0.999379	1626	2	2.4358
Wdtc1	4	0.97084	0.95908	0.990638	18646	0	2.8563	0.029162	0.10502	0.999379	1627	4	2.8563
Spag6	3	0.97079	0.96249	0.992129	18645	0	3.8174	0.029212	0.08295	0.999379	1628	3	3.8174
Olfr1496	4	0.37895	0.50053	0.945217	9500	1	1.6066	0.029261	0.10502	0.999379	1629	2	1.6066
Cdhr5	3	0.9189	0.89651	0.97356	17679	0	4.632	0.029289	0.08295	0.999379	1630	3	4.632
Nrep	4	0.9707	0.95908	0.990638	18642	0	2.1066	0.029305	0.10554	0.999379	1631	4	2.1066
Gimap5	4	0.89372	0.87813	0.97356	17236	0	3.2863	0.029314	0.10554	0.999379	1632	3	3.2863
Tnfsf13	4	0.90831	0.88902	0.97356	17491	0	3.9321	0.029337	0.10554	0.999379	1633	3	3.9321
Gstcd	3	0.97004	0.96063	0.99117	18628	0	5.3207	0.029338	0.083292	0.999379	1634	3	5.3207
Mgat2	4	0.97065	0.95908	0.990638	18641	0	3.1327	0.02935	0.10554	0.999379	1635	4	3.1327
Ankrd13d	4	0.1617	0.2556	0.919267	5220	1	3.9542	0.029359	0.10554	0.999379	1636	3	3.9542
Tmem184b	3	0.97063	0.96209	0.992038	18640	0	3.4579	0.029368	0.083292	0.999379	1637	3	3.4579
Hist1h1a	4	0.34599	0.46912	0.945217	8888	1	3.3373	0.029392	0.10581	0.999379	1638	2	3.3373
CK137956	3	0.67349	0.64718	0.960732	13224	1	5.0751	0.0294	0.083611	0.999379	1639	2	5.0751
Gpr160	4	0.74225	0.73165	0.962274	14380	1	3.638	0.029401	0.10609	0.999379	1640	3	3.638
Slc16a5	3	0.21399	0.3207	0.945217	6305	1	4.8347	0.029424	0.083611	0.999379	1641	2	4.8347
Olfr177	4	0.16261	0.25669	0.919903	5231	1	-0.64884	0.029436	0.10638	0.999379	1642	1	-0.64884
Nrgn	4	0.78561	0.76241	0.963641	15125	1	3.5591	0.029457	0.10638	0.999379	1643	3	3.5591
1700066B19Rik	3	0.97054	0.96172	0.991923	18638	0	4.3419	0.029463	0.083612	0.999379	1644	3	4.3419
Tmem209	4	0.95184	0.93744	0.984724	18317	0	2.1717	0.029493	0.10663	0.999379	1645	4	2.1717
Gm10229	4	0.17667	0.27862	0.939208	5545	2	2.2331	0.029501	0.10663	0.999379	1646	2	2.2331
Ndc1	4	0.97048	0.95873	0.990638	18637	0	0.9928	0.029522	0.10663	0.999379	1647	4	0.9928
Mup19	2	0.97047	0.96686	0.992256	18636	0	4.3267	0.029533	0.058929	0.999379	1648	2	4.3267
Fam110a	4	0.97045	0.95873	0.990638	18635	0	2.4296	0.029548	0.10663	0.999379	1649	4	2.4296
Mtch1	4	0.21123	0.32819	0.945217	6217	1	1.4876	0.029549	0.10663	0.999379	1650	3	1.4876
Nuak1	3	0.97044	0.96172	0.991923	18634	0	3.5244	0.029558	0.08404	0.999379	1651	3	3.5244
Chit1	3	0.47028	0.49087	0.945217	10542	1	4.3244	0.029583	0.08404	0.999379	1652	2	4.3244
Nupr1l	4	0.93957	0.91872	0.978771	18084	0	1.909	0.029605	0.10664	0.999379	1653	3	1.909
F830045P16Rik	4	0.71229	0.70942	0.962274	13776	1	3.3938	0.029632	0.10694	0.999379	1654	3	3.3938
Cela3a	4	0.38587	0.50872	0.945217	9643	1	3.9196	0.029654	0.10694	0.999379	1655	3	3.9196
Klf8	4	0.88759	0.86928	0.97356	17108	0	0.83961	0.029662	0.10694	0.999379	1656	2	0.83961
Mdk	4	0.97032	0.95836	0.990638	18633	0	2.942	0.029678	0.10694	0.999379	1657	4	2.942
Gcc1	3	0.97029	0.96098	0.991484	18632	0	3.97	0.029707	0.08467	0.999379	1658	3	3.97
Rlim	3	0.6432	0.62831	0.956086	12805	1	2.7362	0.02972	0.08467	0.999379	1659	2	2.7362
Etnppl	3	0.60716	0.6018	0.956086	12304	1	5.1821	0.029767	0.084974	0.999379	1660	2	5.1821
Mpv17l	3	0.89371	0.86677	0.97356	17235	0	0.84586	0.029804	0.084974	0.999379	1661	3	0.84586
Nasp	4	0.01823	0.046578	0.803581	964	1	4.4063	0.029815	0.10694	0.999379	1662	3	4.4063
Evi5	4	0.31929	0.44656	0.945217	8374	1	3.9029	0.029819	0.10694	0.999379	1663	3	3.9029
Esp8	4	0.75916	0.74139	0.962274	14649	1	3.4399	0.029831	0.10694	0.999379	1664	3	3.4399
Smarcad1	3	0.1022	0.15981	0.848976	3939	1	4.723	0.029879	0.084974	0.999379	1665	2	4.723
Il10	4	0.77781	0.75261	0.962274	14988	1	3.9371	0.029897	0.10726	0.999379	1666	3	3.9371
Dpp6	4	0.97007	0.95797	0.990638	18629	0	3.3063	0.029926	0.10726	0.999379	1667	4	3.3063
Wnt2b	4	0.96033	0.94545	0.986989	18451	0	3.5608	0.02994	0.10726	0.999379	1668	4	3.5608
Mboat4	4	0.11286	0.19981	0.876997	4151	2	2.2735	0.029951	0.10726	0.999379	1669	2	2.2735
Adam3	4	0.3512	0.47408	0.945217	8965	1	3.8208	0.029962	0.10726	0.999379	1670	3	3.8208
Cpz	3	0.11631	0.17434	0.85877	4244	1	2.0139	0.029974	0.084974	0.999379	1671	2	2.0139
Helb	4	0.77189	0.7485	0.962274	14883	1	3.6843	0.029997	0.10726	0.999379	1672	3	3.6843
Scnn1b	4	0.61781	0.6299	0.956086	12427	1	2.7629	0.03	0.10726	0.999379	1673	3	2.7629
Usp28	4	0.96827	0.95434	0.988706	18601	0	2.7725	0.030003	0.10726	0.999379	1674	4	2.7725
Tgds	4	0.96995	0.95797	0.990638	18627	0	1.7568	0.030049	0.10753	0.999379	1675	4	1.7568
BC048502	4	0.77759	0.75261	0.962274	14984	1	3.0598	0.030169	0.10753	0.999379	1676	3	3.0598
Smad3	4	0.042696	0.087459	0.803581	1954	1	2.044	0.030225	0.10753	0.999379	1677	3	2.044
Creg2	4	0.9697	0.95797	0.990638	18624	0	1.7236	0.030301	0.10753	0.999379	1678	4	1.7236
Tcam1	4	0.9697	0.95797	0.990638	18625	0	2.9332	0.030301	0.10753	0.999379	1679	4	2.9332
Dpysl4	4	0.96967	0.95797	0.990638	18623	0	1.5324	0.03033	0.10809	0.999379	1680	4	1.5324
Ada	4	0.27924	0.40638	0.945217	7666	2	1.239	0.030338	0.10809	0.999379	1681	2	1.239
Mum1l1	4	0.9268	0.90365	0.976462	17832	0	3.7658	0.030375	0.10835	0.999379	1682	3	3.7658
Ube2ql1	4	0.48853	0.55294	0.945217	10760	1	3.6346	0.030382	0.10835	0.999379	1683	3	3.6346
Cd59a	4	0.5153	0.57609	0.956086	11075	1	3.7648	0.030393	0.10835	0.999379	1684	3	3.7648
Map1lc3b	4	0.60084	0.6229	0.956086	12189	1	2.4833	0.030394	0.10835	0.999379	1685	3	2.4833
Cdk2	4	0.63183	0.63826	0.956086	12656	1	1.4425	0.030404	0.10835	0.999379	1686	2	1.4425
Vmn1r44	3	0.064541	0.10389	0.811199	2716	1	1.7701	0.03044	0.085905	0.999379	1687	2	1.7701
Aadac	4	0.96954	0.95797	0.990638	18621	0	2.0019	0.030465	0.10835	0.999379	1688	4	2.0019
Vps52	3	0.96951	0.95954	0.990638	18620	0	4.6299	0.030486	0.085905	0.999379	1689	3	4.6299
Nhlh2	4	0.93627	0.91545	0.978443	18011	0	3.6835	0.030487	0.10868	0.999379	1690	3	3.6835
Timm50	2	0.9695	0.96686	0.992256	18619	0	5.175	0.030496	0.058929	0.999379	1691	2	5.175
Necab3	4	0.52747	0.58387	0.956086	11246	1	3.9622	0.030523	0.10868	0.999379	1692	3	3.9622
Olfr667	4	0.0099617	0.022689	0.714107	593	1	4.1341	0.030529	0.10868	0.999379	1693	3	4.1341
Prl8a2	4	0.20957	0.32617	0.945217	6199	2	2.0461	0.030537	0.10868	0.999379	1694	2	2.0461
Erich5	4	0.96945	0.95755	0.990638	18618	0	2.6858	0.030549	0.10922	0.999379	1695	4	2.6858
Pithd1	4	0.046233	0.093246	0.803581	2105	2	0.57179	0.030563	0.10922	0.999379	1696	2	0.57179
Olfr1030	4	0.96943	0.95755	0.990638	18617	0	2.1407	0.030565	0.10922	0.999379	1697	4	2.1407
Dnaaf3	4	0.6444	0.64945	0.961883	12821	1	0.78033	0.030619	0.10922	0.999379	1698	2	0.78033
1810043H04Rik	1	0.96935	0.96845	0.99247	18616	0	7.9706	0.030653	0.031553	0.999379	1699	1	7.9706
Klc2	3	0.94749	0.92804	0.981108	18229	0	4.4693	0.03071	0.086622	0.999379	1700	3	4.4693
Arhgef9	4	0.45422	0.53903	0.945217	10362	1	3.0248	0.030788	0.10984	0.999379	1701	3	3.0248
Olfr1297	3	0.87863	0.84782	0.967185	16935	0	2.1595	0.030821	0.087074	0.999379	1702	3	2.1595
Vmn1r172	4	0.89682	0.88025	0.97356	17286	0	1.9841	0.030844	0.10984	0.999379	1703	3	1.9841
Fbxo33	4	0.52224	0.58105	0.956086	11183	1	3.7195	0.030863	0.10984	0.999379	1704	3	3.7195
Slc12a5	4	0.80347	0.78452	0.963641	15494	0	3.5932	0.030893	0.1101	0.999379	1705	3	3.5932
Tmem128	4	0.8859	0.86653	0.97356	17074	0	3.6775	0.030899	0.1101	0.999379	1706	3	3.6775
Lrp2bp	3	0.80091	0.77297	0.963641	15462	0	4.7907	0.030913	0.087074	0.999379	1707	2	4.7907
Olfr765	4	0.32628	0.45468	0.945217	8480	2	-0.61722	0.030957	0.11044	0.999379	1708	1	-0.61722
Aim2	4	0.93619	0.91545	0.978443	18008	0	4.2525	0.031013	0.11076	0.999379	1709	3	4.2525
Stra8	4	0.032126	0.074672	0.803581	1551	2	1.751	0.031013	0.11076	0.999379	1710	2	1.751
Lrrfip2	4	0.96895	0.95595	0.989529	18615	0	3.4014	0.031053	0.11076	0.999379	1711	4	3.4014
Sh3glb1	4	0.41282	0.52228	0.945217	9921	1	1.6087	0.03107	0.11076	0.999379	1712	2	1.6087
Olfr559	4	0.72035	0.71493	0.962274	13963	1	4.2486	0.031095	0.11102	0.999379	1713	3	4.2486
Olfr520	4	0.9689	0.95595	0.989529	18614	0	2.5559	0.031104	0.11102	0.999379	1714	4	2.5559
Zfp462	4	0.96889	0.95595	0.989529	18613	0	2.7411	0.031108	0.11102	0.999379	1715	4	2.7411
Fam117b	4	0.83622	0.81117	0.963641	16136	0	1.367	0.031126	0.11135	0.999379	1716	3	1.367
Scgb2b24	3	0.96884	0.95881	0.990638	18612	0	2.1545	0.031164	0.087825	0.999379	1717	3	2.1545
Flnb	4	0.25955	0.3826	0.945217	7259	1	2.9254	0.031182	0.11135	0.999379	1718	3	2.9254
Mllt11	4	0.96881	0.95554	0.989319	18608	0	2.108	0.031192	0.11135	0.999379	1719	4	2.108
Pcdhb6	4	0.96881	0.95554	0.989319	18610	0	1.7235	0.031192	0.11135	0.999379	1720	4	1.7235
Olfr1380	4	0.96881	0.95554	0.989319	18609	0	1.9848	0.031192	0.11135	0.999379	1721	4	1.9848
Spaca6	4	0.96881	0.95554	0.989319	18611	0	3.6503	0.031192	0.11135	0.999379	1722	4	3.6503
Usp14	3	0.5094	0.51302	0.945217	10989	1	4.5299	0.031207	0.087825	0.999379	1723	2	4.5299
Atat1	3	0.24523	0.35576	0.945217	6954	1	1.8959	0.031244	0.087825	0.999379	1724	2	1.8959
Defb1	4	0.41747	0.52368	0.945217	9986	1	3.9848	0.031244	0.11135	0.999379	1725	3	3.9848
Tas2r115	4	0.53722	0.58737	0.956086	11371	1	4.3285	0.031252	0.11135	0.999379	1726	3	4.3285
Ace2	4	0.34694	0.47025	0.945217	8900	1	1.5678	0.031295	0.11135	0.999379	1727	2	1.5678
Col2a1	3	0.96868	0.95881	0.990638	18607	0	4.8153	0.031319	0.088238	0.999379	1728	3	4.8153
Tnk1	4	0.7638	0.74353	0.962274	14730	1	2.0557	0.031319	0.11135	0.999379	1729	2	2.0557
Sfmbt2	2	0.6805	0.65576	0.962274	13331	0	4.3648	0.031333	0.059645	0.999379	1730	1	4.3648
Gabrq	4	0.79832	0.78177	0.963641	15340	0	0.21796	0.031351	0.11135	0.999379	1731	1	0.21796
Fbxw26	4	0.92178	0.89768	0.97356	17741	0	3.8907	0.031368	0.11135	0.999379	1732	3	3.8907
Cd5l	4	0.79351	0.77766	0.963641	15291	0	2.1908	0.031407	0.11135	0.999379	1733	2	2.1908
Zc3hav1	4	0.93677	0.91545	0.978443	18022	0	3.5036	0.031422	0.11135	0.999379	1734	3	3.5036
Olfr845	4	0.96857	0.95554	0.989319	18606	0	1.8136	0.03143	0.11135	0.999379	1735	4	1.8136
Sh3tc1	4	0.85665	0.83199	0.965375	16534	0	3.1646	0.031463	0.11135	0.999379	1736	3	3.1646
Sft2d3	4	0.32699	0.4558	0.945217	8542	1	3.3433	0.031465	0.11135	0.999379	1737	3	3.3433
Gpr137c	4	0.96853	0.95554	0.989319	18605	0	2.2924	0.031468	0.11135	0.999379	1738	4	2.2924
Ddx17	4	0.96852	0.95554	0.989319	18604	0	2.2854	0.031477	0.11135	0.999379	1739	4	2.2854
Ndrg4	4	0.96073	0.94592	0.987053	18460	0	3.2511	0.031574	0.11166	0.999379	1740	4	3.2511
Actrt1	4	0.83101	0.8062	0.963641	16034	0	1.3432	0.031576	0.11166	0.999379	1741	3	1.3432
Rec114	4	0.96841	0.95517	0.989319	18603	0	1.0667	0.031594	0.11166	0.999379	1742	4	1.0667
Vwa8	4	0.71229	0.70942	0.962274	13804	1	3.3103	0.031632	0.11166	0.999379	1743	3	3.3103
Ikzf2	4	0.70734	0.70528	0.962274	13742	1	-0.59537	0.031688	0.11233	0.999379	1744	1	-0.59537
Car2	4	0.046733	0.093865	0.803581	2116	2	2.2241	0.031713	0.11233	0.999379	1745	2	2.2241
Tsnax	4	0.038532	0.081928	0.803581	1794	3	-1.4191	0.031745	0.11233	0.999379	1746	1	-1.4191
Fgd6	4	0.17667	0.27862	0.939208	5539	2	2.149	0.031781	0.11233	0.999379	1747	2	2.149
Masp1	3	0.96816	0.95804	0.990638	18600	0	2.0817	0.031837	0.089358	0.999379	1748	3	2.0817
Apeh	4	0.26242	0.38352	0.945217	7297	1	3.7476	0.031841	0.11233	0.999379	1749	3	3.7476
Oard1	4	0.33924	0.46115	0.945217	8745	2	2.4869	0.031849	0.11233	0.999379	1750	2	2.4869
Dgkz	4	0.15697	0.25073	0.914062	5113	1	1.644	0.031857	0.11233	0.999379	1751	3	1.644
Araf	3	0.96812	0.95804	0.990638	18599	0	2.132	0.031885	0.089358	0.999379	1752	3	2.132
Spg20	4	0.3512	0.47408	0.945217	8946	1	4.0514	0.031905	0.11266	0.999379	1753	3	4.0514
Gpd1l	4	0.27461	0.40125	0.945217	7567	2	-0.24428	0.031913	0.11266	0.999379	1754	1	-0.24428
Nlrp10	3	0.194	0.29794	0.945217	5886	1	0.75771	0.031921	0.089358	0.999379	1755	2	0.75771
Uqcrh	3	0.90695	0.88342	0.97356	17468	0	5.5392	0.03193	0.089358	0.999379	1756	3	5.5392
Fcgr4	4	0.11742	0.20279	0.876997	4251	2	1.3005	0.03197	0.11266	0.999379	1757	2	1.3005
1110037F02Rik	4	0.96803	0.95394	0.988401	18597	0	1.5511	0.031971	0.11266	0.999379	1758	4	1.5511
Olfr796	4	0.96802	0.95394	0.988401	18596	0	2.2762	0.031975	0.11266	0.999379	1759	4	2.2762
2010107G12Rik	4	0.78204	0.7568	0.963472	15045	1	2.9868	0.032026	0.11266	0.999379	1760	3	2.9868
Htr2a	3	0.62157	0.61541	0.956086	12486	1	5.0563	0.03203	0.089691	0.999379	1761	2	5.0563
Crem	4	0.96796	0.95394	0.988401	18594	0	1.5472	0.032036	0.11266	0.999379	1762	4	1.5472
St6galnac6	4	0.96796	0.95394	0.988401	18593	0	3.1354	0.032041	0.11266	0.999379	1763	4	3.1354
Dcaf4	4	0.96794	0.95394	0.988401	18592	0	3.3636	0.03206	0.11266	0.999379	1764	4	3.3636
Uty	4	0.88776	0.87064	0.97356	17112	0	3.2353	0.032064	0.11266	0.999379	1765	3	3.2353
Snx22	3	0.95538	0.93892	0.985375	18371	0	5.0804	0.032079	0.090313	0.999379	1766	3	5.0804
Tdpoz5	4	0.72199	0.71493	0.962274	14012	1	2.5187	0.032082	0.11266	0.999379	1767	3	2.5187
Pf4	4	0.7638	0.74353	0.962274	14719	1	3.6214	0.032089	0.11266	0.999379	1768	3	3.6214
AU022751	4	0.96788	0.95394	0.988401	18591	0	2.7697	0.032119	0.11266	0.999379	1769	4	2.7697
Ankrd27	4	0.43352	0.53214	0.945217	10146	1	0.0023919	0.032138	0.11266	0.999379	1770	1	0.0023919
Ccdc71	3	0.96783	0.95691	0.990412	18590	0	1.694	0.032168	0.090313	0.999379	1771	3	1.694
Cox5b	4	0.031759	0.073362	0.803581	1520	3	-2.3345	0.032195	0.1132	0.999379	1772	1	-2.3345
Gabbr1	4	0.69604	0.69123	0.962274	13538	1	3.0406	0.032223	0.11355	0.999379	1773	2	3.0406
Olfr693	4	0.84969	0.82477	0.965087	16401	0	1.8687	0.032251	0.11387	0.999379	1774	3	1.8687
Lgals9	4	0.093523	0.16978	0.848976	3665	1	3.4238	0.032258	0.11387	0.999379	1775	3	3.4238
Trim71	4	0.96773	0.95309	0.987999	18589	0	2.6414	0.032268	0.11387	0.999379	1776	4	2.6414
Zfp36l3	4	0.96772	0.95309	0.987999	18588	0	1.6091	0.032281	0.11387	0.999379	1777	4	1.6091
Slc35d2	3	0.553	0.54961	0.945217	11575	1	5.4533	0.032295	0.090314	0.999379	1778	2	5.4533
Bcl11a	4	0.9677	0.95265	0.987706	18587	0	1.8981	0.032303	0.11423	0.999379	1779	4	1.8981
Tradd	4	0.61307	0.62779	0.956086	12348	1	4.1754	0.032307	0.11423	0.999379	1780	3	4.1754
Srd5a3	4	0.96765	0.95265	0.987706	18586	0	3.0099	0.032347	0.11423	0.999379	1781	4	3.0099
Smg7	4	0.96764	0.95265	0.987706	18585	0	2.0977	0.032361	0.11423	0.999379	1782	4	2.0977
Ankrd37	4	0.47761	0.54808	0.945217	10615	1	3.0822	0.032363	0.11423	0.999379	1783	2	3.0822
Ankrd23	4	0.90347	0.88404	0.97356	17399	0	3.3976	0.032424	0.11451	0.999379	1784	3	3.3976
Olfr772	4	0.47761	0.54808	0.945217	10659	1	3.961	0.032451	0.11451	0.999379	1785	3	3.961
Tbx10	3	0.86917	0.83905	0.967185	16728	0	1.2058	0.032513	0.091774	0.999379	1786	2	1.2058
Gadd45b	4	0.91556	0.89457	0.97356	17614	0	3.7664	0.032554	0.11451	0.999379	1787	3	3.7664
Dpep3	3	0.44898	0.4772	0.945217	10289	1	3.1761	0.032597	0.091775	0.999379	1788	2	3.1761
Mtm1	4	0.96739	0.95265	0.987706	18584	0	1.78	0.032607	0.11451	0.999379	1789	4	1.78
Jmy	3	0.96738	0.9557	0.989431	18583	0	2.1804	0.032616	0.091775	0.999379	1790	3	2.1804
Ap3d1	4	0.96737	0.95265	0.987706	18582	0	3.5525	0.032625	0.11451	0.999379	1791	4	3.5525
Dus3l	4	0.96735	0.95265	0.987706	18580	0	2.336	0.032652	0.11451	0.999379	1792	4	2.336
Ecscr	3	0.77635	0.74742	0.962274	14964	0	3.9909	0.032661	0.091775	0.999379	1793	2	3.9909
Hydin	4	0.91153	0.89139	0.97356	17572	0	3.0806	0.032684	0.11451	0.999379	1794	3	3.0806
Sv2c	4	0.96558	0.95177	0.987706	18551	0	2.5985	0.032701	0.11451	0.999379	1795	4	2.5985
3110002H16Rik	4	0.30216	0.4318	0.945217	8075	1	1.7645	0.032725	0.11451	0.999379	1796	2	1.7645
Mob2	4	0.8951	0.87983	0.97356	17259	0	2.4414	0.032733	0.11451	0.999379	1797	3	2.4414
Olfr1099	4	0.27404	0.39862	0.945217	7553	2	1.1581	0.032757	0.11451	0.999379	1798	2	1.1581
Pwwp2b	4	0.03534	0.077366	0.803581	1666	2	1.1208	0.032759	0.11451	0.999379	1799	2	1.1208
Hk2	4	0.64509	0.64945	0.961883	12830	1	3.0563	0.032795	0.11451	0.999379	1800	3	3.0563
Plp2	3	0.68607	0.65929	0.962274	13442	1	1.5961	0.032809	0.092144	0.999379	1801	2	1.5961
Atp6v0a4	4	0.67769	0.67727	0.962274	13279	1	1.4393	0.032813	0.11451	0.999379	1802	2	1.4393
Sycn	4	0.12021	0.20853	0.888323	4327	2	1.9823	0.03292	0.11476	0.999379	1803	2	1.9823
Fbrsl1	4	0.96705	0.95265	0.987706	18578	0	2.3456	0.032949	0.11476	0.999379	1804	4	2.3456
Gm12253	4	0.96703	0.95265	0.987706	18576	0	2.4719	0.032967	0.11476	0.999379	1805	4	2.4719
Vmn1r237	4	0.11617	0.20279	0.876997	4239	1	3.9667	0.033	0.11476	0.999379	1806	3	3.9667
Ager	3	0.96375	0.95164	0.987706	18513	0	3.1855	0.03302	0.092144	0.999379	1807	3	3.1855
Ntan1	4	0.17722	0.28366	0.945217	5583	2	0.61914	0.033038	0.11476	0.999379	1808	2	0.61914
Ctif	4	0.96696	0.95265	0.987706	18575	0	2.9458	0.033041	0.11476	0.999379	1809	4	2.9458
Tpi1	1	0.96696	0.96738	0.992256	18574	0	7.0194	0.033045	0.032623	0.999379	1810	1	7.0194
Letm1	2	0.071534	0.10953	0.820481	2951	1	1.6469	0.033105	0.060753	0.999379	1811	1	1.6469
Acbd7	4	0.63958	0.64521	0.959222	12767	1	2.8564	0.033115	0.11476	0.999379	1812	2	2.8564
S100a10	4	0.92178	0.89768	0.97356	17710	0	3.6781	0.033144	0.11503	0.999379	1813	3	3.6781
Bbs1	4	0.36334	0.48619	0.945217	9208	1	0.84218	0.03315	0.11503	0.999379	1814	2	0.84218
Ppef2	4	0.96088	0.94684	0.987282	18462	0	2.6704	0.033173	0.11538	0.999379	1815	4	2.6704
Slc6a18	4	0.96681	0.95221	0.987706	18572	0	2.3737	0.033186	0.11538	0.999379	1816	4	2.3737
Hhipl2	4	0.088062	0.16595	0.848976	3490	2	-0.44569	0.033207	0.11539	0.999379	1817	2	-0.44569
Krtap1-4	4	0.65318	0.65774	0.962274	12948	1	3.8145	0.033213	0.11539	0.999379	1818	3	3.8145
Lama5	4	0.81153	0.78977	0.963641	15646	0	4.3003	0.033265	0.11564	0.999379	1819	3	4.3003
Depdc1a	4	0.63183	0.63826	0.956086	12604	1	4.0494	0.033288	0.11564	0.999379	1820	3	4.0494
1700011A15Rik	4	0.92178	0.89768	0.97356	17759	0	4.8741	0.033301	0.11564	0.999379	1821	3	4.8741
4933428G20Rik	4	0.61983	0.63408	0.956086	12449	1	4.5901	0.033311	0.11564	0.999379	1822	3	4.5901
Krtap9-3	4	0.96669	0.95221	0.987706	18570	0	1.6404	0.033312	0.11564	0.999379	1823	4	1.6404
Akap17b	4	0.28062	0.40689	0.945217	7690	2	-0.09491	0.033319	0.11564	0.999379	1824	1	-0.09491
Calhm1	3	0.83247	0.8065	0.963641	16073	0	5.319	0.033333	0.092952	0.999379	1825	2	5.319
Ms4a4b	3	0.96666	0.95486	0.989146	18569	0	4.1992	0.03334	0.092952	0.999379	1826	3	4.1992
Slc16a4	2	0.96663	0.96407	0.992256	18568	0	4.5973	0.033369	0.061485	0.999379	1827	2	4.5973
Cdc42	4	0.74225	0.73165	0.962274	14324	1	4.3269	0.033381	0.11564	0.999379	1828	3	4.3269
Mctp2	4	0.9341	0.91411	0.978443	17974	0	3.9433	0.033414	0.11564	0.999379	1829	3	3.9433
Uhrf1bp1l	4	0.7638	0.74353	0.962274	14768	1	2.8739	0.033451	0.11564	0.999379	1830	3	2.8739
Slc7a6	3	0.96654	0.95486	0.989146	18567	0	2.7067	0.033457	0.092953	0.999379	1831	3	2.7067
Treml4	4	0.96653	0.95221	0.987706	18566	0	1.5072	0.033474	0.11564	0.999379	1832	4	1.5072
Klre1	3	0.87497	0.84506	0.967185	16864	0	4.6078	0.033501	0.093436	0.999379	1833	2	4.6078
Zfp37	4	0.96649	0.95221	0.987706	18565	0	2.2321	0.033515	0.11564	0.999379	1834	4	2.2321
Fbxw18	4	0.86917	0.84534	0.967185	16736	0	3.8846	0.033527	0.11564	0.999379	1835	3	3.8846
Smim1	4	0.082876	0.15532	0.848976	3329	1	2.5643	0.033544	0.11599	0.999379	1836	3	2.5643
Abca13	2	0.96643	0.96366	0.992256	18564	0	3.8357	0.033569	0.061853	0.999379	1837	2	3.8357
Lbx2	4	0.018997	0.04818	0.803581	995	2	0.86966	0.0336	0.11599	0.999379	1838	2	0.86966
Tmem158	4	0.96637	0.95177	0.987706	18563	0	2.6113	0.033632	0.11599	0.999379	1839	4	2.6113
Atoh7	4	0.96636	0.95177	0.987706	18562	0	2.4631	0.033643	0.11599	0.999379	1840	4	2.4631
Agk	3	0.072785	0.11819	0.826231	2985	1	3.0174	0.033654	0.093437	0.999379	1841	2	3.0174
Cdhr1	4	0.86347	0.8384	0.966857	16653	0	1.5175	0.033656	0.11599	0.999379	1842	2	1.5175
Chodl	3	0.85209	0.81898	0.963641	16462	0	4.4922	0.033696	0.093789	0.999379	1843	2	4.4922
Zfp105	4	0.96128	0.9473	0.987282	18470	0	4.3043	0.033763	0.116	0.999379	1844	4	4.3043
Lacc1	4	0.2636	0.38752	0.945217	7348	2	-0.73125	0.033768	0.116	0.999379	1845	2	-0.73125
Amn1	4	0.7638	0.74353	0.962274	14709	1	3.0452	0.033798	0.116	0.999379	1846	3	3.0452
Pcolce2	4	0.90762	0.8882	0.97356	17480	0	3.5037	0.033836	0.116	0.999379	1847	3	3.5037
Pinlyp	4	0.35939	0.48361	0.945217	9132	1	3.2056	0.033855	0.116	0.999379	1848	3	3.2056
Myh1	4	0.94199	0.92242	0.979363	18129	0	3.3035	0.033867	0.116	0.999379	1849	4	3.3035
Gpaa1	1	0.96612	0.96738	0.992256	18561	0	7.691	0.03388	0.032623	0.999379	1850	1	7.691
Vmn1r91	3	0.63826	0.62604	0.956086	12714	1	4.6831	0.033908	0.094906	0.999379	1851	2	4.6831
4930467E23Rik	1	0.96605	0.96738	0.992256	18560	0	7.7282	0.033952	0.032623	0.999379	1852	1	7.7282
Nsg1	4	0.78788	0.76523	0.963641	15199	1	2.6578	0.033993	0.11657	0.999379	1853	2	2.6578
D2Wsu81e	1	0.96598	0.96738	0.992256	18559	0	7.2081	0.034024	0.032623	0.999379	1854	1	7.2081
Vmn1r120	3	0.81795	0.7963	0.963641	15736	0	1.6959	0.034034	0.094907	0.999379	1855	2	1.6959
Cfap36	4	0.92178	0.89768	0.97356	17707	0	3.4275	0.034045	0.11657	0.999379	1856	3	3.4275
B4galt4	4	0.35335	0.47812	0.945217	9056	2	-1.5968	0.034049	0.11657	0.999379	1857	1	-1.5968
Olfr448	3	0.91669	0.8944	0.97356	17633	0	2.8106	0.034077	0.094907	0.999379	1858	3	2.8106
Cdk13	4	0.96592	0.95177	0.987706	18558	0	1.0855	0.034082	0.11657	0.999379	1859	4	1.0855
B230217C12Rik	4	0.35442	0.4798	0.945217	9090	1	3.3331	0.034088	0.11657	0.999379	1860	3	3.3331
Olfr1408	4	0.056922	0.11018	0.820481	2460	2	1.1289	0.034105	0.11657	0.999379	1861	2	1.1289
Lancl3	4	0.94031	0.91998	0.978771	18096	0	2.9805	0.034112	0.11657	0.999379	1862	4	2.9805
Nt5c1a	3	0.89439	0.86917	0.97356	17247	0	4.9832	0.034121	0.095257	0.999379	1863	3	4.9832
Corin	4	0.96584	0.95177	0.987706	18557	0	3.358	0.03416	0.11657	0.999379	1864	4	3.358
Mesp2	4	0.23338	0.35652	0.945217	6678	2	0.94915	0.034161	0.11657	0.999379	1865	2	0.94915
Rnh1	2	0.96582	0.96285	0.992256	18556	0	4.7173	0.034176	0.0626	0.999379	1866	2	4.7173
Dct	4	0.95776	0.94301	0.986321	18400	0	3.4235	0.034205	0.11657	0.999379	1867	4	3.4235
Tcp10a	4	0.31737	0.44542	0.945217	8334	1	3.1852	0.034263	0.11684	0.999379	1868	3	3.1852
Olfr1204	3	0.92351	0.89851	0.973641	17778	0	5.7943	0.034266	0.095257	0.999379	1869	3	5.7943
Serpinh1	4	0.85665	0.83199	0.965375	16557	0	3.3246	0.034274	0.11684	0.999379	1870	3	3.3246
Zfp618	4	0.74225	0.73165	0.962274	14357	1	3.5279	0.034275	0.11684	0.999379	1871	3	3.5279
A230046K03Rik	3	0.9431	0.92413	0.980074	18149	0	2.3324	0.034288	0.095258	0.999379	1872	3	2.3324
Rnf4	2	0.9657	0.96244	0.992129	18554	0	4.6811	0.034299	0.062972	0.999379	1873	2	4.6811
Bcl2l13	4	0.85987	0.83307	0.965518	16582	0	4.4115	0.034323	0.11684	0.999379	1874	3	4.4115
Smim11	4	0.30942	0.43999	0.945217	8199	1	0.21202	0.034386	0.11684	0.999379	1875	1	0.21202
Tspan8	3	0.58803	0.58151	0.956086	12034	1	5.4847	0.034394	0.095258	0.999379	1876	2	5.4847
Mfsd2a	3	0.68554	0.65929	0.962274	13439	1	4.6471	0.034411	0.095258	0.999379	1877	2	4.6471
Gja3	4	0.96558	0.95177	0.987706	18552	0	2.6372	0.034415	0.11684	0.999379	1878	4	2.6372
Arrdc5	4	0.0085882	0.020596	0.714107	519	1	3.1256	0.03446	0.11684	0.999379	1879	3	3.1256
Atp1b4	4	0.96553	0.95177	0.987706	18550	0	2.1118	0.034468	0.11684	0.999379	1880	4	2.1118
Ttc5	4	0.7638	0.74353	0.962274	14708	1	3.5237	0.034498	0.11684	0.999379	1881	3	3.5237
Pcbp2	4	0.96286	0.94871	0.987706	18498	0	2.2982	0.034511	0.11684	0.999379	1882	4	2.2982
Tmem140	4	0.96547	0.95177	0.987706	18549	0	1.862	0.034533	0.11684	0.999379	1883	4	1.862
Lrfn3	4	0.96545	0.95177	0.987706	18548	0	2.5671	0.034551	0.11684	0.999379	1884	4	2.5671
1700025G04Rik	4	0.20577	0.31918	0.945217	6116	2	1.5769	0.034568	0.11684	0.999379	1885	2	1.5769
Alg10b	4	0.96539	0.95177	0.987706	18546	0	2.2583	0.034607	0.11684	0.999379	1886	4	2.2583
Cdc42ep5	4	0.89094	0.87463	0.97356	17172	0	2.7403	0.034626	0.11684	0.999379	1887	3	2.7403
Sftpa1	4	0.96536	0.95177	0.987706	18545	0	1.5201	0.034644	0.11684	0.999379	1888	4	1.5201
Tra2b	4	0.96534	0.95177	0.987706	18544	0	1.7863	0.034657	0.11684	0.999379	1889	4	1.7863
Scrg1	4	0.12697	0.21675	0.899571	4467	1	1.7584	0.034667	0.11684	0.999379	1890	3	1.7584
Aak1	4	0.27323	0.39862	0.945217	7543	2	2.0477	0.034697	0.11684	0.999379	1891	2	2.0477
Kctd14	4	0.33864	0.46115	0.945217	8739	2	2.2399	0.034709	0.11684	0.999379	1892	2	2.2399
Ccnk	3	0.79361	0.76109	0.963641	15294	0	1.0458	0.03471	0.098275	0.999379	1893	2	1.0458
Mbl2	4	0.79832	0.78177	0.963641	15433	0	3.7094	0.03471	0.11684	0.999379	1894	3	3.7094
Endou	4	0.96529	0.95177	0.987706	18541	0	2.1393	0.034711	0.11684	0.999379	1895	4	2.1393
Tlr1	4	0.96529	0.95177	0.987706	18542	0	1.9297	0.034711	0.11684	0.999379	1896	4	1.9297
Ar	4	0.030957	0.072409	0.803581	1495	2	0.60665	0.034723	0.11684	0.999379	1897	2	0.60665
Acnat1	4	0.96527	0.95177	0.987706	18540	0	1.7939	0.034727	0.11684	0.999379	1898	4	1.7939
Ttll2	3	0.38553	0.42658	0.945217	9624	1	1.8108	0.034752	0.098275	0.999379	1899	2	1.8108
Tarsl2	4	0.86352	0.8384	0.966857	16654	0	3.3184	0.034767	0.11718	0.999379	1900	2	3.3184
Dock7	4	0.96522	0.95135	0.987706	18539	0	1.8436	0.034778	0.11718	0.999379	1901	4	1.8436
Tbr1	4	0.14655	0.23919	0.914062	4871	2	-1.0512	0.034835	0.11718	0.999379	1902	2	-1.0512
Lif	4	0.89207	0.87599	0.97356	17198	0	4.0748	0.034838	0.11718	0.999379	1903	3	4.0748
Hltf	4	0.96515	0.95135	0.987706	18538	0	3.2973	0.034852	0.11744	0.999379	1904	4	3.2973
Ptpn2	4	0.94402	0.92606	0.980458	18169	0	1.471	0.034929	0.11744	0.999379	1905	4	1.471
Gm9573	4	0.22327	0.33843	0.945217	6458	2	1.314	0.034947	0.11744	0.999379	1906	2	1.314
Kif19a	3	0.88301	0.85315	0.967491	17022	0	5.2094	0.03496	0.098275	0.999379	1907	3	5.2094
Tceal1	3	0.65323	0.63363	0.956086	12949	1	2.1826	0.034963	0.098275	0.999379	1908	2	2.1826
Aox4	4	0.94131	0.9212	0.9791	18120	0	3.4047	0.034975	0.11744	0.999379	1909	4	3.4047
Ctps2	3	0.96502	0.95285	0.987854	18536	0	2.6913	0.034983	0.098275	0.999379	1910	3	2.6913
Wfdc6a	4	0.87874	0.85398	0.967491	16938	0	2.7526	0.035026	0.11744	0.999379	1911	3	2.7526
Cd46	4	0.96495	0.95135	0.987706	18535	0	2.1339	0.035053	0.11744	0.999379	1912	4	2.1339
Fam71a	4	0.33639	0.46006	0.945217	8684	1	2.5031	0.035116	0.11801	0.999379	1913	2	2.5031
BC048546	4	0.65822	0.66123	0.962274	12978	1	3.4679	0.035121	0.11801	0.999379	1914	3	3.4679
Cuta	3	0.949	0.93178	0.982187	18256	0	5.388	0.035141	0.098632	0.999379	1915	3	5.388
Fcgr3	4	0.65329	0.65774	0.962274	12951	1	3.5237	0.035192	0.11828	0.999379	1916	3	3.5237
Vmn1r122	4	0.87787	0.85095	0.967425	16921	0	4.1171	0.035195	0.11828	0.999379	1917	3	4.1171
Irf1	4	0.063142	0.12185	0.826231	2673	3	-1.1383	0.035228	0.11828	0.999379	1918	1	-1.1383
Mgst2	4	0.70655	0.70528	0.962274	13735	1	2.7287	0.035275	0.11828	0.999379	1919	2	2.7287
Raly	4	0.18595	0.30006	0.945217	5740	1	0.97609	0.035284	0.11828	0.999379	1920	2	0.97609
Gpr82	4	0.96471	0.95135	0.987706	18530	0	1.7716	0.035289	0.11828	0.999379	1921	4	1.7716
Rgs12	4	0.96471	0.95135	0.987706	18532	0	2.0158	0.035289	0.11828	0.999379	1922	4	2.0158
Mrgprb4	4	0.96471	0.95135	0.987706	18533	0	3.7658	0.035289	0.11828	0.999379	1923	4	3.7658
Srd5a2	4	0.96471	0.95135	0.987706	18531	0	2.216	0.035289	0.11828	0.999379	1924	4	2.216
1700015E13Rik	4	0.54748	0.59442	0.956086	11525	1	3.9628	0.035298	0.11828	0.999379	1925	3	3.9628
Slc22a23	4	0.93122	0.91002	0.977947	17919	0	4.2329	0.03531	0.11828	0.999379	1926	3	4.2329
Esp38	4	0.052724	0.10448	0.811199	2339	1	3.1022	0.035381	0.11828	0.999379	1927	3	3.1022
Nup153	3	0.96461	0.95242	0.987706	18529	0	2.2401	0.035394	0.098633	0.999379	1928	3	2.2401
Erich4	4	0.96459	0.95135	0.987706	18528	0	2.2578	0.035409	0.12107	0.999379	1929	4	2.2578
Napb	4	0.11895	0.20578	0.88298	4290	2	2.189	0.03544	0.12134	0.999379	1930	2	2.189
Fam131a	4	0.96455	0.95135	0.987706	18527	0	2.2989	0.035446	0.12134	0.999379	1931	4	2.2989
Cth	3	0.068818	0.11206	0.820481	2867	2	-1.5741	0.03547	0.098633	0.999379	1932	1	-1.5741
Krtap13-1	4	0.50355	0.56557	0.954766	10932	1	3.1302	0.035523	0.12189	0.999379	1933	3	3.1302
B3gnt4	4	0.85025	0.82646	0.965375	16410	0	3.9495	0.035559	0.12189	0.999379	1934	3	3.9495
Mapre3	4	0.24535	0.36999	0.945217	6961	2	-0.20271	0.035564	0.12189	0.999379	1935	2	-0.20271
Unc93b1	4	0.96443	0.95135	0.987706	18526	0	2.2313	0.035569	0.12189	0.999379	1936	4	2.2313
Uck1	4	0.89396	0.87813	0.97356	17242	0	3.0245	0.035572	0.12189	0.999379	1937	3	3.0245
Mrps7	3	0.024622	0.055823	0.803581	1230	2	-1.9411	0.035596	0.098967	0.999379	1938	1	-1.9411
Spa17	3	0.96439	0.95203	0.987706	18525	0	3.6354	0.035606	0.098967	0.999379	1939	3	3.6354
1700056E22Rik	4	0.88186	0.85894	0.97078	17002	0	3.203	0.035642	0.12225	0.999379	1940	3	3.203
Txnl1	4	0.06478	0.12283	0.826231	2734	2	0.84507	0.035654	0.12225	0.999379	1941	2	0.84507
Alpi	4	0.17252	0.27261	0.934476	5464	2	-0.08689	0.035677	0.12225	0.999379	1942	2	-0.08689
Gnb2	4	0.9643	0.95091	0.987706	18524	0	3.1757	0.035697	0.12225	0.999379	1943	4	3.1757
Tns1	4	0.18144	0.29705	0.945217	5643	1	4.001	0.035714	0.12225	0.999379	1944	3	4.001
S100a2	4	0.17667	0.27862	0.939208	5570	2	1.7084	0.035725	0.12225	0.999379	1945	2	1.7084
Apol7e	4	0.96425	0.95091	0.987706	18523	0	3.238	0.035753	0.12225	0.999379	1946	4	3.238
Rtp4	4	0.02687	0.068034	0.803581	1321	1	3.0422	0.035755	0.12225	0.999379	1947	3	3.0422
Vmn2r88	4	0.94679	0.92842	0.981192	18217	0	3.9646	0.035797	0.12225	0.999379	1948	4	3.9646
Atg101	3	0.63039	0.61997	0.956086	12580	1	0.60087	0.035807	0.099404	0.999379	1949	1	0.60087
Apobr	4	0.32699	0.4558	0.945217	8533	1	3.0799	0.035809	0.12225	0.999379	1950	2	3.0799
Has3	4	0.91153	0.89139	0.97356	17528	0	3.757	0.035821	0.12225	0.999379	1951	3	3.757
Npas3	4	0.96418	0.95091	0.987706	18522	0	2.3526	0.035825	0.12225	0.999379	1952	4	2.3526
Adamtsl4	4	0.045537	0.092478	0.803581	2075	1	2.4216	0.035833	0.12225	0.999379	1953	2	2.4216
Ctnnd2	4	0.96412	0.95091	0.987706	18521	0	1.8972	0.035877	0.12225	0.999379	1954	4	1.8972
Cacnb4	4	0.96411	0.95091	0.987706	18520	0	1.3972	0.035886	0.12225	0.999379	1955	4	1.3972
Zic1	4	0.96411	0.95091	0.987706	18519	0	3.0846	0.035891	0.12225	0.999379	1956	4	3.0846
Xpnpep1	4	0.61837	0.63131	0.956086	12434	1	0.89065	0.035901	0.1226	0.999379	1957	2	0.89065
Slc44a5	4	0.8771	0.85095	0.967425	16903	0	3.2221	0.035906	0.1226	0.999379	1958	3	3.2221
Rasa4	4	0.82262	0.79746	0.963641	15889	0	3.6542	0.035912	0.1226	0.999379	1959	3	3.6542
Tex15	4	0.8875	0.86928	0.97356	17106	0	3.0622	0.035952	0.1226	0.999379	1960	3	3.0622
Bub1	3	0.96405	0.95203	0.987706	18518	0	2.4345	0.035954	0.09986	0.999379	1961	3	2.4345
Gm11596	3	0.66119	0.63888	0.956086	13052	1	-0.11844	0.035976	0.09986	0.999379	1962	1	-0.11844
Svs2	4	0.061712	0.11852	0.826231	2638	2	1.2823	0.035988	0.1226	0.999379	1963	2	1.2823
Etfb	4	0.63183	0.63826	0.956086	12655	1	2.1643	0.036023	0.1226	0.999379	1964	2	2.1643
Acad11	4	0.83395	0.80867	0.963641	16103	0	3.833	0.036024	0.1226	0.999379	1965	3	3.833
Edf1	4	0.12475	0.21521	0.899453	4398	1	2.5714	0.036051	0.1226	0.999379	1966	3	2.5714
Olfml2a	4	0.11856	0.20502	0.882505	4283	2	2.332	0.036083	0.1226	0.999379	1967	2	2.332
Gm1527	3	0.040987	0.075374	0.803581	1896	1	4.2998	0.036114	0.10019	0.999379	1968	2	4.2998
Olfr641	4	0.41282	0.52228	0.945217	9925	1	4.012	0.03613	0.1226	0.999379	1969	3	4.012
Sema3e	3	0.96387	0.95164	0.987706	18515	0	2.7043	0.036133	0.10019	0.999379	1970	3	2.7043
Cd209g	4	0.06938	0.13305	0.838017	2879	1	2.419	0.036181	0.1226	0.999379	1971	3	2.419
Abhd6	3	0.24523	0.35576	0.945217	6951	1	0.18107	0.036229	0.10019	0.999379	1972	1	0.18107
Slx1b	4	0.88302	0.85989	0.97078	17023	0	2.3344	0.036237	0.12288	0.999379	1973	2	2.3344
Astn1	4	0.93513	0.91411	0.978443	17989	0	3.6809	0.03631	0.12608	0.999379	1974	3	3.6809
Ndst1	3	0.75578	0.72647	0.962274	14590	0	4.4607	0.036324	0.10019	0.999379	1975	2	4.4607
Theg	4	0.49265	0.55571	0.949108	10822	1	2.0484	0.036349	0.12637	0.999379	1976	3	2.0484
Hnrnpr	4	0.96365	0.95004	0.987706	18510	0	2.085	0.036349	0.12637	0.999379	1977	4	2.085
Coro7	4	0.96363	0.95004	0.987706	18509	0	1.4473	0.036366	0.12637	0.999379	1978	4	1.4473
Hspb6	4	0.9636	0.95004	0.987706	18508	0	4.1975	0.036397	0.12637	0.999379	1979	4	4.1975
Abhd2	4	0.2636	0.38752	0.945217	7332	2	-0.53617	0.036405	0.12637	0.999379	1980	1	-0.53617
Rhbg	4	0.2409	0.36512	0.945217	6860	1	2.8244	0.03643	0.12637	0.999379	1981	2	2.8244
Cav1	3	0.7723	0.74096	0.962274	14890	0	0.97437	0.036482	0.10019	0.999379	1982	2	0.97437
Phka2	4	0.9635	0.95003	0.987706	18506	0	2.225	0.036503	0.12637	0.999379	1983	4	2.225
Phf11a	4	0.90674	0.88735	0.97356	17461	0	3.3509	0.036506	0.12637	0.999379	1984	3	3.3509
Irf8	4	0.96349	0.95003	0.987706	18505	0	3.2831	0.036513	0.12637	0.999379	1985	4	3.2831
Prrx2	4	0.21355	0.32917	0.945217	6250	1	3.5377	0.036517	0.12637	0.999379	1986	3	3.5377
Ap3s1	4	0.96342	0.95003	0.987706	18504	0	2.7081	0.03658	0.12637	0.999379	1987	4	2.7081
Erich2	3	0.96341	0.95164	0.987706	18503	0	1.7951	0.036593	0.10019	0.999379	1988	3	1.7951
Hsfy2	4	0.45591	0.53903	0.945217	10393	1	0.90131	0.03663	0.12672	0.999379	1989	2	0.90131
Ptprn2	4	0.96336	0.94961	0.987706	18502	0	2.7092	0.036643	0.12697	0.999379	1990	4	2.7092
Gpr179	4	0.65822	0.66123	0.962274	13009	1	0.79688	0.036686	0.12697	0.999379	1991	2	0.79688
Suco	3	0.16487	0.26028	0.924199	5292	1	4.1819	0.036702	0.10019	0.999379	1992	2	4.1819
Hs6st1	4	0.41282	0.52228	0.945217	9915	1	3.6186	0.036739	0.12733	0.999379	1993	3	3.6186
Arpc1b	4	0.20691	0.32425	0.945217	6147	1	2.6539	0.036743	0.12733	0.999379	1994	2	2.6539
Irgq	3	0.16801	0.26501	0.928713	5367	2	-0.82142	0.036777	0.10054	0.999379	1995	1	-0.82142
Cryaa	4	0.72845	0.72327	0.962274	14111	1	3.0449	0.036876	0.12788	0.999379	1996	3	3.0449
Trappc13	3	0.10409	0.16049	0.848976	3978	1	5.2994	0.036887	0.10054	0.999379	1997	2	5.2994
Ltv1	3	0.96311	0.95123	0.987706	18501	0	3.048	0.036889	0.10054	0.999379	1998	3	3.048
Fam110c	3	0.60716	0.6018	0.956086	12294	1	-0.38516	0.03703	0.1009	0.999379	1999	1	-0.38516
[truncated: 17,245 more rows]
