# Supplementary material for: Reciprocal, methylation-dependent binding of Zfp57 and Gzf1 safeguards Dlk1-Dio3 imprinting during developmental reprogramming
Source: Research Square preprint supplement (doi:10.21203/rs.3.rs-7243168/v1), 2025-09-22
Supplement: Supplementary file 2 [file 2a4bf91603849fdb3d960a77.xlsx]

## Sheet: hit validations
Sequence Name	Sequence	Item Length	GC% Content	Tm (50mM NaCl) C	Modifications and Services
Zfp57_Brie_g3_w	CACCGCGTGGCAGTGTCTTTCACCC	25	64	66
Zfp57_Brie_g3_c	AAACGGGTGAAAGACACTGCCACGC	25	56	63.9
Uhrf1_Brie_g1_w	CACCGCAGTGCCGTTAAGACCTCGG	25	64	65.4
Uhrf1_Brie_g1_c	AAACCCGAGGTCTTAACGGCACTGC	25	56	63.2
Zfp57_gRNA1_w	CACCGTGAGAGCTTATATCTCTTCC	25	48	56.5
Zfp57_gRNA1_c	AAACGGAAGAGATATAAGCTCTCAC	25	40	54.3
Zfp57_gRNA2_w	CACCGAAGCTAGGCTTGAAAATAAG	25	44	56.1
Zfp57_gRNA2_c	AAACCTTATTTTCAAGCCTAGCTTC	25	36	53.8
gSfmbt1_w	CACCGTGCAGTGGAGTCTAAAGAA	24	50	58.8
gSfmbt1_c	AAACTTCTTTAGACTCCACTGCAC	24	41.7	55.1
Gzf1gRNAExon3_1w	CACCGCACAGAAACTTCATGTGTGT	25	48	59.9
Gzf1gRNAExon3_1c	AAACACACACATGAAGTTTCTGTGC	25	40	56.6
Gzf1gRNAExon3_2w	CACCGACAGTCAATCACAAGAGTGT	25	48	58.9
Gzf1gRNAExon3_2c	AAACACACTCTTGTGATTGACTGTC	25	40	55.6
Ttll8_w	CACCGTGAAGACATAGACGTATCGG	25	52	58.7
Ttll8_c	AAACCCGATACGTCTATGTCTTCAC	25	44	56.4
foxn4_w	CACCGAAGCTGTAGATCTCACTCA	24	50	58
foxn4_c	AAACTGAGTGAGATCTACAGCTTC	24	41.7	54.3
Olfr1447_w	CACCGTGACTAAAAGTATGTATACA	25	36	52.4
Olfr1447_c	AAACTGTATACATACTTTTAGTCAC	25	28	48.9
Gzf1_40919_w	CACCGAAACTCTTCTCGTACAGGA	24	50	58.1
Gzf1_40919_c	AAACTCCTGTACGAGAAGAGTTTC	24	41.7	54.4
Gm5615_w	CACCGACCCTTTATCTGCTTTGCGG	25	56	62
Gm5615_c	AAACCCGCAAAGCAGATAAAGGGTC	25	48	59.8
Edc4_w	CACCGTCAGTGTCAGCACTTCGGAG	25	60	63.1
Edc4_c	AAACCTCCGAAGTGCTGACACTGAC	25	52	60.9
Mycbpap_47862_c	CACCGTGTGGTCAATAACGGCACGG	25	60	70.5
Mycbpap_47862_w	AAACCCGTGCCGTTATTGACCACAC	25	52	69
Vmn1r88_w	CACCGAGTAACCATGTGAAAATCCA	25	44	65.1
Vmn1r88_c	AAACTGGATTTTCACATGGTTACTC	25	36	62.1
St8sia4_w	CACCGTGCGGAACGTGACGTATCTG	25	60	69.8
St8sia4_c	AAACCAGATACGTCACGTTCCGCAC	25	52	68.4
Cep131_w	CACCGCCTTAACACGTCGAACAGTG	25	56	68.6
Cep131_c	AAACCACTGTTCGACGTGTTAAGGC	25	48	67.1
Ric8_w	CACCGTGTGGGACTGTACCGCAAG	24	62.5	70
Ric8_c	AAACCTTGCGGTACAGTCCCACAC	24	54.2	68.4
Gzf1_w	CACCGCTCCAAAGCAAGTGTACCA	24	54.2	68.6
Gzf1_c	AAACTGGTACACTTGCTTTGGAGC	24	45.8	65.6
Qrich1_w	CACCGCAAACACTCACTCCCAATGG	25	56	69
Qrich1_c	AAACCCATTGGGAGTGAGTGTTTGC	25	48	67.5
Focad_w	CACCGAACGTGACAGCTCTTAGTCG	25	56	67.8
Focad_c	AAACCGACTAAGAGCTGTCACGTTC	25	48	66.3
Cdc42bpb_w	CACCGAGCGTTCGCATCTCACCTCG	25	64	71.3
Cdc42bpb_c	AAACCGAGGTGAGATGCGAACGCTC	25	56	69.9
CD207_w	CACCGCCTTGAACACAAAGGTCCA	24	54.2	68.9
CD207_c	AAACTGGACCTTTGTGTTCAAGGC	24	45.8	65.8
Tcf23gRNA-4_w	CACCGCGGAGAACGCAGCACGGGAA	25	68	74.9
Tcf23gRNA-4_c	AAACTTCCCGTGCTGCGTTCTCCGC	25	60	72.2
Zbtb12gRNA-2_w	CACCGTGTTACCCCACCGCAAGGGG	25	68	73.4
Zbtb12gRNA-2_c	AAACCCCCTTGCGGTGGGGTAACAC	25	60	71.9
human U6 seq	GATACAAGGCTGTTAGAGAGATAATT	26	34.6	60.8

## Sheet: Bisulfite
Sequence Name	Sequence	Item Length	GC% Content	Tm (50mM NaCl) C	Modifications and Services
IG-CGI Nested_F	GGTATATTATGTTAGTGTTAGGAAGGATTGTG	32	34.4	55.3
IG-CGI Nested_R	CATCCCCTATACTCAAAACATTCTCC	26	42.3	55.1
IG-CGI Internal_F	AAGTGTTGTGGTTTGTTATGGGTAAG	26	38.5	55.8
IG-CGI Internal_R	ATAATACAACCCTTCCCTCACTCC	24	45.8	56
CGI_reporter_BS_Nested_F	TTGTTATGGGTAAGTTTTATGGTTTATT	28	25	51.9
CGI_reporter_BS_Nested_R	ATATCCTACCAAAAAACAACTACCAAAA	28	28.6	53.6
CGI_reporter_BS_Internal_F	TATGGGTAAGTTTTATGGTTTATTGTAT	28	25	51.2
CGI_reporter_BS_Internal_R	CAACTACCAAAAAAAATACTTAAACATT	28	21.4	50.1
TRE_BS_Nested_F	GAGGTTTTAGGTTTTAGAAATTTTTTTT	28	21.4	50.3
TRE_BS_Nested_R	ATAAACAACAAACCTAAAATTCTCTAAA	28	21.4	50.4
TRE_BS_internal_F	GTTTTGTGGTTAATTAAGTTGTTTTTAA	28	21.4	50.4
TRE_BS_internal_R	CCAAAAAACTAAAAAACTTAATAAACCT	28	21.4	50.1
Gtl2-DMR Nested, Forward	GGGTATTTTATGTGGGGGTGATAG	24	45.8	55.1
Gtl2-DMR Nested, Reverse	TCAAACAAAAAATAACTAACCACTCACC	28	32.1	54.5
Gtl2_New_BS_Int_F	TAATTAGGGTTTATGTAGGGAAAAATTA	28	25	51
Gtl2_New_BS_Int_R	ATAACTAACCACTCACCAAATAAAAAAT	28	25	52

## Sheet: Genotype
Sequence Name	Sequence	Item Length	GC% Content	Tm (50mM NaCl) C	Modifications and Services
Gzf1E3KOGenoF	GGAGCTCTCAAGTGGGAAGT	20	55	56.6
Gzf1E3KOGenoR	GCCTGACTCGATGGAAAAGC	20	55	56.3
Gzf1E3_Geno_Internal_F	AAAGGCGTGTGTCACCATTG	20	50	56.2
Gzf1E3_Geno_Internal_R	GCACCACATTCATCACAGACA	21	47.6	55.5
Gzf1_Geno_Int_F	AGTAAACCCTTGCCCCTGAG	20	55	57
Gzf1_Geno_Int_R	CCTCCAAGGGTGCTGAGATA	20	55	56.2
ZFP57KO_Geno_F	TTCTAGGTTTGAGCCCCAGG	20	55	56.7
ZFP57KO_Geno_R	TCCTCTCTGAACCCATGCAG	20	55	56.6
ZFP57_Geno_snp_F	TTCTGGTCGAGGCTGGAAC	19	57.9	57.1

## Sheet: qPCR
Sequence Name	Sequence	Item Length	GC% Content	Tm (50mM NaCl) C	Modifications and Services
Zfp57_RT_F	AAGTCAAACGCCTAGGACCA	20	50	56.2
Zfp57_RT_R	TGCCACGTCCTCATAACTGA	20	50	55.9
Dlk1 qPCR F (exon 5)	CGCAAGAAGAAGAACCTCCTGT	22	50	57.1
Dlk1 qPCR R (exon 5)	ACGCTGCTTAGATCTCCTCATCA	23	47.8	57.6
Gtl2 qPCR F (exon 10)	AGCCACCTATTTACAAATGGACTC	24	41.7	54.9
Gtl2 qPCR R (exon 10)	CATCCCCATGAGAAACCTGTT	21	47.6	55
Mirg_ex16 qPCR F	CTCAGGAGCGGATGTTCAAG	20	55	55.5
Mirg_ex16 qPCR R	GATGTCCCCAGTGGAATGTC	20	55	55.4
Rian_ex4 qPCR F	GAGACCTTGGCAGTGACCG	19	63.2	58.2
Rian_ex4 qPCR R	CCTGGCCCAAAAAGCCTC	18	61.1	56.9
Gzf1E45_RT_F	CTCAGCGCAATTCCCTGTAC	20	55	56.1
Gzf1E45_RT_R	GTGAACTGCTTCCCACACTG	20	55	56.2
MestF_qPCR	CATCGTCCTCTCCTTCTCC	19	57.9	54.2
MestR_qPCR	GTCCCACAGCTCACTCTC	18	61.1	54.9
b-ActinDNA_F	GAACAGCCTTCTTAGCACCG	20	55	56
b-ActinDNA_R	GCTGTATTCCCCTCCATCGT	20	55	56.7
nearby_F	CGCACAGCTTCCAGATACAC	20	55	56
nearby_R	TAGAAATGCCCACCTAGCGT	20	50	56.1
ChIP-RT-IGpeak_F	ATAAGCCAAGTGTGTTGCGG	20	50	56
ChIP-RT-IGpeak_R	TACTACGTAGACAGGCCGC	19	57.9	56.2

## Sheet: PBM
Sequence Name	Sequence	Item Length	GC% Content	Tm (50mM NaCl) C	Modifications and Services
IVT_For_PureKit	GCGAATTAATACGACTCACTATAGGGCTTAAGTATAAGGAGGAAAAAATATGGAAAGTGGCACAGTTTTGCTGGAA	76	38.2	68.2
IVT_rev_PureKit	AAACCCCTCCGTTTAGAGAGGGGTTATGCTAGTTATCACTTGTCATCGTCATCCTTGTA	59	44.1	68.3
Cast_1_fw	/5AmMC6/GGTATAGGCCAAGTGATATGTGGCACAGCTATGTGGTATACTACGGTATAAGCCAAGCGA	60	46.7	68.8	5' Amino Modifier C6
Cast_1_rv	TCGCTTGGCTTATACCGTAGTATACCACATAGCTGTGCCACATATCACTTGGCCTATACC	60	46.7	68.8
Cast_2_fw	/5AmMC6/ATAAGCCAAGCGATACGTGGTACAGCTACGTGGTATACTACGGTATAAGCCAAGTGTGTT	60	45	68.8	5' Amino Modifier C6
Cast_2_rv	AACACACTTGGCTTATACCGTAGTATACCACGTAGCTGTACCACGTATCGCTTGGCTTAT	60	45	68.8
Cast_3_fw	/5AmMC6/AAGCCAAGTGTGTTGCGGCACTGCTACGCGGTATACTACGGTACGAGCCAAGCGCCTTGC	60	58.3	73.9	5' Amino Modifier C6
Cast_3_rv	GCAAGGCGCTTGGCTCGTACCGTAGTATACCGCGTAGCAGTGCCGCAACACACTTGGCTT	60	58.3	73.9
Cast_4_fw	/5AmMC6/GCCAAGCGCCTTGCGGCCTGTCTACGTAGTATACTACGGTACGAGCCAAGTGCCTCACAG	60	58.3	72.6	5' Amino Modifier C6
Cast_4_rv	CTGTGAGGCACTTGGCTCGTACCGTAGTATACTACGTAGACAGGCCGCAAGGCGCTTGGC	60	58.3	72.6
129_1_fw	/5AmMC6/GGTATAGGCCAAGTAATACGTGGCACAGCTATGTGGTATACTACGGTATAAGCCAAGCGA	60	46.7	68.7	5' Amino Modifier C6
129_1_rv	TCGCTTGGCTTATACCGTAGTATACCACATAGCTGTGCCACGTATTACTTGGCCTATACC	60	46.7	68.7
129_2_fw	/5AmMC6/ATAAGCCAAGCGATACGTGGTACAGCTACGTGGTATACTACGGTATAAGCCAAGTGTGTT	60	45	68.8	5' Amino Modifier C6
129_2_rv	AACACACTTGGCTTATACCGTAGTATACCACGTAGCTGTACCACGTATCGCTTGGCTTAT	60	45	68.8
129_3_fw	/5AmMC6/AAGCCAAGTGTGTTGCGGCACTGCTACGTGGTATACTACGGTATGAGCCAAGCGCCTCGC	60	56.7	73.2	5' Amino Modifier C6
129_3_rv	GCGAGGCGCTTGGCTCATACCGTAGTATACCACGTAGCAGTGCCGCAACACACTTGGCTT	60	56.7	73.2
129_4_fw	/5AmMC6/GCCAAGCGCCTCGCGGCCTGTCTACGTAGTATACTACGGTACGAGCCAAGTGCCTCACAG	60	60	73	5' Amino Modifier C6
129_4_rv	CTGTGAGGCACTTGGCTCGTACCGTAGTATACTACGTAGACAGGCCGCGAGGCGCTTGGC	60	60	73
Gzf1_bs_unmethylated	GAGGCCATTACGGTAATGCCTCCTGGCATTACCGTAATGGCCTCACACTC
Gzf1_bs_methylated	GAGGCCATTA/5mC/GGTAATGCCTCCTGGCATTAC/5mC/GTAATGGCCTCACACTC
Scrambled_negative_ctrl	GAGGCCTATATGATGACGCCTCCTGGCGTCATCATATAGGCCTCACACTC

## Sheet: in vivo
Sequence Name	Sequence	Item Length	GC% Content	Tm (50mM NaCl) C	Modifications and Services
Gzf1gRNAExon3_1w	/AltR1/rCrArCrArGrArArArCrUrUrCrArUrGrUrGrUrGrUrGrUrUrUrUrArGrArGrCrUrArUrGrCrU/AltR2/	36	38.9	54.6	AltR1; AltR2
Gzf1gRNAExon3_2w	/AltR1/rArCrArGrUrCrArArUrCrArCrArArGrArGrUrGrUrGrUrUrUrUrArGrArGrCrUrArUrGrCrU/AltR2/	36	38.9	57.1	AltR1; AltR2
Y chr F	AGCCCTACAGCCACATGATA	20	50	55.7
Y chr R	GTCTTGCCTGTATGTGATGG	20	50	53.3

## Sheet: Screen
Order Date	Sequence Name	Sequence	Item Length	GC% Content	Tm (50mM NaCl) C	Modifications and Services
	ScreenNestedRev
	ScreenNestedFwd
	P7 F04
	P7 F05
	P7 F03
	P5 2 nt stagger
	P5 1nt stagger
	P5 6 NT STAGGER
	P5 3 nt stagger
	P5 8nt stagger
	P5 7nt stagger
	P5 4 nt stagger
	P5 0nt stagger
	P7 F02
	hexes CasBlastNeoColonyR
	CasBlastNeoColonyF
	F_Primer3 R26Cas9
	R_Primer3 R26Cas9
	R26mTmG-Neo-F
	R26mTmG-Neo-R
