# Supplementary material for: Reciprocal, methylation-dependent binding of Zfp57 and Gzf1 safeguards Dlk1-Dio3 imprinting during developmental reprogramming
Source: Research Square preprint supplement (doi:10.21203/rs.3.rs-7243168/v1), 2025-09-22
Supplement: Supplementary file 3 [file 343686974fc94eb3d1291903.xlsx]

## Sheet: PP1n2VsUS1n2.gene_summary
id	num	neg|score	neg|p-value	neg|fdr	neg|rank	neg|goodsgrna	neg|lfc	pos|score	pos|p-value	pos|fdr	pos|rank	pos|goodsgrna	pos|lfc
Uhrf1	4	1	1	1	19393	0	13.149	1.6792e-15	2.5526e-07	0.00165	1	4	13.149
Dnmt1	4	1	1	1	19392	0	13.774	3.7399e-14	2.5526e-07	0.00165	2	4	13.774
Zfp57	3	1	1	1	19391	0	11.542	3.9938e-07	2.5526e-07	0.00165	3	3	11.542
Hadh	4	0.52556	0.61447	0.992919	11109	1	9.1401	2.4826e-05	8.8575e-05	0.429455	4	3	9.1401
Tcf23	4	0.77066	0.77892	0.992919	15042	0	6.0867	6.0268e-05	0.00021825	0.822158	5	2	6.0867
Gm5615	3	0.90608	0.90342	0.992919	17595	0	11.131	9.3436e-05	0.00029431	0.822158	6	3	11.131
Ric8	4	0.9999	0.99974	0.999948	19390	0	4.1595	0.00010076	0.00042399	0.822158	7	4	4.1595
Edc4	4	0.9999	0.99973	0.999948	19389	0	6.2321	0.00010274	0.00043215	0.822158	8	4	6.2321
Nxpe4	4	0.42964	0.56106	0.992919	9986	1	5.8187	0.00011209	0.0004633	0.822158	9	2	5.8187
Zfp462	4	0.99987	0.99967	0.999948	19388	0	5.7133	0.00013211	0.00054089	0.822158	10	4	5.7133
2002-03-01	7	0.32379	0.58774	0.992919	8535	3	0.14854	0.00014658	0.0014557	0.822158	11	3	0.14854
9530077C05Rik	4	0.96876	0.9618	0.992919	18756	0	8.0528	0.00015986	0.00065882	0.822158	12	4	8.0528
Rpain	3	0.94265	0.92954	0.992919	18289	0	10.309	0.0002231	0.00053528	0.822158	13	3	10.309
Vmn2r82	4	0.99977	0.9995	0.999861	19387	0	6.8933	0.00023476	0.0010116	0.822158	14	4	6.8933
Tsc2	4	0.99976	0.99948	0.999861	19386	0	6.0338	0.00023689	0.0010274	0.822158	15	4	6.0338
Cd207	4	0.99861	0.99708	0.999757	19340	0	8.4739	0.00025127	0.0011045	0.822158	16	4	8.4739
Baz2a	4	0.99974	0.99947	0.999861	19385	0	5.2515	0.0002552	0.001105	0.822158	17	4	5.2515
Dnmt3l	4	0.99974	0.99946	0.999861	19384	0	4.5062	0.00025986	0.0011168	0.822158	18	4	4.5062
Gpr12	4	0.95224	0.95159	0.992919	18482	0	8.2013	0.00028901	0.0012224	0.822158	19	4	8.2013
1700029J07Rik	4	0.57092	0.64791	0.992919	11749	1	3.0213	0.0003071	0.0012572	0.822158	20	3	3.0213
A830080D01Rik	4	0.99969	0.99936	0.999861	19383	0	5.7345	0.00031142	0.0012572	0.822158	21	4	5.7345
Zbtb12	4	0.91581	0.92632	0.992919	17795	0	6.8064	0.00035969	0.0014552	0.822158	22	3	6.8064
Mycbpap	4	0.08837	0.21635	0.992919	3493	3	-0.66698	0.00036293	0.0014557	0.822158	23	1	-0.66698
Ddah2	4	0.061811	0.15971	0.992919	2582	2	-2.0488	0.00041875	0.0016176	0.822158	24	1	-2.0488
Zfp961	4	0.99957	0.99921	0.999831	19382	0	4.2103	0.00042712	0.0016344	0.822158	25	4	4.2103
Btbd17	3	0.99402	0.99087	0.997923	19227	0	10.104	0.00044351	0.0012888	0.822158	26	3	10.104
Gm8909	4	0.81423	0.82542	0.992919	15877	0	7.3257	0.00045654	0.0017074	0.822158	27	3	7.3257
Dytn	4	0.72929	0.75282	0.992919	14251	1	6.7584	0.00045798	0.0017074	0.822158	28	3	6.7584
Apol10a	4	0.90147	0.90707	0.992919	17508	0	7.9482	0.00046629	0.0017278	0.822158	29	3	7.9482
Krtap9-5	4	0.99953	0.99915	0.999825	19381	0	6.8361	0.00047138	0.0017278	0.822158	30	4	6.8361
Ift57	4	0.0633	0.16073	0.992919	2636	2	-1.2043	0.00047458	0.0017539	0.822158	31	2	-1.2043
Adgrf1	4	0.99933	0.99875	0.999757	19376	0	7.4432	0.00049369	0.0018591	0.822158	32	4	7.4432
Gm5741	4	0.99946	0.99904	0.999757	19380	0	6.4098	0.00054401	0.0022256	0.822158	33	4	6.4098
Hcn3	4	0.99212	0.98612	0.996888	19179	0	8.5794	0.00054883	0.0023308	0.822158	34	4	8.5794
Ptprz1	4	0.99945	0.99896	0.999757	19379	0	6.0847	0.00055443	0.0023767	0.822158	35	4	6.0847
Cdh1	3	0.94515	0.93166	0.992919	18335	0	9.8944	0.00055586	0.0015037	0.822158	36	3	9.8944
Olfr959	4	0.81315	0.82432	0.992919	15850	0	3.0349	0.00058622	0.0024906	0.822158	37	2	3.0349
Tmem138	4	0.42275	0.55836	0.992919	9895	1	4.0961	0.00058744	0.0024906	0.822158	38	3	4.0961
C77370	4	0.99938	0.99883	0.999757	19378	0	6.4369	0.00062143	0.0026677	0.822158	39	4	6.4369
Vmn1r88	4	0.99331	0.98724	0.996888	19206	0	8.01	0.00062397	0.0026677	0.822158	40	4	8.01
Prl2b1	4	0.23439	0.41624	0.992919	6784	1	4.1979	0.00064203	0.0027964	0.822158	41	3	4.1979
Wnt6	3	0.76959	0.77569	0.992919	15014	0	10.146	0.00064561	0.0016865	0.822158	42	2	10.146
Aff3	4	0.99935	0.99875	0.999757	19377	0	6.7618	0.00064732	0.0027964	0.822158	43	4	6.7618
Btbd11	4	0.52292	0.61315	0.992919	11084	1	7.5555	0.00067728	0.002898	0.822158	44	3	7.5555
Vmn1r199	4	0.99932	0.99875	0.999757	19375	0	5.7845	0.00068011	0.002898	0.822158	45	4	5.7845
Ptpn2	4	0.99929	0.99873	0.999757	19374	0	3.5664	0.00071388	0.0029659	0.822158	46	4	3.5664
Me2	4	0.11099	0.24526	0.992919	4025	1	7.5166	0.00072284	0.0029995	0.822158	47	3	7.5166
Mettl3	4	0.99926	0.99866	0.999757	19373	0	5.3708	0.00073783	0.0030843	0.822158	48	4	5.3708
Aass	4	0.014529	0.068192	0.992919	777	3	-1.4963	0.00075366	0.00312	0.822158	49	1	-1.4963
Serf2	4	0.99924	0.99862	0.999757	19372	0	5.9747	0.00076264	0.00312	0.822158	50	4	5.9747
Apol8	4	0.91775	0.92807	0.992919	17823	0	7.8064	0.00077551	0.0031205	0.822158	51	3	7.8064
Csnk2a1	4	0.99922	0.99862	0.999757	19371	0	4.3065	0.00077943	0.0031205	0.822158	52	4	4.3065
Olfr533	4	0.69049	0.72831	0.992919	13604	1	6.6614	0.00080527	0.0031496	0.822158	53	3	6.6614
Ralgapb	4	0.99917	0.99856	0.999757	19370	0	4.2261	0.00082794	0.0033237	0.822158	54	4	4.2261
Prr23a	4	0.51191	0.60389	0.992919	10932	1	2.5141	0.00086528	0.0034713	0.822158	55	2	2.5141
Ptpn11	4	0.99913	0.99841	0.999757	19369	0	6.0339	0.00086902	0.0034713	0.822158	56	4	6.0339
Actn2	4	0.99913	0.99841	0.999757	19368	0	5.0749	0.00087497	0.0034718	0.822158	57	4	5.0749
Gcm2	4	0.97835	0.9705	0.994163	18912	0	8.2112	0.00087701	0.0034718	0.822158	58	4	8.2112
Dnmt3a	4	0.99912	0.99841	0.999757	19367	0	4.7272	0.00087981	0.0034718	0.822158	59	4	4.7272
Kmt2d	4	0.99909	0.99835	0.999757	19366	0	3.6684	0.00090518	0.0035295	0.822158	60	4	3.6684
Gripap1	4	0.99909	0.99835	0.999757	19365	0	6.236	0.00091337	0.0035928	0.822158	61	4	6.236
Tcf25	4	0.9572	0.95534	0.992919	18577	0	4.493	0.00092108	0.0037081	0.822158	62	4	4.493
Tsc1	4	0.99907	0.99835	0.999757	19364	0	4.3211	0.00093259	0.0037087	0.822158	63	4	4.3211
Snrpn	4	0.75823	0.77492	0.992919	14802	1	7.5071	0.00093979	0.0038388	0.822158	64	3	7.5071
Pts	4	0.99906	0.99828	0.999757	19363	0	4.6897	0.00094246	0.0038388	0.822158	65	4	4.6897
Pank2	2	0.99905	0.99897	0.999757	19362	0	8.5679	0.00095148	0.001031	0.822158	66	2	8.5679
Dhx35	4	0.99905	0.99828	0.999757	19361	0	4.7858	0.00095363	0.0038394	0.822158	67	4	4.7858
Prss8	4	0.99663	0.99236	0.998175	19291	0	7.154	0.00095593	0.0038756	0.822158	68	4	7.154
Bhlhe40	4	0.91265	0.92331	0.992919	17732	0	7.6128	0.00097288	0.0040022	0.822158	69	3	7.6128
Slc7a8	4	0.26252	0.44319	0.992919	7308	2	-0.35317	0.00097689	0.0040027	0.822158	70	2	-0.35317
Pcbp2	4	0.9976	0.99468	0.999461	19311	0	5.403	0.00097985	0.0040027	0.822158	71	4	5.403
4931431F19Rik	3	0.53183	0.58722	0.992919	11188	1	9.6222	0.00098291	0.0027509	0.822158	72	2	9.6222
Vmn2r115	4	0.69861	0.73086	0.992919	13741	1	5.8108	0.00098447	0.0040339	0.822158	73	3	5.8108
Kcnb1	4	0.070669	0.1811	0.992919	2892	1	7.9142	0.0010078	0.0040344	0.822158	74	3	7.9142
Morf4l1	4	0.99899	0.9982	0.999757	19360	0	4.4697	0.0010128	0.0040344	0.822158	75	4	4.4697
Faf1	3	0.86205	0.87539	0.992919	16834	0	3.5447	0.0010258	0.002948	0.822158	76	2	3.5447
Zdhhc6	4	0.94601	0.94811	0.992919	18355	0	3.5592	0.0010327	0.004233	0.822158	77	4	3.5592
Ctnnbip1	4	0.99897	0.99813	0.999757	19359	0	4.9998	0.0010342	0.004233	0.822158	78	4	4.9998
Tshz1	4	0.99896	0.99813	0.999757	19358	0	5.0105	0.0010449	0.0042335	0.822158	79	4	5.0105
AA986860	4	0.99893	0.99813	0.999757	19357	0	5.0168	0.0010691	0.0042947	0.822158	80	4	5.0168
Pten	4	0.99892	0.99806	0.999757	19356	0	5.2834	0.0010814	0.0043631	0.822158	81	4	5.2834
Gbx2	4	0.6203	0.68938	0.992919	12502	1	1.577	0.0010885	0.0044336	0.822158	82	3	1.577
Pdcd10	4	0.9989	0.99791	0.999757	19355	0	4.1224	0.0011005	0.0045071	0.822158	83	4	4.1224
2210016F16Rik	4	0.99889	0.99791	0.999757	19354	0	6.3551	0.00111	0.0045076	0.822158	84	4	6.3551
Manba	4	0.99889	0.99791	0.999757	19353	0	6.6072	0.0011134	0.0045076	0.822158	85	4	6.6072
Ngfrap1	4	0.92129	0.92976	0.992919	17913	0	5.0428	0.0011217	0.0045423	0.822158	86	3	5.0428
Shroom3	4	0.7913	0.80445	0.992919	15440	0	4.8564	0.0011307	0.0046133	0.822158	87	3	4.8564
Asb8	4	0.94103	0.94433	0.992919	18259	0	6.6426	0.001133	0.0046133	0.822158	88	3	6.6426
Tpk1	4	0.60926	0.67866	0.992919	12350	1	7.2073	0.0011379	0.0046613	0.822158	89	3	7.2073
Gm15293	3	0.99851	0.99719	0.999757	19337	0	8.8273	0.0011415	0.0031512	0.822158	90	3	8.8273
Rnf151	4	0.32078	0.49386	0.992919	8465	2	0.32968	0.0011443	0.0047419	0.822158	91	2	0.32968
Selp	4	0.93048	0.93837	0.992919	18077	0	7.0912	0.001164	0.004842	0.822158	92	3	7.0912
Col26a1	4	0.99884	0.99762	0.999757	19352	0	6.3267	0.0011646	0.004842	0.822158	93	4	6.3267
Zfp426	3	0.54347	0.59088	0.992919	11358	1	9.2988	0.0011756	0.0032921	0.822158	94	2	9.2988
Vmn2r71	3	0.99882	0.99765	0.999757	19351	0	6.3474	0.0011824	0.0032926	0.822158	95	3	6.3474
Gpr119	4	0.93484	0.93991	0.992919	18154	0	7.4234	0.0011912	0.0049671	0.822158	96	3	7.4234
Grb2	3	0.49978	0.56229	0.992919	10781	1	7.8453	0.0011932	0.0033477	0.822158	97	2	7.8453
Csnk1g2	4	0.50117	0.59582	0.992919	10796	1	7.303	0.0011984	0.0049676	0.822158	98	3	7.303
Dsc2	4	0.9074	0.91414	0.992919	17619	0	0.639	0.0012001	0.0049676	0.822158	99	3	0.639
Setx	4	0.99877	0.99738	0.999757	19350	0	4.5062	0.0012322	0.0050631	0.822158	100	4	4.5062
Lrrc10	4	0.99865	0.99713	0.999757	19342	0	6.7799	0.0012468	0.0052275	0.822158	101	4	6.7799
Plbd2	4	0.60976	0.67866	0.992919	12358	1	4.2383	0.0012559	0.005228	0.822158	102	3	4.2383
Arl8b	4	0.99874	0.99728	0.999757	19349	0	6.0214	0.001257	0.0052744	0.822158	103	4	6.0214
Usp28	4	0.99873	0.99723	0.999757	19348	0	3.3185	0.0012701	0.0053893	0.822158	104	4	3.3185
Fam210b	3	0.99343	0.9886	0.996948	19209	0	8.9838	0.0012809	0.0036127	0.822158	105	3	8.9838
Slc6a18	4	0.60054	0.67134	0.992919	12176	1	6.2325	0.0013003	0.0055246	0.822158	106	3	6.2325
Chrna10	4	0.99869	0.99723	0.999757	19347	0	5.5336	0.0013112	0.0056088	0.822158	107	4	5.5336
Wsb2	4	0.95126	0.95114	0.992919	18463	0	1.1838	0.0013117	0.0056088	0.822158	108	4	1.1838
Mbd2	4	0.95083	0.95114	0.992919	18454	0	6.8528	0.0013303	0.0057048	0.822158	109	4	6.8528
Fam19a5	4	0.11871	0.25931	0.992919	4194	1	6.6728	0.0013311	0.0057048	0.822158	110	3	6.6728
Igfbp3	4	0.99866	0.99713	0.999757	19346	0	5.1698	0.0013376	0.0057048	0.822158	111	4	5.1698
Spop	4	0.99866	0.99713	0.999757	19345	0	4.1023	0.0013422	0.0057048	0.822158	112	4	4.1023
Socs6	4	0.99865	0.99713	0.999757	19344	0	5.55	0.0013521	0.0057053	0.822158	113	4	5.55
Gm13287	2	0.99865	0.9982	0.999757	19343	0	8.9513	0.0013527	0.0017983	0.822158	114	2	8.9513
Rbm15	4	0.99863	0.99708	0.999757	19341	0	4.2022	0.0013707	0.0058304	0.822158	115	4	4.2022
Apoo	4	0.97903	0.97168	0.994432	18926	0	6.8815	0.0013899	0.0058304	0.822158	116	4	6.8815
Cryz	4	0.94896	0.95027	0.992919	18422	0	7.9836	0.0013999	0.0058309	0.822158	117	4	7.9836
Olfr275	4	0.9986	0.99708	0.999757	19339	0	6.1249	0.0014003	0.0058309	0.822158	118	4	6.1249
Ccl25	3	0.99858	0.99747	0.999757	19338	0	8.1843	0.001425	0.0036729	0.822158	119	3	8.1843
3110002H16Rik	4	0.83771	0.84783	0.992919	16352	0	6.2817	0.0014392	0.0059136	0.822158	120	3	6.2817
Sphk2	3	0.98874	0.97958	0.995623	19133	0	4.0865	0.0014442	0.0038873	0.822158	121	3	4.0865
0610009O20Rik	4	0.21235	0.39458	0.992919	6322	2	3.5778	0.001471	0.0060111	0.822158	122	2	3.5778
Basp1	4	0.86191	0.86699	0.992919	16815	0	1.9471	0.001479	0.0060116	0.822158	123	2	1.9471
Ctbp2	4	0.85903	0.86339	0.992919	16775	0	6.3464	0.0014812	0.0060116	0.822158	124	3	6.3464
Pik3ap1	4	0.88963	0.89311	0.992919	17320	0	0.37067	0.0015348	0.0064935	0.850917	125	2	0.37067
4933417A18Rik	4	0.99846	0.9968	0.999757	19336	0	6.5466	0.0015408	0.0064935	0.850917	126	4	6.5466
Birc6	4	0.99846	0.9968	0.999757	19335	0	3.9341	0.0015412	0.0064935	0.850917	127	4	3.9341
Lrrc23	4	0.99843	0.9967	0.999757	19334	0	4.8091	0.0015657	0.0066743	0.862937	128	4	4.8091
Hif3a	4	0.67018	0.71481	0.992919	13272	1	5.2831	0.0016209	0.0068759	0.883122	129	3	5.2831
Rnft2	4	0.99836	0.99658	0.999757	19333	0	5.1253	0.0016445	0.0070526	0.899432	130	4	5.1253
Csn2	4	0.55691	0.64248	0.992919	11554	1	-0.068287	0.0016463	0.0071827	0.899432	131	1	-0.068287
Btn1a1	4	0.99835	0.99658	0.999757	19332	0	4.7601	0.0016495	0.0071827	0.899432	132	4	4.7601
Scai	3	0.22623	0.37744	0.992919	6618	1	-1.0063	0.0016534	0.0043626	0.822158	133	1	-1.0063
Olfr857	4	0.47119	0.58117	0.992919	10461	1	4.842	0.0016724	0.0072889	0.899432	134	3	4.842
Rara	4	0.99832	0.99658	0.999757	19331	0	5.9189	0.001678	0.0072894	0.899432	135	4	5.9189
Cnbp	4	0.9983	0.99658	0.999757	19330	0	3.2226	0.0017013	0.007513	0.899432	136	4	3.2226
Mmadhc	4	0.16565	0.32579	0.992919	5298	2	1.4397	0.0017021	0.007513	0.899432	137	2	1.4397
Ace2	4	0.057518	0.15432	0.992919	2442	1	6.2253	0.0017262	0.0078679	0.908327	138	3	6.2253
Lrrc27	4	0.92363	0.93088	0.992919	17957	0	7.1639	0.0017275	0.0078679	0.908327	139	3	7.1639
Slco5a1	4	0.99826	0.99658	0.999757	19329	0	4.7084	0.0017442	0.0078684	0.908327	140	4	4.7084
Pik3ip1	4	0.56597	0.64518	0.992919	11666	1	6.7362	0.0017474	0.0078684	0.908327	141	3	6.7362
Leap2	4	0.99823	0.99652	0.999757	19328	0	5.4457	0.001774	0.0080828	0.913828	142	4	5.4457
Zer1	4	0.99822	0.99652	0.999757	19327	0	5.0301	0.0017769	0.0080828	0.913828	143	4	5.0301
Snx25	4	0.9982	0.99647	0.999757	19326	0	4.0619	0.0018026	0.0082216	0.913828	144	4	4.0619
Focad	4	0.32732	0.49672	0.992919	8605	1	7.9758	0.0018244	0.0082222	0.913828	145	3	7.9758
Acp2	4	0.99817	0.99647	0.999757	19325	0	4.5584	0.0018277	0.0082222	0.913828	146	4	4.5584
Spp1	4	0.99815	0.99641	0.999757	19324	0	5.3612	0.001853	0.0082727	0.913828	147	4	5.3612
2011-09-01	4	0.75066	0.77091	0.992919	14674	1	4.7795	0.0018694	0.0083396	0.913828	148	2	4.7795
Golga7	4	0.99811	0.99634	0.999757	19323	0	6.1875	0.0018866	0.0083401	0.913828	149	4	6.1875
Ccdc22	3	0.57492	0.61648	0.992919	11804	1	9.1111	0.0018946	0.0049758	0.822158	150	2	9.1111
Arhgef2	3	0.9981	0.99662	0.999757	19322	0	6.1062	0.0018959	0.0049758	0.822158	151	3	6.1062
Klf9	4	0.47186	0.58117	0.992919	10468	1	0.9057	0.0019809	0.0088996	0.954175	152	2	0.9057
Krtap8-1	3	0.94113	0.92578	0.992919	18262	0	7.732	0.0019931	0.0051065	0.822158	153	3	7.732
Tgif1	4	0.998	0.99593	0.999757	19321	0	4.1202	0.0019971	0.008965	0.954175	154	4	4.1202
Rbp2	4	0.99799	0.9958	0.999757	19320	0	4.8754	0.0020077	0.0090819	0.954175	155	4	4.8754
Fam26d	4	0.69546	0.72957	0.992919	13701	1	4.9553	0.0020282	0.0091344	0.954175	156	2	4.9553
A230065H16Rik	4	0.39862	0.54772	0.992919	9659	1	7.1213	0.0020347	0.0091998	0.954175	157	3	7.1213
Hdac6	4	0.5148	0.60786	0.992919	10971	1	0.75502	0.0020367	0.0091998	0.954175	158	2	0.75502
Dbil5	4	0.037137	0.11904	0.992919	1689	1	7.0684	0.002045	0.0092003	0.954175	159	3	7.0684
Raf1	4	0.99795	0.99568	0.999757	19319	0	4.3175	0.002051	0.0092003	0.954175	160	4	4.3175
Aldh1a1	4	0.97492	0.96639	0.993276	18853	0	6.5581	0.0020655	0.0092718	0.956473	161	4	6.5581
Sprr2k	4	0.96979	0.96216	0.992919	18765	0	7.2326	0.0020904	0.0094739	0.957363	162	4	7.2326
Prr14	4	0.15693	0.30926	0.992919	5098	2	1.9588	0.0020925	0.0094745	0.957363	163	2	1.9588
Lce3c	4	0.99586	0.9918	0.99814	19271	0	7.0531	0.002104	0.0095403	0.957363	164	4	7.0531
Eif2a	4	0.99789	0.99531	0.999742	19318	0	4.3992	0.0021081	0.0095403	0.957363	165	4	4.3992
Prorsd1	3	0.85492	0.86584	0.992919	16692	0	1.7185	0.0021135	0.0052535	0.822158	166	2	1.7185
Hist1h1c	4	0.92601	0.93306	0.992919	18017	0	4.6159	0.0021408	0.0097124	0.957363	167	3	4.6159
Abhd15	4	0.76941	0.77892	0.992919	15008	1	5.4741	0.0021418	0.0097124	0.957363	168	3	5.4741
Zfp629	4	0.33154	0.50398	0.992919	8679	1	4.3597	0.0021439	0.0097124	0.957363	169	2	4.3597
4930503B20Rik	4	0.29974	0.47656	0.992919	8057	2	-0.48983	0.0021482	0.0097124	0.957363	170	2	-0.48983
Mmgt1	4	0.97088	0.96286	0.992919	18785	0	5.496	0.0021624	0.0098844	0.957363	171	4	5.496
Rnf165	4	0.15161	0.29967	0.992919	4970	1	6.9438	0.0021904	0.0099548	0.957363	172	3	6.9438
Wdr45	4	0.99781	0.99517	0.999702	19317	0	5.5966	0.002194	0.0099548	0.957363	173	4	5.5966
Gm7168	3	0.9978	0.99613	0.999757	19316	0	6.4352	0.0022003	0.0055807	0.822158	174	3	6.4352
Abhd4	3	0.9707	0.9573	0.992919	18779	0	7.2932	0.0022041	0.0055807	0.822158	175	3	7.2932
Scaf4	4	0.99776	0.99517	0.999702	19315	0	4.7557	0.0022442	0.0099554	0.957363	176	4	4.7557
Armc9	4	0.95709	0.95534	0.992919	18573	0	6.294	0.0022469	0.010031	0.957363	177	4	6.294
Zbtb46	4	0.33995	0.51497	0.992919	8838	2	0.26799	0.0022597	0.010031	0.957363	178	2	0.26799
Adh6a	4	0.71685	0.7416	0.992919	14020	1	4.3973	0.0022659	0.010031	0.957363	179	2	4.3973
Zfp148	3	0.89826	0.89732	0.992919	17456	0	7.8617	0.0022805	0.0057303	0.822158	180	3	7.8617
Psg18	4	0.97605	0.9672	0.993465	18866	0	7.1412	0.0023009	0.010181	0.963173	181	4	7.1412
Zglp1	4	0.54428	0.62915	0.992919	11370	1	4.7997	0.0023155	0.010254	0.965323	182	3	4.7997
Vps51	2	0.91485	0.88347	0.992919	17777	0	7.999	0.002358	0.0034835	0.822158	183	2	7.999
Sult1e1	4	0.99752	0.99442	0.999414	19308	0	6.5987	0.0023712	0.010414	0.966389	184	4	6.5987
Ubr4	4	0.99762	0.99477	0.999461	19314	0	5.06	0.0023766	0.010414	0.966389	185	4	5.06
Sv2c	4	0.99762	0.99477	0.999461	19313	0	4.9022	0.0023826	0.010414	0.966389	186	4	4.9022
Olfr1329	4	0.99761	0.99468	0.999461	19312	0	4.336	0.0023898	0.0105	0.969708	187	4	4.336
Olfr1214	4	0.99436	0.98889	0.996948	19240	0	7.0437	0.0024169	0.01077	0.985265	188	4	7.0437
Rgs12	4	0.62998	0.69341	0.992919	12650	1	-0.79324	0.0024269	0.01077	0.985265	189	1	-0.79324
Myog	4	0.99757	0.99451	0.999414	19310	0	5.8936	0.0024317	0.010937	0.991255	190	4	5.8936
Map1s	3	0.99756	0.99582	0.999757	19309	0	6.4802	0.0024356	0.0061469	0.822158	191	3	6.4802
D15Ertd621e	3	0.31339	0.42447	0.992919	8308	1	8.2707	0.0024395	0.0061469	0.822158	192	2	8.2707
Gcc1	3	0.9851	0.974	0.994432	19050	0	8.5693	0.0024748	0.0061469	0.822158	193	3	8.5693
Ly6c1	4	0.99612	0.99191	0.99814	19279	0	6.4406	0.0024769	0.011519	0.991255	194	4	6.4406
Opalin	4	0.88266	0.88427	0.992919	17189	0	3.0198	0.0024827	0.011519	0.991255	195	3	3.0198
Ahr	3	0.6971	0.71564	0.992919	13718	0	0.55009	0.0024899	0.0061469	0.822158	196	2	0.55009
Cdca8	2	0.9975	0.99652	0.999757	19307	0	8.6228	0.0025	0.0054899	0.822158	197	2	8.6228
Prss41	4	0.84384	0.8503	0.992919	16479	0	7.3881	0.0025189	0.011519	0.991255	198	3	7.3881
Arhgdig	4	0.99743	0.99424	0.999289	19306	0	4.0179	0.0025659	0.011683	0.991255	199	4	4.0179
Gprin3	4	0.30935	0.48225	0.992919	8240	1	6.8338	0.0026153	0.011749	0.991255	200	3	6.8338
Prkcb	4	0.70408	0.73358	0.992919	13820	1	7.1715	0.0026237	0.011749	0.991255	201	3	7.1715
Fxyd4	4	0.99737	0.99417	0.999289	19305	0	3.8113	0.0026289	0.011749	0.991255	202	4	3.8113
Lce1k	4	0.99455	0.98903	0.996948	19246	0	6.8146	0.002637	0.011828	0.991255	203	4	6.8146
Sft2d2	4	0.99137	0.98581	0.996888	19168	0	6.7947	0.0026431	0.011828	0.991255	204	4	6.7947
Gabrb2	4	0.015186	0.070253	0.992919	813	2	0.71113	0.0026499	0.011828	0.991255	205	2	0.71113
Apc	4	0.99735	0.99408	0.999284	19304	0	4.4584	0.0026523	0.011828	0.991255	206	4	4.4584
Ccdc113	4	0.99733	0.99399	0.999244	19303	0	6.684	0.0026667	0.012023	0.991255	207	4	6.684
Vezf1	4	0.99733	0.99399	0.999244	19302	0	4.2231	0.00267	0.012133	0.991255	208	4	4.2231
Fbxw7	4	0.71948	0.74291	0.992919	14074	1	3.5209	0.0026992	0.012288	0.991255	209	3	3.5209
Adgrf5	4	0.69546	0.72957	0.992919	13698	1	6.7186	0.0027004	0.012288	0.991255	210	3	6.7186
Adgrg3	4	0.14995	0.29701	0.992919	4933	2	-0.8993	0.0027056	0.012289	0.991255	211	2	-0.8993
Cybb	4	0.42887	0.56106	0.992919	9975	1	6.0516	0.0027263	0.012407	0.991255	212	3	6.0516
Capn8	4	0.55841	0.64248	0.992919	11565	1	6.1465	0.0027301	0.012491	0.991255	213	3	6.1465
Ccdc82	4	0.20038	0.38336	0.992919	6045	1	6.8168	0.0027549	0.012492	0.991255	214	3	6.8168
Pf4	4	0.17266	0.33433	0.992919	5438	1	4.4181	0.0027613	0.012492	0.991255	215	3	4.4181
Snf8	1	0.99721	0.99899	0.999757	19301	0	11.981	0.0027851	0.0010136	0.822158	216	1	11.981
Zfp821	4	0.36515	0.52829	0.992919	9309	1	6.6366	0.0028113	0.012676	0.991255	217	3	6.6366
Skap2	4	0.23482	0.41725	0.992919	6789	1	7.0955	0.0028366	0.012972	0.991255	218	3	7.0955
Vtcn1	4	0.99716	0.99364	0.999046	19300	0	4.6772	0.0028398	0.012972	0.991255	219	4	4.6772
Nfix	4	0.86191	0.86699	0.992919	16817	0	7.1739	0.0028678	0.013179	0.991255	220	3	7.1739
Gm3336	4	0.070035	0.18041	0.992919	2873	1	3.4393	0.0028728	0.013179	0.991255	221	3	3.4393
Sf3b5	1	0.99712	0.99899	0.999757	19299	0	12.73	0.0028829	0.0010136	0.822158	222	1	12.73
Acot13	4	0.99711	0.99347	0.998926	19298	0	4.8016	0.0028938	0.013256	0.991255	223	4	4.8016
Kcnmb3	4	0.97841	0.9705	0.994163	18914	0	7.1169	0.0029083	0.013256	0.991255	224	4	7.1169
Suds3	2	0.35682	0.40199	0.992919	9173	1	4.7257	0.0029435	0.0066487	0.862937	225	1	4.7257
Rab11b	3	0.18408	0.32795	0.992919	5679	1	7.3979	0.002966	0.0073201	0.899432	226	2	7.3979
Pcdhac1	4	0.99702	0.99328	0.998809	19297	0	4.3594	0.0029797	0.013546	0.991255	227	4	4.3594
Nfib	4	0.8513	0.8586	0.992919	16625	0	0.42739	0.0029842	0.013546	0.991255	228	1	0.42739
Itga6	4	0.31241	0.48801	0.992919	8296	1	8.0207	0.0029935	0.013664	0.991255	229	3	8.0207
Postn	3	0.67407	0.68664	0.992919	13340	0	8.2061	0.0030334	0.0074972	0.899432	230	2	8.2061
Mapk1	4	0.99696	0.99318	0.998792	19296	0	4.4659	0.0030364	0.014024	0.991255	231	4	4.4659
Amdhd2	4	0.50884	0.60119	0.992919	10885	1	1.1978	0.0030399	0.014024	0.991255	232	2	1.1978
Chst15	3	0.99693	0.99527	0.999742	19295	0	6.7791	0.0030699	0.0074977	0.899432	233	3	6.7791
Nt5c3	3	0.3696	0.45661	0.992919	9359	1	4.7858	0.0030752	0.0074977	0.899432	234	2	4.7858
Ino80c	4	0.91768	0.92749	0.992919	17821	0	6.8785	0.0030923	0.014024	0.991255	235	3	6.8785
Neil1	4	0.98516	0.97829	0.995594	19052	0	4.619	0.0030957	0.014219	0.991255	236	4	4.619
Ddt	4	0.95538	0.95325	0.992919	18543	0	5.9942	0.003137	0.014353	0.991255	237	4	5.9942
Olfr1471	4	0.23417	0.41624	0.992919	6782	2	-0.79933	0.0031514	0.014438	0.991255	238	1	-0.79933
Birc3	4	0.90496	0.91281	0.992919	17579	0	4.9848	0.0031552	0.014438	0.991255	239	3	4.9848
Prl3d1	3	0.99683	0.995	0.999639	19294	0	6.0796	0.003171	0.0081052	0.913828	240	3	6.0796
Cdc25c	4	0.99681	0.99282	0.998503	19293	0	3.8325	0.0031891	0.014822	0.991255	241	4	3.8325
Klk1b11	4	0.95269	0.95159	0.992919	18492	0	6.7444	0.0032025	0.014871	0.991255	242	4	6.7444
Prelid2	4	0.59344	0.66388	0.992919	12063	1	3.1224	0.0032071	0.014964	0.991255	243	2	3.1224
Olfr786	4	0.96876	0.9618	0.992919	18748	0	5.9262	0.0032377	0.015101	0.991255	244	4	5.9262
Tnks	4	0.99675	0.99257	0.998335	19292	0	5.9124	0.0032506	0.015192	0.991255	245	4	5.9124
Cnnm1	4	0.39651	0.54772	0.992919	9634	1	1.5586	0.0032628	0.015294	0.991255	246	3	1.5586
Arl14epl	4	0.90249	0.90913	0.992919	17524	0	6.692	0.0032925	0.015387	0.991255	247	3	6.692
Olfr866	4	0.93185	0.93991	0.992919	18103	0	6.3803	0.0033333	0.015388	0.991255	248	3	6.3803
AI846148	4	0.99652	0.99236	0.998175	19289	0	5.7171	0.0033361	0.015388	0.991255	249	4	5.7171
Gm15127	4	0.83974	0.84783	0.992919	16391	0	0.1603	0.0033742	0.015528	0.991255	250	1	0.1603
Tie1	4	0.98569	0.979	0.995623	19067	0	6.4413	0.0034285	0.015528	0.991255	251	4	6.4413
Trim2	4	0.99656	0.99236	0.998175	19290	0	4.1369	0.0034409	0.015528	0.991255	252	4	4.1369
Naip1	4	0.9634	0.95961	0.992919	18688	0	5.419	0.0034754	0.015529	0.991255	253	4	5.419
Fzd5	4	0.97321	0.96427	0.992919	18820	0	4.0485	0.0034856	0.015529	0.991255	254	4	4.0485
Cd300lb	4	0.99651	0.99236	0.998175	19288	0	4.339	0.0034867	0.015529	0.991255	255	4	4.339
Six2	4	0.62998	0.69341	0.992919	12642	1	5.9553	0.0035052	0.015529	0.991255	256	3	5.9553
Ctsw	4	0.19598	0.37662	0.992919	5943	1	3.7832	0.0035067	0.015529	0.991255	257	2	3.7832
Dgcr2	4	0.92633	0.93359	0.992919	18021	0	6.4279	0.0035154	0.015744	0.991255	258	3	6.4279
Dpp8	4	0.9864	0.97969	0.995623	19079	0	6.1065	0.0035224	0.015744	0.991255	259	4	6.1065
Slc9a6	4	0.93675	0.9409	0.992919	18182	0	2.556	0.0035413	0.015745	0.991255	260	3	2.556
Olfr633	4	0.85333	0.8586	0.992919	16660	0	4.2667	0.003542	0.015745	0.991255	261	2	4.2667
Yipf5	4	0.14174	0.2901	0.992919	4743	1	4.8488	0.0035499	0.015847	0.991255	262	3	4.8488
Wfdc5	3	0.99644	0.99452	0.999414	19287	0	5.6726	0.0035563	0.0091697	0.954175	263	3	5.6726
Mrpl40	1	0.99642	0.99693	0.999757	19286	0	12.477	0.0035809	0.0030731	0.822158	264	1	12.477
Mapkap1	4	0.84731	0.85079	0.992919	16557	0	1.6254	0.003597	0.015847	0.991255	265	2	1.6254
Smurf2	4	0.6074	0.67671	0.992919	12321	1	7.0922	0.0036095	0.015978	0.991255	266	3	7.0922
Naa25	2	0.83751	0.81366	0.992919	16345	0	6.9617	0.0036125	0.0076606	0.908327	267	2	6.9617
Unc13b	3	0.99638	0.99423	0.999289	19285	0	5.1623	0.003623	0.012482	0.991255	268	3	5.1623
Rpl39l	4	0.67477	0.71884	0.992919	13345	1	0.89693	0.0036527	0.015978	0.991255	269	2	0.89693
Ptchd1	4	0.78646	0.79384	0.992919	15336	0	6.5207	0.0036557	0.015978	0.991255	270	3	6.5207
Bub1	3	0.9963	0.99394	0.999244	19284	0	5.1994	0.0037046	0.01296	0.991255	271	3	5.1994
Klri1	4	0.67669	0.72021	0.992919	13376	1	6.3338	0.0037189	0.01633	0.991255	272	3	6.3338
Pcdhga3	4	0.13645	0.28054	0.992919	4615	1	5.0121	0.0037415	0.016331	0.991255	273	3	5.0121
D330045A20Rik	4	0.046709	0.13432	0.992919	2048	1	4.9566	0.0037536	0.016468	0.991255	274	3	4.9566
Mier3	4	0.90585	0.91313	0.992919	17588	0	2.9408	0.003764	0.016468	0.991255	275	2	2.9408
Olfr1342	4	0.99623	0.99224	0.998175	19283	0	4.849	0.0037694	0.016468	0.991255	276	4	4.849
Tapbpl	4	0.9962	0.99224	0.998175	19282	0	5.1568	0.0037987	0.016469	0.991255	277	4	5.1568
Fam89b	4	0.40389	0.55041	0.992919	9716	1	6.9698	0.0038011	0.016469	0.991255	278	3	6.9698
Klrd1	4	0.99619	0.99224	0.998175	19281	0	5.6611	0.003812	0.016469	0.991255	279	4	5.6611
Proz	4	0.54804	0.63454	0.992919	11422	1	3.7643	0.0038197	0.016469	0.991255	280	3	3.7643
Bcor	4	0.99613	0.99202	0.998175	19280	0	2.6325	0.0038654	0.016671	0.991255	281	4	2.6325
Ispd	4	0.74804	0.7649	0.992919	14639	1	6.2842	0.0038721	0.016671	0.991255	282	3	6.2842
Xbp1	4	0.41407	0.55704	0.992919	9816	1	3.3739	0.0038754	0.016671	0.991255	283	2	3.3739
Rap2b	4	0.47715	0.58252	0.992919	10527	1	3.5824	0.003876	0.016671	0.991255	284	2	3.5824
Apol6	4	0.90678	0.91313	0.992919	17612	0	5.4731	0.0038884	0.016772	0.991255	285	3	5.4731
Epb4.1	4	0.71789	0.7416	0.992919	14042	1	7.0733	0.0038893	0.016772	0.991255	286	3	7.0733
Gjb5	4	0.99611	0.99191	0.99814	19278	0	5.566	0.0038914	0.016772	0.991255	287	4	5.566
Dlx6	4	0.87546	0.87843	0.992919	17064	0	6.627	0.0039173	0.016877	0.991255	288	3	6.627
Ccdc94	2	0.86373	0.83962	0.992919	16854	0	6.8883	0.0039191	0.0078214	0.908327	289	2	6.8883
Papolg	4	0.55691	0.64248	0.992919	11553	1	2.3091	0.0039311	0.016877	0.991255	290	2	2.3091
Hnf1b	4	0.99382	0.98799	0.996948	19220	0	6.1125	0.0039314	0.016877	0.991255	291	4	6.1125
Csad	4	0.8515	0.8586	0.992919	16629	0	6.7601	0.0039503	0.016877	0.991255	292	3	6.7601
Stard3	4	0.79955	0.81747	0.992919	15597	0	4.8947	0.0039868	0.016877	0.991255	293	3	4.8947
Cenpw	1	0.996	0.99693	0.999757	19277	0	12.304	0.0039997	0.0030736	0.822158	294	1	12.304
Mc5r	4	0.99598	0.9918	0.99814	19276	0	4.8303	0.0040209	0.016878	0.991255	295	4	4.8303
Olfr538	4	0.60444	0.67405	0.992919	12278	1	7.0918	0.0040247	0.016878	0.991255	296	3	7.0918
6430573F11Rik	4	0.98713	0.98053	0.995623	19091	0	6.2686	0.0040294	0.016878	0.991255	297	4	6.2686
Hoxa2	4	0.99597	0.9918	0.99814	19275	0	5.7324	0.0040316	0.016878	0.991255	298	4	5.7324
Casp14	4	0.20697	0.39088	0.992919	6201	1	6.8414	0.0040342	0.016878	0.991255	299	3	6.8414
Hoxc12	4	0.99597	0.9918	0.99814	19274	0	2.966	0.0040343	0.016878	0.991255	300	4	2.966
Ehmt1	3	0.3233	0.42739	0.992919	8525	1	0.56123	0.0040362	0.013844	0.991255	301	2	0.56123
Gpx1	4	0.734	0.75482	0.992919	14353	1	-0.10456	0.0040424	0.016878	0.991255	302	1	-0.10456
C2	4	0.12857	0.26982	0.992919	4428	1	7.4395	0.0040486	0.016878	0.991255	303	3	7.4395
Tomt	4	0.99591	0.9918	0.99814	19273	0	4.8278	0.0040927	0.016878	0.991255	304	4	4.8278
Iigp1	4	0.73586	0.75615	0.992919	14388	1	6.9284	0.0041048	0.016878	0.991255	305	3	6.9284
Pemt	4	0.99589	0.9918	0.99814	19272	0	5.1932	0.0041099	0.016878	0.991255	306	4	5.1932
Angptl3	3	0.84905	0.86339	0.992919	16588	0	7.803	0.0041235	0.013844	0.991255	307	2	7.803
Ctsq	4	0.36021	0.52624	0.992919	9250	1	-0.01624	0.0041538	0.017016	0.991255	308	2	-0.01624
1700123I01Rik	4	0.07587	0.19432	0.992919	3056	2	-1.1702	0.0042094	0.017165	0.991255	309	1	-1.1702
Vmn1r31	3	0.98959	0.98138	0.995623	19140	0	7.2419	0.0042301	0.013957	0.991255	310	3	7.2419
Fut7	4	0.99574	0.99168	0.99814	19270	0	4.0547	0.0042588	0.017784	0.991255	311	4	4.0547
Zcchc4	4	0.098197	0.23182	0.992919	3729	2	-0.87153	0.0042651	0.017784	0.991255	312	2	-0.87153
Bckdk	4	0.98632	0.97969	0.995623	19075	0	3.3071	0.0043208	0.018192	0.991255	313	4	3.3071
Fgfr3	3	0.99568	0.9933	0.998809	19269	0	5.7015	0.004325	0.014174	0.991255	314	3	5.7015
Opn4	4	0.39731	0.54772	0.992919	9644	1	6.3853	0.0043295	0.018339	0.991255	315	3	6.3853
Senp3	1	0.99565	0.99588	0.999757	19268	0	12.379	0.0043487	0.0041181	0.822158	316	1	12.379
Snhg11	4	0.97581	0.9672	0.993465	18860	0	6.3078	0.004363	0.018339	0.991255	317	4	6.3078
B3gnt4	4	0.095548	0.23042	0.992919	3670	1	1.0411	0.0043764	0.018488	0.991255	318	2	1.0411
Slc32a1	4	0.86792	0.86882	0.992919	16933	0	4.1401	0.0044063	0.018488	0.991255	319	2	4.1401
Cck	4	0.99558	0.99124	0.99814	19267	0	6.8654	0.0044221	0.018488	0.991255	320	4	6.8654
Gm7903	4	0.80989	0.82265	0.992919	15781	0	2.2864	0.0044321	0.018637	0.991255	321	2	2.2864
Entpd4	4	0.81297	0.82432	0.992919	15848	0	6.2178	0.004444	0.018637	0.991255	322	3	6.2178
Hspa4l	4	0.86456	0.86882	0.992919	16865	0	4.8298	0.004481	0.018867	0.991255	323	3	4.8298
Olfr313	4	0.99552	0.99099	0.997985	19266	0	2.7529	0.0044847	0.018867	0.991255	324	4	2.7529
Rad50	1	0.99547	0.99588	0.999757	19265	0	11.655	0.0045302	0.0041181	0.822158	325	1	11.655
Gsr	4	0.087945	0.21495	0.992919	3480	2	0.25807	0.0045434	0.018973	0.991255	326	2	0.25807
Kmo	4	0.93484	0.93991	0.992919	18135	0	6.6702	0.00455	0.018973	0.991255	327	3	6.6702
Pou2f2	4	0.72249	0.7436	0.992919	14143	1	6.8181	0.0045846	0.018973	0.991255	328	3	6.8181
Cd37	4	0.53102	0.61979	0.992919	11179	1	6.1295	0.0045933	0.018973	0.991255	329	3	6.1295
Fbn1	4	0.38073	0.53696	0.992919	9459	1	1.5171	0.0045991	0.018973	0.991255	330	2	1.5171
Gabra1	4	0.99166	0.98597	0.996888	19170	0	5.5358	0.004641	0.018974	0.991255	331	4	5.5358
Olfr1201	4	0.96551	0.96074	0.992919	18715	0	6.3919	0.004642	0.018974	0.991255	332	4	6.3919
Fxyd1	4	0.29274	0.4734	0.992919	7910	1	0.04929	0.0046547	0.018974	0.991255	333	2	0.04929
Lpcat2	3	0.88468	0.89029	0.992919	17230	0	0.95298	0.0046626	0.015136	0.991255	334	2	0.95298
Zfp112	4	0.88237	0.88387	0.992919	17187	0	5.2355	0.0046635	0.018974	0.991255	335	3	5.2355
Clns1a	2	0.55251	0.57278	0.992919	11488	0	6.3342	0.0046713	0.0089941	0.954175	336	1	6.3342
Ece2	4	0.99528	0.99069	0.997824	19264	0	3.5486	0.00472	0.019136	0.991255	337	4	3.5486
Gpr101	4	0.47276	0.58252	0.992919	10482	1	5.8907	0.0047263	0.019189	0.991255	338	3	5.8907
Casp3	4	0.99526	0.99063	0.997824	19263	0	6.2125	0.0047366	0.01919	0.991255	339	4	6.2125
Hs6st3	4	0.89592	0.90273	0.992919	17419	0	6.0223	0.0047705	0.023393	0.991255	340	3	6.0223
Wtap	4	0.99135	0.98581	0.996888	19167	0	3.8683	0.0047765	0.023393	0.991255	341	4	3.8683
Olfr490	3	0.99521	0.99284	0.998503	19262	0	4.9311	0.0047934	0.015487	0.991255	342	3	4.9311
Tigd5	4	0.9952	0.9905	0.997805	19261	0	5.3888	0.0047984	0.023393	0.991255	343	4	5.3888
Lgr4	4	0.98976	0.98361	0.996401	19141	0	7.2163	0.0048008	0.023393	0.991255	344	4	7.2163
Tgfb2	4	0.92258	0.93032	0.992919	17938	0	6.4936	0.0048151	0.023512	0.991255	345	3	6.4936
Asic3	4	0.98312	0.97529	0.994432	19000	0	1.5277	0.0048216	0.023512	0.991255	346	4	1.5277
Pan3	4	0.99518	0.99037	0.997724	19260	0	4.1149	0.0048239	0.023512	0.991255	347	4	4.1149
Olfr1039	4	0.91311	0.92392	0.992919	17743	0	6.7728	0.0048527	0.023629	0.991255	348	3	6.7728
Nfatc1	4	0.090696	0.21775	0.992919	3557	1	5.5009	0.0048599	0.023742	0.991255	349	3	5.5009
Mxra7	4	0.99512	0.99011	0.997515	19259	0	5.2658	0.0048762	0.023743	0.991255	350	4	5.2658
Cyp4f18	4	0.069982	0.18041	0.992919	2872	1	0.66501	0.0048773	0.023743	0.991255	351	2	0.66501
Qser1	4	0.9806	0.97311	0.994432	18953	0	5.1779	0.0048816	0.023743	0.991255	352	4	5.1779
Satb2	3	0.99252	0.98711	0.996888	19186	0	8.0846	0.0048876	0.01559	0.991255	353	3	8.0846
Dcp2	4	0.95678	0.95448	0.992919	18567	0	5.9065	0.0049068	0.023888	0.991255	354	4	5.9065
Il13ra1	4	0.21928	0.40002	0.992919	6466	1	6.296	0.0049267	0.024124	0.991255	355	3	6.296
Gnmt	4	0.80782	0.82091	0.992919	15748	0	2.892	0.0049329	0.024124	0.991255	356	2	2.892
Pih1d1	1	0.99506	0.99588	0.999757	19258	0	12.262	0.0049351	0.0041186	0.822158	357	1	12.262
2310035C23Rik	4	0.41079	0.55443	0.992919	9777	1	5.3614	0.0049461	0.024124	0.991255	358	3	5.3614
Ccl11	4	0.87169	0.87364	0.992919	17018	0	5.9254	0.0049504	0.024124	0.991255	359	3	5.9254
Myo5b	4	0.92103	0.92976	0.992919	17908	0	4.8451	0.0049553	0.024124	0.991255	360	3	4.8451
Pitx3	4	0.18664	0.36354	0.992919	5739	1	6.361	0.0049595	0.024124	0.991255	361	3	6.361
Eid2	4	0.83161	0.84264	0.992919	16245	0	2.5155	0.0049885	0.024124	0.991255	362	3	2.5155
Shmt2	4	0.99499	0.98984	0.997298	19257	0	3.7039	0.0050074	0.024124	0.991255	363	4	3.7039
Neu2	4	0.34506	0.51612	0.992919	8943	2	3.8369	0.005011	0.024124	0.991255	364	2	3.8369
F2rl1	4	0.55263	0.64116	0.992919	11494	1	4.6567	0.005025	0.024124	0.991255	365	3	4.6567
Ddx19b	3	0.33202	0.43477	0.992919	8682	1	6.7145	0.0050383	0.016369	0.991255	366	2	6.7145
Ppp1r37	4	0.61241	0.68138	0.992919	12392	1	0.50216	0.0050442	0.024124	0.991255	367	2	0.50216
Olfr1419	4	0.21668	0.3983	0.992919	6412	1	6.4238	0.0050973	0.024247	0.991255	368	3	6.4238
Ptbp3	4	0.8428	0.84981	0.992919	16472	0	1.9199	0.0050998	0.024247	0.991255	369	3	1.9199
Tmem240	4	0.99485	0.98971	0.997214	19256	0	5.9187	0.0051454	0.024248	0.991255	370	4	5.9187
Ppm1f	4	0.49555	0.59316	0.992919	10737	1	-0.17995	0.0051554	0.024248	0.991255	371	1	-0.17995
Fhl1	4	0.99484	0.98971	0.997214	19255	0	3.8641	0.0051572	0.024248	0.991255	372	4	3.8641
Arhgef11	4	0.99484	0.98971	0.997214	19254	0	4.5159	0.0051637	0.024248	0.991255	373	4	4.5159
Otop3	4	0.99242	0.98629	0.996888	19184	0	6.4869	0.0051681	0.024248	0.991255	374	4	6.4869
Olfr9	4	0.99483	0.98971	0.997214	19253	0	6.1254	0.0051712	0.024248	0.991255	375	4	6.1254
Mettl7a1	4	0.58215	0.65592	0.992919	11915	1	1.137	0.0052111	0.024851	0.991255	376	2	1.137
Trim71	4	0.99479	0.98958	0.997214	19252	0	2.7022	0.0052134	0.024851	0.991255	377	4	2.7022
Olfr191	4	0.99478	0.98958	0.997214	19251	0	5.048	0.0052209	0.024851	0.991255	378	4	5.048
Chst10	4	0.99478	0.98958	0.997214	19250	0	5.1687	0.0052242	0.024851	0.991255	379	4	5.1687
Cwc25	4	0.10239	0.23626	0.992919	3831	1	4.667	0.0052605	0.025379	0.991255	380	2	4.667
Hoga1	4	0.59153	0.66388	0.992919	12033	1	0.73065	0.0052667	0.025379	0.991255	381	2	0.73065
Olfr215	4	0.88824	0.89157	0.992919	17291	0	3.5297	0.0053223	0.025379	0.991255	382	3	3.5297
Ltc4s	2	0.99464	0.99186	0.99814	19249	0	7.0429	0.0053607	0.01007	0.957363	383	2	7.0429
Scd4	3	0.99463	0.99167	0.99814	19248	0	6.2254	0.0053661	0.017046	0.991255	384	3	6.2254
Slc35f2	4	0.36444	0.52624	0.992919	9304	1	6.2027	0.0053765	0.0262	0.991255	385	3	6.2027
Cntfr	3	0.53991	0.59015	0.992919	11305	1	6.515	0.0053791	0.017046	0.991255	386	2	6.515
Edf1	4	0.15215	0.30059	0.992919	4984	1	5.6049	0.0054169	0.026329	0.991255	387	3	5.6049
Fam53c	4	0.99458	0.98903	0.996948	19247	0	3.8834	0.0054206	0.026329	0.991255	388	4	3.8834
Numbl	4	0.084493	0.21146	0.992919	3355	1	5.9146	0.0054247	0.026329	0.991255	389	3	5.9146
Zic4	4	0.9813	0.97397	0.994432	18966	0	5.8251	0.0054305	0.026329	0.991255	390	4	5.8251
Tnrc6a	4	0.75414	0.77227	0.992919	14736	1	4.7567	0.0054335	0.026329	0.991255	391	3	4.7567
Snx19	4	0.17578	0.34006	0.992919	5498	1	6.1	0.0054343	0.026329	0.991255	392	3	6.1
Zfp780b	4	0.4989	0.59582	0.992919	10771	1	6.1318	0.0054459	0.026329	0.991255	393	3	6.1318
Cacna1g	3	0.97947	0.96586	0.993276	18937	0	3.6802	0.0054556	0.017159	0.991255	394	3	3.6802
Olfr1406	4	0.0091763	0.045822	0.992919	554	3	-2.2233	0.0054892	0.026594	0.991255	395	1	-2.2233
Tmco5	4	0.98369	0.97609	0.994432	19016	0	7.2882	0.0055022	0.026594	0.991255	396	4	7.2882
Pttg1ip	4	0.99448	0.98903	0.996948	19243	0	5.082	0.0055228	0.026595	0.991255	397	4	5.082
Mageb16	4	0.99448	0.98903	0.996948	19245	0	5.2071	0.0055228	0.026595	0.991255	398	4	5.2071
Rbm45	4	0.99448	0.98903	0.996948	19244	0	3.8212	0.0055228	0.026595	0.991255	399	4	3.8212
Usp49	3	0.96689	0.95325	0.992919	18732	0	4.0668	0.0055391	0.017519	0.991255	400	3	4.0668
Olfr222	4	0.23468	0.41624	0.992919	6787	1	2.5419	0.0055448	0.026595	0.991255	401	3	2.5419
Xylt2	3	0.99438	0.99142	0.99814	19242	0	6.9614	0.0056203	0.017771	0.991255	402	3	6.9614
Ssty1	4	0.99437	0.98889	0.996948	19241	0	3.3896	0.0056305	0.02703	0.991255	403	4	3.3896
Gm17365	4	0.59426	0.66656	0.992919	12072	1	5.662	0.0056535	0.027159	0.991255	404	3	5.662
Gm5885	3	0.99433	0.99142	0.99814	19239	0	5.6094	0.0056695	0.017771	0.991255	405	3	5.6094
Slc38a8	4	0.99432	0.98874	0.996948	19238	0	4.6936	0.0056777	0.027159	0.991255	406	4	4.6936
Zmiz1	4	0.99431	0.98874	0.996948	19237	0	4.8476	0.0056928	0.02716	0.991255	407	4	4.8476
Ssna1	4	0.99429	0.98874	0.996948	19236	0	4.2498	0.0057055	0.02716	0.991255	408	4	4.2498
Flnc	4	0.92051	0.92976	0.992919	17893	0	4.9093	0.0057072	0.02716	0.991255	409	3	4.9093
Pdzrn4	4	0.5915	0.66388	0.992919	12032	1	0.72804	0.0057116	0.02716	0.991255	410	2	0.72804
Dazap2	3	0.90828	0.90476	0.992919	17638	0	7.5896	0.0057146	0.017887	0.991255	411	3	7.5896
Krtap19-1	3	0.99428	0.99129	0.99814	19235	0	4.9615	0.0057189	0.017887	0.991255	412	3	4.9615
Olfr527	4	0.99427	0.98859	0.996948	19234	0	5.4372	0.0057264	0.027296	0.991255	413	4	5.4372
Havcr2	4	0.57015	0.64791	0.992919	11739	1	5.0077	0.0057369	0.027296	0.991255	414	3	5.0077
Qprt	4	0.31538	0.49057	0.992919	8362	2	0.16515	0.0057672	0.027296	0.991255	415	2	0.16515
Vmn2r62	4	0.89799	0.90494	0.992919	17454	0	7.0464	0.0057767	0.027296	0.991255	416	3	7.0464
Trank1	3	0.96605	0.95285	0.992919	18722	0	7.4252	0.0057822	0.018239	0.991255	417	3	7.4252
Ankrd66	4	0.03148	0.11091	0.992919	1482	1	-0.093328	0.0058228	0.027431	0.991255	418	1	-0.093328
Pomk	4	0.91109	0.92023	0.992919	17700	0	7.0924	0.0058317	0.027431	0.991255	419	3	7.0924
Spidr	3	0.93698	0.92213	0.992919	18202	0	7.8145	0.005843	0.01824	0.991255	420	3	7.8145
Pcsk1n	4	0.78025	0.79193	0.992919	15226	0	4.8279	0.0058566	0.027431	0.991255	421	3	4.8279
Wdr83	4	0.99414	0.98844	0.996948	19233	0	3.1934	0.0058577	0.027431	0.991255	422	4	3.1934
Zic5	4	0.72623	0.74818	0.992919	14207	1	4.7989	0.0059018	0.027595	0.991255	423	2	4.7989
Zfp65	4	0.99409	0.98844	0.996948	19232	0	5.9472	0.0059063	0.027596	0.991255	424	4	5.9472
Mkx	4	0.99409	0.98844	0.996948	19231	0	3.1452	0.0059141	0.027596	0.991255	425	4	3.1452
Nt5c2	4	0.99407	0.98844	0.996948	19230	0	5.9452	0.0059343	0.027882	0.991255	426	4	5.9452
Kdm2b	4	0.99406	0.98844	0.996948	19229	0	4.9268	0.0059373	0.027882	0.991255	427	4	4.9268
Akr1d1	4	0.14775	0.29613	0.992919	4891	1	5.9405	0.0059421	0.027882	0.991255	428	3	5.9405
Evi2a	4	0.71374	0.73891	0.992919	13972	1	4.9546	0.0059522	0.027883	0.991255	429	3	4.9546
Amd1	3	0.56375	0.60632	0.992919	11639	1	-0.48366	0.0059563	0.019029	0.991255	430	1	-0.48366
Mrgprh	4	0.95188	0.95159	0.992919	18477	0	5.0635	0.00596	0.027883	0.991255	431	4	5.0635
Extl1	4	0.99403	0.98844	0.996948	19228	0	3.9544	0.0059685	0.027883	0.991255	432	4	3.9544
Ccdc78	3	0.99402	0.99072	0.997824	19226	0	4.7914	0.0059841	0.019167	0.991255	433	3	4.7914
Tas2r124	4	0.60641	0.67472	0.992919	12309	1	6.3591	0.0059888	0.028024	0.991255	434	3	6.3591
Eno4	4	0.20711	0.39088	0.992919	6205	2	-0.30938	0.0059896	0.028024	0.991255	435	2	-0.30938
Fam120c	3	0.99401	0.99059	0.997824	19225	0	6.4749	0.0059937	0.019294	0.991255	436	3	6.4749
Armc2	4	0.994	0.98828	0.996948	19224	0	4.6678	0.0059979	0.028024	0.991255	437	4	4.6678
Zfp280c	4	0.66148	0.70944	0.992919	13145	1	3.2542	0.0060028	0.028024	0.991255	438	2	3.2542
Asah1	4	0.57848	0.65328	0.992919	11850	1	6.373	0.0060362	0.028314	0.991255	439	3	6.373
Ddx17	4	0.99396	0.98828	0.996948	19223	0	2.8985	0.0060383	0.028314	0.991255	440	4	2.8985
1700028P14Rik	3	0.63327	0.65581	0.992919	12709	1	7.9558	0.0060418	0.019567	0.991255	441	2	7.9558
Ncs1	4	0.16514	0.32579	0.992919	5284	2	0.7479	0.0060452	0.028445	0.991255	442	2	0.7479
Olfr97	3	0.89242	0.89531	0.992919	17367	0	7.9296	0.0060564	0.019567	0.991255	443	3	7.9296
Areg	4	0.99394	0.98813	0.996948	19222	0	5.6075	0.0060625	0.028751	0.991255	444	4	5.6075
Recql4	3	0.96611	0.95325	0.992919	18723	0	7.3048	0.0060783	0.019568	0.991255	445	3	7.3048
Cnfn	4	0.81187	0.82431	0.992919	15831	0	6.3152	0.0061088	0.028752	0.991255	446	3	6.3152
Fgfr2	4	0.85507	0.86049	0.992919	16696	0	3.4982	0.0061097	0.028752	0.991255	447	2	3.4982
Nmt1	4	0.99385	0.98799	0.996948	19221	0	3.8277	0.0061467	0.028876	0.991255	448	4	3.8277
Cox8c	4	0.88007	0.88179	0.992919	17143	0	5.8282	0.0061506	0.028876	0.991255	449	3	5.8282
Ccsap	4	0.95368	0.952	0.992919	18506	0	2.9435	0.0061563	0.028876	0.991255	450	4	2.9435
Cd209a	4	0.99379	0.98787	0.996948	19219	0	5.988	0.0062125	0.029155	0.991255	451	4	5.988
Cdyl2	4	0.036648	0.11841	0.992919	1666	2	3.1712	0.0062227	0.029155	0.991255	452	2	3.1712
Pcgf3	4	0.83891	0.84783	0.992919	16377	0	5.2894	0.0062279	0.029155	0.991255	453	3	5.2894
Tmem106c	3	0.99377	0.98939	0.997214	19218	0	5.1719	0.0062303	0.020398	0.991255	454	3	5.1719
Ctxn3	4	0.43191	0.56106	0.992919	10012	1	4.1474	0.0062382	0.029155	0.991255	455	3	4.1474
Olfr796	4	0.5391	0.61979	0.992919	11294	1	0.16271	0.0062675	0.029156	0.991255	456	1	0.16271
Olfr99	4	0.52412	0.61447	0.992919	11094	1	6.3648	0.0062918	0.029156	0.991255	457	3	6.3648
Olfr654	4	0.87042	0.87318	0.992919	16971	0	7.1277	0.0063003	0.029444	0.991255	458	3	7.1277
Cacnb4	4	0.95634	0.95448	0.992919	18558	0	6.0808	0.0063067	0.029444	0.991255	459	4	6.0808
Stc2	4	0.37847	0.53564	0.992919	9436	1	3.2529	0.0063231	0.029747	0.991255	460	3	3.2529
Ovol1	4	0.99365	0.98764	0.996888	19217	0	4.2216	0.006354	0.02982	0.991255	461	4	4.2216
Pitx1	4	0.89986	0.90601	0.992919	17472	0	6.0593	0.0063771	0.029894	0.991255	462	3	6.0593
Cyth4	4	0.36308	0.52624	0.992919	9288	1	1.7991	0.0063787	0.029894	0.991255	463	3	1.7991
Gucy2c	3	0.99361	0.98877	0.996948	19216	0	4.6702	0.0063905	0.021237	0.991255	464	3	4.6702
Tnrc18	4	0.99361	0.98755	0.996888	19215	0	3.5387	0.006393	0.029894	0.991255	465	4	3.5387
Tspo	4	0.38532	0.54237	0.992919	9500	1	6.2567	0.0064136	0.029894	0.991255	466	3	6.2567
Ackr2	4	0.99357	0.98755	0.996888	19214	0	3.4589	0.006431	0.029894	0.991255	467	4	3.4589
Dvl3	4	0.94358	0.9472	0.992919	18308	0	6.1766	0.0064437	0.029894	0.991255	468	3	6.1766
Gm648	4	0.77449	0.78678	0.992919	15110	0	5.7512	0.0064675	0.029894	0.991255	469	3	5.7512
Zfp473	3	0.33247	0.43477	0.992919	8693	1	7.4137	0.0064904	0.021664	0.991255	470	2	7.4137
Sult2a5	3	0.71975	0.73153	0.992919	14079	0	4.2181	0.0064985	0.021664	0.991255	471	2	4.2181
Trim26	4	0.56086	0.64248	0.992919	11605	1	5.8846	0.0065043	0.030061	0.991255	472	3	5.8846
Olfr808	4	0.99348	0.98755	0.996888	19213	0	2.9092	0.0065189	0.03024	0.991255	473	4	2.9092
Vmn1r126	3	0.67485	0.68734	0.992919	13353	0	7.0458	0.0065402	0.021664	0.991255	474	2	7.0458
Rchy1	4	0.99346	0.98755	0.996888	19212	0	3.6791	0.0065433	0.03024	0.991255	475	4	3.6791
Arhgef26	4	0.051462	0.14311	0.992919	2214	2	-0.96544	0.0065454	0.030241	0.991255	476	1	-0.96544
Il15	4	0.99344	0.98755	0.996888	19211	0	5.3898	0.0065562	0.030241	0.991255	477	4	5.3898
Olfr1346	4	0.99343	0.98755	0.996888	19210	0	4.0869	0.0065665	0.030241	0.991255	478	4	4.0869
Nlk	4	0.45912	0.57643	0.992919	10325	1	4.741	0.0065835	0.030521	0.991255	479	3	4.741
Lpar2	4	0.99341	0.98755	0.996888	19208	0	2.7038	0.0065923	0.030521	0.991255	480	4	2.7038
Ehmt2	4	0.41654	0.55704	0.992919	9841	1	-1.0222	0.0066009	0.030521	0.991255	481	1	-1.0222
Ube2q1	4	0.99336	0.98755	0.996888	19207	0	6.263	0.0066376	0.030694	0.991255	482	4	6.263
Socs5	4	0.52696	0.61708	0.992919	11123	1	4.8018	0.006642	0.030694	0.991255	483	3	4.8018
Mogat1	4	0.66252	0.71077	0.992919	13163	1	0.7168	0.0066565	0.030694	0.991255	484	2	0.7168
Ntpcr	4	0.98162	0.97423	0.994432	18971	0	6.7844	0.0066661	0.030831	0.991255	485	4	6.7844
Sgpp2	4	0.84947	0.85667	0.992919	16598	0	6.7646	0.0066948	0.030966	0.991255	486	3	6.7646
Vwc2	4	0.99328	0.98724	0.996888	19205	0	5.0336	0.0067224	0.030966	0.991255	487	4	5.0336
Lce6a	4	0.99326	0.98724	0.996888	19204	0	3.46	0.0067408	0.030966	0.991255	488	4	3.46
Wnt8b	4	0.99326	0.98724	0.996888	19203	0	3.3075	0.0067434	0.030966	0.991255	489	4	3.3075
Tmc7	4	0.38237	0.53696	0.992919	9470	1	4.2725	0.0067434	0.030966	0.991255	490	2	4.2725
Pigw	4	0.21949	0.40002	0.992919	6469	1	1.1097	0.0067676	0.030967	0.991255	491	2	1.1097
1200014J11Rik	4	0.90382	0.91046	0.992919	17547	0	6.2076	0.0068081	0.031293	0.991255	492	3	6.2076
Apoc2	4	0.99319	0.98724	0.996888	19202	0	3.4316	0.0068133	0.031293	0.991255	493	4	3.4316
St8sia4	4	0.41586	0.55704	0.992919	9836	1	4.7554	0.0068187	0.031293	0.991255	494	3	4.7554
Arid3b	4	0.17703	0.34289	0.992919	5525	1	5.7233	0.0068193	0.031293	0.991255	495	3	5.7233
Hint3	4	0.86191	0.86699	0.992919	16811	0	1.5257	0.0068232	0.031293	0.991255	496	2	1.5257
Usp14	3	0.48028	0.54322	0.992919	10561	1	7.2637	0.0068303	0.022805	0.991255	497	2	7.2637
Il3	4	0.99317	0.98724	0.996888	19201	0	4.2512	0.0068326	0.031293	0.991255	498	4	4.2512
Zfp488	4	0.0038473	0.017848	0.992919	240	2	-0.91171	0.0068787	0.031293	0.991255	499	1	-0.91171
Slc6a19	4	0.91915	0.92865	0.992919	17854	0	5.4051	0.0068889	0.031623	0.991255	500	3	5.4051
Slc24a4	3	0.86499	0.87695	0.992919	16879	0	1.0075	0.0069155	0.022805	0.991255	501	2	1.0075
Tex2	4	0.93037	0.93837	0.992919	18074	0	5.1167	0.0069343	0.031624	0.991255	502	3	5.1167
Btla	4	0.99305	0.98707	0.996888	19200	0	4.0328	0.0069481	0.031624	0.991255	503	4	4.0328
Olfr1311	4	0.97781	0.9705	0.994163	18900	0	6.7712	0.0069497	0.031624	0.991255	504	4	6.7712
Sla2	4	0.99303	0.98707	0.996888	19199	0	4.9981	0.0069683	0.031794	0.991255	505	4	4.9981
Dtnb	4	0.77355	0.78549	0.992919	15097	0	2.2008	0.0069898	0.031794	0.991255	506	2	2.2008
Rprd1b	4	0.99301	0.98707	0.996888	19198	0	4.1405	0.0069939	0.031794	0.991255	507	4	4.1405
Fer1l4	3	0.993	0.98761	0.996888	19197	0	6.3042	0.0070049	0.023102	0.991255	508	3	6.3042
Zfp128	3	0.99299	0.98761	0.996888	19196	0	5.4595	0.0070079	0.023102	0.991255	509	3	5.4595
Barx2	4	0.99298	0.9869	0.996888	19195	0	4.0839	0.0070196	0.031938	0.991255	510	4	4.0839
Wfdc8	4	0.98864	0.98281	0.996058	19126	0	5.7267	0.007027	0.031938	0.991255	511	4	5.7267
Map3k1	4	0.08377	0.21016	0.992919	3336	2	2.6205	0.0070454	0.032067	0.991255	512	2	2.6205
Mdm1	4	0.84812	0.85276	0.992919	16567	0	5.7913	0.0070498	0.032067	0.991255	513	3	5.7913
Atp13a4	4	0.022837	0.094094	0.992919	1127	2	2.7936	0.0071009	0.032537	0.991255	514	2	2.7936
Pvr	4	0.96551	0.96074	0.992919	18714	0	5.8173	0.0071116	0.032537	0.991255	515	4	5.8173
Mgst2	4	0.99288	0.9866	0.996888	19194	0	5.4821	0.0071244	0.032537	0.991255	516	4	5.4821
Tra2b	4	0.99287	0.9866	0.996888	19193	0	4.7195	0.0071258	0.032537	0.991255	517	4	4.7195
Gpalpp1	4	0.99286	0.9866	0.996888	19192	0	3.5847	0.0071368	0.032537	0.991255	518	4	3.5847
Zeb2	4	0.064602	0.16518	0.992919	2680	1	2.5347	0.0071565	0.032538	0.991255	519	2	2.5347
Phox2b	3	0.92889	0.91604	0.992919	18064	0	1.8822	0.0071656	0.023257	0.991255	520	3	1.8822
Pitpna	4	0.82401	0.83622	0.992919	16091	0	6.3903	0.0071738	0.032538	0.991255	521	3	6.3903
Olfr508	4	0.82469	0.83622	0.992919	16103	0	6.9205	0.0072174	0.032886	0.991255	522	3	6.9205
Hsd3b2	3	0.99202	0.98609	0.996888	19178	0	7.4899	0.0072261	0.023257	0.991255	523	3	7.4899
Otud1	4	0.81067	0.82319	0.992919	15797	0	6.5031	0.0072294	0.033013	0.991255	524	3	6.5031
Dexi	4	0.99274	0.98645	0.996888	19191	0	2.8174	0.0072638	0.033347	0.991255	525	4	2.8174
Tspyl2	4	0.96985	0.96216	0.992919	18766	0	4.4402	0.0072895	0.033347	0.991255	526	4	4.4402
Pfn3	4	0.96764	0.96145	0.992919	18742	0	6.0595	0.0072946	0.033347	0.991255	527	4	6.0595
Tpsg1	4	0.99268	0.98645	0.996888	19190	0	2.6859	0.0073223	0.033347	0.991255	528	4	2.6859
Zfp750	4	0.1475	0.29346	0.992919	4883	1	4.9976	0.0073231	0.033347	0.991255	529	3	4.9976
Olfr353	3	0.30267	0.41264	0.992919	8119	1	2.5972	0.0074156	0.024102	0.991255	530	2	2.5972
Col19a1	4	0.3835	0.53831	0.992919	9483	1	0.76769	0.0074342	0.03351	0.991255	531	2	0.76769
Fam134b	4	0.99254	0.98645	0.996888	19189	0	1.7217	0.0074602	0.033511	0.991255	532	4	1.7217
Cldn14	4	0.99254	0.98645	0.996888	19188	0	4.1318	0.0074617	0.033511	0.991255	533	4	4.1318
Sdc4	3	0.99253	0.98711	0.996888	19187	0	4.7908	0.007475	0.024411	0.991255	534	3	4.7908
Bloc1s1	3	0.9751	0.96038	0.992919	18854	0	7.5489	0.0075028	0.024411	0.991255	535	3	7.5489
Pkn1	4	0.96876	0.9618	0.992919	18755	0	4.0871	0.007508	0.033511	0.991255	536	4	4.0871
Pmepa1	4	0.99247	0.98645	0.996888	19185	0	3.8221	0.0075349	0.03369	0.991255	537	4	3.8221
Zfp770	3	0.7588	0.76869	0.992919	14808	0	6.0631	0.0075406	0.024411	0.991255	538	2	6.0631
Gm156	4	0.89377	0.90056	0.992919	17395	0	4.7662	0.0075452	0.033837	0.991255	539	3	4.7662
Olfr630	4	0.63357	0.69468	0.992919	12711	1	5.9163	0.0075495	0.033837	0.991255	540	3	5.9163
Pxn	4	0.76258	0.77759	0.992919	14874	1	5.4981	0.0075949	0.034184	0.991255	541	3	5.4981
Sohlh1	4	0.17517	0.34006	0.992919	5482	2	-0.63837	0.0076007	0.034184	0.991255	542	1	-0.63837
Agrn	4	0.99237	0.98629	0.996888	19183	0	4.4969	0.0076347	0.034184	0.991255	543	4	4.4969
Olfr1316	4	0.99235	0.98629	0.996888	19182	0	4.4652	0.0076534	0.034184	0.991255	544	4	4.4652
Otulin	4	0.032617	0.11306	0.992919	1525	2	-0.99077	0.0076563	0.034184	0.991255	545	1	-0.99077
Itga7	4	0.36158	0.52624	0.992919	9275	2	3.5732	0.0076724	0.034184	0.991255	546	2	3.5732
Epha7	4	0.92421	0.93088	0.992919	17971	0	6.4676	0.0076791	0.034184	0.991255	547	3	6.4676
Brd9	3	0.94518	0.93166	0.992919	18337	0	7.5225	0.0076817	0.024885	0.991255	548	3	7.5225
Sdf2l1	4	0.988	0.9814	0.995623	19104	0	5.4963	0.0076863	0.034361	0.991255	549	4	5.4963
4932411N23Rik	4	0.75893	0.77492	0.992919	14812	1	3.9945	0.0077118	0.034361	0.991255	550	3	3.9945
Krtap19-2	4	0.54648	0.63184	0.992919	11406	1	5.6497	0.0077299	0.034361	0.991255	551	3	5.6497
Sh2d7	4	0.17293	0.33525	0.992919	5444	1	4.127	0.0077673	0.034361	0.991255	552	3	4.127
Mfsd9	4	0.99222	0.98629	0.996888	19181	0	3.4798	0.0077843	0.034361	0.991255	553	4	3.4798
Epn3	4	0.95179	0.95159	0.992919	18472	0	5.1649	0.0077983	0.034499	0.991255	554	4	5.1649
Wnt16	4	0.98761	0.98118	0.995623	19097	0	5.5134	0.0078174	0.034499	0.991255	555	4	5.5134
Cep95	4	0.34908	0.51729	0.992919	9024	2	3.7179	0.0078327	0.0345	0.991255	556	2	3.7179
Timp1	4	0.99217	0.98612	0.996888	19180	0	4.1172	0.0078342	0.0345	0.991255	557	4	4.1172
S100a2	4	0.013971	0.064053	0.992919	749	2	0.31741	0.0078783	0.034687	0.991255	558	2	0.31741
Acp6	4	0.96048	0.95733	0.992919	18633	0	5.8675	0.0078786	0.034687	0.991255	559	4	5.8675
Scn1a	4	0.9266	0.93359	0.992919	18027	0	4.9024	0.0080179	0.034994	0.991255	560	3	4.9024
Ido1	4	0.9615	0.95848	0.992919	18654	0	3.9852	0.0080449	0.034994	0.991255	561	4	3.9852
Gm20815	4	0.093449	0.22518	0.992919	3624	1	4.8804	0.0080704	0.034994	0.991255	562	3	4.8804
Ube2u	4	0.99191	0.98597	0.996888	19177	0	1.9384	0.0080857	0.034994	0.991255	563	4	1.9384
Dhcr24	4	0.97623	0.96784	0.993465	18869	0	5.8876	0.0081288	0.035192	0.991255	564	4	5.8876
Olfr522	4	0.75637	0.77294	0.992919	14763	1	5.3734	0.0081388	0.035192	0.991255	565	3	5.3734
Xylt1	3	0.79842	0.801	0.992919	15574	0	6.62	0.0081423	0.02671	0.991255	566	2	6.62
Olfr677	4	0.59853	0.66795	0.992919	12140	1	1.2674	0.0081559	0.035192	0.991255	567	3	1.2674
Eif3f	2	0.99181	0.98706	0.996888	19176	0	6.5074	0.0081877	0.020246	0.991255	568	2	6.5074
Snx1	4	0.99181	0.98597	0.996888	19175	0	4.1752	0.0081886	0.035193	0.991255	569	4	4.1752
Acadvl	3	0.88866	0.89322	0.992919	17301	0	6.0696	0.0082072	0.02671	0.991255	570	3	6.0696
Fbxl17	4	0.31727	0.49057	0.992919	8396	1	-0.5083	0.0082114	0.03538	0.991255	571	1	-0.5083
Zscan4d	4	0.99174	0.98597	0.996888	19174	0	4.1152	0.0082587	0.03538	0.991255	572	4	4.1152
Shroom2	4	0.99172	0.98597	0.996888	19173	0	3.2771	0.0082771	0.03538	0.991255	573	4	3.2771
Mical3	4	0.16437	0.32381	0.992919	5266	2	3.3747	0.0083114	0.03538	0.991255	574	2	3.3747
Ankrd13a	4	0.91582	0.92632	0.992919	17796	0	1.4571	0.0083224	0.03538	0.991255	575	3	1.4571
Scn3b	3	0.99168	0.98591	0.996888	19172	0	3.8984	0.0083234	0.02671	0.991255	576	3	3.8984
Tjp1	4	0.99167	0.98597	0.996888	19171	0	4.1823	0.0083293	0.03538	0.991255	577	4	4.1823
Nfatc2ip	4	0.012642	0.053397	0.992919	695	2	-2.9024	0.0083778	0.03538	0.991255	578	1	-2.9024
Mptx2	4	0.99157	0.98597	0.996888	19169	0	3.912	0.0084298	0.035738	0.991255	579	4	3.912
Rgs13	3	0.85654	0.86668	0.992919	16726	0	7.8864	0.0084308	0.02701	0.991255	580	2	7.8864
Tlr13	4	0.52696	0.61708	0.992919	11131	1	2.1178	0.0084333	0.035738	0.991255	581	2	2.1178
Cyp4v3	4	0.50844	0.60119	0.992919	10882	1	5.3285	0.0084531	0.035738	0.991255	582	3	5.3285
Mss51	4	0.6621	0.71077	0.992919	13158	1	6.1742	0.0084865	0.035738	0.991255	583	3	6.1742
Ano6	4	0.075917	0.19432	0.992919	3057	1	2.9528	0.0084888	0.035878	0.991255	584	2	2.9528
Trap1a	4	0.96876	0.9618	0.992919	18753	0	6.2502	0.008502	0.035878	0.991255	585	4	6.2502
Deptor	4	0.89521	0.90127	0.992919	17404	0	4.8666	0.0085077	0.035878	0.991255	586	3	4.8666
Cdk10	4	0.69353	0.72957	0.992919	13672	1	5.8159	0.0085123	0.035878	0.991255	587	3	5.8159
Tas2r144	4	0.32378	0.49529	0.992919	8534	2	0.63439	0.0085443	0.035878	0.991255	588	2	0.63439
Man2c1	4	0.81187	0.82431	0.992919	15825	0	6.2801	0.0085898	0.035878	0.991255	589	3	6.2801
Mettl9	4	0.17797	0.34478	0.992919	5547	1	3.7518	0.0085917	0.035878	0.991255	590	2	3.7518
Junb	4	0.95982	0.95692	0.992919	18620	0	2.2709	0.0085998	0.035878	0.991255	591	4	2.2709
Cd82	4	0.5093	0.60119	0.992919	10892	1	5.975	0.008647	0.035878	0.991255	592	3	5.975
Fyn	4	0.99133	0.98581	0.996888	19166	0	2.5478	0.0086732	0.03607	0.991255	593	4	2.5478
Nagpa	4	0.71386	0.73891	0.992919	13975	1	5.5743	0.008707	0.036268	0.991255	594	3	5.5743
Kif18a	4	0.17747	0.34289	0.992919	5536	2	-0.13358	0.0087662	0.036956	0.991255	595	2	-0.13358
Taf7l	4	0.97073	0.96286	0.992919	18781	0	6.3471	0.0088014	0.037105	0.991255	596	4	6.3471
Olfr619	4	0.83853	0.84783	0.992919	16372	0	6.7108	0.0088542	0.037105	0.991255	597	3	6.7108
1700023E05Rik	3	0.99114	0.98553	0.996888	19165	0	6.3648	0.0088556	0.028338	0.991255	598	3	6.3648
Zfp382	3	0.99114	0.98553	0.996888	19164	0	4.6767	0.0088627	0.028338	0.991255	599	3	4.6767
Sgsm3	4	0.37565	0.53301	0.992919	9416	1	-0.38044	0.0088772	0.037105	0.991255	600	2	-0.38044
Prss45	3	0.16692	0.30909	0.992919	5328	1	0.91543	0.0089152	0.028825	0.991255	601	2	0.91543
Rerg	3	0.32749	0.43185	0.992919	8607	1	6.8229	0.008921	0.028825	0.991255	602	2	6.8229
Wdr53	4	0.66158	0.70945	0.992919	13147	1	1.4903	0.0089326	0.037106	0.991255	603	3	1.4903
Bpifb4	4	0.62059	0.68938	0.992919	12510	1	5.8057	0.008955	0.037106	0.991255	604	3	5.8057
Zscan4c	2	0.88988	0.86352	0.992919	17329	0	6.6328	0.0089565	0.022157	0.991255	605	2	6.6328
Hist1h4j	2	0.94134	0.9125	0.992919	18264	0	7.5312	0.0089843	0.022157	0.991255	606	2	7.5312
Adamtsl3	4	0.00097689	0.0081231	0.992919	67	2	-1.2079	0.0089881	0.037106	0.991255	607	2	-1.2079
H13	4	0.92872	0.93732	0.992919	18050	0	6.203	0.0090056	0.037106	0.991255	608	3	6.203
Gadd45b	4	0.93645	0.9409	0.992919	18177	0	5.3284	0.0090217	0.037106	0.991255	609	3	5.3284
Rhox2g	4	0.99097	0.985	0.996888	19162	0	3.8949	0.0090326	0.037347	0.991255	610	4	3.8949
Pltp	4	0.99097	0.985	0.996888	19163	0	6.5135	0.0090326	0.037347	0.991255	611	4	6.5135
Nme1	4	0.8232	0.83408	0.992919	16061	0	2.9972	0.0090436	0.037945	0.991255	612	2	2.9972
Wfdc15a	3	0.99094	0.98518	0.996888	19161	0	6.1226	0.0090597	0.029318	0.991255	613	3	6.1226
Ssxb1	4	0.47686	0.58252	0.992919	10525	1	0.81174	0.009099	0.038314	0.991255	614	3	0.81174
Tmem97	4	0.98852	0.98261	0.996058	19123	0	5.4856	0.0091183	0.038315	0.991255	615	4	5.4856
Fis1	4	0.63453	0.69604	0.992919	12733	1	4.7039	0.0091532	0.038315	0.991255	616	3	4.7039
Uba1y	4	0.95759	0.95577	0.992919	18581	0	4.2581	0.0091545	0.038315	0.991255	617	4	4.2581
Cdyl	4	0.97888	0.97108	0.994432	18924	0	5.1827	0.0091641	0.038315	0.991255	618	4	5.1827
Cd3e	4	0.63453	0.69604	0.992919	12726	1	5.6871	0.0091966	0.038706	0.991255	619	3	5.6871
Atpaf2	2	0.44053	0.47149	0.992919	10115	1	5.462	0.0092067	0.022655	0.991255	620	1	5.462
Coa3	3	0.36256	0.45221	0.992919	9283	1	7.2439	0.0092134	0.029969	0.991255	621	2	7.2439
Abcb5	4	0.90629	0.91313	0.992919	17597	0	5.8657	0.0092588	0.038924	0.991255	622	3	5.8657
Odf3l1	4	0.23681	0.41823	0.992919	6829	1	4.2772	0.009265	0.038924	0.991255	623	3	4.2772
Cystm1	4	0.019154	0.079267	0.992919	986	2	-0.90155	0.0092654	0.038924	0.991255	624	2	-0.90155
Kbtbd8	4	0.34402	0.51612	0.992919	8925	1	5.4579	0.0092753	0.038924	0.991255	625	3	5.4579
Dnajc5	3	0.61243	0.63696	0.992919	12393	1	7.3319	0.0092939	0.030157	0.991255	626	2	7.3319
Vmn1r101	3	0.9907	0.98426	0.996671	19160	0	4.0109	0.0093021	0.030157	0.991255	627	3	4.0109
Ccr1	4	0.99069	0.98472	0.996888	19159	0	2.8575	0.009309	0.038924	0.991255	628	4	2.8575
Slc25a25	4	0.99062	0.98462	0.996856	19158	0	3.535	0.0093761	0.039003	0.991255	629	4	3.535
Pdgfrb	4	0.714	0.73891	0.992919	13977	1	6.2385	0.0093763	0.039081	0.991255	630	3	6.2385
Tas2r116	3	0.076749	0.16334	0.992919	3082	1	7.0788	0.0093838	0.033104	0.991255	631	2	7.0788
Trpm2	4	0.87481	0.87497	0.992919	17056	0	5.6904	0.0093983	0.039081	0.991255	632	3	5.6904
Mrpl51	4	0.17254	0.33433	0.992919	5437	1	3.9009	0.0094088	0.039082	0.991255	633	2	3.9009
Hnrnpc	3	0.63068	0.65215	0.992919	12657	1	-0.27422	0.0094147	0.033274	0.991255	634	1	-0.27422
Olfr632	4	0.99058	0.98453	0.996813	19157	0	3.4254	0.0094191	0.039082	0.991255	635	4	3.4254
Nup188	4	0.22236	0.40274	0.992919	6533	2	0.6519	0.0094318	0.039082	0.991255	636	2	0.6519
Rap2c	4	0.99054	0.98434	0.996671	19156	0	5.6148	0.0094605	0.039251	0.991255	637	4	5.6148
Morn4	4	0.12882	0.27277	0.992919	4433	1	5.1831	0.0094843	0.039251	0.991255	638	3	5.1831
Tyro3	4	0.29601	0.47551	0.992919	7981	1	0.66549	0.0094872	0.039251	0.991255	639	2	0.66549
Uox	4	0.99051	0.98434	0.996671	19155	0	3.8714	0.0094876	0.039251	0.991255	640	4	3.8714
Trim40	3	0.16551	0.30661	0.992919	5293	1	0.95359	0.0095395	0.033647	0.991255	641	2	0.95359
Alox8	4	0.44769	0.57179	0.992919	10192	1	5.6436	0.0095418	0.039742	0.991255	642	3	5.6436
Stfa2	3	0.45613	0.52852	0.992919	10293	1	6.1784	0.0095811	0.034322	0.991255	643	2	6.1784
Sparc	4	0.64423	0.69868	0.992919	12887	1	5.7842	0.009589	0.039742	0.991255	644	3	5.7842
Vmn2r14	3	0.99038	0.98327	0.996318	19154	0	5.5636	0.0096205	0.034323	0.991255	645	3	5.5636
Rbbp8	4	0.30219	0.47656	0.992919	8112	2	3.0059	0.0096535	0.039742	0.991255	646	2	3.0059
Arhgef12	4	0.97121	0.96321	0.992919	18791	0	5.0193	0.0096726	0.039742	0.991255	647	4	5.0193
Armcx4	4	0.55659	0.64248	0.992919	11549	1	5.432	0.0096782	0.039742	0.991255	648	3	5.432
Bcl11b	4	0.29974	0.47656	0.992919	8056	2	-0.97283	0.009709	0.039742	0.991255	649	2	-0.97283
Aldh18a1	4	0.019485	0.081355	0.992919	998	1	4.6222	0.0097123	0.039742	0.991255	650	3	4.6222
Zbtb39	4	0.99027	0.98398	0.996464	19153	0	2.0469	0.0097267	0.039742	0.991255	651	4	2.0469
Trmt13	4	0.80989	0.82265	0.992919	15786	0	1.6301	0.0097644	0.040312	0.991255	652	3	1.6301
Olfr117	4	0.55979	0.64248	0.992919	11592	1	5.1547	0.0097877	0.040312	0.991255	653	3	5.1547
Zfp101	4	0.1374	0.28636	0.992919	4642	1	5.9438	0.00983	0.040312	0.991255	654	3	5.9438
Zscan10	4	0.99014	0.98398	0.996464	19152	0	3.8466	0.0098649	0.040312	0.991255	655	4	3.8466
Gm14085	4	0.99008	0.98398	0.996464	19151	0	4.2573	0.0099166	0.040508	0.991255	656	4	4.2573
Litaf	3	0.99008	0.98201	0.995875	19150	0	3.9144	0.009923	0.038066	0.991255	657	3	3.9144
Mpc2	4	0.72112	0.74291	0.992919	14105	1	1.345	0.0099307	0.040508	0.991255	658	3	1.345
Xkr5	4	0.99007	0.98398	0.996464	19149	0	3.1181	0.0099324	0.040508	0.991255	659	4	3.1181
Ssr4	4	0.99005	0.98398	0.996464	19148	0	5.2817	0.0099473	0.040508	0.991255	660	4	5.2817
Hddc2	4	0.88237	0.88387	0.992919	17184	0	3.4062	0.0099686	0.040508	0.991255	661	3	3.4062
Elfn1	4	0.97071	0.96286	0.992919	18780	0	5.711	0.0099691	0.040508	0.991255	662	4	5.711
Cyp2j6	4	0.29582	0.47442	0.992919	7975	2	1.8768	0.0099861	0.040903	0.991255	663	2	1.8768
Ppfibp1	3	0.82556	0.83505	0.992919	16121	0	0.43185	0.0099972	0.038066	0.991255	664	1	0.43185
Pnlip	4	0.98999	0.98398	0.996464	19147	0	1.4973	0.010007	0.040903	0.991255	665	4	1.4973
Crlf1	4	0.8762	0.87843	0.992919	17076	0	4.4723	0.010033	0.040904	0.991255	666	3	4.4723
Xkr4	3	0.83694	0.85057	0.992919	16340	0	1.044	0.010039	0.038066	0.991255	667	2	1.044
Vmn2r58	4	0.92007	0.9292	0.992919	17883	0	5.6365	0.010072	0.040904	0.991255	668	3	5.6365
Gm7325	4	0.66175	0.70945	0.992919	13151	1	1.9234	0.010097	0.041062	0.991255	669	2	1.9234
Ephb2	4	0.94036	0.94433	0.992919	18249	0	3.6615	0.010104	0.041062	0.991255	670	3	3.6615
Txndc11	3	0.3195	0.42594	0.992919	8447	1	7.3134	0.010127	0.03825	0.991255	671	2	7.3134
Slc35a2	4	0.98987	0.98361	0.996401	19146	0	1.7976	0.010133	0.041214	0.991255	672	4	1.7976
Olfr769	4	0.86981	0.87058	0.992919	16965	0	5.4025	0.010147	0.041214	0.991255	673	3	5.4025
Hlx	3	0.98985	0.98181	0.995728	19145	0	3.8267	0.010151	0.03825	0.991255	674	3	3.8267
Ppm1e	4	0.41478	0.55704	0.992919	9824	1	3.5355	0.010152	0.041214	0.991255	675	2	3.5355
Gnb1l	2	0.98983	0.98354	0.996401	19144	0	7.1688	0.010167	0.023651	0.991255	676	2	7.1688
Vmn1r148	2	0.84163	0.81678	0.992919	16428	0	6.0398	0.010179	0.023651	0.991255	677	2	6.0398
Olfm4	4	0.9898	0.98361	0.996401	19143	0	2.9179	0.010198	0.041406	0.991255	678	4	2.9179
Cd226	4	0.9898	0.98361	0.996401	19142	0	4.2345	0.010198	0.041406	0.991255	679	4	4.2345
Ccdc13	4	0.67477	0.71884	0.992919	13352	1	3.4708	0.010208	0.041406	0.991255	680	3	3.4708
Sprr3	4	0.10769	0.24451	0.992919	3945	2	3.4417	0.010241	0.041406	0.991255	681	2	3.4417
Olfr1024	4	0.86998	0.87058	0.992919	16967	0	6.1147	0.010263	0.041406	0.991255	682	3	6.1147
Kcna4	4	0.82291	0.83408	0.992919	16055	0	5.7555	0.010265	0.041406	0.991255	683	3	5.7555
Tnfrsf25	4	0.92617	0.93359	0.992919	18020	0	6.0004	0.010274	0.041406	0.991255	684	3	6.0004
Brs3	4	0.91843	0.92865	0.992919	17839	0	3.874	0.010287	0.041406	0.991255	685	3	3.874
Aldob	4	0.65146	0.70337	0.992919	12998	1	6.0733	0.010289	0.041406	0.991255	686	3	6.0733
Mib1	4	0.12347	0.26166	0.992919	4321	1	2.477	0.010319	0.041406	0.991255	687	3	2.477
Csf1	4	0.46234	0.57847	0.992919	10366	1	4.0282	0.010346	0.041573	0.991255	688	3	4.0282
Egfem1	4	0.14032	0.2901	0.992919	4709	1	3.9377	0.010372	0.041573	0.991255	689	3	3.9377
Mlph	4	0.88169	0.88261	0.992919	17174	0	5.7864	0.010391	0.041574	0.991255	690	3	5.7864
Gpld1	4	0.93634	0.9409	0.992919	18176	0	4.6267	0.010392	0.041574	0.991255	691	3	4.6267
Mark2	4	0.75414	0.77227	0.992919	14739	1	0.19495	0.010429	0.041749	0.991255	692	2	0.19495
Lmbrd1	3	0.98957	0.98138	0.995623	19139	0	4.559	0.010432	0.038957	0.991255	693	3	4.559
Gbgt1	4	0.98689	0.98053	0.995623	19087	0	5.2866	0.010444	0.041749	0.991255	694	4	5.2866
Cyp1b1	4	0.98955	0.98321	0.996312	19138	0	4.8543	0.010445	0.04175	0.991255	695	4	4.8543
Bnc2	4	0.98868	0.98281	0.996058	19129	0	4.9041	0.010458	0.04175	0.991255	696	4	4.9041
Tmem33	4	0.04039	0.12302	0.992919	1806	1	0.61925	0.010485	0.041939	0.991255	697	2	0.61925
Col1a1	4	0.30481	0.47762	0.992919	8157	2	3.5164	0.010504	0.041939	0.991255	698	2	3.5164
Mut	4	0.31302	0.49057	0.992919	8306	1	5.6153	0.010529	0.041939	0.991255	699	3	5.6153
Stk19	4	0.97492	0.96639	0.993276	18850	0	3.8296	0.01054	0.041939	0.991255	700	4	3.8296
Cldn3	4	0.657	0.70674	0.992919	13084	1	5.9591	0.010579	0.041939	0.991255	701	3	5.9591
9130401M01Rik	4	0.16708	0.32673	0.992919	5331	2	1.5918	0.010596	0.041939	0.991255	702	2	1.5918
Unc5cl	4	0.077942	0.1997	0.992919	3120	1	4.7714	0.010597	0.041939	0.991255	703	3	4.7714
Zfp109	4	0.98902	0.98281	0.996058	19135	0	5.4708	0.010636	0.042502	0.991255	704	4	5.4708
1700019L03Rik	4	0.98478	0.97709	0.994738	19046	0	6.1987	0.01065	0.042502	0.991255	705	4	6.1987
Aldh1a7	4	0.20931	0.39189	0.992919	6248	1	5.059	0.010651	0.042502	0.991255	706	3	5.059
Phykpl	4	0.39281	0.54633	0.992919	9584	1	0.014613	0.010706	0.042502	0.991255	707	1	0.014613
Pgd	4	0.93484	0.93991	0.992919	18144	0	5.7091	0.010762	0.042502	0.991255	708	3	5.7091
Arhgef6	4	0.87169	0.87364	0.992919	17009	0	5.2209	0.010779	0.042502	0.991255	709	3	5.2209
Rnf31	4	0.98083	0.9734	0.994432	18956	0	6.5076	0.010815	0.042502	0.991255	710	4	6.5076
Mup3	4	0.74565	0.76283	0.992919	14587	1	1.5996	0.010817	0.042502	0.991255	711	3	1.5996
Tarbp2	4	0.85213	0.8586	0.992919	16641	0	5.641	0.010818	0.042502	0.991255	712	3	5.641
Man2b2	4	0.98918	0.98301	0.996161	19137	0	4.9109	0.010824	0.042502	0.991255	713	4	4.9109
Usp44	4	0.98914	0.98301	0.996161	19136	0	2.4831	0.010862	0.042916	0.991255	714	4	2.4831
Tsen2	3	0.74192	0.75378	0.992919	14506	0	0.19867	0.010871	0.039768	0.991255	715	1	0.19867
Bag1	4	0.8231	0.83408	0.992919	16058	0	3.7688	0.010873	0.042916	0.991255	716	3	3.7688
Olfr937	4	0.61519	0.68532	0.992919	12429	1	5.7275	0.010944	0.042916	0.991255	717	3	5.7275
Fbxo31	4	0.77642	0.78742	0.992919	15141	0	5.5746	0.010944	0.042916	0.991255	718	3	5.5746
Gabpb1	3	0.75794	0.76633	0.992919	14793	0	1.382	0.010954	0.040167	0.991255	719	2	1.382
Smim19	4	0.42964	0.56106	0.992919	9987	1	4.538	0.010978	0.043286	0.991255	720	3	4.538
Nfam1	4	0.28895	0.4678	0.992919	7831	2	-0.40831	0.010983	0.043286	0.991255	721	1	-0.40831
4933427D06Rik	4	0.78464	0.7932	0.992919	15308	0	5.7124	0.010987	0.043287	0.991255	722	3	5.7124
Jdp2	4	0.68721	0.72694	0.992919	13546	1	0.62486	0.011039	0.043502	0.991255	723	2	0.62486
Unc45a	3	0.30632	0.41859	0.992919	8173	1	1.3506	0.011078	0.040688	0.991255	724	2	1.3506
Laptm4a	4	0.97904	0.97168	0.994432	18927	0	4.5926	0.011079	0.043502	0.991255	725	4	4.5926
Cxxc4	3	0.051226	0.11852	0.992919	2205	2	-1.2524	0.01112	0.040688	0.991255	726	1	-1.2524
Slc25a13	4	0.39681	0.54772	0.992919	9635	1	1.2711	0.01115	0.043899	0.991255	727	2	1.2711
Gab3	3	0.98885	0.97981	0.995623	19134	0	3.8451	0.011152	0.040689	0.991255	728	3	3.8451
Pqbp1	4	0.98281	0.97502	0.994432	18995	0	6.1034	0.011163	0.043899	0.991255	729	4	6.1034
Cdca7	4	0.16383	0.32291	0.992919	5250	1	3.8458	0.011168	0.043899	0.991255	730	3	3.8458
St3gal5	4	0.20496	0.3881	0.992919	6147	2	-0.42144	0.011205	0.044094	0.991255	731	1	-0.42144
Sstr1	4	0.75637	0.77294	0.992919	14777	1	2.341	0.01126	0.044094	0.991255	732	3	2.341
C1ra	4	0.046332	0.13276	0.992919	2036	1	3.1639	0.011263	0.044094	0.991255	733	2	3.1639
Zc3h13	3	0.98872	0.97958	0.995623	19132	0	4.3796	0.011278	0.041249	0.991255	734	3	4.3796
1700113H08Rik	3	0.98871	0.97936	0.995623	19131	0	4.5072	0.011289	0.041455	0.991255	735	3	4.5072
Rras2	4	0.98869	0.98281	0.996058	19130	0	3.4019	0.011314	0.044094	0.991255	736	4	3.4019
Prrx1	4	0.75213	0.77159	0.992919	14705	1	-0.9094	0.011316	0.044094	0.991255	737	1	-0.9094
Atf2	4	0.98867	0.98281	0.996058	19128	0	3.0134	0.011332	0.044094	0.991255	738	4	3.0134
Mtcp1	4	0.98865	0.98281	0.996058	19127	0	4.9418	0.011353	0.044532	0.991255	739	4	4.9418
Avp	4	0.70569	0.73358	0.992919	13847	1	3.9165	0.011371	0.044533	0.991255	740	3	3.9165
A430005L14Rik	4	0.98862	0.98281	0.996058	19125	0	4.0511	0.011378	0.044533	0.991255	741	4	4.0511
Olfr424	4	0.83206	0.84368	0.992919	16255	0	6.7609	0.011379	0.044533	0.991255	742	3	6.7609
Zfp715	4	0.1793	0.35052	0.992919	5566	1	6.1332	0.011434	0.044752	0.991255	743	3	6.1332
Proca1	3	0.98853	0.97935	0.995623	19124	0	4.0278	0.011471	0.041785	0.991255	744	3	4.0278
Hs3st3b1	4	0.98852	0.98261	0.996058	19122	0	3.7672	0.011484	0.044924	0.991255	745	4	3.7672
Ap4s1	3	0.25365	0.38468	0.992919	7126	1	7.2142	0.0115	0.041786	0.991255	746	2	7.2142
Mtmr4	4	0.98848	0.98261	0.996058	19121	0	5.0974	0.011525	0.045322	0.991255	747	4	5.0974
Fgf10	4	0.86906	0.87014	0.992919	16948	0	0.72229	0.011537	0.045322	0.991255	748	2	0.72229
Gpi1	4	0.98842	0.98242	0.996058	19120	0	1.7024	0.01158	0.045487	0.991255	749	4	1.7024
Mdh1b	4	0.91871	0.92865	0.992919	17845	0	0.8914	0.011592	0.045488	0.991255	750	3	0.8914
Ccdc50	4	0.9884	0.98222	0.996038	19119	0	3.801	0.0116	0.045651	0.991255	751	4	3.801
Olfr102	4	0.91559	0.92632	0.992919	17790	0	3.9608	0.011641	0.045996	0.991255	752	3	3.9608
Pcolce2	4	0.081615	0.20354	0.992919	3257	1	1.8443	0.011648	0.045996	0.991255	753	3	1.8443
Rnf24	4	0.97649	0.96816	0.993465	18876	0	5.7213	0.011667	0.045996	0.991255	754	4	5.7213
Mybph	4	0.98833	0.98181	0.995728	19118	0	1.6375	0.011673	0.045996	0.991255	755	4	1.6375
Pou3f2	4	0.98831	0.98181	0.995728	19117	0	3.428	0.011689	0.045996	0.991255	756	4	3.428
Hnf4a	4	0.79396	0.81165	0.992919	15487	0	0.72452	0.011703	0.045996	0.991255	757	2	0.72452
Zfp784	4	0.9883	0.98181	0.995728	19116	0	1.7693	0.011705	0.045996	0.991255	758	4	1.7693
Spink8	4	0.98827	0.98181	0.995728	19115	0	4.3	0.011729	0.045996	0.991255	759	4	4.3
Nmral1	4	0.98825	0.98161	0.995728	19114	0	4.151	0.011746	0.046164	0.991255	760	4	4.151
Tex26	4	0.055727	0.15008	0.992919	2374	2	-1.2558	0.011758	0.046165	0.991255	761	2	-1.2558
Cbll1	3	0.98822	0.97861	0.995623	19113	0	6.3382	0.011785	0.042793	0.991255	762	3	6.3382
Adipor2	3	0.098574	0.2051	0.992919	3740	1	-1.0063	0.011785	0.042793	0.991255	763	1	-1.0063
Scp2	4	0.98819	0.9814	0.995623	19112	0	2.9289	0.011812	0.046348	0.991255	764	4	2.9289
Susd5	4	0.59264	0.66388	0.992919	12049	1	2.5841	0.011814	0.046348	0.991255	765	2	2.5841
Prkag3	4	0.25886	0.43581	0.992919	7248	2	3.4383	0.011815	0.046348	0.991255	766	2	3.4383
Tuba4a	4	0.9836	0.97581	0.994432	19012	0	4.9294	0.011831	0.046348	0.991255	767	4	4.9294
Cul5	4	0.33368	0.50653	0.992919	8721	1	4.4847	0.011841	0.046348	0.991255	768	3	4.4847
Raver1	4	0.11713	0.25779	0.992919	4154	2	2.2253	0.01185	0.046348	0.991255	769	2	2.2253
Tpm3	4	0.98814	0.9814	0.995623	19111	0	3.4579	0.011858	0.046348	0.991255	770	4	3.4579
Fam171a2	2	0.86894	0.84214	0.992919	16945	0	6.4323	0.011873	0.029076	0.991255	771	2	6.4323
Tex30	3	0.97241	0.95929	0.992919	18806	0	7.5393	0.011875	0.043235	0.991255	772	3	7.5393
Slc9a4	4	0.98812	0.9814	0.995623	19110	0	2.4057	0.011878	0.046348	0.991255	773	4	2.4057
Stk26	4	0.71359	0.73891	0.992919	13969	1	4.1599	0.011899	0.046348	0.991255	774	3	4.1599
Mtmr7	4	0.98809	0.9814	0.995623	19109	0	2.9698	0.011913	0.046348	0.991255	775	4	2.9698
Bex6	4	0.17527	0.34006	0.992919	5485	2	-0.50955	0.011925	0.046348	0.991255	776	1	-0.50955
Cd101	4	0.78166	0.7932	0.992919	15248	0	3.895	0.011927	0.046348	0.991255	777	2	3.895
Fndc3c1	4	0.98805	0.9814	0.995623	19108	0	3.3959	0.011948	0.046348	0.991255	778	4	3.3959
Cntd1	4	0.98803	0.9814	0.995623	19107	0	3.8459	0.011971	0.046348	0.991255	779	4	3.8459
Ntan1	4	0.98802	0.9814	0.995623	19106	0	2.9434	0.011979	0.046348	0.991255	780	4	2.9434
4933412E24Rik	4	0.80453	0.81977	0.992919	15691	0	3.9132	0.011984	0.046348	0.991255	781	3	3.9132
Flcn	3	0.98801	0.9779	0.995398	19105	0	4.631	0.011988	0.043792	0.991255	782	3	4.631
Cenpt	2	0.050892	0.10903	0.992919	2193	1	5.0637	0.012012	0.029076	0.991255	783	1	5.0637
Csnk1g3	4	0.12693	0.26823	0.992919	4387	1	1.2574	0.012035	0.046348	0.991255	784	3	1.2574
Rhpn2	4	0.98794	0.9814	0.995623	19103	0	3.9266	0.012064	0.046348	0.991255	785	4	3.9266
Tusc1	4	0.98793	0.9814	0.995623	19102	0	2.4654	0.012067	0.046348	0.991255	786	4	2.4654
Ago3	4	0.77895	0.78936	0.992919	15196	0	3.6902	0.012082	0.046348	0.991255	787	2	3.6902
Hs3st1	4	0.62844	0.69341	0.992919	12620	1	3.0356	0.012089	0.046348	0.991255	788	2	3.0356
Dmbt1	4	0.82009	0.82764	0.992919	15999	0	2.3171	0.012091	0.046348	0.991255	789	2	2.3171
Fam20a	4	0.97195	0.96427	0.992919	18802	0	4.2009	0.012096	0.046348	0.991255	790	4	4.2009
Tm2d2	4	0.73758	0.75882	0.992919	14427	1	5.2022	0.012097	0.046348	0.991255	791	3	5.2022
Mrap	3	0.57492	0.61648	0.992919	11807	1	-0.86944	0.012117	0.046825	0.991255	792	1	-0.86944
Hr	4	0.89678	0.90309	0.992919	17432	0	5.9249	0.012129	0.046348	0.991255	793	3	5.9249
E130012A19Rik	4	0.92077	0.92976	0.992919	17900	0	1.3774	0.012146	0.046348	0.991255	794	3	1.3774
Ccdc96	4	0.98785	0.9814	0.995623	19101	0	5.6619	0.012148	0.046348	0.991255	795	4	5.6619
Maf	4	0.98785	0.9814	0.995623	19100	0	4.8949	0.012152	0.046348	0.991255	796	4	4.8949
Sav1	4	0.43855	0.56643	0.992919	10092	1	3.8991	0.012153	0.046348	0.991255	797	2	3.8991
Gm6121	3	0.98783	0.97765	0.995204	19099	0	2.658	0.012166	0.04717	0.991255	798	3	2.658
Cacna1d	3	0.22146	0.37454	0.992919	6519	1	7.1598	0.01219	0.04717	0.991255	799	2	7.1598
Irak1bp1	4	0.27851	0.46053	0.992919	7617	1	0.57568	0.012201	0.046761	0.991255	800	2	0.57568
Olfr582	4	0.1389	0.28923	0.992919	4674	1	6.0857	0.012207	0.046761	0.991255	801	3	6.0857
Cstb	4	0.057278	0.15384	0.992919	2428	1	3.5913	0.012217	0.046761	0.991255	802	3	3.5913
Prss12	4	0.24158	0.42133	0.992919	6903	1	2.1564	0.012257	0.046761	0.991255	803	3	2.1564
Pld1	4	0.97793	0.9705	0.994163	18901	0	5.1704	0.012308	0.047186	0.991255	804	4	5.1704
Olfr170	4	0.36189	0.52624	0.992919	9279	1	3.5509	0.012312	0.047186	0.991255	805	3	3.5509
Oosp2	4	0.48767	0.58784	0.992919	10654	1	5.5595	0.012317	0.047186	0.991255	806	3	5.5595
Lrrc38	4	0.98767	0.98118	0.995623	19098	0	2.6142	0.012331	0.047376	0.991255	807	4	2.6142
3110001I22Rik	4	0.11882	0.25931	0.992919	4198	2	-1.4915	0.012367	0.047377	0.991255	808	1	-1.4915
Aste1	4	0.44041	0.56781	0.992919	10114	1	5.7112	0.012465	0.051223	0.991255	809	3	5.7112
Igf2r	4	0.74647	0.76353	0.992919	14608	1	0.23927	0.012478	0.051223	0.991255	810	2	0.23927
Lgalsl	4	0.96431	0.96074	0.992919	18700	0	5.5076	0.012498	0.051431	0.991255	811	4	5.5076
A830018L16Rik	4	0.94892	0.95027	0.992919	18421	0	5.3112	0.012504	0.051431	0.991255	812	4	5.3112
Tas2r143	4	0.67669	0.72021	0.992919	13383	1	2.9896	0.012516	0.051431	0.991255	813	2	2.9896
4930505A04Rik	4	0.80353	0.81977	0.992919	15671	0	4.0073	0.012523	0.051431	0.991255	814	2	4.0073
Defb35	4	0.48831	0.58784	0.992919	10661	1	3.0629	0.012538	0.051431	0.991255	815	2	3.0629
Slamf9	4	0.9763	0.96784	0.993465	18872	0	5.0175	0.012593	0.051618	0.991255	816	4	5.0175
Ank2	4	0.98377	0.97609	0.994432	19017	0	6.1616	0.012646	0.051794	0.991255	817	4	6.1616
Ppp1r15b	3	0.86661	0.87926	0.992919	16894	0	7.2639	0.012653	0.047598	0.991255	818	2	7.2639
Trp53	4	0.98735	0.98076	0.995623	19096	0	1.7387	0.012654	0.051794	0.991255	819	4	1.7387
Rec114	4	0.94034	0.94433	0.992919	18248	0	5.0996	0.01266	0.051794	0.991255	820	3	5.0996
Zc4h2	4	0.67115	0.71616	0.992919	13288	1	3.5047	0.012696	0.052	0.991255	821	2	3.5047
Mfsd3	4	0.78912	0.79703	0.992919	15397	0	3.6686	0.012703	0.052	0.991255	822	2	3.6686
Mgat1	4	0.98726	0.98076	0.995623	19095	0	2.5944	0.012741	0.052001	0.991255	823	4	2.5944
Tmem168	4	0.98725	0.98076	0.995623	19094	0	4.0538	0.012746	0.052001	0.991255	824	4	4.0538
Tmem229a	3	0.61624	0.63839	0.992919	12443	1	1.0994	0.012782	0.04805	0.991255	825	2	1.0994
Olfr1447	4	0.98721	0.98076	0.995623	19093	0	3.7958	0.012785	0.05285	0.991255	826	4	3.7958
Cers6	4	0.98537	0.97876	0.995623	19060	0	4.5753	0.012797	0.052851	0.991255	827	4	4.5753
Ugt1a7c	4	0.80157	0.81977	0.992919	15641	0	0.8401	0.01281	0.052851	0.991255	828	3	0.8401
Zmynd15	4	0.90467	0.91249	0.992919	17564	0	4.1169	0.012819	0.053042	0.991255	829	2	4.1169
Inpp4a	4	0.98718	0.98053	0.995623	19092	0	3.7639	0.012824	0.053042	0.991255	830	4	3.7639
Tmx1	4	0.21972	0.40002	0.992919	6476	1	5.0409	0.012833	0.053042	0.991255	831	3	5.0409
Olfr1420	4	0.077723	0.1991	0.992919	3112	3	-0.69132	0.012865	0.053271	0.991255	832	1	-0.69132
Lrfn2	4	0.9871	0.98053	0.995623	19090	0	2.024	0.012898	0.053715	0.991255	833	4	2.024
Sdhaf4	4	0.78025	0.79193	0.992919	15215	0	2.6696	0.01295	0.053715	0.991255	834	2	2.6696
Gpr35	4	0.78771	0.79575	0.992919	15370	0	4.1998	0.012979	0.056963	0.991255	835	3	4.1998
Cdkn1b	4	0.98701	0.98053	0.995623	19089	0	2.7221	0.012986	0.056963	0.991255	836	4	2.7221
Kif16b	4	0.987	0.98053	0.995623	19088	0	2.2277	0.013	0.056963	0.991255	837	4	2.2277
Plxna4	4	0.5161	0.60786	0.992919	10989	1	4.6568	0.013001	0.056963	0.991255	838	3	4.6568
Ypel4	4	0.90496	0.91281	0.992919	17577	0	4.82	0.013015	0.056963	0.991255	839	3	4.82
Nphp3	4	0.31148	0.48801	0.992919	8277	1	3.2476	0.013031	0.056963	0.991255	840	3	3.2476
F7	4	0.48176	0.58385	0.992919	10576	1	4.7743	0.013045	0.056963	0.991255	841	3	4.7743
Olfr545	4	0.48944	0.59052	0.992919	10676	1	3.9437	0.013086	0.056964	0.991255	842	3	3.9437
Zkscan5	4	0.19482	0.37562	0.992919	5920	2	-0.092846	0.013141	0.057413	0.991255	843	2	-0.092846
Actl6b	4	0.98685	0.98053	0.995623	19086	0	3.3608	0.013152	0.057413	0.991255	844	4	3.3608
Zkscan3	4	0.070088	0.18041	0.992919	2875	1	3.7745	0.013177	0.057585	0.991255	845	2	3.7745
Tgtp2	4	0.96049	0.95733	0.992919	18634	0	4.1553	0.013197	0.057585	0.991255	846	4	4.1553
Dpep3	4	0.98675	0.98032	0.995623	19085	0	2.6005	0.013247	0.057585	0.991255	847	4	2.6005
Pld3	4	0.97678	0.96816	0.993465	18883	0	5.7934	0.013252	0.057585	0.991255	848	4	5.7934
Hgh1	4	0.85273	0.8586	0.992919	16651	0	1.4874	0.013252	0.057585	0.991255	849	3	1.4874
Mllt4	4	0.88575	0.88515	0.992919	17249	0	4.2796	0.013269	0.057585	0.991255	850	3	4.2796
Efna3	4	0.72728	0.74818	0.992919	14222	1	3.6208	0.013272	0.057585	0.991255	851	2	3.6208
Pabpc2	4	0.97968	0.97227	0.994432	18940	0	4.7803	0.013279	0.057586	0.991255	852	4	4.7803
Rhox10	4	0.025633	0.096571	0.992919	1242	1	4.1134	0.01328	0.057586	0.991255	853	3	4.1134
Gcnt4	4	0.48506	0.58518	0.992919	10624	1	5.8419	0.013341	0.057586	0.991255	854	3	5.8419
Rmi2	4	0.98666	0.98032	0.995623	19084	0	2.3183	0.013344	0.057586	0.991255	855	4	2.3183
Usp24	4	0.78176	0.7932	0.992919	15250	0	3.4584	0.013361	0.057586	0.991255	856	2	3.4584
Gm15056	4	0.79116	0.80445	0.992919	15435	0	4.1319	0.013368	0.057586	0.991255	857	2	4.1319
5430427O19Rik	4	0.98662	0.98011	0.995623	19083	0	2.8767	0.013384	0.058018	0.991255	858	4	2.8767
Chchd7	4	0.98661	0.98011	0.995623	19082	0	1.5876	0.013393	0.058019	0.991255	859	4	1.5876
Mreg	3	0.61902	0.63982	0.992919	12481	1	7.1238	0.013406	0.049347	0.991255	860	2	7.1238
Olfr916	4	0.29843	0.47656	0.992919	8029	1	1.1453	0.013418	0.058202	0.991255	861	2	1.1453
Zfp946	4	0.98657	0.97989	0.995623	19081	0	5.723	0.01343	0.058202	0.991255	862	4	5.723
Pdcl	4	0.98654	0.97989	0.995623	19080	0	2.7412	0.013461	0.058202	0.991255	863	4	2.7412
Il20ra	4	0.28409	0.46307	0.992919	7724	1	4.0663	0.013487	0.058202	0.991255	864	3	4.0663
Ear14	4	0.84288	0.84981	0.992919	16473	0	5.7153	0.01351	0.058202	0.991255	865	3	5.7153
Ccdc159	4	0.54853	0.63454	0.992919	11430	1	5.2728	0.01352	0.058202	0.991255	866	3	5.2728
Sap30l	4	0.33578	0.51001	0.992919	8760	2	0.12958	0.013528	0.058202	0.991255	867	2	0.12958
Zxdc	4	0.75526	0.77227	0.992919	14748	1	5.3878	0.013555	0.058367	0.991255	868	3	5.3878
Dbh	4	0.96305	0.95923	0.992919	18683	0	5.2132	0.013569	0.058367	0.991255	869	4	5.2132
Vmn1r82	4	0.16314	0.32094	0.992919	5234	2	2.3446	0.013584	0.058367	0.991255	870	2	2.3446
Pla2g16	4	0.84156	0.84931	0.992919	16423	0	4.5614	0.013617	0.058367	0.991255	871	3	4.5614
Tiparp	4	0.19636	0.37839	0.992919	5953	2	3.0324	0.013621	0.058367	0.991255	872	2	3.0324
E330021D16Rik	4	0.98637	0.97969	0.995623	19078	0	1.8577	0.013629	0.058367	0.991255	873	4	1.8577
Pvrl3	4	0.48121	0.58385	0.992919	10572	1	0.76868	0.013639	0.058367	0.991255	874	3	0.76868
Ppbp	3	0.98635	0.97455	0.994432	19077	0	3.9619	0.013654	0.050304	0.991255	875	3	3.9619
Rgs20	4	0.98635	0.97969	0.995623	19076	0	2.3641	0.013655	0.058367	0.991255	876	4	2.3641
Cox7a2	4	0.87794	0.88008	0.992919	17103	0	4.3656	0.013658	0.058367	0.991255	877	3	4.3656
Cilp	4	0.52062	0.61186	0.992919	11054	1	1.9561	0.013694	0.058367	0.991255	878	3	1.9561
Esp23	4	0.23865	0.41923	0.992919	6858	2	3.2697	0.013703	0.058367	0.991255	879	2	3.2697
Gm10228	4	0.98629	0.97969	0.995623	19074	0	2.7626	0.013705	0.058367	0.991255	880	4	2.7626
Gabrd	4	0.84933	0.85667	0.992919	16595	0	3.7285	0.013725	0.058367	0.991255	881	2	3.7285
Hps3	3	0.98627	0.97427	0.994432	19073	0	4.1955	0.013726	0.050547	0.991255	882	3	4.1955
Dbnl	4	0.97172	0.96391	0.992919	18798	0	4.9103	0.013743	0.058545	0.991255	883	4	4.9103
Smo	4	0.98182	0.9745	0.994432	18977	0	3.1901	0.01375	0.058545	0.991255	884	4	3.1901
Megf9	4	0.88981	0.89311	0.992919	17327	0	4.5544	0.013778	0.058545	0.991255	885	3	4.5544
Sall1	4	0.44723	0.57179	0.992919	10185	1	1.9138	0.013805	0.058545	0.991255	886	3	1.9138
Esp6	4	0.26689	0.45159	0.992919	7402	2	0.23382	0.01386	0.058545	0.991255	887	2	0.23382
Slc28a3	4	0.98613	0.97947	0.995623	19072	0	4.5192	0.013869	0.058545	0.991255	888	4	4.5192
Hsbp1l1	4	0.98611	0.97947	0.995623	19071	0	1.5163	0.013885	0.058774	0.991255	889	4	1.5163
Vmn2r23	3	0.37314	0.45811	0.992919	9393	1	6.6332	0.013913	0.051627	0.991255	890	2	6.6332
Dyx1c1	4	0.2188	0.40002	0.992919	6452	1	5.2612	0.013936	0.058774	0.991255	891	3	5.2612
Olfr1437	3	0.97813	0.96418	0.992919	18908	0	7.1138	0.01394	0.051627	0.991255	892	3	7.1138
Ninj2	4	0.71356	0.73891	0.992919	13968	1	2.9578	0.013971	0.058775	0.991255	893	2	2.9578
Por	4	0.77077	0.77892	0.992919	15046	0	5.5524	0.013975	0.058775	0.991255	894	3	5.5524
Tpd52l2	4	0.12372	0.26242	0.992919	4327	2	3.2471	0.013981	0.058775	0.991255	895	2	3.2471
Tspan5	4	0.986	0.97947	0.995623	19070	0	2.4046	0.013997	0.058775	0.991255	896	4	2.4046
Ap1s1	4	0.23827	0.41923	0.992919	6853	2	-1.146	0.014026	0.058775	0.991255	897	1	-1.146
Mroh6	4	0.98597	0.97947	0.995623	19069	0	1.9935	0.014032	0.058775	0.991255	898	4	1.9935
Myo1b	4	0.97398	0.96558	0.993276	18838	0	5.3535	0.014079	0.05964	0.991255	899	4	5.3535
Prn	4	0.93805	0.94241	0.992919	18215	0	0.91725	0.014081	0.05964	0.991255	900	3	0.91725
Cyb561d1	4	0.74999	0.76955	0.992919	14665	1	4.7126	0.014094	0.059641	0.991255	901	3	4.7126
Tmub2	4	0.9859	0.97947	0.995623	19068	0	3.2622	0.014096	0.059873	0.991255	902	4	3.2622
Tmed2	4	0.91314	0.92392	0.992919	17747	0	4.844	0.014123	0.06008	0.991255	903	3	4.844
Atp5s	4	0.86685	0.86882	0.992919	16907	0	6.2405	0.01413	0.06008	0.991255	904	3	6.2405
AK010878	4	0.75697	0.77361	0.992919	14779	1	2.4575	0.014136	0.060081	0.991255	905	3	2.4575
Vmn2r95	4	0.94851	0.94982	0.992919	18409	0	4.2888	0.014177	0.060913	0.991255	906	4	4.2888
Pyroxd2	4	0.30492	0.47762	0.992919	8158	1	3.2543	0.014192	0.060914	0.991255	907	3	3.2543
Hey1	4	0.8015	0.81977	0.992919	15639	0	4.5172	0.014224	0.061152	0.991255	908	3	4.5172
Hus1b	4	0.85595	0.86145	0.992919	16716	0	3.4592	0.014302	0.061152	0.991255	909	3	3.4592
Nkain4	4	0.98568	0.979	0.995623	19066	0	2.4974	0.014319	0.061152	0.991255	910	4	2.4974
Olfr447	4	0.98566	0.979	0.995623	19065	0	3.235	0.014339	0.061153	0.991255	911	4	3.235
Arxes2	4	0.98565	0.979	0.995623	19064	0	1.3945	0.014349	0.061153	0.991255	912	4	1.3945
Defb48	4	0.05984	0.15784	0.992919	2517	1	-0.61302	0.014357	0.061153	0.991255	913	2	-0.61302
Lgmn	4	0.98561	0.979	0.995623	19063	0	3.1663	0.014391	0.061153	0.991255	914	4	3.1663
Psrc1	4	0.89552	0.90199	0.992919	17409	0	5.9762	0.014402	0.061153	0.991255	915	3	5.9762
Styx	4	0.75823	0.77492	0.992919	14805	1	2.306	0.014413	0.061153	0.991255	916	2	2.306
Tns2	4	0.83974	0.84783	0.992919	16383	0	5.598	0.014491	0.061348	0.991255	917	3	5.598
Hnrnpl	1	0.9855	0.98862	0.996948	19062	0	10.186	0.014498	0.011382	0.991255	918	1	10.186
Slc7a2	4	0.74804	0.7649	0.992919	14631	1	5.2594	0.014511	0.061348	0.991255	919	3	5.2594
Msgn1	4	0.26282	0.44476	0.992919	7313	1	-0.19668	0.014523	0.061348	0.991255	920	1	-0.19668
Rassf3	4	0.98543	0.97876	0.995623	19061	0	4.0708	0.014574	0.061349	0.991255	921	4	4.0708
Phactr3	4	0.76256	0.77759	0.992919	14873	1	4.1606	0.014576	0.061349	0.991255	922	3	4.1606
Sec13	3	0.78943	0.79024	0.992919	15404	0	6.6968	0.014608	0.05257	0.991255	923	2	6.6968
Foxp3	4	0.79468	0.81165	0.992919	15502	0	2.6542	0.014634	0.061349	0.991255	924	2	2.6542
Gzmm	4	0.60292	0.67337	0.992919	12251	1	4.7	0.014645	0.061349	0.991255	925	3	4.7
Stil	3	0.91997	0.9124	0.992919	17880	0	-0.58916	0.014649	0.05257	0.991255	926	3	-0.58916
Eif2ak2	3	0.89563	0.89666	0.992919	17413	0	6.6007	0.01465	0.05257	0.991255	927	3	6.6007
Pfkl	4	0.98533	0.97853	0.995623	19059	0	2.4998	0.014674	0.061546	0.991255	928	4	2.4998
Tubg1	3	0.2071	0.36089	0.992919	6203	2	-2.3671	0.014691	0.05257	0.991255	929	1	-2.3671
Synb	4	0.96017	0.95692	0.992919	18625	0	5.4161	0.014691	0.061546	0.991255	930	4	5.4161
Rfxank	4	0.98531	0.97853	0.995623	19058	0	4.7968	0.014694	0.061546	0.991255	931	4	4.7968
Fbxo48	4	0.98528	0.97853	0.995623	19057	0	3.8168	0.014717	0.061546	0.991255	932	4	3.8168
Ppp1r14a	4	0.80554	0.82034	0.992919	15699	0	5.2335	0.014725	0.061546	0.991255	933	3	5.2335
Ptk2b	4	0.25672	0.43258	0.992919	7202	2	2.5511	0.014738	0.061546	0.991255	934	2	2.5511
Trip13	1	0.98524	0.98756	0.996888	19056	0	10.144	0.014763	0.012436	0.991255	935	1	10.144
Vasn	4	0.30464	0.47762	0.992919	8152	2	2.1325	0.014776	0.061732	0.991255	936	2	2.1325
Gm14744	4	0.98521	0.97829	0.995594	19055	0	3.0746	0.014794	0.061732	0.991255	937	4	3.0746
Rai2	4	0.9852	0.97829	0.995594	19054	0	1.803	0.014797	0.061732	0.991255	938	4	1.803
Uvssa	4	0.71742	0.7416	0.992919	14033	1	3.3909	0.014807	0.061732	0.991255	939	2	3.3909
Vsig2	3	0.98519	0.974	0.994432	19053	0	4.7979	0.014815	0.05257	0.991255	940	3	4.7979
Olfr686	4	0.62667	0.69275	0.992919	12588	1	3.1811	0.014854	0.061732	0.991255	941	3	3.1811
Rasd1	4	0.98514	0.97829	0.995594	19051	0	5.1847	0.014856	0.061732	0.991255	942	4	5.1847
Psd4	4	0.016069	0.072012	0.992919	842	2	-0.84653	0.01491	0.062395	0.991255	943	1	-0.84653
Hiat1	4	0.86191	0.86699	0.992919	16808	0	5.295	0.014916	0.062396	0.991255	944	3	5.295
Speer2	3	0.62261	0.64416	0.992919	12531	1	3.7408	0.01494	0.052926	0.991255	945	2	3.7408
Olfr1500	4	0.89611	0.90273	0.992919	17423	0	6.1892	0.014971	0.062591	0.991255	946	3	6.1892
Adam11	3	0.96143	0.94831	0.992919	18652	0	6.5793	0.014981	0.052926	0.991255	947	3	6.5793
Tmprss12	4	0.76959	0.77892	0.992919	15013	1	3.1445	0.01502	0.062984	0.991255	948	3	3.1445
Pwp2	3	0.11859	0.23732	0.992919	4189	1	3.0327	0.015023	0.052926	0.991255	949	2	3.0327
Gpr179	4	0.98497	0.97756	0.995164	19049	0	2.6522	0.015025	0.062984	0.991255	950	4	2.6522
Cptp	4	0.42887	0.56106	0.992919	9971	1	5.3111	0.015056	0.063379	0.991255	951	3	5.3111
H1f0	4	0.66449	0.71077	0.992919	13191	1	5.766	0.015072	0.063379	0.991255	952	3	5.766
Rilpl2	4	0.695	0.72957	0.992919	13687	1	3.7091	0.015075	0.063379	0.991255	953	3	3.7091
Hpcal1	4	0.76747	0.77892	0.992919	14961	1	3.9528	0.015088	0.063379	0.991255	954	2	3.9528
Cabp2	3	0.9664	0.95325	0.992919	18724	0	6.7293	0.015099	0.052927	0.991255	955	3	6.7293
Odf4	4	0.75213	0.77159	0.992919	14707	1	0.72485	0.01513	0.063379	0.991255	956	3	0.72485
Eif1ad	1	0.98486	0.98756	0.996888	19048	0	10.103	0.01514	0.012436	0.991255	957	1	10.103
Ndufaf1	3	0.47735	0.54029	0.992919	10529	1	-1.3059	0.015147	0.052927	0.991255	958	1	-1.3059
Hoxd8	4	0.98485	0.97709	0.994738	19047	0	3.889	0.01515	0.063379	0.991255	959	4	3.889
Bmpr2	4	0.038331	0.11904	0.992919	1731	2	0.14133	0.015186	0.063379	0.991255	960	2	0.14133
Olfr484	3	0.20718	0.36179	0.992919	6211	1	6.6014	0.015229	0.052927	0.991255	961	2	6.6014
Retnlb	3	0.98476	0.974	0.994432	19045	0	3.2526	0.015238	0.052927	0.991255	962	3	3.2526
Prdx2	4	0.77906	0.79066	0.992919	15201	0	3.0024	0.015241	0.063831	0.991255	963	2	3.0024
Zbtb48	4	0.34296	0.51497	0.992919	8904	1	6.445	0.015253	0.064029	0.991255	964	3	6.445
Cacna2d3	4	0.13277	0.27597	0.992919	4532	1	4.8605	0.015276	0.064524	0.991255	965	3	4.8605
Cab39l	4	0.98365	0.97581	0.994432	19015	0	4.1802	0.015296	0.064524	0.991255	966	4	4.1802
Hip1	4	0.92325	0.93088	0.992919	17948	0	5.1958	0.015313	0.064524	0.991255	967	3	5.1958
Pcyox1	4	0.70657	0.73358	0.992919	13857	1	3.2267	0.015339	0.064525	0.991255	968	2	3.2267
Yipf1	4	0.26495	0.44556	0.992919	7370	1	1.9847	0.015351	0.064525	0.991255	969	2	1.9847
Dbpht2	2	0.41561	0.45308	0.992919	9832	1	5.266	0.015367	0.033371	0.991255	970	1	5.266
Rps6ka5	3	0.98461	0.97373	0.994432	19044	0	4.5246	0.015394	0.056377	0.991255	971	3	4.5246
Hps6	4	0.98458	0.97686	0.9946	19043	0	4.4891	0.015425	0.064753	0.991255	972	4	4.4891
Rd3l	4	0.67738	0.72021	0.992919	13392	1	4.8473	0.015429	0.064753	0.991255	973	3	4.8473
Ppp1r14d	3	0.75885	0.76869	0.992919	14809	0	1.9473	0.015437	0.057115	0.991255	974	2	1.9473
Gcnt1	4	0.54648	0.63184	0.992919	11405	1	-0.93969	0.015462	0.065217	0.991255	975	1	-0.93969
Klhdc1	4	0.41435	0.55704	0.992919	9819	1	1.1764	0.015517	0.065441	0.991255	976	3	1.1764
Zfp729b	4	0.0021482	0.013035	0.992919	148	2	3.5402	0.015521	0.065441	0.991255	977	2	3.5402
Mcts2	3	0.98446	0.97319	0.994432	19042	0	4.9495	0.015544	0.057598	0.991255	978	3	4.9495
Zfp120	3	0.98443	0.97319	0.994432	19041	0	6.4075	0.015567	0.057598	0.991255	979	3	6.4075
Atp1b4	4	0.45026	0.57313	0.992919	10219	1	3.7823	0.015568	0.065441	0.991255	980	2	3.7823
Cask	4	0.34184	0.51497	0.992919	8877	1	2.8558	0.015572	0.065441	0.991255	981	2	2.8558
Enoph1	4	0.90962	0.91705	0.992919	17676	0	3.915	0.015576	0.065441	0.991255	982	3	3.915
Nucb1	4	0.98441	0.97659	0.994432	19040	0	4.7771	0.01559	0.065441	0.991255	983	4	4.7771
Trps1	4	0.43644	0.56377	0.992919	10055	1	3.758	0.0156	0.065441	0.991255	984	2	3.758
Rhof	4	0.98439	0.97659	0.994432	19039	0	2.7365	0.015608	0.065441	0.991255	985	4	2.7365
Pfpl	4	0.080986	0.2028	0.992919	3239	1	4.9776	0.015627	0.065441	0.991255	986	3	4.9776
Ankle1	4	0.8	0.81865	0.992919	15603	0	5.3338	0.015633	0.065686	0.991255	987	3	5.3338
Gltp	4	0.24565	0.42133	0.992919	6992	2	3.2563	0.015648	0.065686	0.991255	988	2	3.2563
Pias2	4	0.85677	0.86145	0.992919	16731	0	3.7307	0.015679	0.065686	0.991255	989	3	3.7307
C8b	4	0.9843	0.97659	0.994432	19038	0	4.2573	0.0157	0.065686	0.991255	990	4	4.2573
Ppih	4	0.98427	0.97659	0.994432	19037	0	5.3612	0.015733	0.065686	0.991255	991	4	5.3612
Ccdc36	4	0.98426	0.97659	0.994432	19036	0	2.8586	0.015738	0.065686	0.991255	992	4	2.8586
Bcl9l	4	0.19137	0.37277	0.992919	5833	1	1.0367	0.015738	0.065686	0.991255	993	2	1.0367
Slc37a3	4	0.92592	0.93306	0.992919	18015	0	3.6911	0.015751	0.06594	0.991255	994	3	3.6911
Katnal1	4	0.98423	0.97659	0.994432	19035	0	2.7201	0.015772	0.06594	0.991255	995	4	2.7201
Olfr1411	4	0.98421	0.97659	0.994432	19034	0	3.0093	0.01579	0.06594	0.991255	996	4	3.0093
Vwc2l	4	0.98419	0.97659	0.994432	19033	0	5.6886	0.015812	0.06594	0.991255	997	4	5.6886
Acta1	4	0.98418	0.97659	0.994432	19032	0	1.8882	0.015821	0.06594	0.991255	998	4	1.8882
Fkrp	4	0.12479	0.26536	0.992919	4353	1	4.2595	0.015823	0.06594	0.991255	999	3	4.2595
1190002N15Rik	2	0.98416	0.97684	0.9946	19031	0	6.3347	0.015838	0.033667	0.991255	1000	2	6.3347
Phf12	4	0.87831	0.88008	0.992919	17112	0	5.0335	0.015846	0.06594	0.991255	1001	3	5.0335
Mthfsd	4	0.60162	0.67268	0.992919	12188	1	3.8754	0.015855	0.06594	0.991255	1002	2	3.8754
Cxadr	4	0.82613	0.83622	0.992919	16137	0	5.4457	0.015896	0.06594	0.991255	1003	3	5.4457
Cpne9	4	0.9841	0.97659	0.994432	19030	0	3.4164	0.015897	0.06594	0.991255	1004	4	3.4164
Fam98c	4	0.98409	0.97659	0.994432	19029	0	3.9278	0.015909	0.065941	0.991255	1005	4	3.9278
Plin4	4	0.94898	0.95027	0.992919	18423	0	4.9243	0.015915	0.065941	0.991255	1006	4	4.9243
Vmn2r22	4	0.91452	0.92572	0.992919	17769	0	5.287	0.015927	0.065941	0.991255	1007	3	5.287
Rhbdf2	3	0.98407	0.9729	0.994432	19028	0	3.8003	0.015933	0.061012	0.991255	1008	3	3.8003
Ehhadh	4	0.93484	0.93991	0.992919	18153	0	4.9913	0.015946	0.065941	0.991255	1009	3	4.9913
Clca4a	4	0.71262	0.73891	0.992919	13957	1	5.042	0.015951	0.065941	0.991255	1010	3	5.042
Lman2	4	0.29244	0.47187	0.992919	7902	1	-0.69459	0.015958	0.065941	0.991255	1011	1	-0.69459
Snx20	4	0.98403	0.97659	0.994432	19027	0	2.5893	0.015975	0.065941	0.991255	1012	4	2.5893
Epc2	4	0.98401	0.97659	0.994432	19026	0	3.4832	0.015992	0.065941	0.991255	1013	4	3.4832
Gdap2	4	0.984	0.97659	0.994432	19025	0	2.5409	0.016005	0.065941	0.991255	1014	4	2.5409
Fbxw26	4	0.97492	0.96639	0.993276	18848	0	4.3932	0.016008	0.065941	0.991255	1015	4	4.3932
Lao1	4	0.98399	0.97659	0.994432	19024	0	3.6221	0.016012	0.065941	0.991255	1016	4	3.6221
Zfp28	4	0.93796	0.94241	0.992919	18213	0	3.3277	0.016013	0.065941	0.991255	1017	3	3.3277
Vmn1r59	3	0.73356	0.74693	0.992919	14341	0	2.1456	0.016017	0.061012	0.991255	1018	2	2.1456
Art1	4	0.61396	0.68336	0.992919	12414	1	5.611	0.016034	0.065941	0.991255	1019	3	5.611
Senp5	4	0.98397	0.97659	0.994432	19023	0	5.6571	0.016035	0.065941	0.991255	1020	4	5.6571
Mark1	4	0.98394	0.97635	0.994432	19022	0	3.6886	0.016055	0.06614	0.991255	1021	4	3.6886
Utrn	4	0.3263	0.49529	0.992919	8586	1	4.5837	0.016073	0.069755	0.991255	1022	3	4.5837
Grm3	4	0.98392	0.97635	0.994432	19021	0	2.1521	0.016078	0.069755	0.991255	1023	4	2.1521
Usp33	4	0.98391	0.97635	0.994432	19020	0	2.6037	0.016088	0.069755	0.991255	1024	4	2.6037
Kcnj9	4	0.72728	0.74818	0.992919	14231	1	3.3854	0.016088	0.069755	0.991255	1025	3	3.3854
Nrn1	4	0.87917	0.88008	0.992919	17127	0	5.9245	0.016092	0.069755	0.991255	1026	3	5.9245
Pkd2l2	4	0.89986	0.90601	0.992919	17495	0	5.8055	0.016096	0.069755	0.991255	1027	3	5.8055
Ambp	4	0.98389	0.97635	0.994432	19019	0	1.9096	0.016113	0.069755	0.991255	1028	4	1.9096
Clnk	3	0.98383	0.9729	0.994432	19018	0	6.5317	0.016173	0.061012	0.991255	1029	3	6.5317
Olfr1211	4	0.22726	0.41224	0.992919	6632	2	2.1897	0.016177	0.069974	0.991255	1030	2	2.1897
Mepce	4	0.078423	0.20166	0.992919	3132	3	-2.0947	0.016179	0.069974	0.991255	1031	1	-2.0947
Upk3bl	4	0.75213	0.77159	0.992919	14706	1	3.9051	0.016234	0.069975	0.991255	1032	2	3.9051
Madcam1	4	0.25493	0.43204	0.992919	7166	1	4.1212	0.016249	0.069975	0.991255	1033	2	4.1212
Myo1e	4	0.059618	0.15598	0.992919	2508	3	-0.86247	0.016289	0.069975	0.991255	1034	1	-0.86247
Pax1	4	0.94154	0.9453	0.992919	18271	0	3.9708	0.016344	0.070695	0.991255	1035	3	3.9708
Ptpru	4	0.42887	0.56106	0.992919	9969	1	4.4678	0.016347	0.070695	0.991255	1036	3	4.4678
Nr2e1	3	0.93051	0.91752	0.992919	18079	0	1.5367	0.016349	0.061806	0.991255	1037	3	1.5367
R3hcc1	4	0.98365	0.97581	0.994432	19014	0	3.6455	0.016352	0.070695	0.991255	1038	4	3.6455
Ncln	4	0.98365	0.97581	0.994432	19013	0	2.5115	0.016354	0.070695	0.991255	1039	4	2.5115
Rhot1	4	0.36616	0.53036	0.992919	9323	1	5.6348	0.01636	0.070695	0.991255	1040	3	5.6348
Heatr5a	4	0.82275	0.83299	0.992919	16048	0	3.452	0.016363	0.070695	0.991255	1041	2	3.452
Mospd2	4	0.9836	0.97581	0.994432	19011	0	3.3723	0.016396	0.070696	0.991255	1042	4	3.3723
Abcd3	4	0.85355	0.8586	0.992919	16665	0	3.7492	0.0164	0.070696	0.991255	1043	3	3.7492
Nat1	4	0.10404	0.24155	0.992919	3871	1	4.9366	0.016419	0.070696	0.991255	1044	3	4.9366
Creb3l4	3	0.90879	0.90542	0.992919	17651	0	7.0727	0.016448	0.061806	0.991255	1045	3	7.0727
Insl6	4	0.8735	0.8741	0.992919	17032	0	6.2587	0.016458	0.071178	0.991255	1046	3	6.2587
Hoxa5	4	0.98353	0.9758	0.994432	19010	0	4.499	0.01647	0.071178	0.991255	1047	4	4.499
Nim1k	3	0.46627	0.53223	0.992919	10406	1	5.7614	0.016473	0.061806	0.991255	1048	2	5.7614
Nek11	4	0.98349	0.97556	0.994432	19009	0	2.7043	0.016511	0.071384	0.991255	1049	4	2.7043
Tmeff1	4	0.98348	0.97556	0.994432	19008	0	1.6891	0.016521	0.071384	0.991255	1050	4	1.6891
Agmo	4	0.98347	0.97556	0.994432	19007	0	3.518	0.016526	0.071384	0.991255	1051	4	3.518
P3h4	4	0.95377	0.952	0.992919	18508	0	5.5178	0.01656	0.071384	0.991255	1052	4	5.5178
Nod1	4	0.79389	0.81165	0.992919	15486	0	3.4112	0.016565	0.071384	0.991255	1053	2	3.4112
Coro1b	4	0.25475	0.43204	0.992919	7151	2	1.5026	0.01662	0.071384	0.991255	1054	2	1.5026
F8a	4	0.98337	0.97529	0.994432	19006	0	2.4506	0.016634	0.0716	0.991255	1055	4	2.4506
Epas1	4	0.96773	0.96145	0.992919	18743	0	5.2439	0.016634	0.0716	0.991255	1056	4	5.2439
Ccr1l1	4	0.98333	0.97529	0.994432	19005	0	5.4217	0.016665	0.0716	0.991255	1057	4	5.4217
Cd86	4	0.75718	0.77361	0.992919	14781	1	4.6487	0.016666	0.0716	0.991255	1058	3	4.6487
Mon1b	4	0.65478	0.70404	0.992919	13041	1	4.0649	0.016675	0.0716	0.991255	1059	3	4.0649
Znrd1as	4	0.48273	0.58385	0.992919	10584	1	3.0124	0.016697	0.071834	0.991255	1060	2	3.0124
St3gal4	4	0.61497	0.68532	0.992919	12425	1	5.5078	0.016698	0.071834	0.991255	1061	3	5.5078
Oprm1	4	0.98328	0.97529	0.994432	19004	0	3.409	0.016717	0.071834	0.991255	1062	4	3.409
Ostn	4	0.69924	0.73086	0.992919	13744	1	5.1524	0.016721	0.071834	0.991255	1063	3	5.1524
1700012A03Rik	4	0.98327	0.97529	0.994432	19003	0	4.651	0.016725	0.071834	0.991255	1064	4	4.651
Rnf166	4	0.16069	0.31116	0.992919	5179	2	1.6122	0.016731	0.071834	0.991255	1065	2	1.6122
Otop2	4	0.61082	0.67934	0.992919	12372	1	4.7275	0.016757	0.071834	0.991255	1066	3	4.7275
Olfr610	3	0.98324	0.97233	0.994432	19002	0	4.0183	0.016761	0.063514	0.991255	1067	3	4.0183
Gstt2	4	0.66279	0.71077	0.992919	13170	1	4.1206	0.016763	0.071834	0.991255	1068	3	4.1206
Gna13	4	0.95272	0.95159	0.992919	18493	0	4.4799	0.016801	0.071834	0.991255	1069	4	4.4799
Vax2	4	0.98316	0.97529	0.994432	19001	0	3.3549	0.01684	0.071834	0.991255	1070	4	3.3549
4930596D02Rik	4	0.80181	0.81977	0.992919	15646	0	0.45177	0.016841	0.072063	0.991255	1071	2	0.45177
Zkscan2	4	0.91881	0.92865	0.992919	17847	0	4.7757	0.016852	0.072063	0.991255	1072	3	4.7757
Psap	4	0.87853	0.88008	0.992919	17115	0	5.3789	0.01686	0.072063	0.991255	1073	3	5.3789
Pkn2	4	0.22516	0.40882	0.992919	6594	1	1.7892	0.016896	0.072569	0.991255	1074	2	1.7892
Bsph1	4	0.57346	0.64926	0.992919	11785	1	3.21	0.016928	0.072569	0.991255	1075	2	3.21
Synpr	4	0.24265	0.42133	0.992919	6926	2	-0.38404	0.016951	0.072569	0.991255	1076	1	-0.38404
Nlrp2	4	0.82928	0.83945	0.992919	16200	0	2.7739	0.016969	0.072569	0.991255	1077	2	2.7739
Fam104a	4	0.47022	0.58117	0.992919	10450	1	3.7722	0.016977	0.07257	0.991255	1078	2	3.7722
Ppp1r3g	2	0.7888	0.78388	0.992919	15395	0	6.0197	0.017001	0.035224	0.991255	1079	2	6.0197
Irgc1	4	0.52626	0.61576	0.992919	11116	1	6.0703	0.017004	0.07257	0.991255	1080	3	6.0703
1700018C11Rik	4	0.89148	0.89538	0.992919	17354	0	3.5155	0.017012	0.07257	0.991255	1081	3	3.5155
Zfp553	4	0.98299	0.97529	0.994432	18999	0	3.2644	0.017013	0.07257	0.991255	1082	4	3.2644
Alas2	4	0.62314	0.69075	0.992919	12540	1	0.07008	0.017061	0.07257	0.991255	1083	2	0.07008
Lck	4	0.9829	0.97502	0.994432	18998	0	1.6541	0.0171	0.072779	0.991255	1084	4	1.6541
Zfp51	4	0.98289	0.97502	0.994432	18997	0	3.9076	0.01711	0.072779	0.991255	1085	4	3.9076
Ehd4	4	0.47943	0.58385	0.992919	10547	1	2.6618	0.017116	0.072779	0.991255	1086	3	2.6618
Ang	4	0.27888	0.46053	0.992919	7623	1	5.5836	0.017144	0.073296	0.991255	1087	3	5.5836
Sepw1	4	0.85739	0.86145	0.992919	16745	0	5.2318	0.017164	0.073296	0.991255	1088	3	5.2318
Mettl22	4	0.98283	0.97502	0.994432	18996	0	3.707	0.017167	0.073296	0.991255	1089	4	3.707
Sp7	4	0.25841	0.43581	0.992919	7227	1	0.21276	0.017172	0.073296	0.991255	1090	2	0.21276
Amtn	3	0.98279	0.97143	0.994432	18994	0	6.0472	0.017207	0.064682	0.991255	1091	3	6.0472
Klrc2	4	0.084702	0.21146	0.992919	3362	2	2.8945	0.017209	0.073296	0.991255	1092	2	2.8945
Acd	3	0.39557	0.46989	0.992919	9620	1	-1.3295	0.01726	0.064945	0.991255	1093	1	-1.3295
Fam198b	4	0.16691	0.32673	0.992919	5326	2	2.4507	0.017267	0.073555	0.991255	1094	2	2.4507
Vmn1r65	4	0.19389	0.37562	0.992919	5896	2	3.4432	0.017276	0.073555	0.991255	1095	2	3.4432
Arg2	4	0.98268	0.97502	0.994432	18993	0	2.6937	0.017323	0.073555	0.991255	1096	4	2.6937
Lmo1	4	0.98266	0.97502	0.994432	18992	0	5.0399	0.017339	0.074287	0.991255	1097	4	5.0399
Ocel1	4	0.69861	0.73086	0.992919	13737	1	5.8548	0.017346	0.074287	0.991255	1098	3	5.8548
Pdk1	4	0.98265	0.97502	0.994432	18991	0	3.5759	0.017355	0.074287	0.991255	1099	4	3.5759
Reep1	4	0.88865	0.89237	0.992919	17300	0	5.4412	0.017358	0.074287	0.991255	1100	3	5.4412
Slc6a3	4	0.5565	0.64248	0.992919	11548	1	0.87264	0.017392	0.074288	0.991255	1101	3	0.87264
Dvl1	3	0.9826	0.97082	0.994356	18990	0	2.3286	0.017403	0.065641	0.991255	1102	3	2.3286
Piwil1	4	0.37447	0.53301	0.992919	9403	1	3.8293	0.017417	0.074541	0.991255	1103	3	3.8293
Nostrin	4	0.93803	0.94241	0.992919	18214	0	5.1383	0.017435	0.07478	0.991255	1104	3	5.1383
Poll	4	0.82548	0.83622	0.992919	16119	0	3.623	0.017447	0.07478	0.991255	1105	3	3.623
Olfml2a	4	0.98247	0.97502	0.994432	18989	0	2.4883	0.017531	0.07478	0.991255	1106	4	2.4883
Olfr1176	3	0.98245	0.97053	0.994163	18988	0	3.5607	0.017547	0.065888	0.991255	1107	3	3.5607
Rtf1	3	0.70717	0.72426	0.992919	13868	0	-1.613	0.01755	0.065888	0.991255	1108	1	-1.613
5430419D17Rik	4	0.38992	0.54497	0.992919	9547	1	1.8244	0.017557	0.075036	0.991255	1109	3	1.8244
Batf3	4	0.98241	0.97502	0.994432	18987	0	3.222	0.017588	0.075036	0.991255	1110	4	3.222
Bspry	4	0.98241	0.97502	0.994432	18986	0	2.433	0.017591	0.075036	0.991255	1111	4	2.433
Vac14	4	0.9824	0.97502	0.994432	18985	0	2.0841	0.017602	0.075036	0.991255	1112	4	2.0841
Uty	4	0.02161	0.087436	0.992919	1069	2	-0.10835	0.017612	0.075036	0.991255	1113	2	-0.10835
Nfe2	4	0.44937	0.57313	0.992919	10210	1	4.1456	0.017627	0.075036	0.991255	1114	2	4.1456
Zrsr1	4	0.98236	0.97502	0.994432	18984	0	3.01	0.017639	0.075036	0.991255	1115	4	3.01
Ccdc130	4	0.90931	0.91576	0.992919	17668	0	4.5337	0.017643	0.075037	0.991255	1116	3	4.5337
Rabep1	4	0.91858	0.92865	0.992919	17843	0	5.5078	0.017663	0.075037	0.991255	1117	3	5.5078
Catsperb	4	0.94862	0.94982	0.992919	18412	0	2.8911	0.017668	0.075037	0.991255	1118	4	2.8911
Wipf2	4	0.92345	0.93088	0.992919	17952	0	3.9477	0.017686	0.075037	0.991255	1119	3	3.9477
Rab2a	4	0.96244	0.95886	0.992919	18671	0	2.2515	0.017723	0.075037	0.991255	1120	4	2.2515
Slc34a2	4	0.086545	0.21495	0.992919	3424	2	3.0599	0.017728	0.075037	0.991255	1121	2	3.0599
Olfr46	4	0.55288	0.64116	0.992919	11497	1	0.86785	0.017778	0.075238	0.991255	1122	2	0.86785
Zfp36l3	4	0.032678	0.11306	0.992919	1529	1	3.8425	0.017787	0.075239	0.991255	1123	3	3.8425
Sat2	4	0.98221	0.97478	0.994432	18983	0	3.261	0.017794	0.075239	0.991255	1124	4	3.261
Camk2b	3	0.21481	0.37034	0.992919	6386	1	1.1012	0.017798	0.065889	0.991255	1125	2	1.1012
Speer4f	4	0.87297	0.8741	0.992919	17022	0	5.2441	0.017799	0.075239	0.991255	1126	3	5.2441
Ppp1r9a	4	0.98218	0.97478	0.994432	18982	0	3.6318	0.01782	0.075239	0.991255	1127	4	3.6318
Xpa	4	0.14408	0.2901	0.992919	4807	1	4.0058	0.017829	0.075493	0.991255	1128	2	4.0058
Ifne	4	0.3525	0.52377	0.992919	9083	2	3.0916	0.017854	0.075493	0.991255	1129	2	3.0916
Mzf1	3	0.98212	0.97053	0.994163	18981	0	5.4242	0.017878	0.065889	0.991255	1130	3	5.4242
Phf8	4	0.74454	0.76017	0.992919	14558	1	3.5148	0.017905	0.075759	0.991255	1131	2	3.5148
Kif21b	4	0.98206	0.97478	0.994432	18980	0	3.261	0.017941	0.075759	0.991255	1132	4	3.261
Mterf1a	4	0.84384	0.8503	0.992919	16500	0	-0.020334	0.017943	0.075759	0.991255	1133	2	-0.020334
Slc30a8	3	0.98205	0.97024	0.994163	18979	0	5.9655	0.017954	0.066137	0.991255	1134	3	5.9655
Nup37	4	0.98201	0.97478	0.994432	18978	0	1.8426	0.017985	0.07576	0.991255	1135	4	1.8426
Ms4a7	4	0.10558	0.24155	0.992919	3906	1	5.4142	0.018017	0.07576	0.991255	1136	3	5.4142
Ifna12	4	0.89678	0.90309	0.992919	17431	0	1.0306	0.018053	0.076236	0.991255	1137	3	1.0306
Ndp	4	0.79042	0.802	0.992919	15422	0	4.9338	0.018067	0.076236	0.991255	1138	3	4.9338
Ipp	4	0.88375	0.88427	0.992919	17211	0	5.7248	0.018084	0.076236	0.991255	1139	3	5.7248
Ces2h	4	0.71948	0.74291	0.992919	14073	1	1.3762	0.018108	0.076236	0.991255	1140	2	1.3762
Reps1	4	0.45672	0.57577	0.992919	10303	1	5.1986	0.018117	0.076236	0.991255	1141	3	5.1986
Grik4	3	0.007999	0.036301	0.992919	476	2	-1.6929	0.018129	0.066795	0.991255	1142	1	-1.6929
Krt33b	4	0.57702	0.65328	0.992919	11831	1	0.16608	0.018163	0.076236	0.991255	1143	1	0.16608
Spata31d1c	4	0.80021	0.81865	0.992919	15610	0	0.58145	0.018218	0.076464	0.991255	1144	3	0.58145
Foxd1	4	0.039252	0.11988	0.992919	1768	2	2.7902	0.018219	0.076464	0.991255	1145	2	2.7902
Lama2	3	0.98178	0.96963	0.994163	18976	0	2.5337	0.01822	0.067058	0.991255	1146	3	2.5337
Zbtb40	4	0.98175	0.97423	0.994432	18975	0	3.4445	0.01825	0.076674	0.991255	1147	4	3.4445
Papln	4	0.83027	0.83945	0.992919	16220	0	5.6283	0.018251	0.076674	0.991255	1148	3	5.6283
Olfr149	4	0.98175	0.97423	0.994432	18974	0	2.8987	0.018253	0.076674	0.991255	1149	4	2.8987
Spns3	4	0.96132	0.95848	0.992919	18649	0	1.4453	0.018274	0.076674	0.991255	1150	4	1.4453
C1galt1c1	4	0.63577	0.69604	0.992919	12759	1	4.8519	0.01828	0.076674	0.991255	1151	3	4.8519
Creg1	3	0.98167	0.96932	0.994163	18973	0	6.3079	0.018327	0.067324	0.991255	1152	3	6.3079
Slc22a4	4	0.98165	0.97423	0.994432	18972	0	1.7855	0.018351	0.076675	0.991255	1153	4	1.7855
Cttnbp2nl	4	0.9586	0.95615	0.992919	18600	0	4.7442	0.018399	0.07718	0.991255	1154	4	4.7442
Nts	4	0.98158	0.97423	0.994432	18969	0	1.5716	0.01842	0.07718	0.991255	1155	4	1.5716
Drd2	4	0.98158	0.97423	0.994432	18970	0	4.6438	0.01842	0.07718	0.991255	1156	4	4.6438
Fcamr	4	0.21179	0.39286	0.992919	6309	1	3.6492	0.018433	0.07718	0.991255	1157	2	3.6492
Dguok	4	0.79272	0.80569	0.992919	15471	0	4.976	0.018435	0.07718	0.991255	1158	3	4.976
Lcp1	4	0.87169	0.87364	0.992919	16994	0	4.3765	0.018448	0.07718	0.991255	1159	3	4.3765
Olfr1053	4	0.77642	0.78742	0.992919	15162	0	5.2865	0.018477	0.077181	0.991255	1160	3	5.2865
Boll	4	0.98151	0.97423	0.994432	18968	0	3.4411	0.018489	0.077181	0.991255	1161	4	3.4411
Uba7	4	0.022875	0.094094	0.992919	1129	3	-1.0998	0.018494	0.077181	0.991255	1162	1	-1.0998
Traf7	4	0.34296	0.51497	0.992919	8901	1	4.3262	0.018502	0.077181	0.991255	1163	3	4.3262
Ndc1	4	0.9778	0.9705	0.994163	18899	0	4.8027	0.018502	0.077181	0.991255	1164	4	4.8027
Nek10	4	0.8233	0.83408	0.992919	16081	0	5.515	0.018507	0.077181	0.991255	1165	3	5.515
Cd59a	4	0.98146	0.97423	0.994432	18967	0	3.4024	0.01854	0.077181	0.991255	1166	4	3.4024
Man1a2	4	0.77642	0.78742	0.992919	15145	0	3.288	0.018549	0.077181	0.991255	1167	3	3.288
Agpat1	4	0.74804	0.7649	0.992919	14636	1	3.0093	0.018659	0.077921	0.991255	1168	2	3.0093
D3Ertd254e	3	0.98129	0.96811	0.993465	18965	0	5.8347	0.018708	0.068375	0.991255	1169	3	5.8347
Dpys	4	0.032733	0.11306	0.992919	1532	1	3.6187	0.018714	0.077921	0.991255	1170	3	3.6187
Cul9	4	0.98127	0.97368	0.994432	18964	0	2.7932	0.018731	0.078146	0.991255	1171	4	2.7932
Tulp4	4	0.27226	0.45682	0.992919	7501	1	5.9523	0.018744	0.078146	0.991255	1172	3	5.9523
Ammecr1l	3	0.98125	0.96811	0.993465	18963	0	3.3857	0.018747	0.068375	0.991255	1173	3	3.3857
Cdk4	4	0.98125	0.97368	0.994432	18962	0	3.1963	0.01875	0.078146	0.991255	1174	4	3.1963
Rmdn1	4	0.98123	0.97368	0.994432	18961	0	2.3307	0.018765	0.078146	0.991255	1175	4	2.3307
Gm20747	4	0.84384	0.8503	0.992919	16487	0	1.4333	0.018769	0.078146	0.991255	1176	2	1.4333
Fermt3	4	0.58861	0.65984	0.992919	11987	1	4.783	0.018769	0.078146	0.991255	1177	3	4.783
Lst1	4	0.46046	0.57847	0.992919	10337	1	5.249	0.01879	0.078379	0.991255	1178	3	5.249
Dync2h1	3	0.41238	0.48302	0.992919	9796	1	0.81437	0.018791	0.068375	0.991255	1179	2	0.81437
Zbtb4	4	0.6832	0.72425	0.992919	13479	1	0.53107	0.018824	0.078379	0.991255	1180	2	0.53107
Gja1	4	0.98118	0.9734	0.994432	18960	0	2.2333	0.018825	0.078379	0.991255	1181	4	2.2333
Cd3d	4	0.95448	0.95244	0.992919	18520	0	4.7297	0.018837	0.07838	0.991255	1182	4	4.7297
Prr16	4	0.98116	0.9734	0.994432	18959	0	2.581	0.018845	0.07838	0.991255	1183	4	2.581
Actr1b	2	0.62216	0.62816	0.992919	12530	0	5.2906	0.018855	0.04213	0.991255	1184	1	5.2906
Olfr661	4	0.88977	0.89311	0.992919	17325	0	5.5059	0.018859	0.07838	0.991255	1185	3	5.5059
Chrnb4	4	0.24193	0.42133	0.992919	6912	2	2.7628	0.018916	0.078637	0.991255	1186	2	2.7628
Wiz	3	0.032319	0.091292	0.992919	1514	2	-2.339	0.018956	0.068376	0.991255	1187	1	-2.339
Fam208a	4	0.306	0.4812	0.992919	8170	2	0.76395	0.018989	0.078637	0.991255	1188	2	0.76395
Ptchd3	4	0.29302	0.4734	0.992919	7919	1	3.9644	0.019038	0.078637	0.991255	1189	3	3.9644
Ska2	2	0.56899	0.58228	0.992919	11703	0	4.4999	0.019048	0.04213	0.991255	1190	1	4.4999
Acat2	4	0.95946	0.95692	0.992919	18615	0	1.311	0.019099	0.078638	0.991255	1191	4	1.311
Coq6	3	0.98088	0.96779	0.993465	18958	0	4.3141	0.019116	0.068656	0.991255	1192	3	4.3141
Kcnj14	4	0.98088	0.9734	0.994432	18957	0	3.4379	0.019122	0.078638	0.991255	1193	4	3.4379
H2afb2	4	0.40998	0.55443	0.992919	9769	1	3.8654	0.019154	0.078638	0.991255	1194	3	3.8654
Ptpn1	4	0.98079	0.9734	0.994432	18955	0	3.9995	0.019208	0.078638	0.991255	1195	4	3.9995
Ttc36	4	0.52032	0.61186	0.992919	11050	1	3.591	0.019209	0.078638	0.991255	1196	2	3.591
Pot1b	3	0.58931	0.62373	0.992919	11997	1	0.33716	0.019287	0.068656	0.991255	1197	2	0.33716
Zcchc13	4	0.5396	0.61979	0.992919	11302	1	4.4613	0.0193	0.078898	0.991255	1198	3	4.4613
Lpin1	4	0.96551	0.96074	0.992919	18708	0	4.9798	0.019301	0.078898	0.991255	1199	4	4.9798
Ros1	4	0.98068	0.9734	0.994432	18954	0	3.2933	0.019318	0.078898	0.991255	1200	4	3.2933
Dclk3	4	0.056914	0.15124	0.992919	2419	2	1.7053	0.019326	0.078898	0.991255	1201	2	1.7053
Gipc3	3	0.88106	0.88746	0.992919	17161	0	5.3924	0.01934	0.069345	0.991255	1202	2	5.3924
Tspan18	4	0.28544	0.46307	0.992919	7763	1	5.2731	0.019358	0.078898	0.991255	1203	3	5.2731
Vgll1	4	0.85834	0.86339	0.992919	16762	0	3.1543	0.019375	0.079131	0.991255	1204	2	3.1543
Susd3	3	0.81574	0.82456	0.992919	15916	0	6.9683	0.01941	0.069346	0.991255	1205	2	6.9683
Vps37d	4	0.98053	0.97311	0.994432	18952	0	4.0103	0.019469	0.079131	0.991255	1206	4	4.0103
Phf19	4	0.18084	0.3552	0.992919	5599	1	4.0148	0.019502	0.079131	0.991255	1207	3	4.0148
Ddit4	4	0.98049	0.97311	0.994432	18951	0	3.5275	0.019509	0.079131	0.991255	1208	4	3.5275
Actn4	4	0.97371	0.96528	0.993135	18833	0	5.6215	0.019562	0.079132	0.991255	1209	4	5.6215
Mns1	4	0.59619	0.66656	0.992919	12111	1	4.8506	0.019572	0.079132	0.991255	1210	3	4.8506
Map4k4	4	0.19714	0.37939	0.992919	5975	1	1.6878	0.01965	0.079132	0.991255	1211	3	1.6878
Ppp1r27	4	0.02366	0.094679	0.992919	1161	1	-0.12353	0.019705	0.07991	0.991255	1212	1	-0.12353
Sucla2	4	0.20853	0.39088	0.992919	6231	2	2.0876	0.019713	0.07991	0.991255	1213	2	2.0876
Cdsn	4	0.011758	0.051626	0.992919	658	1	3.8148	0.019722	0.07991	0.991255	1214	2	3.8148
Gabarapl2	4	0.98027	0.97311	0.994432	18950	0	3.5317	0.019733	0.07991	0.991255	1215	4	3.5317
Slc35b2	4	0.6408	0.69604	0.992919	12834	1	5.0322	0.019746	0.07991	0.991255	1216	3	5.0322
Cd200r4	3	0.98025	0.96683	0.993465	18949	0	4.1532	0.019747	0.06991	0.991255	1217	3	4.1532
Clpsl2	4	0.98024	0.97311	0.994432	18948	0	4.2119	0.019756	0.07991	0.991255	1218	4	4.2119
Pth2r	4	0.2191	0.40002	0.992919	6460	1	0.030451	0.01976	0.07991	0.991255	1219	1	0.030451
Pold4	3	0.98021	0.96683	0.993465	18947	0	2.8855	0.019791	0.06991	0.991255	1220	3	2.8855
Il22	4	0.6584	0.70675	0.992919	13103	1	6.1372	0.019803	0.079911	0.991255	1221	3	6.1372
Asap3	4	0.17452	0.34006	0.992919	5470	1	4.2661	0.019815	0.079911	0.991255	1222	3	4.2661
Gm4894	4	0.31093	0.48747	0.992919	8264	2	3.1943	0.019819	0.079911	0.991255	1223	2	3.1943
Mc4r	4	0.45806	0.57577	0.992919	10313	1	4.6935	0.019843	0.080399	0.991255	1224	3	4.6935
Ndst1	3	0.71545	0.72889	0.992919	13999	0	0.34833	0.019866	0.070169	0.991255	1225	2	0.34833
Disp2	4	0.77449	0.78678	0.992919	15108	0	4.9789	0.019874	0.080399	0.991255	1226	3	4.9789
Vmn1r188	4	0.98012	0.97284	0.994432	18946	0	2.7975	0.019882	0.080399	0.991255	1227	4	2.7975
Fancg	2	0.98008	0.97247	0.994432	18945	0	7.0633	0.019915	0.043105	0.991255	1228	2	7.0633
Pafah1b1	1	0.98004	0.98137	0.995623	18944	0	9.627	0.019957	0.018629	0.991255	1229	1	9.627
Emx1	4	0.20052	0.38336	0.992919	6049	1	4.7288	0.01997	0.08063	0.991255	1230	3	4.7288
4921517D22Rik	3	0.9538	0.93866	0.992919	18509	0	6.1628	0.019993	0.070471	0.991255	1231	3	6.1628
4932414N04Rik	4	0.44306	0.56915	0.992919	10139	1	4.8751	0.020002	0.08063	0.991255	1232	3	4.8751
Cwh43	4	0.94368	0.9472	0.992919	18311	0	5.7718	0.020024	0.08063	0.991255	1233	3	5.7718
Mtfmt	4	0.91069	0.91899	0.992919	17693	0	0.79842	0.020035	0.08063	0.991255	1234	2	0.79842
E330034G19Rik	4	0.80989	0.82265	0.992919	15780	0	4.518	0.020068	0.080631	0.991255	1235	3	4.518
Kcnk2	4	0.8742	0.87497	0.992919	17044	0	5.797	0.020081	0.080631	0.991255	1236	3	5.797
Ang4	4	0.97988	0.97256	0.994432	18943	0	2.6973	0.02012	0.080631	0.991255	1237	4	2.6973
Spin4	4	0.89986	0.90601	0.992919	17483	0	5.0402	0.020144	0.080631	0.991255	1238	3	5.0402
Gcc2	4	0.72533	0.74751	0.992919	14185	1	5.6649	0.020158	0.080631	0.991255	1239	3	5.6649
Kiz	4	0.51808	0.61049	0.992919	11019	1	3.783	0.020193	0.080868	0.991255	1240	3	3.783
Anks6	4	0.18698	0.36354	0.992919	5745	1	4.7797	0.020197	0.080868	0.991255	1241	3	4.7797
Mitf	4	0.9074	0.91414	0.992919	17620	0	3.1176	0.0202	0.080868	0.991255	1242	3	3.1176
Olfr303	3	0.25956	0.39052	0.992919	7256	1	6.258	0.020206	0.070471	0.991255	1243	2	6.258
Slc10a4	4	0.85908	0.86339	0.992919	16777	0	4.6955	0.020228	0.080868	0.991255	1244	3	4.6955
Tpx2	3	0.75159	0.7598	0.992919	14698	0	-0.60886	0.020237	0.070471	0.991255	1245	2	-0.60886
Kctd9	4	0.97971	0.97227	0.994432	18941	0	4.6564	0.020288	0.080868	0.991255	1246	4	4.6564
Cst10	4	0.97971	0.97227	0.994432	18942	0	4.5419	0.020288	0.080868	0.991255	1247	4	4.5419
Gnas	4	0.81099	0.82431	0.992919	15818	0	3.0813	0.020301	0.080868	0.991255	1248	2	3.0813
Rnase13	4	0.020956	0.08602	0.992919	1048	3	-1.2797	0.02031	0.080868	0.991255	1249	1	-1.2797
Tmem82	4	0.6074	0.67671	0.992919	12327	1	5.3394	0.020313	0.080868	0.991255	1250	3	5.3394
Rnf186	4	0.95954	0.95692	0.992919	18616	0	4.9461	0.020317	0.080868	0.991255	1251	4	4.9461
Nphs2	4	0.97966	0.97227	0.994432	18939	0	4.0264	0.020336	0.080868	0.991255	1252	4	4.0264
Rita1	4	0.97966	0.97227	0.994432	18938	0	1.3329	0.020345	0.080868	0.991255	1253	4	1.3329
Mrpl47	3	0.378	0.46104	0.992919	9429	1	0.67146	0.020361	0.070471	0.991255	1254	1	0.67146
Fam174a	4	0.94628	0.94853	0.992919	18362	0	4.8646	0.02038	0.083865	0.991255	1255	4	4.8646
Brk1	4	0.78025	0.79193	0.992919	15223	0	2.8694	0.020462	0.084364	0.991255	1256	2	2.8694
Dmtf1	4	0.036697	0.11841	0.992919	1670	3	-1.6848	0.020475	0.084364	0.991255	1257	1	-1.6848
Pet100	3	0.60042	0.62807	0.992919	12167	1	1.0769	0.020485	0.070471	0.991255	1258	2	1.0769
4930558K02Rik	4	0.73662	0.75747	0.992919	14404	1	2.7783	0.020507	0.084364	0.991255	1259	2	2.7783
Pcsk7	4	0.86047	0.86518	0.992919	16798	0	4.6159	0.020525	0.084635	0.991255	1260	3	4.6159
Ccdc34	4	0.97943	0.97197	0.994432	18936	0	4.1505	0.020571	0.084635	0.991255	1261	4	4.1505
Nme8	4	0.97942	0.97197	0.994432	18935	0	5.772	0.02058	0.084635	0.991255	1262	4	5.772
Fastkd3	4	0.19482	0.37562	0.992919	5916	2	0.16935	0.020585	0.084635	0.991255	1263	2	0.16935
Rhoj	4	0.95796	0.95577	0.992919	18590	0	4.2865	0.020596	0.084635	0.991255	1264	4	4.2865
Rbmx	4	0.14923	0.29701	0.992919	4926	1	3.328	0.02064	0.084635	0.991255	1265	3	3.328
Skint2	3	0.97936	0.96554	0.993276	18934	0	6.513	0.02064	0.071445	0.991255	1266	3	6.513
Zzef1	3	0.48418	0.54616	0.992919	10614	1	0.45237	0.020651	0.071445	0.991255	1267	2	0.45237
Etl4	4	0.97934	0.97197	0.994432	18933	0	2.2637	0.020656	0.084635	0.991255	1268	4	2.2637
Fmod	4	0.044282	0.13122	0.992919	1946	1	5.2036	0.020663	0.084635	0.991255	1269	3	5.2036
Kirrel	4	0.97931	0.97197	0.994432	18932	0	2.4993	0.02069	0.085187	0.991255	1270	4	2.4993
Esco2	4	0.10337	0.24155	0.992919	3856	2	2.3826	0.020695	0.085187	0.991255	1271	2	2.3826
Olfr74	4	0.79193	0.80569	0.992919	15453	0	3.92	0.020697	0.085187	0.991255	1272	3	3.92
Ints5	2	0.79651	0.79067	0.992919	15537	0	5.8167	0.020707	0.043797	0.991255	1273	2	5.8167
Olfr1196	4	0.97929	0.97197	0.994432	18931	0	1.2539	0.020708	0.085187	0.991255	1274	4	1.2539
Olfr944	4	0.89521	0.90127	0.992919	17403	0	4.7443	0.020754	0.085754	0.991255	1275	3	4.7443
Olfr111	4	0.30231	0.47656	0.992919	8114	2	3.0665	0.020805	0.085984	0.991255	1276	2	3.0665
Vmn2r63	3	0.66165	0.67789	0.992919	13149	1	-0.50706	0.020816	0.071745	0.991255	1277	1	-0.50706
1600014C23Rik	4	0.7449	0.76017	0.992919	14574	1	5.233	0.020826	0.085984	0.991255	1278	3	5.233
Sh3rf1	4	0.97914	0.97168	0.994432	18930	0	3.0501	0.020862	0.085984	0.991255	1279	4	3.0501
Slc11a2	4	0.88237	0.88387	0.992919	17183	0	4.2255	0.020863	0.085984	0.991255	1280	3	4.2255
Spag11a	4	0.73503	0.75548	0.992919	14374	1	5.2933	0.020876	0.085984	0.991255	1281	3	5.2933
Bcl6b	4	0.97909	0.97168	0.994432	18929	0	2.4167	0.020913	0.085984	0.991255	1282	4	2.4167
Ltv1	3	0.97908	0.9652	0.993135	18928	0	3.2533	0.020918	0.071746	0.991255	1283	3	3.2533
Otos	4	0.61341	0.68269	0.992919	12408	1	4.9822	0.020931	0.085984	0.991255	1284	3	4.9822
Pfkp	4	0.60374	0.67337	0.992919	12264	1	4.134	0.020945	0.085984	0.991255	1285	3	4.134
Osbpl2	4	0.85318	0.8586	0.992919	16659	0	2.9019	0.020969	0.085984	0.991255	1286	2	2.9019
Ppp1r21	4	0.71036	0.73757	0.992919	13930	1	3.1861	0.021005	0.085984	0.991255	1287	2	3.1861
Harbi1	4	0.23115	0.41573	0.992919	6708	2	-0.97496	0.021024	0.085984	0.991255	1288	1	-0.97496
Olfr196	4	0.97895	0.97139	0.994432	18925	0	2.5646	0.021055	0.086209	0.991255	1289	4	2.5646
4930523C07Rik	4	0.035732	0.11568	0.992919	1643	2	-0.29159	0.021079	0.08621	0.991255	1290	2	-0.29159
Arid1a	4	0.81878	0.82764	0.992919	15973	0	4.387	0.021082	0.08621	0.991255	1291	3	4.387
Olfr566	4	0.66823	0.71345	0.992919	13248	1	5.0765	0.021086	0.08621	0.991255	1292	3	5.0765
Fos	4	0.69933	0.73086	0.992919	13747	1	5.2564	0.021091	0.08621	0.991255	1293	3	5.2564
Rnf144a	4	0.12314	0.26166	0.992919	4313	1	3.4575	0.021096	0.08621	0.991255	1294	2	3.4575
Resp18	4	0.97885	0.97108	0.994432	18923	0	2.1738	0.02115	0.089692	0.991255	1295	4	2.1738
Adam24	4	0.25654	0.43204	0.992919	7187	2	3.4113	0.021151	0.089692	0.991255	1296	2	3.4113
Olfr742	4	0.40144	0.54907	0.992919	9683	1	4.1681	0.021189	0.090704	0.991255	1297	3	4.1681
Fbxo40	4	0.97878	0.97078	0.994356	18922	0	2.6165	0.021216	0.090704	0.991255	1298	4	2.6165
Vps41	3	0.97878	0.96485	0.993065	18921	0	3.9619	0.021225	0.072476	0.991255	1299	3	3.9619
Pdgfc	4	0.30757	0.48225	0.992919	8200	2	2.0006	0.021354	0.091498	0.991255	1300	2	2.0006
Gabrg2	4	0.97864	0.9705	0.994163	18920	0	3.2184	0.021362	0.091498	0.991255	1301	4	3.2184
Psip1	4	0.86191	0.86699	0.992919	16829	0	3.8389	0.021371	0.091498	0.991255	1302	2	3.8389
Zfp37	4	0.82067	0.82873	0.992919	16009	0	3.8691	0.021398	0.091758	0.991255	1303	3	3.8691
Mast2	4	0.97856	0.9705	0.994163	18919	0	4.0462	0.021437	0.092077	0.991255	1304	4	4.0462
Sncg	4	0.97855	0.9705	0.994163	18918	0	4.777	0.021449	0.092077	0.991255	1305	4	4.777
Olfr777	4	0.08056	0.2028	0.992919	3221	2	-2.0883	0.021464	0.092077	0.991255	1306	1	-2.0883
Ift74	3	0.97853	0.96485	0.993065	18917	0	2.1453	0.021467	0.073776	0.991255	1307	3	2.1453
Trpc2	4	0.9785	0.9705	0.994163	18916	0	1.3861	0.021496	0.092077	0.991255	1308	4	1.3861
Pdia3	4	0.50175	0.59582	0.992919	10801	1	4.097	0.021519	0.092077	0.991255	1309	3	4.097
Rassf2	4	0.78123	0.7932	0.992919	15243	0	1.5796	0.021574	0.092078	0.991255	1310	3	1.5796
Rragc	4	0.97842	0.9705	0.994163	18915	0	1.5805	0.021578	0.092078	0.991255	1311	4	1.5805
Cdc42bpb	4	0.073467	0.18828	0.992919	2980	2	-0.67217	0.021629	0.092556	0.991255	1312	1	-0.67217
Efna1	4	0.97837	0.9705	0.994163	18913	0	1.4856	0.021631	0.092556	0.991255	1313	4	1.4856
Zfp846	4	0.97834	0.9705	0.994163	18911	0	3.6891	0.021657	0.092842	0.991255	1314	4	3.6891
Palm	4	0.96013	0.95692	0.992919	18624	0	4.3102	0.021683	0.092842	0.991255	1315	4	4.3102
Lbh	4	0.099039	0.23182	0.992919	3748	2	2.5848	0.021684	0.092842	0.991255	1316	2	2.5848
Olfr736	4	0.14532	0.2901	0.992919	4833	1	4.3821	0.0217	0.092842	0.991255	1317	3	4.3821
AU022751	4	0.9576	0.95577	0.992919	18582	0	5.5936	0.02172	0.092842	0.991255	1318	4	5.5936
Igsf23	4	0.97824	0.9705	0.994163	18910	0	1.6174	0.021761	0.092843	0.991255	1319	4	1.6174
Pkn3	4	0.46707	0.58117	0.992919	10419	1	0.37275	0.021794	0.092843	0.991255	1320	2	0.37275
Zfp91	3	0.9782	0.96418	0.992919	18909	0	2.7147	0.021805	0.074357	0.991255	1321	3	2.7147
Fbn2	4	0.47022	0.58117	0.992919	10451	1	4.9888	0.021812	0.092843	0.991255	1322	3	4.9888
Auh	4	0.70313	0.73358	0.992919	13807	1	4.0674	0.021831	0.093137	0.991255	1323	2	4.0674
Mau2	2	0.50416	0.52283	0.992919	10829	1	4.2285	0.02184	0.045158	0.991255	1324	1	4.2285
2610002J02Rik	4	0.023056	0.094095	0.992919	1136	1	3.3475	0.02185	0.093137	0.991255	1325	3	3.3475
Gm2927	2	0.74054	0.75503	0.992919	14481	0	5.621	0.021895	0.045158	0.991255	1326	1	5.621
Prss35	4	0.9781	0.9705	0.994163	18907	0	1.4556	0.021902	0.093138	0.991255	1327	4	1.4556
Il2rg	4	0.71845	0.74291	0.992919	14052	1	4.6658	0.021906	0.093138	0.991255	1328	3	4.6658
2010003K11Rik	4	0.97806	0.9705	0.994163	18906	0	3.4915	0.021939	0.093937	0.991255	1329	4	3.4915
Cwc22	3	0.97805	0.96386	0.992919	18905	0	4.8379	0.021946	0.074641	0.991255	1330	3	4.8379
Mras	4	0.24895	0.42716	0.992919	7050	2	-1.1535	0.021958	0.093937	0.991255	1331	1	-1.1535
Rab3b	4	0.97803	0.9705	0.994163	18904	0	1.6345	0.02197	0.093938	0.991255	1332	4	1.6345
Lrrc56	4	0.94191	0.94674	0.992919	18276	0	4.2996	0.02198	0.093938	0.991255	1333	3	4.2996
Uggt1	4	0.66137	0.70876	0.992919	13141	1	3.6027	0.021989	0.094252	0.991255	1334	2	3.6027
Olfr114	4	0.97801	0.9705	0.994163	18903	0	2.5576	0.021993	0.094252	0.991255	1335	4	2.5576
Bbx	4	0.60508	0.67472	0.992919	12286	1	3.5812	0.022008	0.094252	0.991255	1336	2	3.5812
Phip	4	0.2765	0.4595	0.992919	7577	1	1.6883	0.022013	0.094252	0.991255	1337	3	1.6883
Azin1	4	0.97797	0.9705	0.994163	18902	0	3.3185	0.022031	0.094252	0.991255	1338	4	3.3185
Ppapdc2	4	0.7157	0.74026	0.992919	14004	1	4.4826	0.022047	0.094252	0.991255	1339	3	4.4826
Olfr710	4	0.18267	0.35896	0.992919	5647	1	2.2269	0.022068	0.094252	0.991255	1340	2	2.2269
Olfr430	3	0.12219	0.23939	0.992919	4290	2	-0.89068	0.022095	0.074923	0.991255	1341	1	-0.89068
Vmn1r14	4	0.62373	0.69075	0.992919	12544	1	0.10639	0.022123	0.094252	0.991255	1342	1	0.10639
Gm13043	4	0.22553	0.41224	0.992919	6600	1	4.9422	0.022169	0.094775	0.991255	1343	3	4.9422
Chrd	4	0.050743	0.14177	0.992919	2189	2	2.3184	0.022233	0.095096	0.991255	1344	2	2.3184
Mib2	4	0.45701	0.57577	0.992919	10304	1	5.5201	0.022249	0.095096	0.991255	1345	3	5.5201
Col6a1	4	0.9777	0.9705	0.994163	18898	0	1.6043	0.022301	0.095096	0.991255	1346	4	1.6043
Slc22a3	3	0.97767	0.96352	0.992919	18897	0	1.6394	0.022332	0.074923	0.991255	1347	3	1.6394
Rtp1	4	0.61707	0.68665	0.992919	12457	1	3.8847	0.022343	0.095096	0.991255	1348	3	3.8847
Nrp2	4	0.8009	0.81977	0.992919	15625	0	4.798	0.022368	0.095096	0.991255	1349	3	4.798
Maoa	4	0.16768	0.32673	0.992919	5341	2	1.4249	0.022398	0.09533	0.991255	1350	2	1.4249
Cpq	4	0.46249	0.57847	0.992919	10369	1	3.8955	0.022446	0.09533	0.991255	1351	3	3.8955
Zmym1	4	0.22946	0.41324	0.992919	6670	1	0.47471	0.022453	0.09533	0.991255	1352	2	0.47471
Wfdc18	3	0.88976	0.89464	0.992919	17324	0	2.2518	0.022508	0.075949	0.991255	1353	3	2.2518
Myo1c	4	0.83261	0.84368	0.992919	16266	0	5.0056	0.022531	0.095548	0.991255	1354	3	5.0056
Tfr2	4	0.97745	0.96992	0.994163	18896	0	3.1315	0.022553	0.095548	0.991255	1355	4	3.1315
Wnt8a	4	0.61495	0.68532	0.992919	12424	1	2.7174	0.022562	0.095548	0.991255	1356	3	2.7174
Ltn1	3	0.97743	0.96284	0.992919	18895	0	2.4374	0.022569	0.076396	0.991255	1357	3	2.4374
Sos1	4	0.97742	0.96963	0.994163	18894	0	2.5758	0.022576	0.095762	0.991255	1358	4	2.5758
Spata31	4	0.97741	0.96963	0.994163	18893	0	4.1147	0.022589	0.095762	0.991255	1359	4	4.1147
Snai3	4	0.059312	0.15456	0.992919	2503	3	-1.7078	0.022617	0.096071	0.991255	1360	1	-1.7078
Znrf3	4	0.97738	0.96963	0.994163	18892	0	1.3673	0.022618	0.096071	0.991255	1361	4	1.3673
Olfr738	4	0.92041	0.92976	0.992919	17889	0	3.8801	0.022634	0.096071	0.991255	1362	3	3.8801
Eid2b	4	0.92241	0.93032	0.992919	17935	0	3.5184	0.022653	0.096072	0.991255	1363	2	3.5184
Tmem158	4	0.12084	0.26088	0.992919	4260	1	4.4261	0.022672	0.096072	0.991255	1364	3	4.4261
Vmn1r45	4	0.97731	0.96933	0.994163	18891	0	3.653	0.02269	0.096298	0.991255	1365	4	3.653
Actg2	4	0.79697	0.81458	0.992919	15547	0	5.3747	0.022716	0.096824	0.991255	1366	3	5.3747
Hmgn1	4	0.62783	0.69341	0.992919	12605	1	1.6696	0.022727	0.096824	0.991255	1367	3	1.6696
Malt1	4	0.87553	0.87843	0.992919	17065	0	4.2134	0.022729	0.096824	0.991255	1368	3	4.2134
Defb23	3	0.94011	0.92522	0.992919	18246	0	4.3416	0.022756	0.076396	0.991255	1369	3	4.3416
Vmn1r237	4	0.97724	0.96873	0.993889	18890	0	3.0844	0.022765	0.097053	0.991255	1370	4	3.0844
Arhgef37	4	0.97723	0.96873	0.993889	18889	0	1.2431	0.022768	0.097053	0.991255	1371	4	1.2431
Stap2	4	0.79144	0.80445	0.992919	15442	0	0.64001	0.022782	0.097053	0.991255	1372	2	0.64001
9330159F19Rik	4	0.61511	0.68532	0.992919	12428	1	4.3061	0.022785	0.097053	0.991255	1373	3	4.3061
Vmn1r211	4	0.80989	0.82265	0.992919	15782	0	4.7244	0.022812	0.097787	0.991255	1374	3	4.7244
Sorbs3	4	0.74259	0.75882	0.992919	14520	1	5.6125	0.02287	0.097788	0.991255	1375	3	5.6125
Erich4	4	0.068394	0.1773	0.992919	2814	2	0.36514	0.022892	0.097788	0.991255	1376	2	0.36514
Cdcp1	4	0.9771	0.96844	0.993699	18888	0	3.9576	0.022896	0.097788	0.991255	1377	4	3.9576
Mid1	4	0.028204	0.10098	0.992919	1357	1	0.41143	0.023001	0.098594	0.991255	1378	2	0.41143
Nrip3	4	0.97584	0.9672	0.993465	18861	0	5.3676	0.023005	0.098594	0.991255	1379	4	5.3676
Trmu	4	0.51142	0.6032	0.992919	10926	1	5.3138	0.023024	0.0989	0.991255	1380	3	5.3138
Aqp2	4	0.65478	0.70404	0.992919	13042	1	5.1304	0.023029	0.0989	0.991255	1381	3	5.1304
Sptssb	4	0.32516	0.49529	0.992919	8561	1	3.128	0.023056	0.0989	0.991255	1382	3	3.128
Gfpt1	3	0.45584	0.52852	0.992919	10289	1	0.12421	0.023085	0.076816	0.991255	1383	1	0.12421
Foxp2	4	0.5	0.59582	0.992919	10787	1	4.6756	0.023111	0.098901	0.991255	1384	3	4.6756
Cybrd1	3	0.97688	0.96284	0.992919	18887	0	5.8357	0.023118	0.07729	0.991255	1385	3	5.8357
Tpgs1	4	0.1228	0.26127	0.992919	4307	2	2.8923	0.023164	0.099112	0.991255	1386	2	2.8923
Psph	4	0.11122	0.24526	0.992919	4032	2	0.43621	0.023166	0.099112	0.991255	1387	2	0.43621
Yaf2	4	0.97683	0.96816	0.993465	18886	0	1.3163	0.02317	0.099112	0.991255	1388	4	1.3163
Rufy2	3	0.84318	0.85919	0.992919	16476	0	6.7991	0.023178	0.07729	0.991255	1389	2	6.7991
Doxl2	3	0.97679	0.96284	0.992919	18884	0	6.4537	0.023212	0.07729	0.991255	1390	3	6.4537
Epb4.1l3	3	0.97679	0.96284	0.992919	18885	0	5.7427	0.023212	0.07729	0.991255	1391	3	5.7427
Pithd1	4	0.97673	0.96816	0.993465	18882	0	1.9099	0.023275	0.099625	0.991255	1392	4	1.9099
Loxl3	4	0.84214	0.84981	0.992919	16457	0	0.65159	0.023276	0.099625	0.991255	1393	3	0.65159
Pde7a	4	0.13428	0.2768	0.992919	4565	2	3.1946	0.023288	0.099625	0.991255	1394	2	3.1946
Crem	4	0.9767	0.96816	0.993465	18881	0	1.9913	0.0233	0.099625	0.991255	1395	4	1.9913
Agpat9	4	0.66788	0.71211	0.992919	13241	1	4.387	0.02331	0.099625	0.991255	1396	3	4.387
Vmn2r70	3	0.5682	0.61218	0.992919	11695	1	6.3366	0.023358	0.077577	0.991255	1397	2	6.3366
Gm10354	2	0.97663	0.96887	0.99398	18880	0	6.0213	0.023367	0.046505	0.991255	1398	2	6.0213
Olfr1472	4	0.62844	0.69341	0.992919	12619	1	4.1352	0.023383	0.099625	0.991255	1399	3	4.1352
Gal3st4	4	0.04555	0.13122	0.992919	2001	1	2.1178	0.023386	0.099625	0.991255	1400	3	2.1178
Slc45a1	4	0.90776	0.91448	0.992919	17628	0	3.637	0.023393	0.099625	0.991255	1401	2	3.637
Pecr	4	0.97659	0.96816	0.993465	18879	0	2.6465	0.023407	0.099625	0.991255	1402	4	2.6465
Ndufv2	2	0.91828	0.88764	0.992919	17835	0	6.5927	0.023413	0.046847	0.991255	1403	2	6.5927
Olfr1138	4	0.57228	0.64791	0.992919	11771	1	5.5813	0.023431	0.099625	0.991255	1404	3	5.5813
Cdip1	4	0.044313	0.13122	0.992919	1948	2	0.089598	0.02344	0.099625	0.991255	1405	2	0.089598
Gal3st3	4	0.82025	0.82764	0.992919	16004	0	5.7	0.023467	0.099625	0.991255	1406	3	5.7
Cxcr4	4	0.017893	0.074872	0.992919	933	3	-1.7789	0.023495	0.099625	0.991255	1407	1	-1.7789
Klf11	4	0.9765	0.96816	0.993465	18878	0	1.8033	0.023504	0.099625	0.991255	1408	4	1.8033
Slc17a2	4	0.9765	0.96816	0.993465	18877	0	2.6573	0.023504	0.099625	0.991255	1409	4	2.6573
2010012O05Rik	4	0.35583	0.52624	0.992919	9147	2	3.3328	0.023527	0.099625	0.991255	1410	2	3.3328
Iqcb1	4	0.97647	0.96816	0.993465	18875	0	2.5781	0.023532	0.099625	0.991255	1411	4	2.5781
Abcb6	4	0.77642	0.78742	0.992919	15147	0	3.2853	0.02355	0.099625	0.991255	1412	3	3.2853
Olfr790	4	0.63943	0.69604	0.992919	12815	1	4.9052	0.023579	0.099625	0.991255	1413	3	4.9052
Hoxa11	4	0.97638	0.96784	0.993465	18874	0	2.7635	0.023621	0.099877	0.991255	1414	4	2.7635
Phactr1	4	0.6037	0.67337	0.992919	12263	1	4.6578	0.023623	0.099877	0.991255	1415	3	4.6578
Selt	4	0.92193	0.92976	0.992919	17927	0	4.2793	0.023671	0.099877	0.991255	1416	3	4.2793
Coq3	3	0.97632	0.96214	0.992919	18873	0	2.5627	0.023684	0.078774	0.991255	1417	3	2.5627
Ube2f	4	0.97629	0.96784	0.993465	18871	0	3.3835	0.023712	0.099877	0.991255	1418	4	3.3835
Zfp11	4	0.41988	0.55836	0.992919	9871	1	3.0473	0.023715	0.099877	0.991255	1419	3	3.0473
Slc25a23	4	0.97627	0.96784	0.993465	18870	0	1.341	0.023729	0.099877	0.991255	1420	4	1.341
Zfp672	4	0.90263	0.90913	0.992919	17529	0	3.7819	0.023748	0.099877	0.991255	1421	2	3.7819
Defb47	4	0.74556	0.76283	0.992919	14583	1	4.3384	0.023767	0.10019	0.991255	1422	3	4.3384
Pmp2	4	0.96445	0.96074	0.992919	18702	0	4.7417	0.023777	0.10019	0.991255	1423	4	4.7417
Eme2	4	0.57113	0.64791	0.992919	11751	1	2.6495	0.023824	0.10072	0.991255	1424	3	2.6495
I830077J02Rik	4	0.23646	0.41823	0.992919	6825	1	2.7799	0.023873	0.10072	0.991255	1425	2	2.7799
Nfatc2	4	0.97613	0.96753	0.993465	18868	0	3.8667	0.023875	0.10072	0.991255	1426	4	3.8667
Itgb2l	4	0.97612	0.96753	0.993465	18867	0	3.118	0.023881	0.10072	0.991255	1427	4	3.118
Gdf7	4	0.41979	0.5577	0.992919	9870	1	2.8641	0.023934	0.10098	0.991255	1428	3	2.8641
Golga4	4	0.79561	0.81281	0.992919	15526	0	3.3937	0.02395	0.10098	0.991255	1429	3	3.3937
Msto1	2	0.81429	0.80188	0.992919	15887	0	5.0276	0.023965	0.050283	0.991255	1430	2	5.0276
Olfr352	4	0.97601	0.9672	0.993465	18865	0	1.2259	0.023988	0.10098	0.991255	1431	4	1.2259
Olfr980	4	0.67477	0.71884	0.992919	13343	1	0.94527	0.023989	0.10098	0.991255	1432	2	0.94527
Sprr2e	3	0.1069	0.22006	0.992919	3926	2	-1.2098	0.023992	0.07906	0.991255	1433	1	-1.2098
Fibin	4	0.97597	0.9672	0.993465	18864	0	2.0762	0.024034	0.10098	0.991255	1434	4	2.0762
Xntrpc	4	0.78464	0.7932	0.992919	15307	0	4.5255	0.024038	0.10098	0.991255	1435	3	4.5255
Notum	4	0.41543	0.55704	0.992919	9830	1	2.047	0.024044	0.10098	0.991255	1436	3	2.047
Ubtd2	4	0.78025	0.79193	0.992919	15227	0	2.7352	0.024056	0.10098	0.991255	1437	2	2.7352
Serpina3k	4	0.97593	0.9672	0.993465	18863	0	3.301	0.024065	0.10098	0.991255	1438	4	3.301
Dnajc7	3	0.32091	0.42739	0.992919	8469	1	0.32272	0.024075	0.079061	0.991255	1439	2	0.32272
Btg3	3	0.97585	0.96181	0.992919	18862	0	5.5093	0.024153	0.079511	0.991255	1440	3	5.5093
M6pr	4	0.030334	0.10782	0.992919	1439	1	4.7173	0.024153	0.10098	0.991255	1441	3	4.7173
2810474O19Rik	3	0.82022	0.83033	0.992919	16001	0	0.45299	0.024157	0.079511	0.991255	1442	2	0.45299
Csnk2b	2	0.73053	0.74572	0.992919	14275	0	5.5373	0.024158	0.050284	0.991255	1443	1	5.5373
Syne3	4	0.97581	0.9672	0.993465	18859	0	3.2593	0.024195	0.10098	0.991255	1444	4	3.2593
2210018M11Rik	4	0.97579	0.9672	0.993465	18858	0	3.5674	0.024205	0.10098	0.991255	1445	4	3.5674
Cadm1	4	0.97576	0.9672	0.993465	18857	0	3.7519	0.024238	0.10098	0.991255	1446	4	3.7519
Xlr3b	4	0.86353	0.86789	0.992919	16850	0	0.65699	0.024263	0.10098	0.991255	1447	2	0.65699
Gucy2g	4	0.97573	0.9672	0.993465	18856	0	3.7518	0.024269	0.10098	0.991255	1448	4	3.7518
Ube3c	4	0.77814	0.78872	0.992919	15182	0	5.4928	0.024309	0.1013	0.991255	1449	3	5.4928
Abcg4	4	0.076785	0.198	0.992919	3083	2	2.9298	0.024328	0.1013	0.991255	1450	2	2.9298
Atp6v1g2	4	0.86906	0.87014	0.992919	16960	0	1.6505	0.024373	0.1013	0.991255	1451	3	1.6505
Lrig2	4	0.94105	0.94433	0.992919	18260	0	3.9475	0.024416	0.1013	0.991255	1452	3	3.9475
Guca2b	4	0.85285	0.8586	0.992919	16652	0	4.5097	0.024468	0.1013	0.991255	1453	3	4.5097
Tcf19	4	0.52511	0.61447	0.992919	11104	1	5.165	0.024473	0.1013	0.991255	1454	3	5.165
Icos	4	0.1868	0.36354	0.992919	5743	2	3.2268	0.024474	0.1013	0.991255	1455	2	3.2268
Olfr231	4	0.14269	0.2901	0.992919	4765	1	0.086676	0.024482	0.1013	0.991255	1456	2	0.086676
Mc1r	4	0.3714	0.53301	0.992919	9379	1	2.7318	0.024537	0.1013	0.991255	1457	3	2.7318
Smad2	4	0.18288	0.35896	0.992919	5653	2	3.6591	0.024542	0.1013	0.991255	1458	2	3.6591
Sorcs3	4	0.94649	0.9494	0.992919	18364	0	4.7048	0.024563	0.1013	0.991255	1459	4	4.7048
Cramp1l	4	0.78952	0.79832	0.992919	15406	0	4.0225	0.024578	0.1013	0.991255	1460	3	4.0225
Olfr735	4	0.72462	0.74555	0.992919	14179	1	1.8691	0.024592	0.1013	0.991255	1461	3	1.8691
Dnajc4	4	0.78025	0.79193	0.992919	15217	0	5.1357	0.024593	0.1013	0.991255	1462	3	5.1357
Mrps2	2	0.97541	0.96631	0.993276	18855	0	5.5942	0.024595	0.050652	0.991255	1463	2	5.5942
Slc5a8	3	0.7346	0.74693	0.992919	14367	0	2.9366	0.02461	0.081792	0.991255	1464	2	2.9366
Cdh3	4	0.87658	0.87843	0.992919	17084	0	5.0813	0.024684	0.1013	0.991255	1465	3	5.0813
Ttc21a	4	0.13023	0.27435	0.992919	4474	2	-0.12779	0.024702	0.10184	0.991255	1466	2	-0.12779
Cbs	4	0.28237	0.46307	0.992919	7691	2	1.3611	0.024756	0.10184	0.991255	1467	2	1.3611
Vmn1r60	4	0.020033	0.082141	0.992919	1013	2	2.6372	0.024758	0.10184	0.991255	1468	2	2.6372
Fgf1	4	0.24796	0.4234	0.992919	7034	1	0.34844	0.024811	0.10184	0.991255	1469	2	0.34844
Galc	4	0.94283	0.94674	0.992919	18291	0	4.2657	0.024836	0.10184	0.991255	1470	3	4.2657
Adnp2	4	0.31195	0.48801	0.992919	8281	1	4.0909	0.024841	0.10184	0.991255	1471	3	4.0909
Eps8l3	4	0.26353	0.44476	0.992919	7330	1	4.8444	0.024856	0.10184	0.991255	1472	3	4.8444
Gadd45a	4	0.85346	0.8586	0.992919	16663	0	2.1683	0.024866	0.10184	0.991255	1473	2	2.1683
Olfr1347	4	0.68909	0.72831	0.992919	13574	1	4.6326	0.024866	0.10184	0.991255	1474	3	4.6326
Echs1	4	0.021629	0.087436	0.992919	1070	1	2.6494	0.024895	0.10184	0.991255	1475	2	2.6494
Gspt1	3	0.44535	0.51386	0.992919	10160	1	0.43219	0.024899	0.082097	0.991255	1476	1	0.43219
Olfr1271	4	0.13206	0.27515	0.992919	4517	1	1.9439	0.024921	0.10184	0.991255	1477	2	1.9439
Lysmd3	3	0.88254	0.88958	0.992919	17188	0	5.6118	0.024985	0.082567	0.991255	1478	2	5.6118
Olfr1032	4	0.10835	0.24451	0.992919	3962	1	4.2428	0.025023	0.10184	0.991255	1479	3	4.2428
Pard6a	4	0.81661	0.82656	0.992919	15935	0	4.5503	0.025039	0.10184	0.991255	1480	3	4.5503
Olfr583	4	0.97492	0.96639	0.993276	18849	0	3.91	0.02508	0.10246	0.991255	1481	4	3.91
Gm13139	4	0.97492	0.96639	0.993276	18847	0	1.5634	0.02508	0.10246	0.991255	1482	4	1.5634
Olfr1122	4	0.97492	0.96639	0.993276	18844	0	1.2038	0.02508	0.10246	0.991255	1483	4	1.2038
Muc4	4	0.97492	0.96639	0.993276	18841	0	2.9796	0.02508	0.10246	0.991255	1484	4	2.9796
Vmn1r9	4	0.97492	0.96639	0.993276	18852	0	3.7907	0.02508	0.10246	0.991255	1485	4	3.7907
Rp9	4	0.97492	0.96639	0.993276	18843	0	1.3819	0.02508	0.10246	0.991255	1486	4	1.3819
Vmn2r19	4	0.97492	0.96639	0.993276	18851	0	3.3665	0.02508	0.10246	0.991255	1487	4	3.3665
Olfr699	4	0.97492	0.96639	0.993276	18845	0	4.1035	0.02508	0.10246	0.991255	1488	4	4.1035
Prss2	4	0.97492	0.96639	0.993276	18842	0	3.5135	0.02508	0.10246	0.991255	1489	4	3.5135
Nrcam	4	0.97492	0.96639	0.993276	18846	0	2.8772	0.02508	0.10246	0.991255	1490	4	2.8772
Ankrd13d	4	0.97492	0.96639	0.993276	18840	0	1.4181	0.02508	0.10246	0.991255	1491	4	1.4181
Zfp646	4	0.96136	0.95848	0.992919	18651	0	3.0037	0.025085	0.10308	0.991255	1492	4	3.0037
Cryba4	4	0.35213	0.52309	0.992919	9074	1	4.8022	0.025105	0.10308	0.991255	1493	3	4.8022
Sec23b	4	0.58403	0.65592	0.992919	11937	1	3.7455	0.025166	0.10308	0.991255	1494	3	3.7455
Chdh	4	0.67669	0.72021	0.992919	13378	1	5.2466	0.025249	0.10308	0.991255	1495	3	5.2466
Morn1	3	0.97474	0.96038	0.992919	18839	0	6.6801	0.025263	0.082567	0.991255	1496	3	6.6801
4933425L06Rik	4	0.30055	0.47656	0.992919	8074	2	2.7882	0.025304	0.10308	0.991255	1497	2	2.7882
Arpp19	3	0.92569	0.91422	0.992919	18004	0	6.4503	0.025307	0.082567	0.991255	1498	3	6.4503
Epgn	4	0.35518	0.52624	0.992919	9133	1	-0.011423	0.025359	0.10308	0.991255	1499	1	-0.011423
Cyp2b13	4	0.9569	0.95448	0.992919	18571	0	4.6163	0.025369	0.10308	0.991255	1500	4	4.6163
Rnf19b	3	0.85022	0.8642	0.992919	16610	0	5.6965	0.025372	0.083046	0.991255	1501	2	5.6965
Angptl4	4	0.16085	0.31116	0.992919	5181	2	-1.2255	0.025414	0.10308	0.991255	1502	2	-1.2255
Vmn1r201	3	0.12136	0.23814	0.992919	4272	1	6.431	0.025459	0.083046	0.991255	1503	2	6.431
Cep89	4	0.56765	0.64652	0.992919	11692	1	4.8148	0.025464	0.1034	0.991255	1504	3	4.8148
Olfr168	4	0.68988	0.72831	0.992919	13592	1	2.2814	0.025469	0.1034	0.991255	1505	3	2.2814
1700001P01Rik	4	0.18252	0.35896	0.992919	5643	1	1.9141	0.025523	0.10374	0.991255	1506	2	1.9141
Plac1	3	0.42704	0.49773	0.992919	9951	1	1.592	0.025557	0.08354	0.991255	1507	2	1.592
Setdb1	3	0.69821	0.71832	0.992919	13730	0	-0.42909	0.02564	0.083842	0.991255	1508	1	-0.42909
Pcdhb19	4	0.34717	0.51729	0.992919	8986	2	-0.18238	0.025688	0.10374	0.991255	1509	1	-0.18238
Ncoa6	4	0.1482	0.29613	0.992919	4898	1	3.0716	0.025696	0.10374	0.991255	1510	3	3.0716
Odf2l	4	0.56343	0.64382	0.992919	11638	1	4.6635	0.025742	0.10374	0.991255	1511	3	4.6635
Lrrtm2	4	0.34553	0.51729	0.992919	8948	1	3.6904	0.025774	0.10374	0.991255	1512	3	3.6904
Tmem180	4	0.95856	0.95615	0.992919	18599	0	3.7741	0.025846	0.10374	0.991255	1513	4	3.7741
Stxbp1	4	0.74924	0.76819	0.992919	14653	1	1.8299	0.025852	0.10374	0.991255	1514	3	1.8299
Gpr137	4	0.63507	0.69604	0.992919	12735	1	5.3557	0.025856	0.10374	0.991255	1515	3	5.3557
Il22ra2	4	0.95935	0.95692	0.992919	18614	0	5.1689	0.025888	0.10374	0.991255	1516	4	5.1689
Mmp19	4	0.6832	0.72425	0.992919	13474	1	5.4528	0.025906	0.10374	0.991255	1517	3	5.4528
E2f5	4	0.12092	0.26088	0.992919	4261	2	-0.60583	0.025907	0.10374	0.991255	1518	1	-0.60583
Ing4	4	0.831	0.84051	0.992919	16233	0	4.0952	0.025926	0.10374	0.991255	1519	2	4.0952
Ces1c	4	0.21242	0.39458	0.992919	6331	1	5.6994	0.025961	0.10407	0.991255	1520	3	5.6994
Prl7b1	4	0.12066	0.26088	0.992919	4252	2	2.4338	0.025961	0.10407	0.991255	1521	2	2.4338
Xylb	4	0.76893	0.77892	0.992919	14992	1	3.9365	0.026006	0.10407	0.991255	1522	3	3.9365
Pou2f3	4	0.034813	0.11548	0.992919	1606	3	-1.3956	0.026016	0.10407	0.991255	1523	1	-1.3956
Acsm3	4	0.95564	0.95369	0.992919	18547	0	5.4772	0.026044	0.10407	0.991255	1524	4	5.4772
Snd1	4	0.81187	0.82431	0.992919	15835	0	3.8269	0.026046	0.10407	0.991255	1525	3	3.8269
Ube2e3	4	0.10085	0.2333	0.992919	3788	1	4.8842	0.026056	0.10438	0.991255	1526	3	4.8842
Armcx1	4	0.97394	0.96558	0.993276	18837	0	3.235	0.026064	0.10438	0.991255	1527	4	3.235
Runx3	4	0.3189	0.49274	0.992919	8432	2	-0.24654	0.026071	0.10471	0.991255	1528	1	-0.24654
Fcgr4	4	0.27338	0.45842	0.992919	7523	1	3.9245	0.026126	0.10471	0.991255	1529	3	3.9245
Fancc	4	0.58549	0.65724	0.992919	11950	1	3.6486	0.026127	0.10471	0.991255	1530	2	3.6486
Olfr51	4	0.68919	0.72831	0.992919	13576	1	5.3969	0.026144	0.10493	0.991255	1531	3	5.3969
Rbpms	4	0.55169	0.64116	0.992919	11477	1	5.3742	0.026159	0.10493	0.991255	1532	3	5.3742
Wrb	3	0.97383	0.96002	0.992919	18836	0	2.0879	0.02617	0.083842	0.991255	1533	3	2.0879
Dapk1	4	0.94616	0.94811	0.992919	18359	0	4.0225	0.026177	0.10493	0.991255	1534	4	4.0225
Foxb1	4	0.71398	0.73891	0.992919	13976	1	-0.57174	0.02618	0.10493	0.991255	1535	1	-0.57174
Ikzf4	4	0.036757	0.11841	0.992919	1673	1	4.7401	0.026235	0.10493	0.991255	1536	3	4.7401
Kcnj1	4	0.97376	0.96528	0.993135	18835	0	1.3949	0.026237	0.10493	0.991255	1537	4	1.3949
Tmem242	3	0.97375	0.95965	0.992919	18834	0	2.4901	0.026251	0.084159	0.991255	1538	3	2.4901
Ttyh3	4	0.80989	0.82265	0.992919	15784	0	5.0783	0.026259	0.10543	0.991255	1539	3	5.0783
Cpped1	4	0.053918	0.14765	0.992919	2313	2	-1.6829	0.02629	0.10543	0.991255	1540	2	-1.6829
Acot1	4	0.78025	0.79193	0.992919	15218	0	3.9181	0.02629	0.10543	0.991255	1541	3	3.9181
Defb34	4	0.97369	0.96528	0.993135	18832	0	2.3404	0.026313	0.10543	0.991255	1542	4	2.3404
Sytl1	4	0.97368	0.96528	0.993135	18831	0	3.2328	0.026317	0.10543	0.991255	1543	4	3.2328
Tff1	3	0.97368	0.95965	0.992919	18830	0	1.9012	0.026323	0.08416	0.991255	1544	3	1.9012
Sox1	4	0.97256	0.96427	0.992919	18807	0	5.11	0.026337	0.10543	0.991255	1545	4	5.11
G0s2	4	0.69184	0.72831	0.992919	13639	1	4.8407	0.026338	0.10543	0.991255	1546	3	4.8407
Cmtr2	4	0.36646	0.53036	0.992919	9327	1	1.1194	0.026345	0.10543	0.991255	1547	2	1.1194
Cdhr5	4	0.93484	0.93991	0.992919	18139	0	4.9293	0.026395	0.106	0.991255	1548	3	4.9293
Sec14l4	4	0.97356	0.96528	0.993135	18829	0	1.7974	0.026437	0.106	0.991255	1549	4	1.7974
Tln2	4	0.7795	0.79066	0.992919	15207	0	0.41934	0.026454	0.106	0.991255	1550	2	0.41934
C86695	4	0.93945	0.94267	0.992919	18232	0	4.4409	0.026464	0.10624	0.991255	1551	3	4.4409
Slc44a2	4	0.97353	0.96494	0.993105	18828	0	3.9903	0.026474	0.10624	0.991255	1552	4	3.9903
Olfr1205	4	0.2562	0.43204	0.992919	7179	2	-0.20875	0.026509	0.10704	0.991255	1553	1	-0.20875
Gata4	4	0.97349	0.96461	0.992919	18827	0	1.8871	0.026514	0.10704	0.991255	1554	4	1.8871
Eif4enif1	3	0.55334	0.59898	0.992919	11505	1	0.82405	0.026545	0.084638	0.991255	1555	2	0.82405
Ctag2	4	0.51142	0.6032	0.992919	10927	1	4.0708	0.02658	0.10774	0.991255	1556	3	4.0708
Glp2r	4	0.9734	0.96461	0.992919	18826	0	2.4285	0.026603	0.10774	0.991255	1557	4	2.4285
Rab24	4	0.19801	0.38037	0.992919	5991	1	3.419	0.026621	0.10774	0.991255	1558	2	3.419
Grin2a	4	0.97336	0.96461	0.992919	18825	0	1.2686	0.026636	0.10774	0.991255	1559	4	1.2686
Bbs9	4	0.97336	0.96461	0.992919	18824	0	3.6806	0.026641	0.10774	0.991255	1560	4	3.6806
Tmem39b	4	0.97333	0.96461	0.992919	18823	0	1.7861	0.026667	0.10774	0.991255	1561	4	1.7861
Gpr149	4	0.97331	0.96461	0.992919	18822	0	1.1306	0.026695	0.10774	0.991255	1562	4	1.1306
Gbp4	3	0.53592	0.58722	0.992919	11238	1	5.1674	0.02671	0.084638	0.991255	1563	2	5.1674
Sycp1	4	0.30865	0.48225	0.992919	8233	1	4.0829	0.026712	0.10774	0.991255	1564	3	4.0829
Serpinb9d	4	0.44463	0.57179	0.992919	10156	1	4.8658	0.026712	0.10774	0.991255	1565	3	4.8658
Clip4	4	0.11078	0.24526	0.992919	4020	2	-0.71086	0.026728	0.10774	0.991255	1566	1	-0.71086
Esam	4	0.97326	0.96461	0.992919	18821	0	2.9996	0.026741	0.10774	0.991255	1567	4	2.9996
Stxbp2	4	0.76782	0.77892	0.992919	14969	1	3.6892	0.026752	0.10774	0.991255	1568	3	3.6892
Lemd2	4	0.22846	0.41274	0.992919	6656	2	2.8064	0.026763	0.10774	0.991255	1569	2	2.8064
Cdh10	4	0.65478	0.70404	0.992919	13043	1	4.3111	0.026771	0.10774	0.991255	1570	3	4.3111
Fyb	4	0.95489	0.95284	0.992919	18533	0	3.392	0.026782	0.108	0.991255	1571	4	3.392
Dtx1	4	0.33924	0.51363	0.992919	8830	2	3.3638	0.026813	0.108	0.991255	1572	2	3.3638
D5Ertd579e	3	0.33013	0.43477	0.992919	8652	1	-0.099641	0.026833	0.084943	0.991255	1573	1	-0.099641
Olfr1502	4	0.87169	0.87364	0.992919	16990	0	2.2907	0.026837	0.108	0.991255	1574	3	2.2907
Kcmf1	4	0.9541	0.95243	0.992919	18513	0	3.3723	0.026861	0.10834	0.991255	1575	4	3.3723
Baat	3	0.97313	0.95929	0.992919	18819	0	3.4661	0.026866	0.084943	0.991255	1576	3	3.4661
Calb2	4	0.56917	0.64652	0.992919	11730	1	3.8514	0.026877	0.10889	0.991255	1577	3	3.8514
Kif1a	3	0.97311	0.95929	0.992919	18818	0	4.3384	0.026885	0.084943	0.991255	1578	3	4.3384
Eif2b3	1	0.9731	0.97514	0.994432	18817	0	9.0558	0.026895	0.024857	0.991255	1579	1	9.0558
Ptgfr	4	0.94507	0.94766	0.992919	18334	0	3.9196	0.026915	0.10889	0.991255	1580	4	3.9196
Faim	4	0.97308	0.96427	0.992919	18816	0	2.4147	0.026924	0.10889	0.991255	1581	4	2.4147
Map1lc3b	4	0.02377	0.094679	0.992919	1166	1	2.9159	0.026947	0.10889	0.991255	1582	3	2.9159
Mtm1	4	0.51711	0.60915	0.992919	11002	1	4.4117	0.026989	0.10889	0.991255	1583	3	4.4117
Ahsa2	4	0.79172	0.80569	0.992919	15448	0	0.54364	0.027001	0.10889	0.991255	1584	2	0.54364
Fkbp7	4	0.50603	0.59986	0.992919	10852	1	3.2942	0.027027	0.10889	0.991255	1585	3	3.2942
Ikbkg	4	0.97295	0.96427	0.992919	18815	0	1.6153	0.02705	0.10889	0.991255	1586	4	1.6153
Add2	4	0.5473	0.63454	0.992919	11416	1	4.6074	0.027064	0.10889	0.991255	1587	3	4.6074
Ttbk2	4	0.87458	0.87497	0.992919	17052	0	5.6559	0.02709	0.10889	0.991255	1588	3	5.6559
Figla	4	0.13885	0.28923	0.992919	4673	1	4.2415	0.027138	0.10889	0.991255	1589	3	4.2415
Zbtb43	4	0.97285	0.96427	0.992919	18814	0	4.1462	0.027151	0.10889	0.991255	1590	4	4.1462
C1qtnf9	4	0.94844	0.94982	0.992919	18406	0	4.3518	0.02716	0.10889	0.991255	1591	4	4.3518
Scly	4	0.5703	0.64791	0.992919	11741	1	4.4855	0.0272	0.10889	0.991255	1592	3	4.4855
Aaed1	4	0.9728	0.96427	0.992919	18813	0	1.7151	0.027202	0.10889	0.991255	1593	4	1.7151
Higd1c	4	0.9402	0.94387	0.992919	18247	0	4.172	0.027267	0.10921	0.991255	1594	3	4.172
Papd7	4	0.7331	0.75482	0.992919	14331	1	4.5593	0.027272	0.10921	0.991255	1595	3	4.5593
Hemgn	4	0.41017	0.55443	0.992919	9770	1	0.62675	0.027275	0.10921	0.991255	1596	2	0.62675
Asb6	4	0.97268	0.96427	0.992919	18812	0	3.0018	0.02732	0.10921	0.991255	1597	4	3.0018
Tdh	4	0.97268	0.96427	0.992919	18811	0	2.42	0.027323	0.10921	0.991255	1598	4	2.42
Agpat6	4	0.97267	0.96427	0.992919	18810	0	1.6922	0.027327	0.10921	0.991255	1599	4	1.6922
Casp9	4	0.85455	0.86049	0.992919	16685	0	2.4724	0.027329	0.10921	0.991255	1600	2	2.4724
4833427G06Rik	4	0.93776	0.94241	0.992919	18212	0	4.6669	0.027369	0.10921	0.991255	1601	3	4.6669
Pnrc2	4	0.8601	0.86427	0.992919	16791	0	5.0837	0.02738	0.10921	0.991255	1602	3	5.0837
Amz2	4	0.90677	0.91313	0.992919	17611	0	0.62661	0.027384	0.10921	0.991255	1603	3	0.62661
Dhrs3	4	0.41886	0.55704	0.992919	9862	1	4.8506	0.027401	0.10921	0.991255	1604	3	4.8506
Gga2	3	0.97259	0.95929	0.992919	18809	0	3.5911	0.027407	0.087173	0.991255	1605	3	3.5911
Taf4a	4	0.97258	0.96427	0.992919	18808	0	2.2568	0.027421	0.10921	0.991255	1606	4	2.2568
Aim1l	4	0.25172	0.43094	0.992919	7093	1	3.3487	0.027426	0.10921	0.991255	1607	2	3.3487
Cdk13	4	0.53358	0.61979	0.992919	11206	1	4.0578	0.027455	0.10921	0.991255	1608	3	4.0578
Spint4	4	0.95432	0.95243	0.992919	18517	0	2.105	0.027494	0.10921	0.991255	1609	4	2.105
Tnfrsf12a	4	0.88973	0.89311	0.992919	17322	0	4.3274	0.027515	0.10921	0.991255	1610	3	4.3274
Prl	4	0.62373	0.69075	0.992919	12545	1	4.4764	0.02752	0.10921	0.991255	1611	3	4.4764
Tbc1d2	4	0.22781	0.41224	0.992919	6637	1	0.91068	0.027548	0.10921	0.991255	1612	2	0.91068
Tcf7l1	4	0.74107	0.75882	0.992919	14490	1	3.9547	0.027596	0.10921	0.991255	1613	3	3.9547
Crls1	4	0.62667	0.69275	0.992919	12587	1	1.6005	0.027603	0.10921	0.991255	1614	2	1.6005
Zfp536	4	0.91893	0.92865	0.992919	17852	0	4.2044	0.027612	0.10921	0.991255	1615	3	4.2044
Ypel1	3	0.28833	0.40171	0.992919	7817	1	5.502	0.027635	0.089851	0.991255	1616	2	5.502
Dsp	4	0.77136	0.78025	0.992919	15058	0	3.9199	0.027693	0.10976	0.991255	1617	3	3.9199
Bves	4	0.2911	0.47086	0.992919	7865	2	0.38305	0.027712	0.10976	0.991255	1618	2	0.38305
Zfp52	4	0.65222	0.70404	0.992919	13009	1	4.829	0.027742	0.10976	0.991255	1619	3	4.829
Cisd2	4	0.97222	0.96427	0.992919	18805	0	3.0837	0.027777	0.10976	0.991255	1620	4	3.0837
Olfr1029	3	0.11973	0.23732	0.992919	4225	1	6.3884	0.027816	0.089852	0.991255	1621	2	6.3884
Lpin2	4	0.9581	0.95577	0.992919	18592	0	2.6312	0.027822	0.10976	0.991255	1622	4	2.6312
Mettl21a	4	0.3329	0.5047	0.992919	8702	1	4.7594	0.027851	0.10976	0.991255	1623	3	4.7594
Fermt1	4	0.97207	0.96427	0.992919	18804	0	1.1976	0.027929	0.10976	0.991255	1624	4	1.1976
Tubal3	4	0.47535	0.58252	0.992919	10511	1	4.965	0.027931	0.10976	0.991255	1625	3	4.965
Rassf8	4	0.97205	0.96427	0.992919	18803	0	1.9856	0.027948	0.10976	0.991255	1626	4	1.9856
Poglut1	4	0.63909	0.69604	0.992919	12811	1	4.6654	0.027954	0.10976	0.991255	1627	3	4.6654
Ica1	4	0.24121	0.42133	0.992919	6898	2	-0.97755	0.027986	0.10976	0.991255	1628	1	-0.97755
Ptges3l	4	0.44342	0.56915	0.992919	10144	1	2.8671	0.028003	0.10976	0.991255	1629	3	2.8671
Ptpn7	4	0.51355	0.60786	0.992919	10952	1	3.7802	0.028003	0.10976	0.991255	1630	3	3.7802
Cdc34	4	0.89986	0.90601	0.992919	17494	0	1.2817	0.02804	0.10976	0.991255	1631	3	1.2817
Ropn1l	4	0.9489	0.95027	0.992919	18420	0	4.4829	0.028042	0.10976	0.991255	1632	4	4.4829
Olfr350	4	0.97193	0.96427	0.992919	18801	0	1.2451	0.028068	0.10976	0.991255	1633	4	1.2451
Gna11	3	0.9719	0.95894	0.992919	18800	0	6.6866	0.028096	0.092803	0.991255	1634	3	6.6866
Mettl6	4	0.97185	0.96427	0.992919	18799	0	1.6381	0.028147	0.10976	0.991255	1635	4	1.6381
Pbp2	4	0.081776	0.20384	0.992919	3262	3	-1.4733	0.02815	0.10976	0.991255	1636	1	-1.4733
Gpbp1	3	0.74431	0.75678	0.992919	14554	0	-0.60886	0.02819	0.092803	0.991255	1637	2	-0.60886
Igsf21	4	0.94794	0.94982	0.992919	18397	0	4.6317	0.028195	0.10976	0.991255	1638	4	4.6317
Egr1	4	0.68039	0.72292	0.992919	13430	1	0.63004	0.028204	0.10976	0.991255	1639	2	0.63004
Taar6	4	0.9545	0.95244	0.992919	18522	0	3.8014	0.028221	0.10976	0.991255	1640	4	3.8014
Parm1	4	0.34433	0.51612	0.992919	8930	1	5.0218	0.028228	0.10976	0.991255	1641	3	5.0218
Scn2a1	4	0.5174	0.60915	0.992919	11008	1	3.8922	0.028277	0.11002	0.991255	1642	3	3.8922
Dnajb14	4	0.90496	0.91281	0.992919	17578	0	4.1889	0.028283	0.11002	0.991255	1643	3	4.1889
Ubap1l	4	0.83043	0.83945	0.992919	16223	0	4.9798	0.02831	0.11002	0.991255	1644	3	4.9798
Iqck	4	0.56046	0.64248	0.992919	11601	1	0.95037	0.028314	0.11002	0.991255	1645	2	0.95037
Olfr446	4	0.94667	0.9494	0.992919	18369	0	4.2592	0.028316	0.11002	0.991255	1646	4	4.2592
Nhlh1	4	0.44554	0.57179	0.992919	10166	1	3.8547	0.028321	0.11002	0.991255	1647	3	3.8547
Klrb1b	4	0.97167	0.96391	0.992919	18797	0	4.7964	0.028326	0.11058	0.991255	1648	4	4.7964
Gad2	4	0.80353	0.81977	0.992919	15676	0	3.2607	0.028346	0.11058	0.991255	1649	3	3.2607
Stat5b	4	0.61799	0.68802	0.992919	12467	1	1.8989	0.028368	0.11058	0.991255	1650	3	1.8989
Fam19a4	4	0.6532	0.70404	0.992919	13020	1	4.1515	0.028382	0.11058	0.991255	1651	3	4.1515
Cpvl	4	0.74552	0.76283	0.992919	14582	1	1.1823	0.028423	0.11058	0.991255	1652	2	1.1823
Ldhb	4	0.84156	0.84931	0.992919	16411	0	3.7161	0.028429	0.11058	0.991255	1653	3	3.7161
Irs2	4	0.97156	0.96391	0.992919	18796	0	2.2581	0.02844	0.11058	0.991255	1654	4	2.2581
Pcdha3	4	0.18946	0.36918	0.992919	5795	1	4.1186	0.02846	0.11058	0.991255	1655	3	4.1186
Mical2	4	0.97153	0.96391	0.992919	18795	0	1.2957	0.028471	0.11058	0.991255	1656	4	1.2957
Cd72	4	0.45623	0.57577	0.992919	10294	1	0.20374	0.028478	0.11058	0.991255	1657	1	0.20374
Trh	4	0.97152	0.96391	0.992919	18794	0	2.5221	0.028478	0.11058	0.991255	1658	4	2.5221
Zfp526	4	0.96387	0.95999	0.992919	18694	0	4.6302	0.028481	0.11058	0.991255	1659	4	4.6302
Rtn2	4	0.97143	0.96373	0.992919	18793	0	1.5285	0.028568	0.11071	0.991255	1660	4	1.5285
Pnmal1	4	0.50448	0.59853	0.992919	10836	1	4.0804	0.028586	0.11084	0.991255	1661	3	4.0804
Chka	4	0.46759	0.58117	0.992919	10425	1	3.3692	0.028587	0.11084	0.991255	1662	2	3.3692
Als2cr12	4	0.75823	0.77492	0.992919	14800	1	4.3704	0.028597	0.11084	0.991255	1663	3	4.3704
Slc7a10	4	0.89547	0.90199	0.992919	17407	0	1.7394	0.028641	0.11084	0.991255	1664	3	1.7394
Gm4794	4	0.87169	0.87364	0.992919	17013	0	4.2005	0.028658	0.11084	0.991255	1665	3	4.2005
Ifi27l2a	4	0.18831	0.36544	0.992919	5770	1	2.4558	0.028696	0.1111	0.991255	1666	2	2.4558
Dlg3	4	0.27588	0.45842	0.992919	7567	1	2.7735	0.028701	0.1111	0.991255	1667	2	2.7735
Ttc39d	3	0.97127	0.95784	0.992919	18792	0	4.09	0.02873	0.094219	0.991255	1668	3	4.09
Tsc22d3	4	0.59304	0.66388	0.992919	12054	1	2.7242	0.028751	0.1111	0.991255	1669	2	2.7242
Cxcl2	4	0.97031	0.96251	0.992919	18772	0	4.4692	0.028752	0.1111	0.991255	1670	4	4.4692
Mgat3	4	0.97121	0.96321	0.992919	18790	0	1.4283	0.028787	0.1111	0.991255	1671	4	1.4283
Olfr1513	4	0.97121	0.96321	0.992919	18789	0	2.4236	0.028787	0.1111	0.991255	1672	4	2.4236
Ncf1	4	0.94599	0.94811	0.992919	18352	0	3.6307	0.028805	0.1111	0.991255	1673	4	3.6307
Lurap1	3	0.97119	0.95784	0.992919	18788	0	5.5168	0.028809	0.094219	0.991255	1674	3	5.5168
Snx15	4	0.97116	0.96321	0.992919	18787	0	2.921	0.028842	0.1111	0.991255	1675	4	2.921
Prr30	4	0.41246	0.55572	0.992919	9799	1	0.12744	0.02886	0.1111	0.991255	1676	1	0.12744
Krit1	4	0.0029285	0.015141	0.992919	192	1	4.8468	0.028863	0.1111	0.991255	1677	3	4.8468
Plet1	4	0.080199	0.2028	0.992919	3213	1	2.2687	0.028915	0.1111	0.991255	1678	3	2.2687
Insig1	4	0.96978	0.96216	0.992919	18764	0	3.927	0.028924	0.1111	0.991255	1679	4	3.927
Klk1b27	4	0.89747	0.90346	0.992919	17445	0	4.8388	0.02893	0.1111	0.991255	1680	3	4.8388
Tmem204	4	0.070056	0.18041	0.992919	2874	2	-0.71065	0.028969	0.1111	0.991255	1681	2	-0.71065
Tyrp1	3	0.87329	0.88074	0.992919	17027	0	6.0592	0.028992	0.094219	0.991255	1682	2	6.0592
Afap1l2	4	0.68383	0.72425	0.992919	13490	1	0.061063	0.029024	0.11145	0.991255	1683	1	0.061063
Hps1	4	0.65478	0.70404	0.992919	13047	1	3.6643	0.029058	0.11145	0.991255	1684	3	3.6643
Trim12c	4	0.97093	0.96321	0.992919	18786	0	1.512	0.029067	0.11145	0.991255	1685	4	1.512
Stk11ip	4	0.75565	0.77227	0.992919	14752	1	3.0036	0.029089	0.11171	0.991255	1686	2	3.0036
Saa2	3	0.24007	0.38176	0.992919	6874	1	6.0806	0.029091	0.094219	0.991255	1687	2	6.0806
Chst7	3	0.30289	0.41264	0.992919	8122	1	5.3819	0.029093	0.094219	0.991255	1688	2	5.3819
Gabrr1	4	0.97083	0.96286	0.992919	18784	0	0.9171	0.029174	0.11227	0.991255	1689	4	0.9171
Tmem9	4	0.59006	0.66186	0.992919	12008	1	4.8477	0.029205	0.11227	0.991255	1690	3	4.8477
Mtfp1	4	0.97079	0.96286	0.992919	18783	0	3.3704	0.029213	0.11227	0.991255	1691	4	3.3704
Prr13	4	0.97079	0.96286	0.992919	18782	0	2.477	0.029213	0.11227	0.991255	1692	4	2.477
Spata13	3	0.4658	0.5315	0.992919	10400	1	4.3855	0.029217	0.094219	0.991255	1693	2	4.3855
Kcne4	4	0.82608	0.83622	0.992919	16136	0	4.15	0.029279	0.11284	0.991255	1694	3	4.15
Mettl17	4	0.78464	0.7932	0.992919	15305	0	-1.2252	0.029297	0.11284	0.991255	1695	2	-1.2252
Timp4	3	0.9707	0.9573	0.992919	18778	0	4.362	0.029299	0.094668	0.991255	1696	3	4.362
Matn2	4	0.48273	0.58385	0.992919	10583	1	4.2139	0.0293	0.11284	0.991255	1697	3	4.2139
Cfap74	4	0.95631	0.95448	0.992919	18556	0	4.6897	0.029316	0.11344	0.991255	1698	4	4.6897
Gm11937	4	0.97066	0.96286	0.992919	18777	0	1.3517	0.029336	0.11403	0.991255	1699	4	1.3517
Fam166b	4	0.87749	0.88008	0.992919	17097	0	4.4995	0.029349	0.11403	0.991255	1700	3	4.4995
Exph5	4	0.68135	0.72292	0.992919	13444	1	4.5718	0.029353	0.11403	0.991255	1701	3	4.5718
Trem1	4	0.97064	0.96286	0.992919	18776	0	4.4237	0.029359	0.11403	0.991255	1702	4	4.4237
Prpf39	4	0.97063	0.96286	0.992919	18775	0	1.7719	0.029371	0.11403	0.991255	1703	4	1.7719
Vmn2r87	4	0.70788	0.73492	0.992919	13890	1	4.5339	0.029385	0.11403	0.991255	1704	3	4.5339
Zcchc12	4	0.34616	0.51729	0.992919	8970	2	0.069397	0.029406	0.11403	0.991255	1705	2	0.069397
Ctps2	4	0.97058	0.96286	0.992919	18774	0	1.8732	0.029423	0.11403	0.991255	1706	4	1.8732
Aven	4	0.45144	0.57313	0.992919	10239	1	4.1802	0.029445	0.11403	0.991255	1707	3	4.1802
Ces2a	4	0.27694	0.4595	0.992919	7581	1	5.1006	0.029459	0.11403	0.991255	1708	3	5.1006
Cyp2c40	4	0.12625	0.26823	0.992919	4377	1	0.93796	0.029461	0.11403	0.991255	1709	2	0.93796
Atp5k	2	0.17134	0.24529	0.992919	5416	1	3.9719	0.029501	0.059544	0.991255	1710	1	3.9719
Mylip	4	0.8222	0.83194	0.992919	16041	0	3.023	0.029512	0.11435	0.991255	1711	2	3.023
Atp10b	4	0.058559	0.15432	0.992919	2484	1	3.7103	0.029554	0.11435	0.991255	1712	2	3.7103
Stat4	4	0.42852	0.56106	0.992919	9966	1	2.2898	0.02957	0.11435	0.991255	1713	2	2.2898
Zfp61	4	0.70052	0.73221	0.992919	13771	1	0.49718	0.029679	0.11462	0.991255	1714	2	0.49718
Zdhhc13	4	0.97031	0.96251	0.992919	18773	0	1.7462	0.02969	0.11462	0.991255	1715	4	1.7462
AU021092	4	0.79206	0.80569	0.992919	15455	0	4.0052	0.029692	0.11462	0.991255	1716	3	4.0052
Vmn2r103	3	0.092798	0.19502	0.992919	3609	1	0.70241	0.029709	0.095117	0.991255	1717	2	0.70241
Tmem199	2	0.21841	0.27859	0.992919	6447	1	3.1304	0.029721	0.059889	0.991255	1718	1	3.1304
Olfr1040	4	0.97028	0.96251	0.992919	18771	0	4.1222	0.029722	0.11462	0.991255	1719	4	4.1222
Vmn2r65	4	0.81187	0.82431	0.992919	15827	0	4.842	0.029739	0.11462	0.991255	1720	3	4.842
Cadps2	4	0.82822	0.83945	0.992919	16177	0	5.0951	0.029745	0.11462	0.991255	1721	3	5.0951
Slc22a19	4	0.18722	0.36354	0.992919	5752	1	4.7261	0.029761	0.11489	0.991255	1722	3	4.7261
Sumo1	4	0.97023	0.96216	0.992919	18770	0	1.564	0.029766	0.11489	0.991255	1723	4	1.564
Ss18	4	0.33768	0.51116	0.992919	8798	2	2.2454	0.029788	0.11489	0.991255	1724	2	2.2454
Spaca5	4	0.47476	0.58252	0.992919	10506	1	4.8903	0.029835	0.11489	0.991255	1725	3	4.8903
Mapk8ip1	4	0.97016	0.96216	0.992919	18769	0	1.2353	0.029838	0.11489	0.991255	1726	4	1.2353
Zbed3	4	0.28872	0.46629	0.992919	7822	2	0.28773	0.029843	0.11489	0.991255	1727	2	0.28773
Ncstn	3	0.92569	0.91422	0.992919	17996	0	6.1489	0.029848	0.095117	0.991255	1728	3	6.1489
Sprr1b	4	0.4339	0.56106	0.992919	10039	1	3.2063	0.029858	0.11489	0.991255	1729	3	3.2063
Dnajb1	4	0.65549	0.70538	0.992919	13061	1	3.2146	0.029873	0.11489	0.991255	1730	2	3.2146
Galr2	4	0.93344	0.93991	0.992919	18127	0	4.0786	0.029884	0.11489	0.991255	1731	3	4.0786
Tatdn1	4	0.1519	0.30059	0.992919	4977	2	2.6038	0.029905	0.11489	0.991255	1732	2	2.6038
Cox7b2	4	0.55451	0.64248	0.992919	11518	1	4.8357	0.029966	0.1155	0.991255	1733	3	4.8357
Kdelc1	4	0.97003	0.96216	0.992919	18768	0	1.9497	0.029966	0.1155	0.991255	1734	4	1.9497
Setd5	4	0.78025	0.79193	0.992919	15229	0	0.35421	0.030007	0.1155	0.991255	1735	2	0.35421
Bambi	3	0.29534	0.40825	0.992919	7967	1	6.92	0.030011	0.095117	0.991255	1736	2	6.92
Olfr1126	4	0.96999	0.96216	0.992919	18767	0	1.7716	0.030012	0.1155	0.991255	1737	4	1.7716
Cdk5	4	0.016455	0.072448	0.992919	868	2	0.44771	0.030061	0.1155	0.991255	1738	2	0.44771
Rbpj	4	0.59267	0.66388	0.992919	12050	1	3.0209	0.03012	0.11584	0.991255	1739	3	3.0209
Fam219a	4	0.86029	0.86427	0.992919	16794	0	3.6625	0.030129	0.11584	0.991255	1740	3	3.6625
Hand2	3	0.75462	0.76038	0.992919	14743	0	1.27	0.030161	0.095955	0.991255	1741	2	1.27
Letm2	4	0.3194	0.49274	0.992919	8442	1	2.6646	0.03017	0.11584	0.991255	1742	2	2.6646
Dnajb12	4	0.62	0.68938	0.992919	12497	1	3.9916	0.03024	0.11644	0.991255	1743	3	3.9916
Aldoc	4	0.60162	0.67268	0.992919	12190	1	2.1661	0.03028	0.11644	0.991255	1744	3	2.1661
Aes	4	0.67856	0.72088	0.992919	13403	1	1.2837	0.030334	0.11679	0.991255	1745	3	1.2837
Zfp819	4	0.6654	0.71077	0.992919	13203	1	0.21701	0.030389	0.11679	0.991255	1746	2	0.21701
Sipa1l2	4	0.8737	0.8741	0.992919	17034	0	5.1556	0.030451	0.11679	0.991255	1747	3	5.1556
Rnf17	4	0.42018	0.55836	0.992919	9874	1	3.193	0.030473	0.11679	0.991255	1748	2	3.193
Yipf6	4	0.92687	0.9336	0.992919	18031	0	3.6315	0.030516	0.11679	0.991255	1749	2	3.6315
Mup19	2	0.96941	0.95921	0.992919	18763	0	5.5879	0.030587	0.06067	0.991255	1750	2	5.5879
Scn4a	4	0.01793	0.074872	0.992919	935	2	-0.62516	0.030607	0.11679	0.991255	1751	1	-0.62516
Ifitm1	3	0.067685	0.14621	0.992919	2796	1	6.1105	0.030629	0.097841	0.991255	1752	2	6.1105
Dip2a	4	0.16904	0.3296	0.992919	5373	1	4.7038	0.030677	0.11679	0.991255	1753	3	4.7038
Sertad4	4	0.70137	0.73221	0.992919	13783	1	3.7481	0.030717	0.11679	0.991255	1754	3	3.7481
Eml5	3	0.96919	0.95519	0.992919	18762	0	3.4396	0.030805	0.098348	0.991255	1755	3	3.4396
Ascl4	4	0.026947	0.098698	0.992919	1304	1	3.1479	0.030807	0.11714	0.991255	1756	2	3.1479
Irs1	4	0.21956	0.40002	0.992919	6470	2	0.84551	0.030825	0.11714	0.991255	1757	2	0.84551
P2rx7	4	0.89678	0.90309	0.992919	17434	0	4.6757	0.03085	0.11746	0.991255	1758	3	4.6757
Slc35g3	4	0.82316	0.83408	0.992919	16060	0	3.2164	0.030861	0.11746	0.991255	1759	2	3.2164
Cyp4a32	4	0.63453	0.69604	0.992919	12722	1	1.9241	0.03088	0.11747	0.991255	1760	3	1.9241
Zswim4	4	0.85212	0.8586	0.992919	16640	0	3.2536	0.030882	0.11747	0.991255	1761	2	3.2536
Ifi30	4	0.74572	0.76283	0.992919	14590	1	1.0601	0.030989	0.11897	0.991255	1762	3	1.0601
Lct	4	0.44259	0.56848	0.992919	10135	1	4.3706	0.031007	0.11931	0.991255	1763	3	4.3706
Agmat	4	0.29642	0.47551	0.992919	7992	2	0.3548	0.031043	0.11931	0.991255	1764	2	0.3548
Zfp81	4	0.48063	0.58385	0.992919	10568	1	3.6489	0.031059	0.11931	0.991255	1765	3	3.6489
Prkd1	4	0.16997	0.33341	0.992919	5391	2	1.9099	0.031098	0.11931	0.991255	1766	2	1.9099
Dram2	4	0.17981	0.35099	0.992919	5577	2	1.6052	0.031152	0.11931	0.991255	1767	2	1.6052
Phex	4	0.46158	0.57847	0.992919	10350	1	4.779	0.031164	0.11931	0.991255	1768	3	4.779
Cln6	4	0.96876	0.9618	0.992919	18747	0	4.7604	0.031243	0.11992	0.991255	1769	4	4.7604
Arl6ip1	4	0.96876	0.9618	0.992919	18749	0	3.2258	0.031243	0.11992	0.991255	1770	4	3.2258
Olfr1494	4	0.96876	0.9618	0.992919	18750	0	3.3995	0.031243	0.11992	0.991255	1771	4	3.3995
C1qtnf4	4	0.96876	0.9618	0.992919	18759	0	1.0734	0.031243	0.11992	0.991255	1772	4	1.0734
Zbtb20	4	0.96876	0.9618	0.992919	18757	0	3.3839	0.031243	0.11992	0.991255	1773	4	3.3839
Ano1	4	0.96876	0.9618	0.992919	18760	0	3.4481	0.031243	0.11992	0.991255	1774	4	3.4481
Ptch1	4	0.96876	0.9618	0.992919	18751	0	1.3736	0.031243	0.11992	0.991255	1775	4	1.3736
Spa17	4	0.96876	0.9618	0.992919	18758	0	3.4304	0.031243	0.11992	0.991255	1776	4	3.4304
Degs2	4	0.96876	0.9618	0.992919	18752	0	3.2761	0.031243	0.11992	0.991255	1777	4	3.2761
Gtpbp8	4	0.96876	0.9618	0.992919	18754	0	2.5027	0.031243	0.11992	0.991255	1778	4	2.5027
Rab34	4	0.96876	0.9618	0.992919	18761	0	2.5969	0.031243	0.11992	0.991255	1779	4	2.5969
Ranbp1	4	0.75145	0.77091	0.992919	14688	1	4.0806	0.031246	0.12017	0.991255	1780	3	4.0806
Rap1gap	4	0.79559	0.81281	0.992919	15525	0	1.7291	0.031261	0.12017	0.991255	1781	2	1.7291
2700097O09Rik	3	0.10523	0.21675	0.992919	3898	2	-0.96845	0.031309	0.099332	0.991255	1782	1	-0.96845
Uevld	4	0.92519	0.93198	0.992919	17988	0	3.7166	0.031316	0.12017	0.991255	1783	3	3.7166
Myo10	4	0.85172	0.8586	0.992919	16635	0	0.1427	0.031371	0.12017	0.991255	1784	1	0.1427
Lox	4	0.12994	0.27435	0.992919	4465	2	2.8001	0.031382	0.12017	0.991255	1785	2	2.8001
Atg3	3	0.96858	0.95519	0.992919	18746	0	2.9366	0.031425	0.099333	0.991255	1786	3	2.9366
Ankrd53	4	0.63366	0.69468	0.992919	12713	1	0.81681	0.031425	0.12082	0.991255	1787	2	0.81681
Ccdc63	4	0.91432	0.92511	0.992919	17764	0	4.9626	0.031427	0.12082	0.991255	1788	3	4.9626
Vps9d1	4	0.9465	0.9494	0.992919	18365	0	4.8397	0.031439	0.12082	0.991255	1789	4	4.8397
Pja2	3	0.35557	0.44782	0.992919	9140	1	5.7331	0.031451	0.099333	0.991255	1790	2	5.7331
Zfp180	4	0.22359	0.40882	0.992919	6561	1	2.1016	0.03148	0.12082	0.991255	1791	3	2.1016
Cdon	3	0.20615	0.35691	0.992919	6180	1	5.6515	0.031483	0.099333	0.991255	1792	2	5.6515
Gm14393	2	0.96848	0.95796	0.992919	18745	0	5.3564	0.031522	0.061841	0.991255	1793	2	5.3564
Gp9	4	0.32625	0.49529	0.992919	8584	2	3.4182	0.031523	0.12082	0.991255	1794	2	3.4182
Tial1	4	0.1537	0.30835	0.992919	5016	2	0.44505	0.031534	0.12082	0.991255	1795	2	0.44505
Izumo2	4	0.35978	0.52624	0.992919	9240	2	2.5525	0.031545	0.12082	0.991255	1796	2	2.5525
Rpp40	4	0.84384	0.8503	0.992919	16499	0	4.0031	0.031574	0.12143	0.991255	1797	3	4.0031
Etv4	4	0.14254	0.2901	0.992919	4762	1	4.6691	0.031586	0.12143	0.991255	1798	3	4.6691
Dtna	4	0.46759	0.58117	0.992919	10423	1	-0.22267	0.031589	0.12143	0.991255	1799	2	-0.22267
Fnip2	4	0.92431	0.93088	0.992919	17972	0	3.4368	0.031644	0.12143	0.991255	1800	3	3.4368
Gm7694	4	0.72646	0.74818	0.992919	14213	1	2.5843	0.031654	0.12143	0.991255	1801	2	2.5843
Rhox2b	2	0.37299	0.42054	0.992919	9391	1	4.1387	0.031673	0.061842	0.991255	1802	1	4.1387
Sppl2b	4	0.40167	0.54907	0.992919	9694	1	2.9224	0.031698	0.12178	0.991255	1803	3	2.9224
Tbl1xr1	4	0.73652	0.75747	0.992919	14401	1	3.8393	0.031727	0.12178	0.991255	1804	3	3.8393
Fshr	4	0.048969	0.13765	0.992919	2127	1	3.141	0.031731	0.12178	0.991255	1805	2	3.141
Guf1	4	0.35132	0.52241	0.992919	9062	1	0.72724	0.031752	0.12178	0.991255	1806	2	0.72724
Adrbk1	4	0.82166	0.82978	0.992919	16017	0	4.6577	0.031756	0.12178	0.991255	1807	3	4.6577
Dusp9	4	0.86906	0.87014	0.992919	16955	0	5.1799	0.031807	0.12178	0.991255	1808	3	5.1799
Tmem154	4	0.82074	0.82873	0.992919	16010	0	4.0921	0.031841	0.12239	0.991255	1809	3	4.0921
Prdx6b	4	0.72112	0.74291	0.992919	14107	1	3.3245	0.031939	0.12373	0.991255	1810	2	3.3245
Stard5	4	0.075071	0.1895	0.992919	3024	3	-0.77949	0.032025	0.12373	0.991255	1811	1	-0.77949
Cep97	4	0.19339	0.37463	0.992919	5880	1	3.7344	0.03206	0.12373	0.991255	1812	3	3.7344
Slc5a4a	4	0.9148	0.92572	0.992919	17775	0	5.2714	0.032064	0.12373	0.991255	1813	3	5.2714
T	4	0.2968	0.47551	0.992919	7998	1	3.6237	0.032104	0.12373	0.991255	1814	2	3.6237
B4galnt1	4	0.7073	0.73425	0.992919	13874	1	4.7173	0.032159	0.12407	0.991255	1815	3	4.7173
Ndrg2	4	0.19441	0.37562	0.992919	5909	2	2.9408	0.032192	0.12445	0.991255	1816	2	2.9408
Ago2	4	0.88371	0.88427	0.992919	17209	0	4.032	0.032201	0.12445	0.991255	1817	3	4.032
Vps53	3	0.68803	0.69716	0.992919	13558	0	-2.0315	0.032211	0.10049	0.991255	1818	1	-2.0315
Fam162a	4	0.28289	0.46307	0.992919	7708	2	3.0494	0.032236	0.12445	0.991255	1819	2	3.0494
Iffo1	3	0.96776	0.95442	0.992919	18744	0	4.6711	0.032239	0.10049	0.991255	1820	3	4.6711
3110062M04Rik	4	0.93249	0.93991	0.992919	18111	0	0.41438	0.032243	0.12445	0.991255	1821	2	0.41438
Olfr1124	4	0.35739	0.52624	0.992919	9183	1	3.4905	0.032302	0.12445	0.991255	1822	2	3.4905
Fam132b	4	0.52072	0.61186	0.992919	11056	1	4.5302	0.032308	0.12445	0.991255	1823	3	4.5302
Hypk	3	0.68587	0.69438	0.992919	13526	0	3.8726	0.032334	0.10049	0.991255	1824	2	3.8726
Xrn1	4	0.7644	0.77892	0.992919	14912	1	3.6543	0.03235	0.12445	0.991255	1825	3	3.6543
Eda2r	4	0.62998	0.69341	0.992919	12639	1	3.3729	0.032352	0.12445	0.991255	1826	2	3.3729
D630023F18Rik	4	0.91232	0.92331	0.992919	17724	0	3.9785	0.03238	0.12445	0.991255	1827	3	3.9785
Efemp2	4	0.96761	0.96145	0.992919	18741	0	3.3046	0.032389	0.12445	0.991255	1828	4	3.3046
Coprs	4	0.96759	0.96145	0.992919	18740	0	0.90117	0.032411	0.12445	0.991255	1829	4	0.90117
Lrrc16b	4	0.96759	0.96145	0.992919	18739	0	1.8975	0.032415	0.12445	0.991255	1830	4	1.8975
Vmn1r36	3	0.96757	0.95403	0.992919	18738	0	4.5335	0.032426	0.10081	0.991255	1831	3	4.5335
Vmn1r210	4	0.12291	0.26166	0.992919	4310	1	3.7522	0.032515	0.12482	0.991255	1832	3	3.7522
Sdc3	4	0.17575	0.34006	0.992919	5493	2	2.4413	0.032534	0.12482	0.991255	1833	2	2.4413
Wdtc1	4	0.4509	0.57313	0.992919	10230	1	3.3245	0.032559	0.12482	0.991255	1834	3	3.3245
Fam151a	4	0.74499	0.76017	0.992919	14576	1	0.78038	0.032569	0.12482	0.991255	1835	2	0.78038
Per3	3	0.50626	0.5681	0.992919	10854	1	6.2586	0.032622	0.10114	0.991255	1836	2	6.2586
Zfp275	4	0.34402	0.51612	0.992919	8926	1	3.871	0.032631	0.12482	0.991255	1837	3	3.871
Zfp40	4	0.17205	0.33433	0.992919	5432	1	3.8884	0.032643	0.12482	0.991255	1838	3	3.8884
Ss18l1	4	0.96727	0.96145	0.992919	18737	0	1.8717	0.032732	0.12519	0.991255	1839	4	1.8717
Scn8a	4	0.31341	0.49057	0.992919	8317	2	-2.0369	0.032733	0.12519	0.991255	1840	1	-2.0369
Mpdu1	4	0.40589	0.55041	0.992919	9729	1	3.6783	0.032745	0.12544	0.991255	1841	3	3.6783
Wwc1	4	0.95398	0.95243	0.992919	18511	0	3.953	0.032769	0.12582	0.991255	1842	4	3.953
Fam76a	4	0.20285	0.3881	0.992919	6096	1	4.9474	0.032775	0.12582	0.991255	1843	3	4.9474
Prps1	3	0.14113	0.27989	0.992919	4726	1	4.4995	0.032785	0.10114	0.991255	1844	2	4.4995
Hs2st1	4	0.96721	0.9611	0.992919	18736	0	2.9977	0.032785	0.12583	0.991255	1845	4	2.9977
Susd2	4	0.023934	0.094679	0.992919	1171	2	-2.0815	0.032787	0.12583	0.991255	1846	1	-2.0815
Lce1c	4	0.67276	0.71817	0.992919	13311	1	3.4536	0.032789	0.12583	0.991255	1847	2	3.4536
AI607873	4	0.18583	0.36081	0.992919	5721	1	3.708	0.0328	0.12618	0.991255	1848	3	3.708
Dcun1d3	3	0.96719	0.95363	0.992919	18735	0	2.2695	0.032815	0.10114	0.991255	1849	3	2.2695
Tbxa2r	4	0.26924	0.45578	0.992919	7450	1	3.5661	0.032867	0.12618	0.991255	1850	3	3.5661
Fam19a3	4	0.96709	0.96109	0.992919	18734	0	1.1951	0.032908	0.12716	0.991255	1851	4	1.1951
Hkdc1	4	0.032413	0.11268	0.992919	1516	2	1.8455	0.032912	0.12716	0.991255	1852	2	1.8455
Syn1	4	0.96705	0.96109	0.992919	18733	0	0.91194	0.032947	0.12716	0.991255	1853	4	0.91194
Tlcd2	3	0.68153	0.69368	0.992919	13454	0	0.45917	0.032948	0.10114	0.991255	1854	1	0.45917
Zfp768	4	0.87966	0.88094	0.992919	17138	0	4.2107	0.032956	0.12716	0.991255	1855	3	4.2107
Golim4	4	0.8465	0.85079	0.992919	16541	0	1.6724	0.033005	0.12716	0.991255	1856	2	1.6724
Calhm2	4	0.64326	0.69868	0.992919	12873	1	3.5065	0.033112	0.12782	0.991255	1857	2	3.5065
Musk	4	0.46409	0.57983	0.992919	10381	1	1.0264	0.033114	0.12782	0.991255	1858	2	1.0264
Sox5	4	0.51142	0.6032	0.992919	10925	1	2.6457	0.033123	0.12782	0.991255	1859	2	2.6457
Eml3	4	0.34015	0.51497	0.992919	8841	1	0.99955	0.033169	0.12782	0.991255	1860	2	0.99955
Fndc4	4	0.96683	0.96074	0.992919	18731	0	2.2904	0.033172	0.12782	0.991255	1861	4	2.2904
1110032F04Rik	4	0.96682	0.96074	0.992919	18730	0	4.224	0.033176	0.12782	0.991255	1862	4	4.224
Olfr1506	4	0.64763	0.69868	0.992919	12939	1	4.1228	0.033212	0.12782	0.991255	1863	3	4.1228
Fcer1a	4	0.32024	0.49274	0.992919	8455	1	1.4101	0.033223	0.12782	0.991255	1864	3	1.4101
Abtb2	4	0.96677	0.96074	0.992919	18729	0	1.3675	0.033229	0.12782	0.991255	1865	4	1.3675
Rhox3e	2	0.96676	0.95445	0.992919	18728	0	5.044	0.03324	0.066778	0.991255	1866	2	5.044
Atp1a2	3	0.95256	0.93772	0.992919	18487	0	5.5202	0.033263	0.10146	0.991255	1867	3	5.5202
Chat	4	0.017201	0.073428	0.992919	896	2	-2.2377	0.033277	0.12782	0.991255	1868	1	-2.2377
Ccdc6	4	0.96671	0.96074	0.992919	18727	0	1.0252	0.033285	0.12782	0.991255	1869	4	1.0252
Olfr1461	4	0.9667	0.96074	0.992919	18726	0	2.6484	0.033296	0.12782	0.991255	1870	4	2.6484
Galp	4	0.71948	0.74291	0.992919	14069	1	1.2714	0.033332	0.12782	0.991255	1871	3	1.2714
Olfr491	4	0.94291	0.94674	0.992919	18292	0	3.6807	0.033335	0.12782	0.991255	1872	3	3.6807
Tnfsf4	4	0.93287	0.93991	0.992919	18121	0	4.1704	0.033347	0.12782	0.991255	1873	3	4.1704
Tas2r126	4	0.37266	0.53301	0.992919	9389	1	3.5914	0.033368	0.12782	0.991255	1874	3	3.5914
Kif9	4	0.75823	0.77492	0.992919	14804	1	-0.21468	0.033386	0.12782	0.991255	1875	1	-0.21468
Hacd1	4	0.37083	0.53301	0.992919	9369	1	4.3013	0.033392	0.12782	0.991255	1876	3	4.3013
Gsx2	4	0.96659	0.96074	0.992919	18725	0	3.142	0.033407	0.12782	0.991255	1877	4	3.142
Ms4a1	4	0.55178	0.64116	0.992919	11479	1	4.5332	0.033429	0.12782	0.991255	1878	3	4.5332
Adora3	4	0.13256	0.27597	0.992919	4526	2	2.1086	0.033436	0.12782	0.991255	1879	2	2.1086
Irx3	4	0.2953	0.47442	0.992919	7964	1	2.3212	0.033441	0.12782	0.991255	1880	2	2.3212
Bbox1	4	0.45831	0.57577	0.992919	10315	1	0.50828	0.033495	0.12782	0.991255	1881	2	0.50828
Wbp1	4	0.38555	0.54237	0.992919	9503	1	4.0582	0.033526	0.12782	0.991255	1882	3	4.0582
Dnah6	4	0.3867	0.54237	0.992919	9517	1	4.3124	0.033537	0.12782	0.991255	1883	3	4.3124
Prlhr	4	0.25443	0.43204	0.992919	7146	2	2.551	0.03355	0.12782	0.991255	1884	2	2.551
Mier1	4	0.096894	0.23042	0.992919	3702	1	-0.75966	0.033604	0.12782	0.991255	1885	1	-0.75966
Ano2	4	0.45963	0.57778	0.992919	10327	1	-0.98269	0.033658	0.12782	0.991255	1886	1	-0.98269
Olfr1006	3	0.9485	0.93472	0.992919	18408	0	3.2136	0.033726	0.10195	0.991255	1887	3	3.2136
Ccnk	3	0.69373	0.71296	0.992919	13675	0	4.805	0.033767	0.10195	0.991255	1888	2	4.805
Lppr4	4	0.50805	0.60119	0.992919	10877	1	3.0336	0.033767	0.12782	0.991255	1889	2	3.0336
Wdr34	4	0.24249	0.42133	0.992919	6923	2	1.1022	0.033822	0.12782	0.991255	1890	2	1.1022
Srpk2	4	0.90411	0.9111	0.992919	17554	0	3.8405	0.033829	0.12782	0.991255	1891	3	3.8405
Adam17	4	0.9631	0.95923	0.992919	18684	0	3.579	0.033876	0.12782	0.991255	1892	4	3.579
Map2k6	4	0.6059	0.67472	0.992919	12296	1	4.6247	0.033908	0.12782	0.991255	1893	3	4.6247
Tnfrsf10b	4	0.92642	0.93359	0.992919	18024	0	4.3233	0.033964	0.1282	0.991255	1894	3	4.3233
Lpcat1	4	0.39572	0.54772	0.992919	9622	1	3.515	0.034035	0.1282	0.991255	1895	3	3.515
Baiap2	4	0.56788	0.64652	0.992919	11693	1	3.3721	0.034055	0.1282	0.991255	1896	2	3.3721
Btnl4	4	0.13159	0.27515	0.992919	4506	2	0.25469	0.034094	0.1282	0.991255	1897	2	0.25469
N6amt1	1	0.9659	0.96266	0.992919	18721	0	8.216	0.034099	0.037342	0.991255	1898	1	8.216
Tcf15	4	0.52814	0.61708	0.992919	11148	1	3.6254	0.034111	0.1282	0.991255	1899	3	3.6254
Cox11	2	0.47778	0.49718	0.992919	10532	1	3.7827	0.034117	0.072987	0.991255	1900	1	3.7827
Kcnj2	4	0.94349	0.94719	0.992919	18302	0	4.3818	0.034158	0.1282	0.991255	1901	3	4.3818
Clrn1	4	0.89986	0.90601	0.992919	17493	0	4.255	0.034177	0.1282	0.991255	1902	3	4.255
Spata9	4	0.81423	0.82542	0.992919	15874	0	0.37089	0.034203	0.1282	0.991255	1903	2	0.37089
Reep5	3	0.91451	0.90926	0.992919	17768	0	5.6148	0.034216	0.10228	0.991255	1904	3	5.6148
Mei4	4	0.15428	0.30835	0.992919	5032	2	1.6904	0.034257	0.12884	0.991255	1905	2	1.6904
Atf4	2	0.39435	0.44047	0.992919	9605	1	2.7864	0.034309	0.074989	0.991255	1906	1	2.7864
Zbtb45	4	0.64847	0.69935	0.992919	12945	1	-0.35068	0.034311	0.12884	0.991255	1907	2	-0.35068
Lamtor3	1	0.96566	0.96266	0.992919	18720	0	7.9892	0.034336	0.037342	0.991255	1908	1	7.9892
Fam172a	4	0.80989	0.82265	0.992919	15788	0	3.8836	0.034337	0.12884	0.991255	1909	3	3.8836
Klra6	3	0.35856	0.45076	0.992919	9211	1	5.0765	0.03434	0.10228	0.991255	1910	2	5.0765
Ube4a	4	0.88583	0.88515	0.992919	17252	0	4.0071	0.034356	0.12884	0.991255	1911	3	4.0071
Gnb3	4	0.30366	0.47762	0.992919	8135	1	0.1091	0.034366	0.12884	0.991255	1912	1	0.1091
Vmn2r104	4	0.3634	0.52624	0.992919	9296	1	3.3812	0.034368	0.12884	0.991255	1913	3	3.3812
Brd7	4	0.96386	0.95999	0.992919	18693	0	4.4839	0.034405	0.12884	0.991255	1914	4	4.4839
Fxyd7	4	0.65067	0.70269	0.992919	12984	1	3.7936	0.034462	0.12884	0.991255	1915	3	3.7936
AU040320	4	0.79771	0.81517	0.992919	15559	0	0.36419	0.034475	0.12884	0.991255	1916	2	0.36419
Sfmbt1	4	0.96551	0.96074	0.992919	18709	0	3.9458	0.034487	0.12884	0.991255	1917	4	3.9458
Cd274	4	0.96551	0.96074	0.992919	18710	0	2.2878	0.034487	0.12884	0.991255	1918	4	2.2878
Olfr209	4	0.96551	0.96074	0.992919	18706	0	1.8733	0.034487	0.12884	0.991255	1919	4	1.8733
Dkkl1	4	0.96551	0.96074	0.992919	18717	0	2.6914	0.034487	0.12884	0.991255	1920	4	2.6914
Apom	4	0.96551	0.96074	0.992919	18713	0	1.0131	0.034487	0.12884	0.991255	1921	4	1.0131
Klc4	4	0.96551	0.96074	0.992919	18712	0	4.5221	0.034487	0.12884	0.991255	1922	4	4.5221
Cdkn2aipnl	4	0.96551	0.96074	0.992919	18719	0	3.6137	0.034487	0.12884	0.991255	1923	4	3.6137
Olfr958	4	0.96551	0.96074	0.992919	18716	0	1.3099	0.034487	0.12884	0.991255	1924	4	1.3099
Rhcg	4	0.96551	0.96074	0.992919	18711	0	1.8076	0.034487	0.12884	0.991255	1925	4	1.8076
4930562C15Rik	4	0.96551	0.96074	0.992919	18707	0	1.2304	0.034487	0.12884	0.991255	1926	4	1.2304
Mup10	4	0.96551	0.96074	0.992919	18718	0	3.9474	0.034487	0.12884	0.991255	1927	4	3.9474
Aebp2	4	0.47273	0.58252	0.992919	10481	1	4.1515	0.034529	0.12924	0.991255	1928	3	4.1515
Akr1a1	3	0.0064114	0.031038	0.992919	391	2	-1.1845	0.034545	0.10228	0.991255	1929	1	-1.1845
Vwde	4	0.26743	0.45264	0.992919	7417	1	0.23444	0.034583	0.12924	0.991255	1930	3	0.23444
Zfp618	4	0.68039	0.72292	0.992919	13437	1	3.6151	0.034585	0.12924	0.991255	1931	3	3.6151
Kmt2c	4	0.76393	0.77892	0.992919	14903	1	3.5715	0.034604	0.12924	0.991255	1932	3	3.5715
Terf1	2	0.34202	0.38838	0.992919	8882	1	3.4134	0.034666	0.076283	0.991255	1933	1	3.4134
Cenpb	4	0.79228	0.80569	0.992919	15459	0	4.0376	0.034667	0.12924	0.991255	1934	3	4.0376
Slc45a3	4	0.73227	0.75481	0.992919	14293	1	3.6335	0.034697	0.12924	0.991255	1935	3	3.6335
Zfp1	4	0.74186	0.75882	0.992919	14505	1	4.6387	0.034701	0.12924	0.991255	1936	3	4.6387
Cmtm3	4	0.88496	0.88427	0.992919	17236	0	3.6207	0.034724	0.12924	0.991255	1937	2	3.6207
Ccdc89	4	0.92473	0.93116	0.992919	17982	0	5.1387	0.034735	0.12924	0.991255	1938	3	5.1387
Crkl	4	0.13395	0.2768	0.992919	4558	2	-1.9788	0.034747	0.12924	0.991255	1939	2	-1.9788
Smagp	4	0.52412	0.61447	0.992919	11096	1	0.21738	0.034801	0.12963	0.991255	1940	2	0.21738
Cradd	4	0.37477	0.53301	0.992919	9405	1	3.8816	0.034828	0.12963	0.991255	1941	3	3.8816
Gm6904	4	0.30464	0.47762	0.992919	8148	2	1.9964	0.034849	0.12963	0.991255	1942	2	1.9964
Glrx2	4	0.69042	0.72831	0.992919	13601	1	2.4976	0.034855	0.12963	0.991255	1943	3	2.4976
Sry	4	0.95561	0.95369	0.992919	18546	0	3.0336	0.034872	0.12963	0.991255	1944	4	3.0336
Pak1	4	0.51817	0.61049	0.992919	11021	1	0.78982	0.03491	0.12963	0.991255	1945	2	0.78982
Iqsec3	4	0.74419	0.76017	0.992919	14546	1	4.6434	0.034917	0.12963	0.991255	1946	3	4.6434
Kctd7	3	0.96506	0.95285	0.992919	18705	0	1.3553	0.034937	0.10228	0.991255	1947	3	1.3553
Cfi	4	0.69675	0.72957	0.992919	13708	1	3.4566	0.034964	0.12963	0.991255	1948	3	3.4566
Six6	4	0.91555	0.92632	0.992919	17787	0	4.1268	0.034978	0.12963	0.991255	1949	3	4.1268
Mycbp	4	0.70408	0.73358	0.992919	13823	1	3.7318	0.035016	0.12963	0.991255	1950	3	3.7318
P2rx4	4	0.6197	0.68938	0.992919	12493	1	4.0637	0.035073	0.13003	0.991255	1951	3	4.0637
Olfr435	3	0.10283	0.20888	0.992919	3843	2	-0.92974	0.035077	0.10472	0.991255	1952	1	-0.92974
Galnt6	4	0.90892	0.91514	0.992919	17655	0	3.7003	0.035089	0.13003	0.991255	1953	3	3.7003
1700067K01Rik	3	0.93025	0.91661	0.992919	18072	0	4.2575	0.035117	0.10472	0.991255	1954	3	4.2575
Gm15023	4	0.74804	0.7649	0.992919	14625	1	4.6441	0.035123	0.13003	0.991255	1955	3	4.6441
Pmp22	4	0.54585	0.63049	0.992919	11392	1	0.83982	0.035127	0.13003	0.991255	1956	2	0.83982
Ccl4	4	0.54169	0.62446	0.992919	11338	1	0.0097561	0.035182	0.13003	0.991255	1957	2	0.0097561
Suv39h2	3	0.41211	0.4823	0.992919	9791	1	-1.0211	0.035199	0.10523	0.991255	1958	1	-1.0211
Synj1	3	0.96478	0.95247	0.992919	18704	0	4.8299	0.035217	0.10523	0.991255	1959	3	4.8299
Ins2	4	0.029898	0.10685	0.992919	1415	1	4.4106	0.035261	0.13044	0.991255	1960	3	4.4106
Rassf10	4	0.12115	0.26088	0.992919	4267	2	-1.1593	0.03529	0.13044	0.991255	1961	1	-1.1593
Fgf6	4	0.81187	0.82431	0.992919	15828	0	3.848	0.035306	0.13044	0.991255	1962	3	3.848
Glod4	4	0.88438	0.88427	0.992919	17227	0	0.15538	0.035345	0.13044	0.991255	1963	1	0.15538
Zar1l	4	0.40205	0.54907	0.992919	9699	1	4.2272	0.035387	0.13044	0.991255	1964	3	4.2272
Eri3	4	0.33331	0.50542	0.992919	8707	1	0.3982	0.035399	0.13044	0.991255	1965	2	0.3982
Dgkd	4	0.91415	0.92511	0.992919	17762	0	5.1833	0.035399	0.13044	0.991255	1966	3	5.1833
Il24	4	0.26823	0.45421	0.992919	7434	2	2.779	0.035421	0.13044	0.991255	1967	2	2.779
Me3	4	0.90447	0.91178	0.992919	17561	0	4.0208	0.035431	0.13044	0.991255	1968	3	4.0208
Cyp4f16	3	0.96455	0.95083	0.992919	18703	0	2.0066	0.035449	0.10709	0.991255	1969	3	2.0066
Gm14496	3	0.29178	0.40825	0.992919	7885	1	5.3197	0.035483	0.10709	0.991255	1970	2	5.3197
Vps11	4	0.88409	0.88427	0.992919	17219	0	3.7984	0.035488	0.13044	0.991255	1971	3	3.7984
Ppwd1	2	0.47321	0.49222	0.992919	10490	1	4.6647	0.035488	0.077618	0.991255	1972	1	4.6647
Hrg	4	0.42584	0.55969	0.992919	9927	1	3.7545	0.035559	0.13044	0.991255	1973	3	3.7545
2810007J24Rik	4	0.93611	0.94039	0.992919	18169	0	0.69111	0.035562	0.13044	0.991255	1974	3	0.69111
Ankib1	3	0.96443	0.95083	0.992919	18701	0	2.1897	0.035567	0.10709	0.991255	1975	3	2.1897
Fbxw19	4	0.65923	0.70807	0.992919	13115	1	4.5181	0.035602	0.13044	0.991255	1976	3	4.5181
Igf2bp3	4	0.035893	0.11663	0.992919	1650	2	-0.7559	0.035671	0.13044	0.991255	1977	2	-0.7559
Cidec	4	0.16364	0.3229	0.992919	5245	1	3.2712	0.035671	0.13044	0.991255	1978	3	3.2712
Pgam2	4	0.9643	0.96074	0.992919	18699	0	4.3851	0.035698	0.13044	0.991255	1979	4	4.3851
Thbd	4	0.90387	0.91046	0.992919	17549	0	4.083	0.035792	0.13085	0.991255	1980	3	4.083
Ephb3	3	0.39814	0.47135	0.992919	9655	1	5.8893	0.035803	0.10934	0.991255	1981	2	5.8893
Col3a1	4	0.96419	0.96074	0.992919	18698	0	2.0966	0.035813	0.13085	0.991255	1982	4	2.0966
Igdcc3	4	0.40309	0.55041	0.992919	9705	1	3.7733	0.035817	0.13085	0.991255	1983	3	3.7733
Ap5m1	4	0.12423	0.26242	0.992919	4343	1	4.1779	0.035834	0.13085	0.991255	1984	3	4.1779
Rho	4	0.84603	0.85079	0.992919	16523	0	4.4553	0.035847	0.13085	0.991255	1985	3	4.4553
Hmgcr	3	0.96411	0.95001	0.992919	18697	0	3.402	0.035885	0.10934	0.991255	1986	3	3.402
Gsto1	4	0.83362	0.8442	0.992919	16282	0	4.7593	0.035887	0.13111	0.991255	1987	3	4.7593
Srgap1	4	0.9641	0.96036	0.992919	18696	0	1.4378	0.035896	0.13111	0.991255	1988	4	1.4378
Slc12a4	4	0.91664	0.9269	0.992919	17809	0	3.2058	0.035906	0.13111	0.991255	1989	3	3.2058
Dnajc22	4	0.76782	0.77892	0.992919	14970	1	4.3982	0.035916	0.13111	0.991255	1990	3	4.3982
Clstn3	4	0.90942	0.91576	0.992919	17673	0	4.6702	0.035951	0.13138	0.991255	1991	3	4.6702
Nipsnap1	4	0.5387	0.61979	0.992919	11281	1	0.35511	0.035997	0.13138	0.991255	1992	3	0.35511
Smr2	4	0.81187	0.82431	0.992919	15840	0	4.5711	0.036014	0.13182	0.991255	1993	3	4.5711
Ugt1a9	4	0.23211	0.41624	0.992919	6726	2	2.9495	0.036044	0.13182	0.991255	1994	2	2.9495
Uck2	3	0.96395	0.95001	0.992919	18695	0	3.6187	0.036049	0.10934	0.991255	1995	3	3.6187
Olfr1264	4	0.6024	0.67337	0.992919	12247	1	0.75393	0.036051	0.13182	0.991255	1996	2	0.75393
Ankub1	4	0.2336	0.41624	0.992919	6760	2	2.7044	0.036125	0.13447	0.991255	1997	2	2.7044
Nmb	4	0.95956	0.95692	0.992919	18617	0	4.3094	0.036136	0.13447	0.991255	1998	4	4.3094
Agxt	4	0.94312	0.94719	0.992919	18296	0	4.259	0.036155	0.13447	0.991255	1999	3	4.259
[truncated: 17,394 more rows]
