# Supplementary material for: Reciprocal, methylation-dependent binding of Zfp57 and Gzf1 safeguards Dlk1-Dio3 imprinting during developmental reprogramming
Source: Research Square preprint supplement (doi:10.21203/rs.3.rs-7243168/v1), 2025-09-22
Supplement: Supplementary file 4 [file 3726aa8c47724f0d153370ca.xlsx]

## Sheet: YST_21904_protein_report_exc_OE
Protein Accession	Gene	Organism	Protein Full Name	Number of Peptides	Number of Unique Peptides	Student's T-test p-value OE vs V6.5	Fold change OE/V6.5	OE_2	OE_3	OE_4	V6_5_1	V6_5_2	V6_5_3	V6_5_4	Protein Decoy/Contaminant/Target	Number of PSMs	Number of Proteins in Group	Student's T-test q-value OE_V6_5	Student's T-test Difference OE_V6_5	Protein Unmodified Mass	Unique Peptides	Shared Peptides	Sequence Coverage Fraction	Protein QValue	Best Peptide Score	Best Peptide Notch QValue
Q61985	Nfe2l1	Mus musculus	Endoplasmic reticulum membrane sensor NFE2L1	1	1	9.81621e-05	0.131181	44765.9	26212.9	46176.7	334527	279516	232895	317958	T	1	1	0.088	-2.93037	81525.2	EDTWSGEGAEALAR		0.01889	0.00791066	8.04965	0.000681047
Q9R190	Mta2	Mus musculus	Metastasis-associated protein MTA2	14	13	0.000231992	1.23337	1.62835e+06	1.61528e+06	1.52908e+06	1.32558e+06	1.24866e+06	1.28165e+06	1.30291e+06	T	41	1	0.082	0.302605	74982.7	GHLSRPEAQSLSPYTTSANR|DITLFHAMDTLQR|TPTQLEGAAR|ALDCSSSIRQPSLHMSAAAASR|TLLADQGEIR|NRQTFLLQTTK|LPLATIVK|QFESLPATHIR|EFEEESKQPGVSEQQR|GLGGIMVK|YGGLKTPTQLEGAAR|VWDPDNPLTDR|VGDYVYFENSSSNPYLVR	QPSLHMSAAAASR	0.24401	0	15.197	0
O70310	Nmt1	Mus musculus	Glycylpeptide N-tetradecanoyltransferase 1	2	1	0.000574691	0.115731	58169.5	33479	37493.6	250196	530973	495313	258547	T	12	1	0.197333	-3.11116	56851.9	AIELFSVGQGPAK	VAPVLIR	0.04032	0	14.1994	0
P16125	Ldhb	Mus musculus	L-lactate dehydrogenase B chain	7	5	0.000732985	1.23137	802389	862265	783823	643465	665733	656798	683662	T	48	1	0.26	0.300269	36549	SADTLWDIQKDLKDL|IVADKDYSVTANSK|LKDDEVAQLRK|IVVVTAGVR|GLTSVINQK	VIGSGCNLDSAR|QQEGESRLNLVQR	0.2485	0	12.2435	0
Q9CZU4	Eral1	Mus musculus	GTPase Era, mitochondrial	2	2	0.000867095	1.6148	862446	955059	894681	568198	481468	618034	579005	T	14	1	0.2336	0.691359	48156.6	VVLLGAPNAGK|YCAGLVR		0.04119	0.000503778	9.11839	4.14662e-05
Q9JJY4	Ddx20	Mus musculus	Probable ATP-dependent RNA helicase DDX20	11	11	0.00164131	1.23479	1.62317e+06	1.5824e+06	1.54605e+06	1.27445e+06	1.19225e+06	1.31614e+06	1.35258e+06	T	34	1	0.35	0.304272	91652.6	HYTGPEAQTGNPQNGFVR|IKQLIELDYLNPGSIR|AQHLADILSSK|NTSASALSARPK|NSVQTSVEDSSSNSQHQAK|AAAPVQAVEPTPASPWTQR|VLISTDLTSR|IPCLSSFK|AAGFERPSPVQLK|YMRDPTFVR|QLIELDYLNPGSIR		0.16364	0	16.1948	0
Q9D5T0	Atad1	Mus musculus	Outer mitochondrial transmembrane helix translocase	2	2	0.00165604	1.46731	208862	184405	181003	133176	116518	142684	129760	T	2	1	0.307429	0.553172	40718	EYVNSTSEESHDEDEIRPVQQQDLHR|HLFENSR		0.09141	0.00827586	8.0415	0.000715741
P01863|P01865|P84751	Ighg|Igh-1a|	Mus musculus	Ig gamma-2A chain C region, A allele|Ig gamma-2A chain C region, membrane-bound form|Ig heavy chain Mem5	1	0	0.00168298	0.391968	1.98477e+06	1.62607e+06	2.68484e+06	5318797	5571932	4.20596e+06	6048823	T	8	3	0.269	-1.35119	36366.18968309996|43920.990605587016|25333.368609834753		GYFPEPVTLTWNSGSLSSGVHTFPAVLQSDLYTLSSSVTVTSSTWPSQSITCNVAHPASSTK	0.18788|0.15578|0.2616	0	16.1899	0
P28352	Apex1	Mus musculus	DNA-(apurinic or apyrimidinic site) endonuclease	6	6	0.00186401	0.534617	799526	865845	997909	1.73109e+06	1.99612e+06	1.53455e+06	1.40981e+06	T	38	1	0.262222	-0.903422	35468.1	CSENKLPAELQELPGLTHQYWSAPSDKEGYSGVGLLSR|KPLVLCGDLNVAHEEIDLRNPK|GLDWVKEEAPDILCLQETK|ICSWNVDGLR|NAGFTPQER|VSYGIGEEEHDQEGR		0.35647	0	17.2278	0
Q4VBD9	Gzf1	Mus musculus	GDNF-inducible zinc finger protein 1	33	33	0.00199252	2.87961	6095811	8842080	4462599	2413839	2.28535e+06	1840527	2.14271e+06	T	117	1	0.2392	1.52587	79482.4	LLGHLCDVTVSIENQGVHEDFMAHK|CLDLSETCLQLKK|ASVPGEDAHSNGLVDSSDYPIER|SAEEAAENDKCPQDQSPDNER|HTSIHDKNTPWK|QFTQVNALQR|SSPLNLLHEMHELR|SFLVIVDGSPK|VRVEEDRVQQMLEVAEK|LGNGLSPETPSKK|NDEGHKTEQPDDEYASPK|KVFVEIPK|VHTGERPYCCDQCGK|HVLQVHEGGGER|FFKEVFLNEK|IHTGEKPYMCNACGR|CDTCGQTFANR|SAEEAAENDKCPQDQSPDNERMETEPAAK|NSLYQHIK|SNFQCTVCDKAFLYEK|SNFQCTVCDK|VHTGERPFVCDECGAR|CHTGERPFMCETCGK|IHTGSKPFKCEVCLR|FTQNHMLIYHKR|CLDLS…		0.54816	0	18.1244	0
O09130	Nfatc2ip	Mus musculus	NFATC2-interacting protein	4	4	0.00205659	0.722179	455565	473256	520432	731228	662706	608420	674827	T	12	1	0.225091	-0.469573	45093.4	LLDPGEAPVVPVYSGK|VQSSLNLIPDNSSLLK|LSFFFDGTK|ILLLFGESELSPTATPSTLK		0.14806	0	10.3573	0
P63168	Dynll1	Mus musculus	Dynein light chain 1, cytoplasmic	6	4	0.00241673	1.28583	1.66916e+06	1.70491e+06	1.67378e+06	1.42921e+06	1.27098e+06	1.34404e+06	1.20085e+06	T	54	1	0.243333	0.362696	10359.1	NADMSEEMQQDSVECATQALEK|YNIEKDIAAHIK|YNIEKDIAAHIKK|DIAAHIK	YNPTWHCIVGR|KYNPTWHCIVGR	0.52809	0	18.3636	0
O35683	Ndufa1	Mus musculus	NADH dehydrogenase [ubiquinone] 1 alpha subcomplex subunit 1	1	1	0.00255785	2.94479	155993	145194	139119	42567.8	71938.8	57939.8	34621.4	T	1	1	0.241538	1.55817	8133.23	VQYQWYLMER		0.14286	0	10.2551	0
Q9D1I6	Mrpl14	Mus musculus	Large ribosomal subunit protein uL14m	4	4	0.00266898	0.623667	564836	444290	499643	878338	863632	697195	784348	T	12	1	0.230571	-0.681152	15864.4	VGDQILLAIR|VVDNSALGSTPYHRPPR|IKIPIPTSLR|VLAIAQNFV		0.31724	0	12.1048	0
P63028	Tpt1	Mus musculus	Translationally-controlled tumor protein	11	10	0.0031227	1.0932	4.78133e+06	4806509	4.73644e+06	4270022	4.27218e+06	4520489	4.41273e+06	T	91	1	0.229333	0.12856	19449.5	DLISHDELFSDIYK|DLISHDELFSDIYKIR|IREIADGLCLEVEGK|MIIYRDLISHDELFSDIYKIR|MIIYRDLISHDELFSDIYK|GKLEEQKPER|EIADGLCLEVEGK|YIKDYMK|TEGAIDDSLIGGNASAEGPEGEGTESTVVTGVDIVMNHHLQETSFTK|DGLEMEKC	VKPFMTGAAEQIK	0.69186	0	21.3658	0
P01631		Mus musculus	Ig kappa chain V-II region 26-10	9	9	0.00348943	0.467092	217519488	186066224	254074304	609126656	499713632	385128672	400736640	T	937	1	0.24525	-1.09822	12265.2	FSGVPDRFSGSGSGTDFTLK|VSNRFSGVPDRFSGSGSGTDFTLK|FSGSGSGTDFTLKISR|FSGSGSGTDFTLK|FSGVPDRFSGSGSGTDFTLKISR|VSNRFSGVPDR|LLIYKVSNR|LLIYKVSNRFSGVPDR|FSGVPDR		0.28319	0	33.2612	0
P97386	Lig3	Mus musculus	DNA ligase 3	5	5	0.0035052	1.44863	527359	486116	515764	357609	297159	381440	377350	T	20	1	0.233882	0.534688	113000	ASDLADMINR|VLHNEQEVEKDPGR|VLLDVFTGVR|KGDHFSYFSR|NLQDVVER		0.05123	0	11.0978	0
P01868|P01869	Ighg1|Ighg1	Mus musculus	Ig gamma-1 chain C region secreted form|Ig gamma-1 chain C region, membrane-bound form	29	0	0.00368615	0.500267	134356736	129504688	188311808	352554368	319503168	248294960	277813856	T	4931	2	0.225556	-0.99923	35681.74815701213|43358.69501545975		VTCVVVDISKDDPEVQFSWFVDDVEVHTAQTQPR|SVSELPIMHQDWLNGKEFK|TTPPSVYPLAPGSAAQTNSMVTLGCLVK|DKVSLTCMITDFFPEDITVEWQWNGQPAENYK|DDPEVQFSWFVDDVEVHTAQTQPR|VTCVVVDISKDDPEVQFSWFVDDVEVHTAQTQPREEQFNSTFR|DCGCKPCICTVPEVSSVFIFPPKPK|SNWEAGNTFTCSVLHEGLHNHHTEK|SVSELPIMHQDWLNGK|VSLTCMITDFFPEDITVEWQWNGQPAENYK|CRVNSAAFPAPIEK|APQVYTIPPPKEQMAK|PSETVTCNVAHPASSTK|APQVYTIPPPK|VNSAAFPAPIEK|DVLTITLTPK|APQVYTIPPPKEQMAKDK|VTCVVVDI…	0.81173|0.66921	0	37.2695	0
P56652|Q61704	ITIH3|Itih3	Bos taurus|Mus musculus	Inter-alpha-trypsin inhibitor heavy chain H3	1	0	0.00377909	0.785166	60274.8	56259.8	50271.9	73108.8	70893.8	70440.3	68123.9	C	3	2	0.226737	-0.34893	99488.61901170663|99295.67722034673		EVSFDVELPK	0.01122|0.01125	0.000503778	9.06508	5.37324e-05
P25206	Mcm3	Mus musculus	DNA replication licensing factor MCM3	34	34	0.00434392	1.22234	9912897	10070552	8919831	7709645	7523546	8304304	7.96689e+06	T	219	1	0.2668	0.289643	91489.2	AALLEVFQEAHEQSVGMLHLTESINR|TDDSQEKTDDSQETQDSQKVELSEPR|NREEPFSSEEIQACLSR|LLNNAFEELVAFQR|TPMENIGLQDSLLSR|IIKPTLTQESAAYIAEEYSR|EAQRDYLDFLDDEEDQGIYQNK|SVDVILDDDLVDKVKPGDR|AILCLLLGGVER|ALKDFVASIDATYAK|AGTVVLDDVELR|GDINILLIGDPSVAK|DHQTITIQEMPEKAPAGQLPR|GVVCIDEFDKMSDMDR|RLEAGAMVLADR|TAIHEVMEQGR|DIQPAFSADDIAK|CSVLAAANPVYGR|SKDVFEQLAR|GVVCIDEFDKMSDMDRTAIHEVMEQGR|LIVSVNDLR|APGEQDGDALPLGSSVDILATDDPDFTQDDQQD…		0.55911	0	20.3482	0
P14152	Mdh1	Mus musculus	Malate dehydrogenase, cytoplasmic	7	7	0.00481915	0.746295	1288564	1.48094e+06	1.45028e+06	1.70938e+06	2.03176e+06	1.99766e+06	1.80546e+06	T	19	1	0.294857	-0.422182	36488.1	VIVVGNPANTNCLTASK|FVEGLPINDFSR|LGVTADDVK|EVGVYEALKDDSWLKGEFITTVQQR|DLDVAVLVGSMPR|SAPSIPKENFSCLTR|AIADHIR		0.29341	0	14.4536	0
Q61655	Ddx19a	Mus musculus	ATP-dependent RNA helicase DDX19A	10	9	0.00488399	1.27836	1.46895e+06	1.54511e+06	1.531e+06	1.05979e+06	1.20666e+06	1.29718e+06	1.18807e+06	T	40	1	0.282727	0.354289	53898.8	LKPQLLQGVYAMGFNRPSK|SNLVDNTNQVEVLQRDPSSPLYSVK|GLAVNMVDSK|HSMNILNR|SMSSLQIKEEK|VKADTNGVIK|TASWLAAELSK|VVPDPNIIK|TSTTAEKTEEEEKEDR	TAAFVLAMLSR	0.27197	0	13.4467	0
Q9CPR4	Rpl17	Mus musculus	Large ribosomal subunit protein uL22	19	17	0.00513788	1.43809	21295450	18208910	20027962	13308212	11958901	15440015	14633336	T	254	1	0.294261	0.524151	21383.4	NAESNAELKGLDVDSLVIEHIQVNK|NAESNAELKGLDVDSLVIEHIQVNKAPK|SAEFLLHMLK|GLDVDSLVIEHIQVNKAPK|GLDVDSLVIEHIQVNK|INPYMSSPCHIEMILTEK|EQIVPKPEEEVAQK|YSLDPENPTK|YLKDVTLKK|NAESNAELK|VRYSLDPENPTK|QWGWTQGR|QWGWTQGRWPK|EQIVPKPEEEVAQKK|YLKDVTLK|RYNGGVGR|KQCVPFR	KSAEFLLHMLK|INPYMSSPCHIEMILTEKEQIVPKPEEEVAQK	0.6413	0	22.2828	0
Q9WTQ8	Timm23	Mus musculus	Mitochondrial import inner membrane translocase subunit Tim23	1	1	0.00535271	3.09437	115824	116381	119222	63913.2	36279.9	37349.1	23707.5	T	2	1	0.293333	1.62965	21964.1	NVQILNMVTR		0.04785	0	10.1103	0
Q920A7	Afg3l1	Mus musculus	AFG3-like protein 1	2	1	0.00583792	1.46374	96879.5	79241.6	74478.5	56725.2	58335.7	61737	50602.7	T	3	1	0.31392	0.549661	86991.8	HLSPSVQER	HFEQAIER	0.02155	0.00747314	8.30726	0.000660665
Q99J62	Rfc4	Mus musculus	Replication factor C subunit 4	11	11	0.00607913	1.24105	1.63408e+06	1.83476e+06	1.52487e+06	1.32389e+06	1.32353e+06	1.31627e+06	1.38684e+06	T	37	1	0.312	0.311564	39841.8	NLIDEGHAATQLVNQLHDAIIENENLSDKHK|LLDIAEKENVK|AITFLQSATR|FKPLSDKIQQER|ELFGPELFR|IVILDEADSMTSAAQAALRR|VKNFAQLTVSGSR|NFAQLTVSGSR|TSTILAAAR|KSLEGADLPNLLFYGPPGTGK|IIEPLTSR		0.3956	0	12.1327	0
O70194	Eif3d	Mus musculus	Eukaryotic translation initiation factor 3 subunit D	24	23	0.00634332	1.13486	7.47421e+06	7.7141e+06	7915360	6652637	6.47487e+06	7.10462e+06	6921990	T	136	1	0.316296	0.182511	63948.4	NLAMEATYINHNFSQQCLR|YNFPNPNPFVEDDMDKNEIASVAYR|YLEVSEPQDIECCGALEYYDKAFDR|CEHDGVMTGANGEVSFINIK|ERYNFPNPNPFVEDDMDKNEIASVAYR|FMTPVIQDNPSGWGPCAVPEQFR|RIFHTVTTTDDPVIRK|IFHTVTTTDDPVIR|LGDDIDLIVR|NMVQFNLQTLPK|HCNGVDWR|SVYSWDIVVQR|VADWTGATYQDKR|TQGNVFATDAILATLMSCTR|YLILKDPNKQVIR|GAVIATELKNNSYK|RIFHTVTTTDDPVIR|IFHTVTTTDDPVIRK|WKLGDDIDLIVR|DMPYQPFSKGDR|GAVIATELK|DMPYQPFSK|TLNEWDSR	SDWEVKEEMDFPQLMK	0.49088	0	21.2735	0
Q921I1	Tf	Mus musculus	Serotransferrin	16	15	0.00651758	0.480451	1.17208e+06	1.2001e+06	1.41233e+06	3.20281e+06	3.37071e+06	2.07054e+06	2.09674e+06	T	55	1	0.317857	-1.05754	76673.7	HQTVLDNTEGKNPAEWAK|ASDTSITWNNLK|SKDFQLFSSPLGK|KGTDFQLNQLEGKK|KNNGKEDLIWEILK|DSAFGLLR|LLEACTFHKH|GYYAVAVVK|LYLGHNYVTAIR|SAGWVIPIGLLFCK|WCALSHLER|GTDFQLNQLEGKK|AVSSFFSGSCVPCADPVAFPK|TSYPDCIK|DLLFKDSAFGLLR	CLVEKGDVAFVK	0.25681	0	15.3076	0
P70460	Vasp	Mus musculus	Vasodilator-stimulated phosphoprotein	2	2	0.0068716	0.756492	166886	186506	156369	233119	210747	209074	245186	T	5	1	0.326207	-0.402603	39641.9	MKEEIIEVFVQELR|VQIYHNPTANSFR		0.072	0.000503778	9.15844	4.14662e-05
Q8CHP5	Pym1	Mus musculus	Partner of Y14 and mago	5	5	0.0069469	1.32714	907846	791790	865417	735303	596021	617609	632437	T	11	1	0.320533	0.408325	22676	VKEGYVPQEEVPVYENK|IQAGEVSQPSREQLEK|IQAGEVSQPSR|SKPELPPGLSPEATTPVTPSRPEGGETGLSK|QQQEKEAEALSR		0.37438	0	15.249	0
Q9CWW6	Pin4	Mus musculus	Peptidyl-prolyl cis-trans isomerase NIMA-interacting 4	3	3	0.00701088	0.366921	562196	529697	778289	2.05478e+06	2.4442e+06	1198871	1.3045e+06	T	38	1	0.312129	-1.44646	13806	FSEVATQYSEDKAR|QGGDLGWMTR|IMEAMEK		0.23664	0	13.176	0
Q80SY5	Prpf38b	Mus musculus	Pre-mRNA-splicing factor 38B	11	11	0.00750547	0.497157	2.64156e+06	3.14197e+06	2.88441e+06	6.83411e+06	7700782	4618217	4646886	T	69	1	0.33075	-1.00823	63714.7	QGNVLPLWGNEK|TYHEVVDEIYFK|TAGQTGMCGGVR|KQVMGLITHTDSPYIR|VTHVEPWEK|ALGFMYIR|TMNLNPMILTNILSSPYFK|IPVPVQK|KTAGQTGMCGGVR|DGKEGIEEIDRHVER|NIDQQIK		0.21771	0	13.1903	0
P45952	Acadm	Mus musculus	Medium-chain specific acyl-CoA dehydrogenase, mitochondrial	15	15	0.00754895	1.22844	2.70573e+06	2.86899e+06	2.88285e+06	2.1744e+06	2.13903e+06	2.50879e+06	2373234	T	91	1	0.323152	0.29683	46451.6	AAHKQEPGLGFSFELTEQQKEFQATAR|TRPTVAAGAVGLAQR|AFTGFIVEADTPGIHIGKK|KGDEYVINGQK|ENVLIGEGAGFK|LLVEHQGVSFLLAEMAMK|ANWYFLLAR|GIAFEDVRVPKENVLIGEGAGFK|NTYYASIAK|IAMGAFDR|EEIIPVAPEYDKSGEYPFPLIKR|GIAFEDVRVPK|ELNMGQR|GIAFEDVR|MWITNGGK		0.42043	0	20.1909	0
Q6P5B0	Rrp12	Mus musculus	RRP12-like protein	14	14	0.00770594	1.43164	2.51957e+06	2.75128e+06	2718548	1.87991e+06	1686205	2.24232e+06	1.67952e+06	T	55	1	0.318	0.517668	143041	AMDLAQAGSTVESK|SDLTVDAVKLHNELQSGTLSLGK|LHNELQSGTLSLGK|GRLDPYAYVPLNR|VLATQPGPGR|VLDPASSDFTR|GCEAEADRAEVSR|YQAGGSGIHRPVAK|FCIQEIEK|VTVCQALR|FVQSHLDDLKK|TLLDSLR|SDLTVDAVK|SWLLPVIR		0.10811	0	13.346	0
O09061	Psmb1	Mus musculus	Proteasome subunit beta type-1	3	3	0.00785883	0.522783	317903	535027	463576	939140	897771	725123	740388	T	15	1	0.312229	-0.935715	26355.3	NMQNVEHVPLTLDR|AGGSASAMLQPLLDNQVGFK|LSEGFSIHTR		0.18333	0	10.1595	0
Q9CR80	Fam32a	Mus musculus	Protein FAM32A	5	5	0.00787378	0.661128	562172	633845	688819	1.08788e+06	1.00772e+06	783130	936944	T	21	1	0.303556	-0.596999	13207.1	TPAQAAFEK|GVAELGVTKR|HLDTLTEHYDIPK|GVAELGVTK|QRVEDFNR		0.35714	0	12.1022	0
P32020	Scp2	Mus musculus	Sterol carrier protein 2	4	4	0.0079275	0.68081	285188	361387	298800	487973	521559	406135	434684	T	11	1	0.297838	-0.554676	59087.8	KLEEEGEQFVKK|LQNLQLQPGK|MGFPEAASSFR|EIEKKLEEEGEQFVK		0.06764	0	10.1963	0
Q9WUK2	Eif4h	Mus musculus	Eukaryotic translation initiation factor 4H	4	4	0.00795525	0.590788	457066	612780	585113	930789	1.14254e+06	766256	903385	T	27	1	0.290737	-0.759287	27324.4	GSNMDFREPTEEER|TVATPLNQVANPNSAIFGGARPR|VDIAEGR|AYSSFGGGR		0.21371	0	13.2454	0
Q8K003	Tma7	Mus musculus	Translation machinery-associated protein 7	6	5	0.00804743	0.583233	4951379	4757022	5052968	10750658	9286992	7640665	6632351	T	76	1	0.286462	-0.777856	7061.93	AAGKGPLATGGIKK|AAGKGPLATGGIK|GPLATGGIKK|GPLATGGIK|EMDEEDKAFKQK	EMDEEDKAFK	0.40625	0	20.2512	0
P04815		Bos taurus	Spleen trypsin inhibitor I	2	1	0.00836508	0.468729	591368	468568	836614	1.59406e+06	1.44895e+06	1.03796e+06	1.23059e+06	C	130	1	0.2859	-1.09317	10835.2	RPDFCLEPPYTGPCK	SAEDCMR	0.22	0	22.5406	0
P00761		Sus scrofa	Trypsin	13	8	0.00862385	0.427626	6.84677e+06	7552926	6.62251e+06	25208620	17840464	11572484	13767631	C	290	1	0.283317	-1.22558	24393.8	LGEHNIDVLEGNEQFINAAKIITHPNFNGNTLDNDIMLIKLSSPATLNSR|LSSPATLNSR|APVLSDSSCK|VCNYVNWIQQTIAAN|LGEHNIDVLEGNEQFINAAKIITHPNFNGNTLDNDIMLIK|SSGSSYPSLLQCLK|VATVSLPR|NKPGVYTKVCNYVNWIQQTIAAN	IITHPNFNGNTLDNDIMLIKLSSPATLNSR|IVGGYTCAANSIPYQVSLNSGSHFCGGSLINSQWVVSAAHCYKSR|SCAAAGTECLISGWGNTK|LGEHNIDVLEGNEQFINAAK|IITHPNFNGNTLDNDIMLIK	0.72727	0	33.2889	0
Q9CXI5	Manf	Mus musculus	Mesencephalic astrocyte-derived neurotrophic factor	2	2	0.00907622	0.513222	142249	130208	166972	315880	347687	196398	301094	T	3	1	0.296476	-0.962344	20374.6	QIDLSTVDLKK|KINELMPK		0.10615	0.000997009	9.05472	5.37324e-05
O35344	Kpna3	Mus musculus	Importin subunit alpha-4	6	5	0.00921002	1.19835	520794	444248	485064	420873	398766	405223	385976	T	29	1	0.292372	0.261045	57736.8	AVGNIVTGTDEQTQVVLNCDVLSHFPNLLSHPK|AENPGLENHR|SGILPILVK|HRNEVTVELR|HRNEVTVELRK	KLLSSDRNPPIDDLIK	0.15163	0	12.2334	0
Q99N91	Mrpl34	Mus musculus	Large ribosomal subunit protein bL34m	6	6	0.00940009	0.645349	1.18012e+06	1085219	1378344	2036390	2.22045e+06	1.62943e+06	1.66938e+06	T	38	1	0.293	-0.631849	10524.6	RLSTPAGVQVILR|LSTPAGVQVILR|GNEYQPSNIK|LSTPAGVQVILRR|RLSTPAGVQVILRR|GNEYQPSNIKR		0.27174	0	14.3216	0
Q9CQ49	Ncbp2	Mus musculus	Nuclear cap-binding protein subunit 2	1	1	0.00940954	0.511486	44580.6	47886.4	44074.7	74810.9	132904	74372	84556.7	T	5	1	0.287822	-0.967234	18005.8	TDWDAGFKEGR		0.07051	0	10.0467	0
P09055	Itgb1	Mus musculus	Integrin beta-1	3	3	0.00949293	0.569211	264140	371500	265372	559131	639859	461677	445142	T	10	1	0.284522	-0.812964	88173.3	SAVTTVVNPK|NVLSLTDRGEFFNELVGQQR|LRPEDITQIQPQQLLLK		0.0589	0	10.2259	0
P52503	Ndufs6	Mus musculus	NADH dehydrogenase [ubiquinone] iron-sulfur protein 6, mitochondrial	1	1	0.00957082	0.507904	77855.4	82782.8	72926.6	189818	169370	102074	167341	T	7	1	0.279404	-0.977372	13011.7	IIACDGGGGALGHPK		0.12931	0	10.1619	0
Q99NE5	Rims1	Mus musculus	Regulating synaptic membrane exocytosis protein 1	2	2	0.00963098	0.528557	524395	443189	526979	1.11747e+06	1.213e+06	726727	791075	T	19	1	0.276167	-0.919869	163061	QTTGSGSSQELDHEQYSK|KGSLADVVGHLR		0.02051	0.00289436	8.12065	0.000294499
P84099	Rpl19	Mus musculus	Large ribosomal subunit protein eL19	16	15	0.010094	1.55694	12487673	10395597	13253956	7108220	6800684	9619387	7.54548e+06	T	173	1	0.282939	0.638713	23451.2	VWLDPNETNEIANANSR|KVWLDPNETNEIANANSR|KKVWLDPNETNEIANANSR|KKLLADQAEAR|LLADQAEARR|ILMEHIHK|DGLIIRKPVTVHSR|LLADQAEAR|KLIKDGLIIR|LIKDGLIIR|LQAKKEEIIK|HMYHSLYLK|KIDRHMYHSLYLK|RLASSVLR|RILMEHIHK	MPEKVTWMR	0.5	0	20.3784	0
Q9EPU0	Upf1	Mus musculus	Regulator of nonsense transcripts 1	32	31	0.0104386	1.30288	6053103	6.07137e+06	5.51414e+06	4624620	3.96218e+06	5078008	4.43956e+06	T	119	1	0.28896	0.3817	123889	TVLQRPLSLIQGPPGTGK|SREAIDSPVSFLALHNQIR|LQQLKDETGELSSADEKR|LLGHEVEDVVIK|AGAKPDQIGIITPYEGQR|EAIDSPVSFLALHNQIR|AYQHGGVTGLSQY|EAIIPGSVYDR|SILIDESTQATEPECMVPVVLGAK|TVTSATIVYHLAR|TFAVDETSVSGYIYHK|KLVNTVNPGAR|NMDSMPELQK|FMTTAMYDAR|GNTSGSHIVNHLVR|CFLSWLVK|LKESQTQDNITVR|GIGHVIKVPDNYGDEIAIELR|IAFFTLPK|AGLSQSLFER|ESQTQDNITVR|WDLGLNK|YGVIIVGNPK|QLILVGDHCQLGPVVMCK|ENPSATLEDLEKPGVDEEPQHVLLR|RFTAQGLPDLNHSQVYAVK…	RLNVALTR	0.35943	0	17.1269	0
Q8CFC7	Clasrp	Mus musculus	CLK4-associating serine/arginine rich protein	1	1	0.0106022	0.713467	51922.5	56447.7	46876.6	77690	81105	61622.7	70463.1	T	4	1	0.286588	-0.487082	76778.6	LTRPAASPAVGEK		0.01946	0.000503778	9.19112	4.14662e-05
P63158	Hmgb1	Mus musculus	High mobility group protein B1	16	12	0.0106254	0.571257	3.17623e+06	3.512e+06	3.65421e+06	6.64694e+06	7.8682e+06	4640360	5427982	T	127	1	0.281615	-0.807788	24878.2	KLGEMWNNTAADDKQPYEK|IKGEHPGLSIGDVAK|RPPSAFFLFCSEYRPK|KHPDASVNFSEFSK|KHPDASVNFSEFSKK|HPDASVNFSEFSKK|IKGEHPGLSIGDVAKK|GEHPGLSIGDVAK|LGEMWNNTAADDKQPYEK|GKFEDMAK|LGEMWNNTAADDKQPYEKK|EKGKFEDMAK	MSSYAFFVQTCR|MSSYAFFVQTCREEHKK|YEKDIAAYR|EKYEKDIAAYR	0.48372	0	17.1972	0
Q7TNC4	Luc7l2	Mus musculus	Putative RNA-binding protein Luc7-like 2	29	18	0.0106473	0.393908	5223321	6408948	5.30141e+06	20286430	19541650	9987075	10462841	T	390	1	0.277132	-1.34407	46554.7	SHLLNCCPHDVLSGTR|LAETQEEISAEVAAK|VEQLGAEGNVEESQKVMDEVEK|ADYEIASKEQDFFFELDAMDHLQSFIADCDRR|VEQLGAEGNVEESQK|RLAETQEEISAEVAAK|LAETQEEISAEVAAKAER|EQDFFFELDAMDHLQSFIADCDRR|LHLGFIEIR|AERVHELNEEIGK|VHDLALRADYEIASK|VHDLALR|IKFSDDRVCK|LADHFGGKLHLGFIEIR|IKFSDDR|FSDDRVCK|VMDEVEKAR|KREAEEVYR	VEQLGAEGNVEESQKVMDEVEKAR|VHELNEEIGKLLAK|VHELNEEIGK|MDLGECLKVHDLALR|AMLDQLMGTSR|LRVCEVCSAYLGLHDNDRR|VCEVCSAYLGLHDNDR|VCEVCSAYLGLHDNDRR|NSMPASSFQQQK|ADYEIASK|MDLGECLK	0.5051	0	21.3122	0
Q9CR57	Rpl14	Mus musculus	Large ribosomal subunit protein eL14	13	9	0.0106643	1.57064	19536818	17635272	15290768	10578732	9516095	13984337	10699909	T	210	1	0.273259	0.651352	23549.2	AAIAAAAAAAAAK|LVAIVDVIDQNR|VAYISFGPHAGKLVAIVDVIDQNR|GQKTPAQKAPAPK|VAYISFGPHAGK|RYVEVGR|AWEKADINTK|ALVDGPCTR|RQAMPFK	KAWEKADINTK|CMQLTDFILKFPHSAR|CMQLTDFILK|MTDFDRFK	0.4977	0	18.4372	0
Q9D6S7	Mrrf	Mus musculus	Ribosome-recycling factor, mitochondrial	2	2	0.0107344	0.579872	225965	149137	153064	274982	364127	281492	279671	T	3	1	0.271564	-0.786194	29032.5	QISQMADDTVAELDQHLAAK|TAPGSLDHITVVTADGK		0.14122	0	11.1869	0
P12970	Rpl7a	Mus musculus	Large ribosomal subunit protein eL8	28	27	0.0108916	1.42731	23733908	21730996	24918518	16220585	13658978	19209572	17043074	T	318	1	0.275643	0.513302	29958	KTCTTVAFTQVNSEDKGALAK|AQLVVIAHDVDPIELVVFLPALCR|KAQLVVIAHDVDPIELVVFLPALCR|TCTTVAFTQVNSEDKGALAK|LKVPPAINQFTQALDR|VPPAINQFTQALDR|HWGGNVLGPK|KMGVPYCIIK|AGVNTVTTLVENK|AGVNTVTTLVENKK|KVAPAPAVVK|RHWGGNVLGPK|NFGIGQDIQPK|LKVPPAINQFTQALDRQTATQLLK|VAPAPAVVK|TNYNDRYDEIR|RLKVPPAINQFTQALDR|NFGIGQDIQPKR|TNYNDRYDEIRR|QTATQLLK|VVNPLFEK|KVVNPLFEK|AKELATKLG|GDVPTKRPPVLR|LAHKYRPETK|VPPAINQFTQALDRQTATQLLK|VAPAPAVVKK	MGVPYCIIK	0.67293	0	24.3933	0
Q80ZK9	Wdtc1	Mus musculus	WD and tetratricopeptide repeats protein 1	5	5	0.0111775	1.37048	451489	432937	516863	318537	326390	402226	318966	T	9	1	0.278105	0.454676	75684.4	LWNPRPESEDLTGR|APHNAMLYGNR|KDSISEDEMVLR|ILITGAADSK|QSPSAGVHTFCDR		0.08863	0.000503778	10.1329	4.14662e-05
Q07133	H1-6	Mus musculus	Histone H1t	7	2	0.0112778	1.75595	412895	380953	320547	244000	151897	232653	227215	T	74	1	0.275862	0.812254	21527.1	AGMSLAALKK|LVNKGVLVQTK	KALAAAGYDVEKNNSR|ALAAAGYDVEKNNSR|ALAAAGYDVEK|KALAAAGYDVEK|GTGASGSFK	0.21635	0	23.3405	0
P62274	Rps29	Mus musculus	Small ribosomal subunit protein uS14	6	3	0.011333	0.487918	9731556	10236668	10187026	25353812	28429948	15827644	15772309	T	208	1	0.274169	-1.03529	6672.3	GHQQLYWSHPR|GHQQLYWSHPRK|DIGFIKLD	KYGLNMCR|YGLNMCR|MGHQQLYWSHPR	0.51786	0	14.398	0
Q6NSQ7	Ltv1	Mus musculus	Protein LTV1 homolog	9	8	0.0114704	0.603813	1.85049e+06	1652929	1671116	3.35025e+06	3500353	2.30853e+06	2.44679e+06	T	66	1	0.272467	-0.727827	53989.7	SQRDPLAADETAPQR|RNEQLTLHDERFEK|HLFWEEETK|HLFWEEETKSR|FTEYSMTSSVMR|TGIPLNVLPK|VLLPTQK|NEQLTLHDERFEK	MQMINGSDLPK	0.17021	0	17.3218	0
Q60972	Rbbp4	Mus musculus	Histone-binding protein RBBP4	10	2	0.0116987	1.21708	1738227	1.53635e+06	1.55412e+06	1.28584e+06	1.42381e+06	1.22482e+06	1.35558e+06	T	75	1	0.272721	0.283419	47626.1	IGEEQSPEDAEDGPPELLFIHGGHTAK|TPSSDVLVFDYTKHPSKPDPSGECNPDLR	ADKEAAFDDAVEER|LNVWDLSK|RLNVWDLSK|TVALWDLR|VINEEYKIWK|VINEEYK|LMIWDTR|VINEEYKIWKK	0.24706	0	20.2272	0
Q6ZWU9	Rps27	Mus musculus	Small ribosomal subunit protein eS27	5	2	0.0117067	1.61287	1.10397e+06	1.08036e+06	1.08989e+06	521617	629832	826208	772352	T	68	1	0.268323	0.689634	9454.84	DLLHPSPEEEKRK|DLLHPSPEEEKR	LVQSPNSYFMDVK|LTEGCSFR|ARLTEGCSFR	0.42857	0	15.2059	0
Q6ZWV3	Rpl10	Mus musculus	Large ribosomal subunit protein uL16	23	3	0.0117297	1.45737	10702753	10090703	9576865	6.73757e+06	5623194	8.00453e+06	7.64579e+06	T	307	1	0.264825	0.543365	24587.9	FNADEFEDMVAEK|WGFTKFNADEFEDMVAEKR|YIPNRGPLDKWR	VDEFPLCGHMVSDEYEQLSSEALEAAR|AKVDEFPLCGHMVSDEYEQLSSEALEAAR|RLIPDGCGVK|FNADEFEDMVAEKR|VHIGQVIMSIR|MLSCAGADRLQTGMR|IRIFDLGR|TKLQNKEHVIEALR|EHVIEALRR|VRLHPFHVIR|GAFGKPQGTVAR|MLSCAGADR|SCGKDGFHIR|LQNKEHVIEALRR|GPLDKWR|EHVIEALR|LIPDGCGVK|LQNKEHVIEALR|LHPFHVIR|ICANKYMVK	0.74299	0	22.4058	0
Q3UHX2	Pdap1	Mus musculus	28 kDa heat- and acid-stable phosphoprotein	9	8	0.0119921	0.473328	1.48196e+06	1.65064e+06	1824771	4706165	4.44465e+06	2.60266e+06	2689623	T	67	1	0.266875	-1.07909	20592.5	KVTQLDLDGPKELSR|KGVEGLIDIENPNR|GVEGLIDIENPNR|KVTQLDLDGPK|VTQLDLDGPKELSR|VRQYTSPEEIDAQLQAEK|VTQLDLDGPK|VTQLDLDGPKELSRR	MQSLSLNK	0.30939	0	16.3864	0
Q9Z2W0	Dnpep	Mus musculus	Aspartyl aminopeptidase	2	2	0.0123484	0.679598	128663	142571	126335	210235	224344	154687	197059	T	3	1	0.272369	-0.557247	52173.8	SPSPFHVVAECR|GFFELFPSVSR		0.04863	0.00243072	8.16989	0.000174364
Q9DB98	Leng1	Mus musculus	Leukocyte receptor cluster member 1 homolog	1	1	0.0123876	0.392384	23032.1	28944.3	30146.7	81679.8	112400	51261.6	48977.4	T	2	1	0.269758	-1.34966	30450.9	VLLAQQEAR		0.03448	0.00335731	8.11835	0.000301882
Q9R0P3	Esd	Mus musculus	S-formylglutathione hydrolase	4	4	0.0127265	0.732887	839228	996365	1.14944e+06	1.38108e+06	1.42829e+06	1.30651e+06	1.2757e+06	T	19	1	0.272657	-0.448337	31299.3	VFEHSSVELK|AYDATCLVK|AFSGYLGPDESKWK|KIPVVFR		0.14184	0	10.151	0
Q9CXG3	Ppil4	Mus musculus	Peptidyl-prolyl cis-trans isomerase-like 4	15	14	0.0128698	0.48204	2491101	2.95998e+06	2.93374e+06	7.42024e+06	7.76929e+06	4531703	4.27309e+06	T	125	1	0.271529	-1.05277	57194.6	INETFVDKDFVPYQDIR|GGESIFGQLYGDQASFFEAEKVPR|LNPVTTDEDLEIIFSR|KINETFVDKDFVPYQDIR|IHVDFSQSVAK|DFIIQTGDPTGTGR|TGESLCYAFIEFEKEEDCEK|IGADEEIDDFKGR|SAEEVEEIKAEKEAK|TGESLCYAFIEFEKEEDCEKAFFK|SCEVIRDWK|MDNVLIDDRR|SAEEVEEIKAEK|ACLNFLK	INHTVILDDPFDDPPDLLIPDRSPEPTKEQLDSGR	0.39837	0	18.2594	0
Q3TIV5	Zc3h15	Mus musculus	Zinc finger CCCH domain-containing protein 15	9	9	0.0129675	0.599189	1527816	1.41819e+06	1.62533e+06	3.23911e+06	2.77339e+06	2413204	1.91739e+06	T	48	1	0.269565	-0.738916	48297.4	ELQELNELFKPVVAAQK|DVEETGITVASVER|IDKLEQDMER|IIEDKTFGLK|SVVCAFFK|FGQQNPR|HALPPGFVLKK|EVFEFRPELVNDDDEEADDTR|KQAQAGGSK		0.25117	0	17.1573	0
Q8K2Y7	Mrpl47	Mus musculus	Large ribosomal subunit protein uL29m	4	4	0.0131866	1.41205	402515	391905	469275	285250	251009	324568	336438	T	5	1	0.272229	0.497786	29706.8	SGASWTCQQLR|VVDSMDNVDKVVQEREDALR|GLEEFFDDPKNWGEEKVK|FFAMPYVDR		0.23016	0	11.3559	0
P35293	Rab18	Mus musculus	Ras-related protein Rab-18	3	3	0.0132762	0.815422	350576	421561	401460	490804	478895	446588	498649	T	17	1	0.270761	-0.294382	23020.7	LAIWDTAGQER|ILIIGESGVGK|TLTPSYYR		0.14563	0	13.2652	0
Q3THK7	Gmps	Mus musculus	GMP synthase [glutamine-hydrolyzing]	22	22	0.0133997	1.19926	5916862	5705561	5202597	4.46273e+06	4395984	4.9609e+06	4.88588e+06	T	86	1	0.269611	0.262144	76674.9	GLQKEEIVLLTHGDSVDKVADGFK|ELDLPEELVSRHPFPGPGLAIR|VINAAHSFYNGTTTLPISDEDRTPR|SGNIVAGIANESK|ALNQDQVIAVHIDNGFMR|SGNIVAGIANESKK|ISQMPVILTPLHFDRDPLQKQPSCQR|TLNMTTSPEEK|ELDLPEELVSR|LYGVQFHPEVGLTENGK|IVADFSASVK|NFLYDIAGCSGNFTVQNR|ISQMPVILTPLHFDRDPLQK|THHNDTELIR|VIEPLKDFHKDEVR|IVADFSASVKKPHTLLQR|SVREDGVFNISMDNTCSLFR|VICAEEPYICKDFPETNNILK|IMYDLTSKPPGTTEWE|QADFEAHNILR|KIPGISR|ESQSVEEALKK		0.43723	0	20.3096	0
Q8BMJ3	Eif1ax	Mus musculus	Eukaryotic translation initiation factor 1A, X-chromosomal	11	4	0.0135572	0.556106	564497	706236	669486	1.49373e+06	1367112	978172	899533	T	102	1	0.268658	-0.846568	16450.2	KKVWINTSDIILVGLR|KVWINTSDIILVGLR|MLGNGRLEAMCFDGVKR|LEAMCFDGVK	DYQDNKADVILK|ELVFKEDGQEYAQVIK|AYGELPEHAK|SLKAYGELPEHAK|LEAMCFDGVKR|YNADEAR|DYQDNKADVILKYNADEAR	0.5625	0	15.344	0
P12025	Mdk	Mus musculus	Midkine	1	1	0.0135837	0.548615	106740	91689.7	87672.1	215856	212972	127044	154112	T	9	1	0.265027	-0.866135	15423.8	YNAQCQETIR		0.07143	0	11.1924	0
E9Q8D0	Dnajc21	Mus musculus	DnaJ homolog subfamily C member 21	2	2	0.0138204	1.48481	425130	355128	507780	289615	254260	277783	327555	T	9	1	0.26496	0.570283	61696.2	APSATASLNSVTR|QLVAFIR		0.03766	0	17.4057	0
Q9CR29	Ccdc43	Mus musculus	Coiled-coil domain-containing protein 43	1	1	0.0139096	0.512768	128293	125019	148872	325134	346698	195645	209328	T	6	1	0.262737	-0.963623	25034	NTNVEDVLNAR		0.04955	0	12.2775	0
Q9Z204	Hnrnpc	Mus musculus	Heterogeneous nuclear ribonucleoproteins C1/C2	12	11	0.0139488	1.26534	3.40987e+06	3.77158e+06	3.27922e+06	2.80359e+06	2.41845e+06	2.83541e+06	2.97864e+06	T	81	1	0.259325	0.339521	34363.9	KSDVEAIFSK|GFAFVQYVNER|LKGDDLQAIKK|VFIGNLNTLVVK|VFIGNLNTLVVKK|VDSLLESLEKIEKEQSK|ASNVTNKTDPR|QKVDSLLESLEK|AAVAGEDGR|MYSYPAR|SDVEAIFSK	MIAGQVLDINLAAEPK	0.33866	0	17.2352	0
P10711	Tcea1	Mus musculus	Transcription elongation factor A protein 1	5	5	0.0140119	0.630504	560836	676836	808348	1.22364e+06	1.20306e+06	908219	979502	T	24	1	0.256667	-0.665423	33859	TGGTQTDLFTCGK|NIPMTLELLQSTR|NAAGALDLLK|KQSTDEEVTSLAK|MEDEVVR		0.18605	0	12.2976	0
P62334	Psmc6	Mus musculus	26S proteasome regulatory subunit 10B	26	26	0.0140288	1.13664	10783426	9979618	9606831	8641638	9025262	9262763	8669227	T	196	1	0.25362	0.184775	44145.1	HGEIDYEAIVK|VVSSSIVDKYIGESAR|EVDPLVYNMSHEDPGNVSYSEIGGLSEQIR|VALDMTTLTIMR|ELREVIELPLTNPELFQR|EVIELPLTNPELFQR|DHQPCIIFMDEIDAIGGRR|ALQSVGQIVGEVLK|AVASQLDCNFLK|LSDGFNGADLR|NVCTEAGMFAIR|KIHIDLPNEQAR|GCLLYGPPGTGK|DHQPCIIFMDEIDAIGGR|ADHDFVVQEDFMK|IHAGPITK|QLTEEKFIVK|IHIDLPNEQAR|DKALQDYR|VGIIPPKGCLLYGPPGTGK|FSEGTSADREIQR|RFSEGTSADREIQR|TLMELLNQMDGFDTLHR|EMFNYAR|EQLKELTK|ELREQLKELTK		0.7018	0	19.2377	0
Q07813	Bax	Mus musculus	Apoptosis regulator BAX	1	1	0.01452	0.606123	136096	159146	187860	288312	317875	204596	256670	T	9	1	0.2579	-0.722317	21380.8	TGAFLLQGFIQDR		0.06771	0	14.385	0
Q9CQX4	Pclaf	Mus musculus	PCNA-associated factor	2	2	0.014725	0.501138	69143.3	89771.7	104325	167014	253919	135837	154197	T	3	1	0.258667	-0.99672	11986.1	KVLGSSTFVTNSSSSSR|ESKKENQAPEEAGTSGLGK		0.32727	0	10.2033	0
Q9CQU0	Txndc12	Mus musculus	Thioredoxin domain-containing protein 12	10	9	0.0149482	0.386053	3.9908e+06	5.41586e+06	3.95442e+06	15228329	17419100	7525028	8491285	T	135	1	0.258585	-1.37313	19036.5	FAESTEISELSHNFVMVNLEDEEEPRDEDFSPDGGYIPR|VRPEIINESGNPSYK|YFYVSAEQVVQGMK|YFYVSAEQVVQGMKEAQER|TLEDGKKEAAASGLPLMVIIHK|ILFLDPSGK|EKHFQDEL|LTGDAFR|GFGDHIHWR	EAAASGLPLMVIIHK	0.75294	0	21.3083	0
Q9JJI8	Rpl38	Mus musculus	Large ribosomal subunit protein eL38	8	7	0.0154722	0.609586	9622427	9437426	12964277	20389114	20109388	15097446	14543709	T	264	1	0.265157	-0.714099	8198.72	IEEIKDFLLTAR|YLYTLVITDKEK|YLYTLVITDKEKAEK|LKQSLPPGLAVK|QSLPPGLAVK|YLYTLVITDK|DFLLTAR	KIEEIKDFLLTAR	0.57143	0	22.3612	0
Q8BJW6	Eif2a	Mus musculus	Eukaryotic translation initiation factor 2A	23	22	0.0155697	1.30575	10143630	9575472	10701225	7977554	6.98566e+06	9039520	7.18988e+06	T	152	1	0.26419	0.384877	64362.8	GSEGLYMVNGPPHFTESTVLPR|AIEQLKEQAAAGK|LYQYPNFAGPQAALANK|NAAFYSPHGHILVLAGFGNLR|DGTAGTPNLQLYDMK|YQAVPSEVPSEEPK|SDAAPTPVPQSAPR|NTVTQSASGDPEVDKK|GLLHSFDLPK|VATAYRPPALR|NVNNEVHFFENNNFNTIANK|VNDFNLSPGTQPYK|VAVYVPGSK|APSTPLLTVR|CDPVFDFGTGPR|NVNNEVHFFENNNFNTIANKLHLQK|LISKPVASDSTYFAWCPDGEHILTATCAPR|YQAVPSEVPSEEPKVATAYRPPALR|GQMEVWDVK|VNIINVANK|KMQNWCPSWSDDEIICAR|DGTLFAWSNGEK	LHEEEPPQNMKPHPGSDKPLSK	0.55594	0	20.2354	0
P01837	Igkc	Mus musculus	Immunoglobulin kappa constant	19	14	0.015615	0.504785	141660640	81291536	165526224	268486560	214666912	241352928	261687568	T	1105	1	0.262965	-0.98626	11926.7	RADAAPTVSIFPPSSEQLTSGGASVVCFLNNFYPK|RADAAPTVSIFPPSSEQLTSGGASVVCFLNNFYPKDINVK|HNSYTCEATHKTSTSPIVK|ADAAPTVSIFPPSSEQLTSGGASVVCFLNNFYPK|ADAAPTVSIFPPSSEQLTSGGASVVCFLNNFYPKDINVK|HNSYTCEATHK|DEYERHNSYTCEATHK|QNGVLNSWTDQDSK|IDGSERQNGVLNSWTDQDSK|SFNRNEC|WKIDGSER|TSTSPIVKSFNRNEC|TSTSPIVK|DINVKWK	QNGVLNSWTDQDSKDSTYSMSSTLTLTKDEYER|QNGVLNSWTDQDSKDSTYSMSSTLTLTK|DSTYSMSSTLTLTKDEYER|DSTYSMSSTLTLTKDEYERHNSYTCEATHK|DSTYSMSSTLTLTK	1	0	32.3642	0
Q8VC57	Kctd5	Mus musculus	BTB/POZ domain-containing protein KCTD5	13	12	0.015905	0.536008	6.71957e+06	7.86628e+06	6.60849e+06	19185054	11965796	9740064	13329008	T	168	1	0.264698	-0.899673	26147	AENHCELLPPAPSGLGAGLGGGLCR|LCQADPDLDSDKDETGAYLIDRDPTYFGPVLNYLR|LVINKDLAEEGVLEEAEFYNITSLIK|DLAEEGVLEEAEFYNITSLIK|ELHNTPYGTTSEPSEKAK|LNVGGTYFLTTR|ELHNTPYGTTSEPSEK|RCSAGMGALAQRPGGVSK|AENHCELLPPAPSGLGAGLGGGLCRR|CSAGMGALAQRPGGVSK|FEQLVSIGSSYNYGNEDQAEFLCVVSK|ISQMPVK	VLQCQEEELTQMVSTMSDGWK	0.80769	0	23.472	0
P63087	Ppp1cc	Mus musculus	Serine/threonine-protein phosphatase PP1-gamma catalytic subunit	5	2	0.015909	1.31287	385984	426772	333399	320799	282470	292172	265404	T	12	1	0.261655	0.392725	36959.7	ADIDKLNIDSIIQR|NVQLQENEIR	AHQVVEDGYEFFAKR|IFCCHGGLSPDLQSMEQIRR|AHQVVEDGYEFFAK	0.18266	0	16.1685	0
P62962	Pfn1	Mus musculus	Profilin-1	5	5	0.0161023	0.569223	1.17699e+06	1.97379e+06	1.62845e+06	2.36778e+06	3.2529e+06	2.40798e+06	3027404	T	40	1	0.261727	-0.812934	14947.5	TFVSITPAEVGVLVGKDR|SSFFVNGLTLGGQK|TFVSITPAEVGVLVGK|TLVLLMGK|CYEMASHLR		0.35	0	20.2455	0
Q3TLP5	Echdc2	Mus musculus	Enoyl-CoA hydratase domain-containing protein 2, mitochondrial	2	2	0.0161583	1.19089	310182	357226	331132	276009	259532	282346	299707	T	12	1	0.260809	0.252039	31831.7	ALALAQEILPQAPIAVR|ELGLVNHAVAQNEEGNAAYHR		0.12838	0	16.1849	0
Q9CQP0	Mrpl33	Mus musculus	Large ribosomal subunit protein bL33m	3	3	0.0165871	0.529482	667712	790489	851960	2.03109e+06	1.60533e+06	1.04482e+06	1.28666e+06	T	29	1	0.266356	-0.917346	7411.27	LSLLHYDPIVNKK|LVSQAGTGFSFNHK|LVSQAGTGFSFNHKR		0.43077	0	14.1145	0
P63260	Actg1	Mus musculus	Actin, cytoplasmic 2	40	0	0.0170521	0.727247	1593702	1.17263e+06	1.55041e+06	2.06666e+06	2.08214e+06	1.85693e+06	1.84807e+06	T	929	1	0.273626	-0.459483	41765.8		YPIEHGIVTNWDDMEK|HQGVMVGMGQKDSYVGDEAQSKR|KDLYANTVLSGGTTMYPGIADR|CPEALFQPSFLGMESCGIHETTFNSIMK|FRCPEALFQPSFLGMESCGIHETTFNSIMK|EEEIAALVIDNGSGMCK|VAPEEHPVLLTEAPLNPK|LCYVALDFEQEMATAASSSSLEK|EKLCYVALDFEQEMATAASSSSLEK|TTGIVMDSGDGVTHTVPIYEGYALPHAILR|CDVDIRKDLYANTVLSGGTTMYPGIADR|HQGVMVGMGQKDSYVGDEAQSK|HQGVMVGMGQK|MQKEITALAPSTMK|DLYANTVLSGGTTMYPGIADR|SYELPDGQVITIGNER|LDLAGRDLTDYLMK|EITALAPSTMK|QEYDESGPSIVH…	0.82667	0	26.3127	0
Q6ZWV7	Rpl35	Mus musculus	Large ribosomal subunit protein uL29	6	6	0.0176235	1.34574	30294978	25178510	28604280	20031430	17834190	23598648	22049918	T	114	1	0.280739	0.428404	14543.6	QLDDLKVELSQLR|VLTVINQTQKENLR|VLTVINQTQKENLRK|VLTVINQTQK|YKPLDLRPK|PLDLRPK		0.30081	0	17.2822	0
Q9D7F7	Chmp4c	Mus musculus	Charged multivesicular body protein 4c	2	2	0.0176854	0.463547	98127.2	133722	121510	324845	356980	181197	191997	T	10	1	0.279054	-1.10921	26263.4	AAPSAQEALAR|EALENSHTNTEVLR		0.10776	0	10.0996	0
P97314	Csrp2	Mus musculus	Cysteine and glycine-rich protein 2	10	10	0.0179685	0.481692	2.39934e+06	2.34412e+06	2.6945e+06	5.99289e+06	7845224	3.90538e+06	3.79388e+06	T	91	1	0.280383	-1.05382	20911.8	TVYHAEEVQCDGR|SLESTTLTEKEGEIYCK|NLDSTTVAIHDEEIYCK|LGIKPESAQPHRPTTNPNTSK|CGDSVYAAEK|CCFLCMVCR|GYGYGQGAGTLNMDRGER|GFGYGQGAGALVHAQ|PVWGGGNK|SLESTTLTEK		0.66321	0	16.2817	0
P35564	Canx	Mus musculus	Calnexin	7	7	0.018033	0.621352	887398	1118506	1.23448e+06	1.67781e+06	2152057	1.36751e+06	1.78146e+06	T	50	1	0.278316	-0.686518	67235.7	KIPNPDFFEDLEPFK|LPGDKGLVLMSR|VVDDWANDGWGLKK|GSLSGWILSK|TGVYEEK|HDGHDDDAIDIEDDLDDVIEEVEDSKSKSDASTPPSPK|GLVLMSR		0.16244	0	13.1991	0
Q9D1B9	Mrpl28	Mus musculus	Large ribosomal subunit protein bL28m	3	3	0.0180719	1.63684	471854	413738	520485	256531	231566	386764	287497	T	7	1	0.275542	0.710918	30151	VYVEELVQR|SLEEERTPTPVHYKPHGTK|PAVVQKR		0.13619	0.000503778	10.2254	4.14662e-05
Q9JMG1	Edf1	Mus musculus	Endothelial differentiation-related factor 1	11	11	0.0181174	0.493645	1.56478e+06	1.67626e+06	1.55936e+06	4.19595e+06	4.51779e+06	2488517	2335071	T	98	1	0.275381	-1.01845	16358.9	INEKPQVIADYESGR|AESDWDTVTVLR|SKQAILAAQR|LDRETEELHHDRVTLEVGK|AIPNNQVLGKIER|AIPNNQVLGK|QAILAAQR|ETEELHHDRVTLEVGK|DIGKPIEKGPK|NTAKLDRETEELHHDR|LDRETEELHHDR		0.56757	0	17.2944	0
P19783	Cox4i1	Mus musculus	Cytochrome c oxidase subunit 4 isoform 1, mitochondrial	4	4	0.0186252	0.685779	602855	626320	717911	770340	1.10507e+06	874238	1.06577e+06	T	18	1	0.278612	-0.544184	19517.8	ANPIQGFSAK|SEDYAFPTYADRR|DYPLPDVAHVTMLSASQK|ADWSSLSR		0.28994	0	11.19	0
P62320	Snrpd3	Mus musculus	Small nuclear ribonucleoprotein Sm D3	7	6	0.0187551	0.528552	1.62856e+06	1.82332e+06	1.95565e+06	4240560	4613860	2634911	2.59419e+06	T	68	1	0.277051	-0.919882	13907.3	VLHEAEGHIVTCETNTGEVYR|SIGVPIKVLHEAEGHIVTCETNTGEVYR|VAQLEQVYIR|IRFLILPDMLK|LIEAEDNMNCQMSNITVTYR|VLHEAEGHIVTCETNTGEVYRGK	FLILPDMLK	0.56349	0	21.2791	0
P61965	Wdr5	Mus musculus	WD repeat-containing protein 5	8	8	0.0191424	1.21997	1.89607e+06	2.01766e+06	1.97353e+06	1.72409e+06	1431508	1.75184e+06	1.5465e+06	T	35	1	0.27952	0.286844	36565.5	FSPNGEWLASSSADKLIK|AQPTPSSSATQSKPTPVKPNYALK|ATEEKKPETEAAR|YILAATLDNTLK|IWDTASGQCLK|TLPAHSDPVSAVHFNR|IWDVSSGK|IWGAYDGKFEK		0.33832	0	14.1181	0
Q99020	Hnrnpab	Mus musculus	Heterogeneous nuclear ribonucleoprotein A/B	11	11	0.0192063	1.53422	3.5807e+06	3.31134e+06	3428927	1.76951e+06	2.02824e+06	2848439	2.46816e+06	T	66	1	0.278733	0.617509	30812.3	IREYFGQFGEIEAIELPIDPK|IFVGGLNPEATEEK|EVYQQQQYGSGGR|GFVFITFKEEDPVKK|MFVGGLSWDTSKK|IFVGGLNPEATEEKIR|MFVGGLSWDTSK|SRGFGFILFK|GFGFILFK|EVYQQQQYGSGGRGNR|KFHTVSGSKCEIK		0.35789	0	16.3345	0
P22892	Ap1g1	Mus musculus	AP-1 complex subunit gamma-1	2	2	0.0193556	1.37143	271916	383005	370474	246466	237512	256012	245924	T	3	1	0.277608	0.455679	91292.1	YVALTSLLK|AVEYNALFK		0.0219	0.000503778	9.1881	4.14662e-05
Q9R1P4	Psma1	Mus musculus	Proteasome subunit alpha type-1	8	8	0.0194045	0.610919	918380	1.30581e+06	1.34179e+06	1.87826e+06	2.13582e+06	1.5123e+06	2.23131e+06	T	36	1	0.274913	-0.710948	29527.8	ALRETLPAEQDLTTK|IHQIEYAMEAVK|ETLPAEQDLTTK|AQPSQAAEEPAEKADEPMEH|FVFDRPLPVSR|NVSIGIVGK|LVSLIGSK|QGSATVGLK		0.31939	0	13.145	0
Q62446	Fkbp3	Mus musculus	Peptidyl-prolyl cis-trans isomerase FKBP3	11	11	0.0194687	0.643296	1.3385e+06	1.47168e+06	1.62176e+06	2.49721e+06	2939320	1.94675e+06	1.92266e+06	T	85	1	0.272769	-0.636445	25132.3	FLQDHGSDSFLAEHK|ARLEIEPEWAYGKK|GWDEALLTMSK|KGDVVHCWYTGTLPDGTVFDTNIQTSSK|TANKDHLVNAYNHLFESKR|AAAVPQR|TANKDHLVNAYNHLFESK|AWTVEQLR|FKGTETISK|LEIEPEWAYGKK|NAKPLSFK		0.53125	0	13.1388	0
Q64133	Maoa	Mus musculus	Amine oxidase [flavin-containing] A	2	2	0.0195062	0.837827	176268	208150	185791	213767	225287	223460	243745	T	9	1	0.270629	-0.255275	59563.7	INVLVLEAR|EVLNALGK		0.03232	0.000503778	9.14426	4.14662e-05
Q8VH51	Rbm39	Mus musculus	RNA-binding protein 39	28	25	0.0195498	0.500843	7.81337e+06	8653574	10552178	22750876	24363330	13252099	13793575	T	278	1	0.268491	-0.997571	59369.7	GIAYVEFVDVSSVPLAIGLTGQR|TDASSASSFLDSDELERTGIDLGTTGR|TDASSASSFLDSDELER|CPSIAAAIAAVNALHGR|ADDIDIEAMLEAPYKK|VLGVPIIVQASQAEKNR|VLGVPIIVQASQAEK|KALEQLNGFELAGRPMK|SKGYGFITFSDSECAKK|TGIDLGTTGR|IESIQLMMDSETGR|GYGFITFSDSECAKK|DLEEFFSTVGK|ADDIDIEAMLEAPYKKDENK|SKGYGFITFSDSECAK|AAAMANNLQK|GYGFITFSDSECAK|NSAQGNVYVK|IGLPHSIK|DKSPVREPIDNLTPEER|VGHVTERTDASSASSFLDSDELERTGIDLGTTGR|HGGVIHIYVDK|MITAAYVPLPTYHNLFPDSMT…	LYVGSLHFNITEDMLR|ALEQLNGFELAGRPMK|TVFCMQLAAR	0.56415	0	21.3791	0
P24788	Cdk11b	Mus musculus	Cyclin-dependent kinase 11B	7	6	0.0195951	0.6183	841352	952076	704996	1.3922e+06	1.7401e+06	1.06975e+06	1.23241e+06	T	24	1	0.267028	-0.693621	91457.5	TSNLLLSHAGILK|SVEEFQCLNR|APELLLGAK|YLPALQGCR|AQHPNIVTVR|TLDEILQEK	VGDFGLAR	0.08673	0	10.1682	0
B2RRE7	Otud4	Mus musculus	OTU domain-containing protein 4	6	6	0.0196511	1.32838	855232	658790	767444	534923	572931	647889	528828	T	18	1	0.265185	0.409672	122979	KADIDLASGSSAVEGK|VEGAHSLSAASVSSK|NVEYEIWLK|FFFNLGVK|SKQFYNQTYGSR|AVAEQVLHSQSR		0.06504	0	15.2669	0
Q0VG62	Rbis	Mus musculus	Ribosomal biogenesis factor	8	8	0.0196829	0.513592	1.71087e+06	1.5763e+06	1.98383e+06	4.3506e+06	4.61818e+06	2.67438e+06	2502820	T	92	1	0.263156	-0.961305	11156.1	HHENEPANVDEATR|KINIMNHEK|NVFHIASHK|AFVNIQKELANFSK|ELKHHENEPANVDEATR|AFVNIQK|INIMNHEK|ELANFSK		0.50515	0	17.4402	0
Q9JHJ0	Tmod3	Mus musculus	Tropomodulin-3	29	24	0.0197066	0.534224	32257652	43431432	29473360	82013072	78182928	46262404	59070760	T	449	1	0.261236	-0.904484	39478.3	DLGDYKDLDEDELLGKLSESELK|QLETVLDDLDPENALLPAGFR|DLGDYKDLDEDELLGK|ILPVFDEPPNPTNVEESLKR|FGYQFTQQGPR|LVEVNLNNIK|SLNMESNFITGAGVLALIDALR|QKPAQTLTEETISLDPELEEALTSASDTELCDLAAILGMHNLIADTPFCDVLGSSNGVNQER|HFSLAATR|NIPIPTLKDFAK|DRDDYVPYTGEKK|DRDDYVPYTGEK|QALEHKDRDDYVPYTGEK|TLEANTHVK|LSESELKQLETVLDDLDPENALLPAGFR|ILPVFDEPPNPTNVEESLK|SATGPFDRER|AANAITKNNDLVR|GKIFIPK|DNETLMELK|LLSYLEK|FPNVVKGEK|SATGPFDR|LSESELK	SLNMESNFITGAGVLALIDALRDNETLMELK|SNDPVAVAFADMLK|MLEENTNILK|QQLGTSVELEMAK|NIPIPTLK	0.87784	0	26.2394	0
P97855	G3bp1	Mus musculus	Ras GTPase-activating protein-binding protein 1	24	20	0.0198111	1.5937	14242175	10802561	11110940	6.97834e+06	6.28236e+06	9946727	7.26582e+06	T	261	1	0.259892	0.672384	51796.9	HPDSHQLFIGNLPHEVDKSELKDFFQNFGNVVELR|LPNFGFVVFDDSEPVQK|INSGGKLPNFGFVVFDDSEPVQK|FMQTFVLAPEGSVANKFYVHNDIFR|FMQTFVLAPEGSVANK|NSSYAHGGLDSNGKPADAVYGQK|IRHVDAHATLNDGVVVQVMGLLSNNNQALRR|HVDAHATLNDGVVVQVMGLLSNNNQALRR|NLPPSGAVPVTGTPPHVVK|IRHVDAHATLNDGVVVQVMGLLSNNNQALR|FYVHNDIFR|EAGEPGDVEPR|GPRPIREAGEPGDVEPR|TFSWASVTSK|LRGPGGPRGGPSGGMR|VLSNRPIMFR|RFMQTFVLAPEGSVANK|GPGGPRGGPSGGMR|INIPPQR|KVMSQNFTNCHTK	STSPAPADVAPAQEDLR|QYYTLLNQAPDMLHR|VMEKPSPLLVGR|VMSQNFTNCHTK	0.5871	0	26.3681	0
Q62191	Trim21	Mus musculus	E3 ubiquitin-protein ligase TRIM21	19	19	0.0198169	0.44789	3692269	5713396	3.50018e+06	13058008	11847468	6.46883e+06	7.69174e+06	T	137	1	0.257571	-1.15878	54139.9	LHLFCEEDGQALCWVCAQSGK|EAELAEKNQALQELISELER|HIANMVENLK|SGSWNLDTLDIDAPDLTSTCPVPGR|IRGSELELLQEVR|GSELELLQEVR|FSNYPMVLGAQR|IHAEFALQNSLLAQEEQR|EAELAEKNQALQELISELERR|NQALQELISELERR|DHTRVPIEEAAK|NTANSWLIISK|TCWVHITLDR|MYWEVDVTQK|HRDHTRVPIEEAAK|EAWDLGVCR|VPIEEAAK|ECIFEVGK|MEMDLTMQR		0.40638	0	21.3977	0
Q8R418	Dicer1	Mus musculus	Endoribonuclease Dicer	2	2	0.0200604	1.38443	240669	194544	197943	146320	130389	155071	179121	T	3	1	0.259044	0.469291	216683	VTINTAIGHINR|ETPFVFKLEDYQDAVIIPR		0.01618	0.000503778	10.1813	4.14662e-05
Q569Z5	Ddx46	Mus musculus	Probable ATP-dependent RNA helicase DDX46	64	58	0.0202516	0.452053	17604894	19044950	15379650	53896104	53145160	28437240	26190598	T	691	1	0.257404	-1.14543	117376	SLEEGEGPIAVIMTPTR|NLGIESQVDVMQQATNAILR|VVCVYGGTGISEQIAELKR|VKDMAAPGTSSVPAPTAGNAEKLEIAK|SVVCSDVEQQVIVIEEEKK|HLILVVNYSCPNHYEDYVHR|GFKFDETEQALANER|RYEEELEINDFPQTAR|VTYVVLDEADRMFDMGFEPQVMR|AGNKGYAYTFITEDQAR|RILSKPIEVQVGGR|GYAYTFITEDQAR|MSQEEVNVFR|ILSKPIEVQVGGR|ALELSGTAVPPDLEKLWSDFKDQQK|LLVATSVAAR|GAEIIVCTPGR|ISEYSEAAITIR|GFKFDETEQALANERK|VTYVVLDEADR|LQNSYQPTNK|RGAEIIVCTPGR|LLELLGHYQESGSVIIFVDKQEHADGL…	MSQEEVNVFRLEMEGITVK|MIDMLAANSGR|RVTYVVLDEADRMFDMGFEPQVMR|QTVMFSATFPR|AMENIGELKK|TIAFLLPMFR	0.56105	0	20.4156	0
Q78WZ7	Polr1f	Mus musculus	DNA-directed RNA polymerase I subunit RPA43	4	4	0.0203266	0.507983	347580	336942	398656	1.06709e+06	809389	521140	560916	T	10	1	0.256104	-0.977147	36698.4	SQAASERPVAGQAGVLPCLELPSYAAACALVGSR|EQLDAELLR|HIALSPR|LSTTSLQLK		0.17879	0	11.2391	0
P25444	Rps2	Mus musculus	Small ribosomal subunit protein uS5	28	27	0.0206392	1.47139	12263462	17989988	13524265	10367392	8624084	11006943	9312246	T	282	1	0.257552	0.557176	31211.7	SLEEIYLFSLPIKESEIIDFFLGASLKDEVLK|ESEIIDFFLGASLKDEVLK|FKAFVAIGDYNGHVGLGVK|LLMMAGIDDCYTSAR|SLEEIYLFSLPIK|SPYQEFTDHLVK|AEDKEWIPVTK|AFVAIGDYNGHVGLGVK|TYSYLTPDLWKETVFTK|GTGIVSAPVPK|TYSYLTPDLWK|GCTATLGNFAK|IGKPHTVPCKVTGR|CSKEVATAIR|IGKPHTVPCK|ETVFTKSPYQEFTDHLVK|CGSVLVR|ATFDAISK|LSIVPVRR|TQAPAVATT|GYWGNKIGKPHTVPCK|LSIVPVR|EVATAIR|GTGIVSAPVPKK|ATFDAISKTYSYLTPDLWK|RGYWGNK|TYSYLTPDLWKETVFTKSPYQEFTDHLVK	KLLMMAGIDDCYTSAR	0.65188	0	23.247	0
Q1HFZ0	Nsun2	Mus musculus	RNA cytosine C(5)-methyltransferase NSUN2	30	30	0.0206824	1.23874	6.61245e+06	6.49541e+06	5.82305e+06	4952577	4.54324e+06	5.65702e+06	5257623	T	152	1	0.256068	0.308871	85397.2	KLSSEAYSQVKDLAK|SEGALELADVSAELPGLK|FQQPPQPEGEEDASDGGR|LSSPCIMVVNHDASSIPR|LFGFKEDPFVFIPEDDPLFPPIEK|KLSSEAYSQVK|DGQWFADWHEVPQGR|GAEQLAEGGR|ILDMCAAPGSK|IITVSMEDVK|TLLTQENPFFR|RFQQPPQPEGEEDASDGGR|LAQEGIYTLYPFINSR|QEAVSMIPPLLLNVEPHHK|MMGLEVLGEK|NNSGEEFDCAFR|NVLLNNSEK|FYALDPSFPR|WMPGVSQWK|LFEHYYQELK|ILPHHQNTGGFFVAVLVK|ILCDVPCSGDGTMRK|EILHCLK|TFVPKNER|LTVDVDGRK|LSSEAYSQVK|WTTLNSLQLHGLQLR|LSSEAYSQVKDLAK|…		0.44122	0	20.2992	0
P62843	Rps15	Mus musculus	Small ribosomal subunit protein uS19	8	4	0.0207771	1.43988	6196068	5.64659e+06	7.90729e+06	4495357	4.0422e+06	5339045	4322659	T	119	1	0.255458	0.525953	17029.2	THLRDMIILPEMVGSMVGVYNGK|KEAPPMEKPEVVK|HGRPGIGATHSSR|EAPPMEKPEVVKTHLR	GVDLDQLLDMSYEQLMQLYSAR|TFNQVEIKPEMIGHYLGEFSITYKPVK|DMIILPEMVGSMVGVYNGK|EAPPMEKPEVVK	0.67586	0	22.3665	0
Q9D883	U2af1	Mus musculus	Splicing factor U2AF 35 kDa subunit	13	8	0.020929	0.528381	3.17448e+06	2.97309e+06	3558840	6.95129e+06	8925257	5.05807e+06	4.43054e+06	T	136	1	0.256101	-0.920348	27797.4	WFNGQPIHAELSPVTDFR|NPQNSSQSADGLR|LHNKPTFSQTIALLNIYR|LHNKPTFSQTIALLNIYRNPQNSSQSADGLR|REEDAEKAVIDLNNR|AVIDLNNR|EEDAEKAVIDLNNR|FRREEDAEK	GGFCNFMHLKPISR|AEYLASIFGTEK|QYEMGECTR|DKVNCSFYFK|VNCSFYFK	0.46444	0	18.2388	0
Q8R1F0	D8Ertd738e	Mus musculus	Leydig cell tumor 10 kDa protein homolog	5	5	0.0211606	0.555134	712612	744975	949312	1.64747e+06	1.96446e+06	1.16807e+06	1.11708e+06	T	24	1	0.2565	-0.849092	10190.9	KSEATIPGKTPS|SLEVGIRK|SLEVGIR|KSLEVGIR|SEATIPGKTPS		0.2234	0	10.4559	0
P56959	Fus	Mus musculus	RNA-binding protein FUS	19	15	0.021266	0.531503	7.98634e+06	8282485	7.30048e+06	18164092	20611246	11727163	10813006	T	283	1	0.255901	-0.91185	52641.5	DQGSRHDSEQDNSDNNTIFVQGLGENVTIESVADYFK|AAIDWFDGKEFSGNPIK|LKGEATVSFDDPPSAK|AAIDWFDGKEFSGNPIKVSFATR|CPNPTCENMNFSWR|GEATVSFDDPPSAK|AGDWKCPNPTCENMNFSWR|TGQPMINLYTDR|KTGQPMINLYTDR|NECNQCKAPKPDGPGGGPGGSHMGGNYGDDR|GGRGRGGGGGYNR|TGQPMINLYTDRETGKLK|EFSGNPIK|VSFATRR|AAIDWFDGK	KTGQPMINLYTDRETGK|APKPDGPGGGPGGSHMGGNYGDDR|TGQPMINLYTDRETGK|APKPDGPGGGPGGSHMGGNYGDDRR	0.30502	0	26.2862	0
P17225	Ptbp1	Mus musculus	Polypyrimidine tract-binding protein 1	21	17	0.0214742	1.45536	7.06198e+06	7.83286e+06	7.7982e+06	4566779	4423835	6.63309e+06	5421398	T	186	1	0.256852	0.54138	59284.6	KMALIQMGSVEEAVQALIELHNHDLGENHHLR|KLPSDVTEGEVISLGLPFGK|IAIPGLAGAGNSVLLVSNLNPER|ENALVQMADGSQAQLAMSHLNGHK|VTPQSLFILFGVYGDVQR|NNQFQALLQYADPVSAQHAK|LSLDGQNIYNACCTLR|NFQNIFPPSATLHLSNIPPSVSEDDLK|EGQEDQGLTKDYGSSPLHR|MDGIVPDIAVGTK|GQPIYIQFSNHKELK|HQSVQLPR|GQPIYIQFSNHK|HQSVQLPREGQEDQGLTKDYGSSPLHR|ENALVQMADGSQAQLAMSHLNGHKLHGK|DYGSSPLHR|SLFSSNGGVVK	MDGIVPDIAVGTKR|IDFSKLTSLNVK|EGQEDQGLTK|LTSLNVK	0.47387	0	22.2074	0
Q9DCL9	Paics	Mus musculus	Bifunctional phosphoribosylaminoimidazole carboxylase/phosphoribosylaminoimidazole succinocarboxamide synthetase	17	17	0.0215075	0.931635	3829455	4.13102e+06	3.9521e+06	4291619	4229938	4353319	4168091	T	118	1	0.254959	-0.102163	46976.1	ATAVVVNIGKK|EIVLADVIDNDSWR|IKAEYEGDGIPTVFVSVAGR|ACGNFGIPCELR|VLLQSKDQITAGNAAR|VVVLMGSTSDLGHCEK|EVYELLDTPGR|TKEVYELLDTPGR|DQITAGNAAR|ASILNTWISLK|EVTPEGLQMVK|DLKEVTPEGLQMVK|NPGVQEGYK|RIATGSFLKR|VTSAHKGPDETLR|IATGSFLK|KNFEWVADRVELLLK		0.40941	0	17.4178	0
P83882	Rpl36a	Mus musculus	Large ribosomal subunit protein eL42	14	14	0.0215744	1.32308	4.4074e+06	3.32657e+06	3.83669e+06	2.80345e+06	2.6243e+06	3.21268e+06	2.97575e+06	T	83	1	0.254129	0.4039	12432.8	IVLRLECVEPNCR|KIVLRLECVEPNCR|HFELGGDK|GKDSLYAQGK|LECVEPNCR|CKHFELGGDK|GKDSLYAQGKR|HFELGGDKKR|DSLYAQGK|KGQVIQF|QSGYGGQTKPIFR|KGKDSLYAQGK|DSLYAQGKR|RKGQVIQF		0.54717	0	17.3343	0
Q9ESZ8	Gtf2i	Mus musculus	General transcription factor II-I	23	22	0.0217011	0.567695	4.06568e+06	4.02163e+06	4.14068e+06	8401516	9985808	5.49773e+06	5.76002e+06	T	144	1	0.253472	-0.816811	112195	RPELLTHSTTEVTQPR|TPTQTNGSNVPFKPR|SMLSPSGSCGPIK|FAEALGSTEAK|TNTPVKEDWNVR|ILDSAEFIK|FEAHPNDLYVEGLPENIPFR|YCVEEEEKAAEMHK|SPTWFGIPR|KQVEEIFNLK|CGEALGLK|AGISFIIK|VLAAEAER|SPSWYGIPR|STVVPVPYEK|GREFSFEAWNAK|RILDSAEFIK|IIQVGNR|KPELVVSYLPPGMASK|DFQKDFVK|KDFQKDFVK|KMVDQLFCKK	EQVNDLFSR	0.23647	0	15.2875	0
Q9D1J3	Sarnp	Mus musculus	SAP domain-containing ribonucleoprotein	12	12	0.0217348	0.556409	2595819	2.4403e+06	2.90923e+06	5752589	6.45654e+06	3.72604e+06	3669805	T	67	1	0.252286	-0.845783	23518.3	AAETVELHK|FGLNVSSISR|ITSGIPQTER|FNVPVSLESKK|FNVPVSLESK|FGISSVPTK|FGIVTSSAGTGTTEDTEAK|GLSSDTKPMVNLDK|LAELKQECLAR|FGIVTSSAGTGTTEDTEAKKR|GIKQDLINR|AAETVELHKLK		0.50476	0	14.1637	0
P09405	Ncl	Mus musculus	Nucleolin	39	37	0.022112	1.23189	17437304	18877396	15820698	12561889	14101356	14970103	14780816	T	378	1	0.254457	0.300876	76676.8	NLSFNITEDELKEVFEDAMEIR|TLVLSNLSYSATKETLEEVFEK|SEADAEKNLEEKQGAEIDGR|KQKVEGSEPTTPFNLFIGNLNPNK|FAISELFAKNDLAVVDVR|SEADAEKNLEEK|GLSEDTTEETLKESFEGSVR|GIAYIEFKSEADAEKNLEEK|GFGFVDFNSEEDAK|TLVLSNLSYSATK|GYAFIEFASFEDAKEALNSCNKMEIEGR|KFGYVDFESAEDLEK|GYAFIEFASFEDAKEALNSCNK|FGYVDFESAEDLEK|ATFIKVPQNPHGKPK|QKVEGSEPTTPFNLFIGNLNPNK|SVNELKFAISELFAKNDLAVVDVR|ALELTGLKVFGNEIK|TIRLELQGSNSR|NDLAVVDVR|SVSLYYTGEK|LELQGS…	EAMEDGEIDGNKVTLDWAKPK|THGEAKKMAPPPK	0.46676	0	22.2915	0
Q5NCR9	Nsrp1	Mus musculus	Nuclear speckle splicing regulatory protein 1	7	7	0.0222193	0.432775	676202	655555	722076	2262122	2.3292e+06	1.10557e+06	1.07152e+06	T	31	1	0.253188	-1.20831	63760.7	LRGYPDETNSESRPPQQSCVLQR|HLLNQAVGEEAAPK|RSNEETVMSAR|SNEETVMSAR|AAALEAHLDVTK|QYGLILPK|TYIEKEDD		0.14022	0	15.3116	0
Q9CYI4	Luc7l	Mus musculus	Putative RNA-binding protein Luc7-like 1	29	19	0.0222519	0.441079	9147322	9911206	10947963	27664068	36870348	16728467	15330523	T	396	1	0.251597	-1.18089	43907.4	ERDLFFELDAMDHLESFIAECDRR|AEKVHELNEEIGKLLAK|SHLLDCCPHDILAGTR|AEQLGAEGNVDESQKILMEVEKVR|AEQLGAEGNVDESQK|LAETQEEISAEVSAK|DLFFELDAMDHLESFIAECDRR|AEKVHELNEEIGK|IHDLALRADYEIASK|LHLGFIQIR|ILMEVEKVR|SLREESWEYGRNER|VKFTDDRVCK|ADYEIASKER|EKLDQLR|FTDDRVCK|LAETQEEISAEVSAKAEK|VKFTDDR|ILMEVEK	VHELNEEIGKLLAK|VHELNEEIGK|EAEEEYRNSMPASSFQQQK|ALLDQLMGTAR|LRVCEVCSAYLGLHDNDRR|VCEVCSAYLGLHDNDR|VCEVCSAYLGLHDNDRR|NSMPASSFQQQK|ADYEIASK|MDLGECTK	0.56065	0	24.2812	0
P35550	Fbl	Mus musculus	rRNA 2'-O-methyltransferase fibrillarin	15	11	0.0222756	0.5758	4004237	4.40069e+06	4.12578e+06	9028938	9465165	5878430	5.49475e+06	T	176	1	0.250277	-0.796359	34285.7	RVSISEGDDKIEYR|VLYLGAASGTTVSHVSDIVGPDGLVYAVEFSHR|LAAAILGGVDQIHIKPGAK|VSISEGDDKIEYR|NLVPGESVYGEKR|ANCIDSTASAEAVFASEVKK|SKLAAAILGGVDQIHIKPGAK|TNIIPVIEDARHPHK|GKEDALVTK|TNIIPVIEDARHPHKYR|NLVPGESVYGEK	DHAVVVGVYRPPPK|NVMVEPHRHEGVFICR|MLIAMVDVIFADVAQPDQTR|IVALNAHTFLR	0.57187	0	20.2632	0
P57759	Erp29	Mus musculus	Endoplasmic reticulum resident protein 29	1	1	0.0223918	0.684954	73081.1	81895.1	66805.6	86852.5	103994	110989	133491	T	6	1	0.249466	-0.545921	28805.1	SLNILTAFR		0.03435	0.000503778	9.13973	4.14662e-05
Q6DTY7	Pfkfb4	Mus musculus	6-phosphofructo-2-kinase/fructose-2,6-bisphosphatase 4	1	1	0.0230511	0.471745	1067277	903594	1.52834e+06	3.65066e+06	2.30887e+06	1.65038e+06	2.4347e+06	T	10	1	0.255424	-1.08392	54032.3	SFEFFLPDNEEGLK		0.02985	0.000997009	9.08537	6.65894e-05
A2RTL5	Rsrc2	Mus musculus	Arginine/serine-rich coiled-coil protein 2	5	4	0.0231184	0.437592	890178	849298	1.00747e+06	2.95829e+06	3.06422e+06	1.36591e+06	1.53215e+06	T	43	1	0.254015	-1.19234	43849.9	GMGLGFTSSMR|LNFGNKDQNVK|TLKQQEEVFR|QQEEVFR	NTAMDAQEALAR	0.11702	0	13.3359	0
Q7TPR4	Actn1	Mus musculus	Alpha-actinin-1	24	14	0.0232775	0.734004	2027541	1541393	1.98644e+06	2.34626e+06	2.88088e+06	2.29007e+06	2.53941e+06	T	111	1	0.252776	-0.44614	103004	LAILGIHNEVSK|IDQLECDHQLIQEALIFDNK|GISQEQMNEFR|LLETIDQLYLEYAKR|HRPELIDYGK|HTNYNMEHIR|QKDYETATLSEIK|KHEAFESDLAAHQDRVEQIAAIAQELNELDYYDSPSVNAR|ISIEMHGTLEDQLSHLR|MLDAEDIVGTARPDEK|RDQALTEEHAR|AGTQIENIEEDFRDGLK|LRKDDPLTNLNTAFDVAER|ATLPDADKER	TINEVENQILTR|AIMTYVSSFYHAFSGAQK|LASDLLEWIR|KTFTAWCNSHLR|LSNRPAFMPSEGR|ALDFIASK|CQLEINFNTLQTK|VGWEQLLTTIAR|KHEAFESDLAAHQDR|LASDLLEWIRR	0.35874	0	14.2703	0
Q5RJG1	Nol10	Mus musculus	Nucleolar protein 10	1	1	0.0232864	1.48069	74784.7	61845.6	65108.5	52731.6	48873.9	47431.8	34350.7	T	3	1	0.251378	0.566272	80027.2	HGTLNVSDTTVGSK		0.02038	0	12.0736	0
P53996	Cnbp	Mus musculus	CCHC-type zinc finger nucleic acid binding protein	9	9	0.023375	0.473294	1.68364e+06	2.0097e+06	1.39782e+06	3587121	5903165	2.70013e+06	2767175	T	76	1	0.251676	-1.07919	19578.6	GFQFVSSSLPDICYR|CGETGHVAINCSK|DCDHADEQKCYSCGEFGHIQK|EQCCYNCGKPGHLAR|TSEVNCYR|CYSCGEFGHIQK|SSNECFK|CYSCGEFGHIQKDCTK|DCDHADEQKCYSCGEFGHIQKDCTK		0.46629	0	15.4117	0
O70333	Cript	Mus musculus	Cysteine-rich PDZ-binding protein	5	5	0.0234272	0.578392	471998	466046	515574	969697	1.15915e+06	640953	680859	T	51	1	0.250803	-0.789881	11263.6	SSVHQPGSHYCQGCAYKK|SSVHQPGSHYCQGCAYK|VITPDTWK|GICAMCGK|VITPDTWKDGAR		0.37624	0	10.2039	0
Q9D8B3	Chmp4b	Mus musculus	Charged multivesicular body protein 4b	2	2	0.0236378	0.766155	193087	184096	145076	247731	221050	217255	217346	T	9	1	0.251304	-0.384291	24920.6	GGPTPQEAIQR|LRDTEEMLSK		0.09375	0.00827586	10.1152	0.000715741
Q99LY9	Ndufs5	Mus musculus	NADH dehydrogenase [ubiquinone] iron-sulfur protein 5	6	6	0.0237722	0.493891	425719	477490	559572	1.22136e+06	1.40301e+06	644986	838067	T	10	1	0.250763	-1.01774	12639.3	IEFDDFEECLLR|PFLDIQK|EWIECAHGIGGTR|YTPPPHHSGREEPRP|LGISLDR|ECKIEFDDFEECLLR		0.53774	0	11.1416	0
P17182	Eno1	Mus musculus	Alpha-enolase	35	28	0.0237968	0.66323	13458110	17918278	18809734	24618016	28782840	20101494	27244558	T	381	1	0.248971	-0.592419	47111.2	HIADLAGNPEVILPVPAFNVINGGSHAGNK|YGKDATNVGDEGGFAPNILENKEALELLK|DATNVGDEGGFAPNILENKEALELLK|AAVPSGASTGIYEALELRDNDKTR|YGKDATNVGDEGGFAPNILENK|FTASAGIQVVGDDLTVTNPKR|FTASAGIQVVGDDLTVTNPK|DATNVGDEGGFAPNILENK|YNQILRIEEELGSK|GVSQAVEHINK|KVNVVEQEKIDK|LMIEMDGTENK|IGAEVYHNLKNVIKEK|IGAEVYHNLK|YITPDQLADLYK|IDKLMIEMDGTENK|SCNCLLLK|EIFDSRGNPTVEVDLYTAK|SPDDPSRYITPDQLADLYK|VNVVEQEKIDKLMIEMDGTENK|TIAPALVSK|VNVVEQEKID…	SGETEDTFIADLVVGLCTGQIK|LAMQEFMILPVGASSFR|AAVPSGASTGIYEALELR|LAQSNGWGVMVSHR|SGKYDLDFKSPDDPSR|FGANAILGVSLAVCK|GNPTVEVDLYTAK	0.75576	0	27.2927	0
O35680	Mrps12	Mus musculus	Small ribosomal subunit protein uS12m	3	3	0.0238937	0.696571	726435	534214	597323	879086	1.05862e+06	869072	747838	T	16	1	0.247773	-0.521657	15427.4	EAVCFIPGEGHTLQEHHVVLVEGGR|TQDLPGVK|LGPTEGRPQLK		0.31655	0	12.1139	0
P62911	Rpl32	Mus musculus	Large ribosomal subunit protein eL32	15	11	0.0239711	1.49901	4.60538e+06	4730268	4.03709e+06	3.48243e+06	2.20653e+06	3204004	3.14624e+06	T	163	1	0.246507	0.584008	15849.8	SYCAEIAHNVSSK|GQILMPNIGYGSNKK|FKGQILMPNIGYGSNK|TKHMLPSGFRK|HMLPSGFR|FLVHNVK|TKHMLPSGFR|GQILMPNIGYGSNK|HMLPSGFRK|VTNPNAR|LRSEENE	FLVHNVKELEVLLMCNK|FKGQILMPNIGYGSNKK|ELEVLLMCNK|AALRPLVKPK	0.60741	0	21.3287	0
P34022	Ranbp1	Mus musculus	Ran-specific GTPase-activating protein	6	6	0.024047	0.754771	1.99332e+06	1.55135e+06	1913738	2.43994e+06	2583603	2.07063e+06	2.52692e+06	T	41	1	0.246657	-0.405889	23581.7	AWVWNTHADFADECPKPELLAIR|TLEEDEEELFK|FASENDLPEWKER|VAEKLEALSVR|FLNAENAQK|FASENDLPEWK		0.33005	0	14.142	0
O70378	Emc8	Mus musculus	ER membrane protein complex subunit 8	9	9	0.0241093	1.35967	2.30401e+06	1625444	1.86111e+06	1.47024e+06	1.25516e+06	1.47167e+06	1.43439e+06	T	33	1	0.245722	0.44326	23333.4	SYETLVDFDNHLDDIR|IAEGFGDAALIMVDNAK|ISASLLDSR|SYETLVDFDNHLDDIRSDWTNPEINK|SDWTNPEINK|LTTQAYCK|CRDPHHDYCEDWPEAQR|YPHCAVNGLLVAER|FTMDCAAPTIHVYEQHENRWR		0.54106	0	15.2	0
Q80X50	Ubap2l	Mus musculus	Ubiquitin-associated protein 2-like	13	13	0.0241263	0.659489	1.55364e+06	1.61326e+06	1.67577e+06	2.71255e+06	3149503	2.15161e+06	1.94899e+06	T	53	1	0.244028	-0.60058	116728	AINVLLEGNPDTHSWEMVGK|IDLAVLLGK|QRPQATAEQIR|IFTASNVSSVPLPAENVTITAGQR|LAQMISDHNDADFEEKVK|GNWEQPQNQNQTQHK|KFETAPGAWR|QLIDITGK|EFRGQENGLDGTK|GFGDVGEAK|SQTSSIPQKPQTNK|NQDECVIALHDCNGDVNR|LAQMISDHNDADFEEK		0.15266	0	17.2731	0
P62702	Rps4x	Mus musculus	Small ribosomal subunit protein eS4	38	35	0.0242174	1.20649	31550834	30757876	35800188	26692646	25108170	29964640	26641104	T	449	1	0.242822	0.270822	29579.1	VNDTIQIDLETGKITDFIKFDTGNLCMVTGGANLGR|ERHPGSFDVVHVKDANGNSFATR|VRTDITYPAGFMDVISIDKTGENFR|VNDTIQIDLETGKITDFIK|FDTGNLCMVTGGANLGR|HPGSFDVVHVKDANGNSFATR|HWMLDKLTGVFAPRPSTGPHK|ITDFIKFDTGNLCMVTGGANLGR|VRTDITYPAGFMDVISIDK|VNDTIQIDLETGK|TDITYPAGFMDVISIDK|HPGSFDVVHVK|ERHPGSFDVVHVK|LSNIFVIGKGNKPWISLPR|LRECLPLIIFLR|GIPHLVTHDAR|TIRYPDPLIK|LKYALTGDEVKK|LSNIFVIGK|YALTGDEVK|DANGNSFATR|YALTGDEVKK|ECLPLIIFLR|LKYALT…	TDITYPAGFMDVISIDKTGENFR|HWMLDKLTGVFAPR|GNKPWISLPR	0.80608	0	24.3773	0
P36993	Ppm1b	Mus musculus	Protein phosphatase 1B	32	27	0.0242271	0.479295	18501588	21630644	20172816	60780180	55927144	29926158	30168078	T	597	1	0.24117	-1.06102	42767.6	SRLEVSDDLENVCNWVVDTCLHK|CVDGKGPTEQLVSPEPEVYEIVR|DSELDKHLESRVEEIMQK|VANYCSTHLLEHITTNEDFR|LEVSDDLENVCNWVVDTCLHK|GPTEQLVSPEPEVYEIVR|DNMSVVLVCFSNAPK|AADKSGSALEPSVESVK|ILSAENIPNLPPGGGLAGKR|SGSTAVGVMVSPTHMYFINCGDSR|NGQVCFSTQDHKPCNPVEK|SGSALEPSVESVK|HVIEAVYSR|GSRDNMSVVLVCFSNAPK|RHVIEAVYSR|TGFLKIDEYMR|NGQVCFSTQDHKPCNPVEKER|DSELDKHLESR|VANYCSTHLLEHITTNEDFRAADKSGSALEPSVESVK|ALGDYDYK|LNPHKDNDGGAGDLEDSLVAL|I…	VEMEDAHTAVVGIPHGLDNWSFFAVYDGHAGSR|SGEEGMPDLAHVMR|IQNAGGSVMIQR|YGLSSMQGWR|VNGSLAVSR	0.84615	0	22.384	0
P06330		Mus musculus	Ig heavy chain V region AC38 205.12	2	2	0.0246158	0.329145	3047563	1.51462e+06	3281933	15003251	6936941	5094294	6023661	T	20	1	0.244	-1.6032	12926.2	SLTSEDSAVYYCAR|SSSATYMELRSLTSEDSAVYYCAR		0.20339	0	15.453	0
Q9JIG8	Praf2	Mus musculus	PRA1 family protein 2	1	1	0.0247861	0.536692	40259.9	49212.7	51044.1	74518	112715	59931.9	112822	T	2	1	0.245128	-0.897835	19465.7	ALDDFVLGSAR		0.0618	0.00567644	8.07202	0.000536279
O88455	Dhcr7	Mus musculus	7-dehydrocholesterol reductase	1	1	0.0248653	1.30625	189955	235957	211094	152592	143256	183569	171289	T	6	1	0.245067	0.385434	53883.3	YTAAVPYR		0.01699	0.00196464	8.23721	7.70852e-05
Q8BGS2	Bola2	Mus musculus	BolA-like protein 2	7	7	0.0248799	0.423205	2138138	2322537	2.95291e+06	7478296	9208476	3.54959e+06	4577454	T	104	1	0.243629	-1.24057	10208.2	HRLVNECLAEELPHIHAFEQK|LRQDLEAEHVEVEDTTLNR|EKLRQDLEAEHVEVEDTTLNR|MELSADYLR|LVNECLAEELPHIHAFEQK|TLTPEQWTR|FEGKPLLQR		0.80233	0	19.1213	0
Q9DBU6	Rsrc1	Mus musculus	Serine/Arginine-related protein 53	7	7	0.0250899	0.433388	1.13212e+06	1.59246e+06	1.26984e+06	4364787	4335462	1892385	2388336	T	32	1	0.245947	-1.20627	38614.4	VKEIEAIESDSFVQQTFR|YQDDNSLAHPNLFIEK|LQLVLEAAAK|AEAEEKWFKR|AGLEHLPPAEQAK|LMGSPVA|KAVEPSEVQHVTAASGPASAAAEPPSTGKEIDPDSIPTAIK		0.34431	0	16.3637	0
O88569	Hnrnpa2b1	Mus musculus	Heterogeneous nuclear ribonucleoproteins A2/B1	13	13	0.0251171	1.38171	3776418	3744461	2.75809e+06	2.40668e+06	2.6026e+06	2667314	2172037	T	86	1	0.24434	0.466458	37379.7	NMGGPYGGGNYGPGGSGGSGGYGGR|GGGGNFGPGPGSNFR|GFGFVTFSSMAEVDAAMAARPHSIDGR|GFGFVTFDDHDPVDKIVLQK|QEMQEVQSSR|YHTINGHNAEVR|ALSRQEMQEVQSSR|GGNFGFGDSR|LTDCVVMRDPASKR|YHTINGHNAEVRK|NYYEQWGK|SGRGGNFGFGDSR|KLFIGGLSFETTEESLRNYYEQWGK		0.47025	0	18.2797	0
Q9WTM5	Ruvbl2	Mus musculus	RuvB-like 2	9	9	0.0255064	0.844565	1.07302e+06	1.19842e+06	1.31144e+06	1.40878e+06	1.48371e+06	1.35068e+06	1.39749e+06	T	34	1	0.247818	-0.243719	51080.5	TQGFLALFSGDTGEIKSEVR|AVLIAGQPGTGK|LLIVSTSPYSEKDTK|KGTEVQVDDIKR|VYSLFLDESR|TTEMETIYDLGTK|QASQGMVGQLAAR|GLGLDDALEPR|FVQCPDGELQK		0.2527	0	14.0877	0
P11031	Sub1	Mus musculus	Activated RNA polymerase II transcriptional coactivator p15	9	5	0.0256202	0.449237	4450038	6619229	3.54782e+06	14476127	13786155	7823856	7.74032e+06	T	140	1	0.246297	-1.15445	14418.4	KGISLNMEQWSQLKEQISDIDDAVR|EYWMDSEGEMKPGR|EQISDIDDAVR|KGISLNMEQWSQLK|DDNMFQIGK	GISLNMEQWSQLKEQISDIDDAVR|GISLNMEQWSQLK|EYWMDSEGEMKPGRK|QSSSSRDDNMFQIGK	0.4252	0	27.3914	0
P97315	Csrp1	Mus musculus	Cysteine and glycine-rich protein 1	6	6	0.0256508	0.454302	1477773	1.0699e+06	1.70194e+06	3.46311e+06	4.91592e+06	2114586	2.44075e+06	T	26	1	0.244923	-1.13828	20569.8	GLESTTLADKDGEIYCK|NLDSTTVAVHGEEIYCK|CSQAVYAAEK|TVYFAEEVQCEGNSFHK|GFGFGQGAGALVHSE|SCFLCMVCKK		0.4456	0	15.2383	0
Q99L45	Eif2s2	Mus musculus	Eukaryotic translation initiation factor 2 subunit 2	17	17	0.0256969	0.864199	5.02357e+06	5.32103e+06	5.71013e+06	6228320	6574931	6254461	5.70994e+06	T	155	1	0.244459	-0.210564	38068.2	KIFDIDEAEEAIKDVK|KKDASDDLDDLNFFNQK|IFDIDEAEEAIKDVK|TSFVNFTDICK|LYFLQCETCHSR|TGFQAVTGK|IESDAQEPAEPEDDLDIMLGNK|DYTYEELLNR|TGFQAVTGKR|EKNPDMVAGEK|KTSFVNFTDICK|RYIKEYVTCHTCR|SPDTILQK|SPDTILQKDTR|YIKEYVTCHTCR|CSVASIK|FVMKPPQVVR		0.45619	0	22.3617	0
Q99KP6	Prpf19	Mus musculus	Pre-mRNA-processing factor 19	18	18	0.0257074	1.28756	5187295	5487328	6.22766e+06	4.53608e+06	3810874	4971733	4.21586e+06	T	117	1	0.243215	0.364639	55204.4	SLICSISNEVPEHPCVSPVSNHVYER|ILTGGADKNVVVFDKSTEQILATLK|KVTSVVFHPSQELVFSASPDATIR|YIAENGTDPINNQPLSEEQLIDIK|ALQDEWDAVMLHSFTLR|QVASHVGLHSASIPGILALDLCPSDTNK|GKTVPEELVKPEELSK|LQDKATVLTTER|VAHPIRPKPPSATSIPAILK|VTSVVFHPSQELVFSASPDATIR|IWSVPNTSCVQVVR|QELSHALYQHDAACR|TVPEELVKPEELSK|TLQLDNNFEVK|ILTGGADKNVVVFDK|FIASTGMDR|STEQILATLK|ATVLTTER		0.47817	0	20.2415	0
A2AKX3	Setx	Mus musculus	Probable helicase senataxin	4	4	0.026199	0.601055	246960	153778	213267	351807	417356	322468	263212	T	6	1	0.245434	-0.734432	297401	LLTSQDLQFQR|SLECIVQLR|ENDLVFLAPEK|FSLDSQVNHR		0.0155	0	10.0542	0
P01029	C4b	Mus musculus	Complement C4-B	5	5	0.0262103	0.527096	430144	534410	378064	1.16181e+06	1.04533e+06	643547	638083	T	24	1	0.2439	-0.923862	192794	ASAGLLGAHAAAITAYALTLTK|VTASEPLETMGSEGALSPGGVASLLR|DHAVDLIQK|LSPETKDHAVDLIQK|ANSFLGQK		0.04085	0	19.3449	0
Q91WK2	Eif3h	Mus musculus	Eukaryotic translation initiation factor 3 subunit H	7	7	0.0262252	0.68742	623044	981539	764154	1.10019e+06	1.27176e+06	1.05667e+06	1.09844e+06	T	24	1	0.242658	-0.540736	39807	NSHLINVLMWELEKK|ASITFEHMFEEVPIVIK|SAVADKHELLSLASSNHLGK|NSHLINVLMWELEK|QVQIDGLVVLK|TAQGSLSLK|LFKPHQAPAR		0.23295	0	17.2918	0
Q8K2F8	Lsm14a	Mus musculus	Protein LSM14 homolog A	12	12	0.0262993	0.496851	1.60704e+06	1.89772e+06	1.6934e+06	4.18714e+06	5352558	2.40953e+06	2.71255e+06	T	69	1	0.242074	-1.00912	50515.3	AEIRYEGILYTIDTENSTVALAK|DFDFESANAQFNKEEIDREFHNK|RPTWAEER|SFFDNISCDDNRER|RPTWAEERR|SGGTPYIGSK|GSDIKDLTVCEPPKPQCSLPQDPAIVQSSLGSSSSSFQSVGSYGPFGR|EFADFEYRK|EFADFEYR|DGPMKFEK|SFFDNISCDDNR|SVKPQLAQGR		0.33333	0	16.3505	0
P29351	Ptpn6	Mus musculus	Tyrosine-protein phosphatase non-receptor type 6	7	7	0.0263239	0.749425	820458	679403	758876	1.11763e+06	1.13252e+06	915211	869015	T	27	1	0.240589	-0.416144	67517.2	DLSGPDAETLLK|YTVGGSETFDSLTDLVEHFKK|TLQISPLDNGDLVR|NQLLGPDENSK|VNAADIENR|GLDCDIDIQK|VIVMTTR		0.14118	0	12.1334	0
P24547	Impdh2	Mus musculus	Inosine-5'-monophosphate dehydrogenase 2	16	15	0.0264175	0.616713	2.5635e+06	3.14351e+06	2.99456e+06	4326644	6435354	3.56091e+06	4862100	T	107	1	0.240098	-0.697328	55779.8	RFGVPVIADGGIQNVGHIAK|KYEQGFITDPVVLSPK|FGVPVIADGGIQNVGHIAK|REDLVVAPAGVTLK|DIDFLKEEEHDRFLEEIMTK|VAQGVSGAVQDK|FVPYLIAGIQHSCQDIGAK|HGFCGIPITDTGR|NLIDAGVDALR|VAQGVSGAVQDKGSIHK|TSSAQVEGGVHSLHSYEK|GMGSLDAMDKHLSSQNR|YFSEADKIK|AMMYSGELK|VRDVFEAK	EANEILQR	0.38716	0	22.282	0
Q922K7	Nop2	Mus musculus	Probable 28S rRNA (cytosine-C(5))-methyltransferase	22	22	0.0264272	1.24563	7.25953e+06	6.62395e+06	7203839	5.21206e+06	5232735	6618100	5598766	T	166	1	0.238642	0.316875	86698.7	VLLDAPCSGTGVISKDPAVK|FSNSIPQPHAGNSAAATPTEPDLKDQVTPK|ELLLSAIDSVNAASK|NTGVILANDANADRLK|GPGLSTEPSVPDAQVSTRPSQSAGNADVNSKR|GPGLSTEPSVPDAQVSTRPSQSAGNADVNSK|LVPTGLDFGQEGFTR|TSYIAQLMK|AGSVDVPKPNKSPGIK|LGVTNTIISHYDGR|FLPAAGDENSKR|IQDIVGVLR|GVNLDPLGK|ILDMCCAPGGK|GAETELVR|IQDIVGVLRDFGAQREEGR|DLATYYSYGDFLLSK|DFGAQREEGR|TLPGELSK|VVGGFDR|SVVGNLHR|EAAVPKPSAPSR		0.34805	0	17.2986	0
Q64152	Btf3	Mus musculus	Transcription factor BTF3	5	5	0.0266513	0.618179	803407	1.44045e+06	948275	1.71704e+06	1.77985e+06	1.46016e+06	1.73701e+06	T	14	1	0.239783	-0.693902	22017.4	LGVNNISGIEEVNMFTNQGTVIHFNNPK|KLGVNNISGIEEVNMFTNQGTVIHFNNPK|VQASLAANTFTITGHAETK|APLATGEDDDDEVPDLVENFDEASKNEAN|RLAEALPK		0.41667	0	19.3047	0
P48036	Anxa5	Mus musculus	Annexin A5	5	4	0.0268589	0.655793	309175	444513	410339	486393	724349	545864	607980	T	12	1	0.240383	-0.608688	35730.2	DLVDDLKSELTGKFEK|GTVTDFPGFDGR|SNAQRQEIAQEFK|TPEELSAIK	VLTEIIASR	0.18495	0	15.2545	0
P97376	Frg1	Mus musculus	Protein FRG1	17	16	0.0269862	0.557902	3.89144e+06	4223227	3.98515e+06	8.24948e+06	10624621	5.48762e+06	5.66555e+06	T	150	1	0.239476	-0.841915	29109.1	YLGINSDGLVVGR|NKTAGEEEMIKIR|EQWEPVFQDGK|EVDEGPSPPEQFTAVK|TAGEEEMIKIR|DGFLHETLLDRR|TAGEEEMIK|NKTAGEEEMIK|CNEAGDIEAK|KFQSFQDHK|QCEINYVK|QCEINYVKK|DGFLHETLLDR|GAYIHALDNGLFTLGAPHR|KDGFLHETLLDRR|GAYIHALDNGLFTLGAPHREVDEGPSPPEQFTAVK	MALLASNSCFIR	0.48062	0	15.3903	0
P97762	rp9	Mus musculus	Retinitis pigmentosa 9 protein homolog	8	7	0.0270445	0.671095	1050134	1.63594e+06	1.06323e+06	1.87791e+06	1.93609e+06	1.64601e+06	1.83943e+06	T	49	1	0.239266	-0.575412	25246	HDAQQLQQLK|RHDAQQLQQLK|RPREPPEHELQR|EFLAHAPTK|TGDKECPFFIK|GLWMPLGR|EPPEHELQR	VAHEDPMYDIIR	0.29577	0	15.2746	0
Q9DBG7	Srpra	Mus musculus	Signal recognition particle receptor subunit alpha	6	6	0.0275129	1.29823	658168	785367	648704	522149	463498	558184	607081	T	16	1	0.244259	0.376548	69579.1	NQGFDVVLVDTAGR|GGNNSFTHEALTLK|GTLGGMFGMLK|ALADHSMAQTPR|SVLLQER|TMVQLFEK		0.10377	0	11.1516	0
Q9EQM6	Dgcr8	Mus musculus	Microprocessor complex subunit DGCR8	1	1	0.027748	0.815625	161660	155346	162170	227486	198395	183596	177360	T	4	1	0.244702	-0.294022	86267.1	LITLSVQDAPTKK		0.01682	0.00960219	9.08447	0.000749886
Q06185	Atp5me	Mus musculus	ATP synthase subunit e, mitochondrial	3	3	0.0278244	0.605541	385872	437620	597889	711947	1.01193e+06	620836	781745	T	11	1	0.244488	-0.723704	8230.47	IERELAEAQDDSILK|ELAEAQDDSILK|YSYLKPR		0.30986	0	14.2042	0
P13020	Gsn	Mus musculus	Gelsolin	11	9	0.027834	0.760591	1.48419e+06	1.56778e+06	1.53644e+06	1.79318e+06	2.49359e+06	1.85085e+06	1.97377e+06	T	39	1	0.243075	-0.394807	85888.1	SQHVQVEEGSEPDAFWEALGGK|NWRDPDQTDGPGLGYLSSHIANVER|SGALNSNDAFVLK|TPITVVR|TASDFISK|TPSAAYLWVGAGASEAEKTGAQELLK|DGGQTAPASIR|SEDCFILDHGR|TGAQELLK	AGKEPGLQIWR|HVVPNEVVVQR	0.1859	0	14.1937	0
Q9CQA6	Chchd1	Mus musculus	Small ribosomal subunit protein mS37	1	1	0.0279874	0.44494	326851	253074	380880	1.06228e+06	957094	545473	457796	T	11	1	0.243885	-1.16832	13598.9	SIQESLGQSESLSPHK		0.13559	0	13.2096	0
Q9QUM9	Psma6	Mus musculus	Proteasome subunit alpha type-6	6	6	0.0281627	0.635453	556075	769539	822824	993070	1.28293e+06	911281	1.31338e+06	T	27	1	0.243543	-0.654142	27354.8	AINQGGLTSVAVR|LYQVEYAFK|LLDSSTVTHLFK|KVPDKLLDSSTVTHLFK|GKDCAVIVTQK|HITIFSPEGR		0.2439	0	14.16	0
C0HKD8|C0HKD9	Mfap1a|Mfap1b	Mus musculus	Microfibrillar-associated protein 1A|Microfibrillar-associated protein 1B	25	0	0.0281656	0.445747	3.44384e+06	4.42944e+06	4290320	11982767	14276334	6234779	6.26362e+06	T	197	2	0.242159	-1.1657	51922.7		QPPIQSTAGAVPVRNEKGEISMEK|LEREDSSEEEEEEIDDEEIER|YTHLVDQDTTSFDSAWGQESAQNTK|SLAALDALNTDDENDEEEYEAWKVR|TKYTHLVDQDTTSFDSAWGQESAQNTK|AKEQEAEPEEQEEDSSSDPR|QPPIQSTAGAVPVRNEK|KNEEMEVMEVEDEGR|GAFFMDEDEEVYKR|AAGVRDVFERPSAK|RPDYAPMESSDEEDEEFQFIKK|QPPIQSTAGAVPVR|DVFERPSAK|DFSAPTLEDHFNKTILPK|DFSAPTLEDHFNK|GAFFMDEDEEVYKRDFSAPTLEDHFNK|ISEDVEER|EAEALKQKELEQEAK|MRNLTEEER|EALEKEKAEIER|EQEAEPEEQEEDSSSDPR|SVPSALMK|GE…	0.63326|0.63326	0	21.1839	0
Q9CQF0	Mrpl11	Mus musculus	Large ribosomal subunit protein uL11m	3	3	0.0282037	1.48291	269396	219891	280501	172243	162110	222370	141220	T	10	1	0.24104	0.568429	20667.3	IGQPTVSYFLK|TLKKPEAGGVIR|AVFLAAQK		0.16146	0	10.1744	0
P56382	Atp5f1e	Mus musculus	ATP synthase subunit epsilon, mitochondrial	3	3	0.0284168	0.563702	722183	834834	787074	1.64243e+06	1.97031e+06	1.05908e+06	1.06956e+06	T	36	1	0.241371	-0.826995	5834.15	DALKTEFK|QAGLSYIR|FSQICAK		0.44231	0.00149402	9.29545	7.70852e-05
Q7TMM9	Tubb2a	Mus musculus	Tubulin beta-2A chain	31	1	0.028468	1.69244	519924	365980	473142	212110	281389	223928	367972	T	717	1	0.240425	0.759108	49875	INVYYNEAAGNKYVPR	SGPFGQIFRPDNFVFGQSGAGNNWAK|GHYTEGAELVDSVLDVVR|GHYTEGAELVDSVLDVVRK|MSMKEVDEQMLNVQNKNSSYFVEWIPNNVK|FWEVISDEHGIDPTGSYHGDSDLQLER|KESESCDCLQGFQLTHSLGGGTGSGMGTLLISK|LTTPTYGDLNHLVSATMSGVTTCLR|KLAVNMVPFPR|TLKLTTPTYGDLNHLVSATMSGVTTCLR|MSMKEVDEQMLNVQNK|AILVDLEPGTMDSVR|IREEYPDRIMNTFSVMPSPK|LHFFMPGFAPLTSR|ESESCDCLQGFQLTHSLGGGTGSGMGTLLISK|EVDEQMLNVQNK|FPGQLNADLR|IMNTFSVMPSPK|FPGQLNADLRK|LAVNMVPFPR|ISEQFTAMFR|…	0.68539	0	26.2724	0
Q8BHG9	Cggbp1	Mus musculus	CGG triplet repeat-binding protein 1	6	6	0.0286798	0.719752	795456	582835	732199	970417	1.15829e+06	898658	873547	T	29	1	0.241778	-0.474428	18749.6	QRPLTASLQCNSPAQTEK|ASVIQDFVK|RKAEFEEQNVR|MCLEANIPLEK|KAEFEEQNVR|FVVTAPPAR		0.34731	0	13.0946	0
P63254	Crip1	Mus musculus	Cysteine-rich protein 1	4	4	0.0289096	0.529368	518804	498334	663722	1.16501e+06	1.58668e+06	747758	878490	T	21	1	0.24263	-0.917658	8543.99	TLTSGGHAEHEGKPYCNHPCYSAMFGPK|CDKEVYFAER|GFGRGGAESHTFK|VTSLGKDWHRPCLK		0.84416	0	12.0922	0
Q61545	Ewsr1	Mus musculus	RNA-binding protein EWS	8	6	0.0290002	0.561137	3.72495e+06	3.42487e+06	2.83452e+06	7.72026e+06	7.52218e+06	4.28919e+06	4842073	T	131	1	0.242176	-0.833576	68419.8	AAVEWFDGKDFQGSK|QDHPSSMGVYGQESGGFSGPGENR|AGDWQCPNPGCGNQNFAWR|GGPGGPGGPGGPMGR|TGQPMIHIYLDKETGKPK|GDATVSYEDPPTAK	RGGPGGPPGPLMEQMGGR|GMPPPLRGGPGGPGGPGGPMGR	0.19847	0	18.3742	0
Q9CQF3	Nudt21	Mus musculus	Cleavage and polyadenylation specificity factor subunit 5	16	16	0.0290394	0.477057	2215040	2844322	2.4534e+06	6826005	7.87465e+06	3.96841e+06	3.48505e+06	T	149	1	0.241814	-1.06777	26223.7	LVAAPLFELYDNAPGYGPIISSLPQLLSR|LPGGELNPGEDEVEGLKR|TINLYPLTNYTFGTKEPLYEKDSSVAAR|GVNQFGNKYIQQTKPLTLER|TINLYPLTNYTFGTKEPLYEK|LFLVQLQEK|MREEFDKIGMR|KLFLVQLQEK|YIQQTKPLTLER|TVEGVLIVHEHR|LMTEILGR|EPLYEKDSSVAAR|TINLYPLTNYTFGTK|GVNQFGNK|SQTGWPR|SVVPPNR		0.66079	0	23.3521	0
P10853|P10854|Q64475|Q64478|Q64525|Q6ZWY9|Q8CGP1|Q8CGP2	H2bc7|H2bc14|H2bc3|H2bc9|Hist2h2bb|H2bc4|H2bc12|Hist1h2bp	Mus musculus	Histone H2B type 1-F/J/L|Histone H2B type 1-M|Histone H2B type 1-B|Histone H2B type 1-H|Histone H2B type 2-B|Histone H2B type 1-C/E/G|Histone H2B type 1-K|Histone H2B type 1-P	8	0	0.029056	1.49692	6.75506e+06	8324926	11296517	6.09838e+06	5480216	6.16859e+06	5.27575e+06	T	135	8	0.2405	0.581994	13927.568061475153|13927.568061475155|13943.562976094723|13911.573146855584|13911.573146855584|13897.557496791123|13911.573146855584|13983.630661732994		AMGIMNSFVNDIFER|KESYSVYVYK|SRKESYSVYVYK|VLKQVHPDTGISSK|QVHPDTGISSK|ESYSVYVYK|LLLPGELAK|EIQTAVR	0.45238|0.45238|0.45238|0.45238|0.45238|0.45238|0.45238|0.45238	0	18.4011	0
Q922Q2	Riok1	Mus musculus	Serine/threonine-protein kinase RIO1	8	8	0.0291234	0.635302	550045	662333	598013	967052	1.32267e+06	787672	798753	T	21	1	0.2392	-0.654485	64869.3	HAVAVMTVR|SHVLLMGFIGKDDMPAPLLK|TSQDHVDEEVFK|TSQDHVDEEVFKQAYIPR|TANIPCPEPIR|NHIADPDIDKKER|AMEIASQR|LLHKDHISEIHGCISTGK		0.17108	0	10.1274	0
Q4FK66	Prpf38a	Mus musculus	Pre-mRNA-splicing factor 38A	15	13	0.0294113	0.546938	8357524	10686648	7.99514e+06	23545014	19089720	12440100	12756141	T	206	1	0.242215	-0.870551	37413.4	YVLEEAEQLEPR|DAHSIHGTNPQYLVEK|FVGGVYGGNIKPTPFLCLTLK|RYVLEEAEQLEPR|YWKEECFGLTAELVVDK|TVKDAHSIHGTNPQYLVEK|LTGTAIDCYK|SYRDLDKPR|YLEPLYNDYRK|VCDIILPR|YLEPLYNDYR|MLQIQPEKDIIVEFIK|DIIVEFIKNEDFK	MLQIQPEKDIIVEFIKNEDFK|MLGALYMR	0.4391	0	22.2744	0
Q5SUF2	Luc7l3	Mus musculus	Luc7-like protein 3	16	15	0.0294335	0.514892	3.35781e+06	3.80576e+06	3570438	8236720	10739293	5.26995e+06	4976139	T	132	1	0.24139	-0.957659	51419.1	STTSTIESFAAQEK|LALSQNQQSSGAAGPTGKNEEK|MISAAQLLDELMGRDR|LVEQLKEERELLR|LVEQLKEER|IKATVEELKEK|LALSQNQQSSGAAGPTGK|YLQSLLAEVER|YLQSLLAEVERR|VDDHLMGK|SDLGPCEKIHDENLR|WDHESVCK|ATVEELKEK|SDLGPCEK|SNVRWDHESVCK	MISAAQLLDELMGR	0.28472	0	18.4981	0
O70133	Dhx9	Mus musculus	ATP-dependent RNA helicase A	23	23	0.0295782	1.35401	3.9178e+06	4491228	4152465	2.63709e+06	2.77399e+06	3.33985e+06	3.71967e+06	T	72	1	0.241085	0.43724	149381	TTQVPQYILDDFIQNDR|QLYHLGVIEAYSGLTK|GISHVIVDEIHER|AAECNIVVTQPR|RGYGGGYFGQGRGGGGGGGY|LAAQSCALSLVR|TPLHEIALSIK|QISRPSAAGINLMIGSVR|LGGIGQFLAK|SSVNCPFSSQDMKYPSPFFVFGEK|YPSPFFVFGEK|KVFDPVPDGVTK|GANLKDYYSR|VRPGFCFHLCSR|YQILPLHSQIPR|VEGFNYAGMGNSTNKK|DFVNYLVR|LETHMTPEMFR|LNQYFQK|KMTPAYEIR|LAHFEPSQR|FDRLETHMTPEMFR|LNMATLR		0.19493	0	17.2697	0
P84104	Srsf3	Mus musculus	Serine/arginine-rich splicing factor 3	13	11	0.029649	0.503213	6484753	6088071	6210034	14138841	20185036	9613844	8721857	T	188	1	0.240317	-0.990759	19317.9	VYVGNLGNNGNKTELER|VRVELSNGEK|NPPGFAFVEFEDPRDAADAVR|VYVGNLGNNGNK|NPPGFAFVEFEDPRDAADAVRELDGR|VRVELSNGEKR|NRGPPPSWGR|AFGYYGPLR|DSCPLDCK|GPPPSWGR|DAADAVRELDGR	NPPGFAFVEFEDPR|MHRDSCPLDCK	0.5122	0	16.4148	0
P07724	Alb	Mus musculus	Albumin	40	37	0.029819	0.449397	8065373	8961450	9887648	26551194	31649304	14189288	13138028	T	388	1	0.240695	-1.15394	68647.7	VNKECCHGDLLECADDRAELAK|CCAEANPPACYGTVLAEFQPLVEEPK|APQVSTPTLVEAAR|SLHTLFGDKLCAIPNLR|AADKDTCFSTEGPNLVTR|TNCDLYEKLGEYGFQNAILVR|GLVLIAFSQYLQK|RHPDYSVSLLLR|SLHTLFGDKLCAIPNLRENYGELADCCTK|TCVADESAANCDK|KQTALAELVK|LSQTFPNADFAEITK|AHCLSEVEHDTMPADLPAIAADFVEDQEVCK|EFKAETFTFHSDICTLPEKEK|YTQKAPQVSTPTLVEAAR|RPCFSALTVDETYVPK|LVQEVTDFAK|AHCLSEVEHDTMPADLPAIAADFVEDQEVCKNYAEAK|AETFTFHSDICTLPEKEK|KYEATLEK|ENPTTFMGHY…	TVMDDFAQFLDTCCK|YMCENQATISSK|SLHTLFGDK	0.67105	0	21.2126	0
P61087	Ube2k	Mus musculus	Ubiquitin-conjugating enzyme E2 K	2	2	0.0299727	0.749041	149273	181662	215073	221131	251074	254603	235922	T	5	1	0.240775	-0.416883	22392.6	ANIAVQR|NAVIVALSSK		0.085	0.000503778	9.13762	4.14662e-05
P62267	Rps23	Mus musculus	Small ribosomal subunit protein uS12	13	13	0.0301398	1.40208	5919483	5072231	4.83823e+06	3148146	3.55315e+06	4.72166e+06	3.74143e+06	T	119	1	0.240646	0.48757	15797.7	KITAFVPNDGCLNFIEENDEVLVAGFGRK|KGHAVGDIPGVR|VANVSLLALYK|GHAVGDIPGVR|ANPFGGASHAK|VGVEAKQPNSAIR|KAHLGTALKANPFGGASHAK|AHLGTALKANPFGGASHAK|AHLGTALK|VGVEAKQPNSAIRK|KITAFVPNDGCLNFIEENDEVLVAGFGR|DQKWHDKQYK|GIVLEKVGVEAK		0.70629	0	16.3056	0
Q9CZH3	Psmg3	Mus musculus	Proteasome assembly chaperone 3	1	1	0.0303381	2.02954	174233	168180	159438	122737	66360.5	107280	52682.3	T	2	1	0.241244	1.02115	13322.2	MEDKPLVVSK		0.08197	0.0087116	9.06286	0.000734802
Q6NZB0	Dnajc8	Mus musculus	DnaJ homolog subfamily C member 8	8	8	0.0303782	0.595051	489862	660319	901548	1.17369e+06	1.3557e+06	993335	975874	T	35	1	0.240165	-0.748915	29794.4	EGKPTNVEEDDPELFK|AFEAVDKAYK|ALDVIQAGK|QREEEIEAQEK|LFAELEIK|LLLDQEQK|AFEAVDK|QLSILVHPDKNQDDADRAQK		0.32411	0	10.1035	0
Q8JZQ2	Afg3l2	Mus musculus	AFG3-like protein 2	5	4	0.0304005	1.47872	651678	595731	637585	330215	457907	549571	391160	T	16	1	0.239262	0.564349	89462.6	HLSDAINEKHFEQAIER|TVALLTEK|GAILTGPPGTGK|VGQISFDLPR	HFEQAIER	0.0586	0	12.0532	0
Q60872	Eif1a	Mus musculus	Eukaryotic translation initiation factor 1A	10	3	0.030455	0.580758	464382	594927	603583	1.33444e+06	1.04458e+06	694488	833455	T	102	1	0.238714	-0.78399	16492.2	KVWINTSDIILIGLR|KKVWINTSDIILIGLR|LEAMCFDGVRR	DYQDNKADVILK|ELVFKEDGQEYAQVIK|LEAMCFDGVR|AYGELPEHAK|SLKAYGELPEHAK|YNADEAR|DYQDNKADVILKYNADEAR	0.52083	0	15.344	0
A2APX8	Scn1a	Mus musculus	Sodium channel protein type 1 subunit alpha	2	1	0.0307597	0.359341	847617	394521	845012	2.2568e+06	2931384	1.65396e+06	1.01639e+06	T	3	1	0.239797	-1.47657	228651	FSNIFLIWDCSPYWLK	SWPTLNMLIK	0.01294	0.000503778	10.0808	5.37324e-05
Q9CPW7	Zmat2	Mus musculus	Zinc finger matrin-type protein 2	2	2	0.0309205	0.575645	312972	300329	314528	547828	830347	425648	429973	T	18	1	0.239414	-0.796748	23596.9	HRDYKVDLESK|NLGMSMR		0.09045	0	10.1046	0
P35700	Prdx1	Mus musculus	Peroxiredoxin-1	21	13	0.0310444	0.809378	15907486	20141078	18362322	21660722	24553172	20782316	22390772	T	254	1	0.239477	-0.305114	22162.4	KLNCQVIGASVDSHFCHLAWINTPK|QGGLGPMNIPLISDPKR|LNCQVIGASVDSHFCHLAWINTPK|HGEVCPAGWKPGSDTIKPDVNK|ATAVMPDGQFKDISLSEYKGK|LNCQVIGASVDSHFCHLAWINTPKK|KQGGLGPMNIPLISDPK|ATAVMPDGQFKDISLSEYK|IGYPAPNFK|QGGLGPMNIPLISDPK|DISLSEYK|DISLSEYKGK|SVDEIIR	KQGGLGPMNIPLISDPKR|TIAQDYGVLKADEGISFR|LVQAFQFTDK|GLFIIDDKGILR|ATAVMPDGQFK|ADEGISFR|TIAQDYGVLK|GLFIIDDK	0.71357	0	22.3765	0
O09131	Gsto1	Mus musculus	Glutathione S-transferase omega-1	4	2	0.0310858	0.559066	217730	277659	333547	548302	662373	343538	450299	T	13	1	0.23878	-0.838909	27479.9	VPPLIASFVR|LEALELKECLAHTPK	GIRHEVININLK|HEVININLK	0.15417	0	10.1151	0
P62876	Polr2l	Mus musculus	DNA-directed RNA polymerases I, II, and III subunit RPABC5	2	2	0.0313598	1.36202	297026	358976	282675	237527	254055	185141	243958	T	4	1	0.24006	0.445751	7639.99	LLNYAPLEK|MLLAHVDLIEK		0.29851	0.000503778	10.201	4.14662e-05
Q9ESX5	Dkc1	Mus musculus	H/ACA ribonucleoprotein complex subunit DKC1	10	10	0.0314754	1.40142	982559	915766	872511	798254	553244	746537	569512	T	21	1	0.240337	0.48689	57365.3	KPLQEDDVAEIQHAEEFLIKPESK|TGFINLDKPSNPSSHEVVAWIR|ADAEVITFPK|LHNAIEGGTQLSR|TAHYTPLPCGSNPLKR|SQQSAGKEYVGIVR|VAQLDTSQWPLLLK|ALETLTGALFQRPPLIAAVKR|RVVYPLEK|ALETLTGALFQRPPLIAAVK		0.27898	0	14.1762	0
P17751	Tpi1	Mus musculus	Triosephosphate isomerase	16	16	0.0319181	0.632513	5232555	6837087	7.74607e+06	10214794	13317136	8056112	10300175	T	142	1	0.243665	-0.660833	26695.8	VSHALAEGLGVIACIGEK|VVLAYEPVWAIGTGK|VSHALAEGLGVIACIGEKLDEREAGITEK|RHVFGESDELIGQK|VSHALAEGLGVIACIGEKLDER|IIYGGSVTGATCK|HVFGESDELIGQK|VTNGAFTGEISPGMIK|SNVNDGVAQSTR|IAVAAQNCYK|TATPQQAQEVHEK|VIADNVKDWSK|DLGATWVVLGHSERR|DLGATWVVLGHSER|FFVGGNWK|VVFEQTK		0.6506	0	19.2826	0
P05064	Aldoa	Mus musculus	Fructose-bisphosphate aldolase A	39	9	0.0319228	1.21693	39314692	37353776	31858240	28692112	27460662	32119220	30374344	T	568	1	0.242471	0.283252	39331.3	ALSDHHVYLEGTLLKPNMVTPGHACTQK|PHPYPALTPEQKK|FSNEEIAMATVTALR|AAQEEYIKR|PHPYPALTPEQKKELSDIAHR|ENLKAAQEEYIKR|PHPYPALTPEQK|YTPSGQSGAAASESLFISNHAY|AAQEEYIK	GGVVGIKVDKGVVPLAGTNGETTTQGLDGLSER|VDKGVVPLAGTNGETTTQGLDGLSER|GVVPLAGTNGETTTQGLDGLSER|IVAPGKGILAADESTGSIAKR|YASICQQNGIVPIVEPEILPDGDHDLKR|IGEHTPSALAIMENANVLAR|GILAADESTGSIAKR|IVAPGKGILAADESTGSIAK|GILAADESTGSIAK|QLLLTADDRVNPCIGGVILFHETLYQK|FSNEEIAMATVTALRR|TVPPAVTGVTFLSGGQSEEEASINLNAINK|ADDGRPFPQVIK|CPLLKPWALTFSYGR|RLQSIGTENTEENRR|TVPPAVTGVTFLSGGQSEEEASINLNAINKCPLLKPWALTFSYGR|GGVVGIKVDK|VNPCIGGVILFH…	0.95055	0	26.2702	0
Q673H1	Tusc1	Mus musculus	Tumor suppressor candidate gene 1 protein homolog	1	1	0.0319828	0.431737	3.75645e+06	1577936	3388620	7.02907e+06	4.3384e+06	6.02106e+06	8558762	T	81	1	0.241717	-1.21178	22698.7	LPGDSGER		0.03902	0.000503778	9.31944	4.14662e-05
Q791V5	Mtch2	Mus musculus	Mitochondrial carrier homolog 2	1	1	0.0321218	0.589535	326718	281535	201361	588484	454955	338419	447760	T	4	1	0.242136	-0.762352	33477	LCSGVLGTVVHGK		0.0429	0	10.0607	0
P60710	Actb	Mus musculus	Actin, cytoplasmic 1	40	0	0.0323982	0.681744	2.24036e+06	2.0088e+06	2.26081e+06	3.49777e+06	4.09644e+06	2573131	2.7683e+06	T	936	1	0.243169	-0.552699	41709.7		YPIEHGIVTNWDDMEK|HQGVMVGMGQKDSYVGDEAQSKR|KDLYANTVLSGGTTMYPGIADR|CPEALFQPSFLGMESCGIHETTFNSIMK|FRCPEALFQPSFLGMESCGIHETTFNSIMK|DDDIAALVVDNGSGMCK|VAPEEHPVLLTEAPLNPK|LCYVALDFEQEMATAASSSSLEK|EKLCYVALDFEQEMATAASSSSLEK|TTGIVMDSGDGVTHTVPIYEGYALPHAILR|CDVDIRKDLYANTVLSGGTTMYPGIADR|HQGVMVGMGQKDSYVGDEAQSK|HQGVMVGMGQK|MQKEITALAPSTMK|DLYANTVLSGGTTMYPGIADR|SYELPDGQVITIGNER|LDLAGRDLTDYLMK|EITALAPSTMK|QEYDESGPSIVH…	0.82667	0	26.3127	0
Q9CQX2	Cyb5b	Mus musculus	Cytochrome b5 type B	1	1	0.0334826	0.397084	121587	95845.3	92831.5	159734	455376	356701	172160	T	3	1	0.250788	-1.33248	16307.8	NSAEETWMVIHGR		0.08904	0	10.1067	0
Q9D1R9	Rpl34	Mus musculus	Large ribosomal subunit protein eL34	12	12	0.0335505	1.68131	6.43461e+06	5809967	5854743	2.78771e+06	2.87009e+06	5.25739e+06	3924329	T	90	1	0.249589	0.749587	13284.4	AFLIEEQKIVVK|RAFLIEEQK|RAFLIEEQKIVVK|RLSYNTASNK|LSYNTASNKTR|SACGVCPGR|RLSYNTASNKTR|AYGGSMCAK|LSYNTASNK|AFLIEEQK|IVYLYTK|IVYLYTKK		0.4359	0	15.2201	0
P15864	H1-2	Mus musculus	Histone H1.2	16	3	0.0338971	1.3824	1.76136e+06	1.2987e+06	1.64619e+06	1.06919e+06	981333	1.35496e+06	1.12837e+06	T	189	1	0.25059	0.467176	21253.7	SEAAPAAPAAAPPAEKAPAK|SEAAPAAPAAAPPAEKAPAKK|GILVQTK	KALAAAGYDVEKNNSR|ALAAAGYDVEKNNSR|KASGPPVSELITK|ASGPPVSELITK|SGVSLAALKK|ALAAAGYDVEK|GTGASGSFKLNKK|KALAAAGYDVEK|GTGASGSFKLNK|ERSGVSLAALKK|RKASGPPVSELITK|SGVSLAALK|GTGASGSFK	0.38679	0	23.3405	0
Q9CPY7	Lap3	Mus musculus	Cytosol aminopeptidase	12	12	0.0341055	0.653926	927764	1.00024e+06	1.02541e+06	1.29709e+06	1.89935e+06	1.15325e+06	1.80152e+06	T	38	1	0.251583	-0.612801	56105.7	SAGVDDQENWHEGKENIR|DKDDDLPQFTSAGESFNK|GVLFASGQNLAR|TIQVDNTDAEGR|SAGACTAAAFLR|HLMESPANEMTPTR|LHGSGDLEAWEK|GLVLGIYAK|FAEIIEK|LILADALCYAHTFNPK|TFYGLHQDFPSVVVVGLGKR|GITFDSGGISIK		0.31214	0	12.1592	0
Q99LB6	Mat2b	Mus musculus	Methionine adenosyltransferase 2 subunit beta	1	1	0.0344214	0.36201	48989.6	152237	189435	336563	306844	295931	302030	T	6	1	0.254321	-1.4659	37369	VLITGATGLLGR		0.03593	0	13.1714	0
Q04750	Top1	Mus musculus	DNA topoisomerase 1	18	16	0.0353961	0.773614	2.31415e+06	2.45356e+06	2.47491e+06	3.01947e+06	3.74324e+06	2.61338e+06	3.20516e+06	T	66	1	0.259944	-0.370315	90818.9	VEHINLHPELDGQEYVVEFDFPGKDSIR|SGDHLHNDSQIEADFR|LRDEDDADYKPK|IANFKIEPPGLFR|ELTAPDENVPAK|AGNEKEEGETADTVGCCSLR|AEEVATFFAK|CDFTQMSQYFK|EMTNDEKNTITNLSK|YYNKVPVEKR|LEVQATDREENKQIALGTSK|NLQLFMENKQPEDDLFDRLNTGILNK|SMMNLQSK|AVALYFIDK|EKENGFSSPPR|YIMLNPSSR	LNYLDPR|HLQDLMEGLTAK	0.32464	0	19.2202	0
Q99JY0	Hadhb	Mus musculus	Trifunctional enzyme subunit beta, mitochondrial	2	2	0.0354483	0.830371	353673	382567	361431	449656	418275	396157	504835	T	14	1	0.259028	-0.268172	51353.4	LAAAFAVSR|NIVVVEGVR		0.03789	0.000503778	11.4536	5.37324e-05
P97496	Smarcc1	Mus musculus	SWI/SNF complex subunit SMARCC1	10	7	0.0354611	0.847201	1.13192e+06	1.04485e+06	1.12857e+06	1.35875e+06	1.14139e+06	1.4025e+06	1.31152e+06	T	33	1	0.257823	-0.239223	122813	KVEHEISEGNVATAAAAALASAATK|NLTGDVCAVMR|TLVQNNCLTRPNIYLIPDIDLK|AALEEFSR|VREEVPLELVEAHVK|EKPIDLQNFGLR|LPIEDPYLENSDASLGPLAYQPVPFSQSGNPVMSTVAFLASVVDPR	SLVALLVETQMK|SKTPEIYLAYR|NFMIDTYR	0.15399	0	13.0397	0
Q9QUR7	Pin1	Mus musculus	Peptidyl-prolyl cis-trans isomerase NIMA-interacting 1	2	2	0.0361259	0.627117	186933	185016	249831	380500	374659	229180	350884	T	6	1	0.260074	-0.673194	18359.1	TGEMSGPVFTDSGIHIILR|GQMQKPFEDASFALR		0.20606	0	12.3249	0
Q91VJ4	Stk38	Mus musculus	Serine/threonine-protein kinase 38	27	22	0.0364038	0.529349	5680918	7.35523e+06	6.23432e+06	17976602	14975388	8585610	9167407	T	277	1	0.260829	-0.917709	54139.4	KADMLEKEQVGHIR|AMTGSTPCSSMSNHTK|IGAPGVEEIKNNLFFEGVDWEHIR|TRLGLEDFESLK|LGLEDFESLKVIGR|VTLENFYSNLIAQHEER|VTLENFYSNLIAQHEEREMR|LGLEDFESLK|DTGHVYAMK|ERPAAISIEIK|DIKPDNLLLDSK|NLNHSLPSDFTFQNMNSKR|SIDDTSNFDEFPESDILKPTVTTSSHPETDYK|RFEGLTAR|NKDWVFINYTYK|NNLFFEGVDWEHIR|DIKPDNLLLDSKGHVK|FEGLTAR|FCCEWEHR|VMEEEGLKDEEK|GAIPSYMK|ADMLEKEQVGHIR	NLNHSLPSDFTFQNMNSK|LSDFGLCTGLKK|LSDFGLCTGLK|VMEEEGLKDEEKR|KETEFLR	0.52688	0	17.3429	0
Q8R035	Mrpl58	Mus musculus	Large ribosomal subunit protein mL62	5	5	0.0365827	0.768906	923006	815275	849827	1.01389e+06	1.39157e+06	1.02355e+06	1.09149e+06	T	19	1	0.261321	-0.37912	23462.3	AGELVLTSESSR|FHLASADWIEEPVR|NLAECLQK|LSISYCR|QASSYIPLDR		0.24757	0	13.3702	0
Q6NVF9	Cpsf6	Mus musculus	Cleavage and polyadenylation specificity factor subunit 6	15	15	0.0366204	0.435146	3.48226e+06	3.97515e+06	4.4454e+06	12480246	14985905	6654555	5444246	T	151	1	0.260804	-1.20043	59116.4	AVSDASAGDYGSAIETLVTAISLIK|TPLSEAEFEEIMNR|RELHGQSPVVTPCNK|GFALVGVGSEASSK|VLISSLQDCLHGIESK|QFLSQFEMQSR|GFALVGVGSEASSKK|GAAPNVVYTYTGK|ELHGQSPVVTPCNK|GAAPNVVYTYTGKR|GPPPTDPYGRPPPYDRGDYGPPGR|LMDLLPK|AISSSAISR|KLMDLLPK|GPPPTDPYGRPPPYDR		0.27223	0	23.3639	0
P10605	Ctsb	Mus musculus	Cathepsin B	4	4	0.0367192	0.734487	402101	491506	338687	491887	526477	578494	623357	T	15	1	0.260364	-0.445191	37255.7	SGVYKHEAGDMMGGHAIR|HEAGDMMGGHAIR|EQWSNCPTIGQIR|SCEAGYSPSYKEDKHFGYTSYSVSNSVK		0.17404	0	12.1384	0
Q7TPM1	Prrc2b	Mus musculus	Protein PRRC2B	1	1	0.0372999	0.46642	1.83636e+06	1.38127e+06	2750132	6.19043e+06	4841663	2.75461e+06	3411153	T	13	1	0.263747	-1.1003	160814	ESGSPAQEFSK		0.0074	0.00243072	8.18141	0.000174364
P49312	Hnrnpa1	Mus musculus	Heterogeneous nuclear ribonucleoprotein A1	24	18	0.0375242	1.25538	14794814	14187356	12620584	11417822	10517137	12748352	9640254	T	184	1	0.265099	0.328121	34175.3	NQGGYGGSSSSSSYGSGR|RGFAFVTFDDHDSVDKIVIQK|GFGFVTYATVEEVDAAMNARPHK|GFGFVTYATVEEVDAAMNARPHKVDGR|GFAFVTFDDHDSVDKIVIQK|SSGPYGGGGQYFAKPR|IEVIEIMTDR|SESPKEPEQLRK|SRGFGFVTYATVEEVDAAMNARPHK|SESPKEPEQLR|YHTVNGHNCEVR|EDSQRPGAHLTVKK|KLFIGGLSFETTDESLR|LFIGGLSFETTDESLR|NQGGYGGSSSSSSYGSGRR|YHTVNGHNCEVRK|EDSQRPGAHLTVK|IFVGGIKEDTEEHHLRDYFEQYGK	SGSGNFGGGRGGGFGGNDNFGR|SHFEQWGTLTDCVVMRDPNTKR|SKSESPKEPEQLR|ALSKQEMASASSSQRGR|GGNFSGRGGFGGSR|QEMASASSSQRGR	0.78438	0	21.4273	0
Q60848	Hells	Mus musculus	Lymphocyte-specific helicase	8	8	0.0377965	1.38866	1.15259e+06	1.29839e+06	1.10304e+06	748504	703839	1.00141e+06	994410	T	33	1	0.267677	0.473693	95065.2	EKVISDEDLELLLDRSDLIDQMK|IGQTKPVVVYR|LVTANTIDQK|SWDRESTEIR|TIANMFGSCEKETVELSPTGRPK|SLVDGNGEKPVMK|HFTGGVMR|ELMELLK		0.12789	0	19.2047	0
P47911	Rpl6	Mus musculus	Large ribosomal subunit protein eL6	23	21	0.0380298	1.50778	24172624	20618142	21352736	13374744	11202226	19715908	15332246	T	274	1	0.268536	0.59243	33488.9	SSITPGTVLIILTGR|HQEGEIFDTEK|QLDSGLLLVTGPLVINRVPLRR|VDISDVKIPK|KAGSDAAASRPR|HLTDAYFK|FVIATSTKVDISDVKIPK|HQEGEIFDTEKEK|IKAVPQLQGYLR|HLTDAYFKK|LLSHGKKPFSQHVR|AVDLQILPK|SQFSLTNGMYPHKLVF|AVPQLQGYLR|EKVLATVTK|FVIATSTK|THQKFVIATSTK|YYPTEDVPR|YYPTEDVPRK|YEITEQR|PFSQHVR	HQEGEIFDTEKEKYEITEQR|SQFSLTNGMYPHK	0.57432	0	23.3517	0
Q62318	Trim28	Mus musculus	Transcription intermediary factor 1-beta	47	34	0.0382482	1.21406	39753048	36029860	35965376	30828510	26862362	34954692	30478208	T	580	1	0.268676	0.279843	88790.5	QGSGSSQPMEVQEGYGFGSDDPYSSAEPHVSGMKR|DCQLNAHKDHQYQFLEDAVR|LSPPYSSPQEFAQDVGR|LTEDKADVQSIIGLQR|TVYCNVHKHEPLVLFCESCDTLTCR|LLPCLHSACSACLGPATPAAANNSGDGGSAGDGAMVDCPVCK|QFNKLTEDKADVQSIIGLQR|VLVNDAQKVTEGQQER|LDLDLTSDSQPPVFK|VSLERLDLDLTSDSQPPVFK|VFPGSTTEDYNLIVIER|QGSGSSQPMEVQEGYGFGSDDPYSSAEPHVSGMK|VLVNDAQKVTEGQQERLER|HEPLVLFCESCDTLTCR|KLLASLVK|SGEGEVSGLLR|ADVQSIIGLQR|MAILQIMKELNKR|FSAVLVEPPPLNLPSAGLSSQELSG…	RPAASSAAAASAAASSPAGGGGEAQELLEHCGVCR|LASPSGSTSSGLEVVAPEVTSAPVSGPGILDDSATICR|IVAERPGTNSTGPGPMAPPR|VLLALFCHEPCRPLHQLATDSTFSMEQPGGTLDLTLIR|IVAERPGTNSTGPGPMAPPRAPGPLSK|MIVDPVEPHGEMK|AASAAATAAASAATAASAASGSPGSGEGSAGGEKRPAASSAAAASAAASSPAGGGGEAQELLEHCGVCR|SRSGEGEVSGLLR|GAAAAAAGQAGTVPPGAPGAPPLPGMAIVKEEETEAAIGAPPAAPEGPETKPVLMPLTEGPGAEGPR|QQCYSKDIVENYFMR|DIVENYFMR|MNDAFGDTK|MAILQIMK	0.75779	0	30.2385	0
Q99L47	St13	Mus musculus	Hsc70-interacting protein	6	6	0.0383797	0.741637	880323	1.05474e+06	1.15802e+06	1182972	1.61874e+06	1.28379e+06	1.48113e+06	T	37	1	0.268673	-0.431214	41629.5	KGAAIEALNDGELQK|AIDLFTDAIKLNPR|QDPSVLHTEEMR|LAILYAK|AIEINPDSAQPYKWR|AIDLFTDAIK		0.16981	0	16.2045	0
P41105	Rpl28	Mus musculus	Large ribosomal subunit protein eL28	18	17	0.0384299	1.3066	10063711	8.14195e+06	9367008	6941097	5.86812e+06	8143837	7268673	T	178	1	0.268123	0.385819	15723.7	KTVGVEPAADGKGVVVVMK|NKQTYSTEPNNLK|TVGVEPAADGKGVVVVMK|TVGVEPAADGKGVVVVMKR|TVGVEPAADGK|KTVGVEPAADGK|QTYSTEPNNLK|NCSSFLIKR|NKQTYSTEPNNLKAR|SGQRKPATSYVR|KPATSYVR|NCSSFLIK|YNGLIHRK|GVVVVMKR|YNGLIHR|NSFRYNGLIHRK|QTYSTEPNNLKAR	SAHLQWMVVR	0.56204	0	23.3294	0
P99027	Rplp2	Mus musculus	Large ribosomal subunit protein P2	10	10	0.0384788	0.679849	1.60996e+06	2449737	2475431	2.96092e+06	3467824	2.73074e+06	3.48363e+06	T	74	1	0.267316	-0.556713	11643.8	ILDSVGIEADDDRLNKVISELNGK|YVASYLLAALGGNSSPSAK|KILDSVGIEADDDRLNK|ILDSVGIEADDDRLNK|NIEDVIAQGVGK|VISELNGKNIEDVIAQGVGK|LASVPAGGAVAVSAAPGSAAPAAGSAPAAAEEK|MRYVASYLLAALGGNSSPSAK|LASVPAGGAVAVSAAPGSAAPAAGSAPAAAEEKKDEK|VISELNGK		0.82609	0	19.1437	0
P70122	Sbds	Mus musculus	Ribosome maturation protein SBDS	6	6	0.0385496	0.712418	1059445	922630	1.01796e+06	1.71561e+06	1.5907e+06	1.12776e+06	1.25301e+06	T	48	1	0.26641	-0.489205	28762.3	SGVEKDLDEVLQTHSVFVNVSK|LTNVAVVR|SIFTPTNQIR|HTQLEQMFR|QQALEVIK|EIDELIKK		0.26	0	17.1192	0
Q9R020	Zranb2	Mus musculus	Zinc finger Ran-binding domain-containing protein 2	4	4	0.0389354	0.48315	576953	731697	577206	1.70512e+06	2.02538e+06	957870	844316	T	41	1	0.269217	-1.04946	37328	CGNVNFAR|TCSNVNWAR|GLFSANDWQCK|VSDGDWICPDKK		0.12121	0	10.213	0
Q9CQT1	Mri1	Mus musculus	Methylthioribose-1-phosphate isomerase	8	8	0.0389903	1.26769	1.38748e+06	1.30975e+06	1.38583e+06	1.21192e+06	887985	1.04508e+06	1.17964e+06	T	20	1	0.268052	0.342203	39386.3	GVSAVVVGADR|HLLEQTNPR|FAEDMLEKDLKDNR|DLGQVAAQEAEREGATEETVRER|FAEDMLEK|SLHEMGRLEHTFCTETRPYNQGAR|SIGDLGAR|YSPGSLQILDQLQLPEHCHYEALSSVQQASEAIR		0.33333	0	13.2518	0
E9Q5C9	Nolc1	Mus musculus	Nucleolar and coiled-body phosphoprotein 1	9	9	0.0391068	0.722394	888512	967143	932529	1.62416e+06	1.34862e+06	1.01703e+06	1226896	T	51	1	0.267379	-0.469142	73654.3	VREEEIEVDSR|VADNSFDAK|VVPSDLYPLVLR|FLRDSQLSEVASK|LETPNTFPK|VADNSFDAKR|GAAGDWGER|KVKLETPNTFPK|DSQLSEVASK		0.09544	0	12.3363	0
Q8C0I1	Agps	Mus musculus	Alkyldihydroxyacetonephosphate synthase, peroxisomal	1	1	0.0393626	0.723677	81328.6	68382.2	82226.6	108584	134585	99796.6	88079.5	T	1	1	0.268275	-0.466583	71638.3	NIYGNIEDLVVHMK		0.02171	0.00656353	8.05585	0.000629964
Q91W96	Anapc4	Mus musculus	Anaphase-promoting complex subunit 4	2	2	0.0394457	2.23668	46650.7	88763.1	114459	28027.5	25942.7	39860	50944.9	T	3	1	0.268308	1.16136	91649.3	DLIALANTTGEVLLHR|FGSFTSASADKVR		0.03594	0.000503778	9.10621	4.14662e-05
P52480	Pkm	Mus musculus	Pyruvate kinase PKM	49	43	0.0398057	0.814503	40628792	49315708	40027124	54211756	58864248	49357908	49891292	T	616	1	0.271013	-0.296007	57808	KGVNLPGAAVDLPAVSEKDIQDLK|AEGSDVANAVLDGADCIMLSGETAKGDYPLEAVR|PKPHSEAGTAFIQTQQLHAAMADTFLEHMCR|GADFLVTEVENGGSLGSK|FGVEQDVDMVFASFIR|EKGADFLVTEVENGGSLGSK|KGDVVIVLTGWRPGSGFTNTMR|EATESFASDPILYRPVAVALDTK|GADFLVTEVENGGSLGSKK|LAPITSDPTEAAAVGAVEASFK|EATESFASDPILYRPVAVALDTKGPEIR|AEGSDVANAVLDGADCIMLSGETAK|CCSGAIIVLTK|FGVEQDVDMVFASFIRK|LNFSHGTHEYHAETIK|PKPHSEAGTAFIQTQQLHAAMADTFLEHMCRLDIDSAPITAR|DAVLNAWAEDVDLR|…	RFDEILEASDGIMVAR|AGKPVICATQMLESMIK|GDLGIEIPAEKVFLAQK|SVEMLKEMIK|GDLGIEIPAEK|VNLAMDVGK	0.86629	0	27.3699	0
Q9D051	Pdhb	Mus musculus	Pyruvate dehydrogenase E1 component subunit beta, mitochondrial	10	9	0.0401453	0.878026	2180565	2.49459e+06	2.36774e+06	2.62788e+06	2.51579e+06	2.6611e+06	2.88735e+06	T	46	1	0.271847	-0.187665	38912	VTGADVPMPYAK|IMEGPAFNFLDAPAVR|EAINQGMDEELERDEKVFLLGEEVAQYDGAYK|VLEDNSVPQVK|VVSPWNSEDAK|EGIECEVINLR|DIIFAVKK|EAINQGMDEELERDEK|DFLIPIGK	TIRPMDIEAIEASVMK	0.34819	0	17.1904	0
P62858	Rps28	Mus musculus	Small ribosomal subunit protein eS28	8	7	0.0402804	0.686492	3.32369e+06	2856090	3148250	4.97593e+06	5.8769e+06	3.57426e+06	3.99513e+06	T	95	1	0.271426	-0.542684	7836.2	TGSQGQCTQVRVEFMDDTSR|GPVREGDVLTLLESER|EGDVLTLLESER|GPVREGDVLTLLESEREAR|EGDVLTLLESEREAR|NVKGPVREGDVLTLLESER|TGSQGQCTQVR	VEFMDDTSR	0.6087	0	17.2783	0
Q91W90	Txndc5	Mus musculus	Thioredoxin domain-containing protein 5	2	2	0.0406802	0.731991	83095.7	106001	85498.6	107696	148311	109755	136136	T	3	1	0.272924	-0.450102	46385.9	ALAPTWEQLALGLEHSETVK|GYPTLLLFR		0.06954	0.00289436	8.14504	0.000250351
P97379	G3bp2	Mus musculus	Ras GTPase-activating protein-binding protein 2	24	22	0.0408095	1.52984	11086699	8.21451e+06	10166226	5.21066e+06	5.36536e+06	8470755	6.95656e+06	T	247	1	0.272552	0.61338	54054.8	HVDAHATLSDGVVVQVMGLLSNSGQPERK|IIRYPDSHQLFVGNLPHDIDENELKEFFMSFGNVVELR|IRHVDAHATLSDGVVVQVMGLLSNSGQPERK|GVGGKLPNFGFVVFDDSEPVQR|NSSYVHGGVDASGKPQEAVYGQNDIHHK|LPNFGFVVFDDSEPVQR|FMQTFVLAPEGSVPNK|FMQTFVLAPEGSVPNKFYVHNDMFR|VDAKPEVQSQPPR|HLEELEEK|KFMQTFVLAPEGSVPNK|VLSLNFSECHTK|QYYTLLNKAPEYLHR|LGSGRGTGQMEGR|AFSWASVTSK|ILIAKPIMFRGEVR|ILIAKPIMFR|FYVHNDMFR|QYYTLLNK|NLPPSGTVSSSGIPPHVK|APVSQPR|APEYLHR	VMEKPSPLLVGR|GIVGGGMMR	0.57054	0	28.2085	0
P97452	Bop1	Mus musculus	Ribosome biogenesis protein BOP1	3	3	0.0408254	0.672741	198459	117769	163634	212679	212863	271497	237568	T	6	1	0.271417	-0.571877	82493.6	KLNFLPQKFPSLR|TRDELDQFLDKMDDPDFWR|LTDEQVALVHR		0.05874	0	10.1494	0
Q61749	Eif2b4	Mus musculus	Translation initiation factor eIF-2B subunit delta	8	8	0.0410206	1.15598	1.39688e+06	1.5632e+06	1.32417e+06	1.18143e+06	1.30396e+06	1.16608e+06	1.28415e+06	T	26	1	0.271452	0.209122	57588.2	QDPIRELPGPGSQLGGTAGEKLPAGR|VGTAQLALVAR|IVLAAQAISR|RGDQVALANWQSHPSLR|GADQEIGSAVSAAQR|RVPEHTPADDPTLLRR|VSLFSHLPQYSR|QSSLTQYMSIPSSVIHPAMVR		0.24427	0	18.1216	0
P45376	Akr1b1	Mus musculus	Aldo-keto reductase family 1 member B1	6	6	0.0410261	0.625319	541787	914441	902387	1.11042e+06	1.38007e+06	1.03096e+06	1.41514e+06	T	23	1	0.27043	-0.677335	35709.5	ASHLELNNGTK|TIGVSNFNPLQIER|VAIDLGYR|TTAQVLIR|SPPGQVTEAVK|YKPAVNQIECHPYLTQEK		0.22152	0	13.2417	0
Q61142	Spin1	Mus musculus	Spindlin-1	4	4	0.0415097	0.593343	390954	418763	375431	963689	784386	513100	504592	T	14	1	0.27284	-0.753062	29623.8	VSALEVLPDR|ISDAHLADTMIGK|TSVGPSKPVSQPR|YDGFDCVYGLELNKDER		0.20229	0	11.3202	0
P35980	Rpl18	Mus musculus	Large ribosomal subunit protein eL18	19	19	0.0415921	1.48952	10104146	11410232	11382855	7.13919e+06	5296868	9065491	8514194	T	201	1	0.272328	0.574852	21631.2	TAVVVGTVTDDVR|HFGKAPGTPHSHTKPYVR|GRGTVLLSGPR|ILTFDQLALESPK|RTNSTFNQVVLKR|ILTFDQLALESPKGR|TNRPPLSLSR|TNSTFNQVVLKR|APGTPHSHTKPYVR|TNSTFNQVVLK|GTVLLSGPR|TAVVVGTVTDDVRILEVPKLK|RTNSTFNQVVLK|ILEVPKLK|GTVLLSGPRK|SQDIYLR|MKLPGRENK|TAVVVGTVTDDVRILEVPK|LKVCALR		0.57447	0	15.5455	0
Q9D115	Znf706	Mus musculus	Zinc finger protein 706	5	5	0.04165	0.486192	9608291	10419648	8207349	22435190	32798724	15504941	12072019	T	144	1	0.271886	-1.0404	8492.45	AALIYTCTVCR|TPLPPELADVQA|TFKQHFESK|TQMPDPK|TFKQHFESKHPK		0.55263	0	13.5121	0
Q8CIG8	Prmt5	Mus musculus	Protein arginine N-methyltransferase 5	15	15	0.041711	0.747903	2.82698e+06	3.38759e+06	3379730	4.90712e+06	4.8745e+06	3684545	3.74058e+06	T	104	1	0.271398	-0.419078	72633.6	AAMAVGGAGGSR|CLLDRVPEEEKETNVQVLMVLGAGR|DLNCVPEIADTLGAVAK|QGFDFLCMPVFHPR|AAILPTSIFLTNKK|AAILPTSIFLTNK|GPLVNASLR|IAVALEIGADLPSNHVIDR|EKDRDPEAQFEMPYVVR|DWNTLIVGK|KVWYEWAVTAPVCSSIHNPTGR|LSPWIHPDSK|EFIQEPAK|SDLLLSGR|VPLVAPEDLR		0.30455	0	15.4963	0
Q9D8X2	Ccdc124	Mus musculus	Coiled-coil domain-containing protein 124	15	15	0.0419279	0.527461	4.47801e+06	4.47943e+06	4591655	10947471	13127159	6.4319e+06	5.81369e+06	T	160	1	0.271773	-0.922864	25330.4	AAFTAFEEVQLPR|TVEDAIAVLSVAEEADRHPER|TVEDAIAVLSVAEEADRHPERR|SHLELPLEENLNR|RLQEEGSVEAR|LQEEGSVEAR|SPDNPMNQR|SHLELPLEENLNRR|AKSHLELPLEENLNRR|LLEEEDSRLK|LLEEEDSR|ALPFNAPK|LKQENPNMR|AQIEDSLR|RLEQLER		0.51613	0	15.3001	0
P43276	H1-5	Mus musculus	Histone H1.5	12	8	0.0421671	1.40392	3.70834e+06	2.3484e+06	3.44932e+06	2.22428e+06	2.01087e+06	2.30998e+06	2326483	T	72	1	0.272484	0.489458	22562.4	SETAPAETAAPAPVEK|ALAAGGYDVEKNNSR|ALAAGGYDVEK|ATGPPVSELITK|KALAAGGYDVEKNNSR|GGVSLPALK|KATGPPVSELITK|GGVSLPALKK	SETAPAETAAPAPVEKSPAK|GTGASGSFKLNKK|GTGASGSFKLNK|GTGASGSFK	0.31839	0	18.2459	0
O08583	Alyref	Mus musculus	THO complex subunit 4	17	6	0.0424502	0.518864	8332700	10009189	10238387	22328398	29127978	13170706	13048569	T	245	1	0.272803	-0.946571	26923.6	QQLSAEELDAQLDAYNAR|AGSQGGRGGAVQAAAR|SLGTADVHFERK|PMNIQLVTSQIDTQR|NRPAIARGAAGGGR|AAVHYDR	LLVSNLDFGVSDADIQELFAEFGTLKK|LLVSNLDFGVSDADIQELFAEFGTLK|QLPDKWQHDLFDSGFGGGAGVETGGK|ADKMDMSLDDIIKLNR|ADKMDMSLDDIIK|QYNGVPLDGRPMNIQLVTSQIDTQR|NRGSGGFGGGGTR|SLGTADVHFER|NRPAPYSRPK|MDMSLDDIIK|RPAQSINRGGMTR	0.77255	0	26.2953	0
P46935	Nedd4	Mus musculus	E3 ubiquitin-protein ligase NEDD4	37	35	0.0424633	1.24759	12832869	11614558	12564314	8734354	9034168	11603523	10406020	T	227	1	0.271712	0.319149	102642	RPSPDDDLTDEDNDDMQLQAQR|LAVCGNPATSQPVTSSNHSSR|LTRDDFLGQVDVPLYPLPTENPR|VTLYDPMSGILTSVQTK|LQNVAITGPAVPYSR|DDFLGQVDVPLYPLPTENPR|TQWEDPRLQNVAITGPAVPYSR|WILENDPTELDLR|TGGSEIVVTNK|FIIDEELFGQTHQHELK|GGSLQTCIFEEQPTLPVLLPTSSGLPPGWEEKQDDRGR|LITLHDMESVDSEYYSSLR|KDILGASDPYVR|LWIEFDGEKGLDYGGVAR|DILGASDPYVR|RQISEDVDGPDNR|KQTDIPNKFEMK|KTQWEDPRLQNVAITGPAVPYSR|GKTDSNDLGPLPPGWEER|VAGMAVYHGK|WNEEILFR|EGFFELIPQDLIK|Q…	MERPYTFKDFVLHPR|LLDGFFIRPFYK	0.44419	0	23.5718	0
Q569Z6	Thrap3	Mus musculus	Thyroid hormone receptor-associated protein 3	35	29	0.0426991	0.600548	5.0803e+06	5.31006e+06	5720206	10767869	12561490	6453092	7290192	T	312	1	0.27192	-0.735649	108114	GSESSKPWPDATTYGAGSASR|DSRPSQAAGDNQGDEAKEQTFSGGTSQDIK|SIFQHIQSAQSQR|SPSELFAQHIVTIVHHVK|SPLQSVVVR|YKDDPVDLRLDIER|SREEEWDPEYTPK|SPPATGSAYGSSQKEESAASGGAAYSKR|ASVSDLSPR|DLVHSNKKEQEFR|SPALKSPLQSVVVR|GGFSDADVK|GRKEPEFDDEPK|KHGLTHEELKSPR|YKDDPVDLR|SSFSITR|KEPEFDDEPK|EAQVNVR|KEPEFDDEPKFMSK|MADFHKEELDEHDKDK|NQEEEKSGKWESLHTGK|EKGGFSDADVK|RIDISPSTFRK|SGKWESLHTGK|SDPFAPK|YYLHDDR|IDISPSTFR|GFVPEKNFR|HGLTHEELKS…	KAEEMEDEPFTER|ERSPALKSPLQSVVVR|MDSFDEDLARPSGLLAQER|EHHFGSSGMTLHER|EEEWDPEYTPK|MKSDPFAPK	0.36067	0	21.3914	0
Q6ZWY3	Rps27l	Mus musculus	Small ribosomal subunit protein eS27-like	5	2	0.0427067	1.64893	1.23391e+06	1.34264e+06	1.53486e+06	796191	559476	1139802	924653	T	62	1	0.271063	0.721529	9470.87	DLLHPSLEEEKKK|DLLHPSLEEEK	LVQSPNSYFMDVK|LTEGCSFR|ARLTEGCSFR	0.42857	0	15.2059	0
Q8BXZ1	Tmx3	Mus musculus	Protein disulfide-isomerase TMX3	3	3	0.042836	1.36254	161600	186307	180875	99531.9	145340	148517	129383	T	3	1	0.271194	0.446299	51815	TKDDIIEFAHR|KLEPIWNEVGLEMK|LLKGDLAYNYR		0.07895	0	10.0683	0
Q9DBY8	Nvl	Mus musculus	Nuclear valosin-containing protein-like	2	2	0.0434507	1.39497	162677	142868	140268	135584	93028	88065.9	114922	T	4	1	0.274488	0.480237	94417	TLLAHAIAGELDLPILK|TGSVPLKTPAR		0.03275	0	9.1025	0
Q9D823	Rpl37	Mus musculus	Large ribosomal subunit protein eL37	3	3	0.0434509	1.72206	409221	371434	402537	167580	187352	359801	242693	T	20	1	0.273412	0.784135	11070.9	KYNWSAK|TKGTSSFGK|RAAVAASSSS		0.26804	0	11.3302	0
Q8K194	Snrnp27	Mus musculus	U4/U6.U5 small nuclear ribonucleoprotein 27 kDa protein	10	9	0.0435778	0.499481	2.21672e+06	2.77091e+06	1.91978e+06	6232010	6.37411e+06	2.68506e+06	4.04298e+06	T	104	1	0.27325	-1.0015	18873.9	KVDGSVNAYAINVSQK|KVDGSVNAYAINVSQKR|QITEEDLEGKTEEEIEMMK|GKKVDGSVNAYAINVSQK|VDGSVNAYAINVSQK|VDGSVNAYAINVSQKR|LMGFASFDSTKGK|GGFNRPLDFIA|KGGFNRPLDFIA	LMGFASFDSTK	0.39355	0	18.3118	0
Q62426	Cstb	Mus musculus	Cystatin-B	4	4	0.043632	0.536663	365467	407041	452081	909942	1.18934e+06	563555	540595	T	16	1	0.272296	-0.897912	11038.5	QIVAGTNLFIK|VFQPLPHENKPLTLSSYQTNK|VDVGGDKCVHLR|SQLESKENQKFDVFK		0.60204	0.000503778	10.0336	5.37324e-05
Q922X9	Prmt7	Mus musculus	Protein arginine N-methyltransferase 7	9	9	0.0438236	1.40082	2202961	1.63352e+06	1.55939e+06	1.14908e+06	1088206	1.45125e+06	1.42705e+06	T	33	1	0.272543	0.486276	78250.7	HLVQEDCEAVPHR|SLSKPQEILTFDFQQPIPQQPMQSK|HSTEVTVGPDGDLPCR|FGEINDQDRTDHYAQALR|ATVYAQLVESR|SSYADMLHDKDR|GTMELTRPGK|TSPDENDSAYQVRPVCDCQAHLLWNRPR|ANILITELFDTELIGEGALPSYEHAHKHLVQEDCEAVPHR		0.23121	0	15.3576	0
Q9DBF7	Cwc25	Mus musculus	Pre-mRNA-splicing factor CWC25 homolog	6	6	0.0438763	0.572697	485008	466407	557075	937226	1.38216e+06	649243	698329	T	31	1	0.271815	-0.804157	48781.5	IREDPLFIIR|VPGYGLQVR|YAEDVGAVK|GLQGSLGEQR|EVLNNPVK|MKLESASTSSLEDR		0.14423	0	12.4371	0
Q14C51	Ptcd3	Mus musculus	Small ribosomal subunit protein mS39	4	4	0.0439318	1.46812	309760	291565	306913	175038	160777	257990	248714	T	7	1	0.271138	0.553967	77746.8	FIINSYPK|IFALMPEK|NELLEEFMDTAK|LASAFSLPIGESLAQR		0.06423	0.00289436	8.23183	0.000301882
O35143	Atp5if1	Mus musculus	ATPase inhibitor, mitochondrial	3	3	0.0440301	0.62018	257683	399238	327182	534994	719668	407131	468659	T	19	1	0.270713	-0.689242	12151.2	KHHEDEIDHHSKEIER|HHEDEIDHHSKEIER|TKEQLAALRK		0.23585	0	9.26908	0
Q6IRU2	Tpm4	Mus musculus	Tropomyosin alpha-4 chain	13	12	0.0441445	0.747831	1.72083e+06	1.58422e+06	1.59955e+06	2169345	2.82165e+06	1.96434e+06	1.8944e+06	T	81	1	0.27087	-0.419216	28450.4	AGLNSLEAVKR|KLVILEGELK|KIQALQQQADDAEDRAQGLQR|KLVILEGELKR|AGLNSLEAVK|IQALQQQADDAEDRAQGLQR|HITDEADRKYEEVAR|AEVSELKCGDLEEELKNVTNNLK|CGDLEEELKNVTNNLK|TIDDLEEK|EKAEGDAAALNR|EKAEGDAAALNRR	EAETRAEFAER	0.45565	0	16.2564	0
Q9R0P5	Dstn	Mus musculus	Destrin	11	8	0.0441963	0.67661	2098020	1.96896e+06	1867810	3.39249e+06	3.78388e+06	2.28669e+06	2478306	T	145	1	0.269886	-0.563603	18509.5	ASGVQVADEVCR|KFPGIKHEYQANGPEDLNR|HFVGMLPEKDCR|ESRKEELMFFLWAPEQAPLK|KAVIFCLSADKK|HEYQANGPEDLNR|YALYDASFETK|AVIFCLSADKK	MIYASSKDAIK|MIYASSK|MIYASSKDAIKK	0.59394	0	14.2007	0
Q8R3C0	Mcmbp	Mus musculus	Mini-chromosome maintenance complex-binding protein	4	4	0.0443664	1.21301	567907	528849	503496	374251	471111	477369	442129	T	14	1	0.270742	0.278586	72844.8	LQHINPLLPTCLNKEESR|KDDPQSITADDLHQLLVVAR|EAYVNANQAR|VSPSTSYTPSR		0.0919	0	15.1066	0
P61255	Rpl26	Mus musculus	Large ribosomal subunit protein uL24	19	16	0.0443984	1.47849	9051324	8.19389e+06	8934761	4.82135e+06	4822275	7888480	6592095	T	159	1	0.269887	0.564127	17247.5	KDDEVQVVR|HFNAPSHIR|ANGTTVHVGIHPSKVVITR|KRHFNAPSHIR|FNPFVTSDR|KKYVIYIER|KIMSSPLSK|HFNAPSHIRR|GKYKEETIEK|YKEETIEK|DDEVQVVR|ANGTTVHVGIHPSK|EKANGTTVHVGIHPSK|KFNPFVTSDR|YVIYIER|KYVIYIER	MKFNPFVTSDR|SMPIRKDDEVQVVR|IMSSPLSK	0.5931	0	13.5243	0
Q9QXA5	Lsm4	Mus musculus	U6 snRNA-associated Sm-like protein LSm4	8	6	0.0446562	0.565335	1.21878e+06	1.32052e+06	1.04382e+06	2.41863e+06	3.20745e+06	1693477	1.48819e+06	T	41	1	0.271188	-0.822822	15066.7	IPDEIIDMVREEAAK|IPDEIIDMVR|NGETYNGHLVSCDNWMNINLR|TAQNHPMLVELK|EVICTSR|DGDKFWR	MLPLSLLK|MPECYIR	0.56204	0	15.1755	0
P19253	Rpl13a	Mus musculus	Large ribosomal subunit protein uL13	19	16	0.0447328	1.36917	10517804	10256636	12587108	7904035	6368204	9545731	8905126	T	216	1	0.270442	0.453299	23449.3	AEGQVLVLDGRGHLLGR|CEGINISGNFYR|LKVLDGIPPPYDKK|YQAVTATLEEKRK|LAHEVGWK|YQAVTATLEEK|VLDGIPPPYDK|LKVLDGIPPPYDK|VLDGIPPPYDKK|RMNTNPSRGPYHFR|FTEVLKTNGLLV|KFAYLGR|RGQAALER|YLAFLRK|RMVVPAALK|MNTNPSR	AEGQVLVLDGR|MVVPAALK|MNTNPSRGPYHFR	0.59606	0	19.2001	0
Q922R8	Pdia6	Mus musculus	Protein disulfide-isomerase A6	7	7	0.0454799	0.653118	1.10453e+06	1.57446e+06	1.36397e+06	1.84469e+06	2.69238e+06	1.5827e+06	2.21169e+06	T	50	1	0.274687	-0.614584	48070.3	TGEAIVDAALSALR|VGAVNADKHQSLGGQYGVQGFPTIK|GSFSEQGINEFLR|NLEPEWAAAATEVKEQTK|AATALKDVVK|IFQKGESPVDYDGGR|KAATALKDVVK		0.21818	0	19.3128	0
P13646	KRT13	Homo sapiens	Keratin, type I cytoskeletal 13	16	3	0.0457403	0.0575288	50742.4	929879	24006.4	3306011	4.77303e+06	827991	825088	C	117	1	0.275613	-4.11957	49557.4	SAELNKEVSTNTAMIQTSK|ILTATIENNR|EQYEAMAER	QSVEADINGLR|ALEEANADLEVK|TRLEQEIATYR|NHEEEMKEFSNQVVGQVNVEMDATPGIDLTR|LEQEIATYR|QSVEADINGLRR|VLDELTLSK|LAADDFR|VILEIDNAR|LASYLEK|SLLEGQDAK|YENELALR|LKYENELALR	0.33843	0	15.3278	0
P62918	Rpl8	Mus musculus	Large ribosomal subunit protein uL2	25	22	0.045788	1.46679	27910090	18951816	19976554	13879349	12242144	18295950	16113481	T	303	1	0.275259	0.552663	28007.3	AQLNIGNVLPVGTMPEGTIVCCLEEKPGDR|KAQLNIGNVLPVGTMPEGTIVCCLEEKPGDR|GIVKDIIHDPGRGAPLAK|RTELFIAAEGIHTGQFVYCGKK|AQLNIGNVLPVGTMPEGTIVCCLEEKPGDRGK|KRTELFIAAEGIHTGQFVYCGK|ASGNYATVISHNPETK|AVVGVVAGGGRIDKPILK|GIVKDIIHDPGR|RTELFIAAEGIHTGQFVYCGK|LRAVDFAER|AVVGVVAGGGR|ASGNYATVISHNPETKK|TELFIAAEGIHTGQFVYCGK|KVGLIAAR|DIIHDPGR|VVFRDPYR|DIIHDPGRGAPLAK|VKLPSGSK|KGAGSVFR|IDKPILK|AVDFAER	VRGVAMNPVEHPFGGGNHQHIGKPSTIR|GVAMNPVEHPFGGGNHQHIGKPSTIR|GVAMNPVEHPFGGGNHQHIGKPSTIRR	0.69261	0	22.2885	0
Q9CWJ9	Atic	Mus musculus	Bifunctional purine biosynthesis protein ATIC	22	22	0.0458499	1.11968	6679614	7.44643e+06	6.8822e+06	5.98216e+06	5973532	6716283	6348072	T	125	1	0.27445	0.163086	64177.1	APSQLALFSVSDKTGLVEFAR|HVSPAGAAVGVPLSEDEAR|TLHPAVHAGILAR|DVSELTGFPEMLGGR|DGQVIGIGAGQQSR|AFTHTAQYDEAISDYFR|AFTHTAQYDEAISDYFRK|SLASLGLSLVASGGTAK|EVSDGIVAPGYEEEALKILSK|VTVVCEPEDYAGVAAEMHGSDSKDTSLETRR|MSSFGDFVALSDICDVPTAK|EVSDGIVAPGYEEEALK|GAVDIPAAASFK|YGMNPHQTPAQLYTLKPK|VVVCNLYPFVK|NIPEDAADMAR|YTQSNSVCYAK|LDFNLVR|EWVDKLSGVSVSSDAFFPFRDNVDR|LAGDKANSWWLR|SLFSNIVTK|GISQMPLR		0.52872	0	25.2152	0
Q9CR02	Tma16	Mus musculus	Translation machinery-associated protein 16	6	6	0.0458598	0.630394	1.90652e+06	1.62154e+06	2.06154e+06	3809494	3.66557e+06	2.37508e+06	2256047	T	40	1	0.273441	-0.665674	25766.4	YLDRFSSELEQIELQNSIKDR|FSSELEQIELQNSIKDR|DACELVER|KLCADDAVPK|YSKKDACELVER|NILNIEK		0.22624	0	19.2504	0
Q8CGC7	Eprs1	Mus musculus	Bifunctional glutamate/proline--tRNA ligase	79	79	0.0460419	1.19319	24441758	22609558	20416492	18111696	17293378	21137670	18857242	T	420	1	0.273963	0.25482	169972	EVVPVNVLDAQEEMKEVAR|ERPAPAVSSTCATAEDSSVLYSR|SQGSGLSSGGAGEGQGPK|TGQEYKPGNPSAAAVQTVSTK|SGKTELAEPIAIRPTSETVMYPAYAK|KLTWFVNEGLVDGWDDPRFPTVR|VLEDIQLNLFTR|KEENLAEWYSQVITK|KAPKEDIDAAVK|RGFFICDQPYEPVSPYSCR|WFGFLEAQQAFR|ASKDQVDSAVQELLQLK|VAQIPFCGEIDCEDWIKK|TGKDYVPGQPPASQNSHSNPVSNAQPAGAEKPEAK|SVVNMEWDKIWAFNKK|DQDVEPGAPSMGAK|NHIEDFAPEVAWVTR|THMVVSNTLEDFQK|AKIDMSSNNGCMRDPTLYR|VTEAVECLLSLK|DTGEKLTIAEKEAEAK|EA…		0.52976	0	22.233	0
P62281	Rps11	Mus musculus	Small ribosomal subunit protein uS17	23	21	0.0462792	1.26103	16291702	14506915	15859650	11169204	10736596	14392352	13340978	T	232	1	0.274117	0.334606	18419	DVQIGDIVTVGECRPLSK|AYQKQPTIFQNK|CPFTGNVSIR|TPKEAIEGTYIDKK|RVLLGETGKEK|VLLGETGKEKLPR|EAIEGTYIDKK|KCPFTGNVSIR|VLLGETGKEK|QPTIFQNK|EAIEGTYIDK|ADIQTER|RDYLHYIR|DYLHYIR|FNVLKVTK|YYKNIGLGFK|YYKNIGLGFKTPK|AYQKQPTIFQNKK|VLLGETGK|ILSGVVTK|NIGLGFKTPK	NMSVHLSPCFR|HKNMSVHLSPCFR	0.77848	0	18.4276	0
Q61792	Lasp1	Mus musculus	LIM and SH3 domain protein 1	1	1	0.0465848	0.616122	109891	123814	124193	188485	297143	145296	171637	T	8	1	0.27408	-0.698713	29975.3	LKQQSELQSQVR		0.04563	0.000503778	9.13208	4.14662e-05
P07758|Q00896	Serpina1a|Serpina1c	Mus musculus	Alpha-1-antitrypsin 1-1|Alpha-1-antitrypsin 1-3	7	0	0.0467303	0.497432	488162	623166	736720	1.64936e+06	1.83568e+06	928375	791023	T	15	2	0.273609	-1.00743	45973.50992957693|45794.44360640655		EDVQETDTSQKDQSPASHEIATNLGDFAISLYR|VINDFVEKGTQGK|TLMSPLGITR|VINDFVEK|LSISGEYNLK|RLAQIHFPR|IFNNGADLSGITEENAPLKLSQAVHK	0.24455|0.24515	0	9.43103	0
P62838	Ube2d2	Mus musculus	Ubiquitin-conjugating enzyme E2 D2	3	1	0.0468509	0.662956	28051.2	42506.8	51540.3	59566.2	65359.4	59309.9	54371.2	T	17	1	0.273285	-0.593016	16724.4	IHKELNDLAR	IYHPNINSNGSICLDILR|SQWSPALTISK	0.26531	0	14.3706	0
P12787	Cox5a	Mus musculus	Cytochrome c oxidase subunit 5A, mitochondrial	5	5	0.0472331	0.674315	635961	875138	886353	1.15562e+06	1.49563e+06	911150	1.19713e+06	T	24	1	0.274662	-0.568505	16091.3	SHGSHETDEEFDAR|LNDFASAVR|RLNDFASAVR|ILEVVKDK|IIDAALR		0.26712	0	14.3232	0
Q9D1D4	Tmed10	Mus musculus	Transmembrane emp24 domain-containing protein 10	4	4	0.0472943	0.640021	334285	431824	390844	614636	792471	415797	636762	T	10	1	0.273677	-0.643809	24894.9	IPDQLVILDMK|RLEDLSESIVNDFAYMK|ISFHLPVNSR|NYEEIAKVEK		0.21918	0	14.176	0
P19426	Nelfe	Mus musculus	Negative elongation factor E	7	7	0.0474484	0.564094	922826	698072	965850	1.91231e+06	2.03694e+06	1.39066e+06	968449	T	36	1	0.273743	-0.825993	42528.5	KGNTLYVYGEDMTPTLLR|SLSEQPVVDTATATEQAK|KQPMLDAATGK|SGAISAIKAETK|NCAFVTYEK|LKDPEKGPVPTFQPFQR|SVWGSLAVQNSPK		0.26133	0	14.3017	0
Q8C0E2	Vps26b	Mus musculus	Vacuolar protein sorting-associated protein 26B	1	1	0.0481291	1.52471	67203.3	43747.7	51105.1	27503.7	41167.5	31130.1	41931.5	T	3	1	0.276484	0.608534	39100.2	SMSHQAAIASQR		0.03571	0.00335731	8.10169	0.000312806
Q9D1N9	Mrpl21	Mus musculus	Large ribosomal subunit protein bL21m	3	3	0.0483609	1.40893	430772	634245	420588	393167	295414	358899	340105	T	13	1	0.276908	0.494598	23351.7	IIVNPQTILR|INTIEIAPR|VLLVGADNFTLLGKPLLRK		0.18182	0	11.234	0
Q9D824	Fip1l1	Mus musculus	Pre-mRNA 3'-end-processing factor FIP1	10	10	0.0484749	0.534829	1.1693e+06	1050220	1.81466e+06	3257169	3247224	1.77717e+06	1.89262e+06	T	48	1	0.276792	-0.902851	64920	RLPGAIDVIGQTITISR|ANENSNIQVLSDR|TGAPQYGSYGTAPVNLNIK|RANENSNIQVLSDR|KPGADLSDYFNYGFNEDTWK|MGLEVIPVTSTTNK|AEFTSPPSLFK|RRANENSNIQVLSDR|LVELSGGTGGDEEEEWLYGGPWDVHVHSDLAK|QWDYYAR		0.23236	0	19.3989	0
P46460	Nsf	Mus musculus	Vesicle-fusing ATPase	16	16	0.0485513	1.15342	2818210	2.53807e+06	2.97195e+06	2.34362e+06	2.26368e+06	2.63832e+06	2.3771e+06	T	55	1	0.276225	0.205917	82561	NFSGAELEGLVR|VLDDGELLVQQTK|NSDRTPLVSVLLEGPPHSGK|GILLYGPPGCGK|IAEESNFPFIK|MGIGGLDKEFSDIFR|VVNGPEILNK|AENSSLNLIGK|QSIINPDWNFEK|MEIGLPDEKGR|GSMAGSTGVHDTVVNQLLSK|YVGESEANIR|KLFADAEEEQRR|TTIAQQVK|WGDPVTR|LQILHIHTAR		0.26075	0	13.3001	0
P61358	Rpl27	Mus musculus	Large ribosomal subunit protein eL27	11	11	0.0488104	1.54615	21384546	17283276	23588104	10382727	11113481	17400824	15636855	T	148	1	0.276884	0.628684	15787.7	VYNYNHLMPTR|NIDDGTSDRPYSHALVAGIDRYPR|NIDDGTSDRPYSHALVAGIDR|TVVNKDVFRDPALK|YSVDIPLDKTVVNK|DVFRDPALK|YSVDIPLDK|VVLVLAGR|DVFRDPALKR|KVTAAMGK|NKWFFQK		0.60294	0	16.2811	0
Q9Z2U1	Psma5	Mus musculus	Proteasome subunit alpha type-5	4	4	0.0488755	0.790868	791489	849917	927864	1.16143e+06	1.05764e+06	898433	1.2355e+06	T	25	1	0.275972	-0.338492	26394.2	AIGSASEGAQSSLQEVYHK|LFQVEYAIEAIK|GVNTFSPEGR|SSLIILK		0.19917	0	16.1406	0
P52479	Usp10	Mus musculus	Ubiquitin carboxyl-terminal hydrolase 10	16	16	0.0489188	1.39828	3.11099e+06	3.81416e+06	3.92158e+06	2.28577e+06	2153554	3.31621e+06	2682042	T	73	1	0.275526	0.483657	86967.7	QADFVQTPITGIFGGHIR|IAELLETVTLIHKPVSLQPR|SWASLFHDSKPSASSPMAYVETK|TVQDALESLVAR|NIDYPVDLEISR|DIRPGAAFEPTYIYR|TCDSPQNPVDFISGPVPDSPFPR|EGLVPVSEDPVAIK|TAGLCEGCHEADFEQPCLPADSLLR|VQRPCTSTPMIDSFVR|KIPEAVEKDETYSSIDQYPASALALESNSNAEAETLENDSGAGGLGQR|ESVQGYTTK|TAYLLYYR|CSPPVPSPLASEK|ELLSPGIK|FIPLYSK		0.34217	0	17.2407	0
P0C0S6|Q3THW5	H2az1|H2az2	Mus musculus	Histone H2A.Z|Histone H2A.V	6	0	0.0489189	0.635609	2169649	1.7229e+06	2.39688e+06	4.32246e+06	3.7872e+06	2427132	2.86962e+06	T	70	2	0.274569	-0.653787	13544.552032024458|13500.525817275968		VGATAAVYSAAILEYLTAEVLELAGNASK|HLQLAIRGDEELDSLIK|AGLQFPVGR|HLQLAIR|ATIAGGGVIPHIHK|GDEELDSLIK	0.53906|0.53906	0	24.334	0
P56480	Atp5f1b	Mus musculus	ATP synthase subunit beta, mitochondrial	23	17	0.0490611	0.669929	9295997	12948141	14157714	16268392	23166858	14976596	17902864	T	268	1	0.275045	-0.57792	56265.5	KGSITSVQAIYVPADDLTDPAPATTFAHLDATTVLSR|SLQDIIAILGMDELSEEDKLTVSR|LVLEVAQHLGESTVR|AIAELGIYPAVDPLDSTSR|VLDSGAPIKIPVGPETLGR|IPSAVGYQPTLATDMGTMQER|IGLFGGAGVGK|FTQAGSEVSALLGR|VALTGLTVAEYFR|AHGGYSVFAGVGER|VVDLLAPYAK|VALTGLTVAEYFRDQEGQDVLLFIDNIFR|IMNVIGEPIDER|VALVYGQMNEPPGAR|EGNDLYHEMIESGVINLK|TREGNDLYHEMIESGVINLKDATSK|LVPLKETIK	FLSQPFQVAEVFTGHMGK|IMDPNIVGNEHYDVAR|TVLIMELINNVAK|TREGNDLYHEMIESGVINLK|IMNVIGEPIDERGPIK|TIAMDGTEGLVR	0.63705	0	23.2112	0
Q9DB15	Mrpl12	Mus musculus	Large ribosomal subunit protein bL12m	4	4	0.0492142	1.62767	971320	975950	713656	520518	367196	692284	639470	T	10	1	0.275324	0.702809	21694.8	IQQLVQDIASLTLLEISDLNELLKK|KLVESLPQEIK|NYVQGINLVQAK|SEALAGAPLDNAPK		0.30846	0	17.3188	0
O55142	Rpl35a	Mus musculus	Large ribosomal subunit protein eL33	15	13	0.0494112	1.43391	6.8185e+06	7954595	6.5624e+06	4861573	3.64999e+06	6037422	5569457	T	131	1	0.275959	0.519959	12545.7	DETEFYLGKR|IEGVYARDETEFYLGKR|EHTALLKIEGVYAR|NNTVTPGGKPNKTR|AIFAGYKR|NNTVTPGGKPNK|DETEFYLGK|EHTALLK|AIFAGYK|IEGVYAR|FRSNLPAK|VMLYPSR|RCAYVYK	IRVMLYPSRI|VMLYPSRI	0.63636	0	12.3936	0
Q8R3L2	Tcf25	Mus musculus	Ribosome quality control complex subunit TCF25	1	1	0.049438	1.64573	196772	128421	145254	75365.5	78486.1	136954	95277.8	T	8	1	0.275096	0.718728	76636.7	HLNPDTELKR		0.01479	0	11.2198	0
Q3UEB3	Puf60	Mus musculus	Poly(U)-binding-splicing factor PUF60	14	14	0.049797	0.544757	2.90734e+06	3033181	3.27175e+06	6653464	9090334	4.26453e+06	3895753	T	111	1	0.276055	-0.876316	60210.8	VGRPSNIGQAQPIIDQLAEEAR|IYVASVHQDLSDDDIKSVFEAFGK|AQSSQDAVSSMNLFDLGGQYLR|QAFAPFGPIK|KQESTVMVLR|SIDMSWDSVTMK|IFVEFSMASETHK|LGLPPLTPEQQEALQK|YAMEQSIK|GYGFIEYEK|NMVDPKDIDDDLEGEVTEECGK|VVAEVYDQER|ALAIMCR|VIIYQEK		0.34043	0	20.2329	0
Q8K1J5	Sde2	Mus musculus	Splicing regulator SDE2	2	2	0.0497979	0.73268	436437	309709	414352	514044	598041	434254	557007	T	8	1	0.275116	-0.448744	48549.8	GPGTVWKALPCASVGCSVR|AAMVLSGEDRK		0.06696	0.00827586	8.04605	0.000700327
P68510	Ywhah	Mus musculus	14-3-3 protein eta	11	7	0.0499823	1.16655	2624495	2658706	2.64302e+06	2.06789e+06	2111326	2.57418e+06	2.34114e+06	T	87	1	0.275485	0.222242	28194	AVTELNEPLSNEDRNLLSVAYK|GDREQLLQR|NSVVEASEAAYKEAFEISK|YLAEVASGEKK|YLAEVASGEK|LAEQAERYDDMASAMK|YDDMASAMK	DSTLIMQLLR|NLLSVAYK|MKGDYYR|EHMQPTHPIR	0.42276	0	17.2191	0
P70195	Psmb7	Mus musculus	Proteasome subunit beta type-7	2	2	0.0502618	0.682297	208327	225905	258371	349232	429838	244050	352176	T	6	1	0.276257	-0.551527	29872.3	GTTAVLTEK|ATEGMVVADKNCSK		0.08303	0.00827586	8.12498	0.000715741
P33609	Pola1	Mus musculus	DNA polymerase alpha catalytic subunit	4	4	0.0504147	0.80715	438413	436122	372211	567587	437674	502466	556672	T	5	1	0.275865	-0.309091	167233	NYAFEIPDVPEKSEYLEVR|STGALLNPFSVHTPK|LDNLAIDTQYYLAQQIHPVVAR|VWIESVK		0.043	0	10.0869	0
Q9DB05	Napa	Mus musculus	Alpha-soluble NSF attachment protein	2	2	0.0507128	0.825436	120686	122269	114055	150965	149839	120272	158506	T	7	1	0.275906	-0.276771	33168.2	TIQGDEEDLR|QAEAMALLAEAER		0.07797	0	10.2749	0
Q9Z1Z2	Strap	Mus musculus	Serine-threonine kinase receptor-associated protein	9	9	0.0507798	1.2396	1.69933e+06	1.4923e+06	1.29246e+06	1101000	1193472	1.15992e+06	1.35282e+06	T	26	1	0.275465	0.309879	38418	AATAAADFTAK|VWDAVSGDELMTLAHK|CVLPEEDSGELAKPK|GAVWGATLNKDATK|GHFGPIHCVR|IYDLNKPEAEPK|LWQTVVGK|ALWCSDDKQILSADDKTVR|LWDHATMTEVK		0.33143	0	12.1633	0
Q9DAW6	Prpf4	Mus musculus	U4/U6 small nuclear ribonucleoprotein Prp4	9	9	0.0517128	1.21982	1.47372e+06	1.39499e+06	1.69666e+06	1.25316e+06	1.13265e+06	1.43228e+06	1.17524e+06	T	39	1	0.281693	0.286667	58333.3	LHKEIPETTR|TKAPDDLVAPVVK|LWIANYSLPR|SKEEYQQTWYHEGPNSLK|GHNTNVGAIVFHPK|ALGEPITLFGEGPAERR|LWSLDSDEPVADIEGHTVR|NILSVVGTDALKK|IWTHPGWSPLK		0.23992	0	12.1947	0
F7BJB9	Morc3	Mus musculus	MORC family CW-type zinc finger protein 3	8	8	0.0518517	0.622128	944349	640991	660185	1498654	1.46338e+06	898450	997232	T	22	1	0.281555	-0.684717	106455	VQETSAESVDATSHQLQELR|SHIHSQCEELQTEVEQLK|LGVHSSILNAK|KLGVHSSILNAK|SELLVVTQERDDYKR|IPEDLDETAGR|NCEVPEEPEDEDLVHPTYEK|IIIWNLR		0.10934	0	11.2774	0
P80316	Cct5	Mus musculus	T-complex protein 1 subunit epsilon	33	32	0.0523077	1.04876	13191513	13182099	13712282	12506376	12829578	13172917	12458123	T	276	1	0.283523	0.0686865	59585.9	AFADALEVIPMALSENSGMNPIQTMTEVR|SQDDEIGDGTTGVVVLAGALLEEAEQLLDR|WVGGPEIELIAIATGGR|VLVDINNPEPLIQTAK|LGFAGVVQEISFGTTKDK|ETGANLAICQWGFDDEANHLLLQNGLPAVR|ISDKVLVDINNPEPLIQTAK|IAIQHLDKISDKVLVDINNPEPLIQTAK|IAILTCPFEPPKPK|ASVGTLAFDEYGRPFLIIKDQDR|DVDFELIKVEGK|GSNDMQYQHVIETLIGK|LGFAGVVQEISFGTTK|IADGYEQAAR|KQQISLATQMVR|GSNDMQYQHVIETLIGKK|HKLDVMSVEDYK|QVKESNPALGIDCLHK|QQISLATQMVR|GVIVDKDFSHPQMPK|TSLGPNGLDK|IAIQ…	MMVDKDGDVTITNDGATILSMMDVDHQIAK	0.68577	0	22.3244	0
Q99P72	Rtn4	Mus musculus	Reticulon-4	7	7	0.0523891	0.829039	926373	778985	928731	1.0971e+06	1.03805e+06	934380	1.16677e+06	T	19	1	0.28305	-0.270488	126535	SKDKEDLVCSAALHNPQESPATLTK|EAEEKLPSDTEKEDR|GPLPAAPPTAPERQPSWER|GPLPAAPPTAPER|YSNSALGHVNSTIK|VVKEDGVMSPEK|ATNPFVNR		0.08003	0	14.101	0
Q9JM93	Arl6ip4	Mus musculus	ADP-ribosylation factor-like protein 6-interacting protein 4	6	6	0.0524741	0.574983	1.06513e+06	1.39933e+06	820865	2.14698e+06	2.46095e+06	1.2339e+06	1.83637e+06	T	58	1	0.283013	-0.798408	25509.5	AVAVHQAEALPGPSLDQWHR|LIKGDGEVLEEIVTK|SAGEDNDGPVLTDEQK|IQAMKPMTKEEWDAR|LIKGDGEVLEEIVTKER|GDGLAFQMR		0.33624	0	17.1924	0
Q9Z2X1	Hnrnpf	Mus musculus	Heterogeneous nuclear ribonucleoprotein F	18	14	0.0528078	1.21271	12994615	10313460	11552398	10099619	8.38238e+06	10075506	9708567	T	160	1	0.284538	0.278233	45700.9	ITGEAFVQFASQELAEK|SGAYSAGYGGYEEYSGLSDGYGFTTDLFGR|HSGPNSADSANDGFVR|YGDSEFTVQSTTGHCVHMR|GLPYKATENDIYNFFSPLNPVR|SHRTEMDWVLK|QSGEAFVELESEDDVKLALKK|DLSYCLSGMYDHR|YIEVFKSSQEEVR|TEMDWVLK|RYIGIVK|GLPFGCTK|SSQEEVR|SYSDPPLK	ATENDIYNFFSPLNPVR|VHIEIGPDGR|MLGPEGGEGYVVK|FMSVQRPGPYDRPGTAR	0.54217	0	20.3889	0
Q7TQK4	Exosc3	Mus musculus	Exosome complex component RRP40	2	2	0.0531881	1.57445	228219	315820	301039	183988	184224	235818	123214	T	7	1	0.286196	0.654847	29527.4	YVPVKGDHVIGIVIAK|HKEPSGGGGGVYWVDSQQKR		0.13139	0	13.1048	0
Q9D384	Snrnp35	Mus musculus	U11/U12 small nuclear ribonucleoprotein 35 kDa protein	3	3	0.0532629	0.561649	132558	137302	157622	291935	397022	165334	213768	T	4	1	0.285368	-0.83226	29272.2	YVPNKGVTGDPLLTLFVAR|EYDPLKAGSIDGTDEDPHDR|DLVTGFSK		0.19262	0.00196464	8.20833	0.000101847
Q8CEZ0	Kctd2	Mus musculus	BTB/POZ domain-containing protein KCTD2	2	1	0.0533317	0.576784	188011	231428	134361	392760	372615	205527	316362	T	5	1	0.284961	-0.793897	30126.3	ELNNSTNGIVIEPSEK	VLQCQEEELTQMVSTMSDGWK	0.1391	0	17.1802	0
Q91X72	Hpx	Mus musculus	Hemopexin	5	5	0.0535376	0.49913	269354	293689	437125	944484	900539	399508	534166	T	17	1	0.28523	-1.00251	51285.2	CSPDPGLTALLSDHR|GGNNLVSGYPK|DYFVSCPGR|ELGSPPGISLETIDAAFSCPGSSR|GATYAFTGSHYWR		0.15652	0	14.2999	0
Q3THK3	Gtf2f1	Mus musculus	General transcription factor IIF subunit 1	7	5	0.053587	0.559118	636821	584637	490255	1.53144e+06	1.24382e+06	829178	670781	T	21	1	0.284581	-0.838775	57206.5	TGLSSEQTVNVLAQILKR|KTGLSSEQTVNVLAQILKR|STPSSGDVQVTEDAVRR|GTSRPGTPSAEAASTSSTLR|KTGLSSEQTVNVLAQILK	MDTGPQSLSGK|LRMDTGPQSLSGK	0.13583	0	16.3793	0
Q9D7S7	Rpl22l1	Mus musculus	Ribosomal protein eL22-like 1	8	6	0.0537223	0.699558	5030944	6354613	6.42064e+06	9563049	10629103	7286964	6.82583e+06	T	120	1	0.284514	-0.515485	14458.6	FHLDLTHPVEDGIFDSGNFEQFLR|TGNLGNVVHIER|VVASDKETYELR|FHLDLTHPVEDGIFDSGNFEQFLREK|NKITVVSEK|ITVVSEK	NNLRDWLR|KNNLRDWLR	0.55738	0	27.3522	0
O09167	Rpl21	Mus musculus	Large ribosomal subunit protein eL21	18	15	0.054086	1.37511	7908017	6196281	6711579	4.79129e+06	3.931e+06	6.04547e+06	5.57566e+06	T	156	1	0.285949	0.459547	18567.1	VYNVTQHAVGIIVNK|VYNVTQHAVGIIVNKQVK|KGDIVDIK|KHGVVPLATYMR|IYKKGDIVDIK|EKGTWVQLK|RQPAPPREAHFVR|RQPAPPR|SRDSFLKR|EKGTWVQLKR|SRDSFLK|GTWVQLK|GDIVDIK|GTWVQLKR|YMFSRPFR	KGDIVDIKGMGTVQK|TNGKEPELLEPIPYEFMA|HGVVPLATYMR	0.65	0	20.4052	0
P37913	Lig1	Mus musculus	DNA ligase 1	31	31	0.0542499	1.21754	5917347	6384204	6311068	5508101	4.42581e+06	5832131	4731857	T	168	1	0.286607	0.283965	102226	KVAQVLSCEGEDEDEAPGTPK|RTIQDTLEEQNEDKTK|IKHPSVTSFILDTEAVAWDREK|DKQPEQATTSNQVASLYR|DKQPEQATTSNQVASLYRK|LGPPQQGLELGVGDGVLLK|KQIQPFQVLTTR|IDGAVAPDHWLDPSIVWEVK|AQIHVLEGGEVK|IKHPSVTSFILDTEAVAWDR|TIQDTLEEQNEDKTK|KMWLEEQGMILK|HGQKVPFLAVAR|LGTGFSDEELEEHHQSLQALVLPTPRPYVR|TEVKQEESGTLR|QIQPFQVLTTR|SVVALSPPDLLPVLYLSLNR|NQVVPESDSPVKR|NQEDNTGKYPDIISR|TLSSFFTPR|LKPQEEEQSKPPAR|TENIPVCK|SIMSFFQPTK|LSPGVPLKPMLAHPTR…		0.40175	0	21.3221	0
Q9D0D5	Gtf2e1	Mus musculus	General transcription factor IIE subunit 1	3	3	0.0543284	1.52485	350269	202157	248001	200879	141662	193815	153075	T	8	1	0.285898	0.60867	49562.1	AGPDDNEEVMR|FNEQIEPIYALLR|AATAAGAAGLAGGHHR		0.09091	0	11.3215	0
Q3U1J4	Ddb1	Mus musculus	DNA damage-binding protein 1	15	15	0.0545646	0.742471	1.74938e+06	2.23648e+06	2.10115e+06	3354002	2867395	2242493	2.53148e+06	T	45	1	0.285651	-0.429594	126772	SVLLLAYKPMEGNFEEIAR|IGRPSETGIIGIIDPECR|TKGDFILVGDLMR|SDPGRETDDTLVLSFVGQTR|ALVSEWKEPQGK|MQEVVANLQYDDGSGMKR|LYEWTTEKELR|ALYYLQIHPQELR|TVPLYESPR|LGDSQLVK|LVFSNVNLK|SLSTTNVFACSDRPTVIYSSNHK|EATADDLIK|GAVYSMVEFNGK|TYEVSLR		0.17632	0	13.2054	0
Q9R1X4	Timeless	Mus musculus	Protein timeless homolog	2	2	0.0547914	1.62737	220583	280191	216561	126154	107523	220151	151732	T	2	1	0.285684	0.702539	137417	STDVAELEVLR|QILSTPLPR		0.01671	0.000503778	11.0711	5.37324e-05
Q99LE6	Abcf2	Mus musculus	ATP-binding cassette sub-family F member 2	19	18	0.0550334	1.19082	4687710	5.64484e+06	5504476	4.79834e+06	4.0328e+06	4.70033e+06	4.19006e+06	T	147	1	0.286183	0.251961	71735.8	YHQHLQEQLDLDLSPLEYMMK|LLTGELLPTDGMIR|SKLVDEEPQLTKR|FHWEQDQIAHMK|TRLELEENQMKR|VALVGPNGAGK|EVPIPEHIDIYHLTR|IPPPVIMVQNVSFK|ILHGLGFTPAMQR|YYTGNYDQYVK|EMPPSEKTPLQCVMEVDTER|LVDEEPQLTKR|LEELDADKAEMR|LVDEEPQLTK|LIQQVAQEIWVCEK|QQVSPIR|WPGDILAYKEHLK|DFSGGWR	MMASGLTER	0.34713	0	16.2934	0
Q4VAA2	Cdv3	Mus musculus	Protein CDV3	5	5	0.0556657	0.692987	652533	692915	901808	986653	1452870	990513	923371	T	20	1	0.288931	-0.529099	29711.3	AANAASGAGGSSAAAGSRPGDGGSLGSGAR|KTPQGPPEIYSDTQFPSLQSTAK|AITKDENEWKEFEQR|EVDYSGLR|SLDNFFAK		0.29893	0	13.2989	0
P61164|Q8R5C5	Actr1a|Actr1b	Mus musculus	Alpha-centractin|Beta-centractin	3	0	0.0558021	0.7664	479520	409408	386325	525921	695593	518241	490825	T	10	2	0.289041	-0.383831	42586.90552457767|42254.68766972168		YCFPNYVGRPK|AGFAGDQIPK|ISAPQER	0.07447|0.07447	0	12.0872	0
P07356	Anxa2	Mus musculus	Annexin A2	9	9	0.0560042	0.640242	1.62271e+06	2470419	1.52657e+06	3.21922e+06	3.28332e+06	2.07323e+06	3040054	T	78	1	0.290413	-0.64331	38651.8	TDLEKDIISDTSGDFRK|GVDEVTIVNILTNR|STVHEILCK|TPAQYDASELK|TKGVDEVTIVNILTNR|GLGTDEDSLIEIICSR|TNQELQEINR|QDIAFAYQR|SEVDMLK		0.28024	0	18.1905	0
P26369	U2af2	Mus musculus	Splicing factor U2AF 65 kDa subunit	13	13	0.0561058	0.556085	4938774	5369760	5904258	11582969	15470481	7.43294e+06	6626295	T	134	1	0.290318	-0.846623	53483.2	LGGLTQAPGNPVLAVQINQDKNFAFLEFR|LFIGGLPNYLNDDQVKELLTSFGPLK|SVDETTQAMAFDGIIFQGQSLK|SIEIPRPVDGVEVPGCGK|RPHDYQPLPGMSENPSVYVPGVVSTVVPDSAHK|IFVEFTSVFDCQK|IRRPHDYQPLPGMSENPSVYVPGVVSTVVPDSAHK|AFNLVKDSATGLSK|SDFDEFER|ELLTSFGPLK|NFAFLEFR|AMQGLTGR|YCDPDSYHRR		0.38526	0	25.2068	0
P62751	Rpl23a	Mus musculus	Large ribosomal subunit protein uL23	15	14	0.0563429	1.28359	21777646	16896952	19554624	12583730	15461811	17466790	15058256	T	202	1	0.290062	0.360181	17684.1	LAPDYDALDVANKIGII|KIEDNNTLVFIVDVK|KEAPAPPKAEAK|KLYDIDVAK|VNTLIRPDGEK|LDHYAIIKFPLTTESAMK|LAPDYDALDVANK|IEDNNTLVFIVDVK|FPLTTESAMK|RNKLDHYAIIK|NKLDHYAIIK|VNTLIRPDGEKK|LYDIDVAK|EAPAPPKAEAK	NKLDHYAIIKFPLTTESAMK	0.55128	0	28.2064	0
A2AQ25	Skt	Mus musculus	Sickle tail protein	6	6	0.0567555	1.61503	558331	533904	335038	350892	217142	258584	345693	T	9	1	0.291641	0.691561	212905	VVTLKDVEDGAFLLR|CSFMDVNPNSHAEQSR|TAVQVLSSGEVHDIVSQK|VMVDSISDTSR|SMTDVLTMLR|TLDSLEQTIK		0.04111	0	13.1557	0
P27659	Rpl3	Mus musculus	Large ribosomal subunit protein uL3	39	32	0.0571483	1.38931	30898774	31190178	31607572	21156792	16836922	28057188	25549546	T	454	1	0.293716	0.474366	46080.8	LEQQVPVNQVFGQDEMIDVIGVTK|EVVEAVTIVETPPMVVVGIVGYVETPR|DDASKPVHLTAFLGYK|KAHLMEIQVNGGTVAEK|AHLMEIQVNGGTVAEK|IGQGYLIKDGK|LIKNNASTDYDLSDKSINPLGGFVHYGEVTNDFIMLK|HGSLGFLPR|TVFAEHISDECK|SFPKDDASKPVHLTAFLGYK|KAFMGPLKK|LIKNNASTDYDLSDK|SINPLGGFVHYGEVTNDFIMLK|TVFAEHISDECKR|NNASTDYDLSDK|AGMTHIVR|TVFAEHISDECKRR|FIDTTSKFGHGR|KAFMGPLK|KSLLVQTK|IIAHTQMR|IGQGYLIK|IYKIGQGYLIKDGK|FYKNWHK|FQTMEEK|QLEKDFNSMKK|QLEKDFNS…	AHLMEIQVNGGTVAEKLDWAR|ERLEQQVPVNQVFGQDEMIDVIGVTK|NNASTDYDLSDKSINPLGGFVHYGEVTNDFIMLK|KAHLMEIQVNGGTVAEKLDWAR|KVACIGAWHPAR|VACIGAWHPAR|FIDTTSK	0.64516	0	26.4043	0
Q9WUA2	Farsb	Mus musculus	Phenylalanine--tRNA ligase beta subunit	15	15	0.0572334	1.25456	4.50348e+06	5.61749e+06	4.53639e+06	3.58824e+06	3.47025e+06	4491347	4025426	T	100	1	0.293637	0.327186	65655.3	ALVAIGTHDLDTLSGPFTYTAK|IDVPANRYDLLCLEGLAR|ASAGSAFFPGR|VRPFAVAAVLR|TPGFEIIHGLLDR|AQGASDVVLYK|LFEISDVVVK|TAEFQVAR|TTLLPGLLK|DLLFQALGR|LVITEETAK|LGVLHPDVITK|VGIRETPANLAK|SSTFPELPYRK|DRYDSFIELQEK		0.30051	0	19.2817	0
Q3UL36	Arglu1	Mus musculus	Arginine and glutamate-rich protein 1	17	16	0.0575283	0.593473	3.09832e+06	3.81842e+06	3.63196e+06	6419022	9320067	4.40408e+06	4604579	T	112	1	0.29454	-0.752747	32867.7	QQEIEEKLIEEETAR|IRQQEIEEKLIEEETAR|RVEELVAK|QLLEELERQR|EEEEKKAEFER|LIEEETAR|IRQQEIEEK|RVEEELEK|MKLEQER|RVEEELEKR|QQKEEQKIILGK|QAELAAQK|ILEENNR|KDEIEREVLR|EEQKIILGK|LAEEQLR	ERASSPPDRIDIFGR	0.44649	0	17.2404	0
P07607	Tyms	Mus musculus	Thymidylate synthase	20	16	0.0576119	0.595386	13875937	16960402	14567533	35942272	32377756	19014358	18591674	T	343	1	0.294422	-0.748104	34935.7	IWDANGSRDFLDSLGFSAR|KVETIDDFKVEDFQIEGYNPHPTIK|QEGDLGPVYGFQWR|HGELQYLR|DMDSDYSGQGVDQLQK|YSLRDEFPLLTTK|VETIDDFKVEDFQIEGYNPHPTIK|DFLDSLGFSAR|YSLRDEFPLLTTKR|HFGAEYK|VIDTIKTNPDDRR|IWDANGSR|GVLEELLWFIK|IQLQREPRPFPK|QVEHILR|VIDTIKTNPDDR	HFGAEYKDMDSDYSGQGVDQLQK|MLVVGSELQSDAQQLSAEAPR|TGTGTLSVFGMQAR|IIMCAWNPK	0.61889	0	25.3933	0
Q9CQM9	Glrx3	Mus musculus	Glutaredoxin-3	2	2	0.0576192	0.66753	212152	258147	243443	284695	490885	286699	397389	T	9	1	0.293524	-0.583096	37754.4	GDLVGGLDIVK|ELKDNGELLPILKGEN		0.08012	0	11.2714	0
Q925I1	Atad3	Mus musculus	ATPase family AAA domain-containing protein 3	14	14	0.0576201	1.27861	2486386	2.48824e+06	2.3462e+06	1.85591e+06	1524120	2.20525e+06	2.12378e+06	T	64	1	0.292632	0.35458	66700.6	LKEYEAAVEQLKSEQIR|RLVSRPQDALEGVILSPSLEAR|QRYEDQLKQQQLLNEENLR|GLLLFVDEADAFLR|DKWSNFDPTGLER|SWLFGIKGPK|LVSRPQDALEGVILSPSLEAR|ISVLEALRHPIQVSR|AKADRENADIIR|LKVAQFDYGKK|ISVLEALR|VFDWASTSRR|NVLMYGPPGTGK|ADRENADIIR		0.26227	0	17.2441	0
P80314	Cct2	Mus musculus	T-complex protein 1 subunit beta	28	26	0.0576385	0.904892	9627110	10998143	10810119	11235346	12119994	11271633	11634091	T	230	1	0.29183	-0.144183	57441.1	KLGGSLADSYLDEGFLLDKK|LGGSLADSYLDEGFLLDKK|LALVTGGEIASTFDHPELVK|TVYGGGCSEMLMAHAVTQLANR|DAALMVTNDGATILK|SLHDALCVLAQTVKDPR|GATQQILDEAER|EALLSSAVDHGSDEAR|FWQDLMNIAGTTLSSK|ASLSLAPVNIFK|HGINCFINR|TPGKEAVAMESFAK|AGADEERAETAR|LSSFIGAIAIGDLVK|AAHSEGHITAGLDMK|LKGSGNLEAIHVIKK|EAVAMESFAK|IHPQTIISGWR|NIGVDNPAAK|LKGSGNLEAIHVIK|KIHPQTIISGWR|EAESLIAKK|VAEIEHAEKEK|EAESLIAK|RQVLLSAAEAAEVILR|VLVDMSR	MLPTIIADNAGYDSADLVAQLR|ILIANTGMDTDKIK	0.61495	0	19.3523	0
Q9D662	Sec23b	Mus musculus	Protein transport protein Sec23B	11	9	0.0578876	1.35801	753932	1.0828e+06	824000	592106	551022	740502	717298	T	21	1	0.291903	0.441499	86381.5	ATYLEFIQQNEER|HLLQAPLDDAQEILQAR|SWHDIEKDNAR|SAMPVQQARPAQPQEQPFVSSR|IMLFTGGPPTQGPGMVVGDELKTPIR|LGVFRAESEEGPDVLR|AILNPLCQVDYR|QIQEMLGLTK|HYEMLANR	FSWNVWPSSR|SPFLQVFNNSPDESSYYR	0.21252	0	14.2044	0
P40124	Cap1	Mus musculus	Adenylyl cyclase-associated protein 1	10	9	0.058179	0.662155	869862	1.04489e+06	1.09436e+06	1.33247e+06	2.18526e+06	1.17808e+06	1.50567e+06	T	41	1	0.292361	-0.594759	51532.4	SALFAQINQGESITHALK|NSLDCEIVSAK|KEPALLELEGKK|HAEMVHTGLKLER|ADMQNLVER|HVSDDMKTHKNPALK|SSEMNVLIPTEGGDFNEFPVPEQFK|LEAVSHTSDMHCGYGDSPSK|TLWNGQK	VPTISINK	0.29114	0	16.2064	0
P84102	Serf2	Mus musculus	Small EDRK-rich factor 2	3	2	0.0581979	0.608907	716890	829554	586650	1.44283e+06	1.55051e+06	997405	800700	T	35	1	0.291483	-0.715706	6895.64	RRDDGLSAAAR|DDGLSAAAR	DSEIMQQK	0.32203	0	10.2657	0
Q9JKB1	Uchl3	Mus musculus	Ubiquitin carboxyl-terminal hydrolase isozyme L3	2	2	0.0585026	0.67617	176932	229344	186506	289774	385724	211454	300751	T	3	1	0.29194	-0.564541	26135	FLENYDAIR|TSDETLLEDAIEVCKK		0.1087	0.000997009	9.05837	5.37324e-05
Q9Z0U1	Tjp2	Mus musculus	Tight junction protein ZO-2	15	14	0.0586265	0.745829	1.98179e+06	1.58538e+06	1.71692e+06	2641807	2.84342e+06	1.96086e+06	2.07575e+06	T	41	1	0.291427	-0.423082	131200	STGDITAAGVTEASREPR|VFLRPSPEDEAIYGPNTK|MQELQEAQNAR|LATELPDLFQTAK|YQEEGPVPQPR|RPVVLFGPIADIAMER|KLFDQANK|DGNLHEGDIILK|VVDTLYDGK|VNTQDFR|LQLVVLR|MGATPTPFK|EAGFKRPVVLFGPIADIAMER|KSSPEPR	LGSQIFIK	0.13625	0	13.1445	0
Q8VDP4	Ccar2	Mus musculus	Cell cycle and apoptosis regulator protein 2	5	5	0.0587078	1.2376	367554	366790	349376	294518	284334	351362	246432	T	7	1	0.290976	0.30754	102938	GLVPHNGSLINVGSLLQR|SPAPPLLHVAALGQK|FSATEVTNK|RLTPLHLEMQR|LAEAEETARTAERQK		0.07375	0	13.2875	0
Q9WTP6	Ak2	Mus musculus	Adenylate kinase 2, mitochondrial	5	5	0.0587622	0.620025	287657	506497	310434	487731	763492	482840	606461	T	7	1	0.290481	-0.689602	26451.7	APNVLASEPEIPK|LAENFCVCHLATGDMLR|AVLLGPPGAGK|AMVASGSELGKK|LVSDEMVVELIEK		0.27615	0	11.149	0
Q9CZM2	Rpl15	Mus musculus	Large ribosomal subunit protein eL15	14	14	0.0587768	1.53495	19712284	24816732	20817076	11872870	10556085	19318500	16423055	T	135	1	0.289621	0.618196	24131.1	VLNSYWVGEDSTYKFFEVILIDPFHK|VLNSYWVGEDSTYK|RNPDTQWITKPVHK|GATYGKPVHHGVNQLK|FFEVILIDPFHK|GAYKYIQELWR|AKQGYVIYR|QGYVIYR|YIQELWR|SLQSVAEER|NPDTQWITKPVHK|FHHTIGGSRR|GLGKGHKFHHTIGGSR|NTLQLHR		0.53431	0	20.2672	0
Q61211	Eif2d	Mus musculus	Eukaryotic translation initiation factor 2D	4	4	0.0589091	0.908221	298013	310750	289218	301282	340864	341206	336117	T	4	1	0.289392	-0.138885	62790	GSTLEGSEVR|YIQGLEK|DSLQVQVQGNQIHHLGQLLLEEYRLPGK|SLYCVPANMTQLFLESGHKK		0.11404	0.00289436	8.22365	0.000294499
Q80XU3	Nucks1	Mus musculus	Nuclear ubiquitous casein and cyclin-dependent kinase substrate 1	1	1	0.0589793	0.607832	62225.2	61889.8	99579.5	135875	162851	98504.6	93645.4	T	3	1	0.289094	-0.718256	26297.6	ATVTPSPVK		0.03846	0.00289436	8.1455	0.000239199
P43274	H1-4	Mus musculus	Histone H1.4	16	6	0.0594436	1.20285	1922863	1.57727e+06	2.05722e+06	1.61019e+06	1.4447e+06	1.61846e+06	1.45738e+06	T	161	1	0.290381	0.266462	21964	SETAPAAPAAPAPAEKTPVK|TSGPPVSELITK|SETAPAAPAAPAPAEK|SETAPAAPAAPAPAEKTPVKK|KTSGPPVSELITK|RKTSGPPVSELITK	KALAAAGYDVEKNNSR|ALAAAGYDVEKNNSR|SGVSLAALKK|ALAAAGYDVEK|GTGASGSFKLNKK|KALAAAGYDVEK|GTGASGSFKLNK|ERSGVSLAALKK|SGVSLAALK|GTGASGSFK	0.34247	0	23.3405	0
Q8K2H2	Otud6b	Mus musculus	Deubiquitinase OTUD6B	2	2	0.0596161	3.63172	180534	181957	422525	41892.7	48850.6	42528.2	220312	T	2	1	0.290374	1.86065	33737.2	IAEAEIENLSGAR|HLESEKLAQILAAR		0.09184	0	13.1482	0
Q8BTV2	Cpsf7	Mus musculus	Cleavage and polyadenylation specificity factor subunit 7	6	6	0.0596546	0.53569	855207	748670	641222	1.74839e+06	2.18474e+06	1116237	869052	T	17	1	0.289773	-0.900531	51979.3	QNLSQFEAQAR|LLELLPGK|ATPSENLVPSSAR|AISSSAISK|DSGPPPSTVSEAEFEEIMKR|SYSVGASGSSSR		0.15499	0	11.2662	0
A2AR02	Ppig	Mus musculus	Peptidyl-prolyl cis-trans isomerase G	6	6	0.0598504	0.6844	1.52107e+06	1.3539e+06	1.26581e+06	2.30114e+06	2.60459e+06	1.4612e+06	1.86715e+06	T	39	1	0.289523	-0.547089	88271.9	VVFELFSDVCPK|HNKEFLLSMANR|ILSCGELIPK|VVKDFMVQGGDFSEGNGR|EFLLSMANR|EIENQKTDAASKPFAEVR		0.09309	0	13.3309	0
Q99NB9	Sf3b1	Mus musculus	Splicing factor 3B subunit 1	29	29	0.0600246	1.21736	4.00543e+06	3121914	3.86131e+06	3.1499e+06	2.65176e+06	3.15868e+06	3.03427e+06	T	126	1	0.289507	0.283762	145724	KPGYHAPVALLNDIPQSTEQYDPFAEHRPPK|KLSSWDQAETPGHTPSLR|VKPYLPQICGTVLWR|IVDDLKDEAEQYRK|KLTATPTPLGGMTGFHMQTEDR|TDRGGDSIGETPTPGASK|RWDQTADQTPGATPK|VQENCIDLVGR|AAGLATMISTMRPDIDNMDEYVR|VRQQAADLISR|IWDPTPSHTPAGAATPGRGDTPGHATPGHGGATSSAR|QLVDTTVELANKVGAAEIISR|TEILPPFFK|GGDSIGETPTPGASK|DTPGHGSGWAETPR|THEDIEAQIR|VGAAEIISR|MVMETIEK|WDETPGR|QQAADLISR|TYMDVMR|MTPPIKDLLPR|VVNGAAASQPPSKR|TMIISPERLDPFADGGKTPDPK|NRPL…		0.31595	0	22.238	0
P62754	Rps6	Mus musculus	Small ribosomal subunit protein eS6	23	19	0.0602758	1.3114	13503701	10539728	12599811	8818673	7813674	11413023	9366859	T	278	1	0.290162	0.391109	28663	RMATEVAADALGEEWKGYVVR|KGEKDIPGLTDTTVPR|GCIVDANLSVLNLVIVK|LFNLSKEDDVR|LNISFPATGCQK|KLFNLSKEDDVR|ISGGNDKQGFPMK|DIPGLTDTTVPR|QGFPMKQGVLTHGR|KLFNLSK|NKEEAAEYAK|QGVLTHGR|GEKDIPGLTDTTVPR|LIEVDDERK|LFNLSKEDDVRQYVVR|EDDVRQYVVR|LIEVDDER|KNKEEAAEYAK|DIPGLTDTTVPRR	MATEVAADALGEEWKGYVVR|MKLNISFPATGCQK|MATEVAADALGEEWK|ISGGNDKQGFPMKQGVLTHGR	0.51004	0	23.3642	0
P63037	Dnaja1	Mus musculus	DnaJ homolog subfamily A member 1	17	17	0.0603014	1.20285	4702738	4.98034e+06	4.33035e+06	3.38434e+06	3.95412e+06	4.47461e+06	3773254	T	138	1	0.289522	0.26646	44839.5	ITFHGEGDQEPGLEPGDIIIVLDQKDHAVFTR|NVVHQLSVTLEDLYNGATR|NVVHQLSVTLEDLYNGATRK|ITFHGEGDQEPGLEPGDIIIVLDQK|HYNGEAYEDDEHHPR|VNFPENGFLSPDKLSLLEK|TIVITSHPGQIVK|GKNVVHQLSVTLEDLYNGATR|CVLNEGMPIYR|QISQAYEVLADSK|GKNVVHQLSVTLEDLYNGATRK|NVICDKCEGR|FKQISQAYEVLADSK|ELYDKGGEQAIK|GAVECCPNCR|YHPDKNPNEGEKFK|GTGMQIR		0.44836	0	24.2089	0
P58771	Tpm1	Mus musculus	Tropomyosin alpha-1 chain	10	2	0.0608639	0.631918	252895	282523	273456	439357	638594	294912	398839	T	72	1	0.293356	-0.662192	32660.7	HIAEDADRKYEEVAR|AQKDEEKMEIQEIQLK	LATALQKLEEAEKAADESER|RIQLVEEELDRAQER|IQLVEEELDRAQER|LATALQKLEEAEK|KATDAEADVASLNRR|LEEAEKAADESER|EAETRAEFAER|ATDAEADVASLNRR	0.32042	0	21.22	0
G3X8U3	QNG1	Mus musculus	Queuosine 5'-phosphate N-glycosylase/hydrolase	1	1	0.0611148	0.606434	36312.1	37738.2	55341.9	94751.8	49604.6	83359.3	60578.4	T	2	1	0.293811	-0.721577	38590.6	AAELLLPAAAAWR		0.03846	0.00429799	8.11393	0.000348554
P63242	Eif5a	Mus musculus	Eukaryotic translation initiation factor 5A-1	9	2	0.0613074	0.757026	3.28834e+06	3.62751e+06	3.87305e+06	4518565	6000571	3.85175e+06	4833087	T	98	1	0.293737	-0.401586	16821.4	ADDLDFETGDAGASATFPMQCSALRK|YDCGEEILITVLSAMTEEAAVAIK	KYEDICPSTHNMDVPNIKR|VHLVGIDIFTGK|VHLVGIDIFTGKK|KYEDICPSTHNMDVPNIK|KNGFVVLK|NGFVVLK|IVEMSTSK	0.62338	0	19.3278	0
P63325	Rps10	Mus musculus	Small ribosomal subunit protein eS10	19	16	0.0614783	0.581395	6.05554e+06	5.47657e+06	7.36363e+06	14793856	14355144	8789992	7156622	T	231	1	0.293778	-0.78241	18903.8	KAEAGAGSATEFQFR|AEAGAGSATEFQFR|HFYWYLTNEGIQYLR|SAVPPGADKKAEAGAGSATEFQFR|IAIYELLFKEGVMVAKK|IAIYELLFKEGVMVAK|DYLHLPPEIVPATLR|IAIYELLFK|GEADRDTYRR|GYVKEQFAWR|FTRGEADRDTYR|KDVHMPKHPELADK|DVHMPKHPELADK|DYLHLPPEIVPATLRR|GGFGRGRGQPPQ|GPEGERPAR	HPELADKNVPNLHVMK|DVHMPKHPELADKNVPNLHVMK|EGVMVAKK	0.83636	0	20.4652	0
Q9Z2U0	Psma7	Mus musculus	Proteasome subunit alpha type-7	8	3	0.0615241	0.698638	865363	1.44172e+06	1.42186e+06	1607956	1848440	1.61032e+06	1.88327e+06	T	28	1	0.293239	-0.517383	27837.6	GKDIVVLGVEKK|NIELAVMR|GKDIVVLGVEK	ALLEVVQSGGK|AITVFSPDGHLFQVEYAQEAVKK|LTVEDPVTVEYITR|LYQTDPSGTYHAWK|AITVFSPDGHLFQVEYAQEAVK	0.33065	0	13.1952	0
P27641	Xrcc5	Mus musculus	X-ray repair cross-complementing protein 5	6	6	0.0616073	1.12526	881771	890218	825638	787557	747417	705008	842956	T	30	1	0.292816	0.170258	83004	NQVTAQDVFQDNHEEGPAAK|VGSVNPVENFR|KNEEEDIVEDLFPTSK|TLFPLTEVIK|HLMLPDFDLLEDIGNK|VMTMFVQR		0.11066	0	13.2535	0
Q8BK67	Rcc2	Mus musculus	Protein RCC2	32	32	0.0624968	0.69791	10610430	12408530	11187455	19727302	20591446	13452258	12927052	T	303	1	0.297695	-0.518888	55948.1	LIEALSHEAIVLAACGR|NHTLALTDTGSVFAFGENK|AAGAAAIITEPEHTKER|TVVSGSCAAHSLLITTEGK|SSIIVAADESTISWGPSPTFGELGYGDHKPK|TKDGQILPVPNVVVR|GQLLIFGATNWDLIGRK|TLDGIFSEQVAMGYSHSLVIARDESEAEKEK|AQRIEYDCELVPR|CKGQLLIFGATNWDLIGRK|DVACGANHTLVLDSQKR|LGHAEQKDEMVPR|GNLYSFGCPEYGQLGHNSDGK|AAGAAAIITEPEHTK|MGQLGLGNQTDAVPSPAQIMYNGQPITK|GAAWEEPSSGNGTAR|LQRLPEYTPR|RVAIFIEK|VFSWGFGGYGR|MACGAEFSMLMDCK|NLGQNLWGPHR|IEYDCELVPR|DGQILP…		0.71538	0	20.416	0
Q91WG4	Elp2	Mus musculus	Elongator complex protein 2	3	3	0.0626143	1.26163	413318	355662	356442	251387	354829	312286	277820	T	7	1	0.297206	0.335294	93033.9	NFVENFSVISR|VNCLQWIR|VVITNLNGHTAR		0.0373	0	10.1945	0
Q6NZJ6	Eif4g1	Mus musculus	Eukaryotic translation initiation factor 4 gamma 1	35	34	0.0632095	1.23743	10359609	9728430	8935659	7.41587e+06	6716212	9334581	7977902	T	203	1	0.299539	0.307345	175967	IRDPNQGGKDITEEIMSGAR|KVEYTLGEESEAPGQR|FSALQQTLPAENTDNRR|GLPLVDDGGWNTVPISK|EFLAEGQDVGSFVAEK|ITKPGSIDSNNQLFAPGGR|VFDWIDANLNEQQIASNTLVR|EMDEAATAEER|EAGLSWREFLAEGQDVGSFVAEK|LLTTIGKDLDFAK|GGPPGPPINR|SVTAFFNWLR|LGIESTLER|SDQWKPLNLEEK|TIDQIHKEAEMEEHREHIK|GSSGGSGAKPSDTASEATRPATLNR|GGPGGELPR|IHNAENIQPGEQKYEYK|AALSVDEVEKK|DITEEIMSGAR|TLAFEELRR|SFSKEVEER|MFFDALYDEDVVKEDAFYSWESSKDPAEQQGK|EAGLSWR|AIIEEYLHLNDM…	MDQYFNQMEK	0.265	0	19.319	0
Q8BVY0	Rsl1d1	Mus musculus	Ribosomal L1 domain-containing protein 1	8	8	0.0634411	1.23678	1.3255e+06	1.24688e+06	1.51004e+06	1.06199e+06	929253	1.24242e+06	1.18002e+06	T	40	1	0.299585	0.306594	50390.3	DVQEFRKPEASSFSTPR|KKVPVSVNLLAK|ATSLLTQSGLASSAPAK|KATSLLTQSGLASSAPAK|KAVEVISNR|MQENITGK|AVEVISNR|KPEASSFSTPR		0.14159	0	15.1225	0
P24369	Ppib	Mus musculus	Peptidyl-prolyl cis-trans isomerase B	15	12	0.0634494	0.582731	3.00714e+06	4178541	3.33226e+06	7.11633e+06	9052975	4572222	4280637	T	149	1	0.298749	-0.779099	23698.6	VIKDFMIQGGDFTRGDGTGGK|TVDNFVALATGEK|DTNGSQFFITTVK|VYFDLQIGDESVGR|TSWLDGKHVVFGK|SIYGERFPDENFK|DKPLKDVIIVDSGK|TVDNFVALATGEKGFGYK|VVFGLFGK|TSWLDGK|IEVEKPFAIAKE|SIYGERFPDENFKLK	VIKDFMIQGGDFTR|HYGPGWVSMANAGK|VLEGMDVVR	0.69907	0	16.1425	0
Q8R081	Hnrnpl	Mus musculus	Heterogeneous nuclear ribonucleoprotein L	18	18	0.0635734	1.27641	4.8367e+06	3595487	3781719	2.96987e+06	2.78963e+06	3.60682e+06	3.34677e+06	T	111	1	0.298195	0.352091	63923.2	GLIDGVVEADLVEALQEFGPISYVVVMPK|LNVFKNDQDTWDYTNPNLSGQGDPGSNPNKR|SKPGAAMVEMADGYAVDR|TENAGDQHGGGGGGGSGAAGGGGGENYDDPHKTPASPVVHIR|SSSGLLEWDSKSDALETLGFLNHYQMK|LKTENAGDQHGGGGGGGSGAAGGGGGENYDDPHKTPASPVVHIR|VFNVFCLYGNVEK|AITHLNNNFMFGQK|NPNGPYPYTLK|LCFSTAQHAS|FSTPEQAAK|IEYAKPTR|SDALETLGFLNHYQMK|YYGGGNEGGRAPK|MNVCVSK|NNRFSTPEQAAK|ISRPGDSDDSR|YYGGGNEGGR		0.42321	0	19.4115	0
P62075	Timm13	Mus musculus	Mitochondrial import inner membrane translocase subunit Tim13	2	2	0.0635928	0.585761	338724	318525	223006	669402	645592	374701	364358	T	9	1	0.297422	-0.771615	10450.9	VQIAVANAQELLQR|CIGKPGGSLDNSEQK		0.30526	0	17.4599	0
O08997	Atox1	Mus musculus	Copper transport protein ATOX1	3	3	0.0639766	0.628431	497683	646289	598147	741131	1.4285e+06	730789	920420	T	11	1	0.298781	-0.670173	7333.66	LGGVEFNIDLPNKK|VCIDSEHSSDTLLATLNK|AVSYLGPK		0.58824	0	14.1747	0
O70475	Ugdh	Mus musculus	UDP-glucose 6-dehydrogenase	14	14	0.0639892	1.12185	2.18892e+06	2427639	2.17198e+06	1856743	1.9764e+06	2.08882e+06	2148299	T	37	1	0.297956	0.165878	54797.3	EQIVVDLSHPGVSADDQVSR|LAANAFLAQR|VLIGGDETPEGQK|VLDGLHSELQTIGFQIETIGKK|ILTTNTWSSELSK|ALCAVYEHWVPKEK|IAILGFAFK|VTVVDVNEAR|IIDSLFNTVTDKK|VLDGLHSELQTIGFQIETIGK|RIPYTPGEIPK|YIEACAR|ESSSIYISK|ASVGFGGSCFQK		0.33063	0	19.2122	0
Q9Z0N1	Eif2s3x	Mus musculus	Eukaryotic translation initiation factor 2 subunit 3, X-linked	21	7	0.0640584	1.16841	8791131	9280352	10978473	8422669	7597794	8705579	8315433	T	138	1	0.297587	0.224547	51033.2	SCGSSTPDEFPTDIPGTK|IYKLDDPSCPRPECYR|LTPLSHEVISR|GVTIKPTVDDD|QDLATLDVTKLTPLSHEVISR|DSEGKLMCKPIFSK|RGVTIKPTVDDD	AGGEGGVTLGQPHLSR|SFDVNKPGCEVDDLKGGVAGGSILK|IVSLFAEHNDLQYAAPGGLIGVGTK|LSKNEVLMVNIGSLSTGGR|IVLTNPVCTEVGEK|NEVLMVNIGSLSTGGR|VGQEIEVRPGIVSK|QATINIGTIGHVAHGK|QDLATLDVTK|HILILQNK|AISGVHTVR|LIGWGQIR|IDPTLCR|LMCKPIFSK	0.51271	0	20.5568	0
O09110	Map2k3	Mus musculus	Dual specificity mitogen-activated protein kinase kinase 3	3	2	0.0641734	0.7225	112154	73540	87107.6	122729	102480	125657	149417	T	3	1	0.297659	-0.46893	39271.1	HAQSGTIMAVKR|TMDAGCKPYMAPER	GAYGVVEK	0.09798	0	10.0875	0
Q6ZWX6	Eif2s1	Mus musculus	Eukaryotic translation initiation factor 2 subunit 1	23	23	0.0647641	1.20459	7537175	7.77914e+06	9182764	6.05022e+06	6.56531e+06	7.72064e+06	6783488	T	199	1	0.300066	0.268538	36085.4	HVAEVLEYTKDEQLESLFQR|TEGLSVLNQAMAVIK|HAVSDPSILDSLDLNEDEREVLINNINR|IRADIEVACYGYEGIDAVKEALR|ADIEVACYGYEGIDAVKEALR|HAVSDPSILDSLDLNEDEREVLINNINRR|TEGLSVLNQAMAVIKEK|AGLNCSTETMPIKINLIAPPR|VVTDTDETELAR|AGLNCSTETMPIK|IGRNECVVVIR|FYQHKFPEVEDVVMVNVR|RPGYGAYDAFK|RGVFNVQMEPK|VSPEEAIKCEDKFTK|YVMTTTTLER|TAWVFDDKYK|INLIAPPR|TVYSILR|GVFNVQMEPK|TAWVFDDK|GYIDLSK|LTPQAVK		0.72698	0	22.3352	0
Q9CQ19	Myl9	Mus musculus	Myosin regulatory light polypeptide 9	5	2	0.0650171	0.659349	376583	303646	331748	703490	576850	456243	364253	T	21	1	0.300295	-0.600885	19841.5	NAFACFDEEASGFIHEDHLR|GNFNYVEFTR	LNGTDPEDVIR|ATSNVFAMFDQSQIQEFK|ELLTTMGDR	0.39535	0	13.3747	0
P43275	H1-1	Mus musculus	Histone H1.1	11	8	0.0660749	1.39657	6569231	3848040	5.31558e+06	3.58806e+06	3.31588e+06	4197466	3.62283e+06	T	91	1	0.303913	0.481884	21771.9	SETAPVAQAASTATEKPAAAKK|SETAPVAQAASTATEKPAAAK|SLAAAGYDVEKNNSR|KKPAGPSVSELIVQAVSSSK|KSLAAAGYDVEKNNSR|SLVNKGTLVQTK|GTGAAGSFKLNK|GTGAAGSFK	SGVSLAALKK|ERSGVSLAALKK|SGVSLAALK	0.43662	0	21.2099	0
Q6A026	Pds5a	Mus musculus	Sister chromatid cohesion protein PDS5 homolog A	14	14	0.0661192	1.30412	1.78603e+06	1764866	1.36167e+06	1.04541e+06	1297484	1.4788e+06	1.20224e+06	T	22	1	0.303207	0.383079	150232	IAPVHIDSEAISALVK|NTGHKIETDLPQIR|SVVANFIVKDLLMNDR|NKEINSDQSTQGNISSDRGK|FFTQPEKDFCNDKSYISEETR|NKEINSDQSTQGNISSDR|STLIPILHQK|AAGSQESLEAGNAKAPK|LAAGSAIMK|KFNQVLGDDEKLR|FNQVLGDDEKLR|SGLELLK|SALCNADSPKDPVLPMK|LLSAMLVSEGDLTEQKR		0.13288	0	14.1777	0
P19788	Mgp	Mus musculus	Matrix Gla protein	5	4	0.0661647	0.59063	857991	674944	781162	1.29225e+06	2.18734e+06	992023	1.01768e+06	T	27	1	0.302623	-0.759673	12351.1	YESHESMESYEISPFINRR|YAMVYGYNAAYNR|NKPAYEINR|EACDDYKLCER	NANTFMSPQQR	0.60577	0	14.3472	0
Q9CWK8	Snx2	Mus musculus	Sorting nexin-2	5	5	0.0669084	0.863803	593265	748553	685260	813771	785638	787067	730643	T	20	1	0.305881	-0.211225	58434.7	SAAMLGNSEDHTALSR|AVNTQALSGAGILR|SISAPVIFDR|TVKHPTLLQDPDLR|FSDFLGLHSK		0.12331	0	15.181	0
Q9CR70	Lage3	Mus musculus	EKC/KEOPS complex subunit Lage3	2	2	0.0676881	1.17292	369611	407588	434652	338055	305174	352467	383483	T	9	1	0.311073	0.23011	15814.1	AVIPSGAHPVAR|SMVPLTQRPGTR		0.16216	0	11.1815	0
P58252	Eef2	Mus musculus	Elongation factor 2	61	54	0.0679827	1.09018	27883720	32407478	30194852	28064236	27166366	27533442	27703704	T	544	1	0.31114	0.124563	95252.9	KIWCFGPDGTGPNILTDITK|LMEPIYLVEIQCPEQVVGGIYGVLNR|GVQYLNEIKDSVVAGFQWATK|ARPFPDGLAEDIDKGEVSAR|YVEPIEDVPCGNIVGLVGVDQFLVK|GLKEGIPALDNFLDKL|ALLELQLEPEELYQTFQR|AYLPVNESFGFTADLR|RGHVFEESQVAGTPMFVVK|STAISLFYELSENDLNFIK|KRGHVFEESQVAGTPMFVVK|YRCELLYEGPPDDEAAMGIK|CELLYEGPPDDEAAMGIK|ARYLAEKYEWDVAEAR|EGIPALDNFLDKL|CLYASVLTAQPR|VFSGVVSTGLK|SNTGGQAFPQCVFDHWQILPGDPFDNSSRPSQVVAETR|VAVEAKNPADLPK|ETVSEESNVLCLSK|YLAE…	WLPAGDALLQMITIHLPSPVTAQK|GHVFEESQVAGTPMFVVK|TGTITTFEHAHNMR|GGGQIIPTAR|GPLMMYISK|NMSVIAHVDHGK|GGGQIIPTARR	0.68182	0	22.3721	0
Q9JIK5	Ddx21	Mus musculus	Nucleolar RNA helicase 2	39	37	0.067985	1.27711	10181155	9009061	11216453	7.40157e+06	6.75718e+06	9698688	8.04879e+06	T	251	1	0.310338	0.35288	93493.2	GAVEALAAALAHISGATSVDQR|TFHHVYSGKDLIAQAR|GLDIPEVDLVVQSCPPKDVESYIHR|LSVACFYGGTPYGGQIER|TGVCICFYQNKEEYQLAQVEQK|NGNFGVLVATNVAAR|IKDHLQNGKLDLTK|SGIDILVGTPGR|LGSDGAEESMETLPKPSEK|APQVLVLAPTR|EGAFSNFPISEETVK|NGLSQPSEEEVDIPKPK|GVNFLFPIQAK|LKNGLSQPSEEEADIPKPK|ELANQVSKDFSDITKK|TEAVTEIQEK|KGPSEDDVDPPK|LKDGLSQPSEPK|TFSFAIPLIEK|NGLSQPSEEEADIPKPK|LLDSVPPTAISHFK|AAITVEHLAIK|LGSDGAEESMETLPKPSEKK|KDAQELSQNTCIK|AAV…	SKTEEATEGMEEAVSSK|QADSETKEIITEEPSEEEADMPKPK	0.58167	0	22.2615	0
Q9D0R4	Ddx56	Mus musculus	Probable ATP-dependent RNA helicase DDX56	2	2	0.0683355	1.46547	225542	202660	224421	120987	123176	218468	148431	T	5	1	0.31169	0.551359	61173.7	LLQAVTDLGWSRPTLIQEK|VANVSAAEDSASQR		0.06044	0	13.0825	0
P09602	Hmgn2	Mus musculus	Non-histone chromosomal protein HMG-17	1	1	0.0683846	0.674155	42274.2	71929.1	62787.3	81818.7	107327	87009.7	69657.3	T	9	1	0.311104	-0.568847	9417.07	LSAKPAPPKPEPK		0.14444	0.000503778	9.1333	4.14662e-05
Q8VBW6	Nae1	Mus musculus	NEDD8-activating enzyme E1 regulatory subunit	4	4	0.0684765	1.1488	408061	430443	416411	326258	344727	403597	386886	T	9	1	0.311032	0.200132	60235.7	QTPTFWILAR|LLCSNSAFLR|EGQGNLPVR|LLQSVGQAPESISEKELK		0.08801	0	10.237	0
P61957	Sumo2	Mus musculus	Small ubiquitin-related modifier 2	2	1	0.0690652	0.643429	379651	582088	566115	684796	911714	578116	1.01142e+06	T	10	1	0.315279	-0.636146	10864.4	TENNDHINLK	VAGQDGSVVQFK	0.23158	0	13.206	0
P53994	Rab2a	Mus musculus	Ras-related protein Rab-2A	4	1	0.0693579	0.708269	276492	470632	412016	502814	526818	484248	626288	T	6	1	0.316116	-0.49763	23532.7	DTFNHLTTWLEDAR	EHGLIFMETSAK|GAAGALLVYDITRR|LQIWDTAGQESFR	0.25	0	11.1597	0
P62301	Rps13	Mus musculus	Small ribosomal subunit protein uS15	22	22	0.0694827	1.52239	14310897	24887570	24741678	13488873	10744079	15489227	15094632	T	253	1	0.315704	0.606341	17211.7	KGLTPSQIGVILRDSHGVAQVR|LTSDDVKEQIYK|SKGLAPDLPEDLYHLIKK|SKGLAPDLPEDLYHLIK|LTSDDVKEQIYKLAK|KGLTPSQIGVILR|GLAPDLPEDLYHLIKK|GLAPDLPEDLYHLIK|FRLILIESR|GLTPSQIGVILR|GLSQSALPYRR|GLSQSALPYR|MHAPGKGLSQSALPYRR|RVLPPNWK|SVPTWLKLTSDDVKEQIYK|DSHGVAQVR|RSVPTWLK|VLPPNWK|LILIESR|SVPTWLK|LTSDDVK|YESSTASALVA		0.70861	0	24.3121	0
Q9DC23	Dnajc10	Mus musculus	DnaJ homolog subfamily C member 10	2	2	0.0694849	1.24609	186860	206813	207895	129373	168288	185856	164933	T	8	1	0.314874	0.317414	90525.1	AYEVLKDEDLR|LHPDKNPNNPNAHGDFLK		0.03657	0.000503778	9.1306	4.14662e-05
P25976	Ubtf	Mus musculus	Nucleolar transcription factor 1	8	8	0.0700588	1.32106	1.18233e+06	820743	1.06101e+06	636777	761599	798192	881820	T	31	1	0.317144	0.401696	89453.2	FSQELLSNGELNHLPLKER|FREDHPDLIQNAK|LHPEMSNLDLTK|TPQQLWYTHEK|KKDYEVELLR|AAYKEYISNK|AMEMTWNNMEKK|TLTELILDAQEHVK		0.13203	0	16.1369	0
Q9Z1Q9	Vars1	Mus musculus	Valine--tRNA ligase	36	36	0.070262	1.18407	8271520	7.73511e+06	8.30888e+06	6594736	5892880	7769524	7255980	T	222	1	0.317707	0.243755	140127	VPLEVQEADEAKLQQTEAELR|KVDEAIALFQK|SILYVSPHPDAFPSLR|GPGQDPQAALGALGK|AVLGEVALYSGAR|SVTQQPGSEVIAPQKTPAQLKK|CGEMAQAASAAVTR|ITPAHDQNDYEVGQR|IETMLGDVAVAVHPK|GVKDNPMVVPLCNR|YGEAGDGPGWGGPHPR|HRLEAISIMDSK|LSATVTEAFVR|GFVPSATSKPEGHESLVDR|VPLEVQEADEAK|LVNWSCTLNSAISDIEVDKK|SKDVVEPLLRPQWYVR|TWHSWMDNIRDWCISR|SVTQQPGSEVIAPQK|QGFFKPEYGRPSVSAPNPR|FGLCAYTSQGR|IPAYFITVHDPAVPPGEDPDGR|ALNPLEDWLR|LGSSLDWDR|KAVLAALK|LH…		0.365	0	26.3076	0
Q8K019	Bclaf1	Mus musculus	Bcl-2-associated transcription factor 1	27	26	0.0709543	0.628405	3.96175e+06	4041477	4886136	7.77419e+06	10087755	4.78493e+06	5717945	T	162	1	0.320721	-0.670234	105939	GRADGDWDDQEVLDYFSDKESAK|RPKEEEWDPEYTPK|STSESFIQHIVSLVHHVK|LLASTLVHSVKK|SQEEPKDTFEHDPSESIDEFNK|GFKEEIQKGDK|SPAVTLNER|SSFYPEGDQETAK|TITPQNAPR|LLASTLVHSVK|DRLLASTLVHSVK|DRLLASTLVHSVKK|MIASDSHRPEVK|LKETAYIVERPSTAK|SIFDHIKLPQANK|KAEGEPQEESPLKSK|TITPQNAPREESR|FTDEESRVFLLDR|SIFREESPLRIK|KAEGEPQEESPLK|SIFREESPLR|LKELFDYSPPLHK|MAPVPLDDSNRPASLTK|VFLLDRGNIR|FTDEESR|SSFYPEGDQETAKTGK	EEEWDPEYTPK	0.27639	0	15.2258	0
P46660	Ina	Mus musculus	Alpha-internexin	3	1	0.0710798	0.70011	292414	368109	216519	460723	431748	328142	424521	T	35	1	0.320958	-0.514347	55349.3	LPASDGLDLSQAAAR	HLREYQDLLNVK|EYQDLLNVK	0.05389	0	17.1871	0
Q99LB2	Dhrs4	Mus musculus	Dehydrogenase/reductase SDR family member 4	6	6	0.0713162	1.4163	750668	877724	887051	804258	523883	632687	455579	T	14	1	0.321049	0.502129	29865.7	RLAEDGAHVVVSSR|VNCLAPGLIK|NFAAELAPK|VALVTASTDGIGFAIAR|TALLGLTK|LAEDGAHVVVSSR		0.20789	0	11.3222	0
Q8BIZ6	Snip1	Mus musculus	Smad nuclear-interacting protein 1	5	5	0.0713173	0.527465	848408	914767	900950	2153537	2899738	1.12023e+06	1.14612e+06	T	27	1	0.320218	-0.922854	44388.6	EKPSFELSGALLEDTNTFR|IADIPIDHPSCSK|VKPYIIDLGSGNGTFLNNK|QSAYLLGR|RIADIPIDHPSCSK		0.15666	0	13.3598	0
Q9Z1P6	Ndufa7	Mus musculus	NADH dehydrogenase [ubiquinone] 1 alpha subcomplex subunit 7	6	6	0.0714051	0.663598	617356	473434	586551	857254	1.22083e+06	744618	630205	T	27	1	0.319576	-0.591619	12567.6	AAESSAMAATEK|NWASGQDLQAK|LSNNYYCTR|LRNWASGQDLQAK|KAVTPAPPMKR|AAESSAMAATEKK		0.39823	0	12.1655	0
P70372	Elavl1	Mus musculus	ELAV-like protein 1	13	13	0.071524	1.27235	2.25575e+06	1.67138e+06	2.03379e+06	1519364	1.31589e+06	1.61381e+06	1.78815e+06	T	39	1	0.319289	0.347495	36146.1	VSYARPSSEVIKDANLYISGLPR|VAGHSLGYGFVNYVTAK|TNLIVNYLPQNMTQEELR|SLFSSIGEVESAK|TMTQKDVEDMFSR|VLVDQTTGLSR|SNGYEDHMAEDCRDDIGR|NMALLSQLYHSPAR|SEAEEAITSFNGHKPPGSSEPITVK|AISTLNGLR|ILQVSFK|DVEDMFSR|DKVAGHSLGYGFVNYVTAK		0.52147	0	16.2094	0
P14602	Hspb1	Mus musculus	Heat shock protein beta-1	9	8	0.0715313	0.733866	2475696	3.4625e+06	3.05337e+06	3.60048e+06	5229754	3.5011e+06	4.0642e+06	T	86	1	0.318468	-0.446411	22999.7	AVTQSAEITIPVTFEAR|KYTLPPGVDPTLVSSSLSPEGTLTVEAPLPK|VSLDVNHFAPEELTVK|AQIGGPEAGKSEQSGAK|RVPFSLLR|LFDQAFGVPR|EGVVEITGKHEERQDEHGYISR|SPSWEPFRDWYPAHSR	QLSSGVSEIR	0.70335	0	18.4242	0
P36916	Gnl1	Mus musculus	Guanine nucleotide-binding protein-like 1	8	8	0.0716418	0.780684	610158	546102	723451	867791	920416	754652	670070	T	21	1	0.318472	-0.357189	68728.6	RLNQQPSQGLGPR|LNQQPSQGLGPR|TPQEPGGVLKK|YKDGVVTIGCIGFPNVGK|YFQTYFLTPSVK|IPVQALLHLR|ACEAITVGK|SFQEYLGK		0.13344	0	13.2874	0
Q80XP8	Fam76b	Mus musculus	Protein FAM76B	4	4	0.0717444	0.61148	234916	246189	253298	523649	522970	386356	242316	T	8	1	0.318322	-0.709623	38531.3	AASALYACTK|SSAAIQNETPK|KYGAPQTCEQCK|YGAPQTCEQCK		0.09735	0	13.3462	0
Q99KN9	Clint1	Mus musculus	Clathrin interactor 1	3	3	0.0720424	1.34128	612164	422692	445023	359086	320033	445002	338479	T	12	1	0.318469	0.423611	68468.8	HIHITQATETTTTR|SLENYHFVDEHGKDQGINIR|SKWDEEWDKNK		0.07132	0	14.2733	0
Q64521	Gpd2	Mus musculus	Glycerol-3-phosphate dehydrogenase, mitochondrial	12	12	0.0731516	0.832043	961575	1.15878e+06	888904	1310214	1.25551e+06	1.11494e+06	1.12318e+06	T	15	1	0.323939	-0.265269	80902.5	LVQDYGLESEVAQHLAK|TVGLFLQGGKDWSPTLYIR|SMAEDTVDAAVK|EAQLMTLK|RVPIPVDR|LVSEFPYIEAEVK|CKDVLTGQEFDVR|MNLAIALTAAR|TYGDKAFEVAK|AIMNLDVEQYR|TAEENLDR|FHKFDEDEKGFITIVDVQR		0.20633	0	14.0815	0
Q9DB34	Chmp2a	Mus musculus	Charged multivesicular body protein 2a	3	3	0.0733743	0.674708	183466	257279	310788	403238	446895	336506	285765	T	13	1	0.324173	-0.567664	25117.9	RKTPEELLR|ANIQAVSLK|IMMEFER		0.11261	0.00523062	9.13338	0.000416551
P48760	Fpgs	Mus musculus	Folylpolyglutamate synthase, mitochondrial	4	4	0.0734895	1.20134	427095	478915	368725	373469	315793	341207	380175	T	7	1	0.323615	0.264639	64914.3	TLNTLQTNASYLEQVKR|NLLNHPTANSGASILR|TGFFSSPHMVQVR|SGLQVEDLNRLNIIHVTGTK		0.11244	0	17.2088	0
Q9D8E6	Rpl4	Mus musculus	Large ribosomal subunit protein uL4	42	37	0.0735382	1.41156	46267664	33246170	45895124	24834192	24870564	38233540	31121802	T	477	1	0.322798	0.497295	47124	NNRQPYAVSELAGHQTSAESWGTGR|ACARPLISVYSEKGESSGK|GHRIEEVPELPLVVEDKVEGYK|VKKLEAAATALATK|IEEVPELPLVVEDKVEGYKK|QPYAVSELAGHQTSAESWGTGR|KNNRQPYAVSELAGHQTSAESWGTGR|ACARPLISVYSEK|APIRPDIVNFVHTNLR|KLEAAATALATKSEK|RYAICSALAASALPALVMSK|APIRPDIVNFVHTNLRK|NIPGITLLNVSKLNILK|GPCIIYNEDNGIIK|PLISVYSEKGESSGKNVTLPAVFK|RGPCIIYNEDNGIIK|PLISVYSEKGESSGK|KLDELYGTWR|LEAAATALATK|NVTLPAVFKAPIRPDIVNFVHTNLR|GHRIEEVPELPLVVEDK|N…	YAICSALAASALPALVMSK|KLEAAATALATK|SGQGAFGNMCR|ILKSPEIQR|MMNTDLSR	0.642	0	28.3391	0
Q8BG05	Hnrnpa3	Mus musculus	Heterogeneous nuclear ribonucleoprotein A3	23	22	0.0735669	1.16608	9451073	7569570	7.60073e+06	6648733	7413160	7171454	6791313	T	175	1	0.322025	0.221661	39627.6	SSGSPYGGGYGSGGGSGGYGSR|KLFIGGLSFETTDDSLREHFEK|RGFAFVTFDDHDTVDKIVVQK|GFGFVTYSCVEEVDAAMCARPHK|GFAFVTFDDHDTVDKIVVQK|LFIGGLSFETTDDSLREHFEK|IFVGGIKEDTEEYNLRDYFEK|GFGFVTYSCVEEVDAAMCARPHKVDGR|WGTLTDCVVMRDPQTKR|IFVGGIKEDTEEYNLR|MEVKPPPGRPQPDSGR|IETIEVMEDR|RGEEGHDPKEPEQLR|WGTLTDCVVMRDPQTK|KIFVGGIKEDTEEYNLR|AVSREDSVKPGAHLTVK|GFAFVTFDDHDTVDK|YHTINGHNCEVK|EDSVKPGAHLTVK|GEEGHDPKEPEQLRK|YHTINGHNCEVKK|EDSVKPGAH…	YGKIETIEVMEDR	0.5409	0	24.4045	0
P0DJF2	Pet117	Mus musculus	Protein PET117 homolog, mitochondrial	1	1	0.0736344	0.425797	29369.6	29088	31475.6	54403.4	155716	83238.9	34754.8	T	1	1	0.321457	-1.23176	9118.03	LLGEQIILTK		0.125	0.000503778	9.13483	5.37324e-05
Q8C0C7	Farsa	Mus musculus	Phenylalanine--tRNA ligase alpha subunit	14	14	0.0736345	1.24432	3.16809e+06	4073254	3.92733e+06	2.74323e+06	2.62954e+06	3.36957e+06	3.21866e+06	T	77	1	0.320652	0.315354	57562.7	RLEVADGGLDSAELATQLGVEHQAVVGAVK|ADNPVLELLLR|SLQALGEVIEAELR|AFSTSVSKQEAELSPEMISSGSWR|LQLVQAGQAEK|DRPFKPYNFSAR|GVLPDSGHLHPLLK|VVDSIEDEVQKR|FKPAYNPYTEPSMEVFSYHQGLKK|KLLTEVILK|YGINNIR|DQHDTFFLRDPAEALQLPMGYVQR|LLTEVILK|ALYQLAQK		0.3937	0	25.2528	0
P08043	Zfp2	Mus musculus	Zinc finger protein ZFP2	2	0	0.0738179	1.57289	93241.1	113242	101648	87781.7	47020.2	85212.1	51046.2	T	7	1	0.32125	0.653419	52500.1		THTGEKPYECNQCGK|IHTGEKPYQCNECGK	0.06536	0.000503778	9.20186	4.14662e-05
Q9R1Q7	Plp2	Mus musculus	Proteolipid protein 2	1	1	0.0738379	0.684869	90109	136090	125901	178798	211601	124856	171704	T	4	1	0.320559	-0.546099	16596.7	HTAAPTDPTDGP		0.07895	0	9.3664	0
P62717	Rpl18a	Mus musculus	Large ribosomal subunit protein eL20	20	18	0.0740305	1.33064	10263473	12911594	12356798	7.98951e+06	7154569	10687213	10077784	T	151	1	0.320537	0.412119	20718.9	EYRDLTTAGAVTQCYR|SSGEIVYCGQVFEKSPLR|ARAHSIQIMKVEEIAAGK|DLTTAGAVTQCYR|SSGEIVYCGQVFEK|SRFWYFVSQLKK|IFAPNHVVAK|KSSGEIVYCGQVFEK|VKNFGIWLR|SRFWYFVSQLK|MRIFAPNHVVAK|FTTKRPNTFF|NFGIWLR|VEEIAAGK|FWYFVSQLKK|SGTHNMYREYRDLTTAGAVTQCYR|CHTPPLYR|ARAHSIQIMK	AHSIQIMKVEEIAAGK|AHSIQIMK	0.63636	0	18.3386	0
P26516	Psmd7	Mus musculus	26S proteasome non-ATPase regulatory subunit 7	8	8	0.0740594	0.757573	736708	1.07023e+06	1.00578e+06	1.38042e+06	1.32685e+06	1.03735e+06	1.17286e+06	T	48	1	0.319772	-0.400542	36517.2	VVVHPLVLLSVVDHFNR|PELAVQK|VVGVLLGSWQK|DIKDTTVGTLSQR|LHKNDIAINELMK|TFEHVTSEIGAEEAEEVGVEHLLR|IVGWYHTGPK|YCPNSVLVIIDVKPK		0.34268	0	15.2743	0
Q9CXW3	Cacybp	Mus musculus	Calcyclin-binding protein	9	9	0.0743271	0.921205	1.58736e+06	1.64042e+06	1.66946e+06	1.69735e+06	1.83695e+06	1.88535e+06	1.67593e+06	T	28	1	0.320594	-0.118407	26493.8	ASVLEELQKDLEEVK|EKPSYDTEADPSEGLMNVLKK|TDTVIILCR|SKIETELKNK|ASVLEELQKDLEEVKVLLEK|IYEDGDDDMKR|SFDLLVK|KIYEDGDDDMKR|NYSMIVNNLLKPISVESSSK		0.42795	0	17.2426	0
Q8K2B3	Sdha	Mus musculus	Succinate dehydrogenase [ubiquinone] flavoprotein subunit, mitochondrial	15	15	0.0743682	0.875523	2.68272e+06	2.80059e+06	2836545	2.89197e+06	3261172	2.97565e+06	3.58317e+06	T	78	1	0.320069	-0.191783	72539.2	TGHSLLHTLYGR|LGANSLLDLVVFGR|ANAGEESVMNLDKLR|TYFSCTSAHTSTGDGTAMVTR|VDEYDYSKPIQGQQK|VGSVLQEGCEK|ACALSIAESCRPGDKVPSIK|KHTLSYVDIK|ISQLYGDLK|SMQNHAAVFR|SMTLEIR|AKNTVIATGGYGR|GVIALCIEDGSIHR|AFGGQSLK|NTVIATGGYGR		0.26958	0	14.1483	0
Q9EQ80	Nif3l1	Mus musculus	NIF3-like protein 1	8	8	0.0744671	0.611385	751718	1.08495e+06	1.05083e+06	2.07093e+06	2.04933e+06	1.09359e+06	1.25537e+06	T	27	1	0.319626	-0.709847	41719.4	GVGGVSVTSFPAR|VAVYSPHTAYDAAPQGVNSWLAK|APDYPTEGAHRLEFSVNR|SQDLDKVMSTLR|GLGTCTTRPIHPSR|TEILSLEKPLLLHTGMGR|INIILSETDRDPLRVV|ISLNCTQK		0.32447	0	13.2566	0
Q8K224	Nat10	Mus musculus	RNA cytidine acetyltransferase	11	11	0.0745994	1.28318	1.46714e+06	1786605	1.94355e+06	1.17149e+06	1.19708e+06	1.56597e+06	1472301	T	32	1	0.319224	0.359724	115346	TLSDDLDEAAKEFQEK|IAVHPDYQGMGYGSR|TLHEVSLQESIR|AGQNASIVSLK|AGFVPVYLR|VLETPQEIR|QSILNSLSR|ALQLLQMYYEGKFPCLEEK|STVALTAAR|FIEGISEK|SLFVVVGDR		0.12305	0	14.0806	0
Q9DB42	Znf593	Mus musculus	Zinc finger protein 593	6	5	0.0749359	0.619988	1851867	1.7866e+06	2383160	4187168	4.4032e+06	2.36186e+06	2.43919e+06	T	59	1	0.319706	-0.689688	15137.7	LKQLSVEPYSQEEAER|QLSVEPYSQEEAER|RPDLDEIHR|LGVPTEVSTDIPEMDTST|YFIDSANLK	AAGMGSYVQPQR	0.47761	0	16.1558	0
P43024	Cox6a1	Mus musculus	Cytochrome c oxidase subunit 6A1, mitochondrial	2	2	0.0750283	1.62027	288486	216654	322987	118466	144145	187588	248975	T	6	1	0.319335	0.696232	12344.3	HEEHERPPFVAYPHLR|TKPFPWGDGNHTLFHNPHVNPLPTGYEDE		0.40541	0	10.0634	0
Q8BGD9	Eif4b	Mus musculus	Eukaryotic translation initiation factor 4B	34	33	0.0750761	0.606359	8830772	8700343	8679847	19662648	19902662	11732405	9387190	T	342	1	0.31878	-0.721755	68799.2	SPPYTAFLGNLPYDVTEDSIKDFFR|DGNKVDVVGATQGQAGSCSR|AASIFGGAKPVDTAAR|SAPKEDDASASTSQSSR|GFGYAEFEDLDSLLSALSLNEESLGNRR|KDGNKVDVVGATQGQAGSCSR|NRDSDKTDTDWR|RGDDSFGDKYR|LPREPSNPDR|SRTGSESSQTGASATSGR|VDVADQAQDKDRDDR|VAAVQPPEEGPSR|TGSESSQTGASATSGR|DRYDSDRYR|VAAVQPPEEGPSRK|ARPTTDSFDDYPPR|VMPAPPPKENAWVK|DDRGPPQRPR|DSDKTDTDWR|GGGDRYEDRYDR|LPREPSNPDRLK|DYDRGYDSR|DDYSRDDYRR|SQSSDTEQPSPTSGGGK|SILPTAPR|AFGSGYR|QLDEP…	VMPAPPPKENAWVKR	0.53682	0	26.2308	0
Q8K4L0	Ddx54	Mus musculus	ATP-dependent RNA helicase DDX54	4	4	0.0753196	1.42255	467499	440885	443599	303581	240056	454224	303858	T	8	1	0.318764	0.508477	97687.3	SRPAPSPESIKR|TACFLLPMFER|ALILSPTR|TIPVILDGKDVVAMAR		0.05378	0	11.2152	0
O54931	Pakap	Mus musculus	PALM2-AKAP2 fusion protein	6	6	0.0756186	0.811177	709813	512642	625550	736904	706607	851757	723759	T	25	1	0.319233	-0.301911	120718	AVLTVVKDEDHGILDQFSR|TIEEQLDEEHLESHRK|LWAEDGEFTSAR|KQFQLMENSR|YSEAAELR|TLSMIEEEIR		0.06887	0	16.2498	0
Q9CY58	Serbp1	Mus musculus	SERPINE1 mRNA-binding protein 1	25	24	0.0759026	0.742893	11064911	9433596	10538878	16225218	16759880	12964757	10575348	T	324	1	0.31937	-0.428773	44687.3	PGHLQEGFGCVVTNRFDQLFDDESDPFEVLK|GGSGSHNWGTVKDELTESPK|TDKSSASAPDVDDPEAFPALA|KPANDITSQLEINFGDLGR|SAAQAAAQTNSNAAGK|RPDQQLQGDGKLIDR|PGHLQEGFGCVVTNR|FDQLFDDESDPFEVLK|KPNEGADGQWK|RFEKPLEEK|SEEAHAEDSVMDHHFR|SSASAPDVDDPEAFPALA|RPDQQLQGDGK|KPNEGADGQWKK|EAGGGGVGGPGAK|SSFSHYSGLKHEDKR|VGRRPDQQLQGDGK|KEETQPPVALKK|EETQPPVALKK|RGGSGSHNWGTVKDELTESPK|EMTLDEWK|KGFVLHK|AKVEFNIR|FEKPLEEK	SKSEEAHAEDSVMDHHFR	0.55528	0	27.2816	0
Q61553	Fscn1	Mus musculus	Fascin	27	27	0.0759313	1.08418	6687540	6848730	6600458	6738198	6170383	5.93294e+06	5952908	T	167	1	0.318773	0.11661	54473.9	VGKDELFALEQSCAQVVLQAANER|LVARPEPATGFTLEFR|QIWTLEQPPDEAGSAAVCLR|YAHLSARPADEIAVDRDVPWGVDSLITLAFQDQR|YLAADKDGNVTCEREVPDGDCR|SSYDVFQLEFNDGAYNIK|LSCFAQSVSPAEK|KNGQLAASVETAGDSELFLMK|KQIWTLEQPPDEAGSAAVCLR|WSVHIAMHPQVNIYSVTR|LINRPIIVFR|YLAADKDGNVTCER|FLVVAHDDGR|YLAPSGPSGTLK|YFGGTEDRLSCFAQSVSPAEK|YLTAEAFGFK|LINRPIIVFRGEHGFIGCR|VAFRDCEGR|YLKGDHAGVLK|YFGGTEDR|ACAETIDPASLWEY|GEHGFIGCR|NASCYFDIEWCDRR|VTGTLDAN…		0.65314	0	21.4473	0
O08795	Prkcsh	Mus musculus	Glucosidase 2 subunit beta	4	4	0.076477	0.587482	266357	231444	338286	666723	521044	277226	500372	T	6	1	0.320202	-0.767384	58755.8	SLEDQVETLR|SLKEMEESIR|ESLQQLAEVTR|ILIEEWK		0.07294	0	10.1641	0
Q99LF4	Rtcb	Mus musculus	RNA-splicing ligase RtcB homolog	20	19	0.0770081	1.25735	7089862	5888542	6013325	4.19113e+06	4.71012e+06	5941798	5.40228e+06	T	100	1	0.321481	0.330384	55213.9	TNLDESDVQPVKEQLAQAMFDHIPVGVGSK|VFNTTPDDLDLHVIYDVSHNIAK|LVMEEAPESYKNVTDVVNTCHDAGISKK|GLGHQVATDALVAMEK|NLDFQDVLDKLADMGIAIR|GMAAAGNYAWVNR|NYNDELQFLDKINK|GGGVGGFLPAMK|IASPEGQDYLK|EGYAWAEDKEHCEEYGR|NYNDELQFLDK|SSMTFLTR|GQVCVMIHSGSR|IASPEGQDYLKGMAAAGNYAWVNR|DKIIVNDR|QIGNVAALPGIVHR|LMFEELR|VEQHVVDGKER|LRPIAVIKG	MLQADPNKVSPR	0.52277	0	19.3396	0
Q9EPL8	Ipo7	Mus musculus	Importin-7	10	9	0.0774297	0.845449	1.19526e+06	1.46935e+06	1314543	1.73223e+06	1.57317e+06	1.37322e+06	1.59592e+06	T	41	1	0.322801	-0.24221	119410	NPVWYQALTHGLNEEQR|VLQQTLNYINQGVSHALTWK|NPVWYQALTHGLNEEQRK|VLTGVAGEDAECHAAK|AIFQTIQNR|AFAVGVQQVLLK|KKDGALHMIGSLAEILLK|GTMDPALR|QAGVIYLK	LLEVIILQCK	0.11464	0	15.1266	0
Q9QZD9	Eif3i	Mus musculus	Eukaryotic translation initiation factor 3 subunit I	18	17	0.077464	0.855941	6235826	5.34067e+06	6309316	6735143	7944211	6705654	6486562	T	146	1	0.322201	-0.224416	36437.6	TERPVNSAALSPNYDHVVLGGGQEAMDVTTTSTR|ITSAVWGPLGECVIAGHESGELNQYSAK|GHFGPINSVAFHPDGK|SGEVLVNVKEHSR|DMTMFVTASKDNTAK|SGEVLVNVK|TFRTERPVNSAALSPNYDHVVLGGGQEAMDVTTTSTR|LWDCETGKQLALLK|SYSSGGEDGYVR|FFHLAFEEEFGR|VKGHFGPINSVAFHPDGK|LFDSTTLEHQK|DMTMFVTASK|KPILLQGHER|QINDIQLSR|LWDCETGK|IGKFEAR	MKPILLQGHER	0.57538	0	22.2579	0
Q02053	Uba1	Mus musculus	Ubiquitin-like modifier-activating enzyme 1	17	12	0.0775109	0.734129	2.78699e+06	3.1212e+06	3.20701e+06	4.19127e+06	4.8947e+06	2.98121e+06	4.76273e+06	T	79	1	0.321432	-0.445894	117734	AAVASLLQSVQVPEFTPK|LAGTQPLEVLEAVQR|DNPGVVTCLDEAR|IHVSDQELQSANASVDDSRLEELK|MLQTSSVLVSGLR|NEEDATELVGLAQAVNAR|QMNPYIQVTSHQNR|AENYDISPADR|LDQPMTEIVSR|GNVQVVIPFLTESYSSSQDPPEK|ATLPSPDKLPGFK|ERLDQPMTEIVSR	KPLLESGTLGTK|QLYVLGHEAMK|LVVADTR|NIILGGVK|SIPICTLK	0.20888	0	18.0926	0
P52431	Pold1	Mus musculus	DNA polymerase delta catalytic subunit	13	13	0.0778779	1.19046	1.82154e+06	2.26434e+06	1.71554e+06	1.50088e+06	1.57253e+06	1.70225e+06	1.68353e+06	T	38	1	0.322857	0.251514	123712	LGLKPDEFIKTPTGDEFVK|FGVSSVAEAMSLGR|VTGVPLGYLLTR|AQALKVDRFPFLGR|IFEPILGEGR|VGGLLAFTK|IDISQLVITK|NSVPILR|GGKELSGPAVLAIELCSR|LALTLRPCAPILGAK|EVSHLNALEER|DNCPLVANLVTSSLRR|VVSQLLR		0.14661	0	15.1289	0
Q60793	Klf4	Mus musculus	Krueppel-like factor 4	2	2	0.0779356	1.43912	179575	159829	173958	97204.5	130740	167494	93464.9	T	3	1	0.322356	0.525184	51847.6	IKQEAVPSCTVSR|TLRPAGAPTNR		0.04969	0.000503778	10.1371	4.14662e-05
Q99LL5	Pwp1	Mus musculus	Periodic tryptophan protein 1 homolog	4	4	0.078114	1.48507	1.02608e+06	735172	1.00018e+06	572864	436974	785101	718536	T	15	1	0.32237	0.57053	55552.1	ETPDKVELSKEEVNR|IWDILGDRPSLIHSR|GCLVTASADKFVK|FSGQIER		0.0998	0	12.1407	0
Q9Z1F9	Uba2	Mus musculus	SUMO-activating enzyme subunit 2	19	18	0.0782452	1.07884	3.96353e+06	4.12016e+06	4.30078e+06	3.66303e+06	3.6828e+06	4.02563e+06	3938930	T	113	1	0.321948	0.109481	70524.7	LQADDFLQDYTLLINILHSEDLGKDVEFEVVGDSPEKVGPK|VLVVGAGGIGCELLK|YLFNQLFGEEDADQEVSPDRADPEAAWEPTEAEAR|QFILVMNALDNR|MCLAADVPLIESGTAGYLGQVTTIKK|VHLAEKGDGAELIWDKDDPPAMDFVTSAANLR|NTPSEPIHCIVWAK|KLSDFGIR|GVTECYECHPKPTQR|STGYDPVKLFTK|TIFLNKQPNPR|YLLTMDKLWR|MHIFSMNMK|LSDFGIR|ELAEAVSGGR|DQQVLDVK|LLVPCALDPPNTNCYVCASKPEVTVR|SYASLFSK	ESVLQFHPQANIEAHHDSIMNPDYNVEFFR	0.5047	0	20.1696	0
Q9JMH6	Txnrd1	Mus musculus	Thioredoxin reductase 1, cytoplasmic	2	2	0.0783211	0.810616	178980	190871	189899	207674	275701	196266	249363	T	4	1	0.321396	-0.30291	67042	FLIATGERPR|TIGLETVGVK		0.03263	0.000503778	9.11532	5.37324e-05
Q9CQV5	Mrps24	Mus musculus	Small ribosomal subunit protein uS3m	1	1	0.0785112	1.78039	111129	124570	145417	39104.3	72673.1	107013	83184.6	T	2	1	0.321788	0.832195	18888.9	KGWLSLHTGNLDGEDHAAER		0.11976	0	12.149	0
Q9D8T7	Slirp	Mus musculus	SRA stem-loop-interacting RNA-binding protein, mitochondrial	4	4	0.0786506	0.8197	652734	463447	512943	695172	623075	672735	633838	T	24	1	0.321296	-0.286833	12597.5	GMGWVQFSSQEELQNALQQEHHIIDGVK|SSTGRPIAFVR|RCTVPFDKETGFHR|EHFAQFGHVR		0.5625	0	12.0798	0
Q9DC69	Ndufa9	Mus musculus	NADH dehydrogenase [ubiquinone] 1 alpha subcomplex subunit 9, mitochondrial	1	1	0.0787578	2.70551	160386	104184	172222	45620.2	52960.3	136454	23173	T	2	1	0.320937	1.4359	42498.4	WLSSEIEETKPAK		0.03448	0	10.1116	0
O08582	Gtpbp1	Mus musculus	GTP-binding protein 1	6	6	0.0788116	1.2808	694261	784790	786997	466603	557993	682023	676655	T	20	1	0.320187	0.357043	72255	LVLVSPTSEQYDSLLR|VAVVGNVDAGK|VITFIDLAGHEK|LLQTTNNSPMNSKPQQIK|VGDNDFLEVR|QTATILSMDKDCLR		0.12126	0	13.3372	0
Q80U93	Nup214	Mus musculus	Nuclear pore complex protein Nup214	9	9	0.0788463	1.22235	1.90366e+06	1.51834e+06	1.44725e+06	1.19968e+06	1.2545e+06	1336580	1.50089e+06	T	27	1	0.319646	0.289663	212847	FAVQDVNDVLDLEWDRHLEQK|TPHAVLTPVANSQAK|LNQLVDSLQQLR|TVPQVVNVQELR|DSDPVLAGIGEEIAHFQK|TLELISTEGERQPK|IFDSPEELPKER|SSVLTISNK|TESDDLHTFLFEIR		0.06091	0	17.2016	0
Q3UGR5	Hdhd2	Mus musculus	Haloacid dehalogenase-like hydrolase domain-containing protein 2	1	1	0.0793497	0.751127	47673.5	69313.7	48143.5	72223	85745.1	70817.1	61749.8	T	1	1	0.321423	-0.412871	28712.1	LLLDGAPLIAIHK		0.05019	0.00335731	8.10147	0.000312806
P39054	Dnm2	Mus musculus	Dynamin-2	12	5	0.0794153	1.21043	501848	573192	599565	400423	426837	517661	505463	T	49	1	0.320826	0.275522	98084.1	TLNQQLTNHIR|GMEELIPLVNK|IVTTYIR|TGLFTPDLAFEAIVKK|ESLPTLR	GISPVPINLR|KFFLSHPAYR|SSVLENFVGRDFLPR|YMLPLDNLK|GYIGVVNR|EVDPQGLR|FFLSHPAYR	0.12874	0.000503778	9.21154	4.14662e-05
P58064	Mrps6	Mus musculus	Small ribosomal subunit protein bS6m	1	1	0.079485	2.46886	156461	204936	238322	112401	49077.5	173617	42301.5	T	4	1	0.320398	1.30385	14299.7	TIESLMDR		0.064	0.00289436	9.19406	0.00026185
Q8JZN5	Acad9	Mus musculus	Complex I assembly factor ACAD9, mitochondrial	1	1	0.0795702	0.724005	117857	192303	140048	186927	250389	182972	198239	T	7	1	0.319852	-0.465928	68678.7	FFTEEVDSR		0.0144	0.000503778	9.1041	4.14662e-05
Q8BVE3	Atp6v1h	Mus musculus	V-type proton ATPase subunit H	1	1	0.0795968	2.12152	213792	165180	191489	43145.2	93866.3	173517	89829	T	1	1	0.319152	1.0851	55819.1	GAVDAAVPTNIIAAK		0.03106	0	14.2473	0
Q9DCJ5	Ndufa8	Mus musculus	NADH dehydrogenase [ubiquinone] 1 alpha subcomplex subunit 8	4	4	0.0799999	1.32048	555825	530315	449224	307041	461463	445004	352068	T	10	1	0.32092	0.401058	19979.1	PGIVELPTLEELKVEEVK|FDQCVLDKLGWVRPDLGQLSK|VKTDRPLPENPYHSR|ARPEPNPVIEGDLKPAK		0.41279	0	16.3398	0
Q8CFE4	Scyl2	Mus musculus	SCY1-like protein 2	20	19	0.0800344	0.624648	2.56751e+06	2.90784e+06	2.4348e+06	5885328	5449755	2.80532e+06	3489181	T	109	1	0.320431	-0.678884	103251	YGLLQVSEGLSFLHSSVK|VTADVTSAVMGNPVTR|STKQEVAVFVFDKK|LLLNVTPTVRPDADQMTK|HIASGGNGLAWK|SQQPLKPQVHTPIAPIKQTK|QEVAVFVFDKK|LEQLHVMQEQQR|LGSSSLTSIPEEVREHVK|VFNNIGADLLSGSESENREDGMQGK|ISASSTFTPVPSTGLGMMFSTPIDNTKR|GSLTLEEK|LYDVETK|LLTVQHPLEESR|TKLEQLHVMQEQQR|GVQQLTR|LILPELGPVFK|TPPDEIKNSVLPMVYR|GSLTLEEKQK	MVHGNVTPENVILNK	0.28065	0	17.3075	0
P02538	KRT6A	Homo sapiens	Keratin, type II cytoskeletal 6A	30	1	0.0807019	0.47625	342436	543449	415949	1.30071e+06	1.55962e+06	573681	551010	C	284	1	0.32281	-1.07021	60008.3	SGFSSVSVSR	ISIGGGSCAISGGYGSR|LALDVEIATYR|GSGGLGGACGGAGFGSR|NLDLDSIIAEVK|SRAEAESWYQTKYEELQVTAGR|TLNNKFASFIDKVR|SRGSGGLGGACGGAGFGSR|NKYEDEINKR|FASFIDKVR|LALDVEIATYRK|ADTLTDEINFLR|WTLLQEQGTK|TAAENEFVTLKK|KLLEGEECR|QLDSIVGER|SRAEAESWYQTK|NKLEGLEDALQK|YEELQVTAGR|RQLDSIVGER|AQYEEIAQR|LLEGEECR|GRLDSELR|QNLEPLFEQYINNLRR|ASTSTTIR|FLEQQNK|SLYGLGGSKR|FASFIDK|ALYDAELSQMQTHISDTSVVLSMDNNR|QEIAEINR	0.48227	0	16.5471	0
Q8CD92	Ttc27	Mus musculus	Tetratricopeptide repeat protein 27	6	6	0.0811329	1.2908	906129	917028	829492	612807	659424	597944	907662	T	10	1	0.324384	0.368269	96369.3	SIPQEAVQTLSSVR|AIGLAHVAMK|YVNIHQQLLEER|SPQLFALAK|QTQALADQFEDKATSVLER|VTNDGEVWR		0.08619	0	10.1463	0
Q9CZX0	Elp3	Mus musculus	Elongator complex protein 3	9	9	0.0815061	1.32214	1.09577e+06	1489343	1.45076e+06	895768	879152	1259410	1.0412e+06	T	38	1	0.325476	0.40288	62345	DIPMPLVSSGVEHGNLR|MAVISGVGTR|ILALVPPWTR|YGLASQPR|AACESFHLAK|SLHDALSGHTSNNIHEAIK|YDPFLQTR|QLVEAHEQGKDVDLNK|QLVEAHEQGKDVDLNKMK		0.18282	0	14.1486	0
Q9CRC8	Lrrc40	Mus musculus	Leucine-rich repeat-containing protein 40	9	9	0.0819341	1.28596	1.40517e+06	1.46388e+06	1.14433e+06	889769	927205	1.27135e+06	1.09165e+06	T	21	1	0.327382	0.362846	68033.1	TLHLQHNELTCIPEGFEHLSCLEDLDLSSNR|SVPEEMALLQSLER|LIISSNKLQSLSDDLR|LNLSSNQLK|FLALEGNPLR|ILPEEITSLK|NLPAEISR|TLLLDGNPFRVPR|VLPEFPSCR		0.19934	0	15.1385	0
P50580	Pa2g4	Mus musculus	Proliferation-associated protein 2G4	20	20	0.0821901	1.39	4.94595e+06	6.23213e+06	5334050	3125602	3.31134e+06	5.02487e+06	4639446	T	116	1	0.327891	0.475087	43671.2	HELLQPFNVLYEKEGEFVAQFK|LVKPGNQNTQVTEAWNK|VAHSFNCTPIEGMLSHQLK|ITSGPFEPDLYKSEMEVQDAELK|SGEDEQQEQTIAEDLVVTK|AAHLCAEAALR|FTVLLMPNGPMR|TIIQNPTDQQK|RFDAMPFTLR|FDAMPFTLR|MGGDIANR|HELLQPFNVLYEK|ALLQSSASR|MGVVECAK|KGIAFPTSISVNNCVCHFSPLK|AFFSEVERR|TIIQNPTDQQKK|AFFSEVER|EGEFVAQFK|SDQDYILKEGDLVK		0.54315	0	19.3015	0
Q9Z2I9	Sucla2	Mus musculus	Succinate--CoA ligase [ADP-forming] subunit beta, mitochondrial	8	8	0.0823732	1.27982	1.45251e+06	1430371	1.45694e+06	897308	1.07999e+06	1.42425e+06	1.1825e+06	T	34	1	0.32771	0.355942	50082.1	ILACDDLDEAAK|INFDSNSAYR|SSDEAYAIAK|EQAVTLAQK|IVFSPEEAK|AVSSQMIGQK|ALIADSGLK|LYNLFLK		0.16415	0	12.3235	0
Q9CPV4	Glod4	Mus musculus	Glyoxalase domain-containing protein 4	3	3	0.08275	0.747282	258363	263838	268670	383463	468261	293918	293318	T	11	1	0.328668	-0.420276	33295.5	ESHSILTPLVSLDTPGK|SLNYWSNLLGMK|SPSQSDPVLK		0.13087	0	15.1175	0
Q9ESV0	Ddx24	Mus musculus	ATP-dependent RNA helicase DDX24	2	2	0.0831521	1.34503	178530	130531	191496	103895	119630	152877	118144	T	3	1	0.329757	0.427636	96368.6	SESLAQAAPR|VQHVIHYQVPR		0.0245	0	10.3375	0
Q99L48	Nmd3	Mus musculus	60S ribosomal export protein NMD3	9	9	0.0831943	1.18304	1.03125e+06	1.23451e+06	996459	892497	834252	1.03912e+06	906120	T	19	1	0.329213	0.242502	57574	TSEMNTDKQYFCR|THLGHLLNPGDLVLGFDLANCNLNDEYVNK|DATIPVESDTDDEGAPR|KHTLGEVWIQK|LISQDIHSNTYNYK|SKVDISQGVPK|MVEFLQGIVPCR|QVSISFCK|STFSVEIVPICKDNVVCLSPK		0.27237	0	14.2399	0
P84228	H3c2	Mus musculus	Histone H3.2	8	1	0.0832171	1.52868	1.85338e+06	2.15121e+06	2930357	1.26656e+06	1.1465e+06	1.5791e+06	2.11713e+06	T	48	1	0.328475	0.612286	15378.5	FQSSAVMALQEASEAYLVGLFEDTNLCAIHAK	EIAQDFKTDLR|STELLIR|STELLIRK|YRPGTVALR|YRPGTVALREIR|DIQLARR|EIAQDFK	0.51471	0	13.4371	0
P47915	Rpl29	Mus musculus	Large ribosomal subunit protein eL29	10	10	0.0832519	1.44958	13094503	8.22744e+06	11582954	6.71709e+06	6145211	10046217	7.33741e+06	T	95	1	0.327839	0.535634	17575.9	AQASAPAQAPK|YESLKGVDPK|AGAKAPAKAQASAPAQAPK|ALVKPQAIKPK|GAQAPVKAP|SQRYESLKGVDPK|LAFIAHPK|SQRYESLK|PQAIKPK|LCQPKPK		0.41875	0	13.3278	0
Q9CQ75	Ndufa2	Mus musculus	NADH dehydrogenase [ubiquinone] 1 alpha subcomplex subunit 2	2	2	0.0834874	0.704847	358563	456059	361177	740686	612601	418333	490941	T	13	1	0.328018	-0.504618	10908.8	TVSLNNLSADEVTR|AMQNVLSGKA		0.24242	0	13.2593	0
Q9DC70	Ndufs7	Mus musculus	NADH dehydrogenase [ubiquinone] iron-sulfur protein 7, mitochondrial	2	2	0.0839996	1.32423	506274	410159	421983	288138	323833	448720	302290	T	12	1	0.329612	0.405155	24666.8	AGAGAVVPK|PSPSPSPSLSSTQSAVSK		0.12054	0	12.3266	0
Q91VR5	Ddx1	Mus musculus	ATP-dependent RNA helicase DDX1	28	28	0.0843742	1.18136	3.74028e+06	3.27961e+06	3.80335e+06	2743664	2.79997e+06	3.46439e+06	3.24002e+06	T	94	1	0.330747	0.240451	82447.8	IMHFPTWVDLKGEDSVPDTVHHVVVPVNPK|GHVDVLAPTVQELAALEK|ALIVEPSRELAEQTLNNVK|TGAFSIPVIQIVYETLKDQQEGK|GIDIHGVPYVINVTLPDEKQNYVHR|HYYEVSCHDQGLCR|FLICTDVAAR|EAQTSFLHLGYLPNQLFR|ELLIIGGVAAR|GIDIHGVPYVINVTLPDEK|NGKDLGLAFEIPAHIK|DLGLAFEIPAHIK|GKHYYEVSCHDQGLCR|NQALFPACVLK|WQMNPYDR|LRELLIIGGVAAR|APDNYIVK|VGWSTMQASLDLGTDKFGFGFGGTGKK|TDKLWER|DGFVALSK|TGASVLNK|ELAEQTLNNVK|LNLSQVR|FLPNAPK|KYIDNPKLR|ALIVEPSR|MHNQIPQIT…		0.41757	0	18.2284	0
Q8JZX4	Rbm17	Mus musculus	Splicing factor 45	9	9	0.0848422	0.73006	1.32245e+06	1.01082e+06	1.23012e+06	1.81828e+06	2.06448e+06	1.42999e+06	1.2728e+06	T	51	1	0.331344	-0.453913	45276	IIVGDATEKGEAQDASK|TKQSTVLAPVIDLK|LLQSQLQVK|EGQGLGKHEQGLSTALSVEK|QSTVLAPVIDLK|ACFYNLDKFR|LLQSQLQVKK|TKQSTVLAPVIDLKR|AVVDLNGR		0.19753	0	13.2106	0
P48024	Eif1	Mus musculus	Eukaryotic translation initiation factor 1	2	1	0.0855738	0.658973	412335	318594	474350	553001	908358	555634	469397	T	18	1	0.334478	-0.601709	12738.6	SAIQNLHSFDPFADASKGDDLLPAGTEDYIHIR	TLTTVQGIADDYDKKK	0.43363	0	25.3425	0
Q91YT7	Ythdf2	Mus musculus	YTH domain-containing family protein 2	5	3	0.0857828	1.33468	1.32698e+06	913657	1.12197e+06	744225	698918	1.00746e+06	906375	T	28	1	0.334243	0.416492	62241.7	SASSLLEQRPK|LGSTEVASSVPK|HNMDIGTWDNKGPVAK	DTQEVPLEK|RLDAAYR	0.09499	0	16.1973	0
Q8VCE2	Gpn1	Mus musculus	GPN-loop GTPase 1	1	1	0.0858854	1.81259	157381	93936.1	108405	48714	41841.4	92563	92091.2	T	1	1	0.333797	0.85805	41571.6	SLANAQSNQQKEQLER		0.04301	0.00243072	8.19857	0.000126598
Q60668	Hnrnpd	Mus musculus	Heterogeneous nuclear ribonucleoprotein D0	13	11	0.086073	1.23825	2.6714e+06	3.34512e+06	2.50261e+06	2.54507e+06	2356828	2.30539e+06	1.93815e+06	T	83	1	0.333899	0.308303	38330.3	IFVGGLSPDTPEEK|FGEVVDCTLKLDPITGR|IREYFGGFGEVESIELPMDNKTNK|IREYFGGFGEVESIELPMDNK|GFCFITFKEEEPVKK|ESESVDKVMDQKEHK|HTEAAAAQREEWK|YHNVGLSK|IFVGGLSPDTPEEKIR|DLKDYFSK|LDPITGR	SRGFGFVLFK|GFGFVLFK	0.3493	0	16.3758	0
P51863	Atp6v0d1	Mus musculus	V-type proton ATPase subunit d 1	1	1	0.0861005	1.24678	137862	176940	143065	101927	119564	140876	127600	T	1	1	0.333254	0.318209	40275.2	LYPEGLAQLAR		0.03134	0.00289436	8.17902	0.000301882
P56391	Cox6b1	Mus musculus	Cytochrome c oxidase subunit 6B1	6	6	0.0863449	0.574524	747409	681480	952991	1.72014e+06	2.19159e+06	960924	966548	T	33	1	0.333462	-0.799562	10064.9	NCWQNYLDFHR|GGDVSVCEWYR|TAPFDSRFPNQNQTK|TAPFDSR|IAEGTFPGKI|GGDVSVCEWYRR		0.55814	0	14.2622	0
P23116	Eif3a	Mus musculus	Eukaryotic translation initiation factor 3 subunit A	73	71	0.0865528	1.11828	17804248	15250189	16506294	15139100	14622699	15718914	13578371	T	488	1	0.333441	0.16128	161838	HHNQSTAINLNNPESQSMHLETR|ALEVIRPAHILQEKEEQHQLAVNAYLK|VKDMDLWEQQEEERITTMQLER|LLQQVAQIYQSIEFSR|VLLATLSIPITPERTDIAR|AFKDIDIEDLEELDPDFIMAK|LLDMDGIIVEK|VLLATLSIPITPER|NQLTAMSSVLAK|KPPKPQLMANYYNK|SGNALFHASTLHR|RGPAEESSSWR|ILQEHEQIK|KGPEADSEWR|KQPALDVLYDVMK|RGPDEDRFSR|RGLDDDRGPWR|RGPPEKEWR|AKRLEEIPLIK|RGLDDDRGPR|RGTDDDRPSWR|FSVLQYVVPEVK|PAYFQRPENALKR|LATLLGLQAPPTR|AREESWGPPR|TKNETDEDGWTTVRR|RGADDDRGPWR|E…	MLEDRDLFVMR|RGMDDDRGPR	0.48363	0	20.2479	0
P58468	Slx9	Mus musculus	Ribosome biogenesis protein SLX9 homolog	5	5	0.0867748	0.700365	555271	458292	749166	885038	1.05109e+06	709406	691041	T	21	1	0.334126	-0.513821	24798.7	AAVRPDGDSAPGPVPR|AMVVVGDLHPLRDALPELQELEAGR|DWTFVHNDIFAR|LLASPTYR|VTSKPRPVELSR		0.33333	0	12.3257	0
P29341	Pabpc1	Mus musculus	Polyadenylate-binding protein 1	46	41	0.0868572	1.27588	29636806	23589476	24987962	18466104	17427186	25465948	20872302	T	454	1	0.333887	0.351494	70625.9	ITGMLLEIDNSELLHMLESPESLR|SLGYAYVNFQQPADAER|KEFSPFGTITSAK|RSLGYAYVNFQQPADAER|SKVDEAVAVLQAHQAK|IVATKPLYVALAQR|SKGFGFVCFSSPEEATK|KSGVGNIFIK|GFGFVCFSSPEEATK|NFGEDMDDERLKELFGK|HEDAQKAVDEMNGKELNGK|AVPNPVINPYQPAPPSGYFMAAIPQTQNR|GYGFVHFETQEAAER|SGVGNIFIK|LFPLIQAMHPSLAGK|IVATKPLYVALAQRK|EFSPFGTITSAK|FSPAGPILSIR|AVDEMNGKELNGK|GFGFVSFERHEDAQKAVDEMNGK|VDEAVAVLQAHQAK|NLDDGIDDERLR|NLDDGIDDER|GFGFVSFER|NPQQHLNA…	VANTSTQTMGPRPAAAAAAATPAVR|QAHLTNQYMQR|ALDTMNFDVIK|MNGMLLNDRK|YQGVNLYVK	0.69654	0	22.3308	0
P27773	Pdia3	Mus musculus	Protein disulfide-isomerase A3	19	19	0.0872847	0.656263	4.02473e+06	5.75254e+06	6371893	6562365	10514829	6.19724e+06	9827647	T	137	1	0.335011	-0.607655	56642.7	KTFSHELSDFGLESTTGEVPVVAIR|ALEQFLQEYFDGNLKR|FISDKDASVVGFFR|SDVLELTDENFESR|IFRDGEEAGAYDGPR|TFSHELSDFGLESTTGEVPVVAIR|ELNDFISYLQR|LSKDPNIVIAK|LAPEYEAAATR|GFPTIYFSPANK|YGVSGYPTLK|EATNPPIIQEEKPK|FVMQEEFSR|DLFSDGHSEFLK|QAGPASVPLRTEEEFKK|AASNLRDNYR|DGEEAGAYDGPR|KFLDAGHKLNFAVASR|SEPIPESNEGPVK		0.45545	0	19.3857	0
Q8CEC0	Nup88	Mus musculus	Nuclear pore complex protein Nup88	9	9	0.0874096	1.1762	1.50341e+06	1.33539e+06	1343017	1.10471e+06	1.04008e+06	1.32291e+06	1.28997e+06	T	30	1	0.334537	0.234138	84883.5	SSEKDLAPPPEECLQLISR|HAAWYPSEMLDPHIVLLTSDNVIR|LLCINPPLFEIHQVLLSPTQHHVALIGSK|ELQLIPDQLR|SAANPAFLK|GLMALELPQR|VLSPQKPTITLSAYQR|ILAETPDSFEK|IYSLREPQTPTK		0.18592	0	14.0842	0
Q8K4Z5	Sf3a1	Mus musculus	Splicing factor 3A subunit 1	3	3	0.0875889	0.75214	200258	255597	231746	387395	270992	244960	328706	T	6	1	0.334894	-0.410926	88489.4	LTAQFVAR|VMQQQQQATQQQLPQK|VTWDGHSGSMAR		0.04551	0.00243072	8.16419	0.00020326
P21107	Tpm3	Mus musculus	Tropomyosin alpha-3 chain	13	7	0.0879629	0.842477	910029	703488	787926	986835	1.02548e+06	838239	939633	T	107	1	0.335922	-0.247291	32973.8	ALKDEEKMELQEIQLK|HIAEEADRKYEEVAR|AADAEAEVASLNR|KLVIIEGDLER|KLVIIEGDLERTEER|ILTDKLKEAETR|AADAEAEVASLNRR	LATALQKLEEAEKAADESER|RIQLVEEELDRAQER|IQLVEEELDRAQER|LATALQKLEEAEK|LEEAEKAADESER|EAETRAEFAER	0.39298	0	21.22	0
P62960	Ybx1	Mus musculus	Y-box-binding protein 1	13	7	0.0887959	1.4346	2995466	2.41163e+06	2.59183e+06	1791198	1.38758e+06	2.69023e+06	1.7555e+06	T	76	1	0.338546	0.520645	35708.6	NYQQNYQNSESGEKNEGSESAPEGQAQQR|SSEAETQQPPAAPAAALSAADTKPGSTGSGAGSGGPGGLTSAAPAGGDKK|AADPPAENSSAPEAEQGGAE|EDGNEEDKENQGDETQGQQPPQRR|YAADRNHYR|EDGNEEDKENQGDETQGQQPPQR|QPREDGNEEDKENQGDETQGQQPPQR	RPQYSNPPVQGEVMEGADNQGAGEQGRPVR|NDTKEDVFVHQTAIK|NGYGFINRNDTKEDVFVHQTAIK|NGYGFINR|NDTKEDVFVHQTAIKK|EDVFVHQTAIKK	0.58696	0	23.34	0
P70670|Q60817	Naca|Naca	Mus musculus	Nascent polypeptide-associated complex subunit alpha, muscle-specific form|Nascent polypeptide-associated complex subunit alpha	4	0	0.0890583	0.79462	878924	1191736	1.14447e+06	1.35003e+06	1.59017e+06	1.20181e+06	1237997	T	20	2	0.339416	-0.331663	220364.3543993704|23369.71176570234		SPASDTYIVFGEAK|IEDLSQQAQLAAAEK|NILFVITKPDVYK|NILFVITKPDVYKSPASDTYIVFGEAK	0.0192|0.19535	0	16.2059	0
Q7TMY8	Huwe1	Mus musculus	E3 ubiquitin-protein ligase HUWE1	19	19	0.0892692	1.26563	2.01931e+06	2.55724e+06	1.78669e+06	1724443	1.39441e+06	1.80595e+06	1.73672e+06	T	54	1	0.339332	0.339854	482332	HASSGSTVHIHPQAAPVVCR|IVNQPSSLFGSK|LFGHSSTSALSAILR|DSAVAISGADSR|LLVGNDDVHIIAR|DGGSGNSTIIVSR|VLLSPDYLPAMR|GSKSPAKVGEGGSGIDFK|VGEGGSGIDFK|HVLDTLIQLAK|VPHSLDLSSPNMANTVNAALKPLETLSR|TLTSIVHLER|GLVNDLAR|AALPLTTSDTK|VFPSHFTQQR|TQHNGMNNIIR|LDEGLRKEDMAVHVR|TVLNQILR|EVLQNQLGIRPPTR		0.05506	0	17.1875	0
Q62441	Tle4	Mus musculus	Transducin-like enhancer protein 4	3	1	0.0896933	1.40856	105247	69758.3	70967	49677.4	46747	65573.6	69943.4	T	11	1	0.340419	0.494216	83734.8	SPVVGFDPHHHMR	TPYGASIFQSK|LWTGGLDNTVR	0.04528	0	13.1191	0
P67778	Phb1	Mus musculus	Prohibitin 1	22	22	0.0897346	1.13423	18570572	21320972	18997146	16860042	15798125	19205788	17406922	T	228	1	0.339753	0.181717	29801.9	AATFGLILDDVSLTHLTFGKEFTEAVEAK|AAELIANSLATAGDGLIELR|KLEAAEDIAYQLSR|GVQDIVVGEGTHFLIPWVQKPIIFDCR|NVPVITGSKDLQNVNITLR|IYTSIGEDYDERVLPSITTEILK|ILFRPVASQLPR|FDAGELITQR|DLQNVNITLR|KAAIISAEGDSK|AAIISAEGDSK|SRNITYLPAGQSVLLQLPQ|IYTSIGEDYDER|VLPSITTEILK|FVVEKAEQQK|FVVEKAEQQKK|EFTEAVEAK|NVPVITGSK|FGLALAVAGGVVNSALYNVDAGHR|QVSDDLTER|VFESIGK|NITYLPAGQSVLLQLPQ		0.86397	0	22.1801	0
O08709	Prdx6	Mus musculus	Peroxiredoxin-6	13	13	0.0901419	1.1093	3204292	3.16859e+06	2.91535e+06	2506552	2.94078e+06	2.87467e+06	2.85363e+06	T	72	1	0.340732	0.149648	24855	PGGLLLGDEAPNFEANTTIGR|FHDFLGDSWGILFSHPR|KGESVMVVPTLSEEEAKQCFPK|IRFHDFLGDSWGILFSHPR|LIALSIDSVEDHLAWSK|VVDSLQLTGTKPVATPVDWK|DFTPVCTTELGR|KGESVMVVPTLSEEEAK|LSILYPATTGR|NFDEILR|VVFIFGPDKK|LPFPIIDDKGR|LAPEFAK		0.70089	0	21.3706	0
Q80TR8	Dcaf1	Mus musculus	DDB1- and CUL4-associated factor 1	5	5	0.090224	1.13192	461884	412830	430311	407973	348586	419241	364294	T	13	1	0.340824	0.178768	168824	GLGETATVLTR|YAAELIER|HSFTEDHYVEFSK|IANGIASR|TFNATDYKPIATIDVKR		0.03785	0	12.2484	0
Q8VBV3	Exosc2	Mus musculus	Exosome complex component RRP4	1	1	0.090671	0.680464	43397	61613.1	75193.5	97536.1	65049.1	82466.7	104998	T	5	1	0.341949	-0.55541	32611	SAEDELAMR		0.03072	0.00567644	8.08116	0.000416551
Q9Z1X4	Ilf3	Mus musculus	Interleukin enhancer-binding factor 3	12	11	0.0910081	1.33162	2725598	2.364e+06	3.05671e+06	1.73466e+06	1.67055e+06	2.53521e+06	2.30251e+06	T	54	1	0.342994	0.413188	95961.3	HSSVYPTQEELEAVQNMVSHTER|VLQDMGLPTGAEGR|QQREDITQSAQHALR|LISQTGPVHAPIFTMSVEVDGSNFEASGPSKK|VLGMDPLPSK|AYAALAALEK|LNQLKPGLQYK|LFPDTPLALEANKK|IFVNDDRHVMAK|LAAFGQLHK|NTEHSMNYQYR	GLKYELISETGGSHDKR	0.19822	0	19.199	0
P63321|Q9JIW9	Rala|Ralb	Mus musculus	Ras-related protein Ral-A|Ras-related protein Ral-B	2	0	0.0912745	0.610576	112775	223497	281462	284189	314441	307718	356679	T	7	2	0.343198	-0.711756	23537.956446053577|23334.915275003255		VIMVGSGGVGK|ANVDKVFFDLMR	0.11165|0.11165	0	10.1459	0
Q8BU14	Sec62	Mus musculus	Translocation protein SEC62	3	3	0.0917618	0.754036	361972	282262	246455	428170	466458	338116	338086	T	4	1	0.344808	-0.407295	45552.1	IQEVGEPSKEEK|VDYFIASK|ESVVDYCNR		0.07286	0.0061263	8.11961	0.00058696
Q6PIP5	Nudcd1	Mus musculus	NudC domain-containing protein 1	3	3	0.0917938	1.24542	424577	511516	598217	363328	415058	386407	469377	T	10	1	0.344185	0.316628	66662.4	VISGDQDLEENMDEDRPEK|LFVLTTK|LKDIQVLEGK		0.06186	0.00289436	9.22637	0.000250351
Q3TIU4	Pde12	Mus musculus	2',5'-phosphodiesterase 12	2	2	0.0919556	2.14076	293955	230130	223386	68464.9	69065.6	217454	172998	T	7	1	0.34405	1.09813	67471	LGVEFGDPASSVFR|YIMAGFPVCPK		0.04112	0	11.2416	0
Q99J36	Thumpd1	Mus musculus	THUMP domain-containing protein 1	4	4	0.0920084	1.42929	247136	315086	264858	253660	164653	228234	142173	T	5	1	0.343448	0.5153	38860.8	RFQSVESGANNVVFIR|TLGIEPEKLVHHILQDMYK|YNLQEVVK|SQFLPAKR		0.14571	0	12.0704	0
Q9R0Q7	Ptges3	Mus musculus	Prostaglandin E synthase 3	5	5	0.0920731	0.59009	943563	959268	579176	1349105	1.98927e+06	844404	1.53839e+06	T	44	1	0.342948	-0.760993	18709.4	HLNEIDLFHCIDPNDSK|LTFSCLGGSDNFK|KGESGQSWPR|SKLTFSCLGGSDNFKHLNEIDLFHCIDPNDSK|SILCCLR		0.30625	0	16.3138	0
Q8K2M0	Mrpl38	Mus musculus	Large ribosomal subunit protein mL38	2	2	0.0922226	1.40222	144068	172753	147073	122627	87130.6	90253.7	151313	T	3	1	0.342708	0.487717	45001.7	TASIPLEAVR|HQEAMTPAGLAFFQCR		0.06842	0	10.3024	0
Q61235	Sntb2	Mus musculus	Beta-2-syntrophin	7	7	0.0924013	1.24709	717420	850342	659417	511520	539061	699796	636278	T	19	1	0.342694	0.31856	56346.2	LGDAILSVNGTDLR|DAWASPCHSYPLVATR|QATHDQAVQALKR|VVKQEAGGLGISIK|AGLVELLLR|IFPGLAADQSR|LIELHSPDSR		0.16731	0	13.4429	0
Q8CFI7	Polr2b	Mus musculus	DNA-directed RNA polymerase II subunit RPB2	19	19	0.0931722	1.13763	2.60845e+06	2.28581e+06	2.58557e+06	2.32394e+06	2.38815e+06	2021361	2.04191e+06	T	50	1	0.345361	0.186034	133825	VSANKGEIGDATPFNDAVNVQK|KGFDQEEVFEKPTR|VSGDDVIIGK|TVIKEGEEQLQTQHQK|HAIYEKLDDDGLIAPGVR|ISNLLSDYGYHLR|AGVSQVLNR|ICRPLLIVEK|NLTYSAPLYVDITK|IPQIGDKFASR|LTFASTLSHLR|FGEMERDCQIAHGAAQFLR|NTYQSAMGK|TVTLPENEDELESTNRR|ARGPIQILNR|QEDMPFTCEGITPDIIINPHAIPSR|VLIAQEK|QEVPIIIVFR|SCLENSSRPTSTIWVSMLAR		0.22572	0	15.1981	0
Q62167	Ddx3x	Mus musculus	ATP-dependent RNA helicase DDX3X	41	10	0.0935809	1.07978	11187085	11912807	11614374	9930487	10593273	11092784	11287187	T	307	1	0.346377	0.110738	73056	TAAFLLPILSQIYADGPGEALR|VRPCVVYGGAEIGQQIR|QSSGASSSSFSSSR|SHVAVENALGLDQQFAGLDLNSSDNQSGGSTASK|GRGDYDGIGGRGDR|GFYDKDSSGWSSSK|VRPCVVYGGAEIGQQIRDLER|SSFFGDR|EATKGFYDKDSSGWSSSK|SSFFGDRGSGSR	KGADSLEDFLYHEGYACTSIHGDR|SFLLDLLNATGKDSLTLVFVETK|HVINFDLPSDIEEYVHR|VGNLGLATSFFNER|SGKSPILVATAVAAR|SPILVATAVAAR|HTMMFSATFPK|QEVPSWLENMAFEHHYK|VGSTSENITQK|GCHLLVATPGR|DLMACAQTGSGK|DLLDLLVEAK|MLDMGFEPQIR|RKQYPISLVLAPTR|DREEALHQFR|YLVLDEADRMLDMGFEPQIRR|QYPISLVLAPTR|DKDAYSSFGSR|ELAVQIYEEAR|YLVLDEADR|SGFGKFER|GLDISNVK|LVDMMER|FSGGFGAR|IVEQDTMPPKGVR|HAIPIIK|IGLDFCK|EIQMLAR|ELAVQIYEEARK|KQYPISLVLAPTR|DSL…	0.65408	0	26.3418	0
Q921M7	Cyrib	Mus musculus	CYFIP-related Rac1 interactor B	1	1	0.0940479	1.63493	131655	160829	204014	65161.5	133761	135094	83624	T	2	1	0.347149	0.709229	36752.7	VLKDQPPNSVEGLLNALR		0.05556	0	14.2888	0
Q5SSZ5	Tns3	Mus musculus	Tensin-3	1	1	0.0947821	1.31003	114471	156446	98127.7	89107.7	80256.2	99981.1	100702	T	1	1	0.350021	0.389598	155491	AGDLSNELVR		0.00694	0	11.2436	0
Q8BZX4	Srek1	Mus musculus	Splicing regulatory glutamine/lysine-rich protein 1	1	1	0.095069	0.539136	157314	147264	87843.1	266926	410236	155083	179741	T	3	1	0.350123	-0.891278	56729.7	FAFVEFADQNSVPR		0.02834	0	12.4182	0
P62830	Rpl23	Mus musculus	Large ribosomal subunit protein uL14	12	9	0.0954474	1.10487	9578562	8740626	8766318	8498630	8625305	8.21123e+06	7.38078e+06	T	185	1	0.350505	0.143878	14856.1	ISLGLPVGAVINCADNTGAK|LPAAGVGDMVMATVKK|FRISLGLPVGAVINCADNTGAK|GSAITGPVAKECADLWPR|GSAITGPVAK|KKVHPAVVIR|NLYIISVK|ECADLWPR|VHPAVVIR	LPAAGVGDMVMATVK|LNRLPAAGVGDMVMATVKK|LNRLPAAGVGDMVMATVK	0.55	0	22.3183	0
P61979	Hnrnpk	Mus musculus	Heterogeneous nuclear ribonucleoprotein K	25	23	0.0958264	0.876753	16403504	14432767	13942505	17591842	18783938	15878280	15852271	T	321	1	0.35082	-0.189757	50944.4	GSYGDLGGPIITTQVTIPK|HESGASIKIDEPLEGSEDRIITITGTQDQIQNAQYLLQNSVK|ALRTDYNASVSVPDSSGPER|TDYNASVSVPDSSGPER|LLIHQSLAGGIIGVK|RPAEDMEEEQAFKR|HESGASIKIDEPLEGSEDR|ILSISADIETIGEILKK|IIPTLEEGLQLPSPTATSQLPLESDAVECLNYQHYK|IITITGTQDQIQNAQYLLQNSVK|SRNTDEMVELR|IILDLISESPIK|IILDLISESPIKGR|IDEPLEGSEDRIITITGTQDQIQNAQYLLQNSVK|NLPLPPPPPPR|NTDEMVELR|LFQECCPHSTDRVVLIGGKPDR|GGDLMAYDR|GSDFDCELR|LFQECCPHSTDR|DLAGSIIGK|VVLI…	GGDLMAYDRR|DYDDMSPR	0.55724	0	21.2767	0
Q8BQZ5	Cpsf4	Mus musculus	Cleavage and polyadenylation specificity factor subunit 4	2	2	0.095866	0.61139	298987	286851	275217	494449	770625	441783	287871	T	3	1	0.350299	-0.709836	23637.5	SGAAVCEFFLK|GHLAFLSGQ		0.09479	0.000503778	9.10617	4.14662e-05
P62862	Fau	Mus musculus	Ubiquitin-like FUBI-ribosomal protein eS30 fusion protein	5	5	0.0960901	0.627767	3879096	4373729	4382666	7.82281e+06	10576425	4.53659e+06	5.36376e+06	T	105	1	0.350922	-0.671699	14406.8	FVNVVPTFGK|FVNVVPTFGKK|RFVNVVPTFGKK|RFVNVVPTFGK|KVHGSLAR		0.15038	0	14.34	0
P23881	Tcea3	Mus musculus	Transcription elongation factor A protein 3	5	5	0.0961435	0.771337	779290	947086	992940	1.45727e+06	1.0887e+06	1.24985e+06	941310	T	13	1	0.350354	-0.374568	38824.9	NVLSGAISPELIAK|TGGTTTDLLR|GLEEELLR|KKTEGALDLLK|IGVAVNGVR		0.14986	0	14.2427	0
Q05D44	Eif5b	Mus musculus	Eukaryotic translation initiation factor 5B	30	29	0.0962777	0.769649	4.36852e+06	4688330	5.21952e+06	7322513	7.35302e+06	5.40274e+06	4.9705e+06	T	172	1	0.350285	-0.377728	137532	HTHVQDGEAGGITQQIGATNVPLEAINEQTK|HLQAQGVEVPSKDSLPK|LKEGDTIIVPGVEGPIVTQIR|IPGMLIIDTPGHESFSNLR|HFEATDILVSK|NKSEDSTKDDTDLGALAAEIEGAGAAK|ALPGMGTTIDVILINGR|KSPDSDVAVTLKK|NFDRENVRIPGMLIIDTPGHESFSNLR|SVPTVDSGNEDDDSSFKIK|APIICVLGHVDTGK|TSFDENDSEELEDKDSK|HIAVFPCK|TSEVPYAGINIGPVHKK|ILPQYIFNSRDPIVIGVTVEAGQVK|ADRDAAAVKPTENNEEESASK|KGQEVCVKIEPIPGESPK|QGTPMCVPSK|SPDSDVAVTLKK|CPFIVALNKIDR|IEPIPGESPK|LRAPIICVLGHV…	TARPNSEAPLSGSEDADDSNKLSK	0.32813	0	26.1978	0
Q8K114	Ints9	Mus musculus	Integrator complex subunit 9	4	4	0.096582	1.33347	292248	440885	454133	287518	332991	245987	305068	T	5	1	0.350669	0.415191	74029.9	RAEVLALPFKR|LNFIQVSK|HGFSDIKVEDTAK|LLMEELVNFIER		0.06687	0	12.3409	0
Q9Z315	Sart1	Mus musculus	U4/U6.U5 tri-snRNP-associated protein 1	15	15	0.0968406	0.632134	2.22892e+06	1.7741e+06	3.32134e+06	4350609	5.09915e+06	3.06664e+06	2.85258e+06	T	100	1	0.350931	-0.661699	90830.4	EAGTKEEPVAADVINPMALR|ASSGDASSLSIEETNKLR|IKTLGEDDPWLDDTAAWIER|GLAAALLLCQNK|LGLKPLEVNAVKK|KLDEEALLKK|DKGVLQDGEDVLVNVNMVDKER|LQAQSLSSVGPR|LRQLQQLQQLR|RQDLYSAR|DSGEKVLEIVK|SLPSAVYCIEDK|GLLETTVQK|QLQQLQQLR|SMNANTITK		0.23201	0	19.4198	0
G5E870	Trip12	Mus musculus	E3 ubiquitin-protein ligase TRIP12	11	11	0.096922	1.26719	1.73768e+06	1.46545e+06	1.56225e+06	1.07812e+06	1.08752e+06	1.587e+06	1313815	T	30	1	0.350602	0.341634	223988	LSAQSNSNNIEPAR|SSFLASLNPK|FLHVFFSSPLPGEEPVGR|IIEAAHQVGEDEISLSTLGR|TCPFFFPFDTR|LQALLEAR|SVYHLEDIVR|TAGVSGLAR|TVNREELLKQAESVMQDLGSSR|QMLFYVTAFDRDR|GEEVTLSNPK		0.0716	0	11.4851	0
P62835|Q99JI6	Rap1a|Rap1b	Mus musculus	Ras-related protein Rap-1A|Ras-related protein Rap-1b	2	0	0.0971167	0.742482	306249	555092	395013	540105	565153	520134	565671	T	13	2	0.350379	-0.429572	20973.70796848805|20811.592738058607		SKINVNEIFYDLVR|LVVLGSGGVGK	0.13587|0.13587	0	14.4002	0
P62242	Rps8	Mus musculus	Small ribosomal subunit protein eS8	22	22	0.0976148	1.32598	61021324	40911068	41496276	30343158	32506256	41164328	38762148	T	250	1	0.351445	0.407063	24190.2	KYELGRPAANTK|IIDVVYNASNNELVR|ADGYVLEGKELEFYLR|NCIVLIDSTPYRQWYESHYALPLGR|ADGYVLEGKELEFYLRK|LDVGNFSWGSECCTR|ALRLDVGNFSWGSECCTR|QWYESHYALPLGR|ISSLLEEQFQQGK|ALRLDVGNFSWGSECCTRK|NCIVLIDSTPYR|YELGRPAANTK|LDVGNFSWGSECCTRK|TRIIDVVYNASNNELVR|LLACIASRPGQCGR|ADGYVLEGK|LTPEEEEILNKKR|LTPEEEEILNK|LTPEEEEILNKK|ELEFYLRK|LLACIASR|ELEFYLR		0.625	0	20.3475	0
Q8CCF0	Prpf31	Mus musculus	U4/U6 small nuclear ribonucleoprotein Prp31	8	8	0.0979062	0.911055	968299	880126	888821	982602	1.04576e+06	1.05954e+06	920565	T	34	1	0.352851	-0.13439	55395.3	IMGVAGGLTNLSK|YFSSMAEFLK|QVKPLPAPLDGQR|VDSFHESTEGK|SSGTASSVAFTPLQGLEIVNPQAAEKK|VGYELKDEIER|IEEYISK|KFDKWQEPPPVK		0.20842	0	12.0823	0
Q6PGB6	Naa50	Mus musculus	N-alpha-acetyltransferase 50	3	3	0.0980846	0.62885	193163	326261	340188	453092	607000	301692	459005	T	15	1	0.352882	-0.669213	19402	RIEPADAHVLQK|NLKVPSGQNAETQKTDN|IELGDVTPHNIK		0.2426	0.000503778	9.06815	4.14662e-05
Q62523	Zyx	Mus musculus	Zyxin	1	1	0.0994527	0.667548	105383	97576.7	110771	228409	180121	105277	138308	T	1	1	0.35692	-0.583057	60506.8	GPLSQAPTPAPK		0.02128	0	10.3915	0
P01030	C4	Bos taurus	Complement C4	2	2	0.0994785	0.559386	241560	160770	465433	604137	363883	495162	445065	C	2	1	0.356208	-0.838084	NaN	LGQYTSPVAK|ESRVQYTVCIWR		0.02391	0.00243072	8.15784	0.000191696
Q68FL6	Mars1	Mus musculus	Methionine--tRNA ligase, cytoplasmic	35	34	0.0996323	1.21361	8742429	11320498	10336352	8858567	6.93982e+06	9046000	8544234	T	212	1	0.356048	0.279301	101366	IGTVSPLFQKLENDQIENLR|GSPKPAAVEAVTAAGSQHIQTLTDEVTK|HIIATEYLNYEDGKFSK|LFVSEGSPGSLPVLAAAAR|HGNQYIQVNEPWKR|SSQHLFLDLPKLEK|LQQHPVLPVPGER|LVAHVSWELQHYHQLLEK|GLESLPPLKLQQHPVLPVPGER|AELLISTVGPEECVVPFLTRPK|IGTVSPLFQK|GFVLRDTVEQLR|QLALAEGKPIETPK|GRAELLISTVGPEECVVPFLTRPK|LENDQIENLR|RLEDWLGK|QPQPQPPPPEGR|TVPGSDWTPNAR|VLTHIDHSLSR|GIGVFGDMAK|AQKADKNQVAAEVAK|SSQHLFLDLPK|ILATSFICTLPAGHR|QLALAEGKPIETPKGK|ADKNQVAA…	FGGGQAKGSPKPAAVEAVTAAGSQHIQTLTDEVTK	0.38027	0	21.2391	0
Q5SFM8	Rbm27	Mus musculus	RNA-binding protein 27	10	9	0.0998516	0.800624	1.17836e+06	1.07881e+06	1.17174e+06	1.741e+06	1.56442e+06	1316611	1.15455e+06	T	40	1	0.355809	-0.320803	118479	LGHASTNQSDTSHLLNQTGGSSGEDCPVFSTPGHPK|TIYSSSNLKAPSK|LSQLQVEAAR|ALPGGGFIEEEKDELLQHFSATNQASK|SHDVQEVLKK|LSSGEDTTELR|LQLGTPPPLLAAR|AISGLEGPLTK|VVLEPESR	KAISSTEAVLNNR	0.1434	0	14.2322	0
P62270	Rps18	Mus musculus	Small ribosomal subunit protein uS13	26	24	0.10049	0.658127	29476710	35068932	54224016	72143416	70507520	50236128	44747572	T	417	1	0.357183	-0.603561	17707.9	RAGELTEDEVERVITIMQNPR|RAGELTEDEVER|KIAFAITAIK|YSQVLANGLDNKLREDLER|AGELTEDEVER|YSQVLANGLDNK|KADIDLTK|SLVIPEKFQHILR|KADIDLTKR|QYKIPDWFLNR|YSQVLANGLDNKLR|VLNTNIDGR|IPDWFLNR|YAHVVLRK|RKIAFAITAIK|YAHVVLR|ADIDLTKR|DGKYSQVLANGLDNK|IAFAITAIK|IAFAITAIKGVGR|VLNTNIDGRR|ADIDLTK|LREDLER|SLVIPEK	AGELTEDEVERVITIMQNPR|VITIMQNPR	0.69737	0	21.3463	0
P17742	Ppia	Mus musculus	Peptidyl-prolyl cis-trans isomerase A	13	2	0.101017	0.677743	5.91557e+06	9582830	9549985	9935924	14903101	9668002	14607473	T	195	1	0.358677	-0.561189	17959.9	MVNPTVFFDITADDEPLGR|KITISDCGQL	HTGPGILSMANAGPNTNGSQFFICTAK|VNPTVFFDITADDEPLGR|VSFELFADKVPK|SIYGEKFEDENFILK|VKEGMNIVEAMER|TEWLDGKHVVFGK|EGMNIVEAMER|IIPGFMCQGGDFTR|FEDENFILK|VSFELFADK|TEWLDGK	0.75	0	21.4342	0
Q9CPR5	Mrpl15	Mus musculus	Large ribosomal subunit protein uL15m	4	4	0.101022	1.29194	459701	567416	448540	353304	303397	470237	407493	T	16	1	0.357968	0.369543	33520.9	VSLANLKPSPNSR|FGYVLPDITKDELFR|YGFNEGHSFR|HQYQPLSLRR		0.16271	0	12.1868	0
O88532	Zfr	Mus musculus	Zinc finger RNA-binding protein	3	3	0.101863	1.27468	328504	265068	425865	246637	256361	288000	257224	T	4	1	0.361034	0.35014	116786	VSAIPTNMAAK|RMEEEQHHWDDRR|LVSDSLSEHEK		0.03259	0.000997009	9.16156	6.65894e-05
Q02614	Sap30bp	Mus musculus	SAP30-binding protein	1	1	0.102104	0.617125	84644.1	83674.3	86946.8	121351	252172	103480	114069	T	4	1	0.361496	-0.696365	33811.6	TTVISAVGTIVKK		0.04221	0	10.1683	0
P35601	Rfc1	Mus musculus	Replication factor C subunit 1	7	7	0.102145	1.39113	859798	623007	793670	407216	478317	670128	653941	T	10	1	0.361108	0.476256	125907	AALLSGPPGVGK|AVVAESLNNTSIK|QLQLDEDAELERQLHEDEEFAR|GFYTSGAAPSVSAR|AYNKEAHLTPYSLQVVK|LGPFDVTR|AKEESSYNETELLAAR		0.09019	0	14.28	0
Q99KG3	Rbm10	Mus musculus	RNA-binding protein 10	13	12	0.103258	0.755147	1.86548e+06	2.11195e+06	2.0164e+06	3.22542e+06	3.21139e+06	2.04255e+06	2.30403e+06	T	90	1	0.36502	-0.40517	103430	AHLSENELEALEKNDMEQMK|GFAFVEFSHLQDATR|LDQQALPLGGR|TYIPALEQSADGHKDTGASSK|SEAEQKLPLGTR|DGLGSDNIGSR|TINVEFAK|LACLLCR|CGVQNFK|INEDWLCNK|NSFQPISALRDDERR|RQFPSKEALIR	MLPQAATEDDIRGQLQSHGVQAR	0.1828	0	16.2022	0
P62855	Rps26	Mus musculus	Small ribosomal subunit protein eS26	5	5	0.10415	1.26791	2.52765e+06	3.05062e+06	3.40817e+06	2417745	1.85739e+06	2.52737e+06	2.66379e+06	T	60	1	0.367648	0.342453	13007.1	DISEASVFDAYVLPK|NIVEAAAVRDISEASVFDAYVLPK|LHYCVSCAIHSK|NIVEAAAVR|GHVQPIR		0.37391	0	17.4036	0
Q9QYJ0	Dnaja2	Mus musculus	DnaJ homolog subfamily A member 2	13	13	0.104581	1.20902	2.66173e+06	2.0135e+06	2.77876e+06	1.93238e+06	1.88304e+06	2.13547e+06	2.2069e+06	T	71	1	0.368992	0.273836	45716.6	IGLVEALCGFQFTFK|NVLCSACSGQGGK|DGNDLHMTYK|ILEVHVDKGMK|VSLEDLYNGK|VIEPGCVR|ELYDRYGEQGLR|GEGMPQYR|YGEQGLR|RGEDMMHPLK|VVRGEGMPQYR|GEGMPQYRNPFEK|ILEVHVDK		0.25485	0	17.2541	0
Q922Q8	Lrrc59	Mus musculus	Leucine-rich repeat-containing protein 59	12	12	0.104933	0.737324	3.30842e+06	3.07229e+06	2.69419e+06	4.54859e+06	5.49902e+06	3.42786e+06	3257337	T	91	1	0.369404	-0.439629	34855.8	DKLDGNELDLSLSDLNEVPVKELAALPK|LVNLQHLDLLNNR|LSTLPSDFCGLTHLVK|LVTLPVSFAQLK|WLDLKDNPLDPVLAK|NKLQQLPADFGR|LQQLPADFGR|ATVLDLSCNK|VAGDCLDEK|VAGDCLDEKQCK|HHEILQWVLQTDSQQ|DKLDGNELDLSLSDLNEVPVK		0.43322	0	21.2819	0
Q61191	Hcfc1	Mus musculus	Host cell factor 1	15	14	0.105608	1.13338	1.91538e+06	1700461	1.73366e+06	1.71577e+06	1.38449e+06	1.65171e+06	1.55305e+06	T	44	1	0.370763	0.180638	210306	IATGHGQQGVTQVVLK|GAPGQPGTILR|SPISVPGGSALISNLGK|AGHCAVAINTR|VAGINACGR|SLHSATTIGNK|GPLPAGTILK|SSTPAQLAFMR|SIMVAGELGAAR|TTNTPTVVR|VASSPVMVSNPATR|TQGVPAVLK|ITVAPGALER|LGHSFSLVGNK	NEKGYGPATQVR	0.0846	0	14.1601	0
Q9D024	Ccdc47	Mus musculus	PAT complex subunit CCDC47	2	2	0.106105	0.841512	143589	134219	122124	148520	163467	137525	186987	T	3	1	0.372	-0.248945	55808.3	IMNEEDPEKQR|LAQAWFNSHR		0.04348	0	10.0844	0
Q9QWV9	Ccnt1	Mus musculus	Cyclin-T1	1	1	0.106134	1.47854	41163.9	44988.7	38574.7	27956.7	17625.9	35725.8	35232.4	T	1	1	0.37138	0.564176	80547.5	HSHLQLPAGPVSK		0.01796	0.000997009	9.05447	5.37324e-05
Q61171	Prdx2	Mus musculus	Peroxiredoxin-2	10	9	0.106148	0.786969	4370209	6702605	6035467	7087744	8.14545e+06	6492774	6901220	T	80	1	0.370662	-0.345622	21765.1	SAPDFTATAVVDGAFKEIK|KEGGLGPLNIPLLADVTK|SLSQNYGVLKNDEGIAYR|LGCEVLGVSVDSQFTHLAWINTPR|SLSQNYGVLK|ASGNAQIGK|NDEGIAYR|SVDEALR|GLFIIDAK	QITVNDLPVGR	0.57576	0	18.1926	0
Q9Z1J3	Nfs1	Mus musculus	Cysteine desulfurase	1	1	0.106562	1.48335	93681.7	74970.8	59856.9	33313.1	57968.4	63081.7	53398.4	T	1	1	0.371382	0.568862	50538	VRVEALQSGGGQER		0.0305	0.00335731	8.10926	0.000301882
Q9D8Z1	Ascc1	Mus musculus	Activating signal cointegrator 1 complex subunit 1	1	1	0.106961	2.26857	97137.8	109928	161709	41370	130567	26563.2	54513.2	T	1	1	0.372301	1.18178	41253.8	ATVSAPSLLYK		0.0309	0.00567644	8.12952	0.000536279
P54276	Msh6	Mus musculus	DNA mismatch repair protein Msh6	54	53	0.107276	1.20386	19538886	21922602	18697420	17660726	13509004	18883538	16933404	T	392	1	0.373362	0.267669	150989	AGFDSDYDQALADIRENEQSLLEYLDKQR|HATAHSLVLVDELGR|VSGLLEEVAGGFTSK|VEQTETPEMMEAR|NRYQLEIPENFATR|YLLSLKEKEEETSGHTR|TLVAHYPPVQILFEK|GGDAAWSEAEPGSR|LANLPEEVIQK|IIDFLSALEGFK|VHVQFFDDSPTR|GSLSSCLQEGLIPGSQFWDATK|TLFSTHYHSLVEDYSK|GRFPDLTAELQR|GTQTYSVLDGDPSENYSR|ADEALSKDTAER|LANLINAEER|LANLPEEVIQKGHR|VYGVCFVDTSLGK|RATPILSETK|RRPDHPEFNPTTLYVPEEFLNSCTPGMR|SAAVSASSPEAK|YQLEIPENFATR|AIMYEETTYSK|KTGLITPK|QSTLYSFFP…	MNQSLQLFR	0.4433	0	20.1648	0
Q9R1C0	Taf7	Mus musculus	Transcription initiation factor TFIID subunit 7	2	2	0.107437	0.720274	203494	174560	231079	277705	404954	235274	232517	T	7	1	0.373182	-0.473382	39102.1	NKDDAPHELESQFILR|LVDLPCVTESLK		0.08211	0	14.0813	0
Q8VIJ6	Sfpq	Mus musculus	Splicing factor, proline- and glutamine-rich	31	28	0.1078	1.18351	7850713	6.40003e+06	5.62824e+06	5912225	5435673	5.59049e+06	5265894	T	222	1	0.374199	0.243075	75394.3	FGQGGAGPVGGQGPR|DKLESEMEDAYHEHQANLLR|RMEELHSQEMQK|CSEGVFLLTTTPRPVIVEPLEQLDDEDGLPEKLAQK|ALAEIAKAELDDTPMR|LFVGNLPADITEDEFKR|NLSPYVSNELLEEAFSQFGPIER|FAQHGTFEYEYSQR|ISDSEGFKANLSLLR|FATHAAALSVR|QHHAPYHQQHHQGPPPGGPGPR|YGEPGEVFINKGK|GIVEFASKPAAR|YGEPGEVFINK|QREMEEQMR|LFVGNLPADITEDEFK|AELDDTPMR|MEELHSQEMQK|LAQKNPMYQK|GFGFIKLESR|ISDSEGFK|SPPPGMGLNQNR|TEEKISDSEGFK|MPGGPKPGGGPGMGAPGGHPKPPHR|SLDEMEK|RREEEMMI…	AVVIVDDR|AVVIVDDRGR|MGYMDPR	0.46495	0	20.4214	0
Q7TMK9	Syncrip	Mus musculus	Heterogeneous nuclear ribonucleoprotein Q	19	19	0.107804	1.11143	4761093	4.17011e+06	4333674	4.15488e+06	3620228	4252597	3.89162e+06	T	126	1	0.373484	0.152422	69589.6	VAEKLDEIYVAGLVAHSDLDER|AIEALKEFNEDGALAVLQQFKDSDLSHVQNK|NLANTVTEEILEK|AIEALKEFNEDGALAVLQQFK|TGYTLDVTTGQR|LMMDPLTGLNR|VTEGLTDVILYHQPDDKKK|LKDYAFIHFDERDGAVK|KYGGPPPDSVYSGQQPSVGTEIFVGKIPR|GYAFVTFCTK|SAFLCGVMK|LFVGSIPK|TKEQILEEFSK|SFSQFGKLER|AMEEMNGKDLEGENIEIVFAKPPDQK|GFCFLEYEDHK|AGPIWDLR|SFSQFGK|HIGVCISVANNR		0.41573	0	18.208	0
P61290	Psme3	Mus musculus	Proteasome activator complex subunit 3	6	6	0.108484	0.864568	691348	808824	850955	824704	924788	860857	1.01269e+06	T	17	1	0.374763	-0.209949	29487.6	ASLLKVDQEVK|TVESEAASYLDQISR|RLDECEEAFQGTK|SNQQLVDIIEK|VFVMPNGMLK|MWVQLLIPR		0.27165	0	16.3119	0
P62852	Rps25	Mus musculus	Small ribosomal subunit protein eS25	13	12	0.108554	0.729428	21120322	18094224	28880650	33537534	38238088	26007208	26026262	T	222	1	0.374408	-0.455162	13733.7	DKLNNLVLFDKATYDK|VRDKLNNLVLFDK|AALQELLSK|LNNLVLFDKATYDKLCK|LNNLVLFDK|LITPAVVSER|HRAQVIYTR|NTKGGDAPAAGEDA|ATYDKLCK|AQVIYTR|AALQELLSKGLIK|GGDAPAAGEDA	DKLNNLVLFDK	0.536	0	20.2426	0
P11499	Hsp90ab1	Mus musculus	Heat shock protein HSP 90-beta	81	51	0.108664	1.20416	69329344	85674672	69617568	61695100	52285580	71032592	63946780	T	1183	1	0.374046	0.268032	83229.1	AVKDLVVLLFETALLSSGFSLEDPQTHSNR|DLVVLLFETALLSSGFSLEDPQTHSNR|GFEVVYMTEPIDEYCVQQLKEFDGK|HSQFIGYPITLYLEKER|RGFEVVYMTEPIDEYCVQQLKEFDGK|HLEINPDHPIVETLR|RVFIMDSCDELIPEYLNFIR|SIYYITGESKEQVANSAFVER|HSQFIGYPITLYLEK|KRGFEVVYMTEPIDEYCVQQLK|SLTNDWEDHLAVK|NPDDITQEEYGEFYK|RGFEVVYMTEPIDEYCVQQLK|KHSQFIGYPITLYLEKER|CLELFSELAEDKENYKK|ELKIDIIPNPQER|PEEVHHGEEEVETFAFQAEIAQLMSLIINTFYSNK|KHSQFIGYPITLYLEK|NLKLGIHEDSTNR|R…	YHTSQSGDEMTSLSEYVSR|LVSSPCCIVTSTYGWTANMER|VILHLKEDQTEYLEER|VFIMDSCDELIPEYLNFIR|KHLEINPDHPIVETLR|GFEVVYMTEPIDEYCVQQLK|HNDDEQYAWESSAGGSFTVR|LGLGIDEDEVTAEEPSAAVPDEIPPLEGDEDASRMEEVD|IRYESLTDPSKLDSGK|AQALRDNSTMGYMMAK|HFSVEGQLEFR|YIDQEELNKTKPIWTR|ELISNASDALDKIR|ADLINNLGTIAK|VILHLKEDQTEYLEERR|ELISNASDALDK|YESLTDPSKLDSGK|EGLELPEDEEEKKK|EGLELPEDEEEK|EDQTEYLEER|DNSTMGYMMAK|YIDQEELNK|YESLTDPSK|EGLELPEDEEEKK…	0.78039	0	27.4644	0
O88986	Gcat	Mus musculus	2-amino-3-ketobutyrate coenzyme A ligase, mitochondrial	3	3	0.108687	1.31486	634100	619717	564985	442038	338335	525286	572534	T	15	1	0.373336	0.394906	44901.9	CILDSELEGIRGAGTWK|LSSQMADDMLKK|FICGTQSIHK		0.09375	0	12.0689	0
Q8BMS1	Hadha	Mus musculus	Trifunctional enzyme subunit alpha, mitochondrial	30	30	0.108752	1.01626	5533728	5.57055e+06	5.46478e+06	5.35111e+06	5454051	5.50042e+06	5433374	T	127	1	0.372659	0.0232736	82617.5	TVLGVPEVLLGILPGAGGTQR|LPAKPEVSSDEDVQYR|KMGLVDQLVEPLGPGIKSPEER|SPKPVVAAISGSCLGGGLELAIACQYR|TIEYLEEVAVNFAK|AGLEQGSDAGYLAESQKFGELALTK|TLLKDTTVTGLGR|MQLLEIITTDKTSK|MGLVDQLVEPLGPGIKSPEER|SLNSEMDNILANLR|DTTASAVAVGLR|TRTHINYGVK|KMGLVDQLVEPLGPGIK|LTTYAMTVPFVR|VIIVVKDGPGFYTTR|FGGGSVELLK|MGLVDQLVEPLGPGIK|GFYIYQEGSK|ALMGLYNGQVLCKK|DGPGFYTTR|ILQEGVDPK|FVDLYGAQK|FGELALTK|TRTHINYGVKGDVAVIR|AGLEQGSDAGYLAESQK|VI…		0.43775	0	17.3292	0
O35685	Nudc	Mus musculus	Nuclear migration protein nudC	4	4	0.109115	0.720413	516563	593445	824074	735961	1.00998e+06	734162	1.08645e+06	T	23	1	0.373112	-0.473105	38334.3	LVTSDPEINTK|LSDLDSETR|LITQTFNHHNQLAQK|LVTSDPEINTKK		0.10843	0	10.3068	0
Q99LP6	Grpel1	Mus musculus	GrpE protein homolog 1, mitochondrial	3	3	0.10927	0.668162	73440.9	142814	91726.8	116577	187305	131679	165730	T	6	1	0.373042	-0.58173	24291.9	DLLEVADILEK|TLRPALVGVVKDA|ALADTENLR		0.15207	0	10.2398	0
Q8VE97	Srsf4	Mus musculus	Serine/arginine-rich splicing factor 4	4	2	0.109331	0.705631	159051	108712	87497.5	184603	184798	161275	127329	T	15	1	0.372452	-0.503014	55946.8	AEGESEAPNPEPR|ALEKLDGTEVNGR	LIVENLSSR|QAGEVTYADAHK	0.09611	0	11.3034	0
O70311	Nmt2	Mus musculus	Glycylpeptide N-tetradecanoyltransferase 2	6	5	0.109572	1.23736	384584	474126	500416	393819	293699	404634	374436	T	13	1	0.372865	0.307264	60445.9	EHIIDTFVVENPSGK|QFHLAPVMDDAEVAHWFLPR|LVGFISAIPANIR|MYHKNPTIPIQK|LTDFLSFYTLPSTVMHHPAHK	VAPVLIR	0.16635	0	13.0752	0
Q80TV8	Clasp1	Mus musculus	CLIP-associating protein 1	2	1	0.1098	1.95173	109212	48432.7	80372.2	28996.3	52057.8	63226.3	23082.3	T	7	1	0.372886	0.964755	169123	SQEDLNEPIKR	EGLLGLQNLLK	0.01433	0	10.3035	0
P02533	KRT14	Homo sapiens	Keratin, type I cytoskeletal 14	33	5	0.109849	0.449274	1.60056e+06	3399524	1.53918e+06	8603938	6407296	2.44458e+06	3097526	C	288	1	0.372472	-1.15433	51529.4	APSTYGGGLSVSSSR|ILTATVDNANVLLQIDNAR|DAEEWFFTKTEELNREVATNSELVQSGK|QRPAEIKDYSPYFK|NKILTATVDNANVLLQIDNAR	ADLEMQIESLKEELAYLKK|TEELNREVATNSELVQSGK|LLEGEDAHLSSSQFSSGSQSSR|TRLEQEIATYRR|VTMQNLNDRLASYLDKVR|ALEEANADLEVK|ISSVLAGGSCR|EVATNSELVQSGK|TRLEQEIATYR|ASLENSLEETKGR|LEQEIATYR|LASYLDKVR|VLDELTLAR|GSCGIGGGIGGGSSR|NHEEEMNALR|DAEEWFFTK|VTMQNLNDR|IRDWYQR|VTMQNLNDRLASYLDK|LAADDFR|CEMEQQNQEYK|QFTSSSSMK|NRKDAEEWFFTK|MSVEADINGLRR|TKYETELNLR|ILNEMRDQYEK|LASYLDK|LEQEIATYRR	0.61229	0	18.1724	0
Q3UQU0	Brd9	Mus musculus	Bromodomain-containing protein 9	1	1	0.110059	0.754468	98190.9	78314.8	127517	139290	157053	115369	119131	T	3	1	0.372837	-0.406467	66798.3	LLQDLHEAQAER		0.02013	0.000503778	9.11204	4.14662e-05
P97930	Dtymk	Mus musculus	Thymidylate kinase	2	2	0.110062	1.2151	251558	293232	235643	207359	258694	183289	210075	T	5	1	0.372142	0.281079	23899.6	SIEEVHKEIR|NAAQRPLGELWK		0.10377	0.0087116	9.0519	0.000741629
P11983	Tcp1	Mus musculus	T-complex protein 1 subunit alpha	40	36	0.110223	1.16392	18178266	23386424	19327978	18179516	15472649	18239026	17610342	T	369	1	0.371851	0.218987	60410.7	VLCELADLQDKEVGDGTTSVVIIAAELLK|SLLVIPNTLAVNAAQDSTDLVAK|IIGINGDYFANMVVDAVLAVK|LGVQVVITDPEKLDQIR|YINENLIINTDELGRDCLINAAK|SQIESMLINGYALNCVVGSQGMPK|ILATGANVILTTGGIDDMYLK|YINENLIINTDELGR|FATEAAITILR|SLHDALCVVKR|YPVNSVNILK|DNKQAGVFEPTIVK|GANDFMCDEMER|YFVEAGAMAVR|WIGLDLVHGKPR|QAGVFEPTIVK|ICDDELILIK|TSASIILR|EQLAIAEFAR|NLKWIGLDLVHGKPR|IACLDFSLQK|LLEVEHPAAK|AFHNEAQVNPERK|AFHNEAQVNPER|QKIHPTSVISGYR|DDKHGSYE…	SQNVMAAASIANIVK|MLVDDIGDVTITNDGATILK|MKLGVQVVITDPEKLDQIR|MEGPLSVFGDR	0.78237	0	24.3295	0
Q8BK58	Hspbap1	Mus musculus	HSPB1-associated protein 1	6	6	0.110764	1.1345	1965623	2.14855e+06	2.20109e+06	2.12216e+06	1.79799e+06	1.84447e+06	1.67647e+06	T	25	1	0.372825	0.182053	54360.5	VQEEHMEVEQAQGPSLTSR|GASALTEPLAPR|MVAQLLIQGK|INVVNPDLK|TVGEEGEPVKPFTPEK|WHLFPPEDTPFLYPTR		0.16977	0	18.329	0
Q8R3H9	Ttc4	Mus musculus	Tetratricopeptide repeat protein 4	2	2	0.110935	1.8439	343915	139943	127762	107092	76127.6	82098.5	145598	T	2	1	0.372579	0.882761	44311	GGFREDQWEEEFDKIPLFMK|AAAQYYLGNVR		0.08031	0.000503778	9.13304	4.14662e-05
P84091	Ap2m1	Mus musculus	AP-2 complex subunit mu	19	19	0.110989	1.28828	3.13422e+06	4959411	4.54373e+06	3.08325e+06	2.85202e+06	3.52682e+06	3.41754e+06	T	65	1	0.372089	0.365444	49623	WARPPISMNFEVPFAPSGLK|QSIAIDDCTFHQCVR|ESQISAEIELLPTNDKKK|ASENAIVWK|SYLSGMPECK|SPVTNIAR|VYRDDIGR|NAVDAFRVNVIHAR|TTKDIILPFR|SGIYETR|SISFIPPDGEFELMR|TFITQQGIK|SNFKPSLLAQK|YKASENAIVWK|LNYSDHDVIK|DIILPFR|LNYSDHDVIKWVR|LSKFDSER|FGMNDKIVIEK		0.43218	0	17.3451	0
P17095	Hmga1	Mus musculus	High mobility group protein HMG-I/HMG-Y	6	6	0.111934	0.77625	1.95197e+06	2.44015e+06	2320404	3.79773e+06	2877839	2571866	2.41226e+06	T	79	1	0.374285	-0.365407	11607.1	KQPPVSPGTALVGSQKEPSEVPTPK|KQPPVSPGTALVGSQK|KLEKEEEEGISQESSEEEQ|EPSEVPTPK|SSQPLASKQEK|KVTTAPGR		0.58879	0	22.2661	0
Q9ERU9	Ranbp2	Mus musculus	E3 SUMO-protein ligase RanBP2	49	49	0.112051	1.14669	7753547	7808304	6832280	6950684	5575904	6.87605e+06	6689105	T	174	1	0.37414	0.197473	340907	HLENDPSFQAHDTSGQK|HGLQPALLVHWAQSLQK|FGHVDQEKTPSFAFQGGSNTEFK|AMELKPLNVSNNALVWTASDYADGEAKVEQLAVR|SKPEDLPSDNDILIVYELTPTPEQK|SFVWHALDYADELPKPEQLAIR|SVFTTAASELANK|TAQEKDSLITPHVSHLSTPR|GKQDFLKEVVESFANK|IAIAVLEETTR|NTLTENMGPNQQK|YIASVQGSAPSPR|SIKDGFSFCIPVSADGFK|FKLQDVADSFKK|ALGTNTSTAPNHTLR|LIKGEAGQNLLETMAHDR|LSQSGHMLLNLSR|LLLPSTFFCYK|LLLDIPLQTPHK|FGESTTGFNFSFK|SQSNESAGSQVGTEFK|TGSSLNSFYDQR|ITPDMTLQTMK|S…		0.21225	0	19.282	0
E9Q634	Myo1e	Mus musculus	Unconventional myosin-Ie	1	1	0.112533	1.47635	128046	142889	128819	77785.1	120093	118055	59869	T	3	1	0.374703	0.562036	126738	VLQVSIGPGLPK		0.01084	0	11.1189	0
P54227	Stmn1	Mus musculus	Stathmin	3	2	0.113157	0.743216	405219	490397	530856	530683	849135	518869	698698	T	21	1	0.376412	-0.428147	17263.9	ASGQAFELILSPR|ASSDIQVK	DLSLEEIQK	0.20134	0	13.398	0
Q5U3K5	Rabl6	Mus musculus	Rab-like protein 6	3	3	0.113422	0.491564	161666	330250	214172	771514	658453	378541	229438	T	5	1	0.37702	-1.02455	79781.7	LFGTSPAAEVTPSPPEPAPALEAPAR|AADELEAFLGGGAPGSR|MFSALKK		0.06897	0	10.2926	0
Q6ZQ08	Cnot1	Mus musculus	CCR4-NOT transcription complex subunit 1	29	29	0.113914	1.4198	3.57339e+06	5.7609e+06	3.85294e+06	3.06163e+06	2192069	3.68459e+06	3.39137e+06	T	88	1	0.377897	0.505691	266637	GNAPEGLPQLMEVVR|IYNHPPHPTMSVDEVLEMLQR|SLLEVVVLSR|KDFALDSEESR|QLAVYEEFAR|TVTVTKPTGVSFKK|SPVTFLSDLR|NSFASALR|NVPGFLPTNDLSQPTGFLAQPMK|GLHNVVYGIQR|AVQELVHPVVDR|SNYEAMIDR|IVEPPENIQEK|VDMLSEINIAPR|KLGTSGLNQPTFQQSK|AQAEQQHNPAANPTMIR|VLGMMAR|NKPILHTDLDVK|ILPDSGGVAK|EWVNLYHSAAAGR|MVLNETYR|CPSILGGLAPEKDQPK|EVTAAQVAR|ASQQEIQHIVNR|AYGSPWCNK|TVTVTKPTGVSFK|NLILSAFPR|NLGHWLGMITLAK|DLDSYLK		0.14105	0	14.1986	0
Q8VEE4	Rpa1	Mus musculus	Replication protein A 70 kDa DNA-binding subunit	4	4	0.114056	0.760381	197094	301056	258378	314838	417635	298837	289953	T	4	1	0.377697	-0.395206	68993.6	NIYLMDMSGK|GWFDSEGQALDGVSISDHR|LFSLELVDESGEIR|AYGASKPFGKPAGTGLLQPSGGTQSK		0.11075	0	10.0767	0
O55023	Impa1	Mus musculus	Inositol monophosphatase 1	3	3	0.11408	0.801544	227382	254207	308824	267620	326800	383921	336604	T	6	1	0.377088	-0.319146	30416.2	LQVSQQEDITK|SLLVTELGSSR|IIAANSITLAK		0.11913	0	10.2503	0
P31938	Map2k1	Mus musculus	Dual specificity mitogen-activated protein kinase kinase 1	4	3	0.114087	0.857152	382829	417101	467932	494209	462473	446655	571090	T	18	1	0.376401	-0.222377	43446.4	KLEELELDEQQR|KLEELELDEQQRK|VSHKPSGLVMAR	KRLEAFLTQK	0.08651	0	12.2001	0
P29699	Ahsg	Mus musculus	Alpha-2-HS-glycoprotein	2	2	0.1147	0.471884	95955.9	86204.8	95330.8	396698	287253	92756.2	139008	T	5	1	0.377513	-1.0835	37301.7	ANLMHNLGGEEVSVACK|QVLNQIDKVK		0.07826	0	11.1863	0
Q9WV32	Arpc1b	Mus musculus	Actin-related protein 2/3 complex subunit 1B	11	11	0.114708	1.2268	2679405	2.00046e+06	2.10464e+06	1.73702e+06	1.57286e+06	2.1156e+06	1932453	T	33	1	0.376886	0.2949	41037.5	NSVSQISVLSGGK|SLESALKDLK|TQIAICPNNHEVHIYEK|VHELKEHNGQVTGIDWAPESNR|ASSEGGAATGAGLDSLHK|WAPNENKFAVGSGSR|EVEERPAPTPWGSK|TWKPTLVILR|ERFQNLDKK|NAYVWTLK|IFSAYIK		0.38441	0	15.2593	0
P30681	Hmgb2	Mus musculus	High mobility group protein B2	15	11	0.114724	0.843905	3102723	3.67195e+06	3506759	4261546	4.76774e+06	3.57075e+06	3.71175e+06	T	137	1	0.376203	-0.244847	24146.9	IKIEHPGLSIGDTAK|RPPSAFFLFCSENRPK|LGEMWSEQSAK|IKIEHPGLSIGDTAKK|KLGEMWSEQSAK|SKFEDLAK|KHPDSSVNFAEFSK|LGEMWSEQSAKDKQPYEQK|HPDSSVNFAEFSKK|EKSKFEDLAK|KHPDSSVNFAEFSKK	MSSYAFFVQTCR|MSSYAFFVQTCREEHKK|YEKDIAAYR|EKYEKDIAAYR	0.49524	0	16.2275	0
P61082	Ube2m	Mus musculus	NEDD8-conjugating enzyme Ubc12	5	5	0.114778	1.21344	1.29538e+06	1.07423e+06	1.08031e+06	993646	924248	779882	1.10902e+06	T	17	1	0.375617	0.279104	20886.6	LVICPDEGFYK|GGYIGSTYFER|LFEQNVQR|DINELNLPK|IQKDINELNLPK		0.22951	0	12.1681	0
Q8C156	Ncaph	Mus musculus	Condensin complex subunit 2	7	7	0.114847	1.17593	1155744	908827	978118	842542	751780	957884	893562	T	23	1	0.375032	0.233802	82251.1	ATTLPTDFHYETDNLIQLHLKPGKR|VFDLQFSTDSIHLASPNR|VAAGTLDASTK|TPVLEDFPQNDDEKER|SETMNSSFLK|QSMWSLLTK|STLENQNWK		0.13406	0	15.1006	0
P35908	KRT2	Homo sapiens	Keratin, type II cytoskeletal 2 epidermal	53	33	0.115487	0.544963	16245287	23526158	14423668	66789868	29590332	21879634	25533068	C	717	1	0.376368	-0.875769	65393.2	NKLNDLEEALQQAKEDLAR|FGGFGGPGGVGGLGGPGGFGPGGYPGGIHEVSVNQSLLQPLNVK|SKEEAEALYHSKYEELQVTVGR|HGDSLKEIKIEISELNR|VELQSKVDLLNQEIEFLK|GGGFGGGSSFGGGSGFSGGGFGGGGFGGGR|HGGGGGGFGGGGFGSR|VDLLNQEIEFLK|FGGFGGPGGVGGLGGPGGFGPGGYPGGIHEVSVNQSLLQPLNVKVDPEIQNVK|NVQDAIADAEQRGEHALKDAR|GSSSGGGYSSGSSSYGSGGR|GGSISGGGYGSGGGK|TAAENDFVTLKK|SKEEAEALYHSK|LNDLEEALQQAKEDLAR|NKLNDLEEALQQAK|TAAENDFVTLK|YGSGGGSKGGSISGGGYGSGGGK|TSQNS…	VLYDAEISQIHQSVTDTNVILSMDNSR|GFSSGSAVVSGGSR|FLEQQNQVLQTK|TSQNSELNNMQDLVEDYKK|LALDVEIATYR|NLDLDSIIAEVK|TLNNKFASFIDKVR|KYEDEINKR|FASFIDKVR|LALDVEIATYRK|LLRDYQELMNVK|KLLEGEECR|DVDNAYMIK|DYQELMNVK|GFSSGSAVVSGGSRR|AQYEEIAQR|LLEGEECR|VDPEIQNVK|FASFIDK|IEISELNR	0.74961	0	25.179	0
Q05CL8	Larp7	Mus musculus	La-related protein 7	3	3	0.115801	3.29875	371320	323390	337964	34910.8	50609.1	243441	273829	T	5	1	0.376892	1.72192	64762.3	DKVEASSLPEAR|HSWNLEVLSGDHEQR|HKMGEEVIPLR		0.06667	0	11.2961	0
Q8K363	Ddx18	Mus musculus	ATP-dependent RNA helicase DDX18	7	7	0.115893	1.36429	993205	1.4958e+06	1.35995e+06	1.11006e+06	704631	1.08653e+06	867508	T	18	1	0.376618	0.448147	74134.3	GHALLILRPEELGFLR|LLNGINIIVATPGR|LQETSDTSLSQPQNGDVPKETGKGGK|LQETSDTSLSQPQNGDVPKETGK|GLDIPEVDWIVQYDPPDDPKEYIHR|QTMLFSATQTR|GGGGGFGYQK		0.15455	0	14.6229	0
P33173	Kif1a	Mus musculus	Kinesin-like protein KIF1A	2	1	0.115946	0.459465	723009	153143	448566	722892	1.11592e+06	797212	636990	T	2	1	0.37638	-1.12197	191604	TPSPVRATETEK	ISLVDLAGSER	0.01357	0.000503778	12.1277	4.14662e-05
O88342	Wdr1	Mus musculus	WD repeat-containing protein 1	19	19	0.116024	1.08043	3.91204e+06	4281911	4.28861e+06	3.94488e+06	3.82963e+06	4.05479e+06	3.57762e+06	T	93	1	0.376036	0.111608	66365	NIDNPAIADIYTEHAHQVVVAK|FGAVFLWDTGSSVGEITGHNK|IKDIAWTEDSKR|VYSILASTLKDEGKLLEAK|VFASLPQVER|VYSILASTLKDEGK|IWDTTQKEHLLK|VVTVFSVADGYSENNVFYGHHAK|GPVTDVAYSHDGAFLAVCDASK|LHHVSSLAWLDEHTLVTTSHDASVKEWTITY|YEYQPFAGK|ILGGDPKGDHFLYTNGK|YTNLTLR|IWDTTQKEHLLKYEYQPFAGK|VINSVDIK|IAVVGEGR|GDHFLYTNGK|KVFASLPQVER|DYSGQGVVK		0.38119	0	20.1564	0
P13647	KRT5	Homo sapiens	Keratin, type II cytoskeletal 5	36	6	0.116207	0.465069	1.28856e+06	1.954e+06	1027716	5417128	4653255	1.49954e+06	2.009e+06	C	331	1	0.37605	-1.10448	62340	VSLAGACGVGGYGSR|NKLAELEEALQK|ISISTSGGSFR|LAELEEALQK|LRAEIDNVKK|AQYEEIANR	SRTEAESWYQTKYEELQQTAGR|LALDVEIATYR|NLDLDSIIAEVK|VDALMDEINFMK|TLNNKFASFIDKVR|VLDTKWTLLQEQGTK|NKYEDEINKR|FASFIDKVR|LALDVEIATYRK|WTLLQEQGTK|KLLEGEECR|YEELQQTAGR|QLDSIVGER|SFSTASAITPSVSR|LLREYQELMNTK|QCANLQNAIADAEQRGELALKDAR|SRTEAESWYQTK|TTAENEFVMLKK|TEAESWYQTK|TSFTSVSR|RQLDSIVGER|LLEGEECR|GRLDSELR|QNLEPLFEQYINNLRR|FLEQQNK|NTKHEISEMNR|SGGGGGGGFGR|FASFIDK|SLYNLGGSKR|EYQELMNTK	0.51525	0	17.3445	0
Q9JKX6	Nudt5	Mus musculus	ADP-sugar pyrophosphatase	4	4	0.117015	0.825024	667258	489612	576702	676340	789484	600175	727462	T	10	1	0.37861	-0.277493	23969	TTYMDPTGK|VYAYGLALK|TLHHECVILVK|HANSKPFEVPFLKF		0.19725	0.000503778	9.24427	3.2533e-05
Q91W43	Gldc	Mus musculus	Glycine dehydrogenase (decarboxylating), mitochondrial	1	1	0.117081	0.775313	101563	129461	120296	123012	153555	136723	197488	T	1	1	0.378384	-0.367149	113195	FGVPLGYGGPHAAFFAVK		0.01756	0	11.1482	0
P62715|P63330	Ppp2cb|Ppp2ca	Mus musculus	Serine/threonine-protein phosphatase 2A catalytic subunit beta isoform|Serine/threonine-protein phosphatase 2A catalytic subunit alpha isoform	1	0	0.117549	0.400304	37703.4	148749	41505.2	219103	228817	72930.2	152515	T	1	2	0.379709	-1.32083	35552.32930040727|35585.41230175737		GAGYTFGQDISETFNHANGLTLVSR	0.08091|0.08091	0	13.1668	0
Q8C878	Uba3	Mus musculus	NEDD8-activating enzyme E1 catalytic subunit	2	2	0.117757	0.76425	151596	244345	175486	216718	238468	296038	232432	T	4	1	0.37973	-0.387884	51704.3	SPAITATLEGK|VLVIGAGGLGCELLK		0.05628	0	12.1585	0
A2A4P0	Dhx8	Mus musculus	ATP-dependent RNA helicase DHX8	6	5	0.118026	0.764282	589614	458346	497039	628241	924530	582437	595970	T	20	1	0.379809	-0.387824	142482	VANVADVVSK|HKLDVVSCGK|TNLASTVLSLK|RVAAMSVAK|VLSFTGTK	YMTDGMLLR	0.04582	0	11.259	0
Q9R0P9	Uchl1	Mus musculus	Ubiquitin carboxyl-terminal hydrolase isozyme L1	3	3	0.118205	0.675026	376136	432256	539553	572762	697388	471385	997058	T	6	1	0.380035	-0.566986	24822.4	QFLSETEKLSPEDR|FSAVALCK|LGVAGQWR		0.13453	0.00827586	9.07252	0.000725139
P07091	S100a4	Mus musculus	Protein S100-A4	3	3	0.118383	0.762328	640778	799767	663598	814644	1278094	801478	842259	T	20	1	0.379831	-0.391517	11713.7	ARPLEEALDVIVSTFHK|TDEAAFQK|ELPSFLGK		0.32673	0	20.3102	0
O08784	Tcof1	Mus musculus	Treacle protein	22	22	0.118511	0.769834	4513687	3386636	3.95558e+06	5.97484e+06	6.11071e+06	4.59178e+06	4.03051e+06	T	163	1	0.379754	-0.37738	134921	AGAVTSSASLSSPALAK|SSQVRPVSTVTPGSSGK|ATPRPDSNSLASSAPATKDNPDGK|VLTELLEQER|LLEQAWPLSEAQVQASVVK|TSVTTPAALSR|GKPPVPNSTVSAR|KLSGDLEAGAPK|SQHAADTALPK|ELLPLIYHHLLQAGYVR|LGNVAPTPAKPAR|ATPRPDSNSLASSAPATK|ASAVSPEKAPMTSK|GPILATPGK|AALGQGVAPVHTQK|LSGDLEAGAPK|EKPDGELLGIK|ASLALPQK|VLTELLEQERLK|GANLPCPGK|STSSSPAPTQTLPNSITQR|QQLAPGYPK		0.19621	0	16.4741	0
Q2YDW2	Msto1	Mus musculus	Protein misato homolog 1	10	10	0.119234	1.14551	1.79226e+06	1.96027e+06	1.82427e+06	1.39304e+06	1.69043e+06	1.83562e+06	1.59957e+06	T	46	1	0.382221	0.195989	61191.8	LNPGTPLPSALHACASGEEVLAQYLQQQHPR|GAAVQSIPVFGALR|NPNLQGLLSAEGVR|TLHGQETYTPR|TLGDLAEELSR|GLAMDSTPK|CFAQSVVLR|VAPPYPHFFSSFSQK|LILMDLK|YHHDGETGRLEAFGQGESVLKEPR		0.26079	0	13.2294	0
Q7Z794	KRT77	Homo sapiens	Keratin, type II cytoskeletal 1b	8	3	0.119334	0.581698	451436	517939	315876	1.39528e+06	584374	599714	553477	C	44	1	0.381796	-0.781658	61863.5	VDTLTGEVNFLK|YQELQITAGR|TGSENDFVVLKK	FLEQQNQVLQTK|FASFIDKVR|SLDLDSIIDAVR|FASFIDK|SKYEDEINKR	0.13322	0	17.2546	0
Q8BGQ7	Aars1	Mus musculus	Alanine--tRNA ligase, cytoplasmic	34	34	0.119349	1.06776	8466556	9333754	9341791	8.22145e+06	8900924	8503226	8248991	T	213	1	0.381156	0.0945835	106841	NVGCLQEALQLATSFAQLR|KAEEIVNGMIEAAKPVYTQDCPLAAAK|THSPQTSAMLFTVDNEAGKITCLCQVPQNAANR|NSSHAGAFVIVTEEAIAK|QLIDSNPNQPLVILEMESGASAK|ASEWVQQVSGLMDGK|GGYVLHIGTIYGNLK|EIADLGEALATAVIPQWQKDEQRETLK|QIWQNLGLDEAR|VGAEDADGIDMAYR|RIVAVTGAEAQK|RRPVMSNHTATHILNFALR|SVLGEADQKGSLVAPDRLR|VDDSSEDKTEFTVK|GLVVDMNGFEEERR|GLEATDDSPK|MDATLTAR|TITVALADGGRPDNTGR|GAMSTQQIK|IQSLGDCK|AVFDETYPDPVR|SVLGEADQKGSLVAPDR|ESDGVLKPLPK|LVS…		0.42665	0	19.3446	0
P47963	Rpl13	Mus musculus	Large ribosomal subunit protein eL13	20	17	0.119773	1.39133	34195740	25333038	37395136	18674098	19003400	31464190	24680618	T	327	1	0.382238	0.476466	24290.5	NKSTESLQANVQR|ARVITEEEKNFK|VITEEEKNFKAFASLR|VDTWFNQPARK|STESLQANVQR|PASGPIRPIVR|VDTWFNQPAR|VITEEEKNFK|AKEAAEQDVEK|SKLILFPR|AGRGFSLEELR|IAPRPASGPIRPIVR|NGMILKPHFHK|TIGISVDPR|GFSLEELR|EAAEQDVEK|EAAEQDVEKKK	KGDSSAEELKLATQLTGPVMPIR|LATQLTGPVMPIR|NGMILKPHFHKDWQQR	0.64929	0	24.3788	0
Q80WS3	Fbll1	Mus musculus	rRNA/tRNA 2'-O-methyltransferase fibrillarin-like protein 1	3	1	0.11995	1.3384	95472.1	101752	123845	97190.3	79433.4	90870.4	56841.4	T	27	1	0.382492	0.420514	33318.4	KLQQENLK	DHAVVVGVYRPPPK|IVALNAHTFLR	0.1051	0	15.2158	0
Q8BG79	Cwf19l2	Mus musculus	CWF19-like protein 2	1	1	0.120384	0.746122	85097.1	71614.9	79115.3	102477	147621	79507.8	101425	T	3	1	0.38308	-0.422517	103108	FESASSIEER		0.01127	0	10.1616	0
E9PZJ8	Ascc3	Mus musculus	Activating signal cointegrator 1 complex subunit 3	6	6	0.120557	1.25206	346294	443242	446925	278261	301949	333157	408214	T	9	1	0.383207	0.324306	250398	LPVINVGISVK|ETSAFIAGAK|AGRPQFDDQGK|TNFISSHTEKPVR|TAMSLIER|AVYIAPLK		0.02775	0.000503778	9.04737	4.14662e-05
Q9JHS4	Clpx	Mus musculus	ATP-dependent Clp protease ATP-binding subunit clpX-like, mitochondrial	4	4	0.121814	1.25885	387418	399839	334470	267478	239763	370415	323770	T	8	1	0.386715	0.332111	69185.7	AQQGIVFLDEVDKIGSVPGIHQLR|TLVQILTEPR|AAAAADLANR|QQAEAEKQTSLTPR		0.09148	0	14.2093	0
P70261	Pald1	Mus musculus	Paladin	11	11	0.122094	1.25894	1258235	1.35696e+06	1.07807e+06	945238	760103	1.1663e+06	1071653	T	33	1	0.38714	0.33221	96678.5	ALGNILAYLSDAK|MPIYGTAQPSAK|AISACAELHDLKEEVLK|RLESFRPESR|GGLPVFGMGQPSLLGFRR|TNLGMVLGTLVMFHHSR|LSDATPEHYLVQGR|MDILGTLK|EMDVANFR|SCGAPNFR|AHLSAPVPNTK		0.15832	0	14.2543	0
Q9CQ65	Mtap	Mus musculus	S-methyl-5'-thioadenosine phosphorylase	7	7	0.122461	0.836437	1.25208e+06	1.15379e+06	1.1076e+06	1.33592e+06	1.67015e+06	1.16016e+06	1.47707e+06	T	35	1	0.387322	-0.257672	31041.7	TSLRPQTFYDGSHCSAR|YVDTPFGKPSDALILGK|IGIIGGTGLDDPEILEGRTEK|IKNVDCVLLAR|IGIIGGTGLDDPEILEGR|GTIVTIEGPR|AESLIFR		0.29329	0	13.1373	0
O35134	Polr1a	Mus musculus	DNA-directed RNA polymerase I subunit RPA1	2	2	0.122833	1.38845	158832	149126	210215	94520.9	106094	134755	169300	T	2	1	0.388435	0.473474	193987	TALSSVDAAQR|EGLVDTAVK		0.01165	0	9.27909	0
Q6P9R2	Oxsr1	Mus musculus	Serine/threonine-protein kinase OSR1	2	2	0.123325	1.99648	157808	103587	100149	41880	38859.9	141308	52808.3	T	2	1	0.389324	0.997461	58177.1	IVEEPQSNR|IPISLVLR		0.03226	0.000503778	9.24579	3.2533e-05
P60122	Ruvbl1	Mus musculus	RuvB-like 1	5	5	0.123369	0.813115	697768	867193	727640	1.04651e+06	1.10424e+06	789656	839732	T	17	1	0.388833	-0.298469	50182.3	AQTEGINISEEALNHLGEIGTK|YSVQLLTPANLLAK|GLGLDESGLAK|AVLLAGPPGTGK|EACGVIVELIK		0.15351	0	11.0702	0
O88271	Cfdp1	Mus musculus	Craniofacial development protein 1	3	3	0.123581	0.707084	302397	229555	416647	364038	575692	388631	436065	T	9	1	0.389065	-0.500047	32901.4	VAEETEEISSNKPLVK|VFDFAGEEVR|ASGMSSLLGK		0.12203	0	14.2159	0
P56812	Pdcd5	Mus musculus	Programmed cell death protein 5	3	3	0.123794	0.707196	258343	458512	432821	546275	669305	443249	469855	T	5	1	0.389132	-0.499818	14266.3	ADEELEALRK|LSNLALVKPEK|VSEQGLIEILEK		0.2619	0	11.1907	0
P62849	Rps24	Mus musculus	Small ribosomal subunit protein eS24	11	6	0.124352	1.30424	3.56234e+06	5.86576e+06	5859544	3.90966e+06	3.48447e+06	4.04436e+06	3.81368e+06	T	107	1	0.390438	0.383208	15413.4	TTGFGMIYDSLDYAKK|TTPDVIFVFGFR|TTGFGMIYDSLDYAKKNEPK|KQMVIDVLHPGKATVPK|ATVPKTEIREK|ATVPKTEIR	TTGFGMIYDSLDYAK|KQMVIDVLHPGK|QMVIDVLHPGK|MNDTVTIR|MYKTTPDVIFVFGFR	0.49624	0	17.1651	0
P24472	Gsta4	Mus musculus	Glutathione S-transferase A4	6	5	0.124491	0.707798	648923	1.10128e+06	1.04049e+06	1070649	1.28055e+06	1.13901e+06	1.71883e+06	T	25	1	0.390147	-0.498591	25547.4	KPPPDGPYVEVVR|EKEESYDLILSR|AILSYLAAK|LYYFNGR|YFPVFEK	FLQPGSQR	0.25225	0	10.4374	0
Q7TNV0	Dek	Mus musculus	Protein DEK	10	10	0.124717	0.687661	2.59634e+06	2872840	3009534	5012905	5949108	3.03444e+06	3.12928e+06	T	59	1	0.390307	-0.54023	43132	LLADANLEEVTMK|LTMQVSSLQR|NVGQFSGFPFEK|SICEVLDLER|LTMQVSSLQREPFTVTQGK|EPFTVTQGK|LLYNRPGTVSSLKK|IHFFLSK|EVYENYPAYDLTER|SLIVEGKR		0.25526	0	15.1633	0
P20108	Prdx3	Mus musculus	Thioredoxin-dependent peroxide reductase, mitochondrial	2	2	0.12527	0.767462	172638	244833	170388	251020	227175	217902	322628	T	7	1	0.391503	-0.381832	28109.4	HLSVNDLPVGR|GLFIIDPNGVVK		0.08949	0	11.2955	0
Q9CX34	Sugt1	Mus musculus	Protein SGT1 homolog	13	12	0.125562	1.2082	4.80938e+06	3.94245e+06	3.44472e+06	3.19368e+06	2933939	3.74123e+06	3.52122e+06	T	74	1	0.391803	0.272864	38135	AAAAAGPASSQR|SFMESGGTVLSTNWSDVGKR|LFQQIYSDGSDEVKR|LLHPIIPEQSTFK|ALEQNPDDAQYYCQR|YRDGIADVKK|LEGQGDEPTPK|IPAGEDYSLK|WEKLEGQGDEPTPK|VGFSERELSALVK|ELSALVK|SLELNPNNCTALLRK	NMYPSSSHYTR	0.44048	0	15.6344	0
P61027	Rab10	Mus musculus	Ras-related protein Rab-10	2	1	0.125564	0.772033	222206	300239	226435	328816	416370	269346	285059	T	9	1	0.391138	-0.373265	22526.6	NIDEHANEDVER	FFETSAK	0.095	0.000503778	9.04759	4.14662e-05
Q8BP67	Rpl24	Mus musculus	Large ribosomal subunit protein eL24	11	8	0.125616	1.24271	14430572	10981608	10344021	8750940	8287392	9896188	11291814	T	154	1	0.390603	0.313491	17767.9	TDGKVFQFLNAK|CESAFLSKR|QINWTVLYR|VELCSFSGYK|CESAFLSK|QINWTVLYRR|VFQFLNAK|GQSEEIQK	AITGASLADIMAK|MKVELCSFSGYK|AITGASLADIMAKR	0.41401	0	16.3348	0
Q7TT37	Elp1	Mus musculus	Elongator complex protein 1	12	12	0.125717	1.25301	1474200	2296040	1.82623e+06	1.36148e+06	1.40212e+06	1.70285e+06	1.41579e+06	T	47	1	0.390389	0.325397	149489	SLAVQLADGQVLK|AEQGTVLIGSER|AFESTLQLMER|VFLENVETFVK|IVTVVPQDTK|QIDSVNHINLFFTELREEDVTK|LGAVGGNGFKVPLTTPHLEKR|TTPELEIVLQK|AAMEAINPR|INLNLIHDHNPK|VLVTVFR|LILQMPR		0.10953	0	13.3381	0
Q9CW03	Smc3	Mus musculus	Structural maintenance of chromosomes protein 3	22	22	0.125891	1.14875	2996575	2.49423e+06	2.87729e+06	2.43173e+06	2.13027e+06	2.72447e+06	2433243	T	76	1	0.390108	0.200071	141468	MVTKNDVMNLLESAGFSR|KAEEELGELEAK|INQMATAPDSQR|SEDLDNSIDKTEAGIKELQK|INNEIDQLMNQMQQIETQQR|VETYLNENLR|LHTLEEEKEELAQYQK|AFTMDCITLEGDQVSHR|AKDLQDELAGNSEQR|NYLWREENAEQQALAAK|GALTGGYYDTR|KDQYFLDKK|ALDQFVNFSEQKEK|NLEQYNKLDQDLNEVK|LALLHEGTGPR|SLDQAINDKKR|SNPYYIVK|NKVSHIDVITAEMAKDFVEDDTTHG|DKMEDIER|ILMEFNK|QVIIQGFR|AILNGIDSINKVLEHFR		0.24815	0	16.2594	0
Q811U4	Mfn1	Mus musculus	Mitofusin-1	2	2	0.12604	1.3961	93219	126614	84485.8	52295.6	87839.1	88257.1	64682.7	T	3	1	0.390212	0.481403	83672.8	VLLGLSEPIFQVPR|TKFEQHTIR		0.03104	0	8.21031	0
Q9R0Q6	Arpc1a	Mus musculus	Actin-related protein 2/3 complex subunit 1A	1	1	0.126074	2.82702	92019.7	111049	91954.8	8705.8	40721.4	74685	54422.7	T	1	1	0.389596	1.49928	41599.7	TQIALSPNNHEVHIYKK		0.04595	0.000503778	9.07869	4.14662e-05
Q7TPV4	Mybbp1a	Mus musculus	Myb-binding protein 1A	75	69	0.126225	1.31626	19812352	29066082	28012562	20294530	14997203	23392980	19071710	T	545	1	0.389687	0.396447	151942	AGNALGGVDNEEEEELGDEAMMALDQNLASLFK|RYCHEVGPCAEALHAQVER|LKSEGTTPEKNAASQQDAVTEGAMPAATGK|NAASQQDAVTEGAMPAATGKDQPPSTGKK|ALVDILSEVPESMFQEILPK|NAASQQDAVTEGAMPAATGK|LSQVNGATPVSPIEPESK|LSVDLTAPLGVLQSK|HQAQACLMLQK|TVNHEKLSVDLTAPLGVLQSK|HFGENMVISKPQNLFK|EFLDFFWDIAKPDQETR|LVSLVDHLHLEKDEAVVEQIAR|LHGADTEDSEDQAANCLDLDFVTR|QAWDQMMSTLKELEAR|SPTKAEPATPAEAAQSDRHSLLEHSR|NVTSVTSLTTQQR|NAASQQDAVTEGAMPAATGKDQPPSTGK|ATQ…	SPAPSNPTLSPSTPAKTPK|SPAPSNPTLSPSTPAK|LYDLYWQAMR|LVQLADMLLNHNR|MLGVQRPK|YSLQAMNK	0.52381	0	28.3771	0
Q9D880	Timm50	Mus musculus	Mitochondrial import inner membrane translocase subunit TIM50	7	7	0.126298	1.18922	1.07651e+06	1.25673e+06	1.00012e+06	790179	892126	1.01971e+06	1.04089e+06	T	32	1	0.389282	0.250015	39751.6	TPEQVTEIANR|TVLEHYALEDDPLEAFKQR|QGLSFGSLASR|TIALNQVEDVR|QSRLEQEEQQR|TVLEHYALEDDPLEAFK|AQGPQHQPGSEGPSYAK		0.22663	0	15.215	0
P16254	Srp14	Mus musculus	Signal recognition particle 14 kDa protein	4	4	0.126544	0.746001	780669	631575	802165	1.16457e+06	1271948	807641	783548	T	31	1	0.389353	-0.422751	12501.8	VLLESEQFLTELTR|KSSVEGLEPAENK|SSGSVFITLK|ISTVVSSK		0.40909	0	18.4586	0
P31230	Aimp1	Mus musculus	Aminoacyl tRNA synthase complex-interacting multifunctional protein 1	14	13	0.126849	1.20922	7599421	5.69661e+06	6.04516e+06	5.45037e+06	4.71737e+06	6218159	4897039	T	116	1	0.389692	0.274074	33975.9	KHPDADSLYVEEVDVGEAAPR|EIEELKQELILAEIHNGVEQVR|IWEQIQPDLHTNAECVATYK|TVVSGLVNHVPLEQMQNR|GAEADQIIEYLK|QQSAAASTDSKPIDASR|ITFDAFPGEPDKELNPK|ATNDAVLKR|AILQATMREEK|IGCIVTAK|ATNDAVLK|QQVALLK|EKQQSAAASTDSKPIDASR	MVVLLCNLKPAK	0.56774	0	22.3545	0
P46718	Pdcd2	Mus musculus	Programmed cell death protein 2	2	2	0.127551	0.814266	251219	190219	291135	271812	323392	292771	295762	T	4	1	0.392301	-0.296428	38316.7	IALEPEQILR|VGGRPAWLGLAELPGPGALACAR		0.09621	0	13.2384	0
Q80UM3	Naa15	Mus musculus	N-alpha-acetyltransferase 15, NatA auxiliary subunit	23	21	0.128356	1.18919	3.18617e+06	4.20436e+06	3.66028e+06	3.29124e+06	2.61317e+06	3.36342e+06	3.10216e+06	T	91	1	0.394667	0.249979	100897	NLQTCMEVLEALCDGSLGDCKEAAEAYR|WMDEAQALDTADRFINSK|RLPLNFLSGEK|SYVDLLKLEDVLR|ALKPANMLER|MVYYLDSSSQKR|LEDAADVYR|VETPLEEAIK|LFGATNPK|NFNETFLKR|IYEEAWTKYPR|TVLKQEMNR|YQLLQLRPAQR|EALEHLCTYEK|QILSNPK|IAIEIYLK|LKIYEEAWTKYPR|FGEALKK|ILEEFRK|NALKWDKDNLQILR|GCPPVFNTLR	DLSLLQIQMR|FAEHGETLAMK	0.28439	0	16.2836	0
P28658	Atxn10	Mus musculus	Ataxin-10	10	10	0.128463	1.13254	2.95058e+06	3249268	2891599	2.37975e+06	2.55806e+06	3.03061e+06	2.76434e+06	T	47	1	0.394689	0.179559	53672.5	NLTEDNSQNQDVIAK|LVGEEQLTKDDISIFVR|SGDKLILK|MEEQGLADASLLKK|SPELVEAMYGK|ALTALFKEQR|ALTALFK|LTSEPHTEDKEALVTIR|MGFEIEK|LIGNLCYK		0.22526	0	16.3682	0
Q8BYN3	Itpk1	Mus musculus	Inositol-tetrakisphosphate 1-kinase	4	4	0.128522	1.30041	1.16781e+06	786061	855297	777516	643017	862357	587483	T	10	1	0.394332	0.378962	46116.4	LGCTTGVSPSFQQHCVASLATK|LLAEPAGSLAGER|GIEVVQLNLSRPIEEQGPLDVIIHK|FQEYIDAHPETIVLDPLPAIR		0.19332	0	17.1902	0
Q9D0G0	Mrps30	Mus musculus	Large ribosomal subunit protein mL65	2	2	0.128574	1.25327	419265	314508	309879	301364	311302	276621	219822	T	7	1	0.393844	0.325703	49908	DLEVVATPVAR|YQINDKPHNQIR		0.05204	0	10.1788	0
Q9CZD3	Gars1	Mus musculus	Glycine--tRNA ligase	1	1	0.129125	0.551741	45238.3	167122	81944.4	188689	155779	135322	143279	T	4	1	0.395417	-0.857938	81825.7	TLHVEEVVPSVIEPSFGLGR		0.02743	0	13.2179	0
Q1PSW8	Trim71	Mus musculus	E3 ubiquitin-protein ligase TRIM71	6	6	0.129173	1.29008	759446	1.10627e+06	883636	663916	564091	859754	753699	T	12	1	0.39522	0.367466	91996.3	SIGFVSSGAFAPLTK|GVAFNNEGHLVVTDFNNHR|MLAQVQELK|FLGSEGSGNGQFLRPQGVAVDQEGR|ALDILLAR|LLVIHPDCQSAR		0.10292	0	13.339	0
P62878	Rbx1	Mus musculus	E3 ubiquitin-protein ligase RBX1	1	1	0.129389	1.19622	208477	176520	201222	140456	176810	146976	193125	T	2	1	0.395571	0.258478	12265.7	AAAMDVDTPSGTNSGAGK		0.16667	0	17.3438	0
Q60862	Orc2	Mus musculus	Origin recognition complex subunit 2	2	2	0.129415	1.30056	185149	139660	161177	91335.3	142219	146522	123171	T	3	1	0.394919	0.379131	65853	VPSVQFVGDDDVLSHILDREGGTK|LALELAK		0.05382	0	12.1739	0
Q9CYX7	Rrp15	Mus musculus	RRP15-like protein	2	2	0.129675	0.369126	232468	1.44006e+06	1.81071e+06	2.05164e+06	2.01986e+06	2.46224e+06	2.70816e+06	T	6	1	0.394625	-1.43781	31038.7	GVVQLFNAVQK|AAAVQDSR		0.06762	0	10.1345	0
Q61539	Esrrb	Mus musculus	Steroid hormone receptor ERR2	2	1	0.130384	1.37202	170793	325321	247923	201099	170213	184909	147230	T	3	1	0.396282	0.456304	48296.7	LQDLLHEALQDYELSQR	LFLEMLEAKV	0.06236	0.000503778	10.1436	4.14662e-05
P54775	Psmc4	Mus musculus	26S proteasome regulatory subunit 6B	23	22	0.130531	1.11942	8330519	7.39331e+06	8613670	6.81362e+06	6.94871e+06	8.16901e+06	7071570	T	171	1	0.396302	0.162746	47378.6	IQSIPLVIGQFLEAVDQNTAIVGSTTGSNYYVR|ENAPAIIFIDEIDAIATK|LQQELEFLEVQEEYIKDEQK|MEEIGILVEK|RFDAQTGADREVQR|HSNALVDVLPPEADSSIMMLTSDQKPDVMYADIGGMDIQKQEVR|ILSTIDRELLKPNASVALHK|EAVELPLTHFELYK|TVIKKDEQEHEFYK|YIVLAKDFEK|FDAQTGADREVQR|EFLHAQEEVKR|RLIFSTITSK|VVGSEFVQK|GVLMYGPPGCGK|AVAHHTTAAFIR|QIGIDPPRGVLMYGPPGCGK|LIFSTITSK|KIEFPLPDRR|MNLSEEVDLEDYVARPDK|ENAPAIIFIDEIDAIATKR|YLGEGPR	VIMATNR	0.7201	0	18.3898	0
Q64012	Raly	Mus musculus	RNA-binding protein Raly	9	9	0.131249	1.26974	1.16917e+06	952246	1.14473e+06	705345	829248	1138856	798033	T	13	1	0.399208	0.344535	33167.8	SNIDALLGRLEQIAEEQKANPDGK|VFIGNLNTAVVK|SSELQTIKTELTQIK|GYAFVQYANER|VTVPLVR|LSPVPVPR|SDVETIFSK|SSELQTIK|KSDVETIFSK		0.27885	0	12.357	0
Q99J72	Apobec3	Mus musculus	DNA dC->dU-editing enzyme APOBEC-3	7	7	0.131347	1.44225	649481	892873	775930	660522	332546	631637	574387	T	11	1	0.398706	0.52832	52179.2	LVQEGAQVAAMDLYEFKK|RMDPLSEEEFYSQFYNQR|DRPDLILHIYTSR|GKQHAEILFLDKIR|DCDSPVSLHHGVFK|RPFWPWK|GCLLSEK		0.20682	0	14.1072	0
Q99M87	Dnaja3	Mus musculus	DnaJ homolog subfamily A member 3, mitochondrial	3	3	0.131395	2.58212	282275	432553	363308	74391.3	56711.9	266169	314572	T	4	1	0.39816	1.36856	52410.4	GGPSVDPEELFR|AQGLYETINVTIPAGIQTDQK|EIFVTFR		0.08333	0.000503778	9.13062	4.14662e-05
P38647	Hspa9	Mus musculus	Stress-70 protein, mitochondrial	40	35	0.132086	1.12227	16301570	13540206	15614709	12370578	13096269	14723204	13759133	T	332	1	0.401029	0.166418	73415.6	ASEAIKGAVVGIDLGTTNSCVAVMEGK|STNGDTFLGGEDFDQALLR|EQQIVIQSSGGLSKDDIENMVK|VINEPTAAALAYGLDKSEDKVIAVYDLGGGTFDISILEIQK|AKCELSSSVQTDINLPYLTMDASGPK|NAVITVPAYFNDSQR|VQQTVQDLFGRAPSK|RYDDPEVQKDTK|DAGQISGLNVLR|ALLAGKDSETGENIR|AQFEGIVTDLIKR|VEAVNMAEGIIHDTETK|VQQTVQDLFGR|QAVTNPNNTFYATKR|QAASSLQQASLK|QATKDAGQISGLNVLR|QAVTNPNNTFYATK|TTPSVVAFTADGER|ASNGDAWVEAHGK|AQFEGIVTDLIK|VLENAEGAR|EMAGDNKLLGQFTLIGIPPAPR|GVPQI…	AMQDAEVSKSDIGEVILVGGMTR|LYSPSQIGAFVLMK|ETGVDLTKDNMALQR|MKETAENYLGHTAK|NTTIPTK	0.6701	0	25.428	0
Q9D071	Mms19	Mus musculus	MMS19 nucleotide excision repair protein homolog	2	2	0.132099	1.19386	181327	248943	192860	197998	168883	162660	162082	T	9	1	0.400455	0.255633	113017	LAEELHKGESDVAR|LLQAAAGASAR		0.02425	0	10.1519	0
Q9CY57	Chtop	Mus musculus	Chromatin target of PRMT1 protein	4	3	0.132127	1.23957	3.42191e+06	2259450	2.64749e+06	2.0599e+06	2.04058e+06	2573604	2192414	T	40	1	0.399974	0.309835	26568.4	ASMQQQQQLASAR|EQLDNQLDAYMSK|LAQQMENRPSVQAALK	NKQPMPVNIR	0.20884	0	15.4063	0
P47738	Aldh2	Mus musculus	Aldehyde dehydrogenase, mitochondrial	14	14	0.132213	0.918997	2698192	2485962	2.86912e+06	3041823	3059201	2.82927e+06	2746306	T	50	1	0.399598	-0.121868	56501.8	SAAATSAVPAPNHQPEVFCNQIFINNEWHDAVSR|LGPALATGNVVVMK|TFVQENVYDEFVER|YGLAAAVFTK|VVGNPFDSR|AAFQLGSPWR|LLCGGGAAADR|TIPIDGDFFSYTR|TEQGPQVDETQFKK|FKTIEEVVGR|TVTVKVPQK|TIEEVVGR|AAFQLGSPWRR|KILGYIK		0.29865	0	17.3092	0
P47754	Capza2	Mus musculus	F-actin-capping protein subunit alpha-2	6	4	0.132232	1.16163	1.49014e+06	1.53635e+06	1.47145e+06	1244999	1.09907e+06	1.53946e+06	1.31657e+06	T	43	1	0.398951	0.216157	32946.6	ADLEEQLSDEEKVR|FIIHAPPGEFNEVFNDVR|EATDPRPYEAENAIESWR|TSVETALR	LLLNNDNLLR|TKIDWNK	0.26224	0	17.4931	0
Q64737	Gart	Mus musculus	Trifunctional purine biosynthetic protein adenosine-3	57	56	0.132889	1.07724	15135938	15761574	14523169	14658081	13844968	14810862	12952627	T	376	1	0.399793	0.107342	107436	ISNAAVSVNDHSALAQFCKDEKIELVVVGPEAPLAAGIVGDLTSAGVR|ITEGDAVIGVASSGLHSNGFSLVR|AAGFKDPLLASGTDGVGTK|ATSRPGCSVDLGGFAGLFDLK|GVEITGFPEAQALGLQVFHAGTALKDGK|VKNLIETIQTNGSLVANGFLK|CFGPTAQAAQLESSKK|QVLVAPGNAGTACAGK|VKAFAHITGGGLLENIPR|TFNCGIGAALVVSKDQAEQVLHDVRR|SSLQYSSPAPGGCGDQTLGDLLLTPTR|VAVLISGTGSNLQALIDSTRDPK|AFTNPEDACSFITSANFPALVVK|FGDPECQVILPLLK|AFAHITGGGLLENIPR|LLDGDEGPNTGGMGAYCPAPQVSK|SSSHIVLVISNK|EFMDRH…	MLNIHPSLLPSFK	0.65347	0	23.2406	0
P13645	KRT10	Homo sapiens	Keratin, type I cytoskeletal 10	44	21	0.132948	0.540949	25564852	44417444	19413642	98434448	53814508	34643412	39334968	C	619	1	0.3992	-0.886435	58791.7	TIDDLKNQILNLTTDNANILLQIDNAR|YCVQLSQIQAQISALEEQLQQIR|NQILNLTTDNANILLQIDNAR|GSLGGGFSSGGFSGGSFSR|SKELTTEIDNNIEQISSYK|SKELTTEIDNNIEQISSYKSEITELR|NVQALEIELQSQLALK|SGGGGGGGGCGGGGGVSSLR|IRLENEIQTYR|AETECQNTEYQQLLDIK|SLLEGEGSSGGGGR|ELTTEIDNNIEQISSYK|ELTTEIDNNIEQISSYKSEITELRR|KNHEEEMKDLR|SQYEQLAEQNRKDAEAWFNEK|GSSGGGCFGGSSGGYGGLGGFGGGSFR|LKYENEVALR|SQYEQLAEQNR|SQYEQLAEQNRK|YENEVALR|IKEWYEKHGNSHQGEPR	NVSTGDVNVEMNAAPGVDLTQLLNNMR|ADLEMQIESLTEELAYLKK|VLDELTLTKADLEMQIESLTEELAYLKK|QSLEASLAETEGR|VTMQNLNDRLASYLDKVR|NHEEEMKDLR|QSVEADINGLR|ALEESNYELEGK|QSVEADINGLRR|ALEESNYELEGKIKEWYEK|LASYLDKVR|DAEAWFNEK|RVLDELTLTK|KDAEAWFNEK|VLDELTLTK|VTMQNLNDR|VTMQNLNDRLASYLDK|LAADDFR|IKEWYEK|LENEIQTYR|SEITELRR|LASYLDK|SEITELR	0.64384	0	27.4343	0
P08556|P32883	Nras|Kras	Mus musculus	GTPase NRas|GTPase KRas	2	0	0.133169	0.754993	263431	261023	363066	386364	521558	313954	354952	T	14	2	0.399407	-0.405464	21185.521743407182|21642.02878484284		LVVVGAGGVGK|SYGIPFIETSAK	0.12169|0.12169	0	11.1702	0
Q7TT50	Cdc42bpb	Mus musculus	Serine/threonine-protein kinase MRCK beta	3	3	0.133802	1.31604	279744	171921	170716	132910	145593	169297	168550	T	4	1	0.401087	0.396202	194630	RLEQEKLELSR|QGPTPAGLPR|LEDAAAEASKER		0.01926	0.000503778	10.1438	4.14662e-05
Q8CI11	Gnl3	Mus musculus	Guanine nucleotide-binding protein-like 3	16	16	0.134383	1.27851	2.31185e+06	1.99218e+06	2412295	1.37235e+06	1.65749e+06	2.32306e+06	1.75588e+06	T	39	1	0.402183	0.354465	60748.8	KDPGVPNSAPFKEALLR|KLEVSPGDEQSNVETREESDEPK|KQQLEELKQQQK|GFNLEELEKNNAHSIQVLKGPHLTNR|GFNLEELEKNNAHSIQVLK|KDPGVPNSAPFK|YTVPEYKDSLHFFTK|NAEISDVAPVEETR|SMQIVPLDK|SPASIEELRPLEAASAILSQADNEQVVLK|ELPTVVFK|LILVLNK|KVVPFQSK|QQLEELKQQQKLDR|DSLHFFTK|GGSPNVESAAK		0.33829	0	19.2836	0
Q8BWY9	Cip2a	Mus musculus	Protein CIP2A	9	9	0.134623	1.31925	1.55933e+06	1.26131e+06	1.16353e+06	802384	839226	1.15364e+06	1281566	T	23	1	0.402596	0.399721	101978	KNEELSVLLK|KMTFQPLNHGFSTSAK|SEANATQLLR|SLEPTAALLR|SLLLSISQYK|ALALAQADR|LQDLLEAK|KLESVAAEHEILTK|TLAGMLR		0.10364	0	12.1699	0
P97310	Mcm2	Mus musculus	DNA replication licensing factor MCM2	27	27	0.13498	1.13703	5576877	7059940	5576125	5570076	4.95006e+06	5392547	5.32939e+06	T	158	1	0.403654	0.185272	102013	ATEDGEEDEEMIESIENLEDLKGHSVR|FGAQQDTIEIPEKDLMDKAR|IFASIAPSIYGHEDIKR|GLALALFGGEPK|VAVGELTDEDVK|QINIHNLSAFYDSDLFK|ESLVVNYEDLAAR|ESMATGSIPITVR|FGAQQDTIEIPEKDLMDK|RDNNDLLLFILK|QLVAEQVTYQR|MITGLSKDQQIGEK|ISHLPLVEELR|QLHLNQLIR|VMMESFIDTQK|AGIVTSLQAR|LNQMDQDKVAR|THVDSHGHNVFKER|FDVLCVVR|EWVSMAGPR|VAVGELTDEDVKMITGLSKDQQIGEK|FVVGSHVR|NRFGAQQDTIEIPEKDLMDK|KYIIYAK|KLILQQF|TSGVVTSCTGVLPQLSMVK|ISDPLTSSPGR		0.33739	0	24.2542	0
P09411	Pgk1	Mus musculus	Phosphoglycerate kinase 1	21	16	0.13518	0.832628	5184943	6.27925e+06	6164830	6.335e+06	7.79197e+06	6.03769e+06	8.20403e+06	T	136	1	0.403655	-0.264255	44522	SVVLMSHLGRPDGVPMPDKYSLEPVAAELK|ALESPERPFLAILGGAK|SLSNKLTLDKLDVK|ITLPVDFVTADKFDENAK|SLLGKDVLFLK|VKAEPAKIDAFR|WNTEDKVSHVSTGGGASLELLEGK|AGGFLMKK|QIVWNGPVGVFEWEAFAR|SLMDEVVK|FCLDNGAK|YAEAVGR|TGQATVASGIPAGWMGLDCGTESSKK|ELNYFAK|LTLDKLDVK|FHVEEEGKGKDASGNK	VDFNVPMKNNQITNNQR|LGDVYVNDAFGTAHR|AHSSMVGVNLPQK|VDFNVPMK|FHVEEEGKGK	0.64508	0	19.2336	0
Q8CIE6	Copa	Mus musculus	Coatomer subunit alpha	32	32	0.135831	1.16347	7.56716e+06	8291414	7636242	7.56871e+06	5656621	7464398	6402097	T	161	1	0.405327	0.218438	138344	SGSKFPVFNMSYNPAENAVLLCTR|GVNWAAFHPTMPLIVSGADDR|GITGVDLFGTTDAVVK|VTTVTEIGKDVIGLR|RLLELGPKPEVAQQTR|GHYNNVSCAVFHPR|SSGLTAVWVAR|SGAWDESGVFIYTTSNHIK|LLELGPKPEVAQQTR|QLDFNSSKDVAVMQLR|QELILSNSEDKSIR|NLSPGAVESDVR|TLDLPIYVTR|KYDEVLHMVR|KLDALCNIHENIR|QELILSNSEDK|GITGVDLFGTTDAVVKHVLEGHDR|LVGQSIIAYLQK|VLTIDPTEFK|YAVTTGDHGIIR|ERPAYAVHGNMLHYVK|QLFLQTYAR|GFFEGSIASK|LLHDQVGVIQFGPYK|DADSITLFDVQQKR|ISPLQFR|AWEVDTC…		0.32516	0	18.3457	0
Q922V4	Plrg1	Mus musculus	Pleiotropic regulator 1	4	4	0.136012	1.36678	429934	298308	535756	355520	249120	339016	268590	T	15	1	0.40514	0.450781	56902	THDMFVADNGKPVPLDEESHK|ASVHTLSGHTNAVATVR|TGPAGSEYRHPGASDR|TGYNFQR		0.11891	0	18.1521	0
P97427	Crmp1	Mus musculus	Dihydropyrimidinase-related protein 1	4	1	0.136285	1.52228	107812	75180.5	109355	38662.1	89196.5	75077.4	61238.7	T	16	1	0.405297	0.606238	62128.6	NLHQSNFSLSGAQIDDNNPRR	QIGENLIVPGGVK|IFNLYPR|IVAPPGGR	0.08566	0	11.1155	0
Q8CFI0	Nedd4l	Mus musculus	E3 ubiquitin-protein ligase NEDD4-like	2	1	0.136618	1.5243	127163	182869	188081	148193	71414.5	142398	87915.5	T	9	1	0.405657	0.608143	115347	EWFFLLSK	LLDGFFIRPFYK	0.01992	0.00196464	8.22574	8.95759e-05
Q8K2T8	Paf1	Mus musculus	RNA polymerase II-associated factor 1 homolog	2	2	0.137303	1.20131	245289	200601	180502	159595	206021	160511	167343	T	6	1	0.407258	0.264603	60481.4	IDPNVLLDPADEKLLEEEIQAPTSSKR|VTPVEVMPVFPDFK		0.07664	0	11.1548	0
P62192	Psmc1	Mus musculus	26S proteasome regulatory subunit 4	27	26	0.137632	1.1374	6.7168e+06	5264801	5751152	5.07715e+06	4.9449e+06	5.743e+06	4.95643e+06	T	153	1	0.40793	0.185735	49153.7	VAEEHAPSIVFIDEIDAIGTK|TMLELLNQLDGFDSRGDVK|VHAVIGVLMDDTDPLVTVMK|MTLADDVTLDDLIMAKDDLSGADIK|VHAVIGVLMDDTDPLVTVMKVEK|RYDSNSGGEREIQR|AVANQTSATFLR|AICTEAGLMALR|VAEEHAPSIVFIDEIDAIGTKR|IKDYLLMEEEFIR|NQEQMKPLEEKQEEER|KIEFPLPDEK|SKENVLYK|LPLVTPHTQCR|VIMATNRIETLDPALIRPGR|VVGSELIQK|IFQIHTSR|IETLDPALIRPGR|KQEGTPEGLYL|MKVTNEDFKK|DDLSGADIK|YLGDGPK|KKYEPPVPTR|KIEFPLPDEKTK|GPDAASKLPLVTPHTQCR|YDSNSGGEREIQR	VIMATNR	0.60909	0	20.3517	0
P47757	Capzb	Mus musculus	F-actin-capping protein subunit beta	10	10	0.137943	1.11128	3.25903e+06	3224124	2.73169e+06	2815499	2.79765e+06	2899738	2.52294e+06	T	56	1	0.4086	0.152221	31325.8	NLSDLIDLVPSLCEDLLSSVDQPLK|SPWSNKYDPPLEDGAMPSAR|SDQQLDCALDLMR|SGSGTMNLGGSLTR|LVEDMENKIR|KLEVEANNAFDQYR|STLNEIYFGK|QMEKDETVSDCSPHIANIGR|TKDIVNGLR|LVEDMENK		0.48736	0	22.3357	0
Q8C1S0	Med19	Mus musculus	Mediator of RNA polymerase II transcription subunit 19	2	2	0.138045	0.537931	248393	343902	318398	978067	857959	374493	310842	T	23	1	0.408372	-0.894506	26246.5	EKLSNFLPDLPGMIDLPGSHDNSSLR|LHTGPLPEQCR		0.15164	0	12.0478	0
E9PVA8	Gcn1	Mus musculus	Stalled ribosome sensor GCN1	23	23	0.138458	1.22141	2.49512e+06	3.49353e+06	2.30063e+06	2206558	2.03734e+06	2.32829e+06	2.33888e+06	T	54	1	0.409197	0.288549	292834	SGAAQGLAEVMAGLGVEKLEK|NLLHSLQSSGVGSK|QAGAEALSQAVAR|HLDQIIPR|KLDAGNQLALIEELHKEIR|AYSDQAIVNLLK|LLTWVIGTGSPR|EGVLTGSPEQKEEAAK|ALLDNTKDKNTVVR|LTEVLTDSHVK|ASLLDPVPEVR|TLGTLVSHVTLR|LVLPSPDTDEKSGLSLLR|LYRPPPVLDALGR|LMQQLLESDKYAER|RGEELLQSLSK|AVMSNLSAHGVK|GAAYGLAGLVK|LSVADAQAEAK|MKIDPDAFITR|SPEVGMR|AIITALGVDRR|VVLPYLVPK		0.10895	0	20.3411	0
Q8C854	Myef2	Mus musculus	Myelin expression factor 2	14	14	0.138599	1.32859	2.89911e+06	2.20714e+06	3.19826e+06	1.63608e+06	2.06804e+06	2.78248e+06	1908311	T	70	1	0.408937	0.409895	63254.3	SIDVDRGFLSGPMGSGMR|VGEVTYVELFKDAEGK|LGSAMIGGFAGR|MGPGIGAILER|GCGVVEFKDEEFVKK|RDTHPGEPEKPPR|DFGRGDIGLSR|NLPFDLTWQK|EKVGEVTYVELFKDAEGK|WQAIKDLMR|GNQIFVR|MSSSFDR|FESAESAEK|MDDKSVPHEDYR		0.25719	0	17.262	0
Q60932	Vdac1	Mus musculus	Voltage-dependent anion-selective channel protein 1	6	6	0.138942	0.717479	884973	1.45373e+06	1713326	1.89949e+06	1.92471e+06	1.45204e+06	2.03917e+06	T	32	1	0.40957	-0.478992	32331.4	YQVDPDACFSAK|VNNSSLIGLGYTQTLKPGIK|LTFDSSFSPNTGKK|EHINLGCDVDFDIAGPSIR|VTQSNFAVGYK|GYGFGLIK		0.28378	0	13.2625	0
P84089	Erh	Mus musculus	Enhancer of rudimentary homolog	9	9	0.138984	0.850502	2.39606e+06	2218290	2463599	2.8243e+06	3.30896e+06	2.29918e+06	2.7452e+06	T	100	1	0.409053	-0.233614	12251	SHTILLVQPTK|SHTILLVQPTKRPEGR|TYADYESVNECMEGVCK|ADTQTYQPYNKDWIKEK|ADTQTYQPYNKDWIK|IYVLLRR|MYEEHLKR|ADTQTYQPYNK|MYEEHLK		0.625	0	17.3112	0
P32067	Ssb	Mus musculus	Lupus La protein homolog	18	18	0.139114	1.14457	3.46597e+06	4.00572e+06	3.72762e+06	3.06789e+06	2.95423e+06	3.83799e+06	3.23066e+06	T	77	1	0.408901	0.194809	47727	ICHQIEYYFGDFNLPR|YKDTNLLILFKEDYFAK|SPSRPLPEVTDEYKNDVK|NANNGNLLLR|FSGDLDDQTCREDLHFLFSNHGEIK|GSIFAVFDSIQSAKK|VLEGHAEKEALKK|ITDDQQESLNK|GSIFAVFDSIQSAK|KFVEIPGQK|FVEIPGQK|ITDDQQESLNKWK|VLEGHAEKEALK|EGIILFK|LMEVSADKTK|YKDTNLLILFK|FKGSHVFTAAR|MTALEAK		0.40964	0	16.2501	0
Q8K3A9	Mepce	Mus musculus	7SK snRNA methylphosphate capping enzyme	1	1	0.139221	1.56975	117827	50245.6	94291.8	51895.2	40072.3	71934.8	50604.7	T	1	1	0.408844	0.650534	72006.3	AAAPADVGEER		0.01652	0.00567644	8.0721	0.000536279
P35922	Fmr1	Mus musculus	Fragile X messenger ribonucleoprotein 1	12	9	0.140432	1.25749	1494740	1.0296e+06	1.31476e+06	916191	962982	1271600	912302	T	54	1	0.411345	0.330545	68946.9	TADGSLQSASSEGSR|VLVVSSIVAGGPQKPEPK|KVPGVTAIDLDEDTCTFHIYGEDQDAVKK|HLDTKENTHFSQPNSTK|DSIANATVLLDYHLNYLKEVDQLRLER|IKLEVPEDLR|MEELVVEVR|LIQEIVDKSGVVR|LIQEIVDK	EDLMGLAIGTHGANIQQAR|LQIDEQLR|GSNGAFYK	0.28176	0	15.2358	0
P16460	Ass1	Mus musculus	Argininosuccinate synthase	27	25	0.141157	1.20665	9613094	12913881	10686917	9139199	7528730	10199774	9798443	T	232	1	0.41334	0.271002	46555	TQDPAKAPNSPDVLEIEFKK|FAELVYTGFWHSPECEFVR|TQDPAKAPNSPDVLEIEFK|SPWSMDENLMHISYEAGILENPK|FELTCYSLAPQIK|GNDQVRFELTCYSLAPQIK|TTSLELFMYLNEVAGKHGVGR|VQVSVFKGQVYILGR|GVPVKVTNIKDGTTR|GRNDLMEYAK|FKGRNDLMEYAK|KVFIEDVSKEFVEEFIWPAVQSSALYEDR|QHGIPIPVTPK|HGVGRIDIVENR|NQAPPGLYTK|GQVYILGR|NDLMEYAK|YLLGTSLARPCIAR|VQVSVFK|IKQGLGLK|YLLGTSLAR|KGVPVKVTNIK|IDIVENR|GIYETPAGTILYHAHLDIEAFTMDREVR|RQVEIAQR	SPWSMDENLMHISYEAGILENPKNQAPPGLYTK|MPEFYNR	0.64563	0	28.248	0
P99028	Uqcrh	Mus musculus	Cytochrome b-c1 complex subunit 6, mitochondrial	2	2	0.141305	0.627139	374122	307789	200556	726092	460243	295115	431100	T	15	1	0.413624	-0.673143	10428	SQTEEDCTEELFDFLHAR|ERLELCDNR		0.30337	0	13.2999	0
Q923D5	Wbp11	Mus musculus	WW domain-binding protein 11	1	1	0.141558	0.727477	60706.9	70951	80301.4	106026	138127	81171.3	72921.3	T	3	1	0.413658	-0.459026	69830.8	TSAYGPPAR		0.01404	0.00243072	8.15676	0.000191696
Q3V1V3	Esf1	Mus musculus	ESF1 homolog	5	5	0.142058	0.820853	451048	447770	528049	697943	593852	456095	589279	T	15	1	0.415051	-0.284804	97987.7	GRPISHSTTEDLKR|KEELLIQAVER|GTTDLSVEALPK|SSKQEIMDDQR|FWEMPEKER		0.06746	0	11.1807	0
P46664	Adss2	Mus musculus	Adenylosuccinate synthetase isozyme 2	16	14	0.142142	1.11336	2.67822e+06	2.70838e+06	2.57956e+06	2.25484e+06	2.41073e+06	2739456	2.17098e+06	T	70	1	0.414563	0.154925	49989.6	AHIVFDFHQAADGIQEQQRQEQAGK|VVDLLAQDADIVCR|VGIGAFPTEQDNEIGELLQTR|MCDLVSDFDGFSER|TFKELPVNAQNYVR|DGVYFLYEALHGPPKK|TLPGWNTDISNAR|FIEDELQIPVK|DGVYFLYEALHGPPK|FIEDELQIPVKWIGVGK|KGIGPVYSSK|AHIVFDFHQAADGIQEQQR|GIGPVYSSK|VLANQYK	SRESMIQLF|RLIISDR	0.36623	0	17.2263	0
P62309	Snrpg	Mus musculus	Small nuclear ribonucleoprotein G	1	1	0.142406	0.849787	177308	183165	183042	268297	203537	201357	187800	T	8	1	0.415184	-0.234826	8490.43	GNSIIMLEALERV		0.17105	0	11.3704	0
Q8BG81	Poldip3	Mus musculus	Polymerase delta-interacting protein 3	17	17	0.142424	0.670056	3.09464e+06	2.2724e+06	2.83662e+06	4.75273e+06	6286660	2880968	3.11779e+06	T	79	1	0.414654	-0.577647	46103.7	RGNPASSNPPAEVDPDTVLR|FAATGSLVHHMTGLSSSK|SSGASVTTQPTEFK|VGIQHSLVNQPAR|ADLSLDELIRK|VTEEDIVELFCVCGALKR|ADLSLDELIR|LVHPGVAEVVFVK|VVQNDAYTAPVLPSSVR|CNLHMNGNVITSDQPILLR|RSPAAFTSPPIGTVTPALK|SPAAFTSPPIGTVTPALK|TIQVPQQK|ALTSMSR|AMVPLHAHPAGMR|CLDGQPMK|SRVGIQHSLVNQPAR		0.47619	0	17.3935	0
Q61753	Phgdh	Mus musculus	D-3-phosphoglycerate dehydrogenase	24	24	0.142833	1.07717	12008173	10293123	11243236	10216037	9950923	10487132	10804675	T	166	1	0.415149	0.107248	56549.1	AGTGVDNVDLEAATR|QNLSKEELIAELQDCEGLIVR|ALVDHENVISCPHLGASTK|VTADVINAAEKLQVVGR|GTIQVVTQGTSLK|VLISDSLDPCCR|AGTGVDNVDLEAATRK|SATKVTADVINAAEKLQVVGR|ILQDGGLQVVEK|CGEEIAVQFVDMVK|VTADVINAAEK|QIPQATASMKDGKWDR|TLGILGLGR|GGIVDEGALLR|KILQDGGLQVVEK|QADVNLVNAK|FMGTELNGK|SATKVTADVINAAEK|AFANLRK|MQSFGMK|VLISDSLDPCCRK|EASKQADVNLVNAK|GQPLLVFR|ALQSGQCAGAALDVFTEEPPRDR		0.43715	0	18.4371	0
Q3UQA7	Selenoh	Mus musculus	Selenoprotein H	1	1	0.143401	0.603522	105122	113418	100073	224240	276295	171868	89578.1	T	4	1	0.416283	-0.728522	12966.8	HAAALSQALQLEAPELPVQVNPSKPR		0.22414	0	15.1148	0
Q8BH69	Sephs1	Mus musculus	Selenide, water dikinase 1	3	3	0.143919	0.747456	240587	206819	204109	378107	337836	271918	202860	T	5	1	0.417303	-0.419939	42878.7	NEVSFVIHNLPVLAK|YGEGHQAWIIGIVEK|ESFNPETYELDKSFR		0.1148	0	10.2101	0
Q91WQ3	Yars1	Mus musculus	Tyrosine--tRNA ligase, cytoplasmic	5	5	0.144005	0.90473	461012	470119	546709	556813	546835	497579	573320	T	8	1	0.417012	-0.14444	59068.1	ILSVEKHPDADSLYVEKIDVGEAEPR|LGFVSCK|LASAAYPDPSK|LSSVVTQHDAK|YLPALGYSK		0.12121	0.000503778	9.1618	4.14662e-05
Q6DFV5	Helz	Mus musculus	Probable helicase with zinc finger domain	3	3	0.144585	1.46511	274867	478782	282667	295209	169371	279005	193190	T	4	1	0.418132	0.551012	219742	IVLAGDHMQLSPFVYSEFAR|LLNTAITR|ELIAPPK		0.01782	0	14.274	0
Q9JIF0	Prmt1	Mus musculus	Protein arginine N-methyltransferase 1	9	8	0.144853	0.765132	1.60636e+06	2559766	2.54868e+06	2475022	2.92598e+06	2.669e+06	3462043	T	59	1	0.418373	-0.38622	42407.9	KVIGIECSSISDYAVK|TGEEIFGTIGMRPNAK|DKWLAPDGLIFPDR|DVAIKEPLVDVVDPK|TGFSTSPESPYTHWK|ATLYVTAIEDR|ANKLDHVVTIIK|QLVTNACLIK	GKVEEVELPVEK	0.32615	0	18.2825	0
Q3URQ0	Tex10	Mus musculus	Testis-expressed protein 10	4	4	0.145273	1.12082	459409	562900	525929	436581	511280	440975	450265	T	13	1	0.419255	0.16455	105143	AIHLPEQLKEDR|LENATATNFK|NFVELISHQQLSK|LLGVSWR		0.04526	0	13.1579	0
O88545	Cops6	Mus musculus	COP9 signalosome complex subunit 6	3	3	0.145483	0.657801	226875	432748	189697	364427	382307	345769	547338	T	4	1	0.419287	-0.604276	35857	NIEVMNSFELLSHTVEEK|ASEAGEVPFNHEILR|IGVDHVAR		0.12654	0	15.1663	0
Q9CXY6	Ilf2	Mus musculus	Interleukin enhancer-binding factor 2	6	6	0.145539	1.2706	1090467	1.26761e+06	1.51684e+06	1.12205e+06	755052	1.09726e+06	1.10759e+06	T	26	1	0.418989	0.345514	43035.2	NQDLAPNSAEQASILSLVTK|KLDPELHLDIK|ILPTLEAVAALGNK|VKPAPDETSFSEALLKR|VLQSALAAIR|ILITTVPPNLR		0.21282	0	19.3147	0
Q6P5E4	Uggt1	Mus musculus	UDP-glucose:glycoprotein glucosyltransferase 1	3	3	0.145858	0.813986	259853	294429	341669	361008	407106	288479	416818	T	8	1	0.418863	-0.296924	176323	LGIEGLSLHNILK|ILETTTFFQR|FSALDSR		0.01934	0	10.2606	0
P49722	Psma2	Mus musculus	Proteasome subunit alpha type-2	3	3	0.146847	0.76442	364606	562575	590050	633710	767561	532729	676630	T	17	1	0.421627	-0.387562	25910.3	GYSFSLTTFSPSGK|SILYDER|AANGVVLATEKK		0.14103	0	12.1842	0
Q922Y1	Ubxn1	Mus musculus	UBX domain-containing protein 1	5	4	0.146975	0.834145	705753	764427	966559	1.05378e+06	1051280	956416	818224	T	22	1	0.421279	-0.261629	33552	AELTALESLIEMGFPR|LYVELHRGEEPGQDQDPVQLLSGFPR|QGQELSVAR|LPDGTSLTQTFR	MLELVAQK	0.23906	0	16.524	0
Q9CYL5	Glipr2	Mus musculus	Golgi-associated plant pathogenesis-related protein 1	1	1	0.147078	0.647911	73408.9	51854.5	32729.5	82769.6	92775.7	51634.5	89055.3	T	5	1	0.421083	-0.626131	17079.5	EAQQYSEALASTR		0.08442	0	11.1643	0
Q03265	Atp5f1a	Mus musculus	ATP synthase subunit alpha, mitochondrial	46	44	0.147922	0.942968	25195026	27307774	28650190	28650682	29320776	28906816	27733644	T	390	1	0.422864	-0.0847198	59715.6	EVAAFAQFGSDLDAATQQLLSR|ITKFENAFLSHVISQHQSLLGNIR|VVDALGNAIDGKGPIGSK|GMSLNLEPDNVGVVVFGNDK|HALIIYDDLSK|ILGADTSVDLEETGR|FENAFLSHVISQHQSLLGNIR|TGAIVDVPVGEELLGR|TGTAEMSSILEER|RTGAIVDVPVGEELLGR|TSIAIDTIINQKR|VVDALGNAIDGK|GIRPAINVGLSVSR|TSIAIDTIINQK|DNGKHALIIYDDLSK|NVQAEEMVEFSSGLK|DNGKHALIIYDDLSKQAVAYR|AVDSLVPIGR|RPPGREAYPGDVFYLHSR|LKEIVTNFLAGFEP|GYLDKLEPSKITK|VLSIGDGIAR|RLTDADAMK|EAYPGDVFYLHSR|RVGLKAPGI…	GMSLNLEPDNVGVVVFGNDKLIK|ISVREPMQTGIK	0.68897	0	21.326	0
Q3UA37	Qrich1	Mus musculus	Transcriptional regulator QRICH1	3	3	0.147996	3.05165	228995	199783	193740	50269.8	16564.9	198680	127845	T	9	1	0.422275	1.60959	86501.9	LYDFYLFK|NAELEKDAQNR|EQMGQMLTR		0.03604	0.000503778	9.15624	4.14662e-05
Q6PGH1	Bud31	Mus musculus	Protein BUD31 homolog	6	6	0.148345	0.69248	542582	891140	790756	1.33519e+06	1.37308e+06	811082	811596	T	20	1	0.422886	-0.530156	16988.6	KAPPDGWELIEPTLDELDQK|YIFDLFYK|KVESLWPIFR|ELYEYCIK|NLIAKWK|IIECTHCGCR		0.4375	0	10.1129	0
Q9EST5	Anp32b	Mus musculus	Acidic leucine-rich nuclear phosphoprotein 32 family member B	6	4	0.149745	0.749949	556336	784878	641256	1.16994e+06	863420	637494	899304	T	43	1	0.426526	-0.415136	31060.1	SLDLFGCEVTNR|LAEELPSLTHLNLSGNNLKDISTLEPLKR|LAEELPSLTHLNLSGNNLK|SDYRETVFR	ELVLDNCK|KLELSENR	0.24265	0	14.3131	0
Q99JB2	Stoml2	Mus musculus	Stomatin-like protein 2, mitochondrial	4	4	0.149833	0.883524	405804	324989	350349	433122	434815	393437	367213	T	10	1	0.426529	-0.178659	38361.2	ILAGALTQHNGDAAASLTVAEQYVSAFSK|ATVLESEGTRESAINVAEGKK|NTVILFVPQQEAWVVER|ESAINVAEGKK		0.1898	0	15.4167	0
Q9CWM4	Pfdn1	Mus musculus	Prefoldin subunit 1	2	2	0.150032	0.798664	214890	236014	284068	286573	318511	244636	385863	T	6	1	0.426321	-0.32434	14245.6	LADIQIEQLNR|AFTELQAK		0.15574	0	13.1984	0
Q8BX17	Gemin5	Mus musculus	Gem-associated protein 5	21	21	0.150289	1.23861	2.399e+06	3.32957e+06	2242075	2.1597e+06	1.76179e+06	2.24828e+06	2327123	T	73	1	0.426353	0.308724	166487	TVAEVQETLAEMIR|LSGEAFDINKLVR|SKEELHRDCLVLATATHAK|SMLPLSTSLDHR|LIAETPITK|LSGEAFDINK|VLALGNEDGSIEIFQVPNLR|KARSMLPLSTSLDHR|VVGELVGHTER|NAPVSLPELTR|IAEFPESVK|GPSSIYHQWATGSEGTLVQR|LWLTLHWPK|NFWQGVK|VGPGAGASPGAPPFR|LLSACKELFSER|SGGVDPTVKER|TSVFLVR|YKLPVHTEISWKGDGK|LSAESER|NDSQHLFTEPR		0.15712	0	17.3888	0
Q61136	Prpf4b	Mus musculus	Serine/threonine-protein kinase PRP4 homolog	3	3	0.150616	0.701058	338455	352881	492711	807893	608836	497509	387220	T	20	1	0.426457	-0.512395	116904	TKLDDLALLEDLEKQR|AELDNELMEGK|ISINQALQHAFIQEKI		0.0427	0	18.2362	0
P30999	Ctnnd1	Mus musculus	Catenin delta-1	19	19	0.150747	1.07876	3.1253e+06	2.94572e+06	2.89817e+06	3.01934e+06	2.68495e+06	2.81916e+06	2575980	T	69	1	0.426227	0.109374	104860	YQEALPTVANSTGPHAASCFGAK|HIEWESVLTNTAGCLR|TVQPVPMGPDGLPVDASAVSNNYIQTLGR|ALSAIAELLTSEHER|SDFQVNLNNASR|GYELLFQPEVVR|FHPEPYGLEDDQR|HAIPNLVK|FVGDADLER|APSRQDVYGPQPQVR|SQSSHSYDDSTLPLIDR|SLDNNYSTLNER|VGGSSVDLHR|GSLASLDSLRK|AAALVLQTIWGYK|IYISLLK|NLAVDAR|HYEDGYPGGSDNYGSLSR|NCDGVPALVR		0.27399	0	21.2888	0
P10107	Anxa1	Mus musculus	Annexin A1	9	9	0.150834	0.6626	599042	1.1095e+06	891132	1.36349e+06	1.92531e+06	925796	1.06177e+06	T	28	1	0.425925	-0.59379	38710	TPAQFDADELRGAMK|TPAQFDADELR|GVDEATIIDILTKR|SYKGGPGSAVSPYPSFNVSSDVAALHK|GGPGSAVSPYPSFNVSSDVAALHK|DLAKDITSDTSGDFRK|FLENQEQEYVQAVK|ALYEAGER|GVDEATIIDILTK		0.27168	0	13.1964	0
P04259	KRT6B	Homo sapiens	Keratin, type II cytoskeletal 6B	29	1	0.151635	0.599564	307799	347955	317228	1.03337e+06	632228	341766	381372	C	276	1	0.427952	-0.738013	60030.3	QLDNIVGER	ISIGGGSCAISGGYGSR|LALDVEIATYR|GSGGLGGACGGAGFGSR|NLDLDSIIAEVK|YEELQITAGR|TLNNKFASFIDKVR|VLDTKWTLLQEQGTK|SRGSGGLGGACGGAGFGSR|NKYEDEINKR|FASFIDKVR|LALDVEIATYRK|ADTLTDEINFLR|WTLLQEQGTK|TAAENEFVTLKK|KLLEGEECR|SRAEAESWYQTK|NKLEGLEDALQK|SGFSSISVSR|AQYEEIAQR|LLEGEECR|GRLDSELR|QNLEPLFEQYINNLRR|ASTSTTIR|FLEQQNK|SLYGLGGSKR|FASFIDK|ALYDAELSQMQTHISDTSVVLSMDNNR|QEIAEINR	0.49113	0	16.5471	0
Q8BWT1	Acaa2	Mus musculus	3-ketoacyl-CoA thiolase, mitochondrial	3	3	0.152416	1.24936	261204	229815	229170	145342	245386	195117	194418	T	3	1	0.429902	0.321189	41803.4	ALDLDPSKTNVSGGAIALGHPLGGSGSR|GVFIVAAK|HNFTPLAR		0.11083	0	12.1979	0
P06745	Gpi	Mus musculus	Glucose-6-phosphate isomerase	8	8	0.153034	0.670583	415452	842844	874696	864919	1.29485e+06	830782	1.09734e+06	T	24	1	0.431638	-0.576512	62727.2	KIEPELEGSSAVTSHDSSTNGLISFIK|HFVALSTNTAK|VDHQTGPIVWGEPGTNGQHAFYQLIHQGTK|TLASLSPETSLFIIASK|VWFVSNIDGTHIAK|LRELFEADPER|TFTTQETITNAETAKEWFLEAAKDPSAVAK|AVLHVALR		0.26523	0	15.2385	0
P63038	Hspd1	Mus musculus	60 kDa heat shock protein, mitochondrial	40	33	0.153046	0.868908	15787059	13892567	14734712	15228429	20500692	15924446	16859730	T	413	1	0.43107	-0.202725	60917.4	KPLVIIAEDVDGEALSTLVLNR|NQLKDMAIATGGAVFGEEGLNLNLEDVQAHDLGK|LVQDVANNTNEEAGDGTTTATVLAR|AAVEEGIVLGGGCALLR|KISSVQSIVPALEIANAHR|CEFQDAYVLLSEKK|ISSVQSIVPALEIANAHR|TLNDELEIIEGMK|IQEITEQLDITTSEYEKEK|VGGTSDVEVNEKKDR|NAGVEGSLIVEK|VGGTSDVEVNEK|LKVGLQVVAVK|IQEITEQLDITTSEYEKEKLNER|TVIIEQSWGSPK|GYISPYFINTSK|CEFQDAYVLLSEK|LSDGVAVLK|DGKTLNDELEIIEGMKFDR|VTDALNATR|VGGTSDVEVNEKK|SIDLKDKYK|VGEVIVTK|GQKCEFQDAYVLLSEKK|…	ALMLQGVDLLADAVAVTMGPK|RGVMLAVDAVIAELKK|GVMLAVDAVIAELKK|VGEVIVTKDDAMLLK|TLNDELEIIEGMKFDR|ALKIPAMTIAK|TALLDAAGVASLLTTAEAVVTEIPKEEKDPGMGAMGGMGGGMGGGMF	0.7836	0	24.2656	0
Q8VDN2	Atp1a1	Mus musculus	Sodium/potassium-transporting ATPase subunit alpha-1	20	14	0.153184	1.07574	5498599	4942883	4.70732e+06	4771181	4.4556e+06	4802101	4715663	T	135	1	0.431006	0.105335	112910	ACVVHGSDLKDMTSEELDDILR|SPDFTNENPLETR|AVAGDASESALLK|AVFQANQENLPILKR|KADIGVAMGIVGSDVSK|LNIPVNQVNPR|IVEIPFNSTNK|IVEIPFNSTNKYQLSIHKNPNASEPK|GIVVYTGDR|IISANGCKVDNSSLTGESEPQTR|TSATWFALSR|YQLSIHKNPNASEPK|YHTEIVFAR|YGTDLSR	GVGIISEGNETVEDIAAR|QGAIVAVTGDGVNDSPALKK|VIMVTGDHPITAK|LIIVEGCQR|AAVPDAVGK|IAGLCNR	0.24438	0	18.365	0
P01630		Mus musculus	Ig kappa chain V-II region 7S34.1	2	2	0.15329	0.407034	826201	238749	841860	1.04934e+06	589661	1925776	2.79067e+06	T	34	1	0.430753	-1.29678	12488.2	ISRVEAEDVGVYYCMQQREYPYTFGGGTK|VEAEDVGVYYCMQQREYPYTFGGGTK		0.25664	0	14.1696	0
Q9R1P0	Psma4	Mus musculus	Proteasome subunit alpha type-4	5	5	0.153322	0.754352	1.13238e+06	1.90878e+06	1807799	2435058	2.32606e+06	1.73201e+06	1.9374e+06	T	38	1	0.430265	-0.406689	29452.2	LSAEKVEIATLTR|LLDEVFFSEK|TTIFSPEGR|SALALAVK|QDYKEGEMTLK		0.1954	0	16.2352	0
Q9CPQ1	Cox6c	Mus musculus	Cytochrome c oxidase subunit 6C	3	3	0.154183	0.729401	513120	846086	818025	1.09461e+06	1.22271e+06	741448	895369	T	24	1	0.432277	-0.455216	8463.51	AGIFQSAK|NYDSMKDFEEMRK|AYAEFYR		0.36842	0.000503778	9.27062	4.14662e-05
Q04695	KRT17	Homo sapiens	Keratin, type I cytoskeletal 17	19	2	0.154268	0.4864	336816	637254	203142	1.17323e+06	1.10275e+06	579171	365901	C	151	1	0.432335	-1.03978	48076	LSGGLGAGSCR|ILTATVDNANILLQIDNAR	TEELNREVATNSELVQSGK|TRLEQEIATYRR|EVATNSELVQSGK|TRLEQEIATYR|LEQEIATYR|LASYLDKVR|VLDELTLAR|ALEEANTELEVK|NHEEEMNALR|TKFETEQALR|IRDWYQR|LAADDFR|CEMEQQNQEYK|ILNEMRDQYEK|ATMQNLNDR|LASYLDK|LEQEIATYRR	0.36111	0	16.365	0
P67984	Rpl22	Mus musculus	Large ribosomal subunit protein eL22	9	6	0.154531	1.09814	11040960	13512809	13010465	11461091	11739899	10811205	11446388	T	117	1	0.432628	0.135059	14749.8	SKITVTSEVPFSKR|AGNLGGGVVTIER|ITVTSEVPFSK|SKITVTSEVPFSK|VVANSKESYELR|ITVTSEVPFSKR	FTLDCTHPVEDGIMDAANFEQFLQER|NNLRDWLR|KNNLRDWLR	0.57813	0	23.3638	0
P60762	Morf4l1	Mus musculus	Mortality factor 4-like protein 1	3	3	0.155703	0.72486	352003	369603	480446	561600	822601	455785	426751	T	13	1	0.4359	-0.464225	41466.7	VLCFHGPLLYEAK|NVDSILEDYANYKK|YVDTNLQK		0.09669	0	10.1896	0
P60824	Cirbp	Mus musculus	Cold-inducible RNA-binding protein	6	6	0.155941	0.600716	876512	838248	1.03897e+06	2.0303e+06	2.49661e+06	1.33631e+06	790958	T	34	1	0.436275	-0.735246	18595.8	GFGFVTFENIDDAKDAMMAMNGK|YGQISEVVVVKDR|YGQISEVVVVK|YGQISEVVVVKDRETQR|SRGFGFVTFENIDDAKDAMMAMNGK|SQGGSYGYR		0.29651	0	17.2588	0
Q9JIK9	Mrps34	Mus musculus	Small ribosomal subunit protein mS34	5	5	0.156804	1.27631	858754	613061	660465	499805	434996	659493	642643	T	14	1	0.438292	0.351984	25810.7	VRPDYTAQNLDHGR|LVPKHEEEAFTAFTAKPEDR|AWGILTFK|AMILAER|LPLFGLGR		0.26147	0	13.2193	0
Q91WG2	Rabep2	Mus musculus	Rab GTPase-binding effector protein 2	1	1	0.157196	0.813252	52218.1	53563.6	69598.2	69113.7	58455.6	87249.1	73170.2	T	1	1	0.438745	-0.298226	62094.8	TLQGTVSQAQER		0.02166	0.000503778	9.10725	4.14662e-05
P19013	KRT4	Homo sapiens	Keratin, type II cytoskeletal 4	10	5	0.157233	0.311561	67745.9	495976	321435	1.56234e+06	1.28863e+06	435258	289129	C	37	1	0.438321	-1.68241	57249.8	SISMSVAGSR|VDSLNDEINFLK|GFSCGSAIVGGGKR|IISTTTLNK|QLDTLGNDKGR	NLDLDSIIAEVR|AQYEEIAQR|TAAENDFVVLKK|FASFIDK|SKAEAEALYQTK	0.20225	0	12.3454	0
Q9DB20	Atp5po	Mus musculus	ATP synthase subunit O, mitochondrial	17	15	0.157556	0.782086	6.80046e+06	9452647	8.07968e+06	12297232	12349025	8821110	8330409	T	178	1	0.438323	-0.3546	23348.7	VSLAVLNPYIK|LVRPPVQVYGIEGR|TDPSIMGGMIVR|YATALYSAASK|SFLSPNQILKLEIK|YATALYSAASKEK|VGQLLKDPK|VSLAVLNPYIKR|GEVPCTVTTASPLDDAVLSELK|SFLSPNQILK|LDQVEKELLR|VKSLNDITKR|LGNTQGIISAFSTIMSVHR|YVDMSAK|KLDQVEK	EKFSPLTANLMNLLAENGR|KLDQVEKELLR	0.76056	0	18.4142	0
Q9R0E1	Plod3	Mus musculus	Multifunctional procollagen lysine hydroxylase and glycosyltransferase LH3	10	9	0.158137	0.742582	916487	1.26196e+06	1.13339e+06	1.77129e+06	1.93451e+06	1.0882e+06	1.26528e+06	T	36	1	0.439628	-0.429377	84868.6	FLNSGGFIGFAPTIHQIVR|LVGPEEALSAGEAR|SEDYVELVQR|GANAVNPDKLLVITVATAETEGYRR|DKGIFLHLSNQHEFGR|TLGLGQEWR|AVMNFVVR|TLPGGQPPPR|VLIEQNR	KGWALLHPGR	0.17274	0	14.2076	0
Q3V300	Kif22	Mus musculus	Kinesin-like protein KIF22	5	5	0.158552	0.813379	407808	271613	333932	346168	455379	394904	452304	T	14	1	0.440157	-0.298001	73144.6	ALMDLLQLAR|LLDLLNEGSAR|SHAVLLVK|ELHGPFSEVEDLEQVEGISGK|TVEEKNLEIER		0.09242	0	10.2038	0
P47964	Rpl36	Mus musculus	Large ribosomal subunit protein eL36	15	12	0.158739	1.32425	7.82698e+06	5.2195e+06	7.82354e+06	4.32721e+06	4.28431e+06	6.52238e+06	5.87657e+06	T	172	1	0.440186	0.405178	12245.9	DMIREVCGFAPYER|ALRYPMAVGLNKGHK|DMIREVCGFAPYERR|REELSNVLAAMR|EELSNVLAAMR|EELSNVLAAMRK|EVCGFAPYER|EVCGFAPYERR|RAMELLK|FVRDMIR|REELSNVLAAMRK|YPMAVGLNKGHK	ALRYPMAVGLNK|KREELSNVLAAMR|YPMAVGLNK	0.50476	0	18.2782	0
Q6P5G6	Ubxn7	Mus musculus	UBX domain-containing protein 7	3	3	0.159299	0.841221	268992	344652	264606	376488	373624	353952	285884	T	8	1	0.44165	-0.249444	52131.8	AAHGGSAASSALK|EQITLPEQAK|FELLTNFPR		0.06852	0	17.2997	0
Q9CZ44	Nsfl1c	Mus musculus	NSFL1 cofactor p47	3	3	0.160165	0.740077	256583	278114	292268	276659	468256	296589	498065	T	4	1	0.443405	-0.434253	40685.4	SGQQIVGPPR|TGFSLDNGDLR|RGEVPAELRR		0.08378	0.000503778	9.15473	4.14662e-05
Q8CG47	Smc4	Mus musculus	Structural maintenance of chromosomes protein 4	31	31	0.160595	1.20781	6.21173e+06	4384318	5.09507e+06	4243482	3.69836e+06	5090625	4.22527e+06	T	117	1	0.443948	0.272394	146803	SLVHDLFQKVEEAK|FLILQGEVEQIAMMKPK|MGSSVIDEISVEEVNKMESQLER|FTQLDLEDVQVR|TAETSLPEIQKEHR|IHEDTKEITEK|LKLEQIDGHISEHNSK|LMITHIVNQNFK|SHGIDLDHNR|LHNTIIDINNRK|HNTAVSQLSK|NIEDKAEEVINNTK|LLEENVSVFKK|VIQENEHALQKDALSIK|KKEDLYLQR|AKEALITASETLKER|VAELDKITSERDNFR|QAMQIQEQK|RVEILNEHRGEK|EKEIQEKELMGFNK|ELEANVLTTAPDRK|TVINETTTR|IQTPENTPR|IPGIYGR|QLDECASAITK|VIQENEHALQK|SNVLSNEMK|SSLAMNR|IAEITTQKEK|NLLQELK|EYDAVAEK		0.27838	0	18.1692	0
Q7TQI3	Otub1	Mus musculus	Ubiquitin thioesterase OTUB1	7	7	0.160719	1.18756	1.23333e+06	1.52305e+06	1.10243e+06	1220354	1.06946e+06	1.10078e+06	923747	T	53	1	0.443522	0.248003	31250.4	AFGFSHLEALLDDSKELQR|IQQEIAVQNPLVSER|LLTSGYLQR|TRPDGNCFYR|VYLLYRPGHYDILYK|FFEHFIEGGR|KTRPDGNCFYR		0.29151	0	18.248	0
Q60605	Myl6	Mus musculus	Myosin light polypeptide 6	8	5	0.160746	0.880881	8483666	7.31775e+06	7.16209e+06	8057028	10148245	8289748	8315565	T	82	1	0.442906	-0.182981	16919.1	NKDQGTYEDYVEGLR|HVLVTLGEK|VLGNPKSDEMNVK|EAFQLFDR|SDEMNVK	VLDFEHFLPMLQTVAK|ALGQNPTNAEVLK|ILYSQCGDVMR	0.56291	0	18.2958	0
Q8N1N4	KRT78	Homo sapiens	Keratin, type II cytoskeletal 78	7	5	0.160967	0.465014	185429	516184	202503	1.00475e+06	992849	364058	306601	C	55	1	0.443098	-1.10465	56830.5	YLDFSSIITEVR|VQISQLHQEIQR|TLNNQFASFIDKVR|ATLENDFVVLKK|DVDGVFLSK	LLEGEECR|FLEQQNK	0.14231	0	12.2714	0
P59325	Eif5	Mus musculus	Eukaryotic translation initiation factor 5	6	6	0.1612	0.716461	396788	640886	738334	814350	1.0569e+06	626130	757137	T	22	1	0.443105	-0.481039	48937.7	TVIVNMVDVAK|VNILFDFVK|GLTLSDDLER|FVLCPECENPETDLHVNPK|LCTFILK|SVSDQFYR		0.14918	0	11.068	0
Q9CZN7	Shmt2	Mus musculus	Serine hydroxymethyltransferase, mitochondrial	20	18	0.161499	0.867273	3.98753e+06	4748853	4922341	4849588	6.18422e+06	4.88617e+06	5097656	T	166	1	0.443158	-0.205441	55723.6	AHLLADMAHISGLVAAK|IMGLDLPDGGHLTHGYMSDVKR|VLELVSITANKNTCPGDR|GYSLVSGGTDTHLVLVDLRPK|VLELVSITANK|AALEALGSCLNNK|LIIAGTSAYAR|YADVVTTTTHK|LGAPALTSR|SAITPGGLR|SFLLKDPETSQR|QQVEQFAR|YYGGAEVVDEIELLCQRR|GFPMPGFDER|AALEALGSCLNNKYSEGYPGKR|NAQAMADALLK|SGLIFYR|VIPSPFK	ISATSIFFESMPYK|MREVCDEVR	0.46825	0	19.1585	0
Q61081	Cdc37	Mus musculus	Hsp90 co-chaperone Cdc37	3	3	0.161517	0.786114	517430	337953	494422	458670	553947	587486	670655	T	13	1	0.442661	-0.34719	44564.9	SGEAKEGEEAGPGDPLLEAVPK|LGPGGLDPVEVYESLPEELQK|AMKEYEEEER		0.13984	0	18.1666	0
P29758	Oat	Mus musculus	Ornithine aminotransferase, mitochondrial	8	8	0.161569	0.840195	986980	1.29908e+06	1.33956e+06	1.45822e+06	1.66254e+06	1.30212e+06	1.30749e+06	T	27	1	0.442166	-0.251204	48323.9	KTEQGPPSSEYIFER|IVFADGNFWGR|HQVLFIADEIQTGLAR|YGAHNYHPLPVALER|LAPPLVIKEDEIRESVEIINK|GLLNAIVIR|LRDNGLLAKPTHGDIIR|SQVDKLTLTSR		0.26196	0	12.1895	0
Q9JIX0	Eny2	Mus musculus	Transcription and mRNA export factor ENY2	2	2	0.161778	0.68661	388320	357588	192216	527268	502085	318855	425180	T	7	1	0.441963	-0.542438	11521.3	GLEHVTVDDLVAEITPK|TFLAQHASL		0.25743	0	16.3667	0
Q8C0D4	Arhgap12	Mus musculus	Rho GTPase-activating protein 12	2	2	0.161853	0.827962	133825	138781	127093	154541	205701	129376	162608	T	3	1	0.441459	-0.272364	95293.8	LFGHFPGPEFLDIEK|LQEPIVLTK		0.02864	0	9.07369	0
Q91ZJ5	Ugp2	Mus musculus	UTP--glucose-1-phosphate uridylyltransferase	1	1	0.161952	1.26923	173126	163519	227117	160916	143198	112114	178327	T	2	1	0.441092	0.343953	56943.7	LVEIAQVPK		0.01772	0.000503778	9.15495	4.14662e-05
Q8BHK9	Ercc6l	Mus musculus	DNA excision repair protein ERCC-6-like	1	1	0.161969	1.88507	133828	66573.1	85637.2	51649.8	22538.9	94029.2	50439.5	T	1	1	0.440466	0.914619	138768	GLQASPGQEAPSENLGSFHYLPR		0.01855	0	11.146	0
P57784	Snrpa1	Mus musculus	U2 small nuclear ribonucleoprotein A'	9	9	0.16242	1.15055	1.49768e+06	1.38908e+06	1.5634e+06	1.43043e+06	1.07298e+06	1.25469e+06	1.42802e+06	T	36	1	0.441441	0.202329	28340.1	GGPSAGDVEAIKNAIANASTLAEVER|VKLTAELIEQAAQYTNAVR|NAIANASTLAEVER|GLLQSGQIPGR|TLLVNNNR|GGPSAGDVEAIK|SLTYLSILR|LKTLLVNNNR|GLLQSGQIPGRER		0.30196	0	17.1657	0
P39447	Tjp1	Mus musculus	Tight junction protein ZO-1	5	5	0.162716	0.780216	503554	287538	325285	464101	518461	457254	417185	T	9	1	0.441609	-0.358055	194622	EAGFLRPVTIFGPIADVAR|EISQDSLAAR|YRPEAQPYSSTGPK|TSTLRHEEQPAPAYEVHNR|EGLEEGDQILRVNNVDFTNIIR		0.04814	0	10.1827	0
P48432	Sox2	Mus musculus	Transcription factor SOX-2	6	3	0.163504	1.16421	606451	612090	835163	607513	559990	552179	608000	T	12	1	0.443728	0.21935	34431.6	SEASSSPPVVTSSSHSR|APCQAGDLR|APCQAGDLRDMISMYLPGAEVPEPAAPSR	RPMNAFMVWSR|RPFIDEAKR|ALHMKEHPDYK	0.24138	0	13.1585	0
Q9DCE5	Pak1ip1	Mus musculus	p21-activated protein kinase-interacting protein 1	7	7	0.16372	0.859128	1.07069e+06	1.15478e+06	1.12703e+06	1.46742e+06	1.33776e+06	1.40067e+06	1.03904e+06	T	29	1	0.443689	-0.219055	42089.4	GHVTFLSIHPSGK|LTCLTVWLDR|LALSVGTDK|LGTASVSGTITNGKR|VKDMVSFEVPDHHVLVTASNDGFIK|KVEHGALVHHAGTVTCLK|TWNLIEGR		0.25654	0	14.1752	0
Q6PE01	Snrnp40	Mus musculus	U5 small nuclear ribonucleoprotein 40 kDa protein	6	6	0.164564	1.14922	858032	1.08802e+06	813138	754714	801651	872714	751884	T	23	1	0.445963	0.200659	39250.7	HELLLGAAGAGPGAGPQQATPGALLQAGPPR|LPGHAGSINEVAFHPDEPIILSASSDKR|VLYKLPGHAGSINEVAFHPDEPIILSASSDKR|VWDVRPFAPK|IFQGNVHNFEK|KGPELPLVPVK		0.26536	0	26.406	0
P26638	Sars1	Mus musculus	Serine--tRNA ligase, cytoplasmic	5	5	0.16463	0.667288	304270	338754	326651	377299	774822	311863	601449	T	10	1	0.445335	-0.583619	58351.7	FKDPGLVDQLVK|VLDLDLFR|VDKGGDPALIR|KLDLEAWFPGSGAFR|LLIDEAIQK		0.10742	0	10.2799	0
Q9D358	Acp1	Mus musculus	Low molecular weight phosphotyrosine protein phosphatase	5	5	0.164767	0.855956	919347	797694	752388	922438	1.16407e+06	934101	840546	T	43	1	0.445148	-0.224391	18179.9	QITKEDFATFDYILCMDESNLR|SVLFVCLGNICR|SPIAEAVFR|AKIELLGSYDPQK|HGIHMQHIAR		0.41772	0	15.3227	0
Q9CZ13	Uqcrc1	Mus musculus	Cytochrome b-c1 complex subunit 1, mitochondrial	16	15	0.164924	0.936013	3.03836e+06	2821528	2.60915e+06	3113061	2946218	3.05669e+06	2.92863e+06	T	97	1	0.444949	-0.0953991	52818.5	NALVSHLDGTTPVCEDIGR|TATFAQALQSVPETQVSILDNGLR|NRPGNALEKEVESIGAHLNAYSTR|MVLAAAGGVEHQQLLDLAQK|RIPLAEWESR|LCTSATESEVTR|TDLTDYLNR|VYEEDAVPGLTPCR|NNGAGYFLEHLAFK|SGMFWLR|VVELLADIVQNSSLEDSQIEKERDVILR|YETEKNNGAGYFLEHLAFK|IPLAEWESR|EHTAYLIK|IQEVDAQMLR	FTGSEIR	0.43958	0	20.3112	0
Q63844	Mapk3	Mus musculus	Mitogen-activated protein kinase 3	3	1	0.165445	0.56491	14448.8	44101.6	43537.9	58594.1	67209.5	35427.7	59110	T	8	1	0.445734	-0.823906	43039.1	LKELIFQETAR	APEIMLNSK|ISPFEHQTYCQR	0.08421	0	10.121	0
Q61881	Mcm7	Mus musculus	DNA replication licensing factor MCM7	28	28	0.165722	1.13731	8168012	9265237	7601069	7288660	6303263	7801752	7.97778e+06	T	151	1	0.445994	0.185621	81159.5	LFGDVVQELLPEYKEK|IAQPGDHVSVTGIFLPVLR|SLEQNVQLPAALLSR|SITVVLEGENTR|TAIHEVMEQQTISIAK|EVVNKDVLDVYIEHR|SRDPGAVRNPQNQYPSELMR|GSSGVGLTAAVLR|LMEMSKDSLLGEK|FLQEFYYENELGKK|ALKDYAIEKEK|IQEHSDQVPVGNIPR|TQRPADVIFATIR|CSILAAANPAYGR|LAQHITYVHQHSR|RFELYFR|MVDIVEKEDVNEAIR|ALKDYAIEK|FDLLWLIQDRPDRDNDLR|SQLLSYIDRLAPR|SQLLSYIDR|QPPAQFEPLDMK|TLLAILR|FLQEFYYENELGK|AGILTTLNAR|RYIAMCHER|YGTQLVHLAHR|SVHFSEAEQR		0.45897	0	20.1665	0
Q9ES00	Ube4b	Mus musculus	Ubiquitin conjugation factor E4 B	7	7	0.166053	1.1476	794774	839511	809398	853618	610170	724361	672061	T	13	1	0.446764	0.198622	133232	KLLDQLTDIYLQLDCAR|INATMEDVNER|QVQKPFLRPELGPR|LLAEKVEEIVAK|SQCISHTALVLQGSLTQPR|IHEVQEEMKNKEQWDQLPR|ITLPNDETR		0.0861	0	14.0946	0
Q9JKY0	Cnot9	Mus musculus	CCR4-NOT transcription complex subunit 9	5	5	0.166677	1.32491	864308	1.29015e+06	864311	622221	647461	1.02235e+06	750119	T	19	1	0.448464	0.4059	33579.9	MHSLATAAPVPTALAQVDREK|IYQWINELSSPETR|ENALLELSK|NLQEGQVTDPR|WLAQLVK		0.20736	0	19.1726	0
Q9JHS9	Cwc15	Mus musculus	Spliceosome-associated protein CWC15 homolog	3	3	0.166877	0.72221	405149	302189	425736	595512	722032	465658	357444	T	8	1	0.448625	-0.46951	26608.3	GKGEGDLSQLSK|FVNDTLR|TTAARPTFEPAR		0.13537	0.0061263	8.14801	0.000577028
Q9CS42	Prps2	Mus musculus	Ribose-phosphate pyrophosphokinase 2	5	1	0.167311	0.653464	56926.9	56612.5	29377.9	85336.6	50200.3	56575.4	97643.9	T	34	1	0.449526	-0.613821	34764	PNIVLFSGSSHQDLSQR	VYAILTHGIFSGPAISR|THNGESVSYLFSHVPL|MVLVGDVKDR|VTAVIPCFPYAR	0.22642	0	19.2637	0
Q8BML9	Qars1	Mus musculus	Glutamine--tRNA ligase	31	30	0.167637	1.163	6.12945e+06	8.1942e+06	6.65018e+06	5.99883e+06	5177949	6.52387e+06	6.25116e+06	T	158	1	0.449947	0.217856	87620.9	AMAVLEPLQVVITNFPAPKPLDIR|TPGYVITPYTMDLLK|DRPKEESLLLFEAMR|LGYFSVDPDSHQGQIVFNR|ATGVLLYDLVSR|HTGYVIELQNIVR|FNMGLLMGEAR|AFIHWVSQPLVCEIR|SDFKEESEPGYKR|VPNFPADETKGFHQVPFASTVFIER|TVTLKEDPGKI|GFHQVPFASTVFIER|LASGQPVGLR|QHLEITGGQVR|AINFNFGYAK|MKLVMEDGKMDPVAYR|FAEGEATLR|ETLKNEALSTQLR|DVLNDAAPR|GKFAEGEATLR|DVVEKGEVAGQTLSLMEQLRGEALK|LVMEDGKMDPVAYR|SFLVSYIANKK|EAATQAHQILGSTIDK|LFTLTALR|YRFNMGLLMGEAR|LNLHYAVVS…	MIKNEVDMQVLHLLGPK	0.4671	0	19.2722	0
P52927	Hmga2	Mus musculus	High mobility group protein HMGI-C	1	1	0.167688	0.724773	190877	192468	198950	386457	322087	224332	184091	T	8	1	0.449472	-0.464398	11812.1	GEGAGQPSTSAQGQPAAPVPQKR		0.21296	0	11.3478	0
P40142	Tkt	Mus musculus	Transketolase	21	19	0.168219	0.745551	2.37267e+06	3.10989e+06	3.83827e+06	3.33691e+06	4925329	3325004	5.11298e+06	T	101	1	0.450258	-0.42362	67587.6	SKDDQVTVIGAGVTLHEALAAAESLKK|ILATPPQEDAPSVDIANIR|LGQSDPAPLQHQVDIYQKR|HQPTAIIAK|KAYGLALAK|IIALDGDTK|LQALKDTANR|LDNLVAIFDINR|ISSDLDGHPVPK|VLDPFTIKPLDR|VLDPFTIKPLDRK|KLILDSAR|AVELAANTK|GITGIEDKEAWHGKPLPK|LAVSQVPR|MEGYHKPDQQK|NSTFSELFK|LILDSAR|NSTFSELFKK	MFGIDKDAIVQAVK|MPTPPSYK	0.35955	0	17.2119	0
Q9CZT4	Polr3e	Mus musculus	DNA-directed RNA polymerase III subunit RPC5	1	1	0.168478	1.31789	43311.4	30849.2	38592.3	29800.4	19620.1	35257.6	30862.4	T	1	1	0.450371	0.398235	79803.3	FSRPESEQAR		0.01408	0.00747314	8.15238	0.000660665
Q6PFR5	Tra2a	Mus musculus	Transformer-2 protein homolog alpha	5	5	0.16905	1.25419	393822	622281	392637	344617	392204	327447	402648	T	7	1	0.451729	0.326757	32296.9	GFAFVYFER|YGPLSGVNVVYDQR|IDDSKEAMER|IRVDYSITKR|SRGFAFVYFER		0.16014	0.000503778	9.17495	4.14662e-05
O88477	Igf2bp1	Mus musculus	Insulin-like growth factor 2 mRNA-binding protein 1	36	32	0.170067	1.29547	14274976	10397920	15299706	8662949	8387366	13247510	11010407	T	242	1	0.454724	0.373477	63411.2	TVNELQNLTAAEVVVPR|LYIGNLNESVTPADLEK|TADEVPLKILAHNNFVGR|ITISSLQDLTLYNPER|LLVPTQYVGAIIGK|SGYAFVDCPDEHWAMK|DQTPDENDQVIVK|AIETFSGKVELQGK|VSYIPDEQITQGPENGRR|TADEVPLK|KIRDILAQVK|AISVHSTPEGCSSACK|LNGHQLENHALK|LYIGNLNESVTPADLEKVFAEHK|VSYIPDEQITQGPENGR|IIGHFYASQMAQR|QQPVDIPLR|KVEQDTETKITISSLQDLTLYNPER|IAPPETPDSKVR|RLEIEHSVPKK|LKEENFFGPKEEVK|NLKKVEQDTETK|IAPPETPDSK|GQSNLAQAR|AIETFSGK|ISYSGQFLVK|GAIENCCRAEQ…	MVVITGPPEAQFK|QGSPVAAGAPAK|ILAHNNFVGR|MILEIMHK	0.58752	0	20.4665	0
Q9ER72	Cars1	Mus musculus	Cysteine--tRNA ligase, cytoplasmic	6	6	0.170654	0.893753	713854	618607	551974	698713	664228	681521	754438	T	14	1	0.456127	-0.162052	94800	LATEPLEQAVR|NKDVFIPQDGKK|LYNSLTR|TAVHEALCDNIDTR|LVPEAVGDQK|VQALDQHLSTR		0.07822	0	12.2635	0
P34884	Mif	Mus musculus	Macrophage migration inhibitory factor	4	3	0.170868	0.734335	955937	1.41699e+06	953199	1.36831e+06	2.01435e+06	1071204	1.63759e+06	T	22	1	0.456242	-0.44549	12496.2	LLCGLLSDR|LHISPDR|LLCGLLSDRLHISPDR	PMFIVNTNVPR	0.23478	0	12.2257	0
Q91W67	Ubl7	Mus musculus	Ubiquitin-like protein 7	1	1	0.171158	1.07511	106906	102017	98291	102570	97519.3	87134.8	94219.9	T	2	1	0.456116	0.104482	40408.3	LADQPLAPK		0.02368	0	10.0937	0
Q64514	Tpp2	Mus musculus	Tripeptidyl-peptidase 2	10	10	0.1715	1.06818	1.3122e+06	1245343	1184902	1.17844e+06	1.08363e+06	1.1691e+06	1.24169e+06	T	40	1	0.456687	0.0951514	139791	LSTMETGTGLIR|VPITAVIAAK|LHQLDAEKER|KETGASSFLCR|ACVDSNENGDLSK|VALAEACR|ANNVDYTVHSVR|GVLIAVLDTGVDPGAPGMQVTTDGKPK|FVLHAVQLVK|VLIFAYK		0.09509	0	13.2521	0
P10852	Slc3a2	Mus musculus	Amino acid transporter heavy chain SLC3A2	12	12	0.172247	0.85474	1.60714e+06	1.91255e+06	2.16465e+06	1.91012e+06	2113999	2.44508e+06	2.37472e+06	T	48	1	0.458332	-0.226442	58300.3	SLLHGDFHALSSSPDLFSYIR|LGASNLPAGISLPASAK|IGDLQAFVGR|SHLEYLSTLK|LLLSTDSAR|YLVVLNFR|VAEDETEAGVK|NQKDEINETDLK|FTGLSKEELLK|MKEALSSWLQDGVDGFQFR|GLVLGPIHK|APLMPWNESSIFHIPRPVSLNMTVK		0.30798	0	17.2385	0
P70296	Pebp1	Mus musculus	Phosphatidylethanolamine-binding protein 1	4	4	0.172878	0.745419	517905	573456	669569	544230	997064	698675	991620	T	10	1	0.459277	-0.423877	20817.3	VDYAGVTVDELGK|LYEQLSGK|FREWHHFLVVNMK|GNDISSGTVLSDYVGSGPPSGTGLHR		0.32086	0.000503778	9.16701	4.14662e-05
Q8C1A5	Thop1	Mus musculus	Thimet oligopeptidase	20	20	0.172923	1.12046	2.67814e+06	3092346	2.84532e+06	2.35291e+06	2.3185e+06	2.78322e+06	2.82307e+06	T	84	1	0.458736	0.164095	77976.2	VDQVLHTQTDADPAEEYAR|TSILRPGGSEDASAMLK|TGSEAPQDLLEK|TSQTVATFLDELAQK|MKPPAACAGDVVDAASPASTVNHLR|QANAGLFNLR|WDLSAQQIR|LSLLCIDFNK|NILDFPQHVSPCKDIR|DAASGEEIGKFYLDLYPR|YYMNQVEETR|QFLGRDPKQDAFLLSK|LLEEAFNCR|VGAQNFEDVSYESTLK|YGHAACFGLQPGCLR|VVWLQEK|AASTEADKKLSEFDVEMSMR|EYFPMQVVTR|VDQNLLKEYFPMQVVTR|GLPFDGR		0.3901	0	15.293	0
P08775	Polr2a	Mus musculus	DNA-directed RNA polymerase II subunit RPB1	18	17	0.172923	1.08667	1.8247e+06	1.74406e+06	1.93281e+06	1.86676e+06	1.59082e+06	1.71969e+06	1.58258e+06	T	32	1	0.458131	0.119914	217039	INISQVIAVVGQQNVEGK|AHNNELEPTPGNTLR|INAGFGDDLNCIFNDDNAEKLVLR|GFVENSYLAGLTPTEFFFHAMGGR|TAETGYIQR|TLQEDLVKDVLSNAHIQNELEREFER|VLSEKDVDPVR|NSINQVVQLR|QTFENQVNR|LTHVYDLCK|MREDREVLR|VQFGVLSPDELKR|ISPWLLR|NVTLGVPR|ILLSPER|ILPWSTFR|LGGLMDPR	YSPTSPTYSPTSPK	0.12335	0	16.1033	0
Q6P8I4	Pcnp	Mus musculus	PEST proteolytic signal-containing nuclear protein	2	2	0.172946	0.731656	156992	237305	276811	294810	341531	215736	360607	T	5	1	0.457566	-0.450762	18951.4	SAEDEAADLPTKPTK|ETVPTLAPK		0.13483	0.00827586	8.10556	0.000715741
Q9JI75	Nqo2	Mus musculus	Ribosyldihydronicotinamide dehydrogenase [quinone]	2	1	0.173126	0.824865	198049	145566	221429	223771	208322	260383	210736	T	3	1	0.457488	-0.27777	26231.3	VAVEELSK	VLIVYAHQEPK	0.08225	0.000503778	9.11503	4.14662e-05
Q9QYL7	Abt1	Mus musculus	Activator of basal transcription 1	1	1	0.174065	0.649562	58688.1	28788.2	67148.1	103968	80604.4	54875.1	67082.8	T	2	1	0.459673	-0.62246	30639.9	LANVEDQAR		0.03346	0.000503778	9.12244	4.14662e-05
P58802	Tbc1d10a	Mus musculus	TBC1 domain family member 10A	1	1	0.174126	0.686897	49064.3	34948.5	20130.1	54988.5	45063.5	38639.7	52725.7	T	1	1	0.459071	-0.541834	56166.8	ENGPREPAAGGSLSGTR		0.034	0.00335731	8.10717	0.000301882
Q60759	Gcdh	Mus musculus	Glutaryl-CoA dehydrogenase, mitochondrial	4	4	0.174589	1.69304	162412	181577	143681	77591	140911	158675	48102.6	T	5	1	0.459669	0.759616	48574.8	DILGGNGISDEYHVIR|HNPSNQSYTLSGTK|HAMNLEAVNTYEGTHDIHALILGR|IQFGVPLAR		0.14384	0	11.1356	0
Q9CWS0	Ddah1	Mus musculus	N(G),N(G)-dimethylarginine dimethylaminohydrolase 1	5	4	0.175037	1.23337	463593	357484	561703	322635	370811	435510	349917	T	15	1	0.460591	0.302604	31360.9	AGLGHPSAFGR|SQGEEVDFAR|LKDHLLIPVSNSEMEKVDGLLTCCSVFINK|TPEEYPESAK	EFFVGLSK	0.24211	0	14.3654	0
P63001	Rac1	Mus musculus	Ras-related C3 botulinum toxin substrate 1	7	3	0.175115	0.909208	2.05558e+06	2.21511e+06	1.97162e+06	2444205	2.4872e+06	2.06993e+06	2.16977e+06	T	37	1	0.460146	-0.137318	21436.2	KLTPITYPQGLAMAK|LTPITYPQGLAMAK|HHCPNTPIILVGTK	YLECSALTQR|AVLCPPPVK|LDLRDDKDTIEK|TVFDEAIR	0.35417	0	13.1219	0
P14115	Rpl27a	Mus musculus	Large ribosomal subunit protein uL15	11	10	0.175441	1.25358	7067514	4.83244e+06	4496391	3.62209e+06	4.05682e+06	4.98988e+06	4.54178e+06	T	121	1	0.46047	0.326049	16595	NQSFCPTVNLDKLWTLVSEQTR|RNQSFCPTVNLDKLWTLVSEQTR|NKTGVAPIIDVVR|TGVAPIIDVVR|NQSFCPTVNLDK|LWTLVSEQTR|IKGVGGACVLVA|SGYYKVLGK|YHPGYFGK|GVGGACVLVA	INFDKYHPGYFGK	0.47297	0	22.3091	0
Q6ZQ88	Kdm1a	Mus musculus	Lysine-specific histone demethylase 1A	6	6	0.175617	1.08279	853647	846595	806553	816433	692942	827032	757074	T	10	1	0.460238	0.114748	92792.6	VIIIGSGVSGLAAAR|NYPATVHGALLSGLR|HGLINFGIYKR|TQEELKELLNK|LFFAGEHTIR|QVNMELAK		0.08206	0	12.119	0
P58059	Mrps21	Mus musculus	Small ribosomal subunit protein bS21m	1	1	0.176155	2.33179	183339	202932	153353	139001	27773	189308	47187.9	T	2	1	0.461445	1.22144	10554.4	ILTTDGLTEVISR		0.14943	0	13.3303	0
Q60930	Vdac2	Mus musculus	Voltage-dependent anion-selective channel protein 2	7	7	0.177118	1.19124	2577111	3.70558e+06	3711773	2808740	2.46894e+06	2.81496e+06	2.96207e+06	T	40	1	0.463246	0.25247	31712.6	VNNSSLIGVGYTQTLRPGVK|YQLDPTASISAK|LTFDTTFSPNTGKK|LTLSALVDGK|DIFNKGFGFGLVK|GFGFGLVK|SNFAVGYR		0.26102	0	17.2433	0
Q9CY27	Tecr	Mus musculus	Very-long-chain enoyl-CoA reductase	7	6	0.177722	1.19405	2.15022e+06	1.71593e+06	1.64057e+06	1.28446e+06	1.41702e+06	1.67389e+06	1.78123e+06	T	39	1	0.464177	0.255867	36066.8	LCFLDKVEPQATISEIK|EKLCFLDKVEPQATISEIK|THPQWYPAR|MPIIPFLL|KYDFTSSR|SYLKEFR	MKHYEVEIR	0.19481	0	17.2223	0
O89079	Cope	Mus musculus	Coatomer subunit epsilon	5	5	0.17799	0.870517	525368	615091	675192	661013	667630	811174	638958	T	12	1	0.464478	-0.200056	34545.4	DSIVLELDREMSR|YGVVLDEIKPSSAPELQAVR|NAFYIGSYQQCINEAQR|MFAEYLASENQR|APPVPGAVSGGSGEVDELFDVK		0.27273	0	12.2884	0
Q61510	Trim25	Mus musculus	E3 ubiquitin/ISG15 ligase TRIM25	14	14	0.178711	1.20036	1.55696e+06	1.52264e+06	1716296	1.32341e+06	1.16876e+06	1.74386e+06	1.15995e+06	T	30	1	0.466858	0.263472	71679.9	TPVDDWTPPAR|AVIDAAETSSLRK|SRTELLEYFVK|TPVAPGPPSHFSPNKLPTFGAPGQSLDSK|IDLDHDLIMGIYQGAADLK|LQGESTKPVYIPK|ASAAQPDSVGVK|VYGKFDTIYQVLVK|VLENFLTK|VIFDYNTAHNK|YTTASVSDGLQHYR|ISAWHNNVEK|NKLTIMHSHINGATK|KVYQVRPQLQK		0.30126	0	13.3757	0
P54103	Dnajc2	Mus musculus	DnaJ homolog subfamily C member 2	15	15	0.178729	1.21594	2.66768e+06	1.86844e+06	2536964	1.58733e+06	1.96614e+06	2234142	1.93287e+06	T	46	1	0.466254	0.282066	71677.4	SWNHFSDNEADRVK|AAGEPIKEGDNDYFTCITK|TLVDNAYSCDPR|EHGVASQADSAAPSER|AAQEQVLNASR|EHGVASQADSAAPSERFEGPCIDSTPWTTEEQKLLEQALK|STGGSGSGSKNWSEDDLQLLIK|IAEAVPGR|NQDHYAVLGLGHVR|KAAQEQVLNASR|TYPVNTPERWEK|WFEAFVK|QAELEAVR|KEQEAKEK|EKEEEEVRQQALLAK		0.30757	0	15.1598	0
Q9QYF1	Rdh11	Mus musculus	Retinol dehydrogenase 11	1	1	0.178938	0.802764	113547	101739	132801	117563	188825	126670	151517	T	1	1	0.46592	-0.316952	35125.4	KLDLADTK		0.02532	0.000503778	9.22383	4.14662e-05
Q8QZT1	Acat1	Mus musculus	Acetyl-CoA acetyltransferase, mitochondrial	4	4	0.179048	1.17322	404692	339274	391731	307209	357725	263799	369633	T	20	1	0.466013	0.230479	44787.3	LGTAAIQGAIEK|IHMGNCAENTAK|ASKPTLNEVVIVSAIR|TPIGSFLGSLASQPATK		0.13443	0	13.1174	0
P27601	Gna13	Mus musculus	Guanine nucleotide-binding protein subunit alpha-13	3	2	0.179262	0.778131	127668	230403	140960	217168	218668	209732	182431	T	11	1	0.465883	-0.361916	44026.8	VFLQYLPAIR|IIHGQDFDQR	MVDVGGQR	0.07427	0	9.2985	0
Q9D3D9	Atp5f1d	Mus musculus	ATP synthase subunit delta, mitochondrial	2	2	0.179719	0.81474	368997	430869	360670	387361	594999	407744	534001	T	12	1	0.467137	-0.295588	17589.1	IEANEALVK|AQSELSGAADEAAR		0.1369	0	12.1439	0
Q9EPV8	Ubl5	Mus musculus	Ubiquitin-like protein 5	1	1	0.180046	0.657805	80218.5	153913	132500	192416	269881	175637	112877	T	5	1	0.46725	-0.604268	8541.43	LIAAQTGTR		0.12329	0.000503778	10.1506	5.37324e-05
Q9CQ43	Dut	Mus musculus	Deoxyuridine 5'-triphosphate nucleotidohydrolase	3	3	0.180875	0.757222	682393	765134	598526	1.00957e+06	1.22764e+06	629763	826414	T	18	1	0.469355	-0.401211	17373.7	PCSEDAAAVSASKR|IAQLICER|GNVGVVLFNFGK		0.20988	0	16.4732	0
Q9DCA5	Brix1	Mus musculus	Ribosome biogenesis protein BRX1 homolog	5	5	0.180958	1.26815	552298	642559	614513	455296	348648	639224	500193	T	12	1	0.468928	0.342726	41214.9	TILPHDPTADVFVIPAEEKPVEIQWVKPEPK|FLVQNIHTLAELK|ILIFSSR|HLMQDLR|GGLEVQAK		0.18697	0	17.1582	0
P28656	Nap1l1	Mus musculus	Nucleosome assembly protein 1-like 1	9	8	0.18112	0.892054	2.68652e+06	2611267	2.28273e+06	2.46431e+06	3145762	2.91588e+06	2.81993e+06	T	70	1	0.468689	-0.164797	45316.9	LDGLVDTPTGYIESLPK|NVDLLSDMVQEHDEPILK|FEIINAIYEPTEEECEWKPDEEDEVSEELKEK|KYAVLYQPLFDKR|QLTVQMMQNPQILAALQER|YAVLYQPLFDKR|GIPEFWLTVFK|YAVLYQPLFDK	FYEEVHDLER	0.30691	0	18.3724	0
P61205|P84078	Arf3|Arf1	Mus musculus	ADP-ribosylation factor 3|ADP-ribosylation factor 1	6	0	0.181645	0.64732	628166	1.76689e+06	1086695	1.83848e+06	1.97061e+06	1.66606e+06	1.21143e+06	T	47	2	0.469312	-0.627449	20587.729961796693|20683.668424167277		QDLPNAMNAAEITDKLGLHSLR|HYFQNTQGLIFVVDSNDRER|ILMVGLDAAGK|DAVLLVFANK|VNEAREELMR|MLAEDELR	0.44751|0.44751	0	21.1761	0
Q9D2R0	Aacs	Mus musculus	Acetoacetyl-CoA synthetase	5	5	0.182118	1.25881	385264	622852	552625	412303	328401	434428	457843	T	13	1	0.469992	0.332062	75152.1	TGGIIMLGR|VVLIPYVLPR|GIADVPEWFR|VALYVAR|SDGTLNPNGVR		0.06994	0	12.1363	0
P60229	Eif3e	Mus musculus	Eukaryotic translation initiation factor 3 subunit E	11	10	0.182128	1.12198	2.66126e+06	2.78162e+06	2659715	2101365	2.25423e+06	2.76826e+06	2.55845e+06	T	74	1	0.469409	0.166049	52187.4	LGHVVMGNNAVSPYQQVIEK|QLQAETEPIVK|HLVFPLLEFLSVK|AEYDLTTR|RTTVVAQLK|NLYSDDIPHALR|TTVVAQLK|VLVPATDR|QVLKDLVK|EIYNEKELLQGK	MFEDPETTR	0.24719	0	19.199	0
P70388	Rad50	Mus musculus	DNA repair protein RAD50	15	15	0.182433	1.31154	2455960	1.59913e+06	2.08305e+06	1.35692e+06	1.19463e+06	1.67633e+06	2.05023e+06	T	30	1	0.469444	0.391262	153392	TASQLLSDLTDKEALKQR|VFQGTDEQLNDLYHNHQR|KLDQEMEQLNHHTTTR|HSDELTSLLGYFPNKK|LIQDQQEQIQHLK|LQIATNLQR|SYEDELEPLKNR|LQLQADRHQEHIR|ILELDQELTKAER|RRDEMLGLVPVR|NSSIETLKAEVMSLQNEKADLDR|DVNGEMVAVHR|MSILGVR|TASQLLSDLTDKEALK|TTELVNKDLDIYYK		0.14863	0	16.1404	0
P16858	Gapdh	Mus musculus	Glyceraldehyde-3-phosphate dehydrogenase	39	19	0.182924	1.07613	61458120	64333884	61719900	54409572	54647112	63924888	59825892	T	942	1	0.470105	0.105851	35787.2	DPTNIKWGEAGAEYVVESTGVFTTMEK|VEIVAINDPFIDLNYMVYMFQYDSTHGK|DGRGAAQNIIPASTGAAK|VEIVAINDPFIDLNYMVYMFQYDSTHGKFNGTVK|GILGYTEDQVVSCDFNSNSHSSTFDAGAGIALNDNFVK|GAAQNIIPASTGAAK|LISWYDNEYGYSNR|YDNSLKIVSNASCTTNCLAPLAK|VPTPNVSVVDLTCRLEKPAK|PAKYDDIKK|VVDLMAYMASK|TVDGPSGKLWR|PITIFQERDPTNIK|VPTPNVSVVDLTCRLEK|QASEGPLKGILGYTEDQVVSCDFNSNSHSSTFDAGAGIALNDNFVK|LEKPAKYDDIK|TVDGPSGK|AVGKVIPELNGK|QASEGPLK	VIHDNFGIVEGLMTTVHAITATQK|RVIISAPSADAPMFVMGVNHEKYDNSLK|VIISAPSADAPMFVMGVNHEKYDNSLK|LTGMAFRVPTPNVSVVDLTCR|WGEAGAEYVVESTGVFTTMEK|VPTPNVSVVDLTCR|VIISAPSADAPMFVMGVNHEK|IVSNASCTTNCLAPLAK|VIISAPSADAPMFVMGVNHEKYDNSLKIVSNASCTTNCLAPLAK|RVIISAPSADAPMFVMGVNHEK|VVDLMAYMASKE|LVINGKPITIFQERDPTNIK|AENGKLVINGKPITIFQER|VIPELNGKLTGMAFR|VIPELNGKLTGMAFRVPTPNVSVVDLTCR|LVINGKPITIFQER|VKVGVNGFGR|VGVNGFGR|LTGMAFR|VIPELNGK	0.91592	0	29.3156	0
P02468	Lamc1	Mus musculus	Laminin subunit gamma-1	1	1	0.183276	0.604327	35609.3	35403.2	36688.5	107216	38738	35677.8	84003.4	T	1	1	0.47015	-0.726599	177185	SRVESTEQLIEIASR		0.00933	0.00827586	8.04195	0.000715741
Q587J6	L1td1	Mus musculus	LINE-1 type transposase domain-containing protein 1	34	34	0.183476	1.25456	10344089	7.73071e+06	6497067	5.59997e+06	5.59078e+06	7518614	7.16269e+06	T	166	1	0.469921	0.327183	88134.9	VSEQEDAVEGLTKDTMQLAR|LSALSQVTPLLTNIEK|SSLDDLNSLACTIEAR|LAADFSAATLDVGR|IGMPCLTLYLTSPSESLGAGSDGPK|LTADLSPGTIDAR|HSEVPASMMK|KTATSLCLK|IASDSLSFLFIK|IRLTADLSPGTIDAR|LAFKCDGEANVFSDLHSLR|VSEQEDAVEGLTK|CQEGGAAAASTQR|RIASDSLSFLFIK|ELAFSYLVWDSK|ELEPELQCSVK|CDGEANVFSDLHSLR|ESPPEGGAGATLR|NIYVSDVLNMK|ILQDEGFQPR|EVEVASPEVK|AKPLNSSHVLK|YKVPQTEEPTAK|TATSLCLK|TYKEETLDRK|SQWCGIIK|LAADFSAATLDVGRQWSQVFR|QWSQVFR|ENGA…		0.43223	0	20.2096	0
Q62348	Tsn	Mus musculus	Translin	4	4	0.183714	0.861228	362825	518999	459242	544023	532338	465588	515541	T	12	1	0.470773	-0.215533	26184.8	KVEEVVYDLSIR|GFNKETAAACGEK|LSVNSVTAGDYSRPLHISTFINELDSGFR|LLNLKNDSLR		0.2807	0	12.249	0
Q60710	Samhd1	Mus musculus	Deoxynucleoside triphosphate triphosphohydrolase SAMHD1	2	2	0.183957	2.00733	371138	248224	154167	138430	46136.1	148446	223450	T	3	1	0.470733	1.00528	75844.8	TSSCLQEVSK|SFLYEIVSNKR		0.03191	0	10.1348	0
Q5SWD9	Tsr1	Mus musculus	Pre-rRNA-processing protein TSR1 homolog	7	7	0.184323	1.1612	1.81313e+06	1522525	2113169	1410391	1.76414e+06	1.5531e+06	1.49462e+06	T	42	1	0.471237	0.215622	92046.7	AYLFAHVADFVPSEESDLVGTLK|IFQFQNFVNTR|TSPWDPKENLPR|MSVLNMVVSR|SQDTVLMNLYKR|ISLPEAFK|RGHIKEPLGTHGHMK		0.11333	0	20.2667	0
Q9WV02	Rbmx	Mus musculus	RNA-binding motif protein, X chromosome	14	3	0.18438	1.15467	691098	554540	504851	457003	498530	563731	490157	T	95	1	0.470804	0.207479	42275.4	MVEADRPGK|VEADRPGK|VEADRPGKLFIGGLNTETNEK	LFIGGLNTETNEKALEAVFGK|GFAFVTFESPADAKDAAR|AIKVEQATKPSFESGR|LFIGGLNTETNEK|DRDYSDHPSGGSYR|SAPPTRGPPPSYGGSSR|DYAPPPRDYTYR|DVYLSPR|ALEAVFGK|YDDYSSSR|DYAPPPR	0.31202	0	18.1572	0
Q99PU8	Dhx30	Mus musculus	ATP-dependent RNA helicase DHX30	13	13	0.18493	1.1476	1.25674e+06	1.4104e+06	1.47596e+06	1.10731e+06	1.0372e+06	1.31235e+06	1.37892e+06	T	32	1	0.472156	0.198621	136583	TPLENLVLQAK|ALLSHDSGSDHLAFVR|LSQSLLELWR|IPQLLLER|YLILPVHSNIPMMDQK|SGNILLHK|KIEAFLSHYPVDSSWISPELR|TAVEFLSK|NLLNSVIGR|GWGLLGPR|CQSGFAYHLFPR|LQSDDILPLGK|MVPFQVPEILR		0.12243	0	15.1475	0
P11531	Dmd	Mus musculus	Dystrophin	1	1	0.185168	1.354	178974	84289.3	140560	82282.8	91525.6	105537	101976	T	3	1	0.471875	0.437229	425566	MQILEDHNKQLESQLHR		0.00462	0.00791066	8.12073	0.000700327
P43277	H1-3	Mus musculus	Histone H1.3	16	3	0.185328	1.28336	1.58346e+06	949736	1.33445e+06	1.18791e+06	785282	1.04631e+06	956071	T	187	1	0.47161	0.359926	22086.1	SETAPAAPAAPAPVEKTPVK|SETAPAAPAAPAPVEK|SETAPAAPAAPAPVEKTPVKK	KALAAAGYDVEKNNSR|ALAAAGYDVEKNNSR|KASGPPVSELITK|ASGPPVSELITK|SGVSLAALKK|ALAAAGYDVEK|GTGASGSFKLNKK|KALAAAGYDVEK|GTGASGSFKLNK|ERSGVSLAALKK|RKASGPPVSELITK|SGVSLAALK|GTGASGSFK	0.33937	0	23.3405	0
P01831	Thy1	Mus musculus	Thy-1 membrane glycoprotein	2	2	0.185412	2.76249	381838	286053	228824	107418	167245	23114	302176	T	2	1	0.471257	1.46597	18068.5	HVLSGTLGIPEHTYR|VTLSNQPYIK		0.15432	0	11.1671	0
Q6P2K6	Ppp4r3a	Mus musculus	Serine/threonine-protein phosphatase 4 regulatory subunit 3A	2	2	0.185436	1.28186	135756	156306	206312	99068.2	120356	135827	163780	T	4	1	0.470646	0.358241	93783.1	LSLSSGTK|SFLFEPVVK		0.02073	0.00827586	8.18915	0.000715741
O88844	Idh1	Mus musculus	Isocitrate dehydrogenase [NADP] cytoplasmic	25	24	0.186417	1.09677	4280490	5183771	4.68501e+06	4.7084e+06	4.07226e+06	4.12876e+06	4267144	T	142	1	0.472865	0.133266	46644.5	TVEAEAAHGTVTR|ATDFVVPGPGKVEITYTPK|LIDDMVAQAMK|FKDIFQEIYDKK|SEGGFIWACK|SDYLNTFEFMDKLGENLK|ATDFVVPGPGK|SIEDFAHSSFQMALSK|SDYLNTFEFMDKLGENLKAK|LVTGWVKPIIIGR|AKLDNNTELSFFAK|IIWELIKEK|DATNDQVTKDAAEAIKK|SDYLNTFEFMDK|HAYGDQYR|ALEDVCIETIEAGFMTK|GWPLYLSTK|VEITYTPK|IIWELIK|EKLILPYVELDLHSYDLGIENR|DLAACIK|LILPYVELDLHSYDLGIENRDATNDQVTK|CATITPDEK|YKSQFEAQK	NILGGTVFR	0.58454	0	16.3992	0
Q8CDN6	Txnl1	Mus musculus	Thioredoxin-like protein 1	5	5	0.186485	0.795666	581848	797168	790447	789056	1.21852e+06	795509	855989	T	17	1	0.472424	-0.329766	32216.7	ISYFTFIGTPVQATNMNDFKR|FQGPDNGQGPK|VGVKPVGSDPDFQPELSGAGSR|IFINLPR|GCGPCLR		0.23529	0	12.1331	0
Q9CQE8	RTRAF	Mus musculus	RNA transcription, translation and transport factor protein	8	8	0.186492	1.11749	1.27452e+06	1.35745e+06	1.56403e+06	1.30814e+06	1.24859e+06	1343603	1.10182e+06	T	50	1	0.471814	0.160258	28134.8	INEAIVAVQAIIADPK|LLHIEELRELQTK|NAEPLINLDVNNPDFK|HDDYLVMLK|LTALDYHNPSGFNCKDETEFR|NFIVWLEDQK|YLKDVNCPFK|EGLPVALEK		0.42623	0	15.4338	0
Q922D8	Mthfd1	Mus musculus	C-1-tetrahydrofolate synthase, cytoplasmic	46	45	0.186876	1.07021	13927693	13277159	13129624	12193347	11697495	13806382	12632019	T	310	1	0.472521	0.0978975	101136	CTHWAEGGQGALALAQAVQR|KVVGDVAYDEAKER|GCLELIKEAGVQIAGR|TDPTTLTDDEINR|IYGADDIELLPEAQNKAEIYTK|TANLDKEVNKGDILVVATGQPEMVK|YVVVTGITPTPLGEGK|ASQAPSSFQLLYDLK|SKIVGAPMHDLLLWNNATVTTCHSK|IVGAPMHDLLLWNNATVTTCHSK|TDTDAELDLVSR|THLSLSHNPEQK|QGFGNLPICMAK|LGIEKTDPTTLTDDEINR|AYTEEDLDLVEKGFSNLR|AYTEEDLDLVEKGFSNLRK|KGEPISCEDLGVSGALTVLMK|LKAAEEIGIK|KITIGQSPTEKGHTR|IFHELTQTDK|DAIKPNLMQTLEGTPVFVHAGPFANIAHGNSSIIADR|LDIDP…	VLDTNDRFLR	0.55936	0	19.3515	0
Q8BHD7	Ptbp3	Mus musculus	Polypyrimidine tract-binding protein 3	4	1	0.186931	1.40441	157098	108563	141269	70715.8	71267.9	128645	128061	T	18	1	0.47217	0.489968	56665.3	SQPVYIQYSNHR	IDFSKLTSLNVK|EGQEDQGLTK|LTSLNVK	0.06501	0	10.0942	0
Q08122	Tle3	Mus musculus	Transducin-like enhancer protein 3	3	1	0.187273	1.44907	312351	147165	271145	121736	140690	212501	180082	T	13	1	0.472252	0.535123	83394.1	NDAPTPGTSTTPGLR	TPYGASIFQSK|LWTGGLDNTVR	0.04793	0	13.4522	0
Q91YJ2	Snx4	Mus musculus	Sorting nexin-4	1	1	0.187698	1.51333	115398	74108.3	42918.4	37463.6	49115.4	43489.7	62612.1	T	1	1	0.472735	0.597731	51745.1	VGLENFLLR		0.02	0.00289436	8.12177	0.000294499
Q9DCG9	Trmt112	Mus musculus	Multifunctional methyltransferase subunit TRM112-like protein	3	3	0.187961	0.84071	971066	941955	887545	945985	1.34227e+06	1.26893e+06	940906	T	21	1	0.472513	-0.25032	14132.3	INPVEFNPEFVAR|LLTHNLLSSHVR|LQATEVR		0.256	0	13.3604	0
Q501J6	Ddx17	Mus musculus	Probable ATP-dependent RNA helicase DDX17	31	20	0.188053	1.1652	4821357	3825422	4.10516e+06	3.3335e+06	3.14376e+06	4.25383e+06	3.89793e+06	T	194	1	0.472067	0.220582	72354	SSQSSSQQFSGIGR|ELAQQVQQVADDYGK|DMVGIAQTGSGK|LIQLMEEIMAEKENK|SGKAPILIATDVASR|VLEEANQAINPK|SQPERDWVLNEFR|NFYVEHPEVAR|GLDVEDVKFVINYDYPNSSEDYVHR|FVINYDYPNSSEDYVHR|STNKGTAYTFFTPGNLK|LIDFLESGK|TIIFVETK|GTAYTFFTPGNLK|LTPYEVDELRR|TLAYLLPAIVHINHQPYLER|TTSSANNPNLMYQDECDRR|LIDFLESGKTNLRR|WDLSELPKFEK|FGNPGER	GDGPICLVLAPTR|APILIATDVASR|GVEICIATPGR|QTLMWSATWPK|MLDMGFEPQIR|LKSTCIYGGAPK|STCIYGGAPK|GLDVEDVK|IVDQIRPDR|KIVDQIRPDR|QTLMWSATWPKEVR	0.47692	0	19.3969	0
Q6ZQ38	Cand1	Mus musculus	Cullin-associated NEDD8-dissociated protein 1	34	34	0.188988	1.19474	5.95597e+06	8097040	6.062e+06	6.15144e+06	4575300	6.13563e+06	5.51454e+06	T	154	1	0.474504	0.256698	136245	ASASYHISNLLEK|LLEDKNGEVQNLAVK|VKEYQVETIVDTLCTNMLSDKEQLR|EGPAVVGQFIQDVK|FMATNDLMTELQKDSIKLDDDSER|SVILEAFSSPSEEVK|HEMLPEFYK|LLALLSLGEVGHHIDLSGQLELK|LKAADIDQEVKER|ALTLIAGSPLK|LKGYLISGSSYAR|TYIQCIAAISR|VALVTFNSAAHNKPSLIR|VIRPLDQPSSFDATPYIK|LTLIDPETLLPR|CLDAVVSTR|TLEDPDLNVR|ITSEALLVTQQLVK|TVSPALIAR|ADVFHAYLSLLK|CLGPLVSK|DLLDSVLPHLYNETK|FTISDHPQPIDPLLK|AADIDQEVKER|IDLRPVLGEGVPILASFLR|NVVAECLGK|NCIGDFLK…		0.32927	0	22.233	0
P35979	Rpl12	Mus musculus	Large ribosomal subunit protein uL11	10	10	0.189	0.773316	18425452	18007502	13240436	25443602	26350224	18885434	15889599	T	156	1	0.474	-0.370869	17793.5	HSGNITFDEIVNIAR|CTGGEVGATSALAPK|QAQIEVVPSASALIIK|EILGTAQSVGCNVDGR|ELSGTIKEILGTAQSVGCNVDGR|ELSGTIKEILGTAQSVGCNVDGRHPHDIIDDINSGAVECPAS|IGPLGLSPK|EILGTAQSVGCNVDGRHPHDIIDDINSGAVECPAS|HPHDIIDDINSGAVECPAS|KVGDDIAK		0.63636	0	24.3664	0
Q9D0M5	Dynll2	Mus musculus	Dynein light chain 2, cytoplasmic	3	1	0.1899	1.67498	110672	190431	165516	139925	114619	99123.5	42279.1	T	24	1	0.476388	0.744142	10343.1	YNIEKDIAAYIKK	YNPTWHCIVGR|KYNPTWHCIVGR	0.2809	0	11.2703	0
Q9WVA4	Tagln2	Mus musculus	Transgelin-2	12	9	0.190017	0.851102	3.39178e+06	4.11511e+06	3.82581e+06	4.02232e+06	5623008	4027992	4206449	T	80	1	0.476041	-0.232596	22381.2	ANRGPSYGLSR|NVIGLQMGTNR|QMEQISQFLQAAER|NFSDNQLQEGK|LINSLYPEGQAPVKK|IQASSMAFK|DDGLFSGDPNWFPK|NMACVQR|TLMNLGGLAVARDDGLFSGDPNWFPKK	TLMNLGGLAVAR|GASQAGMTGYGMPR|GPSYGLSR	0.59799	0	16.1564	0
Q921F2	Tardbp	Mus musculus	TAR DNA-binding protein 43	10	10	0.190521	1.14076	3.13559e+06	3.30991e+06	3.04633e+06	2.49851e+06	2.4043e+06	3.12562e+06	3.14416e+06	T	98	1	0.476744	0.189991	44519.3	FGGNPGGFGNQGGFGNSR|KMDETDASSAVK|LVEGILHAPDAGWGNLVYVVNYPK|LVEGILHAPDAGWGNLVYVVNYPKDNKR|RKMDETDASSAVK|GISVHISNAEPK|LVEGILHAPDAGWGNLVYVVNYPKDNK|FTEYETQVK|YRNPVSQCMR|QSPDEPLR		0.2343	0	19.3627	0
Q9Z108	Stau1	Mus musculus	Double-stranded RNA-binding protein Staufen homolog 1	3	3	0.191292	1.3011	581401	300399	525057	348707	369379	327372	342203	T	6	1	0.477939	0.379736	53890.8	TRPSEQLYYLSR|VSVGEFVGEGEGK|EAEEENLNKSEISQVFEIALKR		0.09651	0	11.1049	0
Q9CPU0	Glo1	Mus musculus	Lactoylglutathione lyase	2	2	0.191731	0.772209	124921	211297	204484	219292	209535	201368	287767	T	3	1	0.478618	-0.372937	20796.4	VLGLTLLQK|TAWTFSR		0.08696	0.00656353	8.05713	0.000619272
Q8R570	Snap47	Mus musculus	Synaptosomal-associated protein 47	1	1	0.192016	1.20889	68771.6	89455.4	70161.1	58800.2	50144.1	70566.8	73407.6	T	3	1	0.478731	0.273679	46495.1	IELLEDALVLR		0.02663	0	11.3625	0
Q9CS00	Cactin	Mus musculus	Splicing factor Cactin	1	1	0.192254	0.533724	59545.1	63861.7	137406	202312	284177	124079	72702.5	T	3	1	0.47894	-0.905834	90606.2	LLTAHELPLDAHVLEPHEDLQR		0.0285	0	12.0821	0
P97329	Kif20a	Mus musculus	Kinesin-like protein KIF20A	1	1	0.192576	1.37291	96842.5	54086.6	97403.1	65467.6	52266.6	45053.7	74431.1	T	2	1	0.479073	0.457237	99814.4	VFQGFFTGR		0.01015	0.00567644	8.13475	0.000536279
Q01320	Top2a	Mus musculus	DNA topoisomerase 2-alpha	4	4	0.192832	1.34338	336091	497651	467225	411789	233886	267656	397950	T	9	1	0.47908	0.425865	172682	IKSENVEGTPAEDGAEPGSLR|YIFTMLSPLAR|TLAVSGLGVVGR|SYVDLYLKDKVDETGNSLK		0.04123	0	14.2467	0
P57780	Actn4	Mus musculus	Alpha-actinin-4	17	6	0.1929	0.84188	1.20151e+06	852508	1186068	1.17334e+06	1.25638e+06	1.17826e+06	1485693	T	69	1	0.478747	-0.248314	104911	KHEAFESDLAAHQDRVEQIAAIAQELNELDYYDSHNVNTR|VLAGDKNFITAEELRR|GISQEQMQEFR|VQQLVPK|EAILAIHK|ASIHEAWTDGKEAMLK	TINEVENQILTR|AIMTYVSSFYHAFSGAQK|LASDLLEWIR|KTFTAWCNSHLR|HTNYTMEHIR|LSNRPAFMPSEGR|ALDFIASK|CQLEINFNTLQTK|VGWEQLLTTIAR|KHEAFESDLAAHQDR|LASDLLEWIRR	0.22697	0	14.2703	0
Q8R323	Rfc3	Mus musculus	Replication factor C subunit 3	3	3	0.193393	1.20999	371058	369997	351662	326525	219191	329695	347571	T	7	1	0.47942	0.274994	40499.9	EGLALPSTLAR|VVLLTEVDKLTK|LDYHKEQAAQLR		0.09831	0	11.2493	0
P07742	Rrm1	Mus musculus	Ribonucleoside-diphosphate reductase large subunit	6	6	0.193571	0.729347	234700	502465	339457	447888	601758	404938	443425	T	14	1	0.479476	-0.455322	90152.5	VLSGEFQIVNPHLLK|SNQQNLGTIK|KVFSDVMEDLYNYINPHNGR|IIDINYYPIPEAHLSNKR|RVLSGEFQIVNPHLLK|IAVSNLHKETK		0.0947	0	11.155	0
Q8VCD5	Med17	Mus musculus	Mediator of RNA polymerase II transcription subunit 17	4	4	0.193613	2.45367	522481	471339	364029	69058	527945	88495	343084	T	5	1	0.478948	1.29494	72416.4	TAATIDSLASR|LSGPQAFDKNEINSIQSTEGLLEK|SLAGAAQILLK|EIFAQLSR		0.0832	0.000503778	9.21036	4.14662e-05
Q922U2	Krt5	Mus musculus	Keratin, type II cytoskeletal 5	23	1	0.193891	0.571077	31453.3	28139.6	74961.7	118892	72089.3	39262.3	75044.9	T	271	1	0.478834	-0.808244	61728.6	ISLGGACGAGGYGSRSLYNVGGSK	SRTEAESWYQTKYEELQQTAGR|SLDLDSIIAEVK|LALDVEIATYR|VDALMDEINFMK|TLNNKFASFIDKVR|NKYEDEINKR|FASFIDKVR|LALDVEIATYRK|KLLEGEECR|LRSEIDNVKK|YEELQQTAGR|LLREYQELMNTK|SRTEAESWYQTK|TTAENEFVMLKK|TEAESWYQTK|LLEGEECR|GRLDSELR|LRSEIDNVK|FLEQQNK|NTKHEISEMNR|FASFIDK|EYQELMNTK	0.3	0	17.3445	0
P35279	Rab6a	Mus musculus	Ras-related protein Rab-6A	2	1	0.193922	0.822245	225689	218337	181192	239058	329946	205070	250526	T	3	1	0.478289	-0.28236	23574.9	ELNVMFIETSAK	SLIPSYIR	0.09615	0	10.1097	0
Q3TKT4	Smarca4	Mus musculus	Transcription activator BRG1	21	11	0.194212	1.1247	3.80552e+06	2.97176e+06	3.47758e+06	2.97049e+06	2.70965e+06	3.29217e+06	3.15432e+06	T	77	1	0.47819	0.169536	181313	LAYLLQQTDEYVANLTELVR|KKIPDPDSDDVSEVDAR|GPTPFNQNQLHQLR|GQPLPDHLQMAVQGK|GLDPVEILQER|ILTGTDAPK|ELPEYYELIR|GVLLTDGSEKDKK|IVDAVIK|DSEAGSSTPTTSTR|AQIMAYK	TLMNTIMQLR|LCTVNSVEEK|RLMAEDEEGYRK|VIQAGMFDQK|LTQVLNTHYVAPR|QLSEVFIQLPSRK|LMAEDEEGYRK|QKHQEYLNSILQHAK|ASGKFELLDR|KPVDFKK	0.14693	0	15.1133	0
Q9D1L0	Chchd2	Mus musculus	Coiled-coil-helix-coiled-coil-helix domain-containing protein 2	1	1	0.194224	0.809309	153969	198015	186445	214535	229632	169156	283770	T	8	1	0.477612	-0.305237	15650.8	RAPAAQPPAAAAPSAVGSPAAAPR		0.15686	0	15.3359	0
P70349	Hint1	Mus musculus	Adenosine 5'-monophosphoramidase HINT1	5	4	0.195413	0.870091	1674327	1.37264e+06	1.17404e+06	1544020	1.68293e+06	1.49607e+06	1.68594e+06	T	45	1	0.479555	-0.200763	13768.1	KHISQISVADDDDESLLGHLMIVGKK|KHISQISVADDDDESLLGHLMIVGK|AQVAQPGGDTIFGK|IIFEDDRCLAFHDISPQAPTHFLVIPK	MVVNEGADGGQSVYHIHLHVLGGR	0.72222	0	22.1639	0
P23475	Xrcc6	Mus musculus	X-ray repair cross-complementing protein 6	1	1	0.196164	0.891415	83079.3	64643.9	72038	84719	83551.9	72654.6	86814.1	T	1	1	0.480954	-0.165831	69440.9	KQELLDALIR		0.01645	0.00827586	8.05775	0.000715741
P60766	Cdc42	Mus musculus	Cell division control protein 42 homolog	4	4	0.196227	0.839582	644142	589406	409755	635315	647565	616107	664324	T	16	1	0.480519	-0.252258	21245	YVECSALTQK|TPFLLVGTQIDLRDDPSTIEK|WVPEITHHCPK|QKPITPETAEK		0.27749	0	11.1816	0
Q6PHZ2	Camk2d	Mus musculus	Calcium/calmodulin-dependent protein kinase type II subunit delta	4	2	0.196265	1.46821	163621	82537.8	124421	59150.6	86469.1	125579	66931	T	14	1	0.480035	0.554059	56333.6	IPTGQEYAAK|LTQYMDGSGMPK	DLKPENLLLASK|STVASMMHR	0.08617	0	10.2276	0
P62900	Rpl31	Mus musculus	Large ribosomal subunit protein eL31	10	8	0.196557	1.23985	8524872	5843986	7.79384e+06	5.16233e+06	4.92204e+06	7.1784e+06	6572098	T	93	1	0.480746	0.310165	14453.9	NEDEDSPNKLYTLVTYVPVTTFK|LYTLVTYVPVTTFK|NLQTVNVDEN|IHGVGFK|RNEDEDSPNKLYTLVTYVPVTTFK|EYTINIHKR|SAINEVVTR|EYTINIHK	EMGTPDVR|FAMKEMGTPDVR	0.568	0	18.3643	0
O70551	Srpk1	Mus musculus	SRSF protein kinase 1	11	9	0.196987	1.22251	1.24633e+06	922249	1.3592e+06	1.02118e+06	773763	1.11361e+06	922346	T	29	1	0.481188	0.289851	73042.8	LAAEATEWQR|RLAAEATEWQR|IIHTDIKPENILLSVNEQYIR|SGAPPPSGSAVSTAPQPKPADK|GKFSAGNFLINPLEPK|ATAAECLR|VLALQAR|KVLALQAR|FSAGNFLINPLEPK	HFTEDIQTR|IGDLFNGR	0.15895	0	12.2573	0
P33610	Prim2	Mus musculus	DNA primase large subunit	2	2	0.197524	1.27578	88928.9	73867.8	87184.6	96311.5	58648.3	53928.5	58937.4	T	2	1	0.482104	0.351384	58371.7	ISLDQIDSLSTK|HSDAELLK		0.0396	0	14.1047	0
Q7TQK5	Ccdc93	Mus musculus	Coiled-coil domain-containing protein 93	1	1	0.197552	1.14922	51454.5	66813	46608.3	45361.1	49885.5	45810.5	48130.9	T	1	1	0.481591	0.200657	72557.7	TVVGLSDAYKPR		0.01908	0.00567644	8.07018	0.000536279
Q9D0E1	Hnrnpm	Mus musculus	Heterogeneous nuclear ribonucleoprotein M	52	40	0.197662	1.22103	27741932	18220636	26487594	17690778	17715190	23185118	19683898	T	504	1	0.481282	0.288103	77597.4	GIGIVTFEQSIEAVQAISMFNGQLLFDRPMHVK|GIGMGNLGPAGMGMEGIGFGINK|AAGVEAAAEVAATEPK|QGGGGAGGSVPGIER|EKVGEVTYVELLMDAEGK|IGGMEGPFGGGMENMGR|VGEVTYVELLMDAEGK|GGNRFEPYSNPTKR|GCGVVKFESPEVAER|GNFGGSFAGSFGGAGGHAPGVAR|AFITNIPFDVKWQSLKDLVK|AFITNIPFDVK|INEILSNALK|MAAPIDRVGQTIER|KACQIFVR|LKEVFSMAGVVVR|INEILSNALKR|ADILEDKDGK|YRAFITNIPFDVK|FGSGMNMGR|FESPEVAER|NLPFDFTWK|GDFFPPERPQQLPHGLGGIGMGLGPGGQPIDANHLSK|DKFNECGHVLYA…	MGPAMGPALGAGIER|MGPLGLDHMASSIER|MGLAMGGAGGASFDR|MGAGLGHGMDR|MGAGMGFGLER|MVPTGMGASLER|MGANSLER|MGANNLER|MGPVMDR|MGLVMDR|MAAPIDR|MGLSMDR	0.75034	0	27.247	0
P97801	Smn1	Mus musculus	Survival motor neuron protein	4	4	0.198317	1.20808	481976	312307	306330	278178	291904	306255	312155	T	8	1	0.482017	0.272711	31234.2	NGDICETPDKPK|HALKNGDICETPDKPK|NATTPLKQWK|AAPWTSFLPPPPPMPGSGLGPGKPGLK		0.18403	0	10.087	0
Q9QWT9	Kifc1	Mus musculus	Kinesin-like protein KIFC1	12	12	0.198584	1.14989	2.34739e+06	1.63929e+06	1.9116e+06	1.769e+06	1.55129e+06	1.76461e+06	1.68975e+06	T	36	1	0.481738	0.201495	74107.3	ASPGSEELTVTNAR|NTLEGELASVR|VNQCVIGTAQANKK|SHSVFQLQISGEHAAR|GQLCDLNEELKR|STLTGAPAPTVR|STLSTQLEEQERR|SQKPVPAAPAQKPGTSTAPVVVGK|YVPVSCEKEVEALLHLAHQNR|SRAEQDQQRLETLSAR|LLQELQGER|TQTLELENR		0.25371	0	13.2733	0
Q99KI0	Aco2	Mus musculus	Aconitate hydratase, mitochondrial	21	21	0.199899	1.07854	5.69417e+06	4.79572e+06	5.08538e+06	4.69598e+06	4810495	5.13591e+06	4580650	T	106	1	0.484824	0.109084	85410	GHLDNISNNLLIGAINIENGK|IVYGHLDDPANQEIER|DVGGIVLANACGPCIGQWDRK|SQFTITPGSEQIR|NAVTQEFGPVPDTAR|FRGHLDNISNNLLIGAINIENGK|AKDINQEVYNFLATAGAK|LNRPLTLSEK|CTTDHISAAGPWLK|VAVPSTIHCDHLIEAQVGGEK|VDVSPTSQR|VAVPSTIHCDHLIEAQVGGEKDLRR|FNPETDFLTGK|VAMSHFEPSEYIR|FKLEAPDADELPR|NTIVTSYNR|DGYAQILR|VAVPSTIHCDHLIEAQVGGEKDLR|ATIERDGYAQILR|FNPETDFLTGKDGK|TDIANLAEEFK		0.30385	0	20.2089	0
O55135	Eif6	Mus musculus	Eukaryotic translation initiation factor 6	3	3	0.199907	1.20448	768747	730530	978728	574118	802723	601396	771835	T	16	1	0.484227	0.268405	26494.2	HGLLVPNNTTDQELQHIR|LNEAKPSTIATSMR|NSLPDSVQIR		0.17143	0	16.3587	0
P40336	Vps26a	Mus musculus	Vacuolar protein sorting-associated protein 26A	2	2	0.200069	0.74745	234845	438037	397473	525084	351453	463927	527138	T	4	1	0.483941	-0.419951	38089.7	LFLAGYDPTPTMR|ELALPGELTQSR		0.07645	0	9.32429	0
Q8BJY1	Psmd5	Mus musculus	26S proteasome non-ATPase regulatory subunit 5	8	8	0.200073	0.914399	1.42887e+06	1.66409e+06	1.72564e+06	1.63325e+06	1.85965e+06	1827893	1.69246e+06	T	31	1	0.483346	-0.129105	55936.9	TVAEIFGNSNYLR|ALQSVVQAVPLHELR|VFTAIADQPWAQR|IVENSEAVTEILNNAELLK|LEAPLEELR|LLQAVEPIHLAR|AAQAVSLLR|TLTLSQIGR		0.19643	0	15.2625	0
A2AGT5	Ckap5	Mus musculus	Cytoskeleton-associated protein 5	21	21	0.200752	1.07303	2.16304e+06	2373099	1.96046e+06	2.03974e+06	1.94867e+06	2.0326e+06	2.02845e+06	T	45	1	0.484216	0.101695	225492	TQPIPAPVEDSVSSTIEAKPDLKK|NAALNTIVTVYNVHGDQVFK|TSAQIVLDGLVDKIGDVK|TTGEVVSGVVSK|DAAFEALGTALK|SVNPFLADVDKLKLDR|LIGNLSEKDMSMLEER|EQHQHSDLDSNQTHSAGTMTSSSSTTNIDDLKK|AKVNDFLAEIFKK|VNDFLAEIFKK|LACMEEFQK|CEMPELVQHKLDDIFEPVLIPEPK|LFAIEIYR|SLLKPFCAALLK|ANMPSKPAAPAK|IEISDKITSELVSK|FIQPNIGELPTALK|QQTSLFIAR|SLSGHPEAAQMVR|YSDTDIEPFLK|MIFEDEKPALLSQIDAEFQK		0.15256	0	18.1469	0
Q9DBJ1	Pgam1	Mus musculus	Phosphoglycerate mutase 1	11	7	0.201307	0.702224	2.09369e+06	2.78245e+06	3.45269e+06	2.53678e+06	5098148	3.3213e+06	5237109	T	77	1	0.485534	-0.509998	28813.9	FSGWYDADLSPAGHEEAK|FSGWYDADLSPAGHEEAKR|ALPFWNEEIVPQIK|YADLTEDQLPSCESLKDTIAR|RVLIAAHGNSLR|HGESAWNLENR|SYDVPPPPMEPDHPFYSNISK	HYGGLTGLNKAETAAK|VLIAAHGNSLR|AMEAVAAQGK|HYGGLTGLNK	0.48819	0	16.109	0
Q08288	Lyar	Mus musculus	Cell growth-regulating nucleolar protein	21	21	0.202091	1.24092	5862380	4420491	4.93026e+06	4316320	3.08784e+06	5.23262e+06	3891218	T	115	1	0.487628	0.311413	43708.5	NQEAGHEAAGEEAAEASGPPEK|KAQGGQASEEGADRNGGPGEDAAEGQTK|VRELLQQISAFDNVPR|ELLQQISAFDNVPR|LPEQPEEGEAKDHEAPSK|VHSDSVLEQVWDIFSEASSSEQDQQQPPSHTAKPHAEMPITK|AQGGQASEEGADRNGGPGEDAAEGQTK|VIAQYHAVMNDHHTSEEELLAIFNRK|MKLPEQPEEGEAKDHEAPSK|LPEQPEEGEAKDHEAPSKGK|VIAQYHAVMNDHHTSEEELLAIFNR|NQEAGHEAAGEEAAEASGPPEKK|VFFTCNACGESVKK|KKNQEAGHEAAGEEAAEASGPPEK|QAPDNEISVK|INELIKKPNVSPK|QQAWIQK|QAPDNEISVKK|ELKLENHQENLR|NQEAGHEA…		0.57732	0	22.3596	0
Q8CGC4	Lsm14b	Mus musculus	Protein LSM14 homolog B	2	2	0.20249	0.828439	218860	177156	254450	291552	233546	300954	219214	T	12	1	0.488068	-0.271533	42284.3	KLNTETFGVSGR|SFFDNISSELK		0.05974	0	11.2232	0
Q8K2K6	Agfg1	Mus musculus	Arf-GAP domain and FG repeat-containing protein 1	1	1	0.203036	0.780022	75887.7	87845.8	90368.6	84240.7	159924	105870	96362.9	T	7	1	0.489074	-0.358414	58007	SLLGESAPALHLNK		0.02496	0.000503778	9.09765	4.14662e-05
Q9D8N0	Eef1g	Mus musculus	Elongation factor 1-gamma	23	23	0.204062	0.882475	5.29477e+06	7.19175e+06	6.55337e+06	6651353	7668708	7.42683e+06	6.83832e+06	T	144	1	0.490868	-0.180373	50029.2	KAAAPAPEEEMDECEQALAAEPK|ALIAAQYSGAQVR|AAGTLYTYPENWR|KLDPGSEETQTLVR|AKDPFAHLPK|GSTPEAAAQVVQWVSFADSDIVPPASTWVFPTLGIMHHNK|ILGLLDTHLK|STFVLDEFKR|LDPGSEETQTLVR|VLSAPPHFHFGQTNR|EYFSWEGTFQHVGK|QAFPNTNR|WFLTCINQPQFR|DPFAHLPK|QVLEPSFR|AILGEVKLCEK|STFVLDEFKRK|STFVLDEFK|KFAESQPK|TFLVGER|MAQFDAK|FAESQPK|QATENAKEEVKR		0.54005	0	20.5056	0
Q8BPB0|Q921Y0	Mob1b|Mob1a	Mus musculus	MOB kinase activator 1B|MOB kinase activator 1A	2	0	0.204097	0.8118	150530	201484	221691	242901	253870	264240	179326	T	2	2	0.490441	-0.300804	25074.63824943225|25063.60834628439		HAEATLGSGNLR|ELAPLQELIEK	0.10648|0.10648	0.0061263	8.08388	0.00058696
Q05816	Fabp5	Mus musculus	Fatty acid-binding protein 5	1	1	0.20441	0.464337	46083.7	56411.6	37031.2	151675	27431	121393	187915	T	3	1	0.490628	-1.10675	15127.4	ASLKDLEGK		0.06667	0.000997009	9.08058	6.65894e-05
Q99N84	Mrps18b	Mus musculus	Small ribosomal subunit protein mS40	2	2	0.204455	2.02691	251078	178919	207466	36016.6	85385.1	206496	182985	T	4	1	0.490085	1.01928	28684.4	VAGNPCPICR|YLDSEEYHNR		0.07874	0.000503778	9.21747	4.14662e-05
Q64310	Surf4	Mus musculus	Surfeit locus protein 4	1	1	0.204489	2.4661	137586	311095	252144	34668.6	49759.1	117665	317682	T	3	1	0.489515	1.30223	30360.8	SMFAGVPTMR		0.03717	0.00243072	8.23112	0.000150797
O54781	Srpk2	Mus musculus	SRSF protein kinase 2	4	2	0.204489	1.37703	204061	117058	147841	82439.7	89947.8	147163	137057	T	8	1	0.488921	0.461564	76708.7	LQEIEELER|HFALSGK	HFTEDIQTR|IGDLFNGR	0.04846	0.000503778	10.1836	5.37324e-05
Q91WJ8	Fubp1	Mus musculus	Far upstream element-binding protein 1	5	5	0.204672	0.8103	479304	326041	507022	476138	645450	541156	474658	T	6	1	0.488596	-0.303472	68497	MVMIQDGPQNTGADKPLR|IAQITGPPDR|EMVLELIR|CQHAAEIITDLLR|GTPQQIDYAR		0.09063	0.00827586	9.10131	0.000715741
Q91W50	Csde1	Mus musculus	Cold shock domain-containing protein E1	23	23	0.204748	1.0882	4.70724e+06	3.96524e+06	4207706	3.87208e+06	3.61214e+06	4.22724e+06	4.05666e+06	T	89	1	0.488247	0.121948	88734.8	AHSVNGITEEANPTIYSGK|GPDNSMGFGAER|NITLDDASAPR|LKNITLDDASAPR|SKVTLLEGDHVR|FLGTVEKEATFSNPK|ATVECVKDQFGFINYEVGDSKK|LLTSYGFIQCSER|NQNDPLPGR|CSACNVWR|EMGVIAAMR|LLGYVATLK|IKPEIHPEER|LLPQGTVIFEDISIEHFEGTVTK|CQGVVCAMK|LFFHCSQYNGNLQDLK|VTLLEGDHVR|GPDNSMGFGAERK|VPSKNQNDPLPGR|LTIAFQAK|ELPFGDKDTK|FLGTVEK|FQLCVLGQNAQTMAYNITPLRR		0.30576	0	19.3048	0
Q9D6L8	Ppil3	Mus musculus	Peptidyl-prolyl cis-trans isomerase-like 3	1	1	0.204754	0.650577	170177	203358	131288	446957	311150	175977	171646	T	4	1	0.487657	-0.620209	18115.9	VIDGLETLDELEKLPVNEK		0.11801	0	12.1733	0
P56379	Atp5mpl	Mus musculus	ATP synthase subunit ATP5MPL, mitochondrial	1	0	0.204835	1.47954	277282	429911	369499	181546	158884	287356	391640	T	5	1	0.487392	0.565152	6693.58		MFQTLIQK	0.13793	0	10.1178	0
P47962	Rpl5	Mus musculus	Large ribosomal subunit protein uL18	22	21	0.204968	1.13098	5831013	5.40222e+06	6.55993e+06	4.46339e+06	5.11219e+06	5646235	5.7957e+06	T	196	1	0.486998	0.177571	34378.7	VGLTNYAAAYCTGLLLAR|RFPGYDSESKEFNAEVHR|TTTGNKVFGALK|TTTGNKVFGALKGAVDGGLSIPHSTK|GAVDGGLSIPHSTK|YLMEEDEDAYKKQFSQYIK|IEGDMIVCAAYAHELPK|DIICQIAYAR|NNVTPDMMEEMYKK|KHIMGQNVADYMR|FPGYDSESKEFNAEVHRK|LVIQDKNKYNTPK|GAVDGGLSIPHSTKR|YLMEEDEDAYKK|RFPGYDSESK|AHAAIRENPVYEK|VTNRDIICQIAYAR|QFSQYIK|KAHAAIRENPVYEK|RLVIQDK|ENPVYEK	HIMGQNVADYMR	0.55892	0	18.364	0
O35226	Psmd4	Mus musculus	26S proteasome non-ATPase regulatory subunit 4	9	9	0.204998	0.800351	1.79827e+06	1.4297e+06	1.40064e+06	2.16718e+06	2.49742e+06	1.59849e+06	1.55482e+06	T	67	1	0.486527	-0.321295	40678.2	IIAFVGSPVEDNEKDLVK|LQAQQDAVNIVCHSK|SNPENNVGLITLANDCEVLTTLTPDTGR|SVMGALASQATK|NGDFLPTR|GKITFCTGIR|LTAFVNTLNGK|VAHLALK|VSMEEQR		0.30851	0	18.2241	0
Q7TMB8	Cyfip1	Mus musculus	Cytoplasmic FMR1-interacting protein 1	14	6	0.205872	1.24638	1.98157e+06	3.17386e+06	2.31098e+06	1.99878e+06	1.54334e+06	2.22608e+06	2140364	T	46	1	0.488255	0.317746	145148	TVLPFSQEFQR|YSNSEVVTGSGR|LMNFMYFQR|SGDGESTPVEHVR|VSAAMYK|NVIQSVLQAIRK	YAPLHLVPLIER|LGTPQQIAIAR|TMLESLIADKSGSKK|TMLESLIADK|HVQLLGR|TVEVLEPEVTK|NAFVTGIAR|GLQVLMGR	0.10934	0	12.2687	0
P09103	P4hb	Mus musculus	Protein disulfide-isomerase	19	19	0.205911	0.794781	2.59569e+06	3467086	3.77011e+06	3.37232e+06	4924020	3.39619e+06	4.88124e+06	T	103	1	0.487669	-0.331371	57022.8	MDSTANEVEAVKVHSFPTLK|HNQLPLVIEFTEQTAPK|ILFIFIDSDHTDNQR|IKPHLMSQEVPEDWDKQPVK|KSNFEEALAAHK|DALEEEDNVLVLKK|TVIDYNGER|EADDIVNWLK|SNFEEALAAHK|LITLEEEMTK|QLAPIWDKLGETYKDHENIIIAK|YQLDKDGVVLFKK|THILLFLPK|ALAPEYAK|ILEFFGLK|FDEGRNNFEGEITKEK|SVSDYDGKLSSFKR|YKPESDELTAEK|TLDGFKK		0.46365	0	16.1346	0
Q8BFQ4	Wdr82	Mus musculus	WD repeat-containing protein 82	3	3	0.206923	1.28255	364988	436930	309710	292267	210964	277101	391983	T	9	1	0.490432	0.359016	35056.5	YTHAANTVVYSSNKIDDTIR|SFDKGPFATFK|LTDSVLR		0.12141	0	16.2676	0
Q6PGG6	Gnl3l	Mus musculus	Guanine nucleotide-binding protein-like 3-like protein	5	5	0.207047	1.15173	412750	326561	477972	337726	340266	340242	375397	T	6	1	0.490117	0.203808	65153.5	KVTSRPSSAPQIVHGNDHASR|IADAIENR|CKVPVDQASESLLK|AVLADWVSGK|IGNLTGYCTKPNRNQMGWPK		0.12652	0	10.1753	0
Q9CPT5	Nop16	Mus musculus	Nucleolar protein 16	4	4	0.20713	1.52557	439184	182101	448396	164980	189521	297807	234460	T	6	1	0.489818	0.609353	21126	YMVENHGEDYKAMAR|DEKNYYQDTPK|FGYNVNR|DLIDYVR		0.22472	0	12.0601	0
Q9CPQ8	Atp5mg	Mus musculus	ATP synthase subunit g, mitochondrial	2	2	0.208448	0.758253	297470	382071	315101	581007	502102	428093	285944	T	12	1	0.493309	-0.399249	11417.2	APSMVAAAVTYSKPR|LATFWHYAK		0.23301	0	17.1746	0
Q60596	Xrcc1	Mus musculus	DNA repair protein XRCC1	1	1	0.208483	1.48732	127734	118500	155992	53226.8	116936	143056	72160.5	T	4	1	0.492797	0.572713	68928.6	TPAAAPASTPAQR		0.0206	0	14.2518	0
Q99LX5	Mmtag2	Mus musculus	Multiple myeloma tumor-associated protein 2 homolog	4	4	0.208508	0.740905	289467	328387	342204	574164	547036	272202	403060	T	8	1	0.49221	-0.43264	29281	LLGLGSASGSAGR|EAEREALLAALGYK|LGLSVFTHHR|VDSEGPSTAPTAPR		0.19615	0	10.2143	0
P18572	Bsg	Mus musculus	Basigin	2	2	0.208525	0.685697	242524	403116	310988	465046	635652	261853	554542	T	8	1	0.491648	-0.544357	42418.3	VLQEDTLPDLHTK|SEINVEGPPR		0.05913	0.000503778	9.12166	4.14662e-05
Q6ZPJ3	Ube2o	Mus musculus	(E3-independent) E2 ubiquitin-conjugating enzyme UBE2O	4	4	0.209336	1.22092	236864	217199	278034	188500	154369	255730	209993	T	5	1	0.493199	0.287966	140746	IGNTEDGALPKEDEPSVGQVAR|LLFSHDLVSGR|LVNRIESWLETHAMQER|IFSSVQWLSGVKPVLSTK		0.0528	0	11.2206	0
P28652|Q923T9	Camk2b|Camk2g	Mus musculus	Calcium/calmodulin-dependent protein kinase type II subunit beta|Calcium/calmodulin-dependent protein kinase type II subunit gamma	4	0	0.209927	1.21358	249860	258736	204957	157298	173557	246228	215038	T	13	2	0.49466	0.279264	60422.67061557431|59569.31447361895		DLKPENLLLASK|STVASMMHR|LTQYIDGQGRPR|NLINQMLTINPAKR	0.08672|0.08885	0	10.2276	0
Q8R0A0	Gtf2f2	Mus musculus	General transcription factor IIF subunit 2	3	3	0.210442	0.719419	304123	339238	380602	608139	690817	378097	313668	T	11	1	0.495284	-0.475096	28363.8	AERGELDLTGAK|RLQIEESSKPVR|TEVSFTLNEDLANIHDIGGKPASVSAPR		0.20884	0	12.1688	0
Q9R0X4	Acot9	Mus musculus	Acyl-coenzyme A thioesterase 9, mitochondrial	11	5	0.210715	1.2049	1.16901e+06	1.63868e+06	1.29628e+06	1.26905e+06	907693	1.30081e+06	1.06475e+06	T	39	1	0.495483	0.268914	50528	NIIHELFLTTLDPK|VHSEVSSLDSR|ISEPLHIHQVR|DSENKGPAFVNPLIPENKEEEELFK|EIVGVSTVWR	HSLSPEQDIK|IAFSTSSLLK|TYGESMLYLDGQR|SLDICHPQER|YVTVQNTVR|AVWMEDTKLK	0.30296	0	14.3257	0
P11103	Parp1	Mus musculus	Poly [ADP-ribose] polymerase 1	45	44	0.210952	1.19486	11943148	14271032	10670441	10205035	8.11428e+06	10713512	12276634	T	325	1	0.495493	0.25684	113028	KFYPLEIDYGQDEEAVKK|VADGMAFGALLPCKECSGQLVFK|VEMLDNLLDIEVAYSLLR|NTHATTHNAYDLEVIDIFKIER|KFYPLEIDYGQDEEAVK|TTNFAGILSQGLR|IAPPEAPVTGYMFGK|VVDRDSEEAEVIRK|ALVEYEIDLQKMPLGK|GGSDDSSKDPIDVNYEK|SDAYYCTGDVTAWTK|KPPLLNNADSVQAK|KMVDPEKPQLGMIDR|GGAAVDPDSGLEHSAHVLEK|AQNELIWNIKDELKK|KGDEVDGTDEVAK|ACSTNDLKELLIFNQQQVPSGESAILDR|RKGDEVDGTDEVAK|VVDRDSEEAEVIR|VFSATLGLVDIVK|GFSLLSAEDKEALKK|MAIMVQSPMFDGK|AQNELIWNIKDELK|L…	MVDPEKPQLGMIDR	0.46199	0	21.2581	0
Q80U78	Pum1	Mus musculus	Pumilio homolog 1	6	4	0.211892	1.20946	981072	595613	795964	575114	652347	718618	624674	T	15	1	0.497589	0.274358	126541	QHGEQLGGGGSGGGGYNTSK|SMDELNHDFQALALEGR|HRWPTGDNIHAEHQVR|DSLTGSSDLYKR	YISAAPGAEAK|FASNVVEK	0.07065	0	15.2338	0
P80318	Cct3	Mus musculus	T-complex protein 1 subunit gamma	38	32	0.212079	1.07884	14266108	17454302	14923488	14607435	14106166	14026035	14701516	T	319	1	0.497261	0.109478	60591.4	MMGHRPVLVLSQNTKR|KGESQTDIEITREEDFTR|IVSRPEELREDDVGTGAGLLEIK|MMGHRPVLVLSQNTK|KIGDEYFTFITDCKDPK|AVAQALEVIPR|GASKEILSEVER|TAVETAVLLLR|IPGGIIEDSCVLR|VEKIPGGIIEDSCVLR|TLIQNCGASTIR|EMMLSIINSSITTK|IGDEYFTFITDCKDPK|IVLLDSSLEYK|AMTGVEQWPYR|EIQVQHPAAK|ELGIWEPLAVK|ILQMEEEYIHQLCEDIIQLKPDVVITEK|TVQFEENGRK|ISTPVDVNNR|TVQFEENGR|WSSLACNIALDAVK|TQDEEVGDGTTSVIILAGEMLSVAEHFLEQQMHPTVVISAYR|KISTPVDVNNR|ISTPVDVNNREMML…	NVLLDPQLVPGGGASEMAVAHALTEK|GISDLAQHYLMR|MALDDMISTLKK|MALDDMISTLK|NLQDAMQVCR|GVMINKDVTHPR	0.77615	0	21.2424	0
Q8R5H1	Usp15	Mus musculus	Ubiquitin carboxyl-terminal hydrolase 15	6	5	0.212114	0.690134	365447	426116	374140	949414	675592	405768	382557	T	18	1	0.496675	-0.535052	112254	NNTEDKLYNLLLLR|LFTFQFNNLGNNDINYIKDDTSHIR|SLEVYLVR|MIVTDIYNHR|MSTETEETDGHLR	STLVCPECAK	0.08155	0	9.12743	0
Q61425	Hadh	Mus musculus	Hydroxyacyl-coenzyme A dehydrogenase, mitochondrial	5	5	0.212118	0.808007	294748	428940	488163	411446	557428	474469	525832	T	12	1	0.49609	-0.307561	34441.9	GDASKEDIDTAMK|TLGKHPVSCKDTPGFIVNR|FAGLHFFNPVPMMK|TGEGFYK|FTENPKAGDEFVEK		0.21338	0	10.1359	0
Q62465	Vat1	Mus musculus	Synaptic vesicle membrane protein VAT-1 homolog	1	1	0.212646	0.728647	99042.6	128085	120832	154728	249287	103813	156584	T	6	1	0.496833	-0.456708	43069	VLLVPGPEKET		0.02709	0.000503778	9.18884	4.14662e-05
Q3TJ91	Llgl2	Mus musculus	LLGL scribble cell polarity complex component 2	2	2	0.212742	1.34742	128661	155483	212534	81439	115973	144339	153282	T	2	1	0.496588	0.430202	114251	TLYFADTYLR|TVEHGFPHQPSALGYSPSLR		0.02921	0.000503778	9.14919	4.14662e-05
Q921S7	Mrpl37	Mus musculus	Large ribosomal subunit protein mL37	2	2	0.212861	1.35832	97934.6	187787	123006	73817.4	85081.1	110296	125936	T	3	1	0.496272	0.441818	48310.4	KVLSLVDDPANHIENQEQR|FLALYLHGVV		0.06856	0	13.1481	0
Q4VA53	Pds5b	Mus musculus	Sister chromatid cohesion protein PDS5 homolog B	1	1	0.213105	1.32596	183868	116798	230582	133234	101028	130575	155354	T	2	1	0.496385	0.407033	164315	TANVLGAVNKPLSSAGK		0.01176	0	15.1127	0
Q8R1B4	Eif3c	Mus musculus	Eukaryotic translation initiation factor 3 subunit C	28	27	0.213302	1.05721	6.71561e+06	7.1923e+06	6.44673e+06	6206644	6205676	6871431	6383326	T	201	1	0.496323	0.0802658	105465	RLDEEEEDNEGGEWER|TEPTAQQNLALQLAEK|AKELLGQGLLLR|DAHNALLDIQSSGR|DLMLMSHLQDNIQHADPPVQILYNR|LGSLVENNER|CLEEFELLGK|TCHSFIINEK|KLNEILQVR|QGTYGGYFR|VWDLFPEADKVR|GCILTLVER|ELLGQGLLLR|SIVDKEGVPR|DKRFEELTNLIR|GTEITHAVVIKK|SKRLDEEEEDNEGGEWER|QPLLGPPESMR|QPLLLSEDEEDTKR|KIQEESLR|RFEELTNLIR|QLTPPEGSSK|GTEITHAVVIK|VGERQPLLGPPESMREHVVAASK|MDEEFTK|LGSLVENNERVFDHK|DGYRKNEGYMR	MIINEELMASLDQPTQTVVMHR	0.31504	0	19.3224	0
Q64261	Cdk6	Mus musculus	Cyclin-dependent kinase 6	2	2	0.213333	0.840094	131603	160794	128295	184106	139183	202703	146386	T	2	1	0.495775	-0.251378	37005.1	HLETFEHPNVVR|FVTDIDELGKDLLLK		0.08282	0.000503778	9.15499	4.14662e-05
Q6PB44	Ptpn23	Mus musculus	Tyrosine-protein phosphatase non-receptor type 23	2	2	0.21361	1.24621	197307	135121	128915	110502	103015	155076	121819	T	5	1	0.495944	0.317543	185100	LIEQDPYEHPER|ASFTNSELHR		0.013	0.000503778	9.13826	4.14662e-05
Q9DB77	Uqcrc2	Mus musculus	Cytochrome b-c1 complex subunit 2, mitochondrial	10	10	0.213738	0.900488	1.89249e+06	2.07624e+06	2430661	2592050	2.36374e+06	2.27613e+06	2.20984e+06	T	62	1	0.495715	-0.151221	48205	AVAQGNLSSADVQAAK|GNNTTSLLSQSVAK|AGSRYEDSNNLGTSHLLR|MALVGLGVSHSVLK|AVAFQNSQTR|IIENLHDVAYK|YEDSNNLGTSHLLR|LASSLTTK|RWEVAALR|SMAASGNLGHTPFLDEL		0.25607	0	17.424	0
Q9DBE9	Ftsj3	Mus musculus	pre-rRNA 2'-O-ribose RNA methyltransferase FTSJ3	4	4	0.213976	1.07583	480849	477715	461921	405945	466341	412505	480204	T	6	1	0.495627	0.105445	95473.9	ILDPEGLALGAVIASSK|AANPVDFLSK|AEGYAEGDLTLYHR|FAFKEVEVQAK		0.06205	0	13.1894	0
Q6P9R1	Ddx51	Mus musculus	ATP-dependent RNA helicase DDX51	4	4	0.214707	1.30747	233773	362419	362654	171143	285091	287433	234813	T	7	1	0.496512	0.38678	70324.2	LVDHIDQTPGFSLQQLR|ALFHIAR|VALVTGQK|VFNIYTDTTPLR		0.06886	0	16.1064	0
Q9CX53	Gemin6	Mus musculus	Gem-associated protein 6	1	1	0.215009	1.57037	76414.5	92142.7	78027.8	45678.7	26386.5	88990.4	68982.4	T	5	1	0.496833	0.651103	18738.4	NHIPVTEQGDAQR		0.07831	0.000503778	9.16441	4.14662e-05
Q9D1M4	Eef1e1	Mus musculus	Eukaryotic translation elongation factor 1 epsilon-1	4	4	0.215818	1.21267	393127	525725	384817	369626	285517	441043	339792	T	15	1	0.497998	0.278189	19846.4	AMVQQWLEFR|SLGLKPGNK|QASKEHLLGSTAEEK|EHLLGSTAEEK		0.1954	0	11.1694	0
Q8BFR5	Tufm	Mus musculus	Elongation factor Tu, mitochondrial	26	26	0.215947	1.10878	7.74504e+06	7.1777e+06	7522442	6150803	6.03213e+06	7.63037e+06	7308605	T	185	1	0.497787	0.148967	49477	TIGTGLVTDVPAMTEEDKNIK|LLDAVDTYIPVPTR|DLDKPFLLPVESVYSIPGR|GITINAAHVEYSTAAR|DKPHVNVGTIGHVDHGKTTLTAAITK|HYAHTDCPGHADYVK|KYEEIDNAPEER|KGDECELLGHNK|AEAGDNLGALVR|SLERAEAGDNLGALVR|FKKYEEIDNAPEER|KGDECELLGHNKNIR|TVVTGIEMFHK|YEEIDNAPEER|QIGVEHVVVYVNK|DKPHVNVGTIGHVDHGK|QIGVEHVVVYVNKADAVQDSEMVELVELEIR|GTVVTGTLER|TTLTAAITK|NMITGTAPLDGCILVVAANDGPMPQTR|ILAEGGGAK|DLDKPFLLPVESVYSIPGRGTVVTGTLER|EHLLLAK|QPMILEK|GL…		0.62611	0	18.1358	0
Q03147	Cdk7	Mus musculus	Cyclin-dependent kinase 7	1	1	0.216381	1.11789	115426	99310.9	119717	89293.1	92646.4	105891	111473	T	4	1	0.498406	0.160783	38943.5	DKNTNQIVAIKK		0.03468	0.0087116	8.11318	0.000741629
Q9CQY5	Magt1	Mus musculus	Magnesium transporter protein 1	2	2	0.216426	1.82634	68543.7	226438	253417	55980.4	67206.1	133684	110957	T	3	1	0.497907	0.868956	37944.4	GFSAEQIAR|RADTYELQVR		0.05672	0.000503778	10.1161	4.14662e-05
Q6PF93	Pik3c3	Mus musculus	Phosphatidylinositol 3-kinase catalytic subunit type 3	1	1	0.217516	1.18048	66077.2	65622.5	55332.5	52891.8	51457.9	66250.3	42578	T	2	1	0.499912	0.239372	101423	SGPSDHDLKPNATTR		0.01691	0.00335731	8.10189	0.000312806
Q99MD9	Nasp	Mus musculus	Nuclear autoantigenic sperm protein	17	17	0.218683	0.912933	6.82802e+06	5.55195e+06	6.82616e+06	6523344	6.97222e+06	7.10861e+06	7342444	T	135	1	0.502393	-0.131419	83902.7	KPTDGASSSNCVTDISHLVR|SADVGGEEPKDQVATSESELGK|EFRETVEEGEEIISLEK|VVEIEAEIDPQVK|EAEGSFTEYEKEIEELKELLPEIR|HLVMGDIPAAVNAFQEAASLLGK|SGNVAELALK|EAQLYAAQAHLK|LQETVEPTSK|ATEKAPEDKFK|SISGAYVQNK|ETSEDQPIRAAEK|KLLGLGQK|SISGAYVQNKEFR|ETSEDQPIR|SLLELAR|MAVLHEQMK		0.27038	0	24.2278	0
Q9R210	Tfeb	Mus musculus	Transcription factor EB	2	1	0.218816	0.727906	107086	142812	177486	253823	231413	123416	186048	T	8	1	0.502159	-0.458176	52581.2	FAAHVSPAQGSPKPAPAASPGVR	ASVDYIR	0.06316	0	10.0904	0
P40630	Tfam	Mus musculus	Transcription factor A, mitochondrial	3	3	0.218865	1.18416	712339	548151	693890	576332	453943	510146	668072	T	9	1	0.501608	0.243867	27969.6	QAYIQLAKDDR|FSTEQLPK|LVNEAWK		0.107	0.000503778	9.10331	5.37324e-05
Q60865	Caprin1	Mus musculus	Caprin-1	26	25	0.219095	1.23629	18625600	11740567	18308024	11847656	11679322	15771058	12469674	T	221	1	0.50157	0.306023	78120.8	SSGPPPPSGSSGSEAAAGAAAPASQHPATGTGAVQTEAMK|LNQDQLDAVSKYQEVTNNLEFAK|QGLSGVPILSEEELSLLDEFYK|LKTVLELQYVLDKLGDDDVR|GPANGFRGGYDGYRPSFSNTPNSGYSQSQFTAPR|TVLELQYVLDKLGDDDVR|TVLELQYVLDKLGDDDVRTDLK|LNEQYEHASIHLWDLLEGK|GGYDGYRPSFSNTPNSGYSQSQFTAPR|LNQDQLDAVSK|YQEVTNNLEFAK|LNEQYEHASIHLWDLLEGKEKPVCGTTYK|GKLDDYQER|LVDPERDMSLR|EQLMREEAEQKR|YQEVTNNLEFAKELQR|QILGVIDKK|EQLMREEAEQK|LDDYQER|DGYQQNFK|QILGVIDK|DYSGYQR|RE…	SFMALSQDIQK	0.35644	0	25.2701	0
Q9JIM1	Slc29a1	Mus musculus	Equilibrative nucleoside transporter 1	2	2	0.219099	1.2358	216772	332060	245866	265274	178960	223784	186131	T	5	1	0.500993	0.305442	50159.1	ALADPTVALPAR|REESGVPGPNSPPTNR		0.06087	0	13.1799	0
Q9D0R2	Tars1	Mus musculus	Threonine--tRNA ligase 1, cytoplasmic	25	24	0.219716	1.07024	4849075	5.52743e+06	5.34778e+06	4.87805e+06	4.89428e+06	5.26691e+06	4.54701e+06	T	122	1	0.502443	0.0979339	83302.8	LADFGVLHRNELSGALTGLTR|GFQEVVTPNIFNSR|IGRDQELYFFHELSPGSCFFLPK|NSSTYWEGKADMETLQR|FMADTDLDPGCTLNKK|NELSGALTGLTR|TTPYQIACGISQGLADNTVVAK|IHKNSSTYWEGKADMETLQR|VNTPTTTVYR|IYGISFPDPK|DSKPIKVTLPDGK|TVYSVFGFSFK|DGGGDGGRAELNPWPEYINTR|IDIQIKDAIGR|QVDAESWK|ADMETLQR|ILNEKVNTPTTTVYR|LKAEHDSILAEK|ETLLEMFK|SKDGGGDGGRAELNPWPEYINTR|MDGEKPVDASEEK|LLKEWEK|FLGDIEIWNQAEK|SKQAEEEF	NAQLAQYNFILVVGEKEK	0.39612	0	21.2707	0
Q6PDQ2	Chd4	Mus musculus	Chromodomain-helicase-DNA-binding protein 4	31	23	0.219732	1.13256	4.16524e+06	4165243	4.93975e+06	4273145	3446648	4.40822e+06	3.5372e+06	T	100	1	0.501867	0.179589	217614	LLDRNQDETEDTELQGMNEYLSSFK|RHDYWLLAGIINHGYAR|GGGNQVSLLNVVMDLKK|YAILNEPFKGEMNR|AIIRENEFSFEDNAIR|IDGGITGNMR|NDKDKPLPPLLAR|ERTEEPMETEAK|ESMAGNKPANAVLHK|IGVMSLIR|GTTEVEKVEEK|FAEVECLAESHQHLSK|FAEMEER|NFEALNAR|LANRAPEPPPQQVAQQQ|YGIKPEWMMIHR|VQEFEHVNGR|GNFLEIK|MPNGMYDGSALIR|KKVQEFEHVNGR|QLEELLSDMKADVTRLPATIAR|VLNGYSLQHK|AFSQFVRPLIAAK	VGGNIEVLGFNAR|HHYEQQQEDLAR|QEAIDRFNAPGAQQFCFLLSTR|WQDIQNDPR|KAFLNAIMR|AYVSLFMR|AFLNAIMR|FKLLEQALVIEEQLRR	0.20052	0	20.4347	0
Q99NH0	Ankrd17	Mus musculus	Ankyrin repeat domain-containing protein 17	14	14	0.220898	1.1957	1.63106e+06	1.03383e+06	1.28503e+06	1.10951e+06	1.04669e+06	953504	1.23882e+06	T	30	1	0.504014	0.257861	274043	RLTSSVSCALDEAAAALTR|LEALLEAAGIGK|LTSSVSCALDEAAAALTR|LLLSGTADGADLR|QEVVELLLAR|LKDGSTMLIEAAK|DTALTIAADKGHYK|QATQLINALIKDPDKEIDELIPK|KLEEIEAK|TEVVSLLLDRK|TEVVSLLLDR|TVDPETQAR|AFADPEVLRR|TVDPETQARLEALLEAAGIGK		0.05417	0	15.2043	0
Q08091	Cnn1	Mus musculus	Calponin-1	6	6	0.221696	0.817218	833461	727192	694382	857437	1.27435e+06	875243	739388	T	11	1	0.505661	-0.291206	33334.6	GPAYGLSAEVK|VNESTQNWHQLENIGNFIK|RIGNNFMDGLKDGIILCEFINK|NIIGLQMGTNK|GMTVYGLPR|GASQAGMTAPGTKR		0.28956	0	12.2554	0
P61222	Abce1	Mus musculus	ATP-binding cassette sub-family E member 1	33	33	0.221992	1.16483	7948235	10430040	8.19287e+06	8.31164e+06	6135210	7.97752e+06	7971692	T	204	1	0.505961	0.220124	67271	VALALCLGKPADVYLIDEPSAYLDSEQR|LPIPRPGEVLGLVGTNGIGK|TQAIVCQQLDLTHLK|CPFGALSIVNLPSNLEKETTHR|EGINIFLDGYVPTENLR|NVEDLSGGELQR|ADIFMFDEPSSYLDVK|AIIKPQYVDQIPK|LKPDEGGEVPVLNVSYKPQK|NTVANSPQTLLAGMNK|GTVGSILDRKDETK|TQAIVCQQLDLTHLKER|GSELQNYFTK|FACAVVCIQK|INKLNSIKDVEQK|FLSQLEITFR|VAETANEEEVKK|KCPFGALSIVNLPSNLEK|GTVGSILDR|QKPNLGKYDDPPDWQEILTYFR|FRDASLVFK|VIVFDGVPSK|ILEDDLKAIIKPQYVDQIPK|MCMYKYPGMK|LCIEVTPQSK|D…		0.60935	0	23.4018	0
Q8R1F1	Niban2	Mus musculus	Protein Niban 2	6	6	0.222186	1.12024	893019	1.03486e+06	1.00706e+06	862568	850805	1.02724e+06	765350	T	31	1	0.505685	0.163808	84765	IIFSGNLFQYQEDNKK|FQELIFEDFAR|FDVSSTSVFK|LSQLAYHPLK|AVINSAGYK|MEPLRLDGLQQR		0.09079	0	13.1182	0
P14148	Rpl7	Mus musculus	Large ribosomal subunit protein uL30	34	30	0.222576	1.31025	23535896	30143838	44473324	23294376	18927428	30516512	25142584	T	366	1	0.506021	0.389843	31399.7	TTHFVEGGDAGNREDQINR|KTTHFVEGGDAGNREDQINR|KAGNFYVPAEPK|IALTDNSLIAR|RIALTDNSLIAR|IVEPYIAWGYPNLK|FKEANNFLWPFKLSSPR|KVPAVPETLKK|VPAVPETLK|VATVPGTLK|FKEANNFLWPFK|VATVPGTLKK|LRQIFNGTFVK|SVNELIYKR|AGNFYVPAEPK|KKVPAVPETLK|KKVATVPGTLK|KVPAVPETLK|MEAVPEKKK|EANNFLWPFK|QIFNGTFVK|MEAVPEK|KVATVPGTLKK|SVNELIYK|IRGINGVSPK|LNKASINMLR|GINGVSPK|AKHYHKEYR|KVLQLLR|QIFNGTFVKLNK	FGIICMEDLIHEIYTVGKR|MEAVPEKK|VPAVPETLKK|ASINMLR	0.67407	0	20.2697	0
Q8CHW4	Eif2b5	Mus musculus	Translation initiation factor eIF-2B subunit epsilon	4	4	0.223267	1.08823	300955	364061	332476	298826	309002	281709	331014	T	4	1	0.506952	0.121988	80036.3	LKGYNPAEVGLEGQGYLWK|AEGVNSKEDEELR|CHEDNVVMAVDSATNR|VAAGAQIHQSLLCDR		0.08787	0	10.1736	0
Q3UJB9	Edc4	Mus musculus	Enhancer of mRNA-decapping protein 4	29	29	0.223399	1.19279	7.04328e+06	5.45125e+06	4.7895e+06	4.26772e+06	4.16333e+06	5.38643e+06	5397911	T	91	1	0.506644	0.254336	152389	GHSTCLSEGALSPDGTVLATASHDGFVK|ASCASIDIEDATQHLR|SLEPVAGQLSNSVATK|LGTQEYLQQLESHMK|ELAELWHNQEELLQR|LCAQLEGLQSTVTDHVER|SCQAMFQQINDSFR|LTEHQVAEPPEDWPALIWQQQR|AAADTLQGPMQAAYR|LTAVEGSMKENISK|SDLKLSYLEEAVMHLDHSDPITR|ETCSTLTESPR|SKNLTDAIAR|FLITGADQNR|SLLPGLLPGPADK|VISVSTSER|EQEAREPVLAQLR|DHMGSVMAQVR|SLAFHRPPYHLLQQR|ALQDVQIR|EAFQSVVLPAFEK|GFGSSVPEGLIEPNSMASAASALHLLSPRPR|SLLPGLLPGPADKLISK|LTAVEGSMK|LSYLEEAVM…		0.3229	0	19.1393	0
Q9D2G2	Dlst	Mus musculus	Dihydrolipoyllysine-residue succinyltransferase component of 2-oxoglutarate dehydrogenase complex, mitochondrial	2	2	0.223416	2.55064	194172	228056	245687	31301.6	36835.9	148883	331795	T	4	1	0.506141	1.35086	48963.5	LGFMSAFVK|GLVVPVIR		0.03744	0.00196464	8.28143	7.70852e-05
Q8K202	Polr1e	Mus musculus	DNA-directed RNA polymerase I subunit RPA49	3	3	0.223471	1.26406	408136	259648	460723	347548	249022	297860	271124	T	8	1	0.505625	0.338067	53999.7	VGSESLNLSVAK|HFVGILNK|AAESIIDTK		0.06017	0	13.1778	0
Q9CQI3	Gmfb	Mus musculus	Glia maturation factor beta	3	2	0.223986	1.20012	925629	945156	947905	830154	1.01585e+06	747274	596000	T	18	1	0.506104	0.263175	16712.4	LVVLDEELEGVSPDELKDELPERQPR|NTEDLTEEWLREK	LVQTAELTK	0.33803	0	16.21	0
Q00PI9	Hnrnpul2	Mus musculus	Heterogeneous nuclear ribonucleoprotein U-like protein 2	2	2	0.224011	2.36549	201659	172659	297597	20388.6	117138	183555	164581	T	3	1	0.505608	1.24214	84887.8	KVVVVVPNEEDWKR|AYYEFREEAYHSR		0.03624	0	11.1926	0
P80313	Cct7	Mus musculus	T-complex protein 1 subunit eta	31	29	0.224085	1.08232	12000110	14321686	12515655	12698024	11333092	11325932	12414355	T	235	1	0.5051	0.114131	59614.1	INALTAASEAACLIVSVDETIKNPR|QLCDNAGFDATNILNK|EGTDSSQGIPQLVSNISACQVIAEAVR|IALLNVELELKAEKDNAEIR|QVKPYVEEGLHPQIIIR|GGAEQFMEETER|GKATISNDGATILK|GMDKLIVDGR|TFSYAGFEMQPK|QLCDNAGFDATNILNKLR|ATISNDGATILK|LLDVVHPAAK|IALLNVELELK|TIPGKQQLLIGAYAK|CAMTALSSK|QQLLIGAYAK|TATQLAVNK|VQGGALEESQLVAGVAFKK|YNFFTGCPK|LPIGDVATQYFADRDMFCAGR|YLRDYSR|STVDPPAPSAGR|TCTIILR|SLHDAIMIVRR|ALEIIPR|IKEIAVTVK|VPEEDLKR|TLVDIAK|KTFSYAG…	SLHDAIMIVR|MMPTPVILLK	0.59743	0	21.359	0
P08003	Pdia4	Mus musculus	Protein disulfide-isomerase A4	3	3	0.225209	0.806847	254114	231058	302340	233755	386958	313520	385307	T	4	1	0.507092	-0.309633	71937.5	IASTLKDNDPPIAVAK|VDATEQTDLAK|RFDVSGYPTLK		0.05956	0.00567644	8.09959	0.000536279
Q8BFZ9	Erlin2	Mus musculus	Erlin-2	7	5	0.225429	1.33825	732929	936154	515086	446906	402953	632816	683636	T	26	1	0.506858	0.420344	37848.5	ALIEAEKVAQVAEITYGQK|VAQVAEITYGQK|IYFGKDIPNMFMDSAGGLGK|LTPEYLQLMK|NYELMESEKTK	ISEIEDAAFLAR|LLIAAQK	0.23235	0	14.3276	0
Q9CQ06	Mrpl24	Mus musculus	Large ribosomal subunit protein uL24m	3	3	0.226114	1.37917	452082	277416	342784	173845	209782	326890	349157	T	4	1	0.508041	0.463801	24929	LVDPVDRKPTEIQWR|GTMIASEAPLLHHQVK|ATSSPFYR		0.18056	0	13.1382	0
O08715	Akap1	Mus musculus	A-kinase anchor protein 1, mitochondrial	3	3	0.22633	1.52324	119518	374608	206629	100753	139213	156953	163867	T	3	1	0.508095	0.607141	92137.2	KVDLIIWEIEVPKHLVGR|TVAQVHPTSATQPK|LSSSDKQVETLK		0.05134	0	10.1985	0
P58281	Opa1	Mus musculus	Dynamin-like 120 kDa protein, mitochondrial	3	3	0.2266	1.83277	219066	157937	166318	34224.1	124453	184651	116202	T	3	1	0.508324	0.874023	111270	TSVLEMIAQAR|VVVVGDQSAGK|HKWNDFAEDSLR		0.03542	0	11.1491	0
Q71LX4	Tln2	Mus musculus	Talin-2	6	1	0.227002	1.36798	288660	537036	455170	308715	201788	357211	374161	T	22	1	0.508566	0.452043	253462	SLITSIR	SIAAATSALVK|EVANSTANLVK|TYGVSFFLVK|VMVTNVTSLLK|GITMATAK	0.02442	0	13.2606	0
Q9ES28	Arhgef7	Mus musculus	Rho guanine nucleotide exchange factor 7	3	3	0.22752	1.84094	200922	110673	196584	44767.4	54090.5	186812	137565	T	4	1	0.50976	0.880444	96995.1	KPSDEEFAVRK|GASSPGILVLTTGLSKPFMR|VIEAYCTSAK		0.04756	0.000503778	9.16324	4.14662e-05
Q4VBE8	Wdr18	Mus musculus	WD repeat-containing protein 18	6	6	0.227945	1.16303	662928	865418	713964	570773	677432	765951	561392	T	21	1	0.510233	0.217887	47181	HVWSQHTLPITDLHCGFGGPMAR|GLALLNGEYLLAAQQGK|EHSFQPEQNTGK|VFDLEDEVR|NYICAWELQR|DLFDFSTR		0.18329	0	16.1471	0
P61514	Rpl37a	Mus musculus	Large ribosomal subunit protein eL43	6	4	0.227983	0.853678	2.59692e+06	2.43675e+06	3417206	3.72192e+06	3.56387e+06	2915152	2.93356e+06	T	63	1	0.509971	-0.228236	10268.5	TVAGGAWTYNTTSAVTVK|YTCSFCGK|YGASLRK|KIEISQHAK	AVGIWHCGSCMK|RAVGIWHCGSCMK	0.59783	0	15.3178	0
Q9D0J4	Arl2	Mus musculus	ADP-ribosylation factor-like protein 2	1	1	0.228361	0.809503	60075.7	84892	70331	64950.1	93274.4	89528.1	109423	T	1	1	0.510497	-0.304891	20850.8	ELQSLLVEER		0.05435	0.00567644	8.1072	0.000545108
Q9JHU4	Dync1h1	Mus musculus	Cytoplasmic dynein 1 heavy chain 1	120	119	0.228411	1.2633	18068504	29316900	19071256	17679930	13000028	19955066	18695046	T	415	1	0.509944	0.337193	531710	KLVPLLLEDGGDAPAALEAALEEK|VLRPQVTAVAQQNQGEAPEPQDMK|GKEDEGEEAASPMLQIQR|HVPVVYVDYPGPASLTQIYGTFNR|VTDFGDKVEDPTFLNQLQSGVNR|AKEALELTDTGLLSGSEER|SRQELEQHSVDTASTSDAVTFITYVQSLK|RKDSAIQQQVANLQMK|RVEDVLGKGWENHVEGQK|RSELEEQQMHLNVGLRK|TKPVTGNLRPEEALQALTIYEGK|APVIDADKPVSSQLR|ILDDDTIITTLENLKR|VLLTTQGVDMISK|HYLDFINHYANLFHEK|TTDLLTDWEK|QTDVLQQLSIQMANAK|LGEDLNKWQALLVQIR|RAPVIDADKPVSSQLR|VWEQIDQMKEQPWVSVQPR|IQGLTVE…	MKLNTQEIFDDWAR	0.30728	0	23.2846	0
Q8CGF7	Tcerg1	Mus musculus	Transcription elongation regulator 1	2	2	0.229635	0.699683	73158.9	45023	77134	144677	60362.5	97395.5	78938	T	2	1	0.512219	-0.515227	123710	AIVPLEAR|SSDVSWSDTRR		0.01727	0.00791066	8.21457	0.000690131
P43247	Msh2	Mus musculus	DNA mismatch repair protein Msh2	44	43	0.231152	1.15356	11236668	14686441	13694889	12010681	9287324	12446582	12063627	T	276	1	0.515822	0.206096	104085	KGEQINSAALPEMENQVAVSSLSAVIK|LFDRGDFYTAHGEDALLAAR|ALNLFQGSVEDTTGSQSLAALLNK|ALELEEFQNIGTSLGCDEAEPAAK|LGLCEFPENDQFSNLEALLIQIGPK|HVGVGYVDSTQRK|FTNSELSSLNEEYTK|ECVLPGGETTGDMGK|KGVCDQSFGIHVAELANFPR|VKQVPFTAMSEESISAK|HVGVGYVDSTQR|ASKENEWYLAFK|QVPFTAMSEESISAK|SATKDSLIIIDELGR|DSLIIIDELGR|NNSFVNEIISR|QAANLQDCYR|LNLVEAFVEDSELRQSLQEDLLR|FFEGMPEKPSTTVR|ADFSTKDIYQDLNR|GKKGEQINSAALPEMENQVAVSSLSAVIK|KMQSTLINAAR|…	MQSTLINAAR	0.50267	0	21.4324	0
Q8C5Q4	Grsf1	Mus musculus	G-rich sequence factor 1	5	5	0.231403	1.20441	603819	479195	605482	370046	415456	533332	568184	T	11	1	0.515661	0.268323	53042.7	SLQVKPSPVLSDGVVR|YIELFLNSCPK|ITMEYSSSGK|NSENGIHFLLNR|ATGEADVHFDTHEDAVAAMLKDR		0.15031	0	16.3107	0
Q91VN6	Ddx41	Mus musculus	Probable ATP-dependent RNA helicase DDX41	2	2	0.231523	0.766524	152860	197788	176397	175047	309173	288213	173037	T	5	1	0.515293	-0.383597	69775	AGAASLDVIQEVEYVKEEAK|TPPPVLIFAEK		0.04984	0	12.1001	0
A2A935	Prdm16	Mus musculus	Histone-lysine N-methyltransferase PRDM16	2	2	0.232065	1.13874	1.45356e+06	1185126	1.1943e+06	981542	1.20648e+06	1.28895e+06	1.0195e+06	T	25	1	0.516129	0.187436	140769	VADPVGVLK|QISEDLGSEK		0.0149	0.000503778	9.32133	4.14662e-05
O08529	Capn2	Mus musculus	Calpain-2 catalytic subunit	7	7	0.232671	1.25421	853240	671172	611694	401985	599841	721926	573279	T	19	1	0.516724	0.326779	79821.8	DREAAEGLGSHER|SDTFINLR|NFFLTTR|KMGEDMHTIGFGIYEVPEELTGQTNIHLGK|ELGPYSSK|ERSDTFINLR|SGTMNSYEMRK		0.11286	0	15.4389	0
Q9CY21	Bud23	Mus musculus	Probable 18S rRNA (guanine-N(7))-methyltransferase	1	1	0.233163	0.611732	64161.5	98005.6	87218.6	267681	131328	142609	63945.8	T	1	1	0.517166	-0.709028	31567	AVLQLYPENSEQLELITTQATR		0.07829	0	13.4044	0
Q8BVI4	Qdpr	Mus musculus	Dihydropteridine reductase	2	2	0.233246	0.617271	62584.5	147072	142581	181856	103083	169257	311923	T	3	1	0.516819	-0.696024	25553.8	GAVHQLCQSLAGK|VLVYGGR		0.08299	0	10.0537	0
Q61656	Ddx5	Mus musculus	Probable ATP-dependent RNA helicase DDX5	42	31	0.233663	1.20326	13683849	9354385	11938270	8619582	8.10456e+06	11776742	10206506	T	295	1	0.517535	0.266946	69246.8	GHNCPKPVLNFYEANFPANVMDVIAR|TTYLVLDEADRMLDMGFEPQIR|ELAQQVQQVAAEYCR|FVINYDYPNSSEDYIHR|GLDVEDVKFVINYDYPNSSEDYIHR|TLSYLLPAIVHINHQPFLER|TGTAYTFFTPNNIK|TTYLVLDEADR|HGKAPILIATDVASR|QVSDLISVLR|LMEEIMSEKENK|TTYLVLDEADRMLDMGFEPQIRK|NFYQEHPDLAR|DGWPAMGIHGDKSQQERDWVLNEFK|TAQEVDTYR|LIDFLECGK|TAQEVDTYRR|WNLDELPKFEK|LLQLVEDR|RTAQEVDTYRR|KWNLDELPKFEK|LMEEIMSEK|QNFTEPTAIQAQGWPVALSGLDMVGVAQTGSGK|DWVLNEFK|GYSNLLKR|…	GDGPICLVLAPTR|APILIATDVASR|GVEICIATPGR|QTLMWSATWPK|MLDMGFEPQIR|LKSTCIYGGAPK|STCIYGGAPK|GLDVEDVK|IVDQIRPDR|KIVDQIRPDR|QTLMWSATWPKEVR	0.57329	0	19.3969	0
Q8BH95	Echs1	Mus musculus	Enoyl-CoA hydratase, mitochondrial	3	3	0.233763	0.88247	407065	335773	463967	451725	404443	464073	491826	T	11	1	0.517131	-0.180381	31454.2	LVEEAIQCAEK|NSSVGLIQLNRPK|SLAMEMVLTGDR		0.12414	0	11.184	0
P83870	Phf5a	Mus musculus	PHD finger-like domain-containing protein 5A	4	4	0.233864	0.742862	661977	529832	821260	1.15125e+06	1.18885e+06	618972	737369	T	29	1	0.516812	-0.428834	12397	HHPDLIFCR|TDLFYER|IVNLGSSK|QAGVAIGR		0.29091	0.000503778	9.19734	4.14662e-05
Q9CZU6	Cs	Mus musculus	Citrate synthase, mitochondrial	12	12	0.233873	1.16443	3626000	5248844	4.52194e+06	3.91851e+06	3292411	3.70061e+06	4329030	T	70	1	0.516243	0.219626	51703.4	GLVYETSVLDPDEGIR|GLVYETSVLDPDEGIRFR|EGSSIGAIDSR|IVPNILLEQGK|VVPGYGHAVLR|GYSIPECQK|SMSTDGLMK|VVPGYGHAVLRK|AYAEGMNR|LVAQLYK|ALGFPLERPK|LPCVAAK		0.21983	0	12.4431	0
Q8R010	Aimp2	Mus musculus	Aminoacyl tRNA synthase complex-interacting multifunctional protein 2	10	10	0.234004	1.32568	1.26093e+06	2.02849e+06	1115750	936235	830816	1.42023e+06	1.18642e+06	T	32	1	0.516251	0.406731	35355.2	TTSPATDAGHVQETSEPSLQALESR|SPWLVGNELTVADVVLWSVLQQTGGSSGAAPTNVQR|YRVLSTVHTHSSVK|FLFSLFGQK|AAVDGLSK|SMNSALGR|CFGEQAR|TTSPATDAGHVQETSEPSLQALESRQDDILKR|NVPENLVK|VLSTVHTHSSVK		0.38125	0	17.3073	0
Q8R1I1	Uqcr10	Mus musculus	Cytochrome b-c1 complex subunit 9	1	1	0.234971	1.63238	107140	98088.9	148577	57754.3	82266	146915	36549.1	T	2	1	0.518891	0.706975	7440.87	AFDQGADAIYEHINEGK		0.26563	0.000503778	9.07523	4.14662e-05
Q9D1M7	Fkbp11	Mus musculus	Peptidyl-prolyl cis-trans isomerase FKBP11	1	1	0.235486	0.65202	162165	248862	164920	437152	431031	233378	157521	T	7	1	0.519521	-0.617011	22123.2	IIDTSLTRDPLVIELGQK		0.08955	0	12.0753	0
Q9QZE5	Copg1	Mus musculus	Coatomer subunit gamma-1	9	8	0.235622	0.915913	1.71988e+06	2009828	2.03776e+06	1.91886e+06	2.30365e+06	2.0204e+06	2.14832e+06	T	25	1	0.519592	-0.126718	97450.4	ALQQYTLEPSEKPFDLK|ILHLLGQEGPK|ATFYLNVLEQK|TLEEAVGNIVK|FDKKDEESGGGSNPLQHLEK|SSEELPVDIILASVG|SDKVPENKNTHTLLLAGVFR|AGAVSALAK	SAVLQEAR	0.13959	0	14.1928	0
P50247	Ahcy	Mus musculus	Adenosylhomocysteinase	16	16	0.235872	0.817762	3.64138e+06	4813663	6.3303e+06	5.67242e+06	6.00806e+06	5.16694e+06	6.77088e+06	T	107	1	0.519671	-0.290248	47657.3	VAVVAGYGDVGKGCAQALR|KLDEAVAEAHLGK|VPAINVNDSVTK|VADIGLAAWGR|MMSNGILKVPAINVNDSVTK|VAVVAGYGDVGK|ALDIAENEMPGLMR|KLDEAVAEAHLGKLNVK|GISEETTTGVHNLYK|SDKLPYK|ATDVMIAGK|SKFDNLYGCR|YPQLLSGIR|WLNENAVEK|AGIPVFAWK|IILLAEGR		0.36343	0	17.3057	0
Q62074	Prkci	Mus musculus	Protein kinase C iota type	5	5	0.236164	1.1796	507070	454565	411845	347971	419413	483659	316864	T	10	1	0.519501	0.238292	68159.3	LGCHPQTGFADIQGHPFFR|DSSTMSHTVACGGGGDHSHQVR|ASSSLGLQDFDLLR|NVDWDMMEQK|DLKLDNVLLDSEGHIK		0.13613	0	12.0936	0
Q9DC71	Mrps15	Mus musculus	Small ribosomal subunit protein uS15m	4	4	0.236896	0.84416	418145	423425	620981	626672	530510	617879	504940	T	12	1	0.520486	-0.244412	29445.2	TLEAQIIALTVR|ILSLEMASR|IRNYEEHMQK|IVENPEDSRTLEAQIIALTVR		0.15504	0	12.2504	0
Q6P5E6	Gga2	Mus musculus	ADP-ribosylation factor-binding protein GGA2	1	1	0.238038	1.4456	127195	89414.1	61926.2	40681.1	56443.2	97197.9	64290	T	9	1	0.522741	0.531672	66007.4	SNHPEDLQAANR		0.0199	0.00196464	8.2755	7.70852e-05
Q91YU8	Ppan	Mus musculus	Suppressor of SWI4 1 homolog	2	2	0.238189	1.84116	262284	192866	295047	123239	47806.5	242897	223459	T	3	1	0.52231	0.880616	52723.7	VMEPLTATR|MTLQLIK		0.03404	0	9.29014	0
Q9D8C3	Alg13	Mus musculus	Putative bifunctional UDP-N-acetylglucosamine transferase and deubiquitinase ALG13	2	2	0.238362	1.42077	130795	158413	232583	103846	74835.9	151242	169961	T	2	1	0.522469	0.506669	128582	AISEQLFHSQIHHLQIR|ALDPEIYR		0.02144	0.00335731	8.11943	0.000301882
Q99JW2	Acy1	Mus musculus	Aminoacylase-1	2	2	0.238481	0.817606	125371	171578	188847	165221	167726	223526	234165	T	4	1	0.522131	-0.290523	45752.1	VISSILAFR|EGAVTSVNLTK		0.04902	0.00196464	9.08319	8.95759e-05
Q08943	Ssrp1	Mus musculus	FACT complex subunit SSRP1	4	4	0.238951	0.812271	287270	454604	465547	596502	455152	439412	460332	T	8	1	0.522585	-0.299967	80810.3	ASSGLLYPLER|FDEISFVNFAR|GFIYVHKPPVHIR|IKSDHPGISITDLSK		0.07062	0	10.2095	0
P62315	Snrpd1	Mus musculus	Small nuclear ribonucleoprotein Sm D1	4	4	0.239454	0.772369	801237	1.22557e+06	1.37808e+06	1.90416e+06	1.34971e+06	1.09581e+06	1.49345e+06	T	49	1	0.522991	-0.372638	13273.4	YFILPDSLPLDTLLVDVEPK|NREPVQLETLSIR|NGTQVHGTITGVDVSMNTHLK|LSHETVTIELK		0.54622	0	17.3616	0
Q8R080	Gtse1	Mus musculus	G2 and S phase-expressed protein 1	3	3	0.239832	0.830559	373890	224872	274812	300700	391447	339810	345749	T	9	1	0.523427	-0.267845	78703.4	GSQSDVLQDKPSTAPDAASR|KSSTSGSASSLESGVYR|QALPAAPAR		0.06208	0	11.2497	0
P19096	Fasn	Mus musculus	Fatty acid synthase	79	79	0.240581	1.14122	18767878	26089928	20342830	18873378	16852978	21116022	18812420	T	477	1	0.525341	0.190581	272257	VLVQVREEEPEAVLPGAQPTLISAISK|TLLEGSGLESIINIIHSSLAEPR|SYIITGGLGGFGLELAR|LLLPEDPLISGLLNSQALK|LGPVGGVFNLAMVLR|VLLSLEHGVWAPNLHFHNPNPEIPALLDGR|VHLTGINVNPNALFPPVEFPAPR|IPALLNTQPMLQLEYTATDRHPQALKDVQTK|ACVDTALENLSTLK|TLEAVQDLLEQGR|FPQLDDTSFANSR|SNMGHPEPASGLAALTK|CILLSNLSNTSHAPK|FPQLDDTSFANSRDTSFEQHVLLHTGGK|GNAGQTNYGFANSTMER|MEEVVIAGMSGK|VGDPQELNGITR|GVDLVLNSLAEEK|DHKDNLEFFLTNLGK|LKEDTQVADVTTSR|GGNVGINSFGF…		0.3746	0	24.1878	0
P26039	Tln1	Mus musculus	Talin-1	36	31	0.240667	0.904202	5706700	4.58569e+06	4947211	6.2169e+06	5.70242e+06	5531636	4996331	T	162	1	0.525027	-0.145283	269653	LLAALLEDEGGNGRPLLQAAK|LNEAAAGLNQAATELVQASR|MVGGIAQIIAAQEEMLRK|QAAASATQTIAAAQHAASAPK|TLAESALQLLYTAK|LASQAKPAAVAAENEEIGAHIK|AVASAAAALVLK|GLAGAVSELLR|VLGEAMTGISQNAK|AVAEQIPLLVQGVR|ALSTDPASPNLK|ASAGPQPLLVQSCK|AAMEPIVISAK|VLVQNAAGSQEK|NLGTALAELR|AGFLDLKDFLPK|KSTVLQQQYNR|TSTPEDFIR|ALGDLISATK|TLSHPQQMALLDQTK|VQELGHGCSALVTK|ILAQATSDLVNAIKADAEGESDLENSRK|AQVVSNLK|VSHVLAALQAGNR|FLPSELRDEH|AVTQALNR|ALDYYMLR|…	SIAAATSALVK|EVANSTANLVK|TYGVSFFLVK|VMVTNVTSLLK|GITMATAK	0.18261	0	17.2646	0
P62331	Arf6	Mus musculus	ADP-ribosylation factor 6	1	1	0.241811	0.790084	127079	230835	190807	185317	247069	207458	268493	T	3	1	0.526775	-0.339922	20069.4	DAIILIFANKQDLPDAMKPHEIQEK		0.14286	0	14.2499	0
Q9WUM5	Suclg1	Mus musculus	Succinate--CoA ligase [ADP/GDP-forming] subunit alpha, mitochondrial	4	4	0.241941	0.824608	982941	647978	628954	1.0118e+06	999741	778310	811247	T	16	1	0.526443	-0.27822	36132	HLGLPVFNTVK|QGTFHSQQALEYGTK|IICQGFTGK|IGIMPGHIHKK		0.13295	0	13.0948	0
B2RQC6	Cad	Mus musculus	CAD protein	65	62	0.242128	1.19635	15972710	21950474	15873557	15950995	11470050	16480476	15967748	T	368	1	0.526307	0.258636	243084	AIVHAVGQELQVTGPFNLQLIAKDDQLK|GTKQEEFESIEEALPDTDVLYMTR|VLGTSPEAIDSAENRFK|KVVEPELMGTPDGPCYPAPPVPR|VLGTSPEAIDSAENR|ASDPGLPAEEPKEKPPR|AGPSDMELLFDVFLETVR|LLDTIGISQPQWR|TLGVDLVALATR|FLSSAAAVSKEHPVVISK|IFHLPLQEDTYVEVDLEHEWTVPSHMPFSK|GTEPSALPFVDPNARPLAPEVSIKTPR|EAAAGNIGGQTVR|RVIPGLPDGR|VLGTPVETIELTEDRR|GTEPSALPFVDPNARPLAPEVSIK|GIPGLQGVDTR|IIMGEKVEPVGLMTGSGVVGVK|LRQELGICPAVK|AQGLPVTCEVAPHHLFLNREDLER|AMLST…	MAEIGEHVAPSEAANSLEQAQAAAER|EIEYEVVR|SFPFVSK	0.33528	0	23.4212	0
P04264	KRT1	Homo sapiens	Keratin, type II cytoskeletal 1	55	35	0.242543	0.489166	19965280	57519044	11017047	85180560	75311184	26613680	30158268	C	906	1	0.526736	-1.0316	65999	SKAEAESLYQSKYEELQITAGR|NKLNDLEDALQQAKEDLAR|FLEQQNQVLQTKWELLQQVDTSTR|LNDLEDALQQAKEDLAR|SLDLDSIIAEVKAQYEDIAQK|AEAESLYQSKYEELQITAGR|QISNLQQSISDAEQRGENALKDAK|THNLEPYFESFINNLR|QISNLQQSISDAEQR|NKLNDLEDALQQAK|GGGGGGYGSGGSSYGSGGGSYGSGGGGGGGR|SLNNQFASFIDKVR|SGGGFSSGSAGIINYQR|WELLQQVDTSTR|KDVDGAYMTK|SKAEAESLYQSK|FSSCGGGGGSFGAGGGFGSR|GSGGGSSGGSIGGR|NSKIEISELNR|NSKIEISELNRVIQR|QISNLQQSISDAEQRGENALK|SLNNQFASF…	MSGECAPNVSVSVSTSHTTISGGGSR|LDNLQQEIDFLTALYQAELSQMQTQISETNVILSMDNNR|FLEQQNQVLQTK|TNAENEFVTIKKDVDGAYMTK|LLRDYQELMNTK|TNAENEFVTIKK|SLDLDSIIAEVK|LDSELKNMQDMVEDYR|TNAENEFVTIK|YEELQITAGR|NKYEDEINKR|LRSEIDNVKK|RTNAENEFVTIKK|AQYEDIAQK|NMQDMVEDYR|DVDGAYMTK|DYQELMNTK|LRSEIDNVK|IEISELNR|AQYEDIAQKSK	0.65683	0	29.3779	0
Q6A068	Cdc5l	Mus musculus	Cell division cycle 5-like protein	23	23	0.242718	1.24852	6039003	3819671	6.78641e+06	3.67929e+06	4.06393e+06	5.0031e+06	4.64132e+06	T	121	1	0.526461	0.320222	92132.5	KPALGFYDTSEENYQALDADFRK|ILQEAQNLMALTNVDTPLKGGLNTPLHESDFSGVTPQR|QLNDLWDQIEQAHLELR|SKLVLPAPQISDAELQEVVK|AQDALVQEMEVVK|TPSNGAEGLTPR|LGLLGLPAPK|TAAQCLEHYEFLLDK|RLECLKEDVQR|LVLPAPQISDAELQEVVK|TFEELKKHEDSAIPR|GVDYNAEIPFEK|SGTTPKPVTNATPGR|QTAEESGITNSASSTLLSEYNVTNNSIALR|ILLGGYQSR|TIAPIIGR|VGQASEVAR|KKESDLPSAILQTSGVSEFTK|AAGIEIQK|NTEDEILK|DLPRPSEVNETILRPLNVEPPLTDLQK|DRIESLEKR|LMPTQWR		0.4202	0	20.266	0
Q8CCP0	Nemf	Mus musculus	Ribosome quality control complex subunit NEMF	6	6	0.243215	1.15074	515527	536096	552271	559101	382641	518152	419638	T	9	1	0.527005	0.202566	121112	AVLAELNASLLGMR|TALNSFMHSK|AAEPLLTLER|LAPREESLNSNDSK|ESAVHTEAYQNTSK|EVQTVTSIQK		0.06767	0	15.0713	0
Q9EQU5	Set	Mus musculus	Protein SET	13	13	0.24394	0.74504	1.26829e+06	1.99997e+06	2.08246e+06	1.71464e+06	2.67596e+06	1.94931e+06	3.33814e+06	T	74	1	0.527587	-0.42461	33357.7	VEVTEFEDIKSGYR|VEVTEFEDIK|EFHLNESGDPSSK|IDFYFDENPYFENK|QSAILPQPK|SGYRIDFYFDENPYFENK|LRQPFFQKR|RQSAILPQPK|EQQEAIEHIDEVQNEIDRLNEQASEEILKVEQK|VLSKEFHLNESGDPSSK|STEIKWK|SASPGLPK|LRQPFFQK		0.38754	0	13.2398	0
Q3TZX8	Nol9	Mus musculus	Polynucleotide 5'-hydroxyl-kinase NOL9	7	7	0.243951	1.18513	643578	755608	689438	614013	590792	732697	444206	T	22	1	0.527068	0.24505	80788.3	AESEVLHR|QVAPAGAHVAVK|VSPNVTQPVRDLGSGR|VSPNVTQPVR|LDDRNWVVR|AHALGGDWK|IVDDMKGYTR		0.08964	0	11.2009	0
O35643	Ap1b1	Mus musculus	AP-1 complex subunit beta-1	8	2	0.244212	1.55192	322545	449208	346053	249262	108693	363260	323864	T	19	1	0.527133	0.63405	103869	LLSTDPVAAK|VIASMTVGK	KGEIFELK|NVEGQDMLYQSLK|CAIKVEQSAER|NINLIVQK|LVYLYLMNYAK|ITEYLCEPLRK	0.0859	0	11.226	0
P99024	Tubb5	Mus musculus	Tubulin beta-5 chain	35	6	0.244337	1.21951	15224403	22944042	15461586	16656633	11796251	16464687	13243132	T	882	1	0.5268	0.286303	49639	FWEVISDEHGIDPTGTYHGDSDLQLDR|MAVTFIGNSTAIQELFK|ALTVPELTQQVFDAK|ISVYYNEATGGK|ISVYYNEATGGKYVPR|FWEVISDEHGIDPTGTYHGDSDLQLDRISVYYNEATGGKYVPR	SGPFGQIFRPDNFVFGQSGAGNNWAK|KEAESCDCLQGFQLTHSLGGGTGSGMGTLLISK|GHYTEGAELVDSVLDVVR|GHYTEGAELVDSVLDVVRK|EAESCDCLQGFQLTHSLGGGTGSGMGTLLISK|MSMKEVDEQMLNVQNKNSSYFVEWIPNNVK|LTTPTYGDLNHLVSATMSGVTTCLR|KLAVNMVPFPR|MAVTFIGNSTAIQELFKR|TLKLTTPTYGDLNHLVSATMSGVTTCLR|MSMKEVDEQMLNVQNK|AILVDLEPGTMDSVR|LHFFMPGFAPLTSR|EVDEQMLNVQNK|FPGQLNADLR|FPGQLNADLRK|LAVNMVPFPR|IMNTFSVVPSPK|IREEYPDRIMNTFSVVPSPK|ISEQFTAMFR|EVDEQMLNV…	0.72523	0	26.2724	0
Q9CY50	Ssr1	Mus musculus	Translocon-associated protein subunit alpha	1	1	0.244765	0.868135	263809	215105	306671	346619	297056	287771	267955	T	12	1	0.527251	-0.204008	32045.1	FLVGFTNK		0.02797	0.000503778	9.25256	3.2533e-05
Q5SF07	Igf2bp2	Mus musculus	Insulin-like growth factor 2 mRNA-binding protein 2	8	7	0.245682	1.27054	902475	710640	803562	417175	632839	777555	772412	T	21	1	0.528804	0.345437	65543.3	LSGHQFEDYSFK|IAPAEGPDVSER|ENSGAAEKPVTIHATPEGTSEACR|YPQGVAPQR|IIGHFFASQTAQR|EADETKLAEEVPLK|QIDFPLR	MVIITGPPEAQFK	0.17568	0	13.439	0
Q9CU65	Zmym2	Mus musculus	Zinc finger MYM-type protein 2	1	1	0.245794	1.34234	40394.6	74580.4	78508.4	58498.1	53088.2	40431	35879	T	1	1	0.528752	0.424755	154541	QLDEDLLVLDELKSSK		0.01163	0.000503778	9.08606	4.14662e-05
Q8BTS4	Nup54	Mus musculus	Nuclear pore complex protein Nup54	2	2	0.246267	1.94021	228258	198000	225998	36091.4	93491.3	207020	223880	T	3	1	0.529375	0.956213	55697.5	SQQQQLVESLHK|LNELMSQIR		0.04118	0.0061263	8.08178	0.00058696
Q9DCJ7	Aurkaip1	Mus musculus	Small ribosomal subunit protein mS38	1	1	0.246932	1.99908	145071	164452	189093	142581	22930.5	156536	91198.6	T	2	1	0.530098	0.999334	23285.7	AGLKEAPENWQTPK		0.07	0.0061263	8.13112	0.000565758
O35621	Pmm1	Mus musculus	Phosphomannomutase 1	2	1	0.248049	0.765118	249510	172441	198730	272664	171421	318782	342417	T	6	1	0.532277	-0.386246	29756.1	TVGHSVVSPQDTVQR	NGMLNVSPIGR	0.09924	0	10.1507	0
P08249	Mdh2	Mus musculus	Malate dehydrogenase, mitochondrial	17	16	0.248166	0.739802	1.42689e+06	2.45901e+06	2.379e+06	2.03193e+06	3.39532e+06	2217170	3.69549e+06	T	60	1	0.532145	-0.434788	35588.8	LTLYDIAHTPGVAADLSHIETR|AGAGSATLSMAYAGAR|TIIPLISQCTPK|IFGVTTLDIVR|AKVAVLGASGGIGQPLSLLLK|GCDVVVIPAGVPR|EGVVECSFVQSK|FVFSLVDAMNGK|VNVPVIGGHAGK|HGVYNPNKIFGVTTLDIVR|ETECTYFSTPLLLGKK|IQEAGTEVVK|ANTFVAELK|NSPLVSR|ITPFEEK|GYLGPEQLPDCLKGCDVVVIPAGVPR	MIAEAIPELK	0.62426	0	16.1659	0
P20263	Pou5f1	Mus musculus	POU domain, class 5, transcription factor 1	3	3	0.248239	1.11066	429199	436704	364821	337565	333140	397129	411465	T	6	1	0.531758	0.151413	38192.2	VESNSEGTSSEPCADRPNAVKLEK|VEPTPEESQDMK|WSLETMFLK		0.12784	0.00429799	8.20864	0.000357679
P60867	Rps20	Mus musculus	Small ribosomal subunit protein uS10	11	11	0.248939	1.07721	14263430	11773317	13675114	11396136	12689968	12654652	12295135	T	173	1	0.532747	0.107301	13364.3	AFKDTGKTPVEPEVAIHR|LIDLHSPSEIVK|DTGKTPVEPEVAIHR|TPVEPEVAIHR|KTPCGEGSKTWDR|RLIDLHSPSEIVK|AFKDTGK|TWDRFQMR|VCADLIR|IRITLTSR|SLEKVCADLIR		0.56303	0	19.2718	0
E9Q557	Dsp	Mus musculus	Desmoplakin	4	4	0.24934	0.392756	163613	356107	38513.7	580116	658165	119834	269833	T	9	1	0.533082	-1.34829	332706	IEVLEEELR|YIELLTR|IKVLEQDKAR|NLHSEISGKR		0.01249	0.000503778	10.103	5.37324e-05
Q3UMY5	Eml4	Mus musculus	Echinoderm microtubule-associated protein-like 4	3	3	0.249606	1.28147	133352	85249.2	121126	61360.1	84598.3	112008	97702.6	T	3	1	0.533072	0.357798	109958	SHNSWENSDDSR|HYLGHTDCVR|GVYQINR		0.02935	0	9.32596	0
Q6PCM1	Kdm3a	Mus musculus	Lysine-specific demethylase 3A	3	3	0.249745	2.05388	185729	350202	173794	31128.1	119760	231969	164858	T	3	1	0.532952	1.03835	147754	ILDDIFASLVQNK|GQCEQEEEVLR|TIQDGDSDELTIKR		0.02872	0	11.2019	0
Q9R1P3	Psmb2	Mus musculus	Proteasome subunit beta type-2	1	1	0.249867	0.681848	93468.1	78304.5	137110	266872	143399	93220	130293	T	3	1	0.532867	-0.552479	22891.7	VAASNIVQMKDDHDKMFK		0.08955	0.000997009	10.0753	6.65894e-05
Q60692	Psmb6	Mus musculus	Proteasome subunit beta type-6	4	4	0.25059	0.781765	745157	816823	1.14911e+06	1257111	1.49728e+06	808544	1.09219e+06	T	33	1	0.533698	-0.355194	25362.5	LAAIQESGVER|QVLLGDQIPK|TTTGSYIANR|VTDKLTPIHDHIFCCR		0.19748	0	13.3459	0
Q8BH64	Ehd2	Mus musculus	EH domain-containing protein 2	4	3	0.250851	0.887699	468841	376392	468987	445448	579554	466206	482582	T	20	1	0.533831	-0.171857	61135.8	LSDVDRDGMLDDEEFALASHLIEAK|LEGHGLPTNLPR|TVTSSLKELYR	LLPLEEHYR	0.10497	0	14.1741	0
Q6ZPY7	Kdm3b	Mus musculus	Lysine-specific demethylase 3B	2	2	0.251261	1.16405	153701	104855	153991	104249	115398	125617	121099	T	8	1	0.534369	0.219158	191340	ADAAASPVGKR|KKPLFITTDSSK		0.01305	0.000503778	9.17181	4.14662e-05
Q9D819	Ppa1	Mus musculus	Inorganic pyrophosphatase	11	11	0.251355	0.85563	1.68041e+06	2.27097e+06	2.24696e+06	1.99355e+06	2.84316e+06	2321481	2.48861e+06	T	81	1	0.533941	-0.22494	32646.2	VIAINVDDPDAANYKDISDVER|GQYISPFHDVPIYADKDVFHMVVEVPR|YKVPDGKPENEFAFNAEFK|NKDFAVDIIK|YVANLFPYK|AAPFTLEYR|AIVDALPPPCESACSLPTDVDKWFHQQKN|LKPGYLEATVDWFR|STHDYWK|LKPGYLEATVDWFRR|SGFSSEER		0.53633	0	16.3029	0
Q9WTI7	Myo1c	Mus musculus	Unconventional myosin-Ic	21	21	0.251996	1.13455	2.03895e+06	2.47783e+06	1979782	1.71258e+06	1.90181e+06	2284718	1.7479e+06	T	50	1	0.534599	0.18212	121868	LLQSNPVLEAFGNAK|QLLLTPSAVVIVEDAK|LGTEEISPR|GAPVGGHILSYLLEK|DQAVMISGESGAGKTEATKR|YLGLMENLR|IIAKGEELLSPLNLEQAAYAR|DNYPQSVPR|AVASEIFK|VLQSLGSEPIQYAVPVVKYDR|LLGVEGTTLR|NGHLAVVAPR|AKNGHLAVVAPR|GVSFYEVPPHLFAVADTVYR|SAICIQSWWR|HLGYKPEEYK|DLQIYSR|GKKDNYPQSVPR|HLGYKPEEYKMGR|TFTWLVR|KRPETVATQFK		0.22201	0	13.2705	0
Q8K2V6	Ipo11	Mus musculus	Importin-11	4	4	0.252967	1.31061	305074	552034	465265	314594	239320	440195	342898	T	11	1	0.536374	0.390235	112344	VAPHALSEEEKSTLR|TQLLPELQVSHNR|MLALKDPVHTVSLQQFIYEK|VVENALK		0.05641	0	11.1272	0
Q8BNU0	Armc6	Mus musculus	Armadillo repeat-containing protein 6	2	2	0.253688	1.34615	148793	96352.2	139393	99533.1	74594.4	70035.8	147416	T	5	1	0.537536	0.42884	50651.2	SQVFSKPILDLGAEELILQAR|LQEVSAHLVR		0.06624	0	10.2963	0
Q9QY36	Naa10	Mus musculus	N-alpha-acetyltransferase 10	5	3	0.253727	1.07343	1.03317e+06	1.12319e+06	951122	994252	931670	897449	1.03344e+06	T	27	1	0.536973	0.102228	26502.9	AALHLYSNTLNFQISEVEPK|AMIENFNAK|NARPEDLMNMQHCNLLCLPENYQMK	MEEDPDDVPHGHITSLAVKR|YYADGEDAYAMKR	0.37021	0	16.256	0
P27546	Map4	Mus musculus	Microtubule-associated protein 4	17	17	0.2539	1.15029	4.37792e+06	2.9098e+06	3.27801e+06	2.90418e+06	2.90385e+06	3.32588e+06	2.95023e+06	T	76	1	0.536666	0.201996	117357	NADLHSGTELIVDNSMAPASDLALPLETK|DMSPLPESEVTLGKDVVILPETK|VGSLDNVGHLPAGGAVK|AAEVESVKEQLPAK|KTEAATTAGKPEPNAVTK|NTTPTGAAPPAGMTSTR|MDLAPPEDVLLTK|ATSPSTLVSTGPSSR|GMVSLSEIEEALAK|TSPSKPSSAPALKPGPK|AAGSIASAQKPPAGK|GTVQTEEKPREDSQLASMQHK|LATTVSAPDLK|DVKPKPITEAK|TQPTSLPK|TEAATTAGKPEPNAVTK|SPATTLPK		0.22311	0	19.3487	0
Q8BJH1	Zc2hc1a	Mus musculus	Zinc finger C2HC domain-containing protein 1A	6	6	0.255135	1.17912	1.01203e+06	669022	1.04551e+06	725846	802708	807688	693535	T	23	1	0.538962	0.23771	35130.1	ASSVNSPLGNKPQTLSPSHR|AIAAPQAGANTK|TIVGVPTGK|KHEEFIATIR|NSVAGVLTNK|GIEGNSSGHLPK		0.22531	0	13.1375	0
Q6PGC1	Dhx29	Mus musculus	ATP-dependent RNA helicase DHX29	13	13	0.255576	1.17236	1090346	1.62074e+06	1.0779e+06	1.18278e+06	965640	1.08506e+06	1.00862e+06	T	27	1	0.539344	0.229415	153879	SAEAGAVGEAQSK|TSLLTLEDVKQELMK|HRVVVVAGETGSGK|KGPQTLSFQDIALLK|KLQEDGLLADVSHVIVDEVHER|LQEDGLLADVSHVIVDEVHER|KKPAPATEAESALNLNLFEK|YLNLAAR|IIGVINEHKK|VVINNKLEQR|EMETLEDHPIFNPAIK|NFDYTAR|VVVVAGETGSGK		0.10916	0	15.4402	0
Q8BHL8	Psmf1	Mus musculus	Proteasome inhibitor PI31 subunit	2	2	0.2557	1.64725	381722	254367	313518	79368.4	264014	340910	180723	T	6	1	0.539307	0.720055	29645.8	SGIITPIHEQWEK|GGMIVDPLR		0.08118	0.000503778	10.0734	4.14662e-05
Q08297	Rad51	Mus musculus	DNA repair protein RAD51 homolog 1	1	1	0.255707	1.14075	154170	120194	164233	127793	111147	145212	126266	T	1	1	0.538745	0.189982	36947.7	LVPMGFTTATEFHQR		0.04425	0	11.1862	0
Q91ZW3	Smarca5	Mus musculus	SWI/SNF-related matrix-associated actin-dependent regulator of chromatin subfamily A member 5	15	9	0.255865	1.18978	1.21064e+06	1.99241e+06	1.66325e+06	1.15547e+06	1.40039e+06	1.35703e+06	1.44878e+06	T	30	1	0.538621	0.250698	121550	ANRFEYLLK|QNLLSVGDYR|LGFDKENVYDELRQCIR|FITDNTVEER|IGKDEMLQMIR|SVCLIGDKEQR|IYVGLSK|ILMKDIDILNSAGK|LVDQNLNK	LRLDSIVIQQGR|LFELLEKEILYYRK|LLNILMQLR|VLIFSQMTR|IMAQIER|DFNQFIK	0.14748	0	10.2871	0
Q6ZWN5	Rps9	Mus musculus	Small ribosomal subunit protein uS4	28	27	0.256465	1.43273	15995956	36280760	34557140	18111720	12870742	25015496	22175070	T	231	1	0.539513	0.51877	22577.6	KGQGGAGAGDDEEED|SRLDQELKLIGEYGLR|IGVLDEGKMKLDYILGLK|RLFEGNALLRR|QVVNIPSFIVR|RLFEGNALLR|KQVVNIPSFIVR|LDSQKHIDFSLR|ELLTLDEKDPR|IGVLDEGKMK|HIDFSLRSPYGGGRPGR|LFEGNALLR|SRLDQELK|HIDFSLR|LDYILGLK|ELLTLDEKDPRR|RLQTQVFK|LQTQVFKLGLAK|KTYVTPR|IEDFLER|IGVLDEGK|IEDFLERR|VKFTLAK|LFEGNALLRR|LQTQVFK|LIGEYGLR|SPYGGGRPGR	MKLDYILGLK	0.71649	0	16.2636	0
Q9CQW9	Ifitm3	Mus musculus	Interferon-induced transmembrane protein 3	2	1	0.256778	0.897483	492348	632830	553144	571397	628316	579960	709976	T	18	1	0.539605	-0.156043	14944.6	IKEEYEVAEMGAPHGSASVR	TTVINMPR	0.20438	0	10.2166	0
Q9CZ30	Ola1	Mus musculus	Obg-like ATPase 1	2	2	0.25749	0.749077	117389	188723	127352	121923	256208	183750	220597	T	4	1	0.540876	-0.416814	44701.3	IGIVGLPNVGK|LQELSAEER		0.05051	0.000503778	9.13648	4.14662e-05
P54822	Adsl	Mus musculus	Adenylosuccinate lyase	11	11	0.25833	1.21625	2.64794e+06	2.38059e+06	2.1009e+06	1.75224e+06	1.47695e+06	2574533	2149009	T	56	1	0.542274	0.282446	54830.9	IRADAYFSPIHSQLEHLLDPSSFTGR|VLSQQAAAVVKQEGGDNDLIER|SNLNNIDFQMAAEEEKR|VLSQQAAAVVK|AFIITGQTYTR|QEGGDNDLIER|LLANLKEMEEPFEK|FLEEEVRPLLKPYGNEMAVK|ADAYFSPIHSQLEHLLDPSSFTGR|NAFDLLLPK|ADLPTLGFTHFQPAQLTTVGKR		0.29132	0	19.3389	0
Q78XF5	Ostc	Mus musculus	Oligosaccharyltransferase complex subunit OSTC	1	1	0.259208	0.513965	143429	73873.1	37113.1	239789	208468	52276.5	157988	T	5	1	0.543416	-0.960259	16803.8	VPFLVLECPNLK		0.08054	0	13.2473	0
P59328	Wdhd1	Mus musculus	WD repeat and HMG-box DNA-binding protein 1	15	15	0.259495	1.15412	2.83891e+06	2.22742e+06	2349750	2.05179e+06	1.72621e+06	2.39114e+06	2.43111e+06	T	43	1	0.543246	0.206788	124176	SQVEDAEDREDTVSEEKPESHNHGQNLFQSANSSDTPALK|VVDVMDNSQQQTFR|VVVSSKEPAVSANSTR|SDHYWVVGIHENPQQLR|FTTNANHVVFNGAGNK|IAAGSSDFLVK|SQILSDNPDISDETDIIKEGMIR|SKQASAASYFQK|SPVIKPLTPKPR|LNAGYSHTTTEWSRPR|SANILDSMNK|KLILAQK|ALNLPANQK|LSELAAEK|GLGNTWTPVCNIR		0.20054	0	15.3721	0
Q9D172	Gatd3	Mus musculus	Glutamine amidotransferase-like class 1 domain-containing protein 3, mitochondrial	3	3	0.260103	0.788729	232242	116015	185827	199130	240779	242847	190086	T	5	1	0.544079	-0.342398	28072.8	NVLAESAR|KPIGLCCIAPVLAAK|NVLELTGK		0.11654	0.00791066	9.05898	0.000700327
P62141	Ppp1cb	Mus musculus	Serine/threonine-protein phosphatase PP1-beta catalytic subunit	5	2	0.261206	1.31936	399147	703312	448550	328965	276761	501507	456185	T	12	1	0.54576	0.399835	37162.6	IVQMTEAEVR|YQYGGLNSGRPVTPPR	AHQVVEDGYEFFAKR|IFCCHGGLSPDLQSMEQIRR|AHQVVEDGYEFFAK	0.18654	0	16.1685	0
Q9EST4	Psmg2	Mus musculus	Proteasome assembly chaperone 2	2	2	0.262325	1.14011	249945	276310	207152	254586	202125	212024	188403	T	4	1	0.547455	0.189168	29505	SLNWLEMEK|YLLTPCLQK		0.06818	0	9.13784	0
Q8C1B7	Septin11	Mus musculus	Septin-11	8	6	0.262705	0.904066	1.05668e+06	1244553	1.44506e+06	1.41956e+06	1.40415e+06	1.2874e+06	1.37313e+06	T	44	1	0.548074	-0.145501	49663.3	AAAQLLQSQAQQSGAQQTK|AAAQLLQSQAQQSGAQQTKK|AVAVGRPSNEELR|SYELQESNVR|KKELEEEVSNFQK|STLMDTLFNTKFESDPATHNEPGVR	SLDLVTMK|VNMEDLR	0.22274	0	16.2289	0
P13439	Umps	Mus musculus	Uridine 5'-monophosphate synthase	22	22	0.263702	1.15766	3.07538e+06	4541509	3394705	2.8766e+06	2.85264e+06	3.55084e+06	3.27907e+06	T	94	1	0.550303	0.211214	52259.3	VSMKPEFLHLTPGVQLETGGDHLGQQYNSPQEVIGKR|IASWADIVNAHVVPGSGVVK|VSMKPEFLHLTPGVQLETGGDHLGQQYNSPQEVIGK|SGLSSPVYIDLR|RHEFLIFEDR|KFADIGNTVK|KAAWEAYLSR|GSDVIIVGR|AELPGTHPLASK|AAWEAYLSR|GLQEVGLPLHR|VTDAIVLLDR|KFADIGNTVKK|FADIGNTVK|GILAAANRLEAAEMYR|LEAAEMYR|GILAAANRLEAAEMYRK|RGSDVIIVGR|FIQENVFSAANHNGLPPPEKK|QYESGTFK|ELSFGAR|LQAQGIR		0.41788	0	17.3169	0
P0DP26|P0DP27|P0DP28	Calm1|Calm2|Calm3	Mus musculus	Calmodulin-1|Calmodulin-2|Calmodulin-3	2	0	0.264456	0.73444	258694	504064	584692	505461	614856	470053	760618	T	10	3	0.551263	-0.445284	16826.8		EAFSLFDKDGDGTITTK|VFDKDGNGYISAAELR	0.22148|0.22148|0.22148	0	13.1127	0
Q86YZ3	HRNR	Homo sapiens	Hornerin	11	5	0.264584	0.504226	358795	1.00764e+06	213777	1.07371e+06	1.90923e+06	553681	448725	C	32	1	0.550874	-0.987858	282228	GSGSGQSPSSGQHGTGFGR|HGSGSGQSSSYGPYGSGSGWSSSR|SSSRGPYESGSGHSSGLGHQESR|GPYESGSGHSSGLGHQESR|QSSSYGPHGYGSGR	HGSGSGHSSSYGQHGSGSGWSSSSGR|GPYESGSGHSSGLGHR|HGSGSGQSSSYSPYGSGSGWSSSR|SSSRGPYESR|GRHGSGSGHSSSYGQHGSGSGWSSSSGR|QSPSYGR	0.11509	0	22.3117	0
P08779	KRT16	Homo sapiens	Keratin, type I cytoskeletal 16	29	10	0.264617	0.713978	2.0222e+06	2335633	1.61701e+06	4.39957e+06	3.50888e+06	1.74453e+06	2149100	C	243	1	0.550444	-0.486049	51236.2	TEELNKEVASNSELVQSSR|NKIIAATIENAQPILQIDNAR|TDLEMQIEGLKEELAYLRK|IIAATIENAQPILQIDNAR|APSTYGGGLSVSSR|LLEGEDAHLSSQQASGQSYSSR|TKYEHELALR|QRPSEIKDYSPYFK|QTVEADVNGLRR|DAETWFLSK	TRLEQEIATYRR|VTMQNLNDRLASYLDKVR|ALEEANADLEVK|ISSVLAGGSCR|TRLEQEIATYR|ASLENSLEETKGR|LEQEIATYR|LASYLDKVR|VLDELTLAR|GSCGIGGGIGGGSSR|VTMQNLNDR|IRDWYQR|VTMQNLNDRLASYLDK|LAADDFR|QFTSSSSMK|ILNEMRDQYEQMAEK|LASYLDK|KNHEEEMLALR|LEQEIATYRR	0.58774	0	18.4938	0
O54734	Ddost	Mus musculus	Dolichyl-diphosphooligosaccharide--protein glycosyltransferase 48 kDa subunit	7	7	0.265817	0.864625	1.59571e+06	1.99752e+06	1.67548e+06	1.80702e+06	2588201	1986662	1.7977e+06	T	47	1	0.552517	-0.209854	48997	TLVLLDNLNVR|TADDPSLSLIK|NTLLIAGLQAR|SSLNPILFR|DTHSLFFR|GFELTFK|WVFKEEGVLR		0.15193	0	14.3707	0
O55201	Supt5h	Mus musculus	Transcription elongation factor SPT5	2	2	0.265932	0.801144	145948	119959	99159.8	146562	205996	151671	110611	T	5	1	0.552127	-0.319867	120589	HLVLAGGSKPR|TPHYGSQTPLHDGSR		0.02403	0.000503778	9.13767	4.14662e-05
Q9Z127	Slc7a5	Mus musculus	Large neutral amino acids transporter small subunit 1	4	3	0.266135	0.930903	750139	645869	695918	731990	711041	835444	718662	T	19	1	0.55198	-0.103298	55835.5	RGDGADPEGEGVTLQR|AVATPAAAAAEEER|AVATPAAAAAEEERQAR	LFFVGSR	0.07813	0	17.3426	0
O55022	Pgrmc1	Mus musculus	Membrane-associated progesterone receptor component 1	2	2	0.266663	0.862482	178852	152217	161482	219168	209239	144256	196740	T	6	1	0.552507	-0.213434	21680.8	DFTPAELR|ILMAINGK		0.08205	0.00475964	9.10748	0.000390288
Q61846	Melk	Mus musculus	Maternal embryonic leucine zipper kinase	2	2	0.266672	1.2773	115136	129971	97549	76877.9	71276.5	140330	80904.7	T	5	1	0.551971	0.353096	72682.3	LVNPDQLLSEIMAILPK|LMDKENVCTPK		0.04355	0	11.4267	0
A2A432	Cul4b	Mus musculus	Cullin-4B	19	15	0.266734	1.12436	2.02111e+06	2.56795e+06	1.97869e+06	1.95416e+06	1.82798e+06	2.23149e+06	1752193	T	41	1	0.551494	0.16911	110630	LEEEADRLITYLDQTTQK|AQIHQFREDSLDSVLFLK|SSTAVSSFANSKPGSAK|SILISSVASVHHANGLAK|FEDTLEFVGIDTK|GKDIEDGDKFICNDDFK|SSTAVSSFANSKPGSAKK|ETVEEQASTTER|LYAAEGQK|FIYGKDVFEAFYKK|EVPEYLHHVNKR|LRFEDTLEFVGIDTK|AHIISDQKVQTK|TIDGILLLIERER|SLIASVEK	TLQSLACGK|QYQIDAAIVR|QLLGEHLTAILQK|LKHECGAAFTSK	0.23402	0	15.2037	0
P83887|Q8VCK3	Tubg1|Tubg2	Mus musculus	Tubulin gamma-1 chain|Tubulin gamma-2 chain	3	0	0.267281	1.15821	381875	504482	481685	430499	341184	463664	342819	T	17	2	0.552159	0.211891	51068.72597101928|51089.734167457864		VIHSILNSSYAK|AVLLDLEPR|KSPYLPSAHR	0.06874|0.06874	0	10.1012	0
Q3TXS7	Psmd1	Mus musculus	26S proteasome non-ATPase regulatory subunit 1	20	20	0.267602	1.06175	4.4127e+06	4816101	4.42515e+06	4.56845e+06	4182808	3.91998e+06	4492487	T	98	1	0.552183	0.0864493	105663	TPEQCPSVVSLLSESYNPHVR|FGAILAQGILDAGGHNVTISLQSR|QCVENADLPEGEKKPIDQR|NAQAIEDMVGYAQETQHEK|VSTAVLSITAK|QAIGIALETR|LLHVAVSDVNDDVRR|YQPFKPLSIGGIIILK|SNCKPSTFAYPAPLEVPKEK|VLSMTETCR|VINDKHDDVMAK|NNNTDLMILK|DTSEDVEELVEPVAAHGPK|EALQLMATYLPK|QFAALVASK|QDVYDLLK|RLDVFEK|TASAVAGKTPDASPEPKDQTLK|VMPAQLK|RLLHVAVSDVNDDVRR		0.28437	0	19.3005	0
Q8CI94	Pygb	Mus musculus	Glycogen phosphorylase, brain form	9	8	0.267792	1.20736	539188	869714	544553	591411	440996	534381	547034	T	18	1	0.551984	0.27186	96668.5	LLSLVDDEAFIRDVAK|IGEGFLTDLSQLKK|HLEIIYAINQR|GIAGLGDVAEVRK|QSVFKDFYELEPEKFQNK|FSAQLEKEYK|TCFETFPDKVAIQLNDTHPALSIPELMR|EFYERLPELR	VIFLENYR	0.15184	0	14.1908	0
Q8C052	Map1s	Mus musculus	Microtubule-associated protein 1S	10	10	0.268182	1.12755	1.19545e+06	1.32821e+06	1.35383e+06	937463	1.2218e+06	1.34427e+06	1.11473e+06	T	36	1	0.55222	0.173191	102875	HSATFSSIVK|ARQPLNTTNPSR|LRGGEDEAVCAR|SLGIAPLPLQR|KEPVRGTVGSIANR|RLLSPALGVVFLNAR|RPVVTTHDLEAPSR|WYEETHAQHQALGIR|LLDGLQR|SEPADRPGRVPLTR		0.12744	0	15.1972	0
Q9QZQ1	Afdn	Mus musculus	Afadin	3	3	0.268466	1.18109	176272	182687	203560	139648	124457	191903	189019	T	5	1	0.552093	0.240123	206371	LDSDRVSSASSTAER|LQFGTSHVFK|IYADSLKPNIPYK		0.02088	0.000503778	9.09895	4.14662e-05
Q61823	Pdcd4	Mus musculus	Programmed cell death protein 4	1	1	0.268689	1.24244	46055.6	48405.1	52146.5	27738.5	44325.3	54520.3	35519.7	T	2	1	0.552016	0.313177	51670	DSGRGDSVSDNGSEAVR		0.03625	0.00196464	8.30586	7.70852e-05
Q4FZF3	Ddx49	Mus musculus	Probable ATP-dependent RNA helicase DDX49	2	2	0.268697	1.52377	131100	156160	240960	57023	107680	194840	130202	T	9	1	0.551481	0.607646	54059.7	KPHVVIATPGR|SRPQEPAQAEAQD		0.05	0	12.1558	0
Q9D0L7	Armc10	Mus musculus	Armadillo repeat-containing protein 10	3	3	0.268969	1.16936	278388	393228	247869	234841	244376	274232	277088	T	6	1	0.551696	0.225713	33289.6	LLYLLESTDDPVITEK|LANQIPFAK|INSLNQSIKEK		0.11765	0	15.1472	0
Q80UG5	Septin9	Mus musculus	Septin-9	21	21	0.269339	1.12806	3672222	3.42984e+06	3.4903e+06	2.64542e+06	2980045	3.89189e+06	3.12286e+06	T	87	1	0.552133	0.173838	65533.9	RTEITIVKPQESVLR|SITHDIEEK|QVESTASAAGPSR|KSVQPTSEERIPK|ITADLLSNGIDVYPQKEFDEDAEDRLVNEK|YLQEEVNINR|VVNIVPVIAK|LEPRPSVAEVPYR|LVDSLSQR|ADTLTLEER|FINDQYEK|FINDQYEKYLQEEVNINR|SVQPTSEERIPK|RAEVLGHKTPEPVPR|FQDLGVK|MKLTVIDTPGFGDHINNENCWQPIMK|STLINTLFK|TPEPVPR|LTVIDTPGFGDHINNENCWQPIMK|RVQTPLLR|DITSNIHFEAYR		0.36878	0	15.1725	0
Q07832	Plk1	Mus musculus	Serine/threonine-protein kinase PLK1	7	7	0.269758	1.21525	1.06419e+06	1.16927e+06	952918	828488	646012	1.19028e+06	903256	T	13	1	0.552545	0.281256	68257.6	HINPVAASLIQK|FSIAPSSLDPSSR|CFEISDADTKEVFAGK|EIPEVLVDPR|ITLLNYFR|GVENPLPDRPR|VEYEGER		0.12769	0	12.2278	0
P49817	Cav1	Mus musculus	Caveolin-1	1	1	0.270134	0.716824	89931.6	178042	81887.2	184164	208873	119794	117950	T	5	1	0.552646	-0.48031	20525.5	AMADEVTEK		0.05056	0.00656353	8.05737	0.000619272
Q9D0B0	Srsf9	Mus musculus	Serine/arginine-rich splicing factor 9	7	6	0.270723	1.94004	587267	461964	475686	70473	510028	425615	300937	T	12	1	0.55344	0.956087	25645.4	FEDPRDAEDAIYGR|HGLVPFAFVR|SHEGETSYIR|KEDMEYALR|IYVGNLPSDVREKDLEDLFYK|EKDLEDLFYK	LRVEFPR	0.31982	0	10.1898	0
Q921I9	Exosc4	Mus musculus	Exosome complex component RRP41	4	4	0.270725	1.18356	700341	708938	1.03304e+06	707139	547846	751859	718329	T	26	1	0.552882	0.24313	26233.3	LHEDHLEQVLEAAAQAAR|GVHTLLDLVVR|ALAVVYGPHEIR|AGLELLSDQGYR		0.21633	0	19.307	0
Q8CD15	Riox2	Mus musculus	Ribosomal oxygenase 2	4	4	0.271014	1.13853	379165	408122	372390	287489	297954	404846	381984	T	7	1	0.553131	0.187176	53483.4	VQPTGDENEEASVPCKR|ATIQFHQPQR|AHFLQLR|KLSGFLR		0.08817	0	9.3263	0
Q6P1F6	Ppp2r2a	Mus musculus	Serine/threonine-protein phosphatase 2A 55 kDa regulatory subunit B alpha isoform	13	8	0.271328	1.07584	3.08223e+06	3.68017e+06	3.54172e+06	3.12085e+06	2941178	3421193	3270589	T	64	1	0.553339	0.10547	51659.5	VPVFRPMDLMVEASPR|VVIFQQEQENKIQSHSR|IWDLNMENRPVETYQVHEYLR|VVIFQQEQENK|YRDPTTVTTLR|NAAQFLLSTNDKTIK|DITLEASRENNKPR|NAAQFLLSTNDK	GEYNVYSTFQSHEPEFDYLK|INLWHLEITDR|LFEEPEDPSNR|SFFSEIISSISDVK|SLEIEEK	0.35123	0	17.2887	0
Q99MN1	Kars1	Mus musculus	Lysine--tRNA ligase	19	18	0.271409	1.13484	3.27875e+06	4.61256e+06	4.47807e+06	3.20489e+06	3.67956e+06	3.68909e+06	3825847	T	85	1	0.553004	0.182483	67796.5	ATLQESEVKVDGEQK|LPETSLFETEETRK|ALGVKLPETSLFETEETRK|ITYHPDGPEGQAYEVDFTPPFRR|NYKSEEEFVHINNK|ILDDICVAK|RGDIIGVEGNPGKTK|RGDIIGVEGNPGK|LQVMANSR|ISMVEELEK|MLVVGGIDRVYEIGR|LIFYDLR|MLSGMVK|IAPELYHK|QLFEEQAK|SITGSYK|VTGEDPYPHKFHVDISLTQFIQEYSHLQPGDHLTDVTLK|NYKSEEEFVHINNKLR	MLVVGGIDR	0.34454	0	16.3524	0
Q9CWK3	Cd2bp2	Mus musculus	CD2 antigen cytoplasmic tail-binding protein 2	1	1	0.271547	0.842266	89424.3	62986.3	52888.4	72751.5	89250.9	76823.3	79250.9	T	3	1	0.552754	-0.247652	37671.1	LVDPVAAAGGPGSR		0.04094	0	11.1007	0
P61327|Q9CQL1	Magoh|Magohb	Mus musculus	Protein mago nashi homolog|Protein mago nashi homolog 2	2	0	0.272061	0.531433	45218.1	282885	223520	171919	310121	315069	302873	T	2	2	0.553375	-0.91204	17152.786361800627|17080.76523243257		GKFGHEFLEFEFRPDGK|IIDDSEITKEDDALWPPPDR	0.25342|0.25342	0	10.1364	0
Q9CR68	Uqcrfs1	Mus musculus	Cytochrome b-c1 complex subunit Rieske, mitochondrial	5	5	0.272264	0.936725	538582	624614	564407	610356	664190	566892	616760	T	7	1	0.553029	-0.0943019	29349.2	EIDQEAAVEVSQLRDPQHDLDR|SGPFAPVLSATSR|SHTDVKVPDFSDYRR|SHTDVKVPDFSDYR|GVAGALRPLLQGAVPAASEPPVLDVK		0.27737	0	12.1105	0
Q9CZW4	Acsl3	Mus musculus	Fatty acid CoA ligase Acsl3	1	1	0.272452	0.664692	86575.9	28940.7	63858	80305.5	91970.9	53343.4	112946	T	1	1	0.552812	-0.589242	80440.5	THYQADIER		0.0125	0.0087116	8.11532	0.000734802
Q9ERF3	Skic8	Mus musculus	Superkiller complex protein 8	3	3	0.273446	1.71196	253174	318604	415724	65539.1	236380	300084	270795	T	5	1	0.554254	0.775647	33751.8	TNQYSILFK|LWDLENGK|VWDVGTR		0.07869	0.00475964	9.07695	0.000379806
Q99K43	Prc1	Mus musculus	Protein regulator of cytokinesis 1	3	3	0.274369	0.867173	223147	340057	244912	324448	301957	275274	322794	T	8	1	0.555325	-0.205609	70246.2	GGNLLKEEKER|LQIPEEEREPVEAIMTGSK|LFLEFER		0.06136	0	11.1602	0
Q921I2	Klhdc4	Mus musculus	Kelch domain-containing protein 4	8	8	0.274517	0.869254	1.37049e+06	1.22491e+06	1.32748e+06	1.68744e+06	1.82945e+06	1.34409e+06	1.22871e+06	T	23	1	0.554995	-0.20215	64820	SRKEEEDLEALIAHFQTLDAK|QVLTPSGLGVQPSPK|SNAMLAVK|GEQFEEYLSR|KTQVTETPCPPPSPR|INPSGVKPTAR|TLVEMDPK|DLWVLHLATK		0.16781	0	18.2081	0
O70435	Psma3	Mus musculus	Proteasome subunit alpha type-3	3	3	0.275225	0.855853	573557	466225	625861	723154	723085	498765	659106	T	15	1	0.555255	-0.224565	28387.1	AVENSSTAIGIR|DIREEAEKYAK|VFQVEYAMK		0.12549	0	13.2439	0
Q9D903	Ebna1bp2	Mus musculus	Probable rRNA-processing protein EBP2	6	6	0.276074	1.20732	769823	426918	671712	509120	474268	545799	476501	T	25	1	0.556426	0.271803	34681.2	GFSDKLDFLEGDQKPVER|QAQAAVLAVLPR|KVQTEVLQKR|GLLKPGLNVVLEKPK|KGVNPEDDFQR|ESYDDVSSFR		0.24837	0	17.2171	0
Q9CR67	Tmem33	Mus musculus	Transmembrane protein 33	4	4	0.276326	0.680807	223819	518900	511923	922539	400590	602545	485076	T	13	1	0.556334	-0.554682	28012.8	ALLANALTSALR|GSNSLPLLR|LCLQSIAFISR|NLFNELR		0.15789	0	15.2538	0
O54724	Cavin1	Mus musculus	Caveolae-associated protein 1	6	6	0.277206	0.809162	1.32958e+06	999105	1.57408e+06	1.79304e+06	2.03634e+06	1331932	1.28255e+06	T	51	1	0.557291	-0.3055	43927	KLEVNEAELLR|VMIYQDEVKLPAK|SFTPDHVVYAR|IREGEVEVLK|KSFTPDHVVYAR|EGEVEVLK		0.11735	0	14.2793	0
P42209	Septin1	Mus musculus	Septin-1	7	7	0.277667	1.12098	541293	705292	642552	530029	493714	644152	576931	T	13	1	0.557667	0.164761	41993.3	GLRPLDVAFLR|FIEEQFEQYLRDESGLNRK|VNIIPVIGK|RGVEIEEGGIKVK|ADALMPR|MQEMLEK|CLQSLARPGAR		0.21038	0	11.4217	0
Q61316	Hspa4	Mus musculus	Heat shock 70 kDa protein 4	31	27	0.278025	0.858291	5387609	5309867	6805325	5.95935e+06	8.22788e+06	5661843	7489526	T	156	1	0.55805	-0.220461	94073.3	NKEDQYEHLDAADVTKVEK|VLATAFDTTLGGR|LMNETTAVALAYGIYKQDLPALEEKPR|SVMDATQIAGLNCLR|AGGIETIANEYSDR|ELSTTLNADEAVTR|NAVEEYVYEMR|FLEMCDDLLAR|QSLTVDPVVK|VTYMEEERNFTTEQVTAMLLSK|STNEAMEWMNSK|GKFLEMCDDLLAR|CTPACVSFGPK|AFSDPFVEAEK|NKEDQYEHLDAADVTK|DKLSGEYEK|FQESEERPKLFEELGK|HAEQNGPVDGQGDNPGSQAAEHGADTAVPSDGDKKLPEMDID|VREFSITDVVPYPISLR|KFDEVLVNHFCEEFGKK|LKKEDIYAVEIVGGATR|QVYVDKLAELK|LFEELGK|QIQQYMK|FVSEDDRNTFTLK…	GCALQCAILSPAFK|MIMQDKLEKER|MIMQDKLEK|NHAAPFSK	0.46373	0	17.1363	0
O35345	Kpna6	Mus musculus	Importin subunit alpha-7	5	3	0.279189	1.15852	657178	498991	478244	498401	372423	499085	506795	T	17	1	0.560178	0.21228	59926.4	SGSGVNPYCGLIEEAYGLDKIEFLQSHENQEIYQK|NNALNPEEMR|NNALNPEEMRR	IVQVALNGLENILR|NAVWALSNLCR	0.13246	0	13.3478	0
Q8CI12	Smtnl2	Mus musculus	Smoothelin-like protein 2	3	3	0.27951	1.18451	285354	199157	230163	163004	194425	254600	194023	T	7	1	0.560336	0.244291	49492.8	ALHEDMQGLQR|MPHQPVTAVTR|TVAELQR		0.0636	0	10.1547	0
P83940	Eloc	Mus musculus	Elongin-C	4	4	0.279703	0.831	334780	499987	406535	474737	648257	402674	470107	T	23	1	0.560036	-0.267079	12465	LISSDGHEFIVKR|EHALTSGTIK|AMLSGPGQFAENETNEVNFR|VCMYFTYK		0.45536	0	11.1647	0
Q9CYA6	Zcchc8	Mus musculus	Zinc finger CCHC domain-containing protein 8	4	4	0.279796	1.20327	717682	442227	510988	551308	379436	474863	424718	T	15	1	0.559637	0.266957	77976.8	FKPGVISEELQDALGVTDK|YHAEEVEER|LVNYPGFNISTPR|NVTYDLSK		0.06911	0	13.1096	0
Q91WN1	Dnajc9	Mus musculus	DnaJ homolog subfamily C member 9	3	3	0.279938	1.26477	637810	397731	657196	350822	481117	576773	368333	T	10	1	0.559266	0.338879	30040.3	ISLEDIQAFEK|VYAVLSDKEQK|EIPAYSAFVK		0.12355	0	11.2695	0
E9Q912	Rap1gds1	Mus musculus	Rap1 GTPase-GDP dissociation stimulator 1	1	1	0.280467	0.623193	31893.4	55233.5	17927.4	93573.3	46117.6	51909.3	29544.3	T	1	1	0.559846	-0.682249	66034.3	LMDLLDRHVEDGNVTVQHAALSALR		0.04119	0.00827586	8.07082	0.000700327
P04745	AMY1A	Homo sapiens	Alpha-amylase 1	21	14	0.28072	0.170132	766217	1.04027e+06	40241.5	16204060	6.40719e+06	343597	340990	C	43	1	0.56002	-2.55527	57730.9	YFENGKDVNDWVGPPNDNGVTK|GFGGVQVSPPNENVAIHNPFRPWWER|NVVDGQPFTNWYDNGSNQVAFGR|EVTINPDTTCGNDWVCEHR|TGSGDIENYNDATQVR|IAEYMNHLIDIGVAGFR|LSGLLDLALGKDYVR|DFPAVPYSGWDFNDGK|SGNEDEFRNMVTR|DFPAVPYSGWDFNDGKCK|CKTGSGDIENYNDATQVR|IYVSDDGK|YFENGKDVNDWVGPPNDNGVTKEVTINPDTTCGNDWVCEHR|SSDYFGNGR	GHGAGGASILTFWDAR|ALVFVDNHDNQR|NWGEGWGFMPSDR|TSIVHLFEWR|HMWPGDIK|YQPVSYK|MAVGFMLAHPYGFTR	0.5225	0	16.2923	0
Q3THS6	Mat2a	Mus musculus	S-adenosylmethionine synthase isoform type-2	12	11	0.281295	0.862267	2591889	3.47049e+06	3.34413e+06	4.1166e+06	4.17755e+06	3.08249e+06	3.19245e+06	T	97	1	0.560496	-0.213793	43661.4	FVIGGPQGDAGLTGR|YLDEDTIYHLQPSGR|TGMILLAGEITSR|FVIGGPQGDAGLTGRK|TQVTVQYMQDR|DLDLKKPIYQR|TAAYGHFGR|HIGYDDSSKGFDYK|DSFPWEVPKK|NGTLPWLRPDSK|AAIDYQK	NFDLRPGVIVR	0.32658	0	16.3589	0
Q5SUR0	Pfas	Mus musculus	Phosphoribosylformylglycinamidine synthase	13	13	0.281514	1.10549	2.20905e+06	1.89775e+06	1.88919e+06	1.55084e+06	2.07252e+06	1.85797e+06	1.77e+06	T	41	1	0.560263	0.144683	144538	CPACFVGTITGDKR|FLRPEDSTRPSCFQQQQGLR|LGGTALAQCFSQLGEHPPDLDLPENLVR|AVVVEEPVGELR|NPSTVEVFDLAQSNSEHSR|IVLVDDRECLVGK|CLELGHTGEAGPQAMAR|HLALMPHPER|FCDNSSAIQGK|LSFTDHPTAEMEAISLAALHDR|AFHITQGLLK|VEPGPALMLR|EWIKPIMFSGGIGSMEAK		0.15258	0	16.2865	0
P50516	Atp6v1a	Mus musculus	V-type proton ATPase catalytic subunit A	7	7	0.281876	0.923433	1.18854e+06	1.17026e+06	1.28549e+06	1.16521e+06	1.33411e+06	1.28212e+06	1.49739e+06	T	33	1	0.560805	-0.114921	68282.6	VGSHITGGDIYGIVNENSLIK|TALVANTSNMPVAAR|QVRPVTEKLPANHPLLTGQR|VGHSELVGEIIR|GVNVSALSR|TVISQSLSK|FSMVQVWPVR		0.15559	0	14.2551	0
P11087	Col1a1	Mus musculus	Collagen alpha-1(I) chain	2	2	0.282719	0.659328	226547	211757	92830.3	217512	301635	149142	396227	T	2	1	0.562004	-0.600932	137948	NGDRGETGPAGPAGPIGPAGAR|GVQGPPGPAGPR		0.0234	0	15.3798	0
Q91V92	Acly	Mus musculus	ATP-citrate synthase	50	49	0.283446	1.20936	13114461	22956938	15922235	15229054	11501483	15239466	14155749	T	361	1	0.563087	0.274249	119651	TTDGVYEGVAIGGDRYPGSTFMDHVLR|TIAIIAEGIPEALTR|AGKDLVSSLTSGLLTIGDR|SFDELGEIIQSVYEDLVAK|IGNTGGMLDNILASK|AIRDYQGPLKEHEVTIFVR|SGGMSNELNNIISR|GKLGLVGVNLSLDGVK|GVTIIGPATVGGIKPGCFK|HPWDDISYVLPEHMSM|LGLVGVNLSLDGVK|SAYDSTMETMNYAQIR|EAYPEEAYIADLDAK|QHFPATPLLDYALEVEK|LLVGVDEKLNTEDIKR|KHPEVDVLINFASLR|LYRPGSVAYVSR|AFDSGIIPMEFVNK|GAIVPAQEVPPPTVPMDYSWAR|DYQGPLKEHEVTIFVR|TTGIPIHVFGTETHMTAIVGMALGHRPIPNQPPTAAHTANFLL…	TASFSESRADEVAPAKK	0.57012	0	20.2195	0
Q9D8U0	Ifrd2	Mus musculus	Interferon-related developmental regulator 2	1	1	0.283861	1.45707	45299.4	123927	57200.1	43194.2	31421.1	60946.9	58977.3	T	2	1	0.563366	0.543071	47686.7	LLPDFLLER		0.02041	0.00196464	8.21422	0.000101847
D3YXK2	Safb	Mus musculus	Scaffold attachment factor B1	2	2	0.283919	0.762988	244493	110916	182501	192360	260659	268628	184767	T	8	1	0.562956	-0.390268	105040	NFWVSGLSSTTR|GVPVISVK		0.02134	0	11.1837	0
Q64213	Sf1	Mus musculus	Splicing factor 1	8	8	0.284347	0.894109	1.14883e+06	1.09801e+06	1.22255e+06	1.15458e+06	1.51412e+06	1.42753e+06	1.11715e+06	T	25	1	0.563246	-0.161477	70358.1	AYIVQLQIEDLTR|QGIETPEDQNDLRK|ILRPWQSSETR|FQRPGDPQSAQDKAR|SITNTTVCTK|DGQMLPGEDEPLHALVTANTMENVKK|LNGTLREDDNR|SRWNQDTMEQK		0.16998	0	13.3721	0
P24860	Ccnb1	Mus musculus	G2/mitotic-specific cyclin-B1	7	7	0.284831	1.19289	765505	861834	489977	573075	543595	618662	568495	T	26	1	0.563594	0.254457	48020.8	TALGDIGNKVSEELQAR|VGEVDVEQHTLAK|ISTLAQLNCTLVQNLSK|VLNFSLGRPLPLHFLR|NVVMVNCGLTK|TALGDIGNK|VSEELQAR		0.17209	0	20.2851	0
Q9DCT2	Ndufs3	Mus musculus	NADH dehydrogenase [ubiquinone] iron-sulfur protein 3, mitochondrial	2	2	0.284914	0.821159	233710	407345	310292	332558	421155	443412	323384	T	7	1	0.563205	-0.284266	30130.5	VVAEPVELAQEFR|DFPLTGYVELR		0.09125	0	13.3671	0
Q9CXW4	Rpl11	Mus musculus	Large ribosomal subunit protein uL5	14	13	0.285044	1.05716	10438731	9085913	10119841	8710448	9539007	9822191	9288478	T	141	1	0.562898	0.0801886	20239.6	AQDQGEKENPMR|VLEQLTGQTPVFSK|KLCLNICVGESGDRLTR|GAKAEEILEK|LCLNICVGESGDRLTR|KLCLNICVGESGDR|LCLNICVGESGDR|WFQQKYDGIILPGK|YDGIILPGK|VREYELR|ISKEEAMR|HRISKEEAMR|IAVHCTVR	AQDQGEKENPMRELR	0.53371	0	19.3984	0
Q99JH1	Rpp25l	Mus musculus	Ribonuclease P protein subunit p25-like protein	2	2	0.285432	2.04664	188147	130867	97939.8	173746	39472.6	124804	21533.4	T	3	1	0.563136	1.03326	17664.3	NLLGLALGR|HVVFSGSGR		0.11043	0.00196464	8.26355	7.70852e-05
P09242	Alpl	Mus musculus	Alkaline phosphatase, tissue-nonspecific isozyme	5	5	0.285624	1.23782	533239	621827	368928	339053	333889	452991	504412	T	23	1	0.562869	0.307803	57477.8	GTRLDGLDLISIWK|ANEGTVGVSAATER|GNSIFGLAPMVSDTDKKPFTAILYGNGPGYK|SVGIVTTTR|GQLHHNTGEETRLEMDKFPFVALSK		0.17748	0	13.3636	0
Q9D1C9	Rrp7a	Mus musculus	Ribosomal RNA-processing protein 7 homolog A	1	1	0.285837	0.800923	266694	146099	256941	318826	289205	226350	251241	T	8	1	0.562559	-0.320265	32378.8	TVELQEKPDLAESPTEPK		0.06429	0	18.2814	0
Q61029	Tmpo	Mus musculus	Lamina-associated polypeptide 2, isoforms beta/delta/epsilon/gamma	18	8	0.285996	1.04666	2.65352e+06	2.5157e+06	2458728	2.40924e+06	2381069	2628523	2.30497e+06	T	116	1	0.562475	0.0657956	50342.1	HASSILPITEFSDITR|IDGAVISESTPIAETIK|GAAGRPLELSDFR|ASSNESLVANR|YAPLADVK|YAPLADVKSEK|HASSILPITEFSDITRR|MEESFSSK	LEDKDDLDVTELSNEELLDQLVR|PEFLEDPSVLTK|SSTPLPTVSSSAENTR|LKSELVANNVTLPAGEQRK|SELVANNVTLPAGEQRK|DVYVQLYLQHLTAR|PEFLEDPSVLTKDK|GPPDFSSDEEREPTPVLGSGASVGR|NRPPLAAGANSK|YGVNPGPIVGTTR	0.47124	0	22.4435	0
P46061	Rangap1	Mus musculus	Ran GTPase-activating protein 1	15	15	0.28626	1.09551	4738242	3.74666e+06	3.71208e+06	4.01164e+06	3.59147e+06	3.46141e+06	3.70558e+06	T	106	1	0.562554	0.131605	63491.4	SPACFTLQELK|QVEVINFGDCLVR|ASEDIAKLAETLAK|VINLNDNTFTEK|LNNCGMGIGGGK|SKGAVAIADAVR|ILAAALTECHRK|LKELNLSFCEIKR|TQVAGGQLSFK|HNLLQTLYNI|GGVAMAETLK|ILAAALTECHR|ELNLSFCEIKR|GAVAIADAVR|GFEALLK		0.2326	0	15.2384	0
Q9CWF2	Tubb2b	Mus musculus	Tubulin beta-2B chain	32	2	0.286573	1.34952	3.23282e+06	1655606	3.03548e+06	1445639	1.45906e+06	2.5562e+06	2300975	T	725	1	0.562796	0.432446	49920.9	INVYYNEATGNKYVPR|INVYYNEATGNK	SGPFGQIFRPDNFVFGQSGAGNNWAK|GHYTEGAELVDSVLDVVR|GHYTEGAELVDSVLDVVRK|MSMKEVDEQMLNVQNKNSSYFVEWIPNNVK|FWEVISDEHGIDPTGSYHGDSDLQLER|KESESCDCLQGFQLTHSLGGGTGSGMGTLLISK|LTTPTYGDLNHLVSATMSGVTTCLR|KLAVNMVPFPR|TLKLTTPTYGDLNHLVSATMSGVTTCLR|MSMKEVDEQMLNVQNK|AILVDLEPGTMDSVR|IREEYPDRIMNTFSVMPSPK|LHFFMPGFAPLTSR|ESESCDCLQGFQLTHSLGGGTGSGMGTLLISK|EVDEQMLNVQNK|FPGQLNADLR|IMNTFSVMPSPK|FPGQLNADLRK|LAVNMVPFPR|ISEQFTAMFR|…	0.68539	0	26.2724	0
Q04447	Ckb	Mus musculus	Creatine kinase B-type	3	3	0.287093	0.845776	380031	271056	444984	389089	490501	381397	440428	T	14	1	0.563327	-0.241652	42686.3	HGGYQPSDEHKTDLNPDNLQGGDDLDPNYVLSSR|VLTPELYAELR|LRFPAEDEFPDLSSHNNHMAK		0.17323	0	12.0916	0
Q9WVA3	Bub3	Mus musculus	Mitotic checkpoint protein BUB3	12	11	0.287153	0.920108	2188114	2.58103e+06	2241014	2864076	2.28451e+06	2515705	2.50006e+06	T	37	1	0.562945	-0.120124	36931.1	QGYVLSSIEGR|VAVEYLDPSPEVQK|TPCNAGTFSQPEK|TGSNEFKLNQPPEDGISSVK|VYTLSVSGDR|FSPNTSQFLLVSSWDTSVR|LNQPPEDGISSVK|AFPNKQGYVLSSIEGR|VLVWDLR|NMGYVQQR|LYDVPANSMR	MHDLNTDQENLVGTHDAPIR	0.42025	0	16.2702	0
P61982	Ywhag	Mus musculus	14-3-3 protein gamma	15	10	0.287186	1.06732	2.97709e+06	3.31808e+06	3.52481e+06	2.90486e+06	2.92415e+06	3.123e+06	3.30277e+06	T	126	1	0.562436	0.0939913	28284.9	TAFDDAIAELDTLNEDSYKDSTLIMQLLR|NVTELNEPLSNEER|NVTELNEPLSNEERNLLSVAYK|YLAEVATGEKR|TSADGNEKKIEMVR|YLAEVATGEK|VDREQLVQK|AYSEAHEISKEHMQPTHPIR|AYSEAHEISK|ATVVESSEK	DSTLIMQLLR|NLLSVAYK|YDDMAAAMK|MKGDYYR|EHMQPTHPIR	0.52632	0	23.2156	0
Q8CGZ0	Cherp	Mus musculus	Calcium homeostasis endoplasmic reticulum protein	14	14	0.287346	0.752879	1.34698e+06	1.39416e+06	1.2433e+06	2.23443e+06	2732399	1.30662e+06	1.20847e+06	T	45	1	0.562314	-0.40951	106102	VVVPIYCTSFLAVEEDKQQK|SPPHCELMAGHLR|MGWSGSGGLGAK|SYSFIAR|LLAAVEAFYSPPSHDRPR|EQGIQDPIKGGDVR|ITADGAHFELR|NVIDKLAQFVAR|ELLAALQK|NGPEFEK|DEFSTFGTR|LLQLWEK|LGEENKGHQMLVK|GDPGWNGQR		0.17094	0	11.2471	0
Q9JJ66	Cdc20	Mus musculus	Cell division cycle protein 20 homolog	3	3	0.287741	1.5755	233212	193521	259538	55772.7	193322	210621	190119	T	3	1	0.562566	0.655813	54781.7	LSGKPQNAPEGYQNR|SASQMEVASFLLSK|EATGPAPSPMR		0.08016	0	10.1924	0
Q8R1A4	Dock7	Mus musculus	Dedicator of cytokinesis protein 7	2	2	0.288214	1.19753	236838	182209	183102	217996	128825	179366	151923	T	4	1	0.562995	0.260057	241286	SAVRPASLNLNR|HKELFALHPSPDEEEPIER		0.01455	0	12.1093	0
O54825	Bysl	Mus musculus	Bystin	4	4	0.288604	0.83389	293849	243416	373628	466340	339272	352220	296515	T	11	1	0.562896	-0.26207	49752	QQQEELETDHGAGDR|HAPLAEQILAGNAVR|FYNLVLLPR|EALLELLR		0.1078	0	11.2693	0
A2BH40	Arid1a	Mus musculus	AT-rich interactive domain-containing protein 1A	10	10	0.288718	1.19404	1.10489e+06	740110	886523	809441	564420	833075	841758	T	17	1	0.562436	0.255856	241939	SNSVGIQDAFPDGSDPTFQKR|AGPPVPASHIAPTPVQPPMIR|ANHEGPWPSHGTR|VQEFDSGLLHWR|KSSSSTTTNEK|IGGGDTTEHIQTHFESK|NDMTYNYANR|QHYPYGGPYDR|TDEMLHTDQR|MSYEPNKDPYGSMR		0.06132	0	10.2811	0
E9QAT4	Sec16a	Mus musculus	Protein transport protein Sec16A	2	2	0.289007	1.33172	199867	91279.1	133515	99393.1	107077	134517	72785.2	T	2	1	0.562453	0.41329	254045	ASHYSDQLAPR|GPLELSPAYGPPGSALGFPESSR		0.01443	0.000503778	9.16562	4.14662e-05
P37804	Tagln	Mus musculus	Transgelin	10	9	0.289704	0.890572	1.72332e+06	1.74045e+06	2.0162e+06	1.84387e+06	2.54824e+06	1.97345e+06	1.88889e+06	T	62	1	0.56331	-0.167195	22561.4	ANKGPSYGMSR|DFTDSQLQEGK|QMEQVAQFLK|HVIGLQMGSNR|AAEDYGVIK|LGFQVWLK|GASQAGMTGYGRPR|KYDEELEER|LVEWIVVQCGPDVGRPDR	TLMALGSLAVTK	0.56219	0	14.292	0
P16045	Lgals1	Mus musculus	Galectin-1	6	6	0.289795	0.735339	2554590	2431442	1.48595e+06	2.94755e+06	3.90351e+06	1.69737e+06	3.3906e+06	T	53	1	0.563019	-0.443519	14856.2	ACGLVASNLNLKPGECLK|SFVLNLGKDSNNLCLHFNPR|FNAHGDANTIVCNTK|DSNNLCLHFNPR|SFVLNLGK|LPDGHEFKFPNR		0.48148	0	20.5349	0
Q8K310	Matr3	Mus musculus	Matrin-3	15	15	0.290169	1.15011	3087644	2387411	3.03629e+06	2.0441e+06	2.26129e+06	2656640	2.93567e+06	T	62	1	0.563215	0.201778	94571.8	LASLMNLGMSSSLNQQGAHSALSSASTSSHNLQSIFNIGSR|GNLGAGNGNLQGPR|GPLPLSSQHRGDTDQASNILASFGLSAR|VIHLSNLPHSGYSDSAVLK|TEEGPTLSYGR|GAPPSSNIEDFHGLLPK|VVHIMDFQR|RTEEGPTLSYGR|IGPYQPNVPVGIDYVIPK|YQLLQLVEPFGVISNHLILNK|SFQQSSLGR|GPGPLQER|RRTEEGPTLSYGR|SATREPPYRVPR|LAEPYGK		0.25532	0	20.2703	0
Q6Y7W8	Gigyf2	Mus musculus	GRB10-interacting GYF protein 2	4	4	0.290282	1.19937	742156	486134	645791	416939	458393	624850	580175	T	8	1	0.562834	0.262276	149102	LSGWGNVSKPAGTTK|AYLGDTSEAKEFAK|SLLEIQQEEAR|QREEEERQQQEEALR		0.0426	0	12.1813	0
Q9CXZ1	Ndufs4	Mus musculus	NADH dehydrogenase [ubiquinone] iron-sulfur protein 4, mitochondrial	2	2	0.29045	0.750699	260514	188582	199803	419461	371061	226010	188127	T	5	1	0.562678	-0.413694	19772.2	NGWSYDVEEK|SYGANFSWNKR		0.12	0.000997009	9.03523	5.37324e-05
Q922D4	Ppp6r3	Mus musculus	Serine/threonine-protein phosphatase 6 regulatory subunit 3	4	4	0.29115	1.31752	290553	720901	552385	414201	333954	344614	392518	T	7	1	0.563729	0.397829	94593.3	QDVLNWLNEER|CTAPLTPSSSPEQR|LGSFHELLLEPPKK|SVLEAIR		0.0545	0.000503778	9.24671	3.2533e-05
Q9QYR9	Acot2	Mus musculus	Acyl-coenzyme A thioesterase 2, mitochondrial	3	1	0.291383	1.3142	371513	334820	420407	177873	255486	332702	433609	T	6	1	0.563897	0.394183	49625.7	NATLSVEPEGR	GLAPEQPVTLR|HFLAPGVR	0.06623	0.000503778	9.17769	4.14662e-05
Q8VD65	Pik3r4	Mus musculus	Phosphoinositide 3-kinase regulatory subunit 4	5	5	0.291837	1.50337	237927	303807	277097	253663	78752.7	278931	191112	T	7	1	0.564171	0.588196	152502	GVIDLAALGITGR|KLVLLSVLKEPVSR|TELQQLIQQK|FLELVQLK|FWDLVSPER		0.03976	0	13.1557	0
Q9D773	Mrpl2	Mus musculus	Large ribosomal subunit protein uL2m	3	3	0.291864	1.24831	470589	349360	461814	263310	271913	386585	478342	T	6	1	0.563657	0.319981	33319.9	AGDTILNSNHIGR|AAGTCGVLLR|SADIALVAGGSR		0.11438	0	12.2084	0
P97304	Polr1d	Mus musculus	DNA-directed RNA polymerases I and III subunit RPAC2	3	3	0.292373	1.13862	449642	350918	304575	282965	311335	350042	337096	T	7	1	0.56397	0.18729	15062.6	MEDDQELERK|KTALEMVQAAGTDR|GALPAVEPFQK		0.26316	0	11.1988	0
Q00612	G6pdx	Mus musculus	Glucose-6-phosphate 1-dehydrogenase X	8	7	0.293416	0.932248	782626	790633	856621	879392	763846	887076	953124	T	18	1	0.565793	-0.101215	59224.8	EKPQPIPYVYGSR|VQPNEAVYTK|AEQVALSR|GPTEADELMKR|HLNSHMNALHQGMQANR|LPDAYER|IFTPLLHKIDR	RNELVIR	0.16311	0	11.1387	0
Q7TQH0	Atxn2l	Mus musculus	Ataxin-2-like protein	22	21	0.293458	1.14857	5194659	3.54978e+06	3.83471e+06	3.33026e+06	3285910	4200086	3.6557e+06	T	101	1	0.565416	0.199834	110580	REDIVDTMVFKPSDVLLVHFR|GAESILAASAPPQHQERPGAVAIGSVR|LQPSSSPETGLDPFPSR|RGAESILAASAPPQHQERPGAVAIGSVR|EFNPTKPLLSVNK|IAGKVPGLQNEQKR|FNEENYGVK|NLEAQELAR|EIESSPQYR|NVDFNYATK|MLHFLTAVVGSTCDVK|NGTTYEGIFK|LSLTPTDVK|TTYDSSLSSYTVPLEKDNSEEFRQR|STSTPTSPGPR|KFGAQFK|ESPSLVSR|LSLTPTDVKELPTKEPSR|GPHHLDNSSPGPGSEAR|DKFTDSAIAMNSK|TLSSKFELAVDAVHRK	IAMENDDGRTEEEKHSAVQR	0.27645	0	21.3761	0
P63165|P63166	SUMO1|Sumo1	Homo sapiens|Mus musculus	Small ubiquitin-related modifier 1	3	0	0.293799	1.14555	781849	978926	779308	607342	813478	679154	868895	C	19	2	0.565433	0.196045	11549.7		FLFEGQR|VIGQDSSEIHFK|QGVPMNSLR	0.27723|0.27723	0.000503778	10.2138	4.14662e-05
Q6ZQH8	Nup188	Mus musculus	Nucleoporin NUP188	3	3	0.294972	0.907993	245194	279231	265810	288863	337102	246099	293878	T	5	1	0.566852	-0.139247	196570	AAAAGGPCVR|ASPESQEPLIQLVQAFVR|TEAPTWETHGNLMTER		0.02501	0	9.3241	0
Q68FD5	Cltc	Mus musculus	Clathrin heavy chain 1	75	72	0.296122	1.20766	18737532	31790586	19834392	20723904	15461341	20532346	19229468	T	497	1	0.568901	0.272217	191435	KFDVNTSAVQVLIEHIGNLDR|LASTLVHLGEYQAAVDGAR|LAELEEFINGPNNAHIQQVGDR|KVSQPIEGHAASFAQFK|VGEQAQVVIIDMNDPSNPIRRPISADSAIMNPASK|TSIDAYDNFDNISLAQR|GQCDLELINVCNENSLFK|ISGETIFVTAPHEATAGIIGVNR|ISGETIFVTAPHEATAGIIGVNRK|ANVPNKVIQCFAETGQVQK|SVDPTLALSVYLR|WLLLTGISAQQNR|SVNESLNNLFITEEDYQALR|KFNALFAQGNYSEAAK|IHEGCEEPATHNALAK|WLKEDKLECSEELGDLVK|LHIIEVGTPPTGNQPFPK|AFMTADLPNELIELLEK|ALEHFTDLYDIKR|ADDPSSYMEVVQAANASGNWE…	MREHLELFWSR|TLQIFNIEMK|LLEMNLMHAPQVADAILGNQMFTHYDR	0.49194	0	22.2762	0
Q64378	Fkbp5	Mus musculus	Peptidyl-prolyl cis-trans isomerase FKBP5	7	7	0.296231	0.911173	510238	592466	584427	570549	663400	696079	545873	T	22	1	0.568628	-0.134203	50933.5	VLAVNPQNR|VHLEGCCGGR|ALGLDSANEK|MQREEQCILYLGPR|AWDIGVSTMK|KGEGYSNPNEGATVK|LTQAAIVK		0.16667	0.000503778	10.2844	4.14662e-05
O70251	Eef1b	Mus musculus	Elongation factor 1-beta	7	7	0.296272	0.910543	2184859	1.86585e+06	1949997	2119840	2.59565e+06	2.13181e+06	1.96764e+06	T	70	1	0.568113	-0.135201	24678.2	SSILLDVKPWDDETDMTKLEECVR|TPAGLQVLNDYLADK|GFGDLKTPAGLQVLNDYLADK|ASLPGVKK|LVPVGYGIK|SIQADGLVWGSSK|LVPVGYGIKK		0.33778	0	21.1899	0
O88448	Klc2	Mus musculus	Kinesin light chain 2	2	1	0.296434	0.84559	63082.3	55206.4	60033	53597.2	89969	80801.3	62290.7	T	2	1	0.567906	-0.24197	66621.3	LGPDDPNVAK	YEVAVPLCK	0.03172	0.00656353	8.13099	0.000608753
P14211	Calr	Mus musculus	Calreticulin	6	6	0.297197	0.747118	680180	969374	1.21014e+06	883201	1.74409e+06	954976	1.6147e+06	T	39	1	0.568927	-0.420592	47964.9	IKDPDAAKPEDWDER|KVHVIFNYK|FYGDLEKDKGLQTSQDAR|HEQNIDCGGGYVK|FYALSAK|QIDNPDYK		0.16827	0	14.2139	0
Q64433	Hspe1	Mus musculus	10 kDa heat shock protein, mitochondrial	10	10	0.297599	0.734244	2.62895e+06	4.8771e+06	4881590	4.01346e+06	7243319	4030320	7297627	T	107	1	0.569461	-0.445668	10955.9	VLQATVVAVGSGGK|SGEIEPVSVK|VGDKVLLPEYGGTK|VVLDDKDYFLFR|AGQAFRK|KFLPLFDR|VLLPEYGGTK|GGIMLPEK|GGIMLPEKSQGK|FLPLFDR		0.7451	0	17.2308	0
Q9DCN2	Cyb5r3	Mus musculus	NADH-cytochrome b5 reductase 3	3	3	0.297915	0.784383	389195	283888	195390	282173	450816	396830	314574	T	4	1	0.569595	-0.350369	34105.7	MSQYLENMK|IGDTIEFR|IGDTIEFRGPNGLLVYQGK		0.09302	0	10.0467	0
Q61768	Kif5b	Mus musculus	Kinesin-1 heavy chain	33	26	0.298587	1.13029	6886947	4614537	5790543	4550368	5.21022e+06	5343656	5062048	T	157	1	0.570342	0.176697	109484	SQEVEDKTKEYELLSDELNQK|GGGSFVQNNQPVGLR|SLTEYLQNVEQK|SATLASIDAELQK|NTIQWLENELNR|FQGEDTVMIASKPYAFDR|DQDNMQAELNR|LITDLQDQNQK|QLDDKDEEINQQSQLVEK|QLEESVDSLGEELVQLR|AAEMMASLLK|QAVEQQIQSHR|KLFVQDLATR|ADPAECNIK|TQMLDQEELLASTRR|LFVQDLATR|SHSIFLINVK|KLHELTVMQDRR|VFQSSTSQEQVYNDCAK|NGETVPIDEQFDKEK|GLEETVAKELQTLHNLR|STLLFGQR|QAVEQQIQSHRETHQK|QISSLRDEVEAKEK|MVLEQER|QISSLRDEVEAK	TGAEGAVLDEAK|LYLVDLAGSEK|HVAVTNMNEHSSR|ISFLENNLEQLTK|ILQDSLGGNCR|VKALESALKEAK|YQQEVDRIK	0.40395	0	16.3818	0
Q9EQC5	Scyl1	Mus musculus	N-terminal kinase-like protein	1	1	0.29873	1.2247	67731.8	91538.3	56954.4	70913.9	42232.3	59406.9	62358.3	T	1	1	0.570122	0.292432	89104	IGSYLSASTR		0.01241	0.000503778	9.08844	4.14662e-05
O55143	Atp2a2	Mus musculus	Sarcoplasmic/endoplasmic reticulum calcium ATPase 2	26	18	0.299976	1.04852	6.21223e+06	5.84078e+06	5652427	6006603	5224371	5.63575e+06	5.65822e+06	T	150	1	0.572199	0.0683567	114784	AKDIVPGDIVEIAVGDKVPADIR|DIVPGDIVEIAVGDKVPADIR|TVEEVLGHFGVNESTGLSLEQVKK|VGSTKVPMTPGVK|AFTGREFDELSPSAQR|IGIFGQDEDVTSK|NYLEQPGKECVQPATK|MNVFDTELKGLSK|CLALATHDNPLKR|IRDEMVATEQER|EFDELSPSAQR|RIGIFGQDEDVTSK|MNVFDTELK|VPMTPGVK|KSEIGIAMGSGTAVAK|EWGSGSDTLR|SMSVYCTPNKPSR|VIMITGDNKGTAVAICR	VGEATETALTCLVEK|VDQSILTGESVSVIK|NMLFSGTNIAAGK|GAPEGVIDR|KEFTLEFSR|EFTLEFSR|VIMITGDNK|NAENAIEALKEYEPEMGK	0.26724	0	19.2735	0
Q80UZ2	Sdad1	Mus musculus	Protein SDA1 homolog	3	3	0.300076	0.90035	324938	256004	348500	314913	380029	335935	337098	T	8	1	0.57188	-0.151442	79508.4	VLTQDDFQK|GKPTEASIEAR|LATAMAGR		0.04076	0	10.1991	0
Q6DFW4	Nop58	Mus musculus	Nucleolar protein 58	8	8	0.300403	1.11075	1.15884e+06	1.20879e+06	1.14332e+06	870917	999685	1163323	1.21538e+06	T	19	1	0.572187	0.151535	60304.7	LIAHAGSLLNLAK|KIEEVDKEDEITEK|LNLSCIHSPVVNELMR|TYDPSGDSTLPTCSK|HAASTVQILGAEK|KLQEVDSLWKEFETPEK|EAHEPLAVADAK|YGLIYHASLVGQSSPK		0.21642	0	15.2092	0
O08547	Sec22b	Mus musculus	Vesicle-trafficking protein SEC22b	2	2	0.300597	0.818898	153156	272020	257148	284478	318519	240911	240583	T	4	1	0.571761	-0.288243	24724.8	KVPTVSRPYSFIEFDTFIQK|ANNLSSLSK		0.13488	0	11.1502	0
P62627	Dynlrb1	Mus musculus	Dynein light chain roadblock-type 1	2	2	0.301328	0.870151	454489	527790	670094	552886	743528	626821	591614	T	18	1	0.57246	-0.200662	10982.8	AEVEETLKR|EIDPQNDLTFLR		0.21875	0	11.1718	0
Q99JY9	Actr3	Mus musculus	Actin-related protein 3	18	14	0.301412	1.07845	3.016e+06	3.862e+06	3.52519e+06	3.08744e+06	3095336	3.38101e+06	3.24101e+06	T	75	1	0.572101	0.108962	47327	TLTGTVIDSGDGVTHVIPVAEGYVIGSCIK|GVDDLDFFIGDEAIEKPTYATK|AGRLPACVVDCGTGYTK|NIVLSGGSTMFR|LKPKPIDVQVITHHMQR|EFSIDVGYER|YLRAEPEDHYFLLTEPPLNTPENR|LKLSEELSGGR|LSEELSGGR|FMEQVIFK|KDYEEIGPSICR|QYTGVNAISKK|DYEEIGPSICR|DREVGIPPEQSLETAK	DITYFIQQLLR|HGIVEDWDLMER|HIPIAGR|HNPVFGVMS	0.54785	0	18.1802	0
P30285	Cdk4	Mus musculus	Cyclin-dependent kinase 4	3	3	0.301453	1.15692	408370	427322	545582	415316	308978	409239	462089	T	6	1	0.571642	0.210292	33729.4	LMDVCATSR|ALQHSYLHKEESDAE|VTLVFEHIDQDLR		0.12211	0.000503778	9.24598	4.14662e-05
P26041	Msn	Mus musculus	Moesin	13	5	0.302385	0.888268	671244	618596	781696	670152	934178	717241	797975	T	53	1	0.57276	-0.170933	67724.9	ERQEAEEAKEALLQASR|KTQEQLASEMAELTAR|ISQLEMAR|ESEAVEWQQK|KESPLLFK	APDFVFYAPR|IGFPWSEIR|RKPDTIEVQQMK|LFFLQVK|ALELEQER|NISFNDKK|KPDTIEVQQMKAQAR|QLFDQVVK	0.21664	0	12.3683	0
Q61990	Pcbp2	Mus musculus	Poly(rC)-binding protein 2	12	6	0.302773	1.11926	2867285	2.38337e+06	2.10645e+06	2.41728e+06	2.20218e+06	1873679	2237089	T	90	1	0.572823	0.162546	38197.4	LHQLAMQQSHFPMTHGNTGFSGIESSSPEVK|IITLAGPTNAIFK|AITIAGIPQSIIECVK|IANPVEGSTDRQVTITGSAASISLAQYLINVR|IANPVEGSTDR|GVTIPYRPKPSSSPVIFAGGQDR	ESTGAQVQVAGDMLPNSTER|LLMHGKEVGSIIGK|LVVPASQCGSLIGK|INISEGNCPER|EVGSIIGK|QMSGAQIK	0.50276	0	17.3114	0
Q922U1	Prpf3	Mus musculus	U4/U6 small nuclear ribonucleoprotein Prp3	15	15	0.303207	1.15528	2.64985e+06	1.84425e+06	2.91955e+06	1896139	2153349	2.28723e+06	2.08016e+06	T	76	1	0.573209	0.208244	77406.9	FVDKLFEAVEEGR|VLGTEAVQDPTKVEAHVR|TVDATGKEVELTHR|FEEVEEEPEVIPGPPSESPGMLTK|AADHLKPFLDDSTLR|LQAEISQAAR|VLGFSEPTVVTAALNCVGK|LGLTPPPEPK|VSIAPSQR|QMMEAATR|EKPSEDMESNTFFDPR|ELDELKPWIEK|FKQCPTENMAR|LKEDISQGVHISVYR|LQAEISQAARK		0.28258	0	15.2516	0
Q9CQE3	Mrps17	Mus musculus	Small ribosomal subunit protein uS17m	1	1	0.303382	1.67721	112132	243748	144878	46530.9	59004.9	187351	153908	T	3	1	0.573253	0.746066	13373.4	LVLDPYLLK		0.075	0.00196464	8.2661	7.70852e-05
Q8BUI3	LRWD1	Mus musculus	Leucine-rich repeat and WD repeat-containing protein 1	1	1	0.303507	0.911112	106041	105152	122835	117566	142184	107352	123004	T	5	1	0.573029	-0.1343	71548.8	APLTPQLLLQR		0.01698	0	13.1003	0
Q8BL97	Srsf7	Mus musculus	Serine/arginine-rich splicing factor 7	9	8	0.303559	0.872243	2.86827e+06	2.25322e+06	2.41814e+06	2.55403e+06	3.71457e+06	2.69639e+06	2.6388e+06	T	66	1	0.572523	-0.197197	30798.8	VYVGNLGTGAGKGELER|NPPGFAFVEFEDPRDAEDAVR|VRVELSTGMPR|AFSYYGPLR|RPFDPNDR|NPPGFAFVEFEDPRDAEDAVRGLDGK|VELSTGMPR|VRVELSTGMPRR	NPPGFAFVEFEDPR	0.26966	0	18.2707	0
P19182	Ifrd1	Mus musculus	Interferon-related developmental regulator 1	1	1	0.303598	1.2378	60601.2	48238.2	86940.2	38165.4	56994.5	59219	53237.9	T	1	1	0.572004	0.307781	49903.2	GGGGGGGSGAATSAATAGGPHR		0.049	0	15.5219	0
Q9CQQ7	Atp5pb	Mus musculus	ATP synthase F(0) complex subunit B1, mitochondrial	11	11	0.303985	0.879434	2.58737e+06	3.60533e+06	3482867	3.19377e+06	3.48876e+06	3.67962e+06	4227294	T	76	1	0.572093	-0.185352	28930.4	RKEEEHMIDWVEK|LGLIPEEFFQFLYPK|NRLDYHISVQNMMR|IAQLEEVKQSSMK|HYLFDVQR|PLPPLPEYGGK|QIQDAIDMEK|CIEDLKLLAK|KAQAQPIM|IAQLEEVK|PLPPLPEYGGKVR		0.40625	0	15.1735	0
Q62432|Q8BUN5|Q9JIW5	Smad2|Smad3|Smad9	Mus musculus	Mothers against decapentaplegic homolog 2|Mothers against decapentaplegic homolog 3|Mothers against decapentaplegic homolog 9	2	0	0.304222	1.15921	207383	241897	234556	204251	145301	213875	233503	T	7	3	0.572026	0.213141	52232.735981057915|48049.75124613674|48604.99132478271		VETPVLPPVLVPR|FCLGLLSNVNR	0.05139|0.05647|0.05581	0.000503778	9.21857	4.14662e-05
P29595|Q15843	Nedd8|NEDD8	Mus musculus|Homo sapiens	NEDD8	2	0	0.305164	1.32413	244939	254094	431493	141448	233421	284207	278792	T	16	2	0.572713	0.405042	8966.87333788882|9065.95298519218		TLTGKEIEIDIEPTDKVER|QMNDEKTAADYK	0.38272|0.38272	0	18.2561	0
P67871	Csnk2b	Mus musculus	Casein kinase II subunit beta	4	4	0.30523	0.910796	542908	652184	556239	696002	689489	546556	634874	T	17	1	0.572332	-0.1348	24926	YQQGDFGYCPR|CMDVYTPK|GIAQMLEK|RPANQFVPR		0.16744	0	11.2017	0
Q921M4	Golga2	Mus musculus	Golgin subfamily A member 2	1	1	0.305289	1.64284	76818.2	111962	59774.6	25138	29077.5	96942.4	79790.1	T	2	1	0.571889	0.716195	113209	LLELQELVLR		0.01001	0.000503778	9.07533	4.14662e-05
Q6P9P6	Kif11	Mus musculus	Kinesin-like protein KIF11	9	9	0.305878	0.850923	797126	718233	915622	1.28331e+06	773728	942468	861516	T	18	1	0.572203	-0.2329	117953	LQLVKEEYVSSALER|VITALVER|AIDEHNAEAQESFGK|LNLVDLAGSENIGR|ILQDSLGGR|CRPFNLAER|EQLLDQLQK|KYENIQKPLNSIQENTELR|TSIIATISPASFNLEETLSTLEYAHR		0.11787	0	16.1588	0
P31786	Dbi	Mus musculus	Acyl-CoA-binding protein	3	3	0.306065	0.791578	369642	661585	548781	476362	725711	599311	844682	T	17	1	0.57207	-0.337197	9994.14	SQAEFDKAAEEVKR|QATVGDVNTDRPGLLDLK|TQPTDEEMLFIYSHFK		0.55172	0	15.2754	0
Q9CQL5	Mrpl18	Mus musculus	Large ribosomal subunit protein uL18m	1	1	0.306365	1.39919	126894	192390	150122	149915	55873.8	150867	116664	T	2	1	0.572018	0.484593	20663.6	LQNAMTESGVMLREPR		0.08889	0.000997009	9.12091	6.65894e-05
Q9D1P0	Mrpl13	Mus musculus	Large ribosomal subunit protein uL13m	4	4	0.306976	2.22147	270343	474306	338751	252626	27904.4	264653	336060	T	5	1	0.572368	1.15152	20663.6	APQQWATFAR|HIAFSGNKWEQK|LAVIASNK|VWTPPDDFRM		0.22472	0	13.0762	0
Q9Z1N5	Ddx39b	Mus musculus	Spliceosome RNA helicase Ddx39b	10	2	0.30846	0.772745	219526	268917	293499	345365	469909	200534	386358	T	67	1	0.57481	-0.371936	49004	NCPHIVVGTPGR|VNIAFNYDMPEDSDTYLHR	GSYVSIHSSGFRDFLLKPELLR|RILVATNLFGR|ILVATNLFGR|DFLLKPELLR|DVQEIFR|YQQFKDFQR|RDVQEIFR|ELAFQISK	0.20794	0	15.1123	0
Q9D8U8	Snx5	Mus musculus	Sorting nexin-5	3	3	0.30877	0.813378	238212	455638	371846	508026	406978	355944	429788	T	7	1	0.574888	-0.298002	46768.1	VSSDEDLKLTELLR|LGEGEGSMTKEEFAK|TVSTHEVFLQR		0.09901	0	10.202	0
P68181	Prkacb	Mus musculus	cAMP-dependent protein kinase catalytic subunit beta	3	1	0.309742	1.65113	96850.9	196031	141917	156419	34297.8	70201.8	133942	T	7	1	0.576073	0.723453	40682	KGSEVESVKEFLAK	TLGTGSFGR|KVEAPFIPK	0.09117	0	11.1053	0
Q9D1A2	Cndp2	Mus musculus	Cytosolic non-specific dipeptidase	3	3	0.31024	0.79391	263713	223232	316756	281613	413902	234363	455643	T	3	1	0.576348	-0.332953	52733.6	TVFGVEPDLTR|LGGSVELVDIGK|LNYIEGTK		0.06526	0	12.2627	0
Q8C5L3	Cnot2	Mus musculus	CCR4-NOT transcription complex subunit 2	3	3	0.31027	1.15639	281611	267051	218883	180842	205634	283148	222391	T	3	1	0.575872	0.209629	59672.9	FASPWASSPCRPQDIDFHVPSEYLTNIHIR|EGSGNPTPLINPLAGR|GMSNNTPQLNR		0.10556	0.000503778	9.14299	4.14662e-05
P70398	Usp9x	Mus musculus	Probable ubiquitin carboxyl-terminal hydrolase FAF-X	23	23	0.310579	1.1901	2.40648e+06	3.44385e+06	2.57236e+06	2.87539e+06	1747379	2.48676e+06	2.35844e+06	T	56	1	0.575857	0.251085	290526	TGETGVEETILEGHLGVTK|AIDLLKEIYTNLGPR|LAQQISDEASR|HLQVIFGHLAASR|YSHVQEVQER|GIPDDRDGLFDTIQR|VVIQSNDDIACR|KQNVQFMHNR|EYINECDSDYHEER|MYGRDNEDYDPQTVR|HGSSEDEEWLTAER|LDDMINRPR|HSGDYFTLLR|AKHSGDYFTLLR|NHQNLLDSLEQYVK|NEAKNDALSMIIK|LYSVVSQLIR|TILPMSR|MDTIGHDDEVIR|HLSFIVR|LIGQLNLKDK|WVVPVLPK|LQYYVPR		0.10043	0	15.2543	0
Q9CPN8	Igf2bp3	Mus musculus	Insulin-like growth factor 2 mRNA-binding protein 3	11	9	0.310839	1.1812	1.61386e+06	1.29071e+06	1.4136e+06	925404	1233633	1.62853e+06	1.16615e+06	T	56	1	0.575953	0.240255	63535.5	QALDKLNGFQLENFTLK|LYIGNLSDHAGPADLESVFKDAK|IPVAGPFLVK|IAPAEAPDAK|VPSFAAGR|FTEEIPLK|SILEIMHK|AIEALSGK|IQEILTQVK	MVIITGPPEAQFK|ILAHNNFVGR	0.21416	0	13.439	0
P51807	Dynlt1	Mus musculus	Dynein light chain Tctex-type 1	1	1	0.311853	1.12597	118249	145542	136606	112367	101349	116504	146589	T	2	1	0.577467	0.17117	12475	EAIESAIGGNAYQHSK		0.14159	0.000503778	9.16556	4.14662e-05
B9EJR8	Dnaaf5	Mus musculus	Dynein axonemal assembly factor 5	1	1	0.312551	0.662482	46868.2	55795.6	101245	178353	125607	58475	67376.6	T	1	1	0.578151	-0.594047	93791.2	AAPAEAEVAAAPGLTEAAEAAELTR		0.02931	0	10.0507	0
P35527	KRT9	Homo sapiens	Keratin, type I cytoskeletal 9	47	37	0.312945	0.465737	9539928	39798060	4721084	41841464	56350116	12432077	15787873	C	491	1	0.578426	-1.10241	62026.8	HGVQELEIELQSQLSK|NRKDIENQYETQITQIEHEVSSSGQEVQSSAK|GGSGGSYGGGGSGGGYGGGSGSR|YCGQLQMIQEQISNLEAQITDVRQEIECQNQEYSLLLSIK|NYSPYYNTIDDLKDQIVDLTVGNNK|SGGGGGGGLGSGGSIR|DIENQYETQITQIEHEVSSSGQEVQSSAK|DIENQYETQITQIEHEVSSSGQEVQSSAKEVTQLR|GGGGSFGYSYGGGSGGGFSASSLGGGFGGGSR|HGVQELEIELQSQLSKK|LASYLDKVQALEEANNDLENK|EIETYHNLLEGGQEDFESSGAGK|KDIENQYETQITQIEHEVSSSGQEVQSSAK|LEKEIETYHNLLEGGQEDFESSGAGK|GGSGGSHGGGSGFGGESGGS…	SDLEMQYETLQEELMALKK|MRLEKEIETYHNLLEGGQEDFESSGAGK|NHKEEMSQLTGQNSGDVNVEINVAPGKDLTK|TLNDMRQEYEQLIAK|QVLDNLTMEK|IKFEMEQNLR|MTLDDFR|STMQELNSR|FEMEQNLR|LASYLDK	0.96469	0	28.4373	0
P39749	Fen1	Mus musculus	Flap endonuclease 1	10	10	0.313047	0.892837	1.95517e+06	1693215	2042994	2229433	2.44818e+06	2.14971e+06	1.71546e+06	T	50	1	0.578009	-0.163531	42287.9	QHNDECKHLLSLMGIPYLDAPSEAEASCAALAK|VYAAATEDMDCLTFGSPVLMR|RLDPSKYPVPENWLHK|QLQQAQEAGMEEEVEKFTK|RAVDLIQK|LIADVAPSAIRENDIK|KLPIQEFHLSR|LIADVAPSAIR|LDDFFKVTGSLSSAK|SIEEIVR		0.38624	0	15.2464	0
Q9CQR2	Rps21	Mus musculus	Small ribosomal subunit protein eS21	8	6	0.313187	0.904204	2.85513e+06	2.42113e+06	3375778	2.98393e+06	3401529	2981034	3297063	T	70	1	0.577767	-0.14528	9135.55	MQNDAGEFVDLYVPR|MQNDAGEFVDLYVPRK|DHASIQMNVAEVDR|DHASIQMNVAEVDRTTGR|TYGICGAIR|TYGICGAIRR	RMGESDDSILR|MGESDDSILR	0.6506	0	18.5468	0
Q8VI63	Mob2	Mus musculus	MOB kinase activator 2	3	3	0.313305	0.738597	236717	243963	275562	463013	503283	307919	187452	T	6	1	0.57745	-0.43714	26834.3	KVYLEPEHTK|LVTDEDVFPTK|ITDFEFK		0.11915	0.00196464	8.23619	7.70852e-05
Q9Z110	Aldh18a1	Mus musculus	Delta-1-pyrroline-5-carboxylate synthase	16	16	0.31414	1.08802	2.42715e+06	2.42104e+06	2514016	2.00674e+06	2.0947e+06	2.66824e+06	2.30622e+06	T	81	1	0.578984	0.121707	87211.9	GPVGLEGLLTTK|VSGHVITDIVEGK|AEIINHLADLLTDQREEILLANKK|LRHEILLSQSVR|QIAASSQESVGR|ILHLLTQEALSIHGVK|GQDHVVSDFSEHGSLK|VGTFFSEVKPAGPTVEQQGEMAR|FASYLTFSPSEVK|IIDLIIPR|LNSLAIGLR|MLATLEPEQR|YLHENLPVPQR|LGSAVVTR|DLEEAEGR|VSGHVITDIVEGKK		0.24654	0	14.2397	0
O09106	Hdac1	Mus musculus	Histone deacetylase 1	8	5	0.315212	1.16753	759122	751001	1008981	657830	565129	848518	816185	T	59	1	0.58062	0.223457	55039.7	LHISPSNMTNQNTNEYLEK|YYAVNYPLRDGIDDESYEAIFKPVMSK|QQTDIAVNWAGGLHHAK|GVKEEVKLA|YHSDDYIK	MTHNLLLNYGLYR|YGEYFPGTGDLR|SIRPDNMSEYSK	0.24274	0	18.3997	0
Q8K2V1	Ppp4r1	Mus musculus	Serine/threonine-protein phosphatase 4 regulatory subunit 1	2	2	0.315387	1.16803	113529	109027	105837	83714.2	75351.9	129251	94455.4	T	2	1	0.580366	0.224081	106230	ASSLDAHEETGGVEQR|LESLEGCAAK		0.02734	0	10.1026	0
Q60760	Grb10	Mus musculus	Growth factor receptor-bound protein 10	4	4	0.315443	1.23379	269047	389457	361832	182801	281841	318358	335113	T	5	1	0.579877	0.303102	70539.7	NQCPTDTVNPVAR|QQGLVDGLFLLR|VFSEDGTSKVVEILTDMTAR|MNILSSQSPLHPSTLNAVIHR		0.10628	0	13.4867	0
Q8C7R4	Uba6	Mus musculus	Ubiquitin-like modifier-activating enzyme 6	2	2	0.315649	1.71833	292577	150642	208590	44979.3	183643	100897	265062	T	3	1	0.579848	0.781009	117891	SYTAAEATLK|CLANLRPLLDSGTMGTK		0.02564	0	10.1215	0
P58742	Aaas	Mus musculus	Aladin	2	2	0.315969	1.73056	75904.7	119330	71087.8	40736	114125	74011.2	18017.2	T	2	1	0.579762	0.791236	59392.9	FAVALLDDSIR|GNPQVQDGNPVILLFR		0.04945	0	12.2181	0
Q99N89	Mrpl43	Mus musculus	Large ribosomal subunit protein mL43	5	5	0.316341	1.1785	591093	565365	448371	429468	338196	518148	548227	T	9	1	0.579592	0.23695	20190.4	LADQSGLDVIR|FLTSVLHNGLGR|YVQQLQR|DAPSSRGAR|EVTDFAR		0.25137	0	12.0555	0
Q9CR62	Slc25a11	Mus musculus	Mitochondrial 2-oxoglutarate/malate carrier protein	2	2	0.316363	0.877928	140309	197133	138874	176417	153050	197386	190003	T	6	1	0.579084	-0.187825	34132.9	AATASPGAGR|NVFNALVR		0.05732	0.00656353	8.05678	0.000619272
Q3TEA8	Hp1bp3	Mus musculus	Heterochromatin protein 1-binding protein 3	2	2	0.317472	1.09719	296067	256591	296794	246521	223105	298710	267527	T	5	1	0.580537	0.133818	60829.1	ATDMSQGELIHPK|GQLEQITGK		0.03971	0.000503778	9.15687	4.14662e-05
Q8BHN3	Ganab	Mus musculus	Neutral alpha-glucosidase AB	8	8	0.317801	0.797023	548122	982883	751005	815965	1.31047e+06	738944	938504	T	26	1	0.580508	-0.327307	106844	LSFQHDPETSVLILR|SGGIERPFVLSR|IILTAQPFRLDLLEDR|TCDESSFCKR|SIRPGLSPYR|VVIMGAGKPAAVVLQTK|LDLLEDR|HHGPQTLYLPVTLSSIPVFQR		0.10699	0	12.314	0
Q8CIB5	Fermt2	Mus musculus	Fermitin family homolog 2	10	10	0.317841	1.14941	1.14665e+06	1494092	1212825	1.31167e+06	861350	1.17139e+06	1.1478e+06	T	38	1	0.580101	0.2009	77750.5	ILEAHQNVAQMSLIEAK|SLMEQDVKENEALLLR|GCEVTPDVNISGQK|SREESSGTPAHQLNLR|INQLYEQAK|TNQGWLDSSR|FQGGKREELIGIAYNR|FKYYSFFDLNPK|MDASTGDAIK|MFKPQALLDK		0.19118	0	15.1543	0
Q3UKJ7	Smu1	Mus musculus	WD40 repeat-containing protein SMU1	7	7	0.319064	1.16148	1.3538e+06	1.38331e+06	1.70188e+06	950641	1.31763e+06	1.33549e+06	1.54067e+06	T	29	1	0.582059	0.215961	57507.2	AAVKDVEEEKFPTQLSR|YIHLENLLAR|LMALLGQALK|QTDPMIMLK|DVIGIAHHPHQNLIATYSEDGLLK|NPEHFVVCNR|IQSGQCLR		0.17154	0	18.151	0
P18760	Cfl1	Mus musculus	Cofilin-1	18	14	0.320264	1.07028	14034623	11344395	11889505	11241780	11402074	12446138	11186080	T	263	1	0.584007	0.0979939	18547.7	ASGVAVSDGVIKVFNDMK|NIILEEGKEILVGDVGQTVDDPYTTFVK|LTGIKHELQANCYEEVKDR|KEDLVFIFWAPENAPLK|LGGSAVISLEGKPL|HELQANCYEEVKDR|ASGVAVSDGVIK|KAVLFCLSEDKK|ESKKEDLVFIFWAPENAPLK|ASGVAVSDGVIKVFNDMKVR|AVLFCLSEDKK|SSTPEEVKKR|NIILEEGK|MLPDKDCR	YALYDATYETK|MIYASSKDAIK|MIYASSK|MIYASSKDAIKK	0.92771	0	24.472	0
Q62448	Eif4g2	Mus musculus	Eukaryotic translation initiation factor 4 gamma 2	12	12	0.321316	0.927592	1.10347e+06	1.1792e+06	1.23018e+06	1.20082e+06	1122393	1.43507e+06	1.30766e+06	T	34	1	0.585647	-0.108437	102041	KGQLNADEISLRPAQSFLMNK|SQGLSQLYHNQSQGLLSQLQGQSK|TNPPLIQEKPAK|KAFLDNGPK|TAGNSEFLGK|MLPEIDQNKDR|LTEAVVTDYLNSGNANDAVSGVR|MESAIAEGGASR|LQDEFENR|FSPTMGR|FLLQDTVELREHHWVPR|FSASSGGGGSR		0.18212	0	15.2037	0
P14733	Lmnb1	Mus musculus	Lamin-B1	15	12	0.322011	0.85249	1.26168e+06	989479	1.56574e+06	1.31995e+06	1744067	1.24922e+06	1.60909e+06	T	58	1	0.586075	-0.230245	66744.8	DAALATALGDKK|LREYEAALNSK|ATATPVQQQR|LYKEELEQTYHAK|ASAPATPLSPTR|CQSLTEDLEFRK|LVEVDSGR|FKAEHDQLLLNYAKK|ALYETELADARR|ESDLSGAQIK|LAVYIDK|LAQALHEMREQHDAQVR	LLEGEEER|LQEKEELRELNDR|LALDMEISAYRK	0.29252	0	14.2387	0
Q99LD4	Gps1	Mus musculus	COP9 signalosome complex subunit 1	2	2	0.322245	0.7289	181823	524086	395762	355200	537571	446934	524997	T	7	1	0.585937	-0.456207	53408.1	ALIQYFSPYVSADMHK|TLYTQIR		0.04883	0	13.1511	0
Q9CWS4	Ints11	Mus musculus	Integrator complex subunit 11	2	2	0.322405	0.685231	21702.7	61867	48378.3	39901.3	51308.4	59837.5	96679.8	T	3	1	0.585846	-0.545339	67799.6	GIMQLVGQAEPESVLLVHGEAK|VLIPVFALGR		0.05333	0	12.0958	0
Q80WJ7	Mtdh	Mus musculus	Protein LYRIC	8	8	0.322482	1.19956	1.38727e+06	884381	1.46044e+06	943624	857449	1.26788e+06	1.02458e+06	T	34	1	0.585526	0.262501	63807.7	KTEPSAWTQDTGDTNANGKDWGR|HDGKEVDEGAWETK|NKGDSHLNVQVSNFK|TMSTSDPAEVLIK|TVEVPEDEVVRNPR|KREEAAPPTPAPDDLAQLK|SGKGDSTLQVSSR|SETNWESPK		0.20725	0	18.2573	0
Q61584	Fxr1	Mus musculus	RNA-binding protein FXR1	27	25	0.322974	1.10377	6.68203e+06	6259375	7447975	5.78601e+06	5.31583e+06	7.27024e+06	6362364	T	179	1	0.586054	0.142443	76175.3	IFYHPETTQLMILSASEATVKR|KVPGVTAIELDEDTGTFR|GFLEFVEDFIQVPR|SSISSVLKDPDSNPYSLLDNTESDQTADTDASESHHSTNR|AINGPTSASGDEIPKLPR|VIQEIVDKSGVVR|RVNILSDMHLR|IFYHPETTQLMILSASEATVK|GFIKDVHEDSLTVVFENNWQPER|IYGESAEAVKK|VRIEGDNENKLPR|ANDQEPCGWWLAK|SSISSVLKDPDSNPYSLLDNTESDQTADTDASESHHSTNRR|EMAKDVIEEHGPSEK|EDGMVPFVFVGTK|EISEGDEVEVYSR|ESIGNVQVLLEYHIAYLK|VNILSDMHLR|VIQEIVDK|AELTVEVR|QVPFNEVR|IYGESAEAVK|KEISEGDEVEVYSR|I…	LQIDEQLR|GSNGAFYK	0.44313	0	20.1675	0
Q8BWU5	Osgep	Mus musculus	tRNA N6-adenosine threonylcarbamoyltransferase	5	5	0.323304	1.14472	548887	505545	795417	483039	550806	562158	519377	T	10	1	0.586387	0.194993	36277.3	TPLKDSAITQR|YRTDEVEVTWRD|LVELPYTVK|DGTVLANPR|GAQLFATDER		0.15224	0	10.2639	0
Q8BGZ4	Cdc23	Mus musculus	Cell division cycle protein 23 homolog	4	4	0.32376	1.25106	281104	471194	355480	342761	192352	338929	310597	T	10	1	0.58641	0.323154	68517.8	QLLLIAGLTR|AYAVGDVEK|KDDETVDSLGPLEK|AALYFQR		0.067	0.000503778	10.2293	4.14662e-05
Q9DCW4	Etfb	Mus musculus	Electron transfer flavoprotein subunit beta	12	12	0.323835	0.903833	2.94252e+06	2.15794e+06	2.69014e+06	2.73217e+06	3.17722e+06	2.60389e+06	2.91642e+06	T	70	1	0.585995	-0.145873	27606	GIHVEIPGAQAESLGPLQVAR|LAEKEKVDLLFLGK|AGDLGVDLTSK|HSMNPFCEIAVEEAVR|VSVISVEEPPQR|LKLPAVVTADLR|EIDGGLETLR|YATLPNIMKAK|TALAMGADR|VIDFAVK|SGVVTDGVK|LPAVVTADLR		0.51765	0	19.2971	0
Q9EQP2	Ehd4	Mus musculus	EH domain-containing protein 4	1	1	0.324228	1.49108	72608.6	85637.2	74551.3	30879.1	117819	34199.6	58331.7	T	2	1	0.586089	0.576357	61441.4	LPEIYVQLQR		0.01848	0	10.0679	0
P46471	Psmc2	Mus musculus	26S proteasome regulatory subunit 7	28	28	0.324435	1.05761	9794558	9610718	9395670	8835385	8744475	10290606	8534819	T	196	1	0.586087	0.0808032	48617.1	INELTGIKESDTGLAPPALWDLAADKQTLQSEQPLQVAR|FVVDLSDQVAPTDIEEGMR|FDDGAGGDNEVQR|IINADSEDPKYIINVK|ALDEGDIALLK|QVEDDIQQLLKK|SVCTEAGMFAIR|LREVVETPLLHPER|KIEFSLPDLEGR|DIRFELLAR|QVEDDIQQLLK|TYGQSTYSR|IATEKDFLEAVNK|LCPNSTGAEIR|GVLLFGPPGTGK|FVNLGIEPPKGVLLFGPPGTGK|IATEKDFLEAVNKVIK|TDACFIR|PDYLGADQRK|QIKQVEDDIQQLLK|INELTGIK|TMLELINQLDGFDPRGNIK|KACLIFFDEIDAIGGAR|PDYLGADQR|VIGSELVQK|AVANRTDACFIR|EVVETPLLHPER|ELFE…		0.67436	0	23.2934	0
Q8BGT7	Smndc1	Mus musculus	Survival of motor neuron-related-splicing factor 30	5	5	0.326064	0.859312	1.41832e+06	1.11176e+06	1.2821e+06	1.44711e+06	1.98778e+06	1.34413e+06	1.21252e+06	T	28	1	0.589183	-0.218746	26736.5	AQLQQVEAALSGNGENEDLLK|SIFASPESVTGK|DLQEVIELTK|VGVGTCGIADKPMTQYQDTSKYNVR|VGVGTCGIADKPMTQYQDTSK		0.28571	0	19.162	0
Q99PT1	Arhgdia	Mus musculus	Rho GDP-dissociation inhibitor 1	2	2	0.326297	0.778024	213331	321783	237840	371854	369153	194780	422772	T	9	1	0.589061	-0.362113	23392.8	SIQEIQELDKDDESLRK|LTLVCSTAPGPLELDLTGDLESFKK		0.20588	0	13.0782	0
Q99PL5	Rrbp1	Mus musculus	Ribosome-binding protein 1	60	60	0.326898	1.24752	19474772	9615077	16514130	10494566	10678838	14940564	11108546	T	324	1	0.59	0.319067	172776	SIEALLEAGQAQDTQASHAEANQQQTR|LREAEETQNSLQAECDQYR|KTDTVANQGTKQEGVSNQVK|VAKVEPAVSSIVNSIQVLASK|KKGEPGPPDCDGPLFLPYK|TLVSTVGSMVFSEGEAQR|TLQEQLENGPNTQLAR|SKCEELSSLHGQLK|AAGPLESSGKEEITQLKER|ASMVQSQEAPKQDAPAK|AQTSHANLRADAEKAQEQQQR|QVLQLQASHKESEEALQKR|DALNQATSQVESK|VSAVAVAPTSVHSSVGHTPIATVPAMPQEK|TILAETEGMLKDLQK|LQEQLGKAEDGSSSKEGTSV|QVLQLQASHKESEEALQK|LLATEQEDAAVAK|HLEDIVEK|AKVGAAEEELHK|SLTQAKEESEKQLHLAEAQT…		0.41807	0	26.2913	0
O08749	Dld	Mus musculus	Dihydrolipoyl dehydrogenase, mitochondrial	11	11	0.32929	1.10705	1333486	1.56711e+06	1.55503e+06	1.30315e+06	1.47442e+06	1.1084e+06	1.50474e+06	T	32	1	0.594066	0.146717	54238.2	RPFTQNLGLEELGIELDPK|IGKFPFAANSR|ADGSTQVIDTK|VCHAHPTLSEAFR|ALTGGIAHLFK|TVCIEKNETLGGTCLNVGCIPSK|SAQLGFK|SEEQLKEEGIEFK|ALLNNSHYYHMAHGKDFASR|GIEIPEVR|TNADTDGMVK		0.28684	0	16.3772	0
P00405	Mtco2	Mus musculus	Cytochrome c oxidase subunit 2	5	2	0.32945	1.18987	3.2094e+06	5423814	4164665	3.44109e+06	2.9404e+06	4.40281e+06	3385199	T	48	1	0.593844	0.250801	25959	MLISSEDVLHSWAVPSLGLKTDAIPGR|LLEVDNR	LLEVDNRVVLPMELPIR|MLISSEDVLHSWAVPSLGLK|VVLPMELPIR	0.19383	0	17.3511	0
Q8R4U7	Luzp1	Mus musculus	Leucine zipper protein 1	4	4	0.329481	1.35123	231423	132237	134026	137923	101534	187027	75195.2	T	4	1	0.593376	0.434278	119239	RLDELEEATKNLQR|SLASQLEEIKLQVR|MVDLEKLEEALSR|AIGALSSSQK		0.04775	0	14.0761	0
Q5D862	FLG2	Homo sapiens	Filaggrin-2	2	2	0.330657	0.627021	179791	405383	155389	775967	422852	208965	239978	C	11	1	0.59477	-0.673413	247928	SVVTVIDVFYK|FSNSSSSNEFSK		0.00962	0	12.3614	0
Q9DCU6	Mrpl4	Mus musculus	Large ribosomal subunit protein uL4m	2	2	0.331772	0.916766	192818	230685	199780	220410	258211	232431	196981	T	3	1	0.596392	-0.125375	33052.5	IGLAELHPDVFATAPR|DSAGLLDPVLR		0.09184	0	13.1019	0
Q61189	Clns1a	Mus musculus	Methylosome subunit pICln	2	2	0.331803	0.847669	562086	515009	670678	696253	818728	487047	784257	T	12	1	0.595954	-0.238426	26004.9	GLGTGTLYIAESR|LQQPDTEAVLNGK		0.11017	0	16.2304	0
P23198	Cbx3	Mus musculus	Chromobox protein homolog 3	2	1	0.33193	0.862087	355678	297279	386013	482948	403207	299041	436918	T	4	1	0.595633	-0.214094	20842.3	KVEEAEPEEFVVEK	IIGATDSSGELMFLMK	0.16393	0	14.2057	0
Q8CCS6	Pabpn1	Mus musculus	Polyadenylate-binding protein 2	3	2	0.332066	1.0854	1090431	977415	1.07841e+06	1057732	1.03048e+06	979914	812195	T	36	1	0.59543	0.118221	32276.8	AAAAAAAAAAGAAGGR|TSLALDESLFR	VTILCDKFSGHPK	0.13245	0	21.546	0
Q76MZ3	Ppp2r1a	Mus musculus	Serine/threonine-protein phosphatase 2A 65 kDa regulatory subunit A alpha isoform	23	16	0.333094	1.08176	3.47106e+06	4.47338e+06	4.03929e+06	3576580	3385508	3.93086e+06	3823243	T	101	1	0.596675	0.113382	65280.9	IGPILDNSTLQSEVKPILEK|AAADGDDSLYPIAVLIDELRNEDVQLR|AVGPEITKTDLVPAFQNLMKDCEAEVR|NLCSDDTPMVR|VLAMSGDPNYLHR|LAGGDWFTSR|MAGDPVANVR|HMLPTVLR|AISHEHSPSDLEAHFVPLVK|RLAGGDWFTSR|AISHEHSPSDLEAHFVPLVKR|ELVSDANQHVK|VLELDNVK|LTQDQDVDVK|AVGPEITK|NLCSDDTPMVRR	LSTIALALGVER|KLSTIALALGVER|YMVADKFTELQK|TSACGLFSVCYPR|LNIISNLDCVNEVIGIR|DKAVESLR|NEDVQLR	0.40747	0	21.2467	0
Q9CVB6	Arpc2	Mus musculus	Actin-related protein 2/3 complex subunit 2	6	6	0.333157	0.922834	1.05181e+06	1.39499e+06	1166215	1.29299e+06	1.32613e+06	1.21109e+06	1.35891e+06	T	32	1	0.596362	-0.115856	34335.5	YFQFQEEGKEGENR|NCFASVFEK|IIEETLALK|MILLEVNNR|DNTINLIHTFR|VFMQEFK		0.19667	0	16.18	0
Q9D7N3	Mrps9	Mus musculus	Small ribosomal subunit protein uS9m	5	5	0.33319	1.30376	833758	727798	869034	433261	439689	965347	801831	T	14	1	0.595888	0.382677	44900.8	ATQWGEDGRPFHFLFYTGK|SATAQAVVYEHGSGK|QESYTEDFIKK|QIEEFNIGKR|HRGPLSASAESR		0.17179	0	10.1356	0
Q9WUA3	Pfkp	Mus musculus	ATP-dependent 6-phosphofructokinase, platelet type	25	21	0.333719	1.17724	3532818	5958798	4494388	4.53056e+06	3.21994e+06	4.09162e+06	3760495	T	130	1	0.5962	0.235409	85400.3	IIEVVDAIMTTAQSHQR|SNCNVAVINVGAPAAGMNAAVR|LGITNLCVIGGDGSLTGANLFRK|NVLGHMQQGGAPSPFDR|EIGWADVGGWTGQGGSILGTKR|NVLGHMQQGGAPSPFDRNFGTK|KEWSGLLEELAR|RFEGNLNTYKR|YLEHLSGDGK|YEASYDMSDSGKLESLQHHEEL|DLLFQPVAELKK|VTILGHVQR|NGDIDNDTVQK|EWSGLLEELAR|NLGFDTR|AMEWISAK|DLLFQPVAELK|FVSDDSICVLGICKR|MGVEAVIALLEATPETPACVVSLR|FEGNLNTYKR|MGIYTGAK	AIGVLTSGGDAQGMNAAVR|TFVLEVMGR|IPKEQWWLK|GGTPSAFDR	0.38265	0	20.2727	0
Q5SW19	Cluh	Mus musculus	Clustered mitochondria protein homolog	13	13	0.334063	1.11776	991502	1.02959e+06	1.13912e+06	864933	805770	1.18045e+06	952209	T	32	1	0.596372	0.160611	147975	SVEGLQEGSVLR|AVGSISSTAFDIR|VVEEPYTVR|LGYEEHIPGQTR|HKPAFTEEDVLNIFPVVK|LAALQLMQQK|HYILDLLR|YLELLER|TMNEIYR|TCFSLHLDGNMLDHFSELR|VHSDFTAAATR|VLDLVLR|AVLMSER		0.10646	0	14.249	0
Q8BMK4	Ckap4	Mus musculus	Cytoskeleton-associated protein 4	21	21	0.334364	0.832007	5473728	3334711	5760253	5.78122e+06	6952320	5347939	4818012	T	159	1	0.596466	-0.265333	63653.6	LAMLQEHVGNLGSSSDLASTVR|VGAHGSEEGAVFKDSK|TAVDSLVAYSVK|SLGETQLALSSDLKELK|QRDELGQGLQGVEQK|IETNENNLESAK|LALQALTEK|RLEEELQQLK|ERDFTSLENTVEER|SSVSQVESDLK|ELVSLKQEQQAFK|LQNEILKDLSDGIHVVKDAR|SINDNIAIFTDVQKR|LQNEILKDLSDGIHVVK|SEESSSRLPEDIR|AVKEGESELNR|LSSLDNLK|EVQASMMSR|ISEVLQK|QIEGLGAR|VASLEESKGDR		0.44	0	23.4189	0
P62317	Snrpd2	Mus musculus	Small nuclear ribonucleoprotein Sm D2	9	9	0.334573	0.895073	1.62536e+06	1.67647e+06	1.7749e+06	2.29661e+06	2.071e+06	1.66853e+06	1.60568e+06	T	58	1	0.596108	-0.159923	13518.2	HCNMVLENVK|SEMTPEELQKREEEEFNTGPLSVLTQSVK|NNTQVLINCR|MFLRGDSVIVVLR|GDSVIVVLR|SEMTPEELQK|SLLNKPK|SEMTPEELQKR|EMWTEVPK		0.65254	0	17.1467	0
P54823	Ddx6	Mus musculus	Probable ATP-dependent RNA helicase DDX6	11	11	0.335548	1.18719	1215795	1.94815e+06	1.34477e+06	1.4921e+06	995344	1.3787e+06	1152171	T	40	1	0.597336	0.247555	54157.3	FGHLGLAINLITYDDRFNLK|SIEEQLGTEIKPIPSNIDK|SGAYLIPLLER|TSDVTSTKGNEFEDYCLKR|LDDTVHVVIATPGR|QILLYSATFPLSVQK|FMNSHLQKPYEINLMEELTLK|GVTQYYAYVTER|NLVCTDLFTR|SLYVAEYHSEPAEDEKP|GNEFEDYCLKR		0.32712	0	18.1721	0
Q9D0N7	Chaf1b	Mus musculus	Chromatin assembly factor 1 subunit B	1	1	0.335792	1.67953	57458.3	135359	81529.7	76956.4	16760.8	74150.8	71581.6	T	2	1	0.597282	0.748058	63092.7	AIVEFLSNLAR		0.01923	0	13.3921	0
Q9CZ91	Srfbp1	Mus musculus	Serum response factor-binding protein 1	2	2	0.335884	1.213	259853	196955	252979	195084	168074	285376	150080	T	4	1	0.596946	0.27858	48716.1	GAGVNSEHQGAPAPGDSNQGK|KGTEDALLK		0.06803	0	12.3225	0
O89086	Rbm3	Mus musculus	RNA-binding protein 3	7	5	0.336118	0.755806	1.40943e+06	1.36687e+06	1.40873e+06	2.18607e+06	3.11599e+06	1.52849e+06	1.11421e+06	T	78	1	0.596778	-0.403913	16594.7	YDSRPGGYGYGYGR|SRGFGFITFTNPEHASDAMR|SRDYSGSQGGYDR|AMNGESLDGR|DYSGSQGGYDR	GFGFITFTNPEHASDAMR|SYSRGGGDQGYGSGR	0.47059	0	20.3048	0
Q9D2V5	Aar2	Mus musculus	Protein AAR2 homolog	2	2	0.337512	1.25712	184053	125047	163165	119364	181274	131815	81942.7	T	3	1	0.598808	0.330123	43379.9	VGQNLPLCGTECR|SYQEGLAR		0.05469	0.000503778	9.19958	4.14662e-05
Q99PV0	Prpf8	Mus musculus	Pre-mRNA-processing-splicing factor 8	44	44	0.337608	1.2066	4.30339e+06	7.72838e+06	7.49423e+06	5047640	4396862	5900286	5651164	T	116	1	0.598413	0.270953	273443	LNQSQREELGLIEQAYDNPHEALSR|ELGGLGMLSMGHVLIPQSDLR|TVNKHGDEIITSTTSNYETQTFSSK|RLTLEDLEDSWDRGIPR|TNHIYVSSDDIKETGYTYILPK|YIQPWESEFIDSQR|TAEEVAALIR|HTLAYDKGWR|YLTEHPDPNNENIVGYNNKK|LIVDHNIADYMTAK|EQSQLTATQTR|ANPALYVLR|TSYEEFTHKDGVWNLQNEVTKER|LYLKAEQER|KWQQLQAK|LTPSGYEWGR|LVVDSHVQYR|AGVFPYRGPGNPVPGPLAPLPDYMSEEKLQEK|ITDAYLDQYLWYEADKRR|ASGFEESMK|ALDIPLVK|SLPVEEQPK|VWAEYALK|FGDLILK|WKTAEEVAALIR|TAQCFLR|LLILA…		0.2227	0	17.227	0
O35887	Calu	Mus musculus	Calumenin	1	1	0.338265	0.811378	311968	346564	299665	365341	577340	262878	429795	T	7	1	0.598849	-0.301555	37040.5	SFDQLTPEESKER		0.04127	0	11.0945	0
Q80TE0	Rpap1	Mus musculus	RNA polymerase II-associated protein 1	7	7	0.338694	1.13142	1.08703e+06	761969	860880	799893	735432	944108	699966	T	14	1	0.599017	0.178129	155172	SKVAEQEVQTIHEENVAR|GLLATNLLPR|SIFAQEIAAR|AGYSLQELFHLTR|LNRHDQHITAVLSK|FQSQFLEAGAAPAVQLVK|SCYLAHCSPAR		0.06671	0	18.3112	0
Q8QZY1	Eif3l	Mus musculus	Eukaryotic translation initiation factor 3 subunit L	22	21	0.339241	1.17899	5.31875e+06	9182472	7092581	5.90956e+06	4920916	6828523	6340565	T	156	1	0.599271	0.237553	66570.3	TVSDLIDQKVYELQASR|VYEIQDIYENSWTK|SNPKVWNVHSVLNVLHSLVDKSNINR|VFSDEVQQQAQLSTIR|FLSPVVPNYDNVHPNYHKEPFLQQLK|LAGFLDLTEQEFR|MQKGDPQVYEELFSYACPK|RYGDFFIR|VLENIELNKK|VSGGPSLEQR|VSSDVIDQK|VYELQASR|LYTTMPVAK|SEGEMDFLR|IDESIHLQLR|TVSDLIDQK|YGDFFIR|QDLAYER|NFIQYFHK|QIHKFEELNR|IQLLVFK	KSEGEMDFLR	0.40603	0	17.2115	0
Q8BU88	Mrpl22	Mus musculus	Large ribosomal subunit protein uL22m	1	1	0.339853	1.13807	75886.5	114001	73632.1	73892.8	80091.9	70592	78204	T	7	1	0.599854	0.186592	23789.6	SNLHIAESTSGR		0.05825	0.000503778	9.0541	4.14662e-05
Q8BG51	Rhot1	Mus musculus	Mitochondrial Rho GTPase 1	2	2	0.340576	1.19554	221893	290457	231968	194163	242920	261410	146214	T	5	1	0.6006	0.257667	72195.6	TGVLQSLLGR|ILLVGEPR		0.02853	0	12.4301	0
Q9R0L7	Akap8l	Mus musculus	A-kinase anchor protein 8-like	1	1	0.340649	0.684515	58974	34052.9	36401	116237	62029.5	64744.1	29823.9	T	5	1	0.600256	-0.546847	71408.5	SGRPMASGYGR		0.01713	0	10.1071	0
P42932	Cct8	Mus musculus	T-complex protein 1 subunit theta	36	36	0.340715	0.953095	13072535	14906667	13341543	14044535	15464612	14504422	13752168	T	226	1	0.599796	-0.0693088	59517.5	TAEELMNFSKGEENLMDAQVK|AIAGTGANVIVTGGK|FAEAFEAIPR|IAVYSCPFDGMITETK|NLRDVDEVSSLLR|AHEILPELVCCSAK|HFSGLEEAVYR|APGFAQMLK|LVPGGGATEIELAK|LFVTNDAATILR|GSTDNLMDDIER|LATNAAVTVLR|QITSYGETCPGLEQYAIKK|ILGSGIYSSSVLHGMVFKK|GSTDNLMDDIERAVDDGVNTFK|LTPPVQEEMGHCDSVYLSEVGDTQVVVFKHEKEDGAISTIVLR|ELEVQHPAAK|NIQACKELAQTTR|LIAQACVSIFPDSGNFNVDNIR|TAYGPNGMNK|ALHVPKAPGFAQMLKDGAK|DVDEVSSLLR|APGFAQMLKDGAK|ETEGDVTSVKDAK|AVDD…		0.7281	0	21.3211	0
P35486	Pdha1	Mus musculus	Pyruvate dehydrogenase E1 component subunit alpha, somatic form, mitochondrial	12	12	0.341107	0.92393	1.8897e+06	1693571	1.88955e+06	1.81413e+06	2341984	1.89542e+06	1.87741e+06	T	77	1	0.600076	-0.114144	43203.6	LPCIFICENNR|SGKGPILMELQTYR|SKSDPIMLLKDR|FANDATFEIKK|AILAELTGR|TREEIQEVR|MVNSNLASVEELKEIDVEVRK|RGDFIPGLRVDGMDILCVR|AAASTDYYKR|GANQWIK|YHGHSMSDPGVSYR|FAAAYCR		0.36667	0	13.2055	0
P02662	CSN1S1	Bos taurus	Alpha-S1-casein	2	2	0.34111	0.496332	95537.5	581226	41734.1	297212	269175	332480	189988	C	11	1	0.599558	-1.01062	24513.4	YLGYLEQLLR|HIQKEDVPSER		0.09813	0	12.3434	0
Q8BTU1	Cfap20	Mus musculus	Cilia- and flagella-associated protein 20	1	1	0.341161	1.64701	88459.5	211087	46681.4	41915.7	108471	70534.6	35284.5	T	2	1	0.599144	0.719851	22733.9	LYLPVQNK		0.04145	0.00196464	8.42506	7.70852e-05
Q9WV70	Noc2l	Mus musculus	Nucleolar complex protein 2 homolog	4	4	0.341337	0.90944	331956	376777	375973	440309	339316	366378	453288	T	11	1	0.598879	-0.13695	85370.7	LFHEVVQAFR|LKDRDPEFYK|SKKNEPVPVTLAMVER|FLQENDR		0.05756	0	10.177	0
[truncated: 932 more rows]
