# Supplementary material for: Reciprocal, methylation-dependent binding of Zfp57 and Gzf1 safeguards Dlk1-Dio3 imprinting during developmental reprogramming
Source: Research Square preprint supplement (doi:10.21203/rs.3.rs-7243168/v1), 2025-09-22
Supplement: Supplementary file 5 [file 6b88306b7ca350743a860787.xlsx]

## Sheet: PP1n2VsUS1n2.sgrna_summary
sgrna	Gene	control_count	treatment_count	control_mean	treat_mean	LFC	control_var	adj_var	score	p.low	p.high	p.twosided	FDR	high_in_treatment
Dnmt1_4354	Dnmt1	473.1/573.36	5.4401e+06/8.8619e+06	523.23	7151000	13.736	5025.5	8625	76994	1	0	0	0	TRUE
37316_56349	2002-03-01	532.62/661.57	3.4051e+06/6.8131e+06	597.09	5109100	13.06	8313.7	10183	50624	1	0	0	0	TRUE
Dnmt1_4357	Dnmt1	122.06/71.407	1.2329e+06/1.5777e+06	96.733	1405300	13.812	1282.8	1040.2	43569	1	0	0	0	TRUE
Uhrf1_11811	Uhrf1	222.93/259.38	1.4871e+06/3.2922e+06	241.16	2389700	13.269	664.03	3261.7	41838	1	0	0	0	TRUE
Cd207_63708	Cd207	94.823/93.46	99.919/2.4841e+06	94.141	1242100	13.672	0.92891	1005.6	39166	1	0	0	0	TRUE
1700029J07Rik_34479	1700029J07Rik	336.92/222.62	2.184e+06/2.6781e+06	279.77	2431000	13.08	6532.3	3929.4	38777	1	0	0	0	TRUE
Mycbpap_47862	Mycbpap	10.088/6.3006	4.0721e+05/1.3201e+05	8.1941	269610	14.84	7.1702	48.853	38572	1	0	0	0	TRUE
Ddah2_22272	Ddah2	318.77/388.54	1.8904e+06/3.2387e+06	353.65	2564600	12.82	2434.2	5272.8	35313	1	0	0	0	TRUE
Ift57_39881	Ift57	122.06/87.159	7.5498e+05/1.6172e+06	104.61	1186100	13.455	609	1147	35018	1	0	0	0	TRUE
Uhrf1_11812	Uhrf1	127.1/69.307	4.9021e+05/1.6879e+06	98.205	1089000	13.422	1670.2	1060	33446	1	0	0	0	TRUE
Olfr959_65463	Olfr959	74.648/148.07	9.4849e+05/1.3598e+06	111.36	1154100	13.326	2695.1	1240.2	32770	1	0	0	0	TRUE
Prl2b1_28242	Prl2b1	138.2/179.57	1.3014e+06/1.5751e+06	158.88	1438200	13.135	855.72	1934.1	32700	1	0	0	0	TRUE
Uhrf1_11814	Uhrf1	449.9/500.9	1.6869e+06/4.0312e+06	475.4	2859100	12.551	1300.4	7645.9	32692	1	0	0	0	TRUE
Aass_21818	Aass	136.18/117.61	7.195e+05/1.7499e+06	126.9	1234700	13.237	172.41	1460.1	32309	1	0	0	0	TRUE
Uhrf1_11813	Uhrf1	178.55/135.46	7.2257e+05/1.9207e+06	157.01	1321600	13.03	928.16	1905.6	30273	1	0	0	0	TRUE
Prr23a_75629	Prr23a	550.78/409.54	1.277e+06/3.9005e+06	480.16	2588700	12.393	9973.8	7742.2	29415	1	0	0	0	TRUE
Tcf25_29310	Tcf25	36.315/34.654	2.3966e+05/7.7673e+05	35.484	508190	13.766	1.3803	298.49	29413	1	0	0	0	TRUE
Slc7a8_22236	Slc7a8	43.376/36.754	4.3304e+05/6.318e+05	40.065	532420	13.662	21.929	347.06	28577	1	0	0	0	TRUE
Zdhhc6_29647	Zdhhc6	298.59/298.23	8.5247e+05/2.7645e+06	298.41	1808500	12.56	0.064708	4260.6	27702	1	0	0	0	TRUE
Gbx2_6221	Gbx2	83.726/91.359	5.4953e+05/1.0596e+06	87.543	804560	13.15	29.132	918.4	26546	1	0	0	0	TRUE
Rnf151_30925	Rnf151	140.22/79.808	4.2784e+05/1.3586e+06	110.01	893200	12.974	1824.6	1221.5	25553	1	0	0	0	TRUE
Dsc2_4476	Dsc2	109.95/100.81	5.9658e+05/1.1227e+06	105.38	859620	12.98	41.802	1157.6	25262	1	0	0	0	TRUE
Plbd2_37236	Plbd2	144.25/196.37	8.5943e+05/1.4282e+06	170.31	1143800	12.705	1358.2	2109.7	24899	1	0	0	0	TRUE
Wsb2_26483	Wsb2	0/3.1503	1.0838e+05/15799	1.5752	62090	14.557	4.9623	6.5515	24257	1	0	0	0	TRUE
Faf1_5349	Faf1	2.0175/3.1503	44275/1.1607e+05	2.5839	80173	14.449	0.64164	11.932	23209	1	0	0	0	TRUE
Dnmt1_4355	Dnmt1	8.07/8.4009	23618/2.9875e+05	8.2354	161180	14.091	0.054732	49.156	22989	1	0	0	0	TRUE
Basp1_35624	Basp1	303.63/515.6	8.2025e+05/2.7823e+06	409.62	1801300	12.099	22465	6341	22615	1	0	0	0	TRUE
Pik3ap1_45268	Pik3ap1	0/1.0501	19731/39139	0.52505	29435	14.236	0.55136	1.753	22232	1	0	0	0	TRUE
Grb2_6870	Grb2	19.166/14.702	2.0958e+05/2.7496e+05	16.934	242270	13.722	9.9671	119.43	22167	1	0	0	0	TRUE
Csn2_3616	Csn2	1.0088/0	47598/6867.4	0.50438	27233	14.144	0.50879	1.671	21067	1	0	0	0	TRUE
Mmadhc_49349	Mmadhc	118.02/88.209	2.3805e+05/1.1755e+06	103.12	706790	12.729	444.46	1126.6	21054	1	0	0	0	TRUE
Dnmt1_4356	Dnmt1	223.94/182.72	6.5264e+05/1.5073e+06	203.33	1080000	12.368	849.71	2633.9	21039	1	0	0	0	TRUE
Tcf23_35082	Tcf23	225.96/139.66	1.0321e+06/9.3948e+05	182.81	985790	12.389	3723.5	2305.4	20527	1	0	0	0	TRUE
40787_22517	2011-09-01	35.306/26.253	1.064e+05/5.4297e+05	30.779	324680	13.319	40.984	250.2	20525	1	0	0	0	TRUE
Sphk2_25132	Sphk2	0/2.1002	9965.6/70469	1.0501	40217	14.26	2.2055	4.0191	20060	1	0	0	0	TRUE
Klf9_9324	Klf9	25.219/31.503	4.1243e+05/1.9045e+05	28.361	301440	13.326	19.747	226.06	20047	1	0	0	0	TRUE
Hdac6_7444	Hdac6	161.4/65.107	1.8898e+05/1.1895e+06	113.25	689230	12.559	4636.2	1266.6	19363	1	0	0	0	TRUE
Prr14_59929	Prr14	126.09/86.109	3.5538e+05/9.2718e+05	106.1	641280	12.548	799.4	1167.5	18765	1	0	0	0	TRUE
4930503B20Rik_41330	4930503B20Rik	98.858/107.11	1.278e+05/1.1276e+06	102.98	627700	12.559	34.059	1124.8	18713	1	0	0	0	TRUE
Scai_69988	Scai	9.0788/14.702	70664/2.5791e+05	11.89	164290	13.638	15.808	77.22	18694	1	0	0	0	TRUE
Zbtb46_38085	Zbtb46	30.263/30.453	1.128e+05/4.7255e+05	30.358	292670	13.188	0.018162	245.96	18660	1	0	0	0	TRUE
Zglp1_77080	Zglp1	148.29/115.51	3.7632e+05/1.0814e+06	131.9	728840	12.421	537.09	1532.4	18615	1	0	0	0	TRUE
Sult1e1_16788	Sult1e1	49.429/33.603	2.6373e+05/4.321e+05	41.516	347920	12.998	125.22	362.75	18265	1	0	0	0	TRUE
Rgs12_37144	Rgs12	99.866/61.956	1.6258e+05/8.9092e+05	80.911	526750	12.651	718.58	832.44	18254	1	0	0	0	TRUE
Opalin_56854	Opalin	13.114/8.4009	1.123e+05/1.8919e+05	10.757	150740	13.646	11.106	68.265	18244	1	0	0	0	TRUE
Zfp57_19213	Zfp57	147.28/93.46	5.463e+05/7.976e+05	120.37	671950	12.435	1448.2	1366.8	18172	1	0	0	0	TRUE
Cdh1_2574	Cdh1	0/3.1503	0/92687	1.5752	46343	14.135	4.9623	6.5515	18105	1	0	0	0	TRUE
Gabrb2_6045	Gabrb2	29.254/32.553	1.3667e+05/4.3071e+05	30.904	283690	13.118	5.4435	251.45	17888	1	0	0	0	TRUE
Adgrg3_23813	Adgrg3	1.0088/2.1002	23754/66115	1.5545	44935	14.103	0.59565	6.4478	17695	1	0	0	0	TRUE
Pf4_25302	Pf4	49.429/28.353	2.0143e+05/4.4422e+05	38.891	322820	12.982	222.1	334.47	17650	1	0	0	0	TRUE
Prorsd1_31944	Prorsd1	0/1.0501	39105/7630.4	0.52505	23368	13.903	0.55136	1.753	17649	1	0	0	0	TRUE
Gm3336_78349	Gm3336	41.359/29.403	2.4496e+05/3.6321e+05	35.381	304080	13.029	71.47	297.41	17630	1	0	0	0	TRUE
Fam26d_68652	Fam26d	262.28/215.27	7.0025e+05/1.2801e+06	238.77	990160	12.012	1104.7	3221.4	17441	1	0	0	0	TRUE
Nfib_11556	Nfib	71.621/121.81	2.6784e+05/8.5272e+05	96.717	560280	12.485	1259.6	1040	17370	1	0	0	0	TRUE
Amdhd2_63551	Amdhd2	57.499/47.255	2.7423e+05/4.8884e+05	52.377	381530	12.803	52.469	484.26	17335	1	0	0	0	TRUE
Neil1_38866	Neil1	204.78/70.357	4.3919e+05/9.5016e+05	137.57	694680	12.292	9034.3	1615.2	17282	1	0	0	0	TRUE
Olfr1471_64515	Olfr1471	101.88/56.706	2.351e+05/7.0137e+05	79.295	468230	12.51	1020.5	811.75	16431	1	0	0	0	TRUE
Prelid2_43706	Prelid2	14.123/28.353	2.4425e+05/1.6791e+05	21.238	206080	13.178	101.25	158.01	16393	1	0	0	0	TRUE
Cnnm1_45346	Cnnm1	61.534/77.708	2.4718e+05/6.1366e+05	69.621	430420	12.573	130.8	690.21	16381	1	0	0	0	TRUE
Ahr_515	Ahr	70.613/106.06	2.1718e+05/7.7404e+05	88.337	495610	12.438	628.29	928.8	16259	1	0	0	0	TRUE
Gm15127_74423	Gm15127	15.131/11.551	30055/2.7218e+05	13.341	151120	13.363	6.4085	88.992	16018	1	0	0	0	TRUE
Rara_14450	Rara	23.201/10.501	67792/2.8017e+05	16.851	173980	13.251	80.648	118.71	15966	1	0	0	0	TRUE
Fzd5_5949	Fzd5	38.333/40.954	70963/5.1635e+05	39.643	293660	12.819	3.4365	342.53	15865	1	0	0	0	TRUE
Slc9a6_60783	Slc9a6	57.499/52.505	2.5651e+05/4.6272e+05	55.002	359610	12.649	12.467	514.65	15850	1	0	0	0	TRUE
Mapkap1_57508	Mapkap1	22.193/29.403	1.2063e+05/3.2869e+05	25.798	224660	13.033	25.996	201.03	15844	1	0	0	0	TRUE
Rpl39l_32435	Rpl39l	38.333/45.155	1.665e+05/4.3623e+05	41.744	301370	12.784	23.27	365.22	15767	1	0	0	0	TRUE
Yipf5_30168	Yipf5	57.499/46.205	3.5487e+05/3.3071e+05	51.852	342790	12.663	63.778	478.23	15673	1	0	0	0	TRUE
Mier3_55637	Mier3	43.376/60.906	1.068e+05/5.7969e+05	52.141	343240	12.657	153.65	481.55	15639	1	0	0	0	TRUE
Proz_29440	Proz	48.42/36.754	54209/5.453e+05	42.587	299760	12.748	68.051	374.41	15489	1	0	0	0	TRUE
Xbp1_18940	Xbp1	1.0088/8.4009	1.2624e+05/27739	4.7048	76989	13.72	27.322	24.76	15471	1	0	0	0	TRUE
Papolg_54767	Papolg	18.158/15.752	1.9397e+05/1.4341e+05	16.955	168690	13.198	2.8942	119.62	15422	1	0	0	0	TRUE
Stard3_26492	Stard3	64.56/179.57	2.5989e+05/8.8768e+05	122.06	573790	12.187	6613.5	1390.9	15382	1	0	0	0	TRUE
Gpx1_6849	Gpx1	48.42/51.455	3.095e+05/3.4691e+05	49.938	328200	12.654	4.6063	456.37	15361	1	0	0	0	TRUE
Nt5c3_48638	Nt5c3	110.96/51.455	4.0202e+05/4.6927e+05	81.209	435640	12.372	1770.6	836.26	15062	1	0	0	0	TRUE
Ctsq_47672	Ctsq	32.28/16.802	47482/3.6626e+05	24.541	206870	12.984	119.79	188.97	15047	1	0	0	0	TRUE
1700123I01Rik_75593	1700123I01Rik	15.131/22.052	46694/2.9907e+05	18.592	172880	13.107	23.95	134.04	14931	1	0	0	0	TRUE
Zcchc4_44424	Zcchc4	11.096/11.551	1.3769e+05/1.1351e+05	11.324	125600	13.315	0.10348	72.716	14728	1	0	0	0	TRUE
Bckdk_1468	Bckdk	11.096/13.651	45542/2.1616e+05	12.374	130850	13.256	3.2644	81.108	14528	1	0	0	0	TRUE
B3gnt4_58999	B3gnt4	201.75/189.02	96569/1.3539e+06	195.38	725260	11.851	81.037	2505.6	14485	1	0	0	0	TRUE
Gm7903_76586	Gm7903	65.569/81.908	77164/7.0684e+05	73.739	392000	12.357	133.49	741.46	14393	1	0	0	0	TRUE
Hoxa2_7774	Hoxa2	216.88/92.409	3.2569e+05/9.1098e+05	154.65	618330	11.956	7746.6	1869.8	14296	1	0	0	0	TRUE
Gsr_6862	Gsr	184.6/161.72	2.9506e+05/1.0258e+06	173.16	660450	11.889	261.86	2154	14227	1	0	0	0	TRUE
Fbn1_5410	Fbn1	45.394/70.357	1.1744e+05/5.4692e+05	57.876	332180	12.462	311.59	548.32	14183	1	0	0	0	TRUE
Fxyd1_24211	Fxyd1	72.63/76.658	1.6701e+05/6.0487e+05	74.644	385940	12.317	8.1115	752.82	14063	1	0	0	0	TRUE
Vps51_32954	Vps51	1.0088/1.0501	11627/43089	1.0294	27358	13.719	0.00085518	3.9242	13810	1	0	0	0	TRUE
control_78707	control	110.96/111.31	3.4241e+05/6.23e+05	111.14	482710	12.072	0.060829	1237.1	13721	1	0	0	0	TRUE
Asic3_51389	Asic3	5.0438/4.2004	73861/60370	4.6221	67115	13.543	0.3556	24.23	13634	1	0	0	0	TRUE
Cyp4f18_37899	Cyp4f18	21.184/19.952	94439/2.3318e+05	20.568	163810	12.891	0.75858	151.87	13290	1	0	0	0	TRUE
Gnmt_6695	Gnmt	13.114/10.501	1.3685e+05/93899	11.807	115370	13.137	3.4131	76.559	13184	1	0	0	0	TRUE
Eid2_73248	Eid2	108.95/129.16	4.6041e+05/5.019e+05	119.05	481160	11.969	204.39	1348.2	13101	1	0	0	0	TRUE
Ppp1r37_59502	Ppp1r37	3.0263/0	0/64634	1.5131	32317	13.651	4.5791	6.2412	12935	1	0	0	0	TRUE
Ptbp3_58302	Ptbp3	0/1.0501	0/33978	0.52505	16989	13.444	0.55136	1.753	12831	1	0	0	0	TRUE
Ppm1f_33125	Ppm1f	7.0613/5.2505	29502/1.1984e+05	6.1559	74672	13.349	1.6394	34.401	12730	1	0	0	0	TRUE
Mettl7a1_35430	Mettl7a1	28.245/34.654	72946/3.3511e+05	31.449	204030	12.618	20.535	256.97	12726	1	0	0	0	TRUE
Hoga1_30724	Hoga1	194.69/87.159	3.5251e+05/6.8476e+05	140.92	518640	11.835	5781.4	1664.6	12708	1	0	0	0	TRUE
Olfr215_65241	Olfr215	5.0438/9.451	90774/73027	7.2474	81900	13.278	9.7118	42.02	12633	1	0	0	0	TRUE
Ehmt1_43755	Ehmt1	0/1.0501	0/33125	0.52505	16562	13.407	0.55136	1.753	12509	1	0	0	0	TRUE
Tnrc6a_59878	Tnrc6a	78.683/76.658	1.3922e+05/5.6281e+05	77.67	351010	12.123	2.0498	791.07	12477	1	0	0	0	TRUE
Olfr1406_66385	Olfr1406	180.57/223.67	3.4365e+05/9.3261e+05	202.12	638130	11.617	929.09	2614.2	12477	1	0	0	0	TRUE
Olfr222_64132	Olfr222	50.438/53.556	1.1858e+05/4.2739e+05	51.997	272980	12.331	4.8608	479.89	12459	1	0	0	0	TRUE
Tmem138_39047	Tmem138	42.368/29.403	1.5283e+05/2.7609e+05	35.885	214460	12.505	84.04	302.68	12325	1	0	0	0	TRUE
Gcc1_40655	Gcc1	21.184/14.702	1.4092e+05/1.3717e+05	17.943	139040	12.842	21.01	128.28	12275	1	0	0	0	TRUE
Pdzrn4_61559	Pdzrn4	20.175/21.002	83790/2.1895e+05	20.589	151370	12.776	0.34207	152.06	12273	1	0	0	0	TRUE
Qprt_30594	Qprt	53.464/82.959	1.4503e+05/4.9149e+05	68.211	318260	12.167	434.97	672.84	12267	1	0	0	0	TRUE
Ankrd66_77956	Ankrd66	9.0788/21.002	1.4064e+05/1.0359e+05	15.04	122120	12.894	71.084	103.17	12021	1	0	0	0	TRUE
Suds3_37674	Suds3	28.245/29.403	9986.6/3.5203e+05	28.824	181010	12.567	0.67046	230.65	11917	1	0	0	0	TRUE
Rap2b_39937	Rap2b	2.0175/4.2004	16581/75361	3.109	45971	13.45	2.3826	14.941	11892	1	0	0	0	TRUE
Eno4_56925	Eno4	12.105/21.002	45190/2.11e+05	16.554	128100	12.833	39.58	116.13	11885	1	0	0	0	TRUE
Ncs1_5843	Ncs1	123.07/52.505	1.4374e+05/5.7547e+05	87.787	359600	11.984	2489.5	921.59	11843	1	0	0	0	TRUE
Vmn1r88_78225	Vmn1r88	18.158/14.702	39789/2.1302e+05	16.43	126410	12.824	5.972	115.06	11783	1	0	0	0	TRUE
Ccsap_39443	Ccsap	2.0175/9.451	46452/84024	5.7342	65238	13.242	27.628	31.539	11616	1	0	0	0	TRUE
Lpcat2_68537	Lpcat2	55.481/28.353	45353/3.9252e+05	41.917	218930	12.317	367.98	367.1	11424	1	0	0	0	TRUE
Olfr796_66977	Olfr796	119.03/135.46	1.3505e+05/7.3952e+05	127.25	437280	11.735	134.99	1465.2	11421	1	0	0	0	TRUE
Stc2_16779	Stc2	6.0525/12.601	19810/1.5279e+05	9.3269	86299	13.029	21.443	57.278	11402	1	0	0	0	TRUE
Cyth4_38334	Cyth4	41.359/30.453	1.293e+05/2.6262e+05	35.906	195960	12.374	59.467	302.9	11257	1	0	0	0	TRUE
Ccdc113_63159	Ccdc113	11.096/10.501	47020/1.3883e+05	10.799	92924	12.943	0.17712	68.588	11219	1	0	0	0	TRUE
Olfr654_65005	Olfr654	14.123/36.754	94497/2.1976e+05	25.438	157130	12.537	256.09	197.56	11177	1	0	0	0	TRUE
Arhgef26_75578	Arhgef26	44.385/9.451	1.9036e+05/1.3344e+05	26.918	161900	12.502	610.2	211.9	11120	1	0	0	0	TRUE
Ehmt2_49740	Ehmt2	0/0	20709/7989.5	0.50438	14349	13.22	0	1.671	11100	1	0	0	0	TRUE
Mogat1_32806	Mogat1	6.0525/2.1002	85804/14498	4.0764	50151	13.27	7.8103	20.784	11000	1	0	0	0	TRUE
Ddx19b_60237	Ddx19b	6.0525/13.651	90106/81062	9.852	85584	12.945	28.872	61.267	10933	1	0	0	0	TRUE
Pigw_35601	Pigw	21.184/117.61	2.2486e+05/3.4835e+05	69.398	286610	11.991	4649.2	687.46	10928	1	0	0	0	TRUE
Hint3_29288	Hint3	29.254/40.954	1.2683e+05/2.4722e+05	35.104	187030	12.339	68.45	294.53	10896	1	0	0	0	TRUE
Zfp488_72979	Zfp488	40.35/18.902	92651/2.4238e+05	29.626	167510	12.417	230.01	238.63	10842	1	0	0	0	TRUE
Tex2_17452	Tex2	83.726/34.654	38206/4.7524e+05	59.19	256720	12.058	1204.1	563.87	10809	1	0	0	0	TRUE
Dtnb_4532	Dtnb	20.175/21.002	25932/2.4045e+05	20.589	133190	12.591	0.34207	152.06	10799	1	0	0	0	TRUE
Map3k1_20182	Map3k1	0/0	0/27918	0.50438	13959	13.18	0	1.671	10798	1	0	0	0	TRUE
Atp13a4_56152	Atp13a4	2.0175/10.501	70632/56824	6.2593	63728	13.1	35.986	35.11	10754	1	0	0	0	TRUE
Zeb2_20029	Zeb2	102.89/39.904	55381/5.1523e+05	71.398	285310	11.944	1983.8	712.24	10688	1	0	0	0	TRUE
Naa25_58985	Naa25	7.0613/7.3508	14699/1.2294e+05	7.206	68819	13.034	0.041904	41.727	10653	1	0	0	0	TRUE
Cacna1g_1871	Cacna1g	3.0263/2.1002	16008/57183	2.5632	36596	13.326	0.42877	11.816	10645	1	0	0	0	TRUE
Zfp750_69496	Zfp750	74.648/91.359	2.0442e+05/4.1927e+05	83.003	311840	11.858	139.64	859.37	10635	1	0	0	0	TRUE
Usp49_56432	Usp49	45.394/40.954	2.1909e+05/1.9547e+05	43.174	207280	12.196	9.855	380.83	10619	1	0	0	0	TRUE
Col19a1_3180	Col19a1	71.621/30.453	83579/3.7577e+05	51.037	229680	12.108	847.41	468.9	10604	1	0	0	0	TRUE
Neu2_19703	Neu2	7.0613/2.1002	7262.5/95874	4.5807	51568	13.174	12.306	23.965	10533	1	0	0	0	TRUE
Gm156_59311	Gm156	302.63/432.64	2.1598e+05/1.3388e+06	367.63	777380	11.042	8452.5	5535.8	10443	1	0	0	0	TRUE
Sohlh1_57391	Sohlh1	2558.2/2268.2	1.4624e+06/3.5979e+06	2413.2	2530200	10.033	42038	59200	10389	1	0	0	0	TRUE
Otulin_73961	Otulin	5.0438/6.3006	24517/90398	5.6722	57457	13.072	0.78989	31.122	10298	1	0	0	0	TRUE
4932411N23Rik_60824	4932411N23Rik	52.455/31.503	15529/3.7784e+05	41.979	196680	12.16	219.49	367.78	10254	1	0	0	0	TRUE
Sh2d7_63264	Sh2d7	31.271/21.002	1.513e+05/1.4175e+05	26.137	146520	12.399	52.728	204.3	10249	1	0	0	0	TRUE
Ccdc94_38956	Ccdc94	20.175/18.902	38337/2.0369e+05	19.538	121010	12.525	0.81037	142.53	10135	1	0	0	0	TRUE
S100a2_76007	S100a2	73.639/73.508	43559/5.072e+05	73.573	275380	11.85	0.0086188	739.39	10125	1	0	0	0	TRUE
Amd1_689	Amd1	8.07/13.651	51037/1.1634e+05	10.861	83689	12.785	15.576	69.073	10068	1	0	0	0	TRUE
Itga6_8793	Itga6	100.88/42.004	46015/4.9001e+05	71.44	268010	11.853	1732.9	712.76	10036	1	0	0	0	TRUE
Ido1_8245	Ido1	165.44/96.61	3.2487e+05/4.5558e+05	131.02	390220	11.529	2368.5	1519.7	10007	1	0	0	0	TRUE
4931431F19Rik_36392	4931431F19Rik	30.263/19.952	72094/2.0512e+05	25.107	138610	12.374	53.153	194.38	9939.8	1	0	0	0	TRUE
Olfr677_64925	Olfr677	10.088/14.702	37059/1.4202e+05	12.395	89537	12.707	10.644	81.275	9930.4	1	0	0	0	TRUE
Fbxl17_21959	Fbxl17	24.21/15.752	39752/2.0014e+05	19.981	119950	12.481	35.772	146.53	9907.2	1	0	0	0	TRUE
Gm5615_74300	Gm5615	37.324/22.052	6221.3/2.9961e+05	29.688	152910	12.283	116.61	239.25	9884.1	1	0	0	0	TRUE
Ankrd13a_32829	Ankrd13a	68.595/40.954	1.1846e+05/3.2838e+05	54.775	223420	11.968	382.01	512	9871.3	1	0	0	0	TRUE
Nfatc2ip_11530	Nfatc2ip	37.324/45.155	1.2002e+05/2.5248e+05	41.239	186250	12.106	30.661	359.74	9817.6	1	0	0	0	TRUE
Tlr13_69068	Tlr13	61.534/52.505	3.0446e+05/1.509e+05	57.02	227680	11.938	40.756	538.25	9811.4	1	0	0	0	TRUE
Ano6_48136	Ano6	0/0	0/25270	0.50438	12635	13.036	0	1.671	9773.9	1	0	0	0	TRUE
Tas2r144_73363	Tas2r144	1.0088/1.0501	16455/22173	1.0294	19314	13.216	0.00085518	3.9242	9749.4	1	0	0	0	TRUE
Junb_8972	Junb	5.0438/28.353	34551/1.7496e+05	16.698	104760	12.531	271.66	117.39	9667.2	1	0	0	0	TRUE
Sult2a5_74283	Sult2a5	58.508/8.4009	33194/2.8776e+05	33.454	160470	12.185	1255.3	277.45	9632.2	1	0	0	0	TRUE
Vmn1r126_77826	Vmn1r126	8.07/4.2004	46699/65262	6.1352	55981	12.938	7.4868	34.26	9563.1	1	0	0	0	TRUE
Kif18a_57642	Kif18a	0/1.0501	9870.9/15440	0.52505	12656	13.019	0.55136	1.753	9558.3	1	0	0	0	TRUE
Focad_58328	Focad	34.298/59.856	1.0516e+05/2.8506e+05	47.077	195110	11.987	326.62	424.09	9472.1	1	0	0	0	TRUE
Sgsm3_48172	Sgsm3	44.385/59.856	82491/3.3084e+05	52.121	206670	11.926	119.68	481.32	9417.8	1	0	0	0	TRUE
Wdr53_33745	Wdr53	10.088/2.1002	92977/16742	6.0939	54860	12.917	31.898	33.977	9410.5	1	0	0	0	TRUE
Adamtsl3_68496	Adamtsl3	69.604/35.704	2.8603e+05/1.294e+05	52.654	207720	11.919	574.61	487.45	9405.8	1	0	0	0	TRUE
Nme1_11707	Nme1	1.0088/7.3508	72662/14318	4.1798	43490	13.036	20.111	21.429	9393.9	1	0	0	0	TRUE
Ssxb1_32055	Ssxb1	10.088/12.601	15046/1.4412e+05	11.344	79585	12.654	3.1595	72.879	9321.1	1	0	0	0	TRUE
Uba1y_18371	Uba1y	25.219/21.002	2.0107e+05/44346	23.11	122710	12.313	8.89	175.43	9262.9	1	0	0	0	TRUE
Slc24a4_61236	Slc24a4	70.613/60.906	2.2836e+05/2.4121e+05	65.759	234790	11.78	47.106	642.85	9257.6	1	0	0	0	TRUE
Cystm1_27336	Cystm1	37.324/32.553	89548/2.2707e+05	34.939	158310	12.105	11.379	292.8	9249.6	1	0	0	0	TRUE
Clns1a_2948	Clns1a	5.0438/5.2505	10018/87076	5.1471	48547	12.947	0.02138	27.635	9234	1	0	0	0	TRUE
Pdgfrb_12754	Pdgfrb	34.298/33.603	93524/2.15e+05	33.95	154260	12.108	0.24088	282.56	9174.9	1	0	0	0	TRUE
Nup188_57453	Nup188	285.48/94.51	3.0377e+05/5.8938e+05	189.99	446580	11.191	18234	2419.3	9075.4	1	0	0	0	TRUE
Tyro3_18307	Tyro3	227.98/109.21	3.3322e+05/4.9364e+05	168.59	413430	11.251	7052.7	2083.2	9054.5	1	0	0	0	TRUE
Phox2b_13339	Phox2b	10.088/6.3006	31.553/1.2599e+05	8.1941	63011	12.743	7.1702	48.853	9013.9	1	0	0	0	TRUE
Vmn2r115_76316	Vmn2r115	53.464/58.806	63391/3.4817e+05	56.135	205780	11.814	14.27	527.87	8954.1	1	0	0	0	TRUE
Rbbp8_56534	Rbbp8	59.516/113.41	82196/4.5603e+05	86.464	269110	11.587	1452.4	904.3	8946.2	1	0	0	0	TRUE
Bcl11b_26105	Bcl11b	17.149/14.702	90411/97445	15.925	93928	12.438	2.9945	110.71	8925.3	1	0	0	0	TRUE
Trmt13_58158	Trmt13	57.499/34.654	99051/2.637e+05	46.076	181370	11.912	260.95	412.91	8923.6	1	0	0	0	TRUE
2310035C23Rik_57310	2310035C23Rik	10.088/3.1503	25947/83396	6.6189	54672	12.809	24.062	37.598	8915.1	1	0	0	0	TRUE
Olfr353_67016	Olfr353	43.376/30.453	9229.3/3.0266e+05	36.915	155940	12.006	83.504	313.5	8805.3	1	0	0	0	TRUE
Mpc2_35803	Mpc2	8.07/16.802	23455/1.3497e+05	12.436	79211	12.525	38.121	81.609	8767	1	0	0	0	TRUE
Cyp2j6_3908	Cyp2j6	4.035/7.3508	3413/94123	5.6929	48768	12.831	5.4971	31.26	8721.4	1	0	0	0	TRUE
Zfp770_57658	Zfp770	32.28/35.704	81365/2.0979e+05	33.992	145580	12.022	5.8606	282.99	8651.8	1	0	0	0	TRUE
Gm7325_76366	Gm7325	6.0525/1.0501	5.2589/72489	3.5513	36247	12.959	12.512	17.568	8647.1	1	0	0	0	TRUE
Ppm1e_70087	Ppm1e	51.446/16.802	29176/2.5912e+05	34.124	144150	12.003	600.12	284.36	8546.2	1	0	0	0	TRUE
Ccdc13_78312	Ccdc13	8.07/12.601	0/1.3744e+05	10.336	68718	12.566	10.266	64.988	8523	1	0	0	0	TRUE
Olfr1024_64001	Olfr1024	53.464/30.453	1.6598e+05/1.5786e+05	41.958	161920	11.88	264.75	367.55	8443.6	1	0	0	0	TRUE
Mib1_56530	Mib1	64.56/32.553	2.0482e+05/1.4942e+05	48.557	177120	11.803	512.22	440.73	8434.7	1	0	0	0	TRUE
Gm15293_77605	Gm15293	82.718/61.956	54456/3.9929e+05	72.337	226870	11.595	215.51	723.93	8429.4	1	0	0	0	TRUE
Mark2_4884	Mark2	40.35/45.155	25700/3.0109e+05	42.752	163390	11.867	11.542	376.21	8421.8	1	0	0	0	TRUE
Tmem33_31778	Tmem33	54.473/101.86	68103/4.0589e+05	78.167	237000	11.548	1122.8	797.37	8390.1	1	0	0	0	TRUE
Stk19_23571	Stk19	2.0175/1.0501	15.777/42236	1.5338	21126	13.026	0.46793	6.3443	8386.8	1	0	0	0	TRUE
9130401M01Rik_42150	9130401M01Rik	17.149/12.601	25900/1.4188e+05	14.875	83890	12.368	10.34	101.77	8314.1	1	0	0	0	TRUE
Aldh1a7_20039	Aldh1a7	8.07/12.601	6384.3/1.2725e+05	10.336	66816	12.525	10.266	64.988	8287	1	0	0	0	TRUE
Phykpl_39007	Phykpl	25.219/35.704	18112/2.4099e+05	30.461	129550	12.008	54.966	247	8241.1	1	0	0	0	TRUE
Pgd_49780	Pgd	4.035/6.3006	0/86762	5.1678	43381	12.78	2.5666	27.771	8231.1	1	0	0	0	TRUE
Mup3_11112	Mup3	31.271/28.353	9155.7/2.4323e+05	29.812	126190	12	4.2585	240.49	8135.5	1	0	0	0	TRUE
Bag1_1409	Bag1	73.639/64.057	62418/3.6024e+05	68.848	211330	11.563	45.91	680.68	8097.5	1	0	0	0	TRUE
Acadvl_60	Acadvl	15.131/11.551	24875/1.2779e+05	13.341	76331	12.378	6.4085	88.992	8090	1	0	0	0	TRUE
Nfam1_39985	Nfam1	40.35/37.804	73829/2.2303e+05	39.077	148430	11.855	3.2415	336.46	8089.9	1	0	0	0	TRUE
Jdp2_45112	Jdp2	37.324/59.856	73698/2.6617e+05	48.59	169930	11.743	253.85	441.1	8088.8	1	0	0	0	TRUE
Snf8_21195	Snf8	31.271/29.403	1.0401e+05/1.4942e+05	30.337	126720	11.981	1.7452	245.75	8081.3	1	0	0	0	TRUE
Slc25a13_22097	Slc25a13	24.21/24.152	7709.5/2.1159e+05	24.181	109650	12.088	0.001656	185.55	8047.8	1	0	0	0	TRUE
St3gal5_15815	St3gal5	55.481/74.558	1.6976e+05/2.3448e+05	65.019	202120	11.58	181.95	633.85	8025.6	1	0	0	0	TRUE
Sstr1_16193	Sstr1	99.866/71.407	1.3526e+05/3.4444e+05	85.637	239850	11.435	404.96	893.52	8021.1	1	0	0	0	TRUE
Prrx1_13337	Prrx1	63.551/133.36	88186/4.3341e+05	98.458	260800	11.357	2436.9	1063.4	7994.3	1	0	0	0	TRUE
Avp_1365	Avp	16.14/28.353	42891/1.6253e+05	22.246	102710	12.109	74.577	167.35	7937.9	1	0	0	0	TRUE
Zfp426_60335	Zfp426	4.035/30.453	54214/1.2074e+05	17.244	87477	12.227	348.96	122.14	7913.6	1	0	0	0	TRUE
Sf3b5_27521	Sf3b5	0/1.0501	2408.6/18313	0.52505	10361	12.73	0.55136	1.753	7825	1	0	0	0	TRUE
Fgf10_5516	Fgf10	2.0175/4.2004	0/60415	3.109	30207	12.844	2.3826	14.941	7814.2	1	0	0	0	TRUE
Mdh1b_43003	Mdh1b	94.823/38.854	1.0892e+05/2.9148e+05	66.838	200200	11.527	1566.2	656.01	7813.9	1	0	0	0	TRUE
Pcolce2_42772	Pcolce2	133.16/199.52	1.1215e+05/5.9539e+05	166.34	353770	11.046	2202.2	2048.3	7813	1	0	0	0	TRUE
Hnf4a_7731	Hnf4a	10.088/6.3006	56307/52695	8.1941	54501	12.533	7.1702	48.853	7796.3	1	0	0	0	TRUE
Tex26_42269	Tex26	112.98/106.06	72189/4.7039e+05	109.52	271290	11.261	23.938	1214.7	7780.8	1	0	0	0	TRUE
Susd5_72847	Susd5	13.114/40.954	69596/1.566e+05	27.034	113100	11.978	387.55	213.03	7747.1	1	0	0	0	TRUE
Prss45_67746	Prss45	0/0	20026/0	0.50438	10013	12.701	0	1.671	7745.5	1	0	0	0	TRUE
Bex6_70706	Bex6	159.38/268.83	2.494e+05/5.7093e+05	214.11	410170	10.897	5989.1	2809.9	7733.7	1	0	0	0	TRUE
Zbtb12_51962	Zbtb12	59.516/39.904	66977/2.6204e+05	49.71	164510	11.664	192.32	453.78	7720.2	1	0	0	0	TRUE
Csnk1g3_35759	Csnk1g3	16.14/6.3006	8919.1/1.215e+05	11.22	65211	12.382	48.407	71.899	7689.2	1	0	0	0	TRUE
Dmbt1_3486	Dmbt1	24.21/22.052	1.2715e+05/76483	23.131	101820	12.043	2.328	175.62	7681.2	1	0	0	0	TRUE
E130012A19Rik_47548	E130012A19Rik	14.123/4.2004	4617.3/1.1015e+05	9.1615	57382	12.463	49.224	56.031	7664.6	1	0	0	0	TRUE
Irak1bp1_27148	Irak1bp1	77.674/77.708	52300/3.7636e+05	77.691	214330	11.411	0.00058257	791.33	7616.3	1	0	0	0	TRUE
Prss12_13793	Prss12	24.21/16.802	14557/1.7218e+05	20.506	93367	12.084	27.441	151.31	7588.8	1	0	0	0	TRUE
Olfr170_67071	Olfr170	9.0788/13.651	17212/1.1203e+05	11.365	64622	12.352	10.455	73.043	7559.9	1	0	0	0	TRUE
3110001I22Rik_28741	3110001I22Rik	14.123/9.451	37853/94078	11.787	65966	12.333	10.912	76.394	7545.9	1	0	0	0	TRUE
control_79167	control	65.569/95.56	2.1463e+05/2.1482e+05	80.564	214720	11.362	449.73	827.99	7459.3	1	0	0	0	TRUE
Igf2r_8384	Igf2r	74.648/38.854	1.246e+05/2.1639e+05	56.751	170500	11.528	640.59	535.09	7368.1	1	0	0	0	TRUE
Hnrnpc_7741	Hnrnpc	4.035/5.2505	11075/61537	4.6428	36306	12.652	0.73876	24.362	7354.7	1	0	0	0	TRUE
Deptor_46391	Deptor	129.12/78.758	1.3938e+05/3.5275e+05	103.94	246060	11.195	1268.2	1137.9	7291.4	1	0	0	0	TRUE
Tcf23_35081	Tcf23	0/0	18769/0	0.50438	9384.5	12.607	0	1.671	7259.3	1	0	0	0	TRUE
Trim40_52104	Trim40	3.0263/0	0/35997	1.5131	17999	12.806	4.5791	6.2412	7204	1	0	0	0	TRUE
Stfa2_16796	Stfa2	5.0438/3.1503	0/65891	4.097	32945	12.658	1.7925	20.913	7203.3	1	0	0	0	TRUE
Ugt1a7c_73399	Ugt1a7c	34.298/85.059	1.3454e+05/2.0261e+05	59.678	168580	11.44	1288.3	569.67	7060.5	1	0	0	0	TRUE
Olfr1420_65114	Olfr1420	9.0788/18.902	63780/73297	13.99	68538	12.159	48.247	94.361	7054.2	1	0	0	0	TRUE
Tsc2_18139	Tsc2	388.37/432.64	4.1187e+05/7.1156e+05	410.51	561710	10.415	980.15	6358.3	7039.2	1	0	0	0	TRUE
control_79287	control	23.201/29.403	42234/1.5983e+05	26.302	101030	11.854	19.231	205.91	7039.1	1	0	0	0	TRUE
Nphp3_39970	Nphp3	1.0088/0	0/18178	0.50438	9089.1	12.561	0.50879	1.671	7030.9	1	0	0	0	TRUE
Olfr545_66670	Olfr545	51.446/71.407	1.1046e+05/2.3062e+05	61.427	170540	11.416	199.22	590.53	7015.4	1	0	0	0	TRUE
Zkscan5_19260	Zkscan5	14.123/13.651	48976/86717	13.887	67847	12.154	0.11097	93.502	7015	1	0	0	0	TRUE
Tgtp2_77301	Tgtp2	20.175/22.052	16839/1.5804e+05	21.114	87439	11.949	1.762	156.87	6979.6	1	0	0	0	TRUE
Hgh1_26519	Hgh1	6.0525/1.0501	0/57811	3.5513	28906	12.633	12.512	17.568	6895.6	1	0	0	0	TRUE
Ppfibp1_30986	Ppfibp1	70.613/239.42	1.2304e+05/4.7053e+05	155.02	296780	10.893	14249	1875.4	6849.5	1	0	0	0	TRUE
Xkr4_74701	Xkr4	9.0788/7.3508	25527/70289	8.2148	47908	12.344	1.493	49.005	6842.5	1	0	0	0	TRUE
Olfr916_66464	Olfr916	8.07/9.451	23981/75406	8.7605	49693	12.314	0.95353	53.033	6822.6	1	0	0	0	TRUE
Rap2c_37924	Rap2c	10.088/23.102	26536/1.2056e+05	16.595	73548	12.029	84.693	116.49	6812.9	1	0	0	0	TRUE
Sap30l_21945	Sap30l	50.438/82.959	1.5947e+05/1.8896e+05	66.698	174220	11.329	528.81	654.3	6808.3	1	0	0	0	TRUE
Vmn1r82_51570	Vmn1r82	45.394/127.06	1.1748e+05/2.9108e+05	86.228	204280	11.193	3334.9	901.22	6801.8	1	0	0	0	TRUE
Pvrl3_26340	Pvrl3	21.184/12.601	0/1.4825e+05	16.893	74127	12.016	36.83	119.07	6791.5	1	0	0	0	TRUE
Cilp_54044	Cilp	33.289/59.856	36376/2.4063e+05	46.572	138500	11.507	352.91	418.44	6768.4	1	0	0	0	TRUE
Smo_69637	Smo	91.796/53.556	35350/3.2972e+05	72.676	182540	11.275	731.18	728.16	6761.8	1	0	0	0	TRUE
Sall1_26078	Sall1	23.201/25.203	12658/1.7106e+05	24.202	91857	11.832	2.0026	185.74	6738.1	1	0	0	0	TRUE
Esp6_74000	Esp6	0/1.0501	5.2589/17774	0.52505	8889.8	12.509	0.55136	1.753	6714	1	0	0	0	TRUE
Nxpe4_63239	Nxpe4	84.735/64.057	12017/3.5576e+05	74.396	183890	11.252	213.8	749.71	6713.2	1	0	0	0	TRUE
Ninj2_21522	Ninj2	30.263/29.403	21.036/2.0782e+05	29.833	103920	11.719	0.36939	240.69	6696.3	1	0	0	0	TRUE
Ap1s1_806	Ap1s1	94.823/84.009	71237/3.3969e+05	89.416	205460	11.15	58.471	942.97	6687.9	1	0	0	0	TRUE
Prn_50105	Prn	52.455/100.81	46804/3.2492e+05	76.633	185860	11.225	1169.1	777.91	6661.1	1	0	0	0	TRUE
AK010878_78173	AK010878	1.0088/0	4380.7/12792	0.50438	8586.4	12.479	0.50879	1.671	6641.9	1	0	0	0	TRUE
Pyroxd2_40990	Pyroxd2	24.21/27.303	46115/1.4193e+05	25.756	94020	11.779	4.7826	200.63	6636	1	0	0	0	TRUE
Mrpl40_11701	Mrpl40	1.0088/0	5.2589/17146	0.50438	8575.6	12.477	0.50879	1.671	6633.6	1	0	0	0	TRUE
Hus1b_53040	Hus1b	81.709/36.754	1.1826e+05/1.9547e+05	59.231	156870	11.347	1010.5	564.36	6600.7	1	0	0	0	TRUE
Defb48_73955	Defb48	38.333/72.457	22219/2.7833e+05	55.395	150270	11.38	582.25	519.23	6592.4	1	0	0	0	TRUE
Styx_24396	Styx	15.131/3.1503	0/98432	9.1408	49216	12.245	71.772	55.876	6582.8	1	0	0	0	TRUE
Tsen2_72627	Tsen2	49.429/55.656	8955.9/2.7909e+05	52.542	144020	11.393	19.387	486.16	6529.6	1	0	0	0	TRUE
Msgn1_24202	Msgn1	3.0263/8.4009	64248/8034.4	5.7136	36141	12.394	14.443	31.4	6448.7	1	0	0	0	TRUE
Gabpb1_6015	Gabpb1	0/1.0501	17065/0	0.52505	8532.5	12.45	0.55136	1.753	6444.2	1	0	0	0	TRUE
Foxp3_15613	Foxp3	69.604/49.355	24196/2.8277e+05	59.479	153480	11.309	205.01	567.31	6441.5	1	0	0	0	TRUE
Tspyl2_22733	Tspyl2	0/1.0501	0/17056	0.52505	8528.1	12.449	0.55136	1.753	6440.8	1	0	0	0	TRUE
Unc45a_47234	Unc45a	0/0	0/16652	0.50438	8326.1	12.434	0	1.671	6440.6	1	0	0	0	TRUE
Cxxc4_69456	Cxxc4	80.7/56.706	64563/2.7034e+05	68.703	167450	11.23	287.86	678.89	6424.1	1	0	0	0	TRUE
Olfr686_67468	Olfr686	107.94/44.105	1.4599e+05/2.0925e+05	76.02	177620	11.171	2037.3	770.17	6397.6	1	0	0	0	TRUE
Psd4_54409	Psd4	166.44/53.556	2.8853e+05/1.5665e+05	110	222590	10.97	6371.9	1221.3	6366	1	0	0	0	TRUE
AI846148_32553	AI846148	58.508/85.059	76327/2.6437e+05	71.783	170350	11.193	352.48	717.03	6359	1	0	0	0	TRUE
Tmprss12_41312	Tmprss12	161.4/151.22	1.1024e+05/4.3803e+05	156.31	274130	10.767	51.864	1895	6293.8	1	0	0	0	TRUE
Rilpl2_44730	Rilpl2	165.44/63.006	1.9298e+05/2.549e+05	114.22	223940	10.925	5245.8	1280.2	6255.7	1	0	0	0	TRUE
Odf4_63833	Odf4	27.236/40.954	3013.3/2.0768e+05	34.095	105350	11.552	94.091	284.06	6248.5	1	0	0	0	TRUE
Bmpr2_1667	Bmpr2	1.0088/0	16076/0	0.50438	8038.2	12.384	0.50879	1.671	6217.9	1	0	0	0	TRUE
Prdx2_17349	Prdx2	8.07/6.3006	52.589/79805	7.1853	39929	12.252	1.5653	41.58	6191.1	1	0	0	0	TRUE
Cab39l_33773	Cab39l	53.464/65.107	28708/2.6491e+05	59.285	146810	11.25	67.778	565	6173.8	1	0	0	0	TRUE
Yipf1_58369	Yipf1	58.508/92.409	1.2009e+05/2.2101e+05	75.459	170550	11.123	574.67	763.08	6171.3	1	0	0	0	TRUE
Ngfrap1_1547	Ngfrap1	15.131/22.052	10875/1.3205e+05	18.592	71463	11.833	23.95	134.04	6170.9	1	0	0	0	TRUE
Gcnt1_6262	Gcnt1	24.21/24.152	5.2589/1.676e+05	24.181	83802	11.7	0.001656	185.55	6150.4	1	0	0	0	TRUE
Klhdc1_68668	Klhdc1	108.95/134.41	52215/4.0576e+05	121.68	228990	10.866	324.33	1385.5	6148.7	1	0	0	0	TRUE
Cask_2088	Cask	0/1.0501	10.518/15979	0.52505	7994.7	12.356	0.55136	1.753	6037.9	1	0	0	0	TRUE
Pfpl_24152	Pfpl	22.193/33.603	1.0277e+05/74733	27.898	88751	11.585	65.105	221.5	5961.5	1	0	0	0	TRUE
Adipor2_32885	Adipor2	20.175/28.353	88523/74239	24.264	81381	11.653	33.439	186.33	5960	1	0	0	0	TRUE
Bcl9l_44718	Bcl9l	6.0525/3.1503	24023/34292	4.6014	29157	12.346	4.2113	24.097	5938.7	1	0	0	0	TRUE
Hadh_7328	Hadh	23.201/16.802	13657/1.3012e+05	20.002	71889	11.741	20.477	146.72	5933.4	1	0	0	0	TRUE
Armc9_44419	Armc9	21.184/27.303	10.518/1.6145e+05	24.243	80730	11.643	18.721	186.14	5915.5	1	0	0	0	TRUE
Cenpw_28039	Cenpw	1.0088/0	0/15216	0.50438	7607.9	12.304	0.50879	1.671	5885	1	0	0	0	TRUE
Lman2_29411	Lman2	1.0088/0	5.2589/15171	0.50438	7588.1	12.301	0.50879	1.671	5869.7	1	0	0	0	TRUE
Zfp28_19151	Zfp28	185.61/129.16	1.2837e+05/3.8439e+05	157.39	256380	10.661	1593.1	1911.3	5860.8	1	0	0	0	TRUE
control_79052	control	16.14/27.303	1909/1.474e+05	21.721	74655	11.682	62.304	162.48	5855.1	1	0	0	0	TRUE
Mrap_43422	Mrap	145.26/164.87	21062/4.8372e+05	155.06	252390	10.659	192.21	1876.1	5823.5	1	0	0	0	TRUE
Mepce_59019	Mepce	21.184/7.3508	35140/79401	14.267	57270	11.873	95.676	96.669	5823.4	1	0	0	0	TRUE
Upk3bl_34788	Upk3bl	7.0613/5.2505	5.2589/68045	6.1559	34025	12.215	1.6394	34.401	5800.1	1	0	0	0	TRUE
Myo1e_36958	Myo1e	28.245/9.451	3570.8/1.312e+05	18.848	67384	11.729	176.61	136.33	5769.6	1	0	0	0	TRUE
Pax1_12524	Pax1	0/1.0501	15272/0	0.52505	7635.9	12.29	0.55136	1.753	5766.9	1	0	0	0	TRUE
Abcd3_14215	Abcd3	53.464/30.453	1.3006e+05/89814	41.958	109940	11.321	264.75	367.55	5732.2	1	0	0	0	TRUE
Apol6_37639	Apol6	22.193/67.207	1.0175e+05/1.2666e+05	44.7	114210	11.287	1013.1	397.63	5725.1	1	0	0	0	TRUE
Wnt6_18911	Wnt6	26.228/71.407	10.518/2.4013e+05	48.817	120070	11.235	1020.6	443.67	5698.2	1	0	0	0	TRUE
Nod1_48666	Nod1	73.639/58.806	2.1353e+05/75945	66.222	144740	11.072	110.01	648.49	5681.1	1	0	0	0	TRUE
Coro1b_19377	Coro1b	47.411/19.952	20741/1.6724e+05	33.682	93991	11.404	377.01	279.79	5617.1	1	0	0	0	TRUE
Mon1b_68551	Mon1b	36.315/26.253	24796/1.5476e+05	31.284	89779	11.441	50.625	255.3	5617	1	0	0	0	TRUE
Rnf166_33291	Rnf166	59.516/45.155	93208/1.5369e+05	52.335	123450	11.177	103.13	483.79	5610.1	1	0	0	0	TRUE
Gm20815_77292	Gm20815	67.586/65.107	1.5395e+05/1.3066e+05	66.347	142300	11.045	3.0743	650	5579	1	0	0	0	TRUE
4930596D02Rik_61369	4930596D02Rik	1.0088/0	10.518/14408	0.50438	7209.2	12.227	0.50879	1.671	5576.6	1	0	0	0	TRUE
Pkn2_49486	Pkn2	104.91/102.91	88265/2.8372e+05	103.91	185990	10.792	1.9991	1137.5	5511.6	1	0	0	0	TRUE
Synpr_37804	Synpr	53.464/27.303	11159/1.952e+05	40.383	103180	11.284	342.2	350.49	5509.3	1	0	0	0	TRUE
Tmem229a_69688	Tmem229a	13.114/31.503	10539/1.3111e+05	22.309	70823	11.569	169.09	167.93	5463.6	1	0	0	0	TRUE
Alas2_599	Alas2	18.158/11.551	64511/45603	14.854	55057	11.762	21.822	101.6	5460.7	1	0	0	0	TRUE
Ehd4_46557	Ehd4	3.0263/5.2505	26.294/50226	4.1384	25126	12.256	2.4737	21.171	5459.9	1	0	0	0	TRUE
Sp7_50943	Sp7	22.193/34.654	1.239e+05/40441	28.423	82170	11.447	77.639	226.68	5455.8	1	0	0	0	TRUE
Nxpe4_63240	Nxpe4	7.0613/1.0501	5.2589/49553	4.0557	24779	12.259	18.067	20.655	5451.2	1	0	0	0	TRUE
Senp3_44903	Senp3	0/2.1002	21840/0	1.0501	10920	12.379	2.2055	4.0191	5446.5	1	0	0	0	TRUE
Kcnb1_9025	Kcnb1	82.718/102.91	1.8966e+05/1.527e+05	92.814	171180	10.833	203.88	987.91	5443.2	1	0	0	0	TRUE
Slc6a3_4008	Slc6a3	60.525/63.006	77490/1.8802e+05	61.766	132760	11.047	3.0787	594.59	5441.8	1	0	0	0	TRUE
Poll_25122	Poll	78.683/85.059	90316/2.2572e+05	81.871	158020	10.897	20.328	844.77	5434	1	0	0	0	TRUE
Gcm2_48784	Gcm2	15.131/15.752	23218/88468	15.441	55843	11.73	0.19242	106.58	5407.7	1	0	0	0	TRUE
5430419D17Rik_36785	5430419D17Rik	13.114/17.852	47624/64230	15.483	55927	11.728	11.225	106.93	5407	1	0	0	0	TRUE
Uty_18583	Uty	43.376/43.054	36.812/2.11e+05	43.215	105520	11.221	0.051804	381.28	5401.7	1	0	0	0	TRUE
Catsperb_68669	Catsperb	10.088/1.0501	51132/8438.3	5.5688	29785	12.147	40.837	30.429	5398.6	1	0	0	0	TRUE
Rab2a_26414	Rab2a	10.088/32.553	38316/97714	21.32	68015	11.573	252.36	158.77	5396.1	1	0	0	0	TRUE
Olfr46_12199	Olfr46	4.035/0	32063/0	2.0175	16032	12.375	8.1406	8.8382	5391.9	1	0	0	0	TRUE
Zscan4c_63325	Zscan4c	16.14/26.253	47840/87480	21.196	67660	11.574	51.133	157.63	5387.3	1	0	0	0	TRUE
Hist1h4j_69214	Hist1h4j	37.324/2.1002	19558/1.0965e+05	19.712	64606	11.607	620.35	144.1	5380.4	1	0	0	0	TRUE
Mterf1a_75006	Mterf1a	29.254/30.453	15735/1.5086e+05	29.853	83296	11.399	0.71921	240.9	5364.7	1	0	0	0	TRUE
Rad50_14368	Rad50	15.131/19.952	36644/82902	17.542	59773	11.655	11.62	124.75	5350	1	0	0	0	TRUE
Ifna12_62441	Ifna12	176.53/84.009	92819/3.2093e+05	130.27	206870	10.622	4280.2	1508.8	5322.5	1	0	0	0	TRUE
Ces2h_74580	Ces2h	52.455/11.551	1.3987e+05/32631	32.003	86251	11.352	836.56	262.6	5320.6	1	0	0	0	TRUE
Krt33b_9509	Krt33b	18.158/17.852	21.036/1.2061e+05	18.005	60313	11.632	0.046723	128.83	5312.1	1	0	0	0	TRUE
Spata31d1c_61297	Spata31d1c	184.6/50.405	62849/3.2366e+05	117.5	193260	10.671	9004.3	1326.3	5303.3	1	0	0	0	TRUE
Spns3_43651	Spns3	1.0088/8.4009	52757/0	4.7048	26379	12.175	27.322	24.76	5300.2	1	0	0	0	TRUE
Atpaf2_63792	Atpaf2	16.14/46.205	18448/1.5e+05	31.172	84226	11.354	451.94	254.17	5281.1	1	0	0	0	TRUE
Dytn_62018	Dytn	22.193/17.852	75796/50720	20.022	63258	11.555	9.4208	146.9	5217.5	1	0	0	0	TRUE
Kcnj9_9094	Kcnj9	54.473/19.952	23076/1.6136e+05	37.212	92218	11.237	595.83	316.64	5180.3	1	0	0	0	TRUE
Uba7_40220	Uba7	7.0613/1.0501	0/47039	4.0557	23520	12.184	18.067	20.655	5174.1	1	0	0	0	TRUE
Man1a2_10303	Man1a2	37.324/31.503	44022/1.3106e+05	34.414	87543	11.271	16.939	287.35	5162.3	1	0	0	0	TRUE
Fhl1_5616	Fhl1	140.22/114.46	59047/3.3628e+05	127.34	197660	10.589	331.65	1466.5	5158.3	1	0	0	0	TRUE
Agpat1_23948	Agpat1	68.595/44.105	42849/1.9475e+05	56.35	118800	11.016	299.89	530.39	5156.1	1	0	0	0	TRUE
Dpys_27068	Dpys	34.298/24.152	14504/1.4336e+05	29.225	78933	11.351	51.461	234.63	5151.2	1	0	0	0	TRUE
Gm20747_74444	Gm20747	162.41/194.27	1.1747e+05/3.681e+05	178.34	242780	10.403	507.56	2235	5131.7	1	0	0	0	TRUE
Zbtb4_41873	Zbtb4	29.254/46.205	14125/1.6953e+05	37.729	91827	11.211	143.67	322.11	5114.3	1	0	0	0	TRUE
Tmc7_52874	Tmc7	9.0788/7.3508	0/71546	8.2148	35773	11.923	1.493	49.005	5109	1	0	0	0	TRUE
Socs5_24889	Socs5	23.201/25.203	1.2741e+05/11356	24.202	69381	11.427	2.0026	185.74	5089	1	0	0	0	TRUE
Fam208a_55704	Fam208a	1.0088/2.1002	25742/0	1.5545	12871	12.299	0.59565	6.4478	5068.3	1	0	0	0	TRUE
Gm8909_76834	Gm8909	1.0088/1.0501	0/19974	1.0294	9986.8	12.265	0.00085518	3.9242	5040.9	1	0	0	0	TRUE
Acat2_49871	Acat2	14.123/33.603	72630/62883	23.863	67757	11.412	189.75	182.53	5013.4	1	0	0	0	TRUE
H2afb2_75680	H2afb2	232.01/63.006	1.2386e+05/2.9606e+05	147.51	209960	10.465	14282	1762.5	4997.7	1	0	0	0	TRUE
Ttc36_51865	Ttc36	26.228/39.904	36.812/1.6509e+05	33.066	82561	11.243	93.524	273.46	4990.7	1	0	0	0	TRUE
Olfr538_64460	Olfr538	41.359/63.006	12211/2.0696e+05	52.183	109590	11.009	234.31	482.03	4989	1	0	0	0	TRUE
Zmynd15_75325	Zmynd15	31.271/57.756	1509.3/1.9642e+05	44.514	98962	11.086	350.72	395.57	4973.5	1	0	0	0	TRUE
Vgll1_51229	Vgll1	110.96/102.91	0/3.4112e+05	106.94	170560	10.626	32.418	1179	4964.2	1	0	0	0	TRUE
Sec13_49842	Sec13	13.114/10.501	18490/68314	11.807	43402	11.727	3.4131	76.559	4959	1	0	0	0	TRUE
Stil_15823	Stil	40.35/16.802	20168/1.2967e+05	28.576	74920	11.307	277.26	228.19	4957.8	1	0	0	0	TRUE
Tubg1_47587	Tubg1	5.0438/3.1503	18301/26976	4.097	22638	12.117	1.7925	20.913	4949.5	1	0	0	0	TRUE
Pih1d1_33517	Pih1d1	3.0263/0	5.2589/24687	1.5131	12346	12.262	4.5791	6.2412	4941.2	1	0	0	0	TRUE
Map4k4_20588	Map4k4	21.184/19.952	34598/86672	20.568	60635	11.457	0.75858	151.87	4918.6	1	0	0	0	TRUE
Ppp1r27_33270	Ppp1r27	28.245/28.353	15.777/1.4767e+05	28.299	73843	11.299	0.0058187	225.45	4916.1	1	0	0	0	TRUE
Pth2r_53822	Pth2r	1.0088/3.1503	0/29579	2.0795	14789	12.23	2.2932	9.1685	4883.6	1	0	0	0	TRUE
Asap3_58585	Asap3	25.219/5.2505	2839.8/97130	15.235	49985	11.588	199.37	104.82	4880.8	1	0	0	0	TRUE
Speer2_56221	Speer2	29.254/24.152	6442.1/1.3421e+05	26.703	70324	11.31	13.012	209.8	4853.2	1	0	0	0	TRUE
Adam11_236	Adam11	18.158/48.305	1.4276e+05/18268	33.231	80516	11.2	454.43	275.15	4851.9	1	0	0	0	TRUE
Pwp2_49983	Pwp2	1.0088/0	0/12523	0.50438	6261.4	12.023	0.50879	1.671	4843.4	1	0	0	0	TRUE
Mtfmt_34701	Mtfmt	28.245/17.852	3313.1/1.246e+05	23.048	63956	11.377	54.009	174.85	4835	1	0	0	0	TRUE
Sucla2_16898	Sucla2	14.123/30.453	35534/89455	22.288	62495	11.39	133.34	167.73	4823.7	1	0	0	0	TRUE
Ndufaf1_34862	Ndufaf1	18.158/5.2505	10.518/83710	11.704	41860	11.686	83.295	75.735	4808.8	1	0	0	0	TRUE
Mitf_10696	Mitf	0/5.2505	0/33529	2.6253	16764	12.175	13.784	12.164	4805.9	1	0	0	0	TRUE
Vmn1r148_45046	Vmn1r148	71.621/64.057	29260/2.1774e+05	67.839	123500	10.809	28.613	668.27	4774.7	1	0	0	0	TRUE
Rnase13_74696	Rnase13	19.166/17.852	3723.3/1.0548e+05	18.509	54601	11.451	0.86388	133.31	4727.5	1	0	0	0	TRUE
control_79092	control	57.499/24.152	87150/91116	40.826	89133	11.057	555.99	355.26	4726.8	1	0	0	0	TRUE
Evi2a_5212	Evi2a	14.123/16.802	0/97579	15.462	48790	11.533	3.5891	106.75	4720.6	1	0	0	0	TRUE
Dmtf1_19507	Dmtf1	54.473/43.054	15.777/1.9763e+05	48.763	98821	10.956	65.187	443.06	4692.5	1	0	0	0	TRUE
Ppp1r14d_38010	Ppp1r14d	19.166/47.255	8324.8/1.4664e+05	33.211	77481	11.145	394.48	274.94	4670.8	1	0	0	0	TRUE
Fastkd3_34649	Fastkd3	27.236/10.501	30265/78907	18.869	54586	11.424	140.03	136.51	4670.3	1	0	0	0	TRUE
Rbmx_14521	Rbmx	131.14/103.96	95906/2.4453e+05	117.55	170220	10.488	369.29	1326.9	4669.6	1	0	0	0	TRUE
Esco2_37758	Esco2	15.131/17.852	8924.3/91295	16.492	50110	11.484	3.7007	115.59	4659.2	1	0	0	0	TRUE
Ralgapb_57807	Ralgapb	385.34/414.79	1.0973e+05/6.217e+05	400.07	365710	9.8327	433.64	6155.9	4656.1	1	0	0	0	TRUE
Olfr111_74850	Olfr111	56.49/90.309	25542/2.2739e+05	73.4	126460	10.731	571.87	737.21	4655	1	0	0	0	TRUE
Hspa4l_12375	Hspa4l	2.0175/3.1503	0/32003	2.5839	16001	12.124	0.64164	11.932	4631.6	1	0	0	0	TRUE
Slc11a2_11894	Slc11a2	25.219/46.205	11832/1.4888e+05	35.712	80357	11.096	220.21	300.87	4630.7	1	0	0	0	TRUE
Osbpl2_57873	Osbpl2	135.17/107.11	72110/2.7187e+05	121.14	171990	10.46	393.73	1377.8	4630.2	1	0	0	0	TRUE
Harbi1_62168	Harbi1	32.28/32.553	5.2589/1.5104e+05	32.417	75521	11.142	0.037347	266.81	4621.5	1	0	0	0	TRUE
4930523C07Rik_31204	4930523C07Rik	37.324/25.203	11775/1.3587e+05	31.263	73820	11.16	73.462	255.09	4620.1	1	0	0	0	TRUE
control_78824	control	39.341/56.706	72189/1.18e+05	48.024	95095	10.922	150.76	434.72	4558.7	1	0	0	0	TRUE
Olfr742_65177	Olfr742	15.131/3.1503	53346/14812	9.1408	34079	11.715	71.772	55.876	4557.8	1	0	0	0	TRUE
Rec114_39619	Rec114	6.0525/14.702	10165/63332	10.377	36749	11.657	37.403	65.308	4546.1	1	0	0	0	TRUE
Vmn1r59_73546	Vmn1r59	252.19/187.97	53004/4.3709e+05	220.08	245050	10.114	2062	2908.5	4539.7	1	0	0	0	TRUE
Pdgfc_23765	Pdgfc	124.08/58.806	42.071/2.8246e+05	91.441	141250	10.577	2130.1	969.71	4533	1	0	0	0	TRUE
Ino80c_56562	Ino80c	62.543/45.155	33362/1.6962e+05	53.849	101490	10.854	151.17	501.25	4530.7	1	0	0	0	TRUE
Olfr777_65591	Olfr777	21.184/17.852	24785/83306	19.518	54046	11.363	5.5509	142.34	4528.3	1	0	0	0	TRUE
Pdia3_6989	Pdia3	12.105/8.4009	7983/64544	10.253	36264	11.654	6.8604	64.348	4519.4	1	0	0	0	TRUE
Rassf2_54417	Rassf2	172.5/115.51	64874/3.0908e+05	144	186970	10.333	1623.6	1710.2	4517.7	1	0	0	0	TRUE
Cdc42bpb_55434	Cdc42bpb	90.788/57.756	1.0037e+05/1.4673e+05	74.272	123550	10.681	545.55	748.15	4514.3	1	0	0	0	TRUE
Lbh_43877	Lbh	100.88/107.11	12837/2.9117e+05	103.99	152000	10.5	19.443	1138.6	4501.6	1	0	0	0	TRUE
Nr2e1_17750	Nr2e1	93.814/89.259	51442/2.2819e+05	91.537	139820	10.561	10.373	970.97	4484.1	1	0	0	0	TRUE
Pkn3_67767	Pkn3	32.28/48.305	7856.8/1.5979e+05	40.293	83823	10.987	128.4	349.51	4481.5	1	0	0	0	TRUE
Txndc11_48256	Txndc11	18.158/27.303	44385/72578	22.73	58482	11.267	41.818	171.86	4459.2	1	0	0	0	TRUE
Nim1k_63351	Nim1k	67.586/13.651	42981/1.2447e+05	40.619	83723	10.974	1454.5	353.03	4453.8	1	0	0	0	TRUE
Mras_10894	Mras	16.14/7.3508	32663/44974	11.745	38819	11.573	38.626	76.064	4449.6	1	0	0	0	TRUE
Phip_45442	Phip	23.201/15.752	6673.5/99060	19.476	52867	11.334	27.749	141.97	4435.3	1	0	0	0	TRUE
Olfr710_65782	Olfr710	2.0175/5.2505	3050.2/34606	3.634	18828	11.988	5.2263	18.068	4428.7	1	0	0	0	TRUE
Vmn1r14_50223	Vmn1r14	97.849/107.11	42629/2.5369e+05	102.48	148160	10.484	42.894	1118	4428	1	0	0	0	TRUE
Gm5615_74297	Gm5615	23.201/34.654	91536/42685	28.927	67111	11.131	65.577	231.67	4407.3	1	0	0	0	TRUE
Chrd_2850	Chrd	13.114/10.501	5.2589/76977	11.807	38491	11.553	3.4131	76.559	4397.7	1	0	0	0	TRUE
Ctxn3_76088	Ctxn3	135.17/126.01	1.046e+05/2.3757e+05	130.59	171090	10.344	41.95	1513.5	4394.5	1	0	0	0	TRUE
Rtp1_61612	Rtp1	20.175/10.501	17507/72803	15.338	45155	11.432	46.793	105.7	4390.6	1	0	0	0	TRUE
Maoa_10320	Maoa	26.228/16.802	0/1.1127e+05	21.515	55635	11.271	44.423	160.57	4388.9	1	0	0	0	TRUE
Zmym1_32699	Zmym1	12.105/3.1503	15193/43493	7.6277	29343	11.732	40.093	44.742	4385.7	1	0	0	0	TRUE
Epas1_4957	Epas1	3.0263/2.1002	0/30073	2.5632	15036	12.043	0.42877	11.816	4373.6	1	0	0	0	TRUE
Wnt8a_16846	Wnt8a	21.184/82.959	30859/1.6091e+05	52.071	95885	10.819	1908.1	480.75	4370.8	1	0	0	0	TRUE
Snai3_21708	Snai3	224.95/133.36	60914/3.5338e+05	179.16	207150	10.167	4194.2	2247.8	4365.4	1	0	0	0	TRUE
Tmem158_38316	Tmem158	45.394/49.355	70564/1.0853e+05	47.374	89547	10.854	7.8458	427.42	4329.1	1	0	0	0	TRUE
Hmgn1_7651	Hmgn1	8.07/4.2004	50680/0	6.1352	25340	11.794	7.4868	34.26	4328.2	1	0	0	0	TRUE
Stap2_48395	Stap2	9.0788/12.601	13032/58215	10.84	35623	11.555	6.2041	68.912	4290	1	0	0	0	TRUE
Fam104a_21341	Fam104a	89.779/178.52	98015/2.4134e+05	134.15	169680	10.294	3937.3	1565.1	4285.6	1	0	0	0	TRUE
Erich4_76213	Erich4	2.0175/13.651	46331/11760	7.8345	29045	11.683	67.674	46.235	4270.5	1	0	0	0	TRUE
Acd_74711	Acd	45.394/16.802	1.3578e+05/44.885	31.098	67912	11.047	408.75	253.41	4264.2	1	0	0	0	TRUE
Mid1_10673	Mid1	44.385/45.155	19542/1.5077e+05	44.77	85155	10.861	0.29613	398.4	4264	1	0	0	0	TRUE
Sptssb_27692	Sptssb	12.105/8.4009	21.036/68270	10.253	34145	11.567	6.8604	64.348	4255.3	1	0	0	0	TRUE
Slc37a3_38078	Slc37a3	30.263/36.754	17433/1.2442e+05	33.508	70927	11.005	21.068	278	4251.9	1	0	0	0	TRUE
Psph_46944	Psph	10.088/7.3508	0/61627	8.7191	30813	11.63	3.7449	52.726	4242.3	1	0	0	0	TRUE
Olfr1211_64202	Olfr1211	64.56/44.105	67897/1.2298e+05	54.332	95441	10.752	209.21	506.86	4236.8	1	0	0	0	TRUE
Loxl3_9950	Loxl3	32.28/19.952	45794/74329	26.116	60062	11.113	75.99	204.1	4202.3	1	0	0	0	TRUE
Rtf1_42531	Rtf1	1.0088/1.0501	0/16562	1.0294	8281.2	11.995	0.00085518	3.9242	4179.9	1	0	0	0	TRUE
Gal3st4_71087	Gal3st4	57.499/37.804	40010/1.3353e+05	47.651	86771	10.801	193.95	430.53	4179.6	1	0	0	0	TRUE
Cdip1_28803	Cdip1	90.788/36.754	71326/1.3627e+05	63.771	103800	10.646	1459.8	618.72	4170.4	1	0	0	0	TRUE
Cxcr4_3024	Cxcr4	73.639/63.006	10318/2.0548e+05	68.323	107900	10.604	56.524	674.21	4152.9	1	0	0	0	TRUE
Abcb6_40090	Abcb6	198.72/200.57	75412/3.462e+05	199.65	210800	10.037	1.705	2574.3	4150.9	1	0	0	0	TRUE
Fam171a2_55126	Fam171a2	10.088/7.3508	0/60235	8.7191	30118	11.598	3.7449	52.726	4146.5	1	0	0	0	TRUE
Camk2b_1975	Camk2b	5.0438/4.2004	11811/28951	4.6221	20381	11.824	0.3556	24.23	4139.6	1	0	0	0	TRUE
Zfp11_19083	Zfp11	78.683/17.852	11254/1.6141e+05	48.267	86330	10.775	1850.2	437.46	4125.2	1	0	0	0	TRUE
Ago3_53964	Ago3	21.184/9.451	18369/65936	15.317	42152	11.335	68.829	105.52	4102	1	0	0	0	TRUE
Eme2_51984	Eme2	82.718/51.455	26505/1.8403e+05	67.086	105270	10.594	488.67	659.05	4097.8	1	0	0	0	TRUE
Cenpt_70040	Cenpt	0/2.1002	0/16383	1.0501	8191.4	11.964	2.2055	4.0191	4085.5	1	0	0	0	TRUE
Gdf7_61160	Gdf7	40.35/43.054	31.553/1.5539e+05	41.702	77711	10.83	3.6568	364.77	4066.7	1	0	0	0	TRUE
Olfr980_67596	Olfr980	8.07/3.1503	15.777/45064	5.6102	22540	11.736	12.102	30.706	4066.7	1	0	0	0	TRUE
Notum_43665	Notum	14.123/15.752	15372/66070	14.937	40721	11.319	1.327	102.3	4024.6	1	0	0	0	TRUE
Grik4_49922	Grik4	35.306/49.355	45694/1.0938e+05	42.331	77539	10.805	98.684	371.61	4020.1	1	0	0	0	TRUE
M6pr_10165	M6pr	0/0	10349/44.885	0.50438	5197.2	11.755	0	1.671	4020.1	1	0	0	0	TRUE
Gm15056_78474	Gm15056	7.0613/9.451	0/56420	8.2561	28210	11.574	2.8554	49.308	4016.2	1	0	0	0	TRUE
Xlr3b_75336	Xlr3b	26.228/23.102	28077/82588	24.665	55332	11.074	4.8833	190.15	4010.8	1	0	0	0	TRUE
Olfr1214_66854	Olfr1214	1.0088/1.0501	0/15844	1.0294	7922.1	11.931	0.00085518	3.9242	3998.6	1	0	0	0	TRUE
Atp6v1g2_27840	Atp6v1g2	7.0613/10.501	3150.1/54939	8.7812	29044	11.536	5.9162	53.187	3981.3	1	0	0	0	TRUE
Dvl1_4552	Dvl1	18.158/36.754	0/1.1688e+05	27.456	58440	11.004	172.91	217.15	3963.9	1	0	0	0	TRUE
Olfr231_73527	Olfr231	7.0613/33.603	31858/64903	20.332	48381	11.147	352.24	149.72	3952.3	1	0	0	0	TRUE
Mc1r_10427	Mc1r	307.67/96.61	45726/3.5643e+05	202.14	201080	9.9511	22273	2614.6	3928.5	1	0	0	0	TRUE
Olfr735_64028	Olfr735	12.105/7.3508	60898/44.885	9.7279	30471	11.472	11.301	60.32	3922.1	1	0	0	0	TRUE
D15Ertd621e_53131	D15Ertd621e	8.07/2.1002	120.95/40800	5.0851	20461	11.715	17.819	27.228	3920.1	1	0	0	0	TRUE
Ttc21a_40008	Ttc21a	9.0788/2.1002	3786.4/39409	5.5895	21598	11.678	24.35	30.567	3905.4	1	0	0	0	TRUE
Cbs_2217	Cbs	89.779/117.61	1.0922e+05/1.54e+05	103.7	131610	10.296	387.34	1134.5	3904.2	1	0	0	0	TRUE
Fgf1_5512	Fgf1	3.0263/2.1002	0/26796	2.5632	13398	11.877	0.42877	11.816	3896.9	1	0	0	0	TRUE
Gadd45a_4104	Gadd45a	18.158/7.3508	39521/31913	12.754	35717	11.343	58.393	84.19	3891.2	1	0	0	0	TRUE
Olfr1271_66493	Olfr1271	10.088/6.3006	5.2589/54310	8.1941	27158	11.528	7.1702	48.853	3884.3	1	0	0	0	TRUE
Dync2h1_49830	Dync2h1	129.12/6.3006	22466/1.7756e+05	67.71	100010	10.507	7542.3	666.69	3870.9	1	0	0	0	TRUE
Vmn2r22_75231	Vmn2r22	34.298/45.155	11517/1.3165e+05	39.726	71582	10.779	58.938	343.42	3860.6	1	0	0	0	TRUE
Zfp646_59949	Zfp646	6.0525/0	21735/7585.5	3.0263	14660	11.83	18.316	14.458	3854.7	1	0	0	0	TRUE
Spidr_56112	Spidr	18.158/23.102	34772/60370	20.63	47571	11.103	12.226	152.44	3851.3	1	0	0	0	TRUE
Wiz_18859	Wiz	37.324/66.157	3602.3/1.6419e+05	51.74	83895	10.635	415.67	476.95	3839.1	1	0	0	0	TRUE
Chdh_55708	Chdh	125.09/59.856	45416/1.9475e+05	92.471	120090	10.327	2127.4	983.35	3826.5	1	0	0	0	TRUE
4933425L06Rik_29118	4933425L06Rik	10.088/12.601	21493/43673	11.344	32583	11.366	3.1595	72.879	3815.4	1	0	0	0	TRUE
Epgn_37612	Epgn	8.07/3.1503	3134.3/38780	5.6102	20957	11.631	12.102	30.706	3781	1	0	0	0	TRUE
Angptl4_25966	Angptl4	11.096/2.1002	0/46231	6.5982	23116	11.571	40.464	37.454	3776	1	0	0	0	TRUE
Olfr168_64924	Olfr168	6.0525/7.3508	5.2589/46366	6.7016	23186	11.556	0.84272	38.174	3751.5	1	0	0	0	TRUE
1700001P01Rik_38193	1700001P01Rik	18.158/12.601	2624.2/74643	15.379	38634	11.204	15.436	106.05	3750.1	1	0	0	0	TRUE
Xylt2_55042	Xylt2	15.131/24.152	3229/86448	19.642	44838	11.085	40.691	143.46	3741.9	1	0	0	0	TRUE
Pot1b_38931	Pot1b	28.245/17.852	0/98297	23.048	49149	10.997	54.009	174.85	3715.2	1	0	0	0	TRUE
Pcdhb19_45944	Pcdhb19	113.99/81.908	1.5036e+05/90802	97.949	120580	10.251	514.58	1056.6	3706.5	1	0	0	0	TRUE
Odf2l_22444	Odf2l	85.744/71.407	26784/1.8335e+05	78.576	105070	10.367	102.77	802.58	3706	1	0	0	0	TRUE
Mfsd9_53323	Mfsd9	20.175/13.651	31664/48475	16.913	40070	11.127	21.279	119.25	3667.7	1	0	0	0	TRUE
Stxbp1_16880	Stxbp1	67.586/97.66	37801/1.7676e+05	82.623	107280	10.325	452.21	854.46	3667.2	1	0	0	0	TRUE
E2f5_4575	E2f5	64.56/79.808	2224.5/1.9493e+05	72.184	98579	10.396	116.25	722.03	3666	1	0	0	0	TRUE
Prl7b1_41891	Prl7b1	24.21/25.203	21614/79625	24.706	50620	10.943	0.49259	190.55	3665.3	1	0	0	0	TRUE
Pou2f3_13436	Pou2f3	4.035/15.752	0/57542	9.8933	28771	11.367	68.64	61.584	3665	1	0	0	0	TRUE
Runx3_2178	Runx3	10.088/15.752	36.812/67776	12.92	33906	11.25	16.041	85.538	3664.7	1	0	0	0	TRUE
Fcgr4_63693	Fcgr4	29.254/40.954	15.777/1.2469e+05	35.104	62353	10.754	68.45	294.53	3631.2	1	0	0	0	TRUE
Foxb1_26898	Foxb1	27.236/68.257	9076.8/1.4166e+05	47.747	75366	10.594	841.35	431.6	3625.4	1	0	0	0	TRUE
Ikzf4_19335	Ikzf4	130.13/119.71	7841/2.667e+05	124.92	137270	10.09	54.253	1431.7	3624.6	1	0	0	0	TRUE
Cpped1_56104	Cpped1	20.175/54.606	18106/1.11e+05	37.39	64553	10.716	592.73	318.52	3614.9	1	0	0	0	TRUE
Cmtr2_60226	Cmtr2	0/2.1002	0/14453	1.0501	7226.4	11.784	2.2055	4.0191	3604.1	1	0	0	0	TRUE
Ndst1_8102	Ndst1	54.473/38.854	71726/75720	46.663	73723	10.595	121.97	419.46	3597.4	1	0	0	0	TRUE
Tln2_35892	Tln2	7.0613/14.702	63.107/59786	10.881	29925	11.298	29.187	69.235	3595.1	1	0	0	0	TRUE
Olfr1205_66850	Olfr1205	1.0088/7.3508	33178/44.885	4.1798	16612	11.647	20.111	21.429	3587.6	1	0	0	0	TRUE
Hif3a_22956	Hif3a	22.193/36.754	15.777/1.1019e+05	29.473	55104	10.82	106.01	237.1	3576.7	1	0	0	0	TRUE
Shroom3_21176	Shroom3	33.289/59.856	43701/1.0189e+05	46.572	72795	10.58	352.91	418.44	3556.3	1	0	0	0	TRUE
Zfp57_19212	Zfp57	8.07/3.1503	8219.6/31195	5.6102	19707	11.542	12.102	30.706	3555.4	1	0	0	0	TRUE
Clip4_44407	Clip4	141.23/33.603	43612/1.7177e+05	87.414	107690	10.25	5791.2	916.71	3554	1	0	0	0	TRUE
Fyb_19547	Fyb	22.193/25.203	48187/47398	23.698	47793	10.918	4.5302	180.96	3551	1	0	0	0	TRUE
Olfr1502_66510	Olfr1502	68.595/67.207	15.777/1.8349e+05	67.901	91752	10.379	0.96353	669.03	3544.6	1	0	0	0	TRUE
Tpx2_38025	Tpx2	0/0	9161/0	0.50438	4580.5	11.572	0	1.671	3543	1	0	0	0	TRUE
Map1lc3b_30758	Map1lc3b	24.21/17.852	0/88513	21.031	44256	10.972	20.213	156.11	3540.4	1	0	0	0	TRUE
Ahsa2_67868	Ahsa2	14.123/16.802	21.036/73162	15.462	36592	11.118	3.5891	106.75	3540	1	0	0	0	TRUE
Mrpl47_41008	Mrpl47	0/2.1002	0/14184	1.0501	7091.8	11.756	2.2055	4.0191	3536.9	1	0	0	0	TRUE
Nfe2_11538	Nfe2	155.35/116.56	88912/1.9336e+05	135.95	141140	10.009	752.17	1591.5	3534.4	1	0	0	0	TRUE
Xntrpc_78634	Xntrpc	103.9/47.255	63.107/1.9462e+05	75.578	97341	10.312	1604.4	764.59	3517.6	1	0	0	0	TRUE
Pet100_78448	Pet100	1.0088/0	1504/7585.5	0.50438	4544.8	11.561	0.50879	1.671	3515.4	1	0	0	0	TRUE
Hemgn_45974	Hemgn	13.114/10.501	2676.8/58799	11.807	30738	11.229	3.4131	76.559	3511.6	1	0	0	0	TRUE
Casp9_2114	Casp9	1.0088/5.2505	10691/16473	3.1296	13582	11.683	8.9964	15.062	3498.9	1	0	0	0	TRUE
Amz2_5150	Amz2	5.0438/1.0501	18264/8438.3	3.0469	13351	11.688	7.9746	14.579	3495.9	1	0	0	0	TRUE
Zzef1_52077	Zzef1	129.12/130.21	1.4072e+05/1.3017e+05	129.67	135440	10.018	0.59756	1500	3493.7	1	0	0	0	TRUE
Spint4_44007	Spint4	142.23/187.97	27604/2.8627e+05	165.1	156940	9.8839	1045.9	2029.3	3480.2	1	0	0	0	TRUE
Tbc1d2_72527	Tbc1d2	73.639/53.556	31.553/1.729e+05	63.597	86464	10.386	201.67	616.62	3479.4	1	0	0	0	TRUE
Crls1_28692	Crls1	20.175/25.203	15614/75272	22.689	45443	10.906	12.638	171.48	3468.5	1	0	0	0	TRUE
Vmn2r63_74562	Vmn2r63	56.49/26.253	41919/89051	41.371	65485	10.594	457.15	361.17	3443.6	1	0	0	0	TRUE
Bves_19445	Bves	143.24/106.06	45474/2.1486e+05	124.65	130170	10.017	691.24	1427.9	3441.5	1	0	0	0	TRUE
Gcc2_35569	Gcc2	12.105/0	39699/0	6.0525	19850	11.459	73.266	33.695	3418.5	1	0	0	0	TRUE
Lpin2_27094	Lpin2	48.42/57.756	78794/72938	53.088	75866	10.454	43.579	492.46	3416.3	1	0	0	0	TRUE
Ptk2b_14024	Ptk2b	24.21/13.651	3996.8/75765	18.931	39881	10.967	55.742	137.07	3404.8	1	0	0	0	TRUE
Tubal3_61264	Tubal3	141.23/58.806	30239/1.9404e+05	100.02	112140	10.116	3396.5	1084.5	3402.1	1	0	0	0	TRUE
Ica1_8199	Ica1	6.0525/15.752	19169/37434	10.902	28301	11.215	47.036	69.397	3396	1	0	0	0	TRUE
Cdc34_54583	Cdc34	37.324/70.357	15587/1.3645e+05	53.841	76018	10.437	545.6	501.16	3393.3	1	0	0	0	TRUE
Zkscan2_52974	Zkscan2	15.131/6.3006	8524.7/47398	10.716	27961	11.221	38.99	67.942	3391	1	0	0	0	TRUE
Pbp2_42680	Pbp2	35.306/52.505	82938/50809	43.906	66874	10.54	147.9	388.87	3389	1	0	0	0	TRUE
Egr1_4761	Egr1	0/7.3508	0/28906	3.6754	14453	11.594	27.017	18.318	3376	1	0	0	0	TRUE
1700028P14Rik_30875	1700028P14Rik	6.0525/32.553	15004/64903	19.303	39953	10.942	351.15	140.41	3370.1	1	0	0	0	TRUE
Iqck_74270	Iqck	5.0438/1.0501	10712/14947	3.0469	12829	11.63	7.9746	14.579	3359.3	1	0	0	0	TRUE
Stat5b_16763	Stat5b	70.613/32.553	1.146e+05/31419	51.583	73008	10.439	724.25	475.15	3346.9	1	0	0	0	TRUE
Cpvl_36673	Cpvl	4.035/15.752	41587/10907	9.8933	26247	11.235	68.64	61.584	3343.4	1	0	0	0	TRUE
Cd72_2492	Cd72	57.499/68.257	21898/1.4282e+05	62.878	82360	10.332	57.869	607.95	3337.7	1	0	0	0	TRUE
Alox8_658	Alox8	56.49/38.854	51074/87525	47.672	69300	10.476	155.52	430.76	3336.7	1	0	0	0	TRUE
Chka_2836	Chka	35.306/9.451	16061/70514	22.379	43287	10.855	334.25	168.58	3332.2	1	0	0	0	TRUE
Slc7a10_23175	Slc7a10	2.0175/7.3508	36.812/33035	4.6841	16536	11.506	14.222	24.627	3331.2	1	0	0	0	TRUE
Ifi27l2a_43307	Ifi27l2a	148.29/207.92	36281/2.7851e+05	178.1	157400	9.7794	1778.2	2231.3	3328.3	1	0	0	0	TRUE
Tsc22d3_6416	Tsc22d3	150.3/88.209	6773.4/2.3748e+05	119.26	122130	9.9881	1927.9	1351.1	3319.4	1	0	0	0	TRUE
Ncf1_11391	Ncf1	11.096/4.2004	0/44346	7.6483	22173	11.324	23.776	44.89	3308.2	1	0	0	0	TRUE
Prr30_42955	Prr30	10.088/6.3006	0/45782	8.1941	22891	11.282	7.1702	48.853	3273.9	1	0	0	0	TRUE
Plet1_42834	Plet1	409.55/357.04	93124/4.076e+05	383.29	250360	9.3476	1379	5833.5	3272.9	1	0	0	0	TRUE
Tmem204_73758	Tmem204	10.088/1.0501	5.2589/35818	5.5688	17912	11.413	40.837	30.429	3246.1	1	0	0	0	TRUE
Afap1l2_56913	Afap1l2	7.0613/1.0501	5.2589/29489	4.0557	14747	11.51	18.067	20.655	3243.9	1	0	0	0	TRUE
Aldob_58284	Aldob	3.0263/0	0/16203	1.5131	8101.7	11.655	4.5791	6.2412	3242.3	1	0	0	0	TRUE
Zfp57_19214	Zfp57	26.228/24.152	17044/73342	25.19	45193	10.753	2.1529	195.18	3233	1	0	0	0	TRUE
Mut_11133	Mut	25.219/26.253	29040/62435	25.736	45737	10.74	0.53449	200.43	3228.8	1	0	0	0	TRUE
Esp23_78140	Esp23	30.263/29.403	44048/55702	29.833	49875	10.66	0.36939	240.69	3212.9	1	0	0	0	TRUE
Mettl17_22576	Mettl17	25.219/75.608	15840/1.2222e+05	50.413	69030	10.391	1269.5	461.78	3210	1	0	0	0	TRUE
Olfr430_66220	Olfr430	7.0613/2.1002	2923.9/28502	4.5807	15713	11.459	12.306	23.965	3208.8	1	0	0	0	TRUE
Zcchc12_38785	Zcchc12	67.586/14.702	36.812/1.2128e+05	41.144	60658	10.491	1398.4	358.71	3200.5	1	0	0	0	TRUE
Cyp2c40_3878	Cyp2c40	31.271/39.904	68.366/1.1064e+05	35.588	55355	10.563	37.263	299.57	3196.1	1	0	0	0	TRUE
Pomk_41054	Pomk	0/0	0/8258.8	0.50438	4129.4	11.423	0	1.671	3194.1	1	0	0	0	TRUE
Stat4_16755	Stat4	77.674/66.157	10.518/1.7056e+05	71.915	85286	10.192	66.321	718.68	3178.7	1	0	0	0	TRUE
Atp10b_69652	Atp10b	15.131/10.501	5.2589/58440	12.816	29223	11.047	10.719	84.695	3173.9	1	0	0	0	TRUE
Zfp61_19225	Zfp61	0/0	8167/0	0.50438	4083.5	11.407	0	1.671	3158.6	1	0	0	0	TRUE
Zfp784_76417	Zfp784	64.56/24.152	436.49/1.2478e+05	44.356	62608	10.431	816.39	393.84	3152.6	1	0	0	0	TRUE
Ss18_68134	Ss18	7.0613/7.3508	0/40710	7.206	20355	11.276	0.041904	41.727	3150	1	0	0	0	TRUE
Zbed3_38015	Zbed3	12.105/21.002	67813/0	16.554	33907	10.916	39.58	116.13	3144.8	1	0	0	0	TRUE
Wfdc18_5242	Wfdc18	1.0088/0	5.2589/8124.1	0.50438	4064.7	11.4	0.50879	1.671	3144	1	0	0	0	TRUE
Ctbp2_3691	Ctbp2	382.32/216.32	45042/3.6657e+05	299.32	205810	9.4206	13777	4276.8	3142.4	1	0	0	0	TRUE
Setd5_38962	Setd5	80.7/86.109	220.87/1.847e+05	83.404	92461	10.097	14.627	864.55	3141.7	1	0	0	0	TRUE
Cdk5_2637	Cdk5	3.0263/3.1503	0/24193	3.0883	12096	11.531	0.0076967	14.82	3141.4	1	0	0	0	TRUE
Kdm2b_21671	Kdm2b	236.05/242.57	64647/2.9171e+05	239.31	178180	9.5342	21.302	3230.5	3130.7	1	0	0	0	TRUE
Letm2_68523	Letm2	2.0175/0	0/12254	1.0088	6126.8	11.575	2.0352	3.8296	3130.3	1	0	0	0	TRUE
Defb23_76082	Defb23	33.289/33.603	84.142/1.0404e+05	33.446	52063	10.562	0.049505	277.36	3124.1	1	0	0	0	TRUE
Aldoc_632	Aldoc	59.516/70.357	67151/90084	64.937	78617	10.22	58.763	632.84	3122.6	1	0	0	0	TRUE
Aes_6911	Aes	20.175/28.353	85273/0	24.264	42636	10.721	33.439	186.33	3121.7	1	0	0	0	TRUE
Zfp819_40698	Zfp819	1.0088/2.1002	0/15844	1.5545	7922.1	11.599	0.59565	6.4478	3119.3	1	0	0	0	TRUE
0610009O20Rik_29270	0610009O20Rik	14.123/5.2505	40488/7854.8	9.6865	24171	11.143	39.356	60.005	3119.2	1	0	0	0	TRUE
Dbpht2_73254	Dbpht2	5.0438/0	0/21186	2.5219	10593	11.555	12.72	11.585	3111.4	1	0	0	0	TRUE
Ephb2_5019	Ephb2	26.228/24.152	52.589/86807	25.19	43430	10.695	2.1529	195.18	3106.8	1	0	0	0	TRUE
Scn4a_50029	Scn4a	27.236/13.651	0/76259	20.444	38130	10.796	92.275	150.74	3103.9	1	0	0	0	TRUE
Gfpt1_6351	Gfpt1	24.21/13.651	21209/51438	18.931	36323	10.832	55.742	137.07	3100.9	1	0	0	0	TRUE
Auh_1347	Auh	3.0263/2.1002	0/21320	2.5632	10660	11.547	0.42877	11.816	3100.4	1	0	0	0	TRUE
Zbtb12_51963	Zbtb12	10.088/1.0501	34199/0	5.5688	17099	11.346	40.837	30.429	3098.8	1	0	0	0	TRUE
Irs1_8740	Irs1	7.0613/6.3006	15.777/38197	6.681	19106	11.281	0.28927	38.03	3097.1	1	0	0	0	TRUE
Cyp4a32_77457	Cyp4a32	14.123/11.551	37864/19211	12.837	28537	11.01	3.3059	84.864	3096.4	1	0	0	0	TRUE
Cadm1_23865	Cadm1	76.665/93.46	26394/1.5741e+05	85.062	91902	10.061	141.03	886.04	3084.6	1	0	0	0	TRUE
Ifi30_27260	Ifi30	50.438/43.054	1851.1/1.2447e+05	46.746	63158	10.369	27.255	420.38	3078.1	1	0	0	0	TRUE
Agmat_42343	Agmat	80.7/51.455	49134/1.0754e+05	66.078	78339	10.19	427.63	646.72	3077.9	1	0	0	0	TRUE
Prkd1_13100	Prkd1	0/0	0/7899.7	0.50438	3949.8	11.359	0	1.671	3055.2	1	0	0	0	TRUE
Dram2_30156	Dram2	4.035/3.1503	42.071/25674	3.5927	12858	11.451	0.39133	17.817	3045.3	1	0	0	0	TRUE
Fancc_5362	Fancc	0/0	0/7854.8	0.50438	3927.4	11.351	0	1.671	3037.8	1	0	0	0	TRUE
Rap1gap_49836	Rap1gap	8.07/6.3006	10202/28951	7.1853	19576	11.224	1.5653	41.58	3034.8	1	0	0	0	TRUE
Uevld_23241	Uevld	22.193/28.353	56244/28188	25.273	42216	10.65	18.975	195.97	3013.8	1	0	0	0	TRUE
Myo10_11254	Myo10	232.01/212.12	1.3612e+05/1.9018e+05	222.07	163150	9.5145	197.83	2941.4	3004	1	0	0	0	TRUE
Ankrd53_41532	Ankrd53	33.289/25.203	39636/52425	29.246	46031	10.572	32.693	234.84	3001.9	1	0	0	0	TRUE
Zfp180_52955	Zfp180	2.0175/0	11743/0	1.0088	5871.5	11.513	2.0352	3.8296	2999.9	1	0	0	0	TRUE
Tial1_17632	Tial1	0/0	0/7630.4	0.50438	3815.2	11.309	0	1.671	2951	1	0	0	0	TRUE
Dtna_4529	Dtna	0/0	0/7585.5	0.50438	3792.8	11.3	0	1.671	2933.6	1	0	0	0	TRUE
Rpain_34903	Rpain	17.149/13.651	5.2589/60460	15.4	30232	10.848	6.1158	106.23	2931.8	1	0	0	0	TRUE
Sppl2b_39234	Sppl2b	40.35/9.451	46525/34741	24.901	40633	10.615	477.38	192.4	2927.6	1	0	0	0	TRUE
Guf1_58801	Guf1	42.368/21.002	10.518/94348	31.685	47179	10.495	228.24	259.36	2927.6	1	0	0	0	TRUE
Dusp9_41885	Dusp9	31.271/23.102	21330/64454	27.187	42892	10.572	33.366	214.52	2926.6	1	0	0	0	TRUE
Sprr2e_16611	Sprr2e	24.21/19.952	11601/63557	22.081	37579	10.669	9.0652	165.81	2916.6	1	0	0	0	TRUE
Trap1a_18049	Trap1a	60.525/253.08	65473/1.8887e+05	156.8	127170	9.6545	18538	1902.4	2912.1	1	0	0	0	TRUE
Dnajc7_24553	Dnajc7	63.551/55.656	99.919/1.3887e+05	59.604	69487	10.163	31.17	568.78	2911.1	1	0	0	0	TRUE
Stard5_50919	Stard5	15.131/17.852	0/62479	16.492	31240	10.803	3.7007	115.59	2904.1	1	0	0	0	TRUE
2810474O19Rik_30325	2810474O19Rik	0/1.0501	0/7675.3	0.52505	3837.6	11.298	0.55136	1.753	2898.1	1	0	0	0	TRUE
Adgrf5_56385	Adgrf5	101.88/79.808	49954/1.2976e+05	90.846	89858	9.9342	243.67	961.84	2894.5	1	0	0	0	TRUE
Adh6a_33945	Adh6a	65.569/55.656	64222/73970	60.612	69096	10.131	49.135	580.79	2864.6	1	0	0	0	TRUE
3110062M04Rik_44178	3110062M04Rik	325.83/86.109	17943/2.7851e+05	205.97	148230	9.4842	28732	2676.7	2861	1	0	0	0	TRUE
Btbd17_37816	Btbd17	16.14/13.651	5.2589/57452	14.896	28729	10.82	3.0966	101.95	2843.8	1	0	0	0	TRUE
Eda2r_63430	Eda2r	11.096/10.501	36.812/47084	10.799	23560	10.964	0.17712	68.588	2843.5	1	0	0	0	TRUE
Lao1_46892	Lao1	2.0175/14.702	24380/15844	8.3595	20112	11.069	80.442	50.067	2841.2	1	0	0	0	TRUE
Aven_40477	Aven	2.0175/1.0501	0/14273	1.5338	7136.7	11.46	0.46793	6.3443	2832.8	1	0	0	0	TRUE
Vmn1r210_51576	Vmn1r210	67.586/82.959	94.66/1.5588e+05	75.272	77990	9.9979	118.15	760.73	2824.9	1	0	0	0	TRUE
Fam151a_58365	Fam151a	129.12/247.83	1.4649e+05/1.3026e+05	188.47	138370	9.5123	7045.5	2395.1	2823.5	1	0	0	0	TRUE
Pou2f2_13431	Pou2f2	170.48/88.209	48729/1.698e+05	129.34	109260	9.7113	3384.2	1495.4	2822.2	1	0	0	0	TRUE
Slc5a8_54636	Slc5a8	28.245/21.002	31.553/77426	24.624	38729	10.562	26.23	189.76	2809.7	1	0	0	0	TRUE
Scn8a_15327	Scn8a	6.0525/17.852	42082/7450.9	11.952	24766	10.901	69.612	77.717	2808	1	0	0	0	TRUE
Susd2_37154	Susd2	44.385/40.954	19416/89051	42.67	54233	10.278	5.8854	375.31	2797.2	1	0	0	0	TRUE
Ccdc22_23778	Ccdc22	6.0525/3.1503	3465.6/23968	4.6014	13717	11.258	4.2113	24.097	2793.4	1	0	0	0	TRUE
Lce1k_76174	Lce1k	9.0788/11.551	68.366/44885	10.315	22477	10.956	3.0564	64.828	2790.3	1	0	0	0	TRUE
Rnf165_56695	Rnf165	21.184/31.503	51290/28771	26.344	40030	10.516	53.246	206.31	2785.1	1	0	0	0	TRUE
Golim4_39150	Golim4	5.0438/12.601	8913.8/31778	8.8225	20346	11.016	28.558	53.495	2780.6	1	0	0	0	TRUE
Gspt1_7018	Gspt1	8.07/2.1002	5911/23116	5.0851	14513	11.22	17.819	27.228	2780.4	1	0	0	0	TRUE
Musk_11959	Musk	93.814/79.808	37149/1.303e+05	86.811	83724	9.897	98.079	908.83	2774.4	1	0	0	0	TRUE
Eml3_56762	Eml3	8.07/6.3006	0/35638	7.1853	17819	11.088	1.5653	41.58	2762.3	1	0	0	0	TRUE
Fcer1a_5430	Fcer1a	19.166/15.752	0/61537	17.459	30768	10.703	5.8299	124.03	2761.2	1	0	0	0	TRUE
Chat_2798	Chat	9.0788/4.2004	3239.5/30656	6.6396	16948	11.115	11.899	37.742	2757.6	1	0	0	0	TRUE
Galp_59433	Galp	45.394/27.303	8856/87615	36.348	48235	10.335	163.64	307.54	2748.5	1	0	0	0	TRUE
Kif9_9261	Kif9	7.0613/13.651	0/44256	10.356	22128	10.928	21.715	65.148	2740.3	1	0	0	0	TRUE
Irx3_8760	Irx3	4.035/0	0/16293	2.0175	8146.6	11.399	8.1406	8.8382	2739.6	1	0	0	0	TRUE
Bbox1_50908	Bbox1	7.0613/12.601	21782/20871	9.8313	21327	10.943	15.346	61.109	2726.9	1	0	0	0	TRUE
Prlhr_56931	Prlhr	4.035/9.451	0/33753	6.743	16877	11.09	14.666	38.463	2720.1	1	0	0	0	TRUE
Mier1_36560	Mier1	16.14/3.1503	42.071/41922	9.6452	20982	10.945	84.366	59.69	2714.6	1	0	0	0	TRUE
Ano2_62803	Ano2	33.289/25.203	6531.5/76708	29.246	41620	10.426	32.693	234.84	2714	1	0	0	0	TRUE
Ppp1r3g_42804	Ppp1r3g	4.035/9.451	0/33529	6.743	16764	11.08	14.666	38.463	2702	1	0	0	0	TRUE
Lppr4_58165	Lppr4	5.0438/3.1503	1135.9/23520	4.097	12328	11.24	1.7925	20.913	2694.8	1	0	0	0	TRUE
Wdr34_37343	Wdr34	21.184/7.3508	57.848/52829	14.267	26444	10.758	95.676	96.669	2688.1	1	0	0	0	TRUE
Adam17_246	Adam17	0/2.1002	3276.3/7495.7	1.0501	5386	11.36	2.2055	4.0191	2686.1	1	0	0	0	TRUE
Plac1_24165	Plac1	46.403/30.453	12553/84832	38.428	48692	10.27	127.19	329.53	2680.2	1	0	0	0	TRUE
Phf19_39949	Phf19	82.718/93.46	10297/1.5288e+05	88.089	81587	9.8389	57.695	925.54	2678.9	1	0	0	0	TRUE
Setdb1_45517	Setdb1	80.7/33.603	646.84/1.2384e+05	57.152	62242	10.064	1109	539.8	2676.5	1	0	0	0	TRUE
Btnl4_76191	Btnl4	8.07/21.002	14930/38107	14.536	26519	10.737	83.62	98.921	2664.8	1	0	0	0	TRUE
Rpain_34904	Rpain	38.333/31.503	31.553/91071	34.918	45551	10.309	23.32	292.59	2661	1	0	0	0	TRUE
Spata9_41854	Spata9	3.0263/0	0/13286	1.5131	6642.9	11.368	4.5791	6.2412	2658.4	1	0	0	0	TRUE
Mei4_41340	Mei4	5.0438/3.1503	21.036/24283	4.097	12152	11.219	1.7925	20.913	2656.4	1	0	0	0	TRUE
Zbtb45_59460	Zbtb45	6.0525/14.702	0/42955	10.377	21477	10.883	37.403	65.308	2656.4	1	0	0	0	TRUE
Gnb3_6638	Gnb3	26.228/36.754	31.553/84742	31.491	42387	10.349	55.401	257.39	2640.1	1	0	0	0	TRUE
1700019L03Rik_57494	1700019L03Rik	1.0088/0	0/6822.5	0.50438	3411.2	11.147	0.50879	1.671	2638.5	1	0	0	0	TRUE
AU040320_46862	AU040320	14.123/28.353	23923/42147	21.238	33035	10.537	101.25	158.01	2626.3	1	0	0	0	TRUE
Aebp2_437	Aebp2	6.0525/7.3508	14904/17550	6.7016	16227	11.041	0.84272	38.174	2625.2	1	0	0	0	TRUE
Vwde_59365	Vwde	4.035/7.3508	5.2589/29310	5.6929	14657	11.097	5.4971	31.26	2620.6	1	0	0	0	TRUE
Gm8909_76833	Gm8909	0/1.0501	0/6912.2	0.52505	3456.1	11.146	0.55136	1.753	2610	1	0	0	0	TRUE
Dytn_62020	Dytn	11.096/40.954	31.553/74419	26.025	37225	10.428	445.75	203.23	2609.4	1	0	0	0	TRUE
Crkl_3446	Crkl	1.0088/0	0/6732.7	0.50438	3366.3	11.128	0.50879	1.671	2603.8	1	0	0	0	TRUE
Smagp_52292	Smagp	1.0088/3.1503	0/15755	2.0795	7877.3	11.321	2.2932	9.1685	2600.8	1	0	0	0	TRUE
Glrx2_34341	Glrx2	3.0263/2.1002	0/17819	2.5632	8909.6	11.288	0.42877	11.816	2591.2	1	0	0	0	TRUE
Pak1_12498	Pak1	8.07/0	5.2589/23430	4.035	11718	11.185	32.563	20.527	2585.4	1	0	0	0	TRUE
Cfi_2773	Cfi	180.57/81.908	7157.3/1.948e+05	131.24	100980	9.5767	4866.7	1522.8	2584.3	1	0	0	0	TRUE
Mc4r_10441	Mc4r	1836.9/1624.5	1.8299e+05/8.3858e+05	1730.7	510790	8.2044	22561	38914	2580.5	1	0	0	0	TRUE
P2rx4_12433	P2rx4	3.0263/137.56	33115/1.0323e+05	70.295	68175	9.9012	9050.2	698.55	2576.8	1	0	0	0	TRUE
Pmp22_13330	Pmp22	9.0788/16.802	5.2589/47668	12.94	23836	10.74	29.822	85.707	2573.3	1	0	0	0	TRUE
Ccl4_15407	Ccl4	46.403/52.505	17959/91385	49.454	54672	10.082	18.622	450.88	2572.4	1	0	0	0	TRUE
Eif4enif1_40366	Eif4enif1	28.245/27.303	17554/58844	27.774	38199	10.375	0.4439	220.28	2571.9	1	0	0	0	TRUE
Rassf10_44343	Rassf10	41.359/14.702	6410.6/70200	28.03	38305	10.366	355.31	222.8	2564.4	1	0	0	0	TRUE
Glod4_30212	Glod4	0/4.2004	0/15620	2.1002	7809.9	11.299	8.8218	9.2791	2563.2	1	0	0	0	TRUE
Eri3_50754	Eri3	7.0613/24.152	21.036/53233	15.607	26627	10.647	146.05	107.99	2560.8	1	0	0	0	TRUE
Gbp4_10862	Gbp4	7.0613/16.802	26.294/45019	11.931	22523	10.766	47.438	77.551	2556.2	1	0	0	0	TRUE
Mmgt1_60777	Mmgt1	64.56/36.754	6889.1/1.0332e+05	50.657	55107	10.059	386.6	464.56	2554.4	1	0	0	0	TRUE
2810007J24Rik_43363	2810007J24Rik	13.114/28.353	0/63198	20.733	31599	10.506	116.12	153.38	2549.7	1	0	0	0	TRUE
D5Ertd579e_70232	D5Ertd579e	137.19/159.62	29786/1.8528e+05	148.4	107540	9.4914	251.47	1775.8	2548.3	1	0	0	0	TRUE
Igf2bp3_50714	Igf2bp3	50.438/160.67	24564/1.4897e+05	105.55	86768	9.6695	6075.2	1160	2544.5	1	0	0	0	TRUE
Ubr4_33940	Ubr4	584.07/320.28	1.4294e+05/2.8879e+05	452.17	215860	8.8959	34791	7179.4	2542.3	1	0	0	0	TRUE
Pcdhga3_45703	Pcdhga3	4.035/1.0501	26.294/17370	2.5426	8698.3	11.262	4.4548	11.7	2542.2	1	0	0	0	TRUE
Ap5m1_40671	Ap5m1	6.0525/6.3006	29849/0	6.1766	14925	11.022	0.030787	34.543	2538.3	1	0	0	0	TRUE
Zic4_19313	Zic4	6.0525/15.752	57.848/42192	10.902	21125	10.794	47.036	69.397	2534.5	1	0	0	0	TRUE
Zfp846_63219	Zfp846	0/0	0/6553.2	0.50438	3276.6	11.089	0	1.671	2534.3	1	0	0	0	TRUE
Nipsnap1_11660	Nipsnap1	13.114/13.651	12306/35549	13.383	23927	10.7	0.14453	89.332	2530.1	1	0	0	0	TRUE
Olfr1264_64466	Olfr1264	55.481/103.96	94997/49598	79.721	72297	9.8068	1175.1	817.2	2526.3	1	0	0	0	TRUE
control_79036	control	85.744/119.71	81681/87435	102.73	84558	9.671	576.93	1121.3	2522.1	1	0	0	0	TRUE
Kcnh2_9051	Kcnh2	25.219/47.255	57.848/88288	36.237	44173	10.212	242.79	306.37	2521.6	1	0	0	0	TRUE
Hr_7945	Hr	13.114/24.152	50159/8303.7	18.633	29231	10.54	60.927	134.41	2519.7	1	0	0	0	TRUE
Gprin3_62743	Gprin3	1.0088/0	0/6508.3	0.50438	3254.1	11.079	0.50879	1.671	2517	1	0	0	0	TRUE
Olfr633_64911	Olfr633	50.438/31.503	22235/72175	40.97	47205	10.135	179.25	356.83	2496.8	1	0	0	0	TRUE
Hcn3_7421	Hcn3	35.306/15.752	13431/56959	25.529	35195	10.374	191.19	198.44	2496.6	1	0	0	0	TRUE
Ppm1h_69439	Ppm1h	27.236/27.303	26642/46635	27.27	36638	10.34	0.0022125	215.33	2494.9	1	0	0	0	TRUE
control_78959	control	20.175/51.455	51337/35324	35.815	43331	10.201	489.23	301.95	2491.5	1	0	0	0	TRUE
A430005L14Rik_46306	A430005L14Rik	97.849/63.006	3570.8/1.3973e+05	80.428	71648	9.7812	607	826.24	2489.8	1	0	0	0	TRUE
Btbd11_39926	Btbd11	11.096/13.651	57.848/44705	12.374	22381	10.709	3.2644	81.108	2483.8	1	0	0	0	TRUE
Gdi1_6314	Gdi1	17.149/12.601	3202.7/46904	14.875	25054	10.624	10.34	101.77	2481.9	1	0	0	0	TRUE
Psme3_13907	Psme3	5.0438/8.4009	30712/0	6.7223	15356	10.958	5.6351	38.319	2479.6	1	0	0	0	TRUE
Apoa1bp_63738	Apoa1bp	1.0088/1.0501	173.54/9650.2	1.0294	4911.9	11.241	0.00085518	3.9242	2479	1	0	0	0	TRUE
Cfl2_2774	Cfl2	21.184/15.752	15.777/57183	18.468	28599	10.521	14.754	132.94	2478.9	1	0	0	0	TRUE
Sdr39u1_76413	Sdr39u1	13.114/19.952	12832/40441	16.533	26636	10.569	23.381	115.95	2472.1	1	0	0	0	TRUE
Olfr623_67648	Olfr623	1.0088/0	5.2589/6373.6	0.50438	3189.4	11.05	0.50879	1.671	2466.9	1	0	0	0	TRUE
control_78939	control	31.271/78.758	18091/93899	55.015	55995	9.9653	1127.5	514.79	2465.5	1	0	0	0	TRUE
Grhpr_42528	Grhpr	15.131/10.501	15.777/45334	12.816	22675	10.681	10.719	84.695	2462.4	1	0	0	0	TRUE
Phkb_47278	Phkb	150.3/141.76	56365/1.492e+05	146.03	102780	9.4492	36.46	1740.4	2460.2	1	0	0	0	TRUE
Il22_22215	Il22	19.166/13.651	47.33/52695	16.409	26371	10.565	15.207	114.88	2458.9	1	0	0	0	TRUE
Dtx1_5923	Dtx1	18.158/12.601	41109/9560.4	15.379	25335	10.595	15.436	106.05	2458.6	1	0	0	0	TRUE
Trim50_54266	Trim50	18.158/13.651	94.66/51483	15.904	25789	10.575	10.153	110.54	2451.4	1	0	0	0	TRUE
Cyp26b1_59189	Cyp26b1	48.42/27.303	24002/64140	37.861	44071	10.147	222.97	323.51	2448.1	1	0	0	0	TRUE
Actr1b_57188	Actr1b	8.07/17.852	52.589/45334	12.961	22693	10.667	47.842	85.876	2447.4	1	0	0	0	TRUE
Gpbp1_39291	Gpbp1	14.123/3.1503	0/35324	8.6364	17662	10.84	60.195	52.112	2445.5	1	0	0	0	TRUE
Tcaf3_73469	Tcaf3	260.26/46.205	1.0643e+05/1.0368e+05	153.23	105060	9.4119	22909	1848.4	2440.1	1	0	0	0	TRUE
Myog_11298	Myog	10.088/11.551	5.2589/40396	10.819	20201	10.739	1.0712	68.75	2435	1	0	0	0	TRUE
Rspo1_51810	Rspo1	164.43/44.105	38432/1.2617e+05	104.27	82301	9.6108	7238.7	1142.3	2432	1	0	0	0	TRUE
Aup1_1353	Aup1	12.105/0	28203/0	6.0525	14102	10.966	73.266	33.695	2428.3	1	0	0	0	TRUE
Hoxa11_7766	Hoxa11	53.464/67.207	52620/63871	60.335	58246	9.8912	94.436	577.49	2421.3	1	0	0	0	TRUE
Ska2_27555	Ska2	0/0	6231.8/0	0.50438	3115.9	11.017	0	1.671	2410	1	0	0	0	TRUE
Lrfn3_59609	Lrfn3	31.271/30.453	36870/39498	30.862	38184	10.227	0.33469	251.04	2408.1	1	0	0	0	TRUE
Mrpl51_28510	Mrpl51	0/9.451	0/23924	4.7255	11962	11.029	44.66	24.893	2396.5	1	0	0	0	TRUE
Medag_36083	Medag	33.289/90.309	55145/61716	61.799	58431	9.8618	1625.7	594.99	2392.9	1	0	0	0	TRUE
Hcn3_7418	Hcn3	54.473/10.501	8056.6/69885	32.487	38971	10.185	966.75	267.53	2380.6	1	0	0	0	TRUE
Havcr2_51625	Havcr2	0/0	6152.9/0	0.50438	3076.4	10.998	0	1.671	2379.5	1	0	0	0	TRUE
Ank2_49561	Ank2	7.0613/6.3006	5.2589/29265	6.681	14635	10.896	0.28927	38.03	2372.1	1	0	0	0	TRUE
1110032F04Rik_33311	1110032F04Rik	36.315/46.205	10486/79536	41.26	45011	10.057	48.903	359.97	2370.2	1	0	0	0	TRUE
Zfp629_70250	Zfp629	40.35/103.96	11270/1.1621e+05	72.155	63738	9.767	2023.2	721.67	2369.9	1	0	0	0	TRUE
Vmn1r174_73567	Vmn1r174	115/34.654	6021.4/1.2424e+05	74.826	65131	9.7465	3227.6	755.11	2367.5	1	0	0	0	TRUE
Bsph1_71180	Bsph1	54.473/108.16	38989/97534	81.317	68262	9.6957	1441.2	837.65	2355.8	1	0	0	0	TRUE
Pdss2_36749	Pdss2	7.0613/7.3508	0/30432	7.206	15216	10.857	0.041904	41.727	2354.4	1	0	0	0	TRUE
Ddit3_4106	Ddit3	45.394/43.054	47.33/93315	44.224	46681	10.012	2.7364	392.38	2354.4	1	0	0	0	TRUE
Vps13b_76608	Vps13b	6.0525/3.1503	5.2589/23116	4.6014	11560	11.011	4.2113	24.097	2354.1	1	0	0	0	TRUE
Olfr1031_64045	Olfr1031	22.193/26.253	12032/52111	24.223	32072	10.312	8.2425	185.94	2350.2	1	0	0	0	TRUE
Hamp_45521	Hamp	4.035/3.1503	19826/0	3.5927	9913	11.076	0.39133	17.817	2347.6	1	0	0	0	TRUE
Chst7_26608	Chst7	20.175/19.952	16907/40082	20.064	28495	10.402	0.024859	147.28	2346.3	1	0	0	0	TRUE
Madcam1_10196	Madcam1	10.088/10.501	7709.5/29848	10.294	18779	10.699	0.085518	64.668	2333.9	1	0	0	0	TRUE
Naip1_11336	Naip1	7.0613/4.2004	36.812/25809	5.6308	12923	10.929	4.0922	30.844	2325.8	1	0	0	0	TRUE
Spata13_55800	Spata13	22.193/52.505	16439/66429	37.349	41434	10.077	459.43	318.09	2321.1	1	0	0	0	TRUE
A2m_59267	A2m	3.0263/0	3686.5/7899.7	1.5131	5793.1	11.171	4.5791	6.2412	2318.3	1	0	0	0	TRUE
Dock3_52595	Dock3	113.99/55.656	1.1384e+05/23924	84.822	68881	9.6486	1701.4	882.93	2315.3	1	0	0	0	TRUE
Rnft2_68399	Rnft2	96.84/64.057	10523/1.224e+05	80.448	66462	9.6724	537.38	826.5	2309	1	0	0	0	TRUE
Defa20_32097	Defa20	0/0	0/5969.7	0.50438	2984.8	10.955	0	1.671	2308.6	1	0	0	0	TRUE
Cep97_40355	Cep97	1.0088/0	5968.8/0	0.50438	2984.4	10.955	0.50879	1.671	2308.3	1	0	0	0	TRUE
Mfsd6l_54447	Mfsd6l	25.219/21.002	21.036/61088	23.11	30555	10.308	8.89	175.43	2305.1	1	0	0	0	TRUE
Tmem154_70329	Tmem154	15.131/8.4009	5669.1/34561	11.766	20115	10.622	22.649	76.229	2302.5	1	0	0	0	TRUE
Lysmd3_44721	Lysmd3	1.0088/0	5947.8/0	0.50438	2973.9	10.949	0.50879	1.671	2300.2	1	0	0	0	TRUE
Tmem138_39048	Tmem138	541.7/280.38	27194/3.4041e+05	411.04	183800	8.8011	34144	6368.7	2298	1	0	0	0	TRUE
Trim58_54831	Trim58	14.123/12.601	0/43403	13.362	21702	10.561	1.1571	89.162	2296.9	1	0	0	0	TRUE
Vmn2r23_74542	Vmn2r23	94.823/24.152	13952/95380	59.488	54666	9.8198	2497.1	567.4	2292.4	1	0	0	0	TRUE
Vmn2r103_75966	Vmn2r103	5.0438/5.2505	42.071/24013	5.1471	12028	10.934	0.02138	27.635	2287	1	0	0	0	TRUE
Gm10057_75798	Gm10057	2.0175/0	0/8932	1.0088	4466	11.119	2.0352	3.8296	2281.6	1	0	0	0	TRUE
Olfr739_66025	Olfr739	105.92/71.407	105.18/1.3941e+05	88.663	69758	9.6037	595.52	933.08	2280.8	1	0	0	0	TRUE
Slc25a40_69588	Slc25a40	9.0788/45.155	39179/27335	27.117	33257	10.208	650.73	213.84	2272.4	1	0	0	0	TRUE
Plekhg5_68351	Plekhg5	24.21/34.654	31990/37793	29.432	34891	10.163	54.534	236.69	2266	1	0	0	0	TRUE
Il1f10_54320	Il1f10	0/1.0501	5.2589/5969.7	0.52505	2987.5	10.936	0.55136	1.753	2256	1	0	0	0	TRUE
Oprd1_12314	Oprd1	19.166/35.704	136.73/66340	27.435	33238	10.191	136.74	216.95	2254.7	1	0	0	0	TRUE
Bmx_1670	Bmx	20.175/22.052	5.2589/56510	21.114	28258	10.32	1.762	156.87	2254.4	1	0	0	0	TRUE
S100a1_15144	S100a1	3.0263/4.2004	3050.2/15979	3.6133	9514.5	11.01	0.68935	17.942	2245.3	1	0	0	0	TRUE
Pex2_14227	Pex2	91.796/32.553	18958/90802	62.175	54880	9.7627	1754.9	599.49	2238.9	1	0	0	0	TRUE
Oxtr_12417	Oxtr	0/2.1002	0/8976.9	1.0501	4488.5	11.097	2.2055	4.0191	2238.4	1	0	0	0	TRUE
Hand2_7343	Hand2	172.5/183.77	59452/1.5184e+05	178.13	105650	9.204	63.534	2231.7	2232.6	1	0	0	0	TRUE
Ttyh3_44129	Ttyh3	0/4.2004	0/13600	2.1002	6800	11.099	8.8218	9.2791	2231.6	1	0	0	0	TRUE
Csad_63704	Csad	3.0263/0	0/11087	1.5131	5543.3	11.107	4.5791	6.2412	2218.3	1	0	0	0	TRUE
4930564B18Rik_41493	4930564B18Rik	12.105/7.3508	34414/0	9.7279	17207	10.648	11.301	60.32	2214.3	1	0	0	0	TRUE
Fahd2a_32353	Fahd2a	20.175/31.503	27367/35504	25.839	31436	10.194	64.164	201.43	2213.1	1	0	0	0	TRUE
Parp6_30426	Parp6	16.14/27.303	21609/34830	21.721	28220	10.278	62.304	162.48	2212.2	1	0	0	0	TRUE
Crhr1_3431	Crhr1	16.14/6.3006	17459/20063	11.22	18761	10.584	48.407	71.899	2211.3	1	0	0	0	TRUE
Dmrtc2_36639	Dmrtc2	0/0	5711.1/0	0.50438	2855.6	10.891	0	1.671	2208.6	1	0	0	0	TRUE
Vmn1r88_78227	Vmn1r88	83.726/21.002	5947.8/91026	52.364	48487	9.8275	1967.2	484.12	2201.3	1	0	0	0	TRUE
Cdkn2d_2681	Cdkn2d	20.175/30.453	12989/48475	25.314	30732	10.19	52.82	196.37	2191.3	1	0	0	0	TRUE
2310050C09Rik_28605	2310050C09Rik	29.254/39.904	0/74194	34.579	37097	10.026	56.715	289.07	2179.9	1	0	0	0	TRUE
Uggt1_69803	Uggt1	138.2/45.155	11354/1.2455e+05	91.677	67954	9.5182	4328.6	972.82	2175.8	1	0	0	0	TRUE
Cdca7_29572	Cdca7	9.0788/50.405	52531/14857	29.742	33694	10.098	853.94	239.79	2174	1	0	0	0	TRUE
Gabra1_6019	Gabra1	33.289/86.109	1514.6/1.0229e+05	59.699	51903	9.74	1395	569.91	2171.7	1	0	0	0	TRUE
Chrnb4_48857	Chrnb4	57.499/24.152	0/81914	40.826	40957	9.9356	555.99	355.26	2170.8	1	0	0	0	TRUE
Fis1_28373	Fis1	13.114/4.2004	26.294/31329	8.6571	15678	10.665	39.724	52.265	2167.4	1	0	0	0	TRUE
Erbb2_5096	Erbb2	53.464/24.152	31.553/78907	38.808	39469	9.9535	429.58	333.59	2158.9	1	0	0	0	TRUE
4833427G06Rik_60472	4833427G06Rik	1.0088/5.2505	5.2589/16742	3.1296	8373.6	10.986	8.9964	15.062	2156.8	1	0	0	0	TRUE
Ints5_49319	Ints5	2.0175/1.0501	10796/0	1.5338	5398.2	11.057	0.46793	6.3443	2142.6	1	0	0	0	TRUE
Pcdhb18_45940	Pcdhb18	5.0438/0	0/14588	2.5219	7293.8	11.016	12.72	11.585	2142.2	1	0	0	0	TRUE
Scmh1_21552	Scmh1	1.0088/0	5506.1/0	0.50438	2753	10.838	0.50879	1.671	2129.3	1	0	0	0	TRUE
Pcdhb7_45893	Pcdhb7	38.333/35.704	5.2589/75541	37.018	37773	9.9565	3.4555	314.59	2127.6	1	0	0	0	TRUE
Srsf9_48855	Srsf9	79.691/78.758	6615.7/1.1455e+05	79.225	60581	9.5606	0.43549	810.86	2124.7	1	0	0	0	TRUE
Pde4d_61340	Pde4d	30.263/43.054	8493.1/66025	36.658	37259	9.9504	81.816	310.8	2111.4	1	0	0	0	TRUE
Tas2r143_73357	Tas2r143	21.184/21.002	6968/45827	21.093	26398	10.223	0.016493	156.68	2107.2	1	0	0	0	TRUE
Ccdc82_28253	Ccdc82	8.07/30.453	14977/34786	19.262	24881	10.262	250.5	140.04	2101	1	0	0	0	TRUE
Muc4_50679	Muc4	104.91/52.505	12758/1.0615e+05	78.708	59455	9.5429	1373.1	804.26	2093.7	1	0	0	0	TRUE
Endov_71626	Endov	22.193/21.002	15.777/53188	21.597	26602	10.201	0.70849	161.33	2092.7	1	0	0	0	TRUE
2700097O09Rik_38743	2700097O09Rik	35.306/50.405	15.777/81331	42.856	40673	9.8571	113.99	377.35	2091.6	1	0	0	0	TRUE
Olfr786_65605	Olfr786	14.123/12.601	39452/0	13.362	19726	10.424	1.1571	89.162	2087.6	1	0	0	0	TRUE
Gm12886_76676	Gm12886	1.0088/0	0/5386.2	0.50438	2693.1	10.806	0.50879	1.671	2082.9	1	0	0	0	TRUE
Nupr1_24454	Nupr1	45.394/73.508	49875/49059	59.451	49467	9.6765	395.19	566.96	2075	1	0	0	0	TRUE
Tmc5_40739	Tmc5	69.604/54.606	52.589/1.0139e+05	62.105	50724	9.6507	112.47	598.65	2070.6	1	0	0	0	TRUE
H2-M10.3_49944	H2-M10.3	0/1.0501	0/5475.9	0.52505	2738	10.811	0.55136	1.753	2067.6	1	0	0	0	TRUE
Uba6_58830	Uba6	133.16/100.81	57101/93046	116.98	75073	9.3136	523.09	1319	2063.9	1	0	0	0	TRUE
Sectm1b_26107	Sectm1b	26.228/51.455	3460.3/71995	38.841	37728	9.8872	318.22	333.94	2062.4	1	0	0	0	TRUE
Vmn1r94_75453	Vmn1r94	0/1.0501	5458.7/0	0.52505	2729.4	10.806	0.55136	1.753	2061.1	1	0	0	0	TRUE
Ces1c_5137	Ces1c	55.481/56.706	194.58/94392	56.094	47294	9.6941	0.74971	527.39	2056.9	1	0	0	0	TRUE
Sorcs3_28915	Sorcs3	14.123/19.952	45105/44.885	17.037	22575	10.29	16.992	120.34	2056.4	1	0	0	0	TRUE
Btbd11_39923	Btbd11	3.0263/0	2839.8/7406	1.5131	5122.9	10.994	4.5791	6.2412	2050	1	0	0	0	TRUE
Tmem176b_27237	Tmem176b	60.525/71.407	0/1.0427e+05	65.966	52134	9.6046	59.212	645.36	2049.6	1	0	0	0	TRUE
Patl1_56787	Patl1	23.201/30.453	51290/8213.9	26.827	29752	10.062	26.295	211.01	2046.3	1	0	0	0	TRUE
Zfp36_19168	Zfp36	18.158/61.956	21577/54580	40.057	38078	9.8572	959.17	346.97	2042.1	1	0	0	0	TRUE
Snd1_24880	Snd1	17.149/48.305	10.518/66878	32.727	33444	9.9537	485.35	269.98	2033.4	1	0	0	0	TRUE
Zc2hc1b_41397	Zc2hc1b	82.718/51.455	63501/40935	67.086	52218	9.583	488.67	659.05	2031.4	1	0	0	0	TRUE
Slc43a3_26101	Slc43a3	8.07/14.702	0/34741	11.386	17370	10.454	21.988	73.207	2028.8	1	0	0	0	TRUE
Apol10a_63356	Apol10a	32.28/29.403	17023/47219	30.842	32121	9.9784	4.1386	250.83	2026.2	1	0	0	0	TRUE
Mpzl3_69631	Mpzl3	11.096/24.152	13147/32227	17.624	22687	10.251	85.232	125.48	2023.8	1	0	0	0	TRUE
Trhr2_51041	Trhr2	56.49/36.754	73.624/82812	46.622	41443	9.7653	194.76	419	2022.4	1	0	0	0	TRUE
Ppp1r3a_50721	Ppp1r3a	47.411/33.603	31085/44660	40.507	37873	9.8336	95.328	351.83	2017	1	0	0	0	TRUE
Vps53_32684	Vps53	1.0088/1.0501	0/7989.5	1.0294	3994.7	10.943	0.00085518	3.9242	2016.1	1	0	0	0	TRUE
Klrd1_9422	Klrd1	2.0175/0	21.036/7854.8	1.0088	3937.9	10.937	2.0352	3.8296	2011.8	1	0	0	0	TRUE
Ogg1_12100	Ogg1	29.254/51.455	55902/19031	40.355	37467	9.8234	246.45	350.18	2000	1	0	0	0	TRUE
Hypk_31307	Hypk	6.0525/5.2505	3139.6/19121	5.6515	11130	10.709	0.32158	30.983	1998.6	1	0	0	0	TRUE
Foxp2_50241	Foxp2	87.761/136.51	5.2589/1.4148e+05	112.14	70741	9.2883	1188.4	1251.1	1996.8	1	0	0	0	TRUE
Xylt1_59830	Xylt1	28.245/34.654	36428/27604	31.449	32016	9.9464	20.535	256.97	1995.3	1	0	0	0	TRUE
Cryz_3570	Cryz	107.94/53.556	2976.5/1.1194e+05	80.746	57459	9.4572	1478.6	830.32	1991.3	1	0	0	0	TRUE
Socs6_23701	Socs6	26.228/19.952	19379/32811	23.09	26095	10.081	19.691	175.24	1969.5	1	0	0	0	TRUE
Opn4_21574	Opn4	0/2.1002	42.071/7854.8	1.0501	3948.4	10.912	2.2055	4.0191	1969	1	0	0	0	TRUE
Mau2_40927	Mau2	1.0088/6.3006	42.071/16697	3.6547	8369.6	10.812	14.002	18.193	1961.4	1	0	0	0	TRUE
Olfr800_65603	Olfr800	40.35/48.305	42.071/77830	44.328	38936	9.7465	31.64	393.52	1960.5	1	0	0	0	TRUE
Gm2927_77438	Gm2927	1.0088/1.0501	0/7765	1.0294	3882.5	10.902	0.00085518	3.9242	1959.4	1	0	0	0	TRUE
Ropn1_42652	Ropn1	12.105/9.451	5.2589/32362	10.778	16184	10.424	3.522	68.427	1955.1	1	0	0	0	TRUE
Gm3646_77652	Gm3646	4.035/3.1503	52.589/16428	3.5927	8240.2	10.809	0.39133	17.817	1951.3	1	0	0	0	TRUE
Prps1_13786	Prps1	44.385/63.006	49560/37703	53.696	43631	9.6398	173.38	499.48	1949.9	1	0	0	0	TRUE
Kiss1_69084	Kiss1	8.07/4.2004	26.294/22801	6.1352	11414	10.644	7.4868	34.26	1949	1	0	0	0	TRUE
Mgam_59381	Mgam	33.289/17.852	6447.4/48565	25.57	27506	10.016	119.15	198.83	1948.9	1	0	0	0	TRUE
Rnf17_21606	Rnf17	35.306/82.959	38600/53862	59.132	46231	9.5865	1135.4	563.19	1945.6	1	0	0	0	TRUE
Tlcd2_71963	Tlcd2	27.236/31.503	27246/32541	29.37	29894	9.943	9.1034	236.07	1943.7	1	0	0	0	TRUE
C1qtnf6_38795	C1qtnf6	102.89/176.42	21667/1.3622e+05	139.66	78946	9.1326	2703	1645.9	1942.5	1	0	0	0	TRUE
Sec1_25078	Sec1	56.49/65.107	10644/83216	60.798	46930	9.5688	37.123	583.01	1941.1	1	0	0	0	TRUE
Sipa1l2_63191	Sipa1l2	23.201/14.702	47.33/45423	18.951	22735	10.154	36.123	137.25	1939	1	0	0	0	TRUE
Nxf7_51022	Nxf7	3.0263/2.1002	15.777/13286	2.5632	6650.8	10.866	0.42877	11.816	1934.1	1	0	0	0	TRUE
Mreg_72266	Mreg	5.0438/0	3686.5/9470.7	2.5219	6578.6	10.867	12.72	11.585	1932.1	1	0	0	0	TRUE
Tmem254c_77248	Tmem254c	0/5.2505	0/13465	2.6253	6732.7	10.859	13.784	12.164	1929.6	1	0	0	0	TRUE
Lnx1_9936	Lnx1	59.516/111.31	20510/94796	85.414	57653	9.3819	1341.4	890.61	1929	1	0	0	0	TRUE
Pradc1_39342	Pradc1	2.0175/3.1503	0/13331	2.5839	6665.4	10.861	0.64164	11.932	1928.9	1	0	0	0	TRUE
Fasl_5375	Fasl	7.0613/1.0501	0/17505	4.0557	8752.5	10.758	18.067	20.655	1924.9	1	0	0	0	TRUE
Ccdc96_29027	Ccdc96	0/2.1002	0/7720.2	1.0501	3860.1	10.879	2.2055	4.0191	1924.9	1	0	0	0	TRUE
Cd86_2520	Cd86	6.0525/15.752	15351/16742	10.902	16046	10.397	47.036	69.397	1924.9	1	0	0	0	TRUE
C86695_46337	C86695	27.236/11.551	26.294/45693	19.394	22859	10.131	123.01	141.23	1921.9	1	0	0	0	TRUE
Rit2_14748	Rit2	50.438/76.658	10565/84967	63.548	47766	9.5314	343.75	616.03	1921.9	1	0	0	0	TRUE
Olfr570_67612	Olfr570	9.0788/13.651	0/32766	11.365	16383	10.372	10.455	73.043	1915.6	1	0	0	0	TRUE
Try10_74607	Try10	14.123/29.403	24827/24058	21.763	24443	10.069	116.75	162.86	1913.6	1	0	0	0	TRUE
Ppp1r14a_32874	Ppp1r14a	28.245/40.954	5.2589/65083	34.6	32544	9.8364	80.762	289.28	1911.4	1	0	0	0	TRUE
Vmn1r173_75073	Vmn1r173	14.123/3.1503	23413/4129.4	8.6364	13771	10.481	60.195	52.112	1906.4	1	0	0	0	TRUE
Fam171a1_68223	Fam171a1	51.446/51.455	47.33/82947	51.451	41497	9.6279	4.0235e-05	473.63	1904.4	1	0	0	0	TRUE
Olfr1006_65683	Olfr1006	2.0175/0	0/7450.9	1.0088	3725.4	10.857	2.0352	3.8296	1903.2	1	0	0	0	TRUE
Ccnk_2305	Ccnk	141.23/139.66	25253/1.2931e+05	140.44	77283	9.0938	1.2181	1657.5	1894.8	1	0	0	0	TRUE
Rab11b_14258	Rab11b	16.14/14.702	10.518/39005	15.421	19508	10.214	1.0347	106.4	1889.7	1	0	0	0	TRUE
Fshr_5861	Fshr	14.123/5.2505	0/29265	9.6865	14632	10.419	39.356	60.005	1887.7	1	0	0	0	TRUE
Kcns3_61162	Kcns3	62.543/70.357	96338/89.769	66.45	48214	9.4814	30.534	651.27	1886.7	1	0	0	0	TRUE
Tmem233_75017	Tmem233	179.56/116.56	15314/1.43e+05	148.06	79158	9.0527	1984.2	1770.7	1877.6	1	0	0	0	TRUE
Nfix_11569	Nfix	510.43/291.93	12227/2.8327e+05	401.18	147750	8.5211	23871	6177.4	1874.7	1	0	0	0	TRUE
Cfhr1_21915	Cfhr1	8.07/0	16944/0	4.035	8472.1	10.717	32.563	20.527	1869	1	0	0	0	TRUE
Ctsw_3750	Ctsw	3.0263/0	2608.4/6732.7	1.5131	4670.6	10.86	4.5791	6.2412	1868.9	1	0	0	0	TRUE
Vmn1r56_45064	Vmn1r56	17.149/12.601	15.777/37658	14.875	18837	10.213	10.34	101.77	1865.7	1	0	0	0	TRUE
Lin7c_18713	Lin7c	15.131/3.1503	27898/0	9.1408	13949	10.426	71.772	55.876	1864.9	1	0	0	0	TRUE
Duox2_54110	Duox2	0/1.0501	0/4937.3	0.52505	2468.7	10.661	0.55136	1.753	1864.2	1	0	0	0	TRUE
Tspan33_59376	Tspan33	0/5.2505	13005/0	2.6253	6502.6	10.809	13.784	12.164	1863.7	1	0	0	0	TRUE
Abhd2_23704	Abhd2	2.0175/7.3508	5.2589/18492	4.6841	9248.9	10.668	14.222	24.627	1862.8	1	0	0	0	TRUE
Abtb2_46668	Abtb2	0/2.1002	15.777/7450.9	1.0501	3733.3	10.831	2.2055	4.0191	1861.7	1	0	0	0	TRUE
Klra6_9399	Klra6	9.0788/1.0501	5.2589/19345	5.0644	9675.3	10.64	32.23	27.093	1857.8	1	0	0	0	TRUE
Ifih1_36934	Ifih1	11.096/6.3006	2629.4/24327	8.6985	13478	10.441	11.499	52.572	1857.7	1	0	0	0	TRUE
Zfp648_78390	Zfp648	6.0525/15.752	0/30970	10.902	15485	10.346	47.036	69.397	1857.5	1	0	0	0	TRUE
Hk2_7628	Hk2	29.254/75.608	45342/36312	52.431	40827	9.5777	1074.3	484.88	1851.7	1	0	0	0	TRUE
Bco1_26745	Bco1	58.508/71.407	3917.9/89320	64.957	46619	9.4652	83.202	633.09	1850.2	1	0	0	0	TRUE
Akr1a1_26272	Akr1a1	60.525/96.61	2492.7/1.018e+05	78.568	52146	9.3562	651.06	802.48	1838	1	0	0	0	TRUE
Trem1_26122	Trem1	7.0613/8.4009	2881.9/21904	7.7311	12393	10.471	0.89727	45.487	1836.3	1	0	0	0	TRUE
Thtpa_48121	Thtpa	271.35/113.41	75570/1.0678e+05	192.38	91175	8.8811	12473	2457.5	1835.3	1	0	0	0	TRUE
Ankub1_62288	Ankub1	11.096/8.4009	152.51/28367	9.7486	14260	10.374	3.6326	60.477	1832.4	1	0	0	0	TRUE
2010001E11Rik_37878	2010001E11Rik	7.0613/19.952	10.518/34741	13.507	17376	10.226	83.086	90.355	1826.5	1	0	0	0	TRUE
Acsm5_68814	Acsm5	49.429/47.255	12995/63422	48.342	38208	9.5969	2.363	438.3	1822.7	1	0	0	0	TRUE
Gne_22093	Gne	0/0	4712/0	0.50438	2356	10.614	0	1.671	1822.2	1	0	0	0	TRUE
Hs3st1_7979	Hs3st1	68.595/47.255	36.812/85281	57.925	42659	9.4998	227.7	548.91	1818.3	1	0	0	0	TRUE
Mcemp1_34082	Mcemp1	33.289/18.902	13216/38601	26.095	25908	9.9012	103.49	203.9	1812.5	1	0	0	0	TRUE
Ndufv2_38972	Ndufv2	3.0263/3.1503	0/13914	3.0883	6957.1	10.733	0.0076967	14.82	1806.4	1	0	0	0	TRUE
Pycrl_27717	Pycrl	53.464/68.257	28030/59338	60.86	43684	9.4639	109.42	583.75	1805.5	1	0	0	0	TRUE
control_78688	control	83.726/70.357	147.25/1.009e+05	77.042	50524	9.3385	89.367	783.09	1802.7	1	0	0	0	TRUE
Amotl1_42087	Amotl1	4.035/0	10.518/10683	2.0175	5346.5	10.791	8.1406	8.8382	1797.7	1	0	0	0	TRUE
Olfr435_65968	Olfr435	52.455/30.453	20394/47892	41.454	34143	9.6515	242.04	362.07	1792.2	1	0	0	0	TRUE
1700067K01Rik_39470	1700067K01Rik	25.219/31.503	19326/34606	28.361	26966	9.8431	19.747	226.06	1791.6	1	0	0	0	TRUE
Slc40a1_23196	Slc40a1	0/0	5.2589/4623.1	0.50438	2314.2	10.588	0	1.671	1789.8	1	0	0	0	TRUE
Suv39h2_27078	Suv39h2	2.0175/0	0/7002	1.0088	3501	10.768	2.0352	3.8296	1788.5	1	0	0	0	TRUE
Baiap2_48958	Baiap2	11.096/2.1002	0/21904	6.5982	10952	10.493	40.464	37.454	1788.5	1	0	0	0	TRUE
Gngt2_6693	Gngt2	123.07/54.606	8298.5/1.0117e+05	88.837	54734	9.251	2343.5	935.36	1786.8	1	0	0	0	TRUE
Nyap1_62690	Nyap1	84.735/130.21	4885.5/1.1832e+05	107.47	61601	9.1495	1034.1	1186.4	1785.3	1	0	0	0	TRUE
1700084C01Rik_44206	1700084C01Rik	31.271/56.706	34509/35997	43.989	35253	9.614	323.46	389.78	1783.4	1	0	0	0	TRUE
4930558K02Rik_41575	4930558K02Rik	2.0175/1.0501	0/8976.9	1.5338	4488.5	10.791	0.46793	6.3443	1781.4	1	0	0	0	TRUE
Dnmt3l_23612	Dnmt3l	4078.4/3712.1	4.1046e+05/7.6569e+05	3895.3	588070	7.2378	67070	108390	1774.4	1	0	0	0	TRUE
Fam222a_74203	Fam222a	212.85/123.91	32815/1.2927e+05	168.38	81042	8.9023	3954.6	2079.8	1773.3	1	0	0	0	TRUE
Mtmr1_22881	Mtmr1	36.315/82.959	34141/50540	59.637	42340	9.4477	1087.8	569.17	1772.2	1	0	0	0	TRUE
St8sia4_15813	St8sia4	46.403/48.305	17423/55926	47.354	36674	9.567	1.8096	427.19	1772.1	1	0	0	0	TRUE
1700012A03Rik_42659	1700012A03Rik	51.446/44.105	73.624/73521	47.775	36797	9.5593	26.951	431.92	1768.3	1	0	0	0	TRUE
Cwc25_30872	Cwc25	3.0263/0	8829.7/0	1.5131	4414.8	10.779	4.5791	6.2412	1766.6	1	0	0	0	TRUE
Cd207_63707	Cd207	89.779/58.806	37312/59427	74.292	48370	9.3274	479.66	748.41	1765.4	1	0	0	0	TRUE
Msto1_58017	Msto1	6.0525/1.0501	0/14767	3.5513	7383.5	10.664	12.512	17.568	1760.7	1	0	0	0	TRUE
Olfr1311_64616	Olfr1311	87.761/31.503	73262/10593	59.632	41927	9.4336	1582.5	569.12	1755	1	0	0	0	TRUE
Jmjd1c_49166	Jmjd1c	240.08/121.81	1.4176e+05/25988	180.95	83873	8.8486	6993.9	2276	1754.3	1	0	0	0	TRUE
Sgce_15659	Sgce	0/5.2505	15.777/12209	2.6253	6112.2	10.72	13.784	12.164	1751.7	1	0	0	0	TRUE
Gja6_73818	Gja6	118.02/17.852	41361/49328	67.938	45345	9.3615	5017.2	669.48	1749.9	1	0	0	0	TRUE
Gm14496_77031	Gm14496	1.0088/1.0501	78.883/6822.5	1.0294	3450.7	10.732	0.00085518	3.9242	1741.4	1	0	0	0	TRUE
Exosc9_22171	Exosc9	8.07/6.3006	0/22353	7.1853	11176	10.415	1.5653	41.58	1732.1	1	0	0	0	TRUE
Csnk2b_3637	Csnk2b	4.035/4.2004	0/15844	4.1177	7922.1	10.596	0.013683	21.042	1726.1	1	0	0	0	TRUE
Grem2_19585	Grem2	27.236/16.802	11527/32766	22.019	22147	9.9101	54.44	165.23	1721.2	1	0	0	0	TRUE
Slc5a1_16072	Slc5a1	11.096/34.654	5.2589/45334	22.875	22669	9.8911	277.47	173.22	1720.7	1	0	0	0	TRUE
Cd244_11726	Cd244	56.49/43.054	36.812/72982	49.772	36510	9.4901	90.258	454.49	1710.2	1	0	0	0	TRUE
Btbd17_37817	Btbd17	18.158/10.501	14846/18896	14.329	16871	10.104	29.311	97.188	1709.9	1	0	0	0	TRUE
Tbc1d8b_63500	Tbc1d8b	62.543/37.804	17102/55881	50.173	36492	9.478	306	459.05	1700.9	1	0	0	0	TRUE
Cst9_3681	Cst9	42.368/25.203	5721.7/51348	33.785	28535	9.6801	147.32	280.86	1700.7	1	0	0	0	TRUE
Ext1_5249	Ext1	36.315/10.501	21840/23609	23.408	22725	9.8628	333.18	178.23	1700.4	1	0	0	0	TRUE
Igfl3_59476	Igfl3	27.236/65.107	49891/19345	46.171	34618	9.5194	717.08	413.97	1699.2	1	0	0	0	TRUE
Capn11_68113	Capn11	141.23/27.303	15.777/1.0059e+05	84.264	50301	9.2045	6489.2	875.68	1697	1	0	0	0	TRUE
Entpd5_2426	Entpd5	51.446/43.054	44722/24776	47.25	34749	9.4923	35.212	426.03	1681.2	1	0	0	0	TRUE
Cep120_56636	Cep120	5.0438/3.1503	73.624/15306	4.097	7689.6	10.559	1.7925	20.913	1680.6	1	0	0	0	TRUE
Krt42_32567	Krt42	0/2.1002	6736.6/0	1.0501	3368.3	10.683	2.2055	4.0191	1679.6	1	0	0	0	TRUE
Olfr895_66773	Olfr895	23.201/23.102	0/44570	23.152	22285	9.8498	0.0048912	175.82	1678.9	1	0	0	0	TRUE
Tgfb1_17517	Tgfb1	6.0525/0	12774/0	3.0263	6386.9	10.632	18.316	14.458	1678.9	1	0	0	0	TRUE
Foxd4_5700	Foxd4	2.0175/0	6568.3/0	1.0088	3284.2	10.675	2.0352	3.8296	1677.7	1	0	0	0	TRUE
Olfr109_66650	Olfr109	14.123/12.601	10.518/31689	13.362	15850	10.108	1.1571	89.162	1677.1	1	0	0	0	TRUE
Fbxw17_49327	Fbxw17	7.0613/2.1002	0/16428	4.5807	8213.9	10.524	12.306	23.965	1676.9	1	0	0	0	TRUE
Serinc3_20639	Serinc3	63.551/48.305	89.401/76708	55.928	38399	9.3977	116.23	525.45	1672.7	1	0	0	0	TRUE
Hspb2_34159	Hspb2	47.411/17.852	28130/26751	32.632	27441	9.6723	436.88	269.01	1671.1	1	0	0	0	TRUE
Ap1g2_797	Ap1g2	117.02/124.96	152.51/1.2379e+05	120.99	61972	8.9887	31.583	1375.6	1667.6	1	0	0	0	TRUE
Vmn1r198_51518	Vmn1r198	18.158/12.601	0/34112	15.379	17056	10.024	15.436	106.05	1654.8	1	0	0	0	TRUE
Tmem45b_60395	Tmem45b	8.07/18.902	21.036/31374	13.486	15698	10.082	58.665	90.184	1651.6	1	0	0	0	TRUE
control_79120	control	254.21/301.38	78731/1.2783e+05	277.79	103280	8.5332	1112.8	3894.6	1650.5	1	0	0	0	TRUE
Vstm2b_26065	Vstm2b	33.289/2.1002	9786.8/27290	17.695	18538	9.9538	486.36	126.1	1649.3	1	0	0	0	TRUE
Tagln2_17078	Tagln2	32.28/44.105	5.2589/59472	38.192	29739	9.5676	69.909	327.03	1642.4	1	0	0	0	TRUE
Smarca1_45809	Smarca1	6.0525/8.4009	3870.5/17325	7.2267	10598	10.331	2.7574	41.873	1636.7	1	0	0	0	TRUE
2810417H13Rik_32142	2810417H13Rik	20.175/10.501	15.777/33663	15.338	16840	10.009	46.793	105.7	1636.5	1	0	0	0	TRUE
Olfr424_66221	Olfr424	161.4/46.205	34509/75990	103.8	55249	9.0422	6635	1136	1636.1	1	0	0	0	TRUE
Tex19.1_39634	Tex19.1	256.22/193.22	57017/1.22e+05	224.72	89507	8.6313	1984.7	2985.5	1634	1	0	0	0	TRUE
C2cd4b_42051	C2cd4b	24.21/45.155	1609.2/54086	34.682	27848	9.6082	219.34	290.14	1632.8	1	0	0	0	TRUE
Tnfrsf26_63062	Tnfrsf26	2.0175/0	0/6373.6	1.0088	3186.8	10.632	2.0352	3.8296	1627.9	1	0	0	0	TRUE
Actl10_35659	Actl10	29.254/103.96	83117/179.54	66.607	41648	9.2669	2790.6	653.19	1627	1	0	0	0	TRUE
Prl2c5_48765	Prl2c5	62.543/21.002	39620/22577	41.772	31099	9.506	862.8	365.53	1624.4	1	0	0	0	TRUE
Tmem72_69660	Tmem72	3.0263/1.0501	9671.1/0	2.0382	4835.5	10.637	1.9526	8.9481	1615.8	1	0	0	0	TRUE
Bzrap1_52269	Bzrap1	0/3.1503	15.777/8258.8	1.5752	4137.3	10.65	4.9623	6.5515	1615.8	1	0	0	0	TRUE
Prg4_46263	Prg4	12.105/7.3508	10.518/25091	9.7279	12551	10.192	11.301	60.32	1614.7	1	0	0	0	TRUE
Slc6a19_40584	Slc6a19	180.57/18.902	21.036/1.0633e+05	99.734	53176	9.0441	13068	1080.7	1614.6	1	0	0	0	TRUE
Gpr26_59972	Gpr26	10.088/13.651	247.17/28098	11.869	14172	10.105	6.3507	77.055	1613.2	1	0	0	0	TRUE
Fgfr2_5582	Fgfr2	10.088/0	5.2589/16697	5.0438	8351.2	10.432	50.879	26.958	1607.5	1	0	0	0	TRUE
Echs1_45800	Echs1	48.42/27.303	57669/0	37.861	28834	9.5353	222.97	323.51	1601	1	0	0	0	TRUE
4930505A04Rik_41376	4930505A04Rik	35.306/94.51	27436/53188	64.908	40312	9.2566	1752.5	632.49	1600.3	1	0	0	0	TRUE
Krt71_25269	Krt71	10.088/9.451	1819.6/23116	9.7692	12468	10.177	0.20259	60.635	1599.9	1	0	0	0	TRUE
Fermt2_55724	Fermt2	11.096/4.2004	6862.8/14588	7.6483	10725	10.276	23.776	44.89	1599.6	1	0	0	0	TRUE
Zfp574_59536	Zfp574	10.088/17.852	15.777/31060	13.97	15538	10.02	30.142	94.189	1599.6	1	0	0	0	TRUE
Tenm2_19734	Tenm2	15.131/65.107	50948/8752.5	40.119	29850	9.5038	1248.8	347.64	1598.8	1	0	0	0	TRUE
Tsn_18161	Tsn	45.394/39.904	84.142/61896	42.649	30990	9.4717	15.068	375.08	1597.9	1	0	0	0	TRUE
Cenpb_2745	Cenpb	56.49/64.057	38416/38376	60.273	38396	9.2915	28.626	576.75	1596.3	1	0	0	0	TRUE
Lmo1_49518	Lmo1	436.79/363.34	85615/1.6558e+05	400.06	125600	8.2908	2697.6	6155.8	1595.7	1	0	0	0	TRUE
Bud13_54263	Bud13	7.0613/5.2505	147.25/18582	6.1559	9364.7	10.354	1.6394	34.401	1595.6	1	0	0	0	TRUE
Mst1r_14834	Mst1r	442.84/176.42	1.9641e+05/17236	309.63	106820	8.4258	35491	4462.5	1594.5	1	0	0	0	TRUE
C2_1814	C2	3.0263/1.0501	2266.6/7271.3	2.0382	4768.9	10.617	1.9526	8.9481	1593.6	1	0	0	0	TRUE
Sox6_16392	Sox6	46.403/37.804	2629.4/58664	42.103	30647	9.4738	36.969	369.13	1592.9	1	0	0	0	TRUE
Plekhb2_57178	Plekhb2	96.84/85.059	9271.4/89769	90.949	49520	9.073	69.401	963.2	1592.7	1	0	0	0	TRUE
Sval2_45528	Sval2	6.0525/1.0501	5011.7/8303.7	3.5513	6657.7	10.515	12.512	17.568	1587.6	1	0	0	0	TRUE
Vmn2r115_76315	Vmn2r115	12.105/6.3006	0/23834	9.2028	11917	10.19	16.845	56.343	1586.4	1	0	0	0	TRUE
Ccl2_15383	Ccl2	164.43/77.708	23954/93405	121.07	58680	8.9091	3760	1376.7	1578.2	1	0	0	0	TRUE
Camta1_46793	Camta1	80.7/31.503	38180/34292	56.102	36236	9.3097	1210.2	527.48	1575.3	1	0	0	0	TRUE
Ubr1_18410	Ubr1	4.035/3.1503	0/13286	3.5927	6642.9	10.498	0.39133	17.817	1572.9	1	0	0	0	TRUE
Commd6_27741	Commd6	6.0525/5.2505	5.2589/17460	5.6515	8732.7	10.359	0.32158	30.983	1567.9	1	0	0	0	TRUE
Zfp101_19074	Zfp101	52.455/56.706	6710.3/64185	54.58	35448	9.3169	9.0345	509.74	1567.6	1	0	0	0	TRUE
Ifna11_8302	Ifna11	87.761/82.959	12953/80703	85.36	46828	9.0828	11.534	889.91	1566.9	1	0	0	0	TRUE
Olfr1157_66704	Olfr1157	55.481/19.952	1498.8/54759	37.717	28129	9.5049	631.16	321.98	1565.5	1	0	0	0	TRUE
Apol7e_76633	Apol7e	418.63/322.38	48303/1.8632e+05	370.51	117310	8.3027	4631.9	5590.2	1564	1	0	0	0	TRUE
Amer1_38376	Amer1	3.0263/1.0501	0/9336	2.0382	4668	10.586	1.9526	8.9481	1559.8	1	0	0	0	TRUE
Arvcf_1125	Arvcf	4.035/1.0501	0/10638	2.5426	5318.8	10.552	4.4548	11.7	1554.2	1	0	0	0	TRUE
Kcnb1_9023	Kcnb1	0/4.2004	0/9470.7	2.1002	4735.3	10.577	8.8218	9.2791	1553.8	1	0	0	0	TRUE
Klk1b27_9353	Klk1b27	16.14/27.303	36.812/39588	21.721	19813	9.7682	62.304	162.48	1552.6	1	0	0	0	TRUE
Lgr4_48611	Lgr4	11.096/32.553	10.518/39588	21.825	19799	9.7607	230.2	163.43	1547	1	0	0	0	TRUE
Trpm2_21404	Trpm2	80.7/101.86	46510/49732	91.28	48121	9.0265	223.88	967.58	1544.1	1	0	0	0	TRUE
Reps1_14639	Reps1	9.0788/2.1002	2634.7/14408	5.5895	8521.3	10.337	24.35	30.567	1540.3	1	0	0	0	TRUE
Col3a1_3188	Col3a1	11.096/27.303	11817/24597	19.2	18207	9.816	131.33	139.48	1540	1	0	0	0	TRUE
Bend4_76688	Bend4	22.193/22.052	39610/134.65	22.122	19872	9.7473	0.0098368	166.2	1539.8	1	0	0	0	TRUE
Celf5_69536	Celf5	174.51/111.31	31.553/1.2666e+05	142.91	63348	8.782	1997.3	1694	1535.6	1	0	0	0	TRUE
Reep1_22469	Reep1	0/0	3970.5/0	0.50438	1985.2	10.367	0	1.671	1535.4	1	0	0	0	TRUE
Xrn1_20008	Xrn1	2061.9/1938.5	54077/6.133e+05	2000.2	333690	7.3815	7612.4	46710	1534.7	1	0	0	0	TRUE
Vmn1r3_78217	Vmn1r3	6.0525/4.2004	0/16069	5.1265	8034.4	10.357	1.7151	27.499	1531.1	1	0	0	0	TRUE
Igfbp3_8402	Igfbp3	47.411/10.501	32474/14139	28.956	23306	9.6037	681.18	231.96	1528.4	1	0	0	0	TRUE
Cmss1_28523	Cmss1	68.595/49.355	40346/32182	58.975	36264	9.24	185.09	561.32	1528.1	1	0	0	0	TRUE
Jakmip1_42389	Jakmip1	2.0175/1.0501	21.036/7675.3	1.5338	3848.2	10.569	0.46793	6.3443	1527.2	1	0	0	0	TRUE
Nudt16l1_29459	Nudt16l1	3.0263/0	0/7630.4	1.5131	3815.2	10.568	4.5791	6.2412	1526.5	1	0	0	0	TRUE
Ephx2_5041	Ephx2	14.123/18.902	168.28/32676	16.512	16422	9.8732	11.421	115.77	1524.7	1	0	0	0	TRUE
Mbtd1_47544	Mbtd1	19.166/10.501	15.777/30701	14.834	15358	9.9219	37.543	101.43	1523.5	1	0	0	0	TRUE
Lox_9942	Lox	22.193/18.902	33604/3949.8	20.547	18777	9.7673	5.414	151.68	1522.9	1	0	0	0	TRUE
Cited1_2906	Cited1	17.149/30.453	0/40845	23.801	20423	9.6856	88.503	181.94	1512.3	1	0	0	0	TRUE
Smn1_16161	Smn1	11.096/2.1002	63.107/18448	6.5982	9255.4	10.251	40.464	37.454	1511.2	1	0	0	0	TRUE
Scp2_15348	Scp2	23.201/31.503	5.2589/44481	27.352	22243	9.6157	34.461	216.14	1511.1	1	0	0	0	TRUE
Man2c1_39754	Man2c1	21.184/5.2505	52.589/28232	13.217	14143	9.9583	126.93	87.973	1506.4	1	0	0	0	TRUE
Ceacam12_30489	Ceacam12	52.455/40.954	47.33/61582	46.705	30815	9.3353	66.135	419.92	1501.5	1	0	0	0	TRUE
Myh10_43660	Myh10	171.49/138.61	25017/1.0534e+05	155.05	65180	8.7063	540.33	1875.9	1501.3	1	0	0	0	TRUE
Pcdhgb1_45668	Pcdhgb1	250.17/54.606	80408/48296	152.39	64352	8.7127	19123	1835.7	1498.4	1	0	0	0	TRUE
Txndc2_53727	Txndc2	245.13/222.62	53199/1.1477e+05	233.87	83984	8.4821	253.21	3138.7	1494.9	1	0	0	0	TRUE
Neurod2_11506	Neurod2	48.42/30.453	26.294/55118	39.437	27572	9.4134	161.41	340.31	1492.5	1	0	0	0	TRUE
Hist1h1c_21926	Hist1h1c	1.0088/13.651	5.2589/19480	7.3301	9742.6	10.192	79.918	42.609	1491.4	1	0	0	0	TRUE
Tro_24223	Tro	18.158/25.203	10.518/37972	21.68	18991	9.7098	24.816	162.09	1490	1	0	0	0	TRUE
Wdr13_39455	Wdr13	414.6/361.24	305.02/2.2959e+05	387.92	114950	8.2073	1423.6	5922	1488.6	1	0	0	0	TRUE
Cyp2c68_74019	Cyp2c68	9.0788/22.052	4738.3/26168	15.566	15453	9.8656	84.156	107.64	1488	1	0	0	0	TRUE
Slc32a1_18726	Slc32a1	166.44/103.96	47293/71187	135.2	59240	8.7647	1952.1	1580.5	1486.7	1	0	0	0	TRUE
Dlgap4_57793	Dlgap4	35.306/52.505	10.518/58440	43.906	29225	9.3461	147.9	388.87	1479.8	1	0	0	0	TRUE
Wrap53_54898	Wrap53	0/5.2505	0/10323	2.6253	5161.7	10.476	13.784	12.164	1479.2	1	0	0	0	TRUE
Ccdc102a_60147	Ccdc102a	6.0525/7.3508	5.2589/18223	6.7016	9114.2	10.209	0.84272	38.174	1474.1	1	0	0	0	TRUE
Srebf1_16663	Srebf1	18.158/15.752	26.294/32227	16.955	16127	9.811	2.8942	119.62	1473	1	0	0	0	TRUE
Atp8b2_23803	Atp8b2	164.43/55.656	7351.9/95694	110.04	51523	8.858	5915.5	1221.9	1470.8	1	0	0	0	TRUE
Olfr536_65501	Olfr536	47.411/43.054	21.036/59023	45.233	29522	9.3187	9.4912	403.53	1467.4	1	0	0	0	TRUE
Tmem211_71466	Tmem211	8.07/11.551	21.036/22891	9.8106	11456	10.05	6.0593	60.951	1466.1	1	0	0	0	TRUE
Fbxo34_44598	Fbxo34	9.0788/46.205	28719/14722	27.642	21720	9.5668	689.17	218.98	1465.9	1	0	0	0	TRUE
Proc_13742	Proc	2.0175/0	26.294/5700.4	1.0088	2863.3	10.478	2.0352	3.8296	1462.6	1	0	0	0	TRUE
Cenpe_58172	Cenpe	14.123/1.0501	21.036/19480	7.5863	9750.5	10.149	85.444	44.444	1461.4	1	0	0	0	TRUE
39508_37266	2008-03-01	318.77/261.48	52331/1.3501e+05	290.12	93672	8.3299	1641	4112.6	1456.1	1	0	0	0	TRUE
Cdh1_2576	Cdh1	1.0088/26.253	24570/3276.6	13.631	13923	9.8944	318.63	91.379	1455.1	1	0	0	0	TRUE
Olfr481_66955	Olfr481	9.0788/6.3006	10.518/19525	7.6897	9767.7	10.135	3.859	45.188	1451.9	1	0	0	0	TRUE
Zfp54_19209	Zfp54	108.95/35.704	99.919/78144	72.324	39122	9.0595	2682.2	723.78	1451.5	1	0	0	0	TRUE
Il20_26040	Il20	3.0263/0	0/7226.4	1.5131	3613.2	10.49	4.5791	6.2412	1445.7	1	0	0	0	TRUE
Fam78b_57080	Fam78b	41.359/38.854	47.33/53906	40.106	26977	9.3582	3.137	347.51	1445	1	0	0	0	TRUE
AI413582_48369	AI413582	5.0438/4.2004	5.2589/14228	4.6221	7116.8	10.306	0.3556	24.23	1444.9	1	0	0	0	TRUE
Btla_52384	Btla	15.131/21.002	10.518/32856	18.067	16433	9.7514	17.234	129.38	1443.1	1	0	0	0	TRUE
Dclk3_63315	Dclk3	129.12/107.11	31564/74105	118.12	52834	8.793	242.2	1334.9	1442.8	1	0	0	0	TRUE
Mpeg1_10871	Mpeg1	15.131/2.1002	20741/0	8.6157	10371	10.075	84.904	51.959	1437.5	1	0	0	0	TRUE
Ngfrap1_1549	Ngfrap1	60.525/111.31	37648/48565	85.918	43107	8.9541	1289.6	897.18	1436.3	1	0	0	0	TRUE
Kif20a_14330	Kif20a	15.131/21.002	10.518/32676	18.067	16343	9.7435	17.234	129.38	1435.2	1	0	0	0	TRUE
Aida_49217	Aida	36.315/76.658	11175/55118	56.486	33147	9.1715	813.77	531.99	1434.7	1	0	0	0	TRUE
Prkd2_47147	Prkd2	3.0263/16.802	0/22532	9.914	11266	10.012	94.882	61.742	1432.5	1	0	0	0	TRUE
Shroom3_21177	Shroom3	41.359/55.656	6983.8/53188	48.507	30086	9.2473	102.2	440.17	1431.7	1	0	0	0	TRUE
Cttnbp2_21633	Cttnbp2	11.096/7.3508	13373/8079.2	9.2235	10726	10.035	7.0144	56.498	1425.8	1	0	0	0	TRUE
BC051665_55552	BC051665	82.718/22.052	6337/56420	52.385	31378	9.1992	1840.1	484.35	1423.4	1	0	0	0	TRUE
Zfp345_74905	Zfp345	3.0263/1.0501	31.553/8483.2	2.0382	4257.4	10.453	1.9526	8.9481	1422.6	1	0	0	0	TRUE
Foxp4_40142	Foxp4	19.166/12.601	10.518/29893	15.884	14952	9.7906	21.549	110.36	1421.8	1	0	0	0	TRUE
Cd164l2_34762	Cd164l2	58.508/71.407	3760.1/67910	64.957	35835	9.0857	83.202	633.09	1421.6	1	0	0	0	TRUE
Slc31a1_16040	Slc31a1	11.096/10.501	0/23475	10.799	11737	9.9584	0.17712	68.588	1415.9	1	0	0	0	TRUE
Olfr774_64517	Olfr774	252.19/100.81	29834/1.0337e+05	176.5	66602	8.5516	11458	2206.1	1414.2	1	0	0	0	TRUE
Golga7_25785	Golga7	107.94/49.355	46021/34292	78.646	40156	8.9778	1715.9	803.47	1413.9	1	0	0	0	TRUE
Edn2_4663	Edn2	24.21/22.052	5.2589/37479	23.131	18742	9.6012	2.328	175.62	1412.5	1	0	0	0	TRUE
Sycp1_16965	Sycp1	9.0788/6.3006	31.553/18941	7.6897	9486.4	10.092	3.859	45.188	1410.1	1	0	0	0	TRUE
Serpina3k_16488	Serpina3k	90.788/48.305	31517/42640	69.546	37078	9.0378	902.39	689.29	1409.6	1	0	0	0	TRUE
Apba2_858	Apba2	29.254/40.954	42.071/48341	35.104	24191	9.3882	68.45	294.53	1407.6	1	0	0	0	TRUE
Clu_3002	Clu	80.7/48.305	32326/38287	64.503	35306	9.0742	524.72	627.58	1406.8	1	0	0	0	TRUE
1700016C15Rik_34417	1700016C15Rik	23.201/16.802	31.553/34067	20.002	17050	9.6651	20.477	146.72	1405.9	1	0	0	0	TRUE
LOC100862015_78593	LOC100862015	47.411/1.0501	21.036/38376	24.231	19199	9.5717	1074.7	186.02	1405.9	1	0	0	0	TRUE
Tulp1_18269	Tulp1	13.114/22.052	6762.9/24687	17.583	15725	9.7249	39.948	125.11	1404.2	1	0	0	0	TRUE
Prrc1_39166	Prrc1	7.0613/40.954	5.2589/37972	24.008	18989	9.5686	574.37	183.9	1398.5	1	0	0	0	TRUE
Dnajc15_27586	Dnajc15	13.114/71.407	53856/0	42.261	26928	9.2819	1699.1	370.84	1396.1	1	0	0	0	TRUE
Tmub2_37896	Tmub2	1.0088/25.203	0/26078	13.106	13039	9.8525	292.67	87.059	1396	1	0	0	0	TRUE
Cd163l1_63054	Cd163l1	5.0438/6.3006	0/15575	5.6722	7787.5	10.189	0.78989	31.122	1394.9	1	0	0	0	TRUE
Map2k6_20174	Map2k6	12.105/3.1503	0/18672	7.6277	9336	10.08	40.093	44.742	1394.6	1	0	0	0	TRUE
Olfr1472_66112	Olfr1472	5.0438/8.4009	47.33/17191	6.7223	8619.1	10.124	5.6351	38.319	1391.3	1	0	0	0	TRUE
Zfp72_61313	Zfp72	58.508/94.51	10.518/77516	76.509	38763	8.9662	648.08	776.34	1388.5	1	0	0	0	TRUE
Vmn2r71_59759	Vmn2r71	119.03/54.606	7294.1/76573	86.819	41934	8.8994	2075.4	908.93	1388	1	0	0	0	TRUE
Pygl_49719	Pygl	15.131/6.3006	10.518/22891	10.716	11451	9.9329	38.99	67.942	1387.9	1	0	0	0	TRUE
Tulp4_33513	Tulp4	9.0788/4.2004	5.2589/17056	6.6396	8530.7	10.125	11.899	37.742	1387.5	1	0	0	0	TRUE
Olfr857_64133	Olfr857	64.56/126.01	157.77/88513	95.287	44335	8.8469	1888.2	1020.9	1384.6	1	0	0	0	TRUE
Adgrg5_72766	Adgrg5	1.0088/0	3570.8/0	0.50438	1785.4	10.214	0.50879	1.671	1380.8	1	0	0	0	TRUE
Laptm4a_11062	Laptm4a	1.0088/10.501	15.777/15530	5.7549	7772.9	10.168	45.052	31.678	1380	1	0	0	0	TRUE
Ptchd3_41077	Ptchd3	26.228/14.702	1509.3/32407	20.465	16958	9.6259	66.425	150.93	1378.7	1	0	0	0	TRUE
Reep4_38610	Reep4	34.298/12.601	13436/23430	23.449	18433	9.5584	235.36	178.62	1377.5	1	0	0	0	TRUE
Insl6_20948	Insl6	20.175/1.0501	10.518/22577	10.613	11294	9.9257	182.88	67.136	1377.1	1	0	0	0	TRUE
Nts_30664	Nts	103.9/145.96	84.142/1.0422e+05	124.93	52153	8.694	884.67	1431.9	1374.9	1	0	0	0	TRUE
Bhlhe40_16851	Bhlhe40	2.0175/7.3508	5.2589/13645	4.6841	6825.1	10.23	14.222	24.627	1374.4	1	0	0	0	TRUE
Kbtbd13_40873	Kbtbd13	22.193/10.501	21724/7675.3	16.347	14700	9.727	68.345	114.34	1373.2	1	0	0	0	TRUE
Nudcd2_22650	Nudcd2	2.0175/2.1002	0/8258.8	2.0589	4129.4	10.399	0.0034207	9.0582	1371.4	1	0	0	0	TRUE
Pitpna_13038	Pitpna	0/0	0/3545.9	0.50438	1772.9	10.204	0	1.671	1371.1	1	0	0	0	TRUE
Flad1_69761	Flad1	42.368/79.808	36.812/66340	61.088	33188	9.0622	700.9	586.47	1367.9	1	0	0	0	TRUE
Vmn2r60_76307	Vmn2r60	17.149/17.852	10.518/30522	17.5	15266	9.6887	0.24715	124.39	1367.2	1	0	0	0	TRUE
Prdx6b_70321	Prdx6b	22.193/23.102	15.777/35773	22.647	17894	9.5637	0.41391	171.09	1366.3	1	0	0	0	TRUE
Prl8a8_40310	Prl8a8	105.92/26.253	25053/44570	66.086	34812	9.0194	3173.4	646.82	1366.2	1	0	0	0	TRUE
Cldn2_2959	Cldn2	42.368/27.303	9460.7/37164	34.835	23313	9.3456	113.47	291.73	1362.9	1	0	0	0	TRUE
Gm438_71024	Gm438	15.131/12.601	0/26347	13.866	13174	9.7915	3.2004	93.33	1362.2	1	0	0	0	TRUE
Rnf138rt1_40468	Rnf138rt1	44.385/143.86	29066/57273	94.125	43169	8.826	4948.1	1005.4	1358.5	1	0	0	0	TRUE
Rpl10l_61179	Rpl10l	0/0	3512.9/0	0.50438	1756.5	10.19	0	1.671	1358.4	1	0	0	0	TRUE
Hnrnpl_7757	Hnrnpl	0/0	3502.4/0	0.50438	1751.2	10.186	0	1.671	1354.3	1	0	0	0	TRUE
9530077C05Rik_32659	9530077C05Rik	2.0175/1.0501	0/6822.5	1.5338	3411.2	10.395	0.46793	6.3443	1353.7	1	0	0	0	TRUE
Tbc1d17_59680	Tbc1d17	2.0175/1.0501	0/6822.5	1.5338	3411.2	10.395	0.46793	6.3443	1353.7	1	0	0	0	TRUE
Gm9376_76943	Gm9376	6.0525/8.4009	21.036/17460	7.2267	8740.6	10.053	2.7574	41.873	1349.6	1	0	0	0	TRUE
control_79427	control	0/0	3481.4/0	0.50438	1740.7	10.177	0	1.671	1346.2	1	0	0	0	TRUE
Was_18810	Was	116.01/80.858	2818.8/85146	98.432	43982	8.789	617.69	1063.1	1345.9	1	0	0	0	TRUE
Ufsp1_35519	Ufsp1	8.07/1.0501	5.2589/13106	4.5601	6555.8	10.204	24.64	23.833	1341.9	1	0	0	0	TRUE
Ecel1_4617	Ecel1	112.98/66.157	31.553/82633	89.568	41332	8.8341	1096.2	944.99	1341.6	1	0	0	0	TRUE
Shcbp1_15720	Shcbp1	3.0263/1.0501	15.777/7989.5	2.0382	4002.6	10.364	1.9526	8.9481	1337.4	1	0	0	0	TRUE
Chrac1_45658	Chrac1	37.324/133.36	47.33/79805	85.344	39926	8.8531	4611.8	889.7	1335.7	1	0	0	0	TRUE
Pmf1_29793	Pmf1	203.77/285.63	70201/84204	244.7	77202	8.2956	3350.7	3321.9	1335.2	1	0	0	0	TRUE
Vmn1r2_78213	Vmn1r2	13.114/4.2004	0/19211	8.6571	9605.3	9.9582	39.724	52.265	1327.4	1	0	0	0	TRUE
Zfp174_73228	Zfp174	96.84/23.102	55550/8124.1	59.971	31837	9.0284	2718.6	573.15	1327.3	1	0	0	0	TRUE
Gtsf1l_32564	Gtsf1l	1.0088/3.1503	5.2589/8034.4	2.0795	4019.8	10.351	2.2932	9.1685	1326.9	1	0	0	0	TRUE
Prr16_36763	Prr16	122.06/113.41	18701/77875	117.74	48288	8.6678	37.388	1329.6	1321.1	1	0	0	0	TRUE
Dcstamp_42163	Dcstamp	2.0175/5.2505	5.2589/11221	3.634	5613.2	10.243	5.2263	18.068	1319.7	1	0	0	0	TRUE
Olfml1_63025	Olfml1	1.0088/0	0/3411.2	0.50438	1705.6	10.148	0.50879	1.671	1319.1	1	0	0	0	TRUE
Wnt6_18912	Wnt6	0/0	3407.8/0	0.50438	1703.9	10.146	0	1.671	1317.7	1	0	0	0	TRUE
Dhx58_44871	Dhx58	0/0	3407.8/0	0.50438	1703.9	10.146	0	1.671	1317.7	1	0	0	0	TRUE
Trip13_34888	Trip13	0/0	3402.5/0	0.50438	1701.2	10.144	0	1.671	1315.7	1	0	0	0	TRUE
Kctd3_57140	Kctd3	41.359/73.508	43601/17819	57.433	30710	9.0378	516.77	543.11	1315.3	1	0	0	0	TRUE
Fgf17_5540	Fgf17	21.184/18.902	13095/18762	20.043	15928	9.5641	2.6034	147.09	1311.7	1	0	0	0	TRUE
Ces1d_47735	Ces1d	335.91/121.81	3470.9/1.4166e+05	228.86	72563	8.3023	22920	3054.7	1308.8	1	0	0	0	TRUE
Dhx30_38923	Dhx30	0/0	3381.5/0	0.50438	1690.7	10.135	0	1.671	1307.5	1	0	0	0	TRUE
Olfr1341_66714	Olfr1341	4.035/0	0/7765	2.0175	3882.5	10.33	8.1406	8.8382	1305.3	1	0	0	0	TRUE
Hpcal1_23001	Hpcal1	55.481/48.305	3870.5/53323	51.893	28597	9.0786	25.75	478.7	1304.7	1	0	0	0	TRUE
Atp5k_1275	Atp5k	0/0	3370.9/0	0.50438	1685.5	10.131	0	1.671	1303.5	1	0	0	0	TRUE
Hps6_15102	Hps6	0/4.2004	0/7944.6	2.1002	3972.3	10.324	8.8218	9.2791	1303.3	1	0	0	0	TRUE
Ccdc89_35322	Ccdc89	12.105/9.451	31.553/21545	10.778	10788	9.8393	3.522	68.427	1302.9	1	0	0	0	TRUE
Wtap_26698	Wtap	5934.5/5648.5	2.4227e+05/8.704e+05	5791.5	556330	6.5856	40885	178980	1301.3	1	0	0	0	TRUE
Me2_48453	Me2	13.114/10.501	22771/0	11.807	11385	9.7961	3.4131	76.559	1299.9	1	0	0	0	TRUE
Serpinb9d_16519	Serpinb9d	12.105/25.203	30102/89.769	18.654	15096	9.5852	85.773	134.6	1299.6	1	0	0	0	TRUE
Mtmr4_51100	Mtmr4	22.193/144.91	36.812/76618	83.554	38327	8.8243	7530.4	866.48	1299.2	1	0	0	0	TRUE
Vmn2r10_18621	Vmn2r10	8.07/10.501	5.2589/19615	9.2855	9809.9	9.8976	2.955	56.966	1298.5	1	0	0	0	TRUE
Tmem199_52081	Tmem199	8.07/1.0501	0/12657	4.5601	6328.7	10.153	24.64	23.833	1295.4	1	0	0	0	TRUE
Spag11a_43984	Spag11a	61.534/7.3508	3108/40890	34.442	21999	9.2778	1467.9	287.65	1295.1	1	0	0	0	TRUE
Krtap8-1_9575	Krtap8-1	40.35/126.01	42823/33304	83.182	38064	8.8207	3669.1	861.67	1293.9	1	0	0	0	TRUE
Adamts17_59734	Adamts17	101.88/100.81	26.294/86089	101.35	43058	8.7167	0.57623	1102.6	1293.7	1	0	0	0	TRUE
Dgcr2_4195	Dgcr2	168.46/67.207	86588/8034.4	117.83	47311	8.6371	5126.2	1331	1293.6	1	0	0	0	TRUE
Arrdc3_47983	Arrdc3	4.035/10.501	21.036/16787	7.268	8403.9	9.9895	20.905	42.168	1293.1	1	0	0	0	TRUE
Olfr1477_66136	Olfr1477	10.088/10.501	15.777/20782	10.294	10399	9.8467	0.085518	64.668	1291.8	1	0	0	0	TRUE
Gad2_6090	Gad2	52.455/36.754	51258/44.885	44.604	25652	9.1357	123.27	396.58	1285.9	1	0	0	0	TRUE
Dnah1_49710	Dnah1	16.14/9.451	15.777/23609	12.795	11813	9.742	22.372	84.527	1283.4	1	0	0	0	TRUE
Nlk_11697	Nlk	50.438/33.603	33767/15530	42.021	24649	9.1623	141.69	368.23	1282.3	1	0	0	0	TRUE
Prss54_36408	Prss54	3.0263/1.0501	0/7675.3	2.0382	3837.6	10.303	1.9526	8.9481	1282.2	1	0	0	0	TRUE
1700030F18Rik_38256	1700030F18Rik	1.0088/2.1002	0/6508.3	1.5545	3254.1	10.315	0.59565	6.4478	1280.9	1	0	0	0	TRUE
Eif1ad_35084	Eif1ad	0/0	3307.8/0	0.50438	1653.9	10.103	0	1.671	1279.1	1	0	0	0	TRUE
Eda_4635	Eda	332.89/266.73	3376.2/1.6464e+05	299.81	84007	8.1255	2188.6	4285.6	1278.7	1	0	0	0	TRUE
Neu4_62053	Neu4	9.0788/5.2505	0/16473	7.1647	8236.3	9.9786	7.3276	41.433	1278.4	1	0	0	0	TRUE
Ppp1r3c_22935	Ppp1r3c	252.19/281.43	51201/1.0458e+05	266.81	77891	8.1841	427.52	3702.4	1275.7	1	0	0	0	TRUE
Apoo_32713	Apoo	0/0	3297.3/0	0.50438	1648.7	10.099	0	1.671	1275	1	0	0	0	TRUE
Matk_10363	Matk	1.0088/13.651	0/16652	7.3301	8326.1	9.9653	79.918	42.609	1274.4	1	0	0	0	TRUE
Rit1_14764	Rit1	19.166/45.155	11291/30118	32.16	20704	9.2863	337.7	264.2	1271.8	1	0	0	0	TRUE
Hamp2_28375	Hamp2	13.114/57.756	29823/14139	35.435	21981	9.2368	996.46	297.98	1271.3	1	0	0	0	TRUE
Klhl31_63282	Klhl31	201.75/180.62	4591/1.2123e+05	191.18	62912	8.3547	223.27	2438.3	1270.2	1	0	0	0	TRUE
Ttc24_53979	Ttc24	0/0	3281.5/0	0.50438	1640.8	10.092	0	1.671	1268.9	1	0	0	0	TRUE
Robo4_40198	Robo4	8.07/23.102	21.036/26347	15.586	13184	9.6347	112.99	107.81	1268.3	1	0	0	0	TRUE
Actr10_24812	Actr10	0/4.2004	0/7720.2	2.1002	3860.1	10.282	8.8218	9.2791	1266.5	1	0	0	0	TRUE
Coro7_44490	Coro7	4.035/1.0501	0/8662.7	2.5426	4331.4	10.256	4.4548	11.7	1265.5	1	0	0	0	TRUE
Olfr967_64284	Olfr967	6.0525/19.952	0/23475	13.002	11737	9.7114	96.599	86.214	1262.7	1	0	0	0	TRUE
Atp1b4_31608	Atp1b4	0/1.0501	3344.7/0	0.52505	1672.3	10.1	0.55136	1.753	1262.7	1	0	0	0	TRUE
Tmem160_33914	Tmem160	0/1.0501	3344.7/0	0.52505	1672.3	10.1	0.55136	1.753	1262.7	1	0	0	0	TRUE
Vmn1r119_73140	Vmn1r119	0/5.2505	10.518/8797.4	2.6253	4404	10.247	13.784	12.164	1262	1	0	0	0	TRUE
Apoo_32711	Apoo	4.035/13.651	10.518/18492	8.8432	9251.5	9.8765	46.238	53.649	1261.9	1	0	0	0	TRUE
Olfr1044_67257	Olfr1044	4.035/0	0/7495.7	2.0175	3747.9	10.279	8.1406	8.8382	1260	1	0	0	0	TRUE
Cbln1_2195	Cbln1	15.131/24.152	3286.8/26931	19.642	15109	9.5157	40.691	143.46	1259.8	1	0	0	0	TRUE
Ubxn1_56757	Ubxn1	25.219/17.852	26.294/31958	21.535	15992	9.471	27.136	160.76	1259.6	1	0	0	0	TRUE
Cryz_3573	Cryz	0/0	3255.3/0	0.50438	1627.6	10.08	0	1.671	1258.7	1	0	0	0	TRUE
Zcchc10_32010	Zcchc10	10.088/6.3006	52.589/17550	8.1941	8801.2	9.903	7.1702	48.853	1258	1	0	0	0	TRUE
Id2_8225	Id2	40.35/48.305	26.294/49957	44.328	24991	9.1069	31.64	393.52	1257.6	1	0	0	0	TRUE
Hbq1a_54788	Hbq1a	16.14/23.102	52.589/30028	19.621	15040	9.5106	24.237	143.28	1254.9	1	0	0	0	TRUE
Tssk1_18173	Tssk1	13.114/3.1503	0/17460	8.132	8730.1	9.901	49.635	48.4	1253.7	1	0	0	0	TRUE
Ackr2_26586	Ackr2	4.035/0	5.2589/7450.9	2.0175	3728.1	10.271	8.1406	8.8382	1253.3	1	0	0	0	TRUE
Hey1_7514	Hey1	31.271/87.159	22650/36940	59.215	29795	8.9508	1561.7	564.17	1251.9	1	0	0	0	TRUE
Stx3_16874	Stx3	129.12/114.46	199.84/93001	121.79	46600	8.568	107.43	1387	1248	1	0	0	0	TRUE
Vmn1r20_74220	Vmn1r20	35.306/94.51	52.589/62839	64.908	31446	8.8982	1752.5	632.49	1247.8	1	0	0	0	TRUE
Haghl_33738	Haghl	4.035/6.3006	0/13151	5.1678	6575.6	10.058	2.5666	27.771	1246.8	1	0	0	0	TRUE
Dao_3996	Dao	23.201/16.802	30097/89.769	20.002	15093	9.4893	20.477	146.72	1244.4	1	0	0	0	TRUE
Rhoq_47753	Rhoq	9.0788/9.451	18753/0	9.2649	9376.6	9.8354	0.06927	56.81	1242.8	1	0	0	0	TRUE
Slc47a1_30856	Slc47a1	23.201/9.451	0/26572	16.326	13286	9.5828	94.535	114.16	1241.9	1	0	0	0	TRUE
Cxcl1_6984	Cxcl1	123.07/31.503	38506/31285	77.285	34895	8.8001	4192	786.18	1241.8	1	0	0	0	TRUE
Atp6v1e2_41282	Atp6v1e2	1.0088/4.2004	0/8617.9	2.6046	4308.9	10.224	5.0934	12.048	1240.7	1	0	0	0	TRUE
Olfr643_67491	Olfr643	30.263/85.059	18501/39364	57.661	28932	8.9461	1501.3	545.79	1236	1	0	0	0	TRUE
Slc38a3_42546	Slc38a3	61.534/37.804	3833.7/48879	49.669	26357	9.0229	281.56	453.31	1235.6	1	0	0	0	TRUE
Olfr919_65219	Olfr919	13.114/12.601	22803/0	12.858	11401	9.6844	0.13131	85.032	1235	1	0	0	0	TRUE
Scamp3_19852	Scamp3	160.39/174.32	178.8/1.1226e+05	167.35	56218	8.3834	96.973	2064	1233.7	1	0	0	0	TRUE
Olfr1204_65305	Olfr1204	232.01/165.92	59194/65801	198.96	62497	8.2879	2184.3	2563.2	1230.5	1	0	0	0	TRUE
Prodh_13747	Prodh	26.228/14.702	15.777/30252	20.465	15134	9.4617	66.425	150.93	1230.2	1	0	0	0	TRUE
Tppp3_32019	Tppp3	6.0525/8.4009	78.883/15799	7.2267	7939.1	9.9146	2.7574	41.873	1225.8	1	0	0	0	TRUE
Gpld1_6795	Gpld1	47.411/37.804	5.2589/47443	42.608	23724	9.0876	46.151	374.63	1223.5	1	0	0	0	TRUE
Vmn2r1_25071	Vmn2r1	27.236/58.806	2655.7/44885	43.021	23770	9.0768	498.32	379.16	1218.5	1	0	0	0	TRUE
Mrps18b_29629	Mrps18b	12.105/12.601	0/21949	12.353	10974	9.6829	0.12315	80.941	1218.4	1	0	0	0	TRUE
Ramp3_24143	Ramp3	4.035/3.1503	10.518/10279	3.5927	5144.6	10.13	0.39133	17.817	1217.9	1	0	0	0	TRUE
Pcdhb21_45950	Pcdhb21	12.105/2.1002	63.107/15530	7.1026	7796.6	9.9104	50.048	40.993	1216.6	1	0	0	0	TRUE
Mrgprx2_62964	Mrgprx2	0/0	3144.8/0	0.50438	1572.4	10.031	0	1.671	1216	1	0	0	0	TRUE
0610009O20Rik_29268	0610009O20Rik	6.0525/2.1002	0/11087	4.0764	5543.3	10.093	7.8103	20.784	1215	1	0	0	0	TRUE
Tfcp2_17261	Tfcp2	24.21/28.353	3470.9/31329	26.281	17400	9.317	8.5817	205.71	1211.4	1	0	0	0	TRUE
Rasa3_14458	Rasa3	9.0788/8.4009	47.33/17550	8.7398	8798.6	9.8193	0.22977	52.88	1208.8	1	0	0	0	TRUE
F11r_8945	F11r	0/6.3006	0/9425.8	3.1503	4712.9	10.149	19.849	15.183	1208.7	1	0	0	0	TRUE
Ctbp2_3690	Ctbp2	125.09/164.87	3029.1/97489	144.98	50259	8.4275	791.29	1724.7	1206.7	1	0	0	0	TRUE
B3glct_72588	B3glct	1451.6/1241.2	5237.8/4.0329e+05	1346.4	204260	7.2441	22127	28351	1205.1	1	0	0	0	TRUE
Dock1_71237	Dock1	5.0438/1.0501	0/9201.4	3.0469	4600.7	10.151	7.9746	14.579	1204.1	1	0	0	0	TRUE
Plekhh1_53345	Plekhh1	105.92/134.41	68.366/89006	120.17	44537	8.5219	405.98	1364	1202.7	1	0	0	0	TRUE
Myo1d_71611	Myo1d	29.254/6.3006	5.2589/27110	17.777	13558	9.496	263.42	126.82	1202.3	1	0	0	0	TRUE
Nobox_12087	Nobox	33.289/25.203	31.553/36850	29.246	18441	9.252	32.693	234.84	1201.5	1	0	0	0	TRUE
Rhox2b_77321	Rhox2b	15.131/23.102	15.777/28322	19.117	14169	9.4602	31.769	138.74	1201.3	1	0	0	0	TRUE
Qser1_46591	Qser1	81.709/72.457	9450.2/57946	77.083	33698	8.7535	42.794	783.62	1201	1	0	0	0	TRUE
Cntfr_3127	Cntfr	10.088/8.4009	0/18044	9.2442	9021.8	9.7826	1.4224	56.654	1197.4	1	0	0	0	TRUE
Fpr3_5837	Fpr3	0/5.2505	5.2589/8348.5	2.6253	4176.9	10.17	13.784	12.164	1196.9	1	0	0	0	TRUE
Gpr83_6424	Gpr83	15.131/68.257	3586.6/42147	41.694	22867	9.0651	1411.2	364.68	1195.2	1	0	0	0	TRUE
Fbxw20_74323	Fbxw20	83.726/58.806	47.33/63781	71.266	31914	8.7867	310.51	710.6	1194.5	1	0	0	0	TRUE
Pax2_12527	Pax2	39.341/36.754	26.294/43134	38.048	21580	9.1103	3.3476	325.49	1194	1	0	0	0	TRUE
Olfr309_64450	Olfr309	5.0438/0	5.2589/8124.1	2.5219	4064.7	10.173	12.72	11.585	1193.5	1	0	0	0	TRUE
Zic1_19301	Zic1	6.0525/9.451	26.294/16114	7.7517	8069.9	9.849	5.7748	45.636	1193.4	1	0	0	0	TRUE
Etv6_5203	Etv6	42.368/35.704	63.107/43763	39.036	21913	9.0963	22.204	336.02	1193.3	1	0	0	0	TRUE
Aim1l_58558	Aim1l	10.088/25.203	36.812/26751	17.645	13394	9.4887	114.23	125.66	1193.3	1	0	0	0	TRUE
Gng2_6663	Gng2	10.088/2.1002	5.2589/13914	6.0939	6959.8	9.9385	31.898	33.977	1192.9	1	0	0	0	TRUE
Tecta_17386	Tecta	12.105/11.551	184.06/20737	11.828	10460	9.6716	0.15336	76.724	1192.9	1	0	0	0	TRUE
Fev_67724	Fev	5.0438/0	0/8124.1	2.5219	4062.1	10.172	12.72	11.585	1192.7	1	0	0	0	TRUE
Tekt2_19944	Tekt2	2.0175/0	0/4668	1.0088	2334	10.183	2.0352	3.8296	1192.2	1	0	0	0	TRUE
Znrd1as_42708	Znrd1as	71.621/81.908	17670/48969	76.765	33320	8.7431	52.912	779.59	1190.6	1	0	0	0	TRUE
Prap1_18524	Prap1	17.149/13.651	5.2589/24552	15.4	12279	9.5483	6.1158	106.23	1189.8	1	0	0	0	TRUE
Cdh7_62067	Cdh7	0/0	3076.4/0	0.50438	1538.2	9.9988	0	1.671	1189.6	1	0	0	0	TRUE
Ccbl1_35542	Ccbl1	126.09/126.01	27041/63602	126.05	45321	8.4786	0.0032777	1448	1187.7	1	0	0	0	TRUE
Adam19_251	Adam19	129.12/40.954	19174/51572	85.037	35373	8.6835	3886.6	885.72	1185.7	1	0	0	0	TRUE
Defb9_63611	Defb9	85.744/49.355	52.589/61043	67.549	30548	8.7998	662.07	664.72	1182.2	1	0	0	0	TRUE
Obscn_71938	Obscn	32.28/65.107	21.036/49732	48.693	24877	8.9676	538.79	442.27	1180.6	1	0	0	0	TRUE
Zfp560_74293	Zfp560	40.35/24.152	38390/44.885	32.251	19217	9.1749	131.18	265.12	1178.3	1	0	0	0	TRUE
Olfr293_64018	Olfr293	42.368/107.11	20494/44167	74.739	32330	8.7377	2095.9	754.02	1174.7	1	0	0	0	TRUE
Ccnt2_39018	Ccnt2	43.376/56.706	5180/44974	50.041	25077	8.9406	88.838	457.54	1170	1	0	0	0	TRUE
Trmt2a_8109	Trmt2a	32.28/76.658	63.107/52784	54.469	26424	8.896	984.7	508.45	1169.4	1	0	0	0	TRUE
Olfr1270_67159	Olfr1270	8.07/6.3006	0/15081	7.1853	7540.6	9.8476	1.5653	41.58	1168.3	1	0	0	0	TRUE
Odf3l1_72806	Odf3l1	50.438/22.052	63.107/40890	36.245	20477	9.1028	402.86	306.45	1167.6	1	0	0	0	TRUE
Snx9_28786	Snx9	54.473/34.654	19053/27469	44.563	23261	8.9959	196.4	396.12	1166.5	1	0	0	0	TRUE
Chst11_26210	Chst11	97.849/103.96	21.036/77426	100.9	38724	8.5699	18.677	1096.6	1166.3	1	0	0	0	TRUE
Gabarapl1_25781	Gabarapl1	81.709/37.804	131.47/55612	59.756	27872	8.8416	963.82	570.6	1164.3	1	0	0	0	TRUE
Hmgcs2_7675	Hmgcs2	20.175/5.2505	15.777/21320	12.713	10668	9.6037	111.37	83.854	1163.6	1	0	0	0	TRUE
Ifitm5_39821	Ifitm5	58.508/45.155	50811/89.769	51.831	25451	8.9122	89.15	477.99	1161.7	1	0	0	0	TRUE
4930564D02Rik_41488	4930564D02Rik	54.473/19.952	25148/16248	37.212	20698	9.0813	595.83	316.64	1161.1	1	0	0	0	TRUE
Mrpl3_46010	Mrpl3	0/0	3002.8/0	0.50438	1501.4	9.9639	0	1.671	1161.1	1	0	0	0	TRUE
Stoml1_33929	Stoml1	8.07/7.3508	47.33/15575	7.7104	7811.2	9.8088	0.25866	45.338	1158.9	1	0	0	0	TRUE
Zrsr1_18322	Zrsr1	127.1/92.409	42.071/80972	109.76	40507	8.5147	601.81	1218	1157.5	1	0	0	0	TRUE
Tmprss11e_62649	Tmprss11e	9.0788/7.3508	10.518/16203	8.2148	8106.9	9.7812	1.493	49.005	1156.9	1	0	0	0	TRUE
Prps1l1_41677	Prps1l1	12.105/3.1503	0/15485	7.6277	7742.6	9.8098	40.093	44.742	1156.4	1	0	0	0	TRUE
Cdyl2_42215	Cdyl2	55.481/142.81	36.812/75900	99.148	37968	8.5666	3813.6	1072.8	1156.2	1	0	0	0	TRUE
Pnliprp1_13348	Pnliprp1	7.0613/2.1002	3418.3/7899.7	4.5807	5659	9.9861	12.306	23.965	1155	1	0	0	0	TRUE
Gpr12_6765	Gpr12	6.0525/8.4009	15.777/14947	7.2267	7481.2	9.8289	2.7574	41.873	1155	1	0	0	0	TRUE
Xlr5b_75904	Xlr5b	13.114/2.1002	31.553/15395	7.607	7713.5	9.8078	60.649	44.593	1154	1	0	0	0	TRUE
Tbx3_17155	Tbx3	51.446/35.704	52.589/45199	43.575	22626	8.9876	123.92	385.23	1150.5	1	0	0	0	TRUE
Gm7694_76541	Gm7694	32.28/53.556	21.036/44795	42.918	22408	8.9951	226.32	378.02	1150.3	1	0	0	0	TRUE
Gm13287_74987	Gm13287	21.184/15.752	10.518/26527	18.468	13269	9.4128	14.754	132.94	1149.2	1	0	0	0	TRUE
Lrrc27_42940	Lrrc27	101.88/35.704	18974/40980	68.794	29977	8.7466	2189.9	680.01	1146.9	1	0	0	0	TRUE
Hif3a_22957	Hif3a	10.088/9.451	10.518/17864	9.7692	8937.3	9.6969	0.20259	60.635	1146.5	1	0	0	0	TRUE
Cdc14b_55556	Cdc14b	20.175/1.0501	0/18807	10.613	9403.3	9.6615	182.88	67.136	1146.3	1	0	0	0	TRUE
Ttc23_29722	Ttc23	92.805/90.309	7404.5/64185	91.557	35795	8.5952	3.1146	971.24	1145.6	1	0	0	0	TRUE
Cidec_5863	Cidec	60.525/145.96	47.33/76977	103.25	38512	8.5292	3650	1128.4	1143.4	1	0	0	0	TRUE
Bbc3_51164	Bbc3	362.14/174.32	89364/50765	268.23	70064	8.0237	17639	3727.2	1143.2	1	0	0	0	TRUE
Slc9a5_68994	Slc9a5	14.123/4.2004	7877.8/9246.2	9.1615	8562	9.7189	49.224	56.031	1142.6	1	0	0	0	TRUE
Nkiras2_37699	Nkiras2	73.639/111.31	9182/62659	92.475	35920	8.586	709.61	983.41	1142.5	1	0	0	0	TRUE
Kdm5b_41913	Kdm5b	9.0788/5.2505	0/14722	7.1647	7361.1	9.8165	7.3276	41.433	1142.5	1	0	0	0	TRUE
Tpk1_21436	Tpk1	85.744/13.651	10.518/48700	49.698	24355	8.9082	2598.7	453.64	1141.2	1	0	0	0	TRUE
control_79222	control	18.158/15.752	2250.8/22712	16.955	12481	9.4413	2.8942	119.62	1139.7	1	0	0	0	TRUE
Tubd1_24755	Tubd1	1.0088/0	2945/0	0.50438	1472.5	9.9359	0.50879	1.671	1138.7	1	0	0	0	TRUE
Rbm3_14507	Rbm3	0/1.0501	2923.9/89.769	0.52505	1506.9	9.9494	0.55136	1.753	1137.7	1	0	0	0	TRUE
D330045A20Rik_47443	D330045A20Rik	33.289/21.002	36.812/33304	27.145	16671	9.2103	75.481	214.12	1137.4	1	0	0	0	TRUE
Scn1a_15309	Scn1a	10.088/22.052	10.518/24058	16.07	12034	9.4616	71.578	111.96	1135.8	1	0	0	0	TRUE
Izumo2_41760	Izumo2	46.403/48.305	15.777/46815	47.354	23415	8.9197	1.8096	427.19	1130.6	1	0	0	0	TRUE
Cacnb4_1896	Cacnb4	199.73/248.88	6826/1.1692e+05	224.3	61875	8.1014	1207.5	2978.6	1129.6	1	0	0	0	TRUE
Defb6_50475	Defb6	5.0438/9.451	0/14632	7.2474	7316.2	9.7931	9.7118	42.02	1127.5	1	0	0	0	TRUE
Sele_15504	Sele	28.245/38.854	3370.9/34202	33.55	18787	9.0869	56.275	278.43	1123.9	1	0	0	0	TRUE
Ap4s1_853	Ap4s1	77.674/76.658	131.47/62973	77.166	31552	8.657	0.5161	784.67	1123.6	1	0	0	0	TRUE
Olfr857_64135	Olfr857	28.245/107.11	99.919/58036	67.678	29068	8.7254	3109.9	666.3	1123.5	1	0	0	0	TRUE
Thbd_17585	Thbd	103.9/73.508	1756.5/67058	88.704	34407	8.5834	461.89	933.63	1123.2	1	0	0	0	TRUE
Fam210b_29749	Fam210b	15.131/4.2004	10.518/17370	9.6659	8690.4	9.6705	59.742	59.847	1122.1	1	0	0	0	TRUE
Cpe_3340	Cpe	3.0263/15.752	52.589/17011	9.3889	8531.9	9.6819	80.967	57.746	1121.5	1	0	0	0	TRUE
Slc45a1_62585	Slc45a1	12.105/1.0501	21.036/13690	6.5776	6855.4	9.8215	61.105	37.31	1121.3	1	0	0	0	TRUE
Rgs13_63745	Rgs13	7.0613/4.2004	31.553/12433	5.6308	6232.3	9.8766	4.0922	30.844	1121.2	1	0	0	0	TRUE
Glrb_6534	Glrb	9.0788/13.651	21.036/19166	11.365	9593.4	9.5998	10.455	73.043	1121.2	1	0	0	0	TRUE
Pde2a_52262	Pde2a	4.035/7.3508	3691.7/8842.3	5.6929	6267	9.8712	5.4971	31.26	1119.9	1	0	0	0	TRUE
Zc3hav1l_52670	Zc3hav1l	11.096/6.3006	5.2589/16248	8.6985	8126.8	9.7109	11.499	52.572	1119.6	1	0	0	0	TRUE
control_78871	control	7.0613/12.601	15.777/17505	9.8313	8760.4	9.6598	15.346	61.109	1119.4	1	0	0	0	TRUE
Olfr1051_73624	Olfr1051	0/0	2887.1/0	0.50438	1443.6	9.9073	0	1.671	1116.3	1	0	0	0	TRUE
Cabp1_21540	Cabp1	1.0088/0	2887.1/0	0.50438	1443.6	9.9073	0.50879	1.671	1116.3	1	0	0	0	TRUE
Strbp_16574	Strbp	0/1.0501	2955.5/0	0.52505	1477.7	9.9213	0.55136	1.753	1115.7	1	0	0	0	TRUE
Olfr1217_66871	Olfr1217	57.499/36.754	31.553/46007	47.126	23019	8.9019	215.18	424.64	1114.8	1	0	0	0	TRUE
control_79108	control	30.263/16.802	26.294/29848	23.532	14937	9.2501	90.597	179.4	1113.5	1	0	0	0	TRUE
Ipp_8720	Ipp	17.149/16.802	24396/0	16.975	12198	9.4065	0.06022	119.8	1112.9	1	0	0	0	TRUE
Pld3_13242	Pld3	101.88/137.56	6415.8/75765	119.72	41091	8.411	636.54	1357.7	1111.9	1	0	0	0	TRUE
Gabrb3_6046	Gabrb3	48.42/64.057	42.071/51213	56.238	25628	8.8066	122.25	529.08	1111.7	1	0	0	0	TRUE
Mroh1_55947	Mroh1	40.35/55.656	7614.9/38780	48.003	23198	8.887	117.13	434.48	1110.6	1	0	0	0	TRUE
Irg1_8737	Irg1	0/1.0501	2934.5/0	0.52505	1467.2	9.911	0.55136	1.753	1107.8	1	0	0	0	TRUE
Lrrc27_42939	Lrrc27	47.411/26.253	4259.7/34920	36.832	19590	9.0164	223.84	312.63	1105.9	1	0	0	0	TRUE
1190005I06Rik_33620	1190005I06Rik	12.105/5.2505	5.2589/16024	8.6778	8014.5	9.6939	23.492	52.419	1105.8	1	0	0	0	TRUE
Ccl25_15395	Ccl25	121.05/100.81	7830.5/70065	110.93	38948	8.4428	204.82	1234.3	1105.5	1	0	0	0	TRUE
Cox11_35012	Cox11	1.0088/4.2004	0/7675.3	2.6046	3837.6	10.057	5.0934	12.048	1104.9	1	0	0	0	TRUE
Sncg_16246	Sncg	570.95/245.73	77484/98881	408.34	88183	7.7511	52887	6316.2	1104.4	1	0	0	0	TRUE
Tmx1_38824	Tmx1	80.7/136.51	29508/47174	108.61	38341	8.4504	1557.6	1202.1	1102.7	1	0	0	0	TRUE
Fam89b_11074	Fam89b	134.16/148.07	52.589/90039	141.11	45046	8.3082	96.623	1667.4	1099.7	1	0	0	0	TRUE
Pja2_56473	Pja2	213.86/106.06	12884/84563	159.96	48723	8.2418	5809.8	1950.5	1099.6	1	0	0	0	TRUE
Aldh1a1_610	Aldh1a1	2.0175/2.1002	6573.6/44.885	2.0589	3309.2	10.08	0.0034207	9.0582	1098.9	1	0	0	0	TRUE
control_78845	control	13.114/9.451	21.036/18627	11.282	9324.1	9.5684	6.708	72.389	1094.6	1	0	0	0	TRUE
Atf4_1182	Atf4	42.368/150.17	26.294/70514	96.266	35270	8.5023	5810.2	1034	1093.9	1	0	0	0	TRUE
Gcnt4_55607	Gcnt4	13.114/3.1503	15235/0	8.132	7617.5	9.7044	49.635	48.4	1093.8	1	0	0	0	TRUE
Commd5_28261	Commd5	3.0263/4.2004	9260.9/0	3.6133	4630.4	9.9714	0.68935	17.942	1092.3	1	0	0	0	TRUE
Zkscan8_45607	Zkscan8	18.158/16.802	63.107/24283	17.48	12173	9.3636	0.91909	124.21	1090.7	1	0	0	0	TRUE
Tcea2_17187	Tcea2	13.114/11.551	47.33/19570	12.332	9808.5	9.5231	1.2208	80.774	1090	1	0	0	0	TRUE
Pid1_46492	Pid1	8.07/18.902	5.2589/20647	13.486	10326	9.4776	58.665	90.184	1085.9	1	0	0	0	TRUE
Sla_15895	Sla	3.0263/4.2004	0/9201.4	3.6133	4600.7	9.9621	0.68935	17.942	1085.3	1	0	0	0	TRUE
9330159F19Rik_53477	9330159F19Rik	16.14/9.451	0/19929	12.795	9964.4	9.4966	22.372	84.527	1082.4	1	0	0	0	TRUE
Krt6b_9546	Krt6b	4.035/3.1503	21.036/9111.6	3.5927	4566.3	9.9578	0.39133	17.817	1080.9	1	0	0	0	TRUE
Recql4_44661	Recql4	0/0	2792.5/0	0.50438	1396.2	9.8592	0	1.671	1079.7	1	0	0	0	TRUE
Hadh_7326	Hadh	32.28/57.756	36.812/43224	45.018	21630	8.8767	324.51	401.15	1077.7	1	0	0	0	TRUE
Cep250_8676	Cep250	32.28/26.253	29460/3635.7	29.266	16548	9.0948	18.164	235.04	1077.5	1	0	0	0	TRUE
Hddc2_34830	Hddc2	10.088/7.3508	10.518/15620	8.7191	7815.2	9.6514	3.7449	52.726	1075.1	1	0	0	0	TRUE
Terf1_17418	Terf1	5.0438/0	0/7316.2	2.5219	3658.1	10.021	12.72	11.585	1074	1	0	0	0	TRUE
Vmn1r184_78238	Vmn1r184	56.49/58.806	7472.9/42775	57.648	25124	8.7428	2.6819	545.64	1073.1	1	0	0	0	TRUE
Olfr693_65272	Olfr693	938.14/852.69	53714/2.2752e+05	895.41	140620	7.2934	3650.9	16957	1073	1	0	0	0	TRUE
Irgc1_52958	Irgc1	17.149/7.3508	5.2589/19166	12.25	9585.5	9.4989	48.001	80.107	1069.6	1	0	0	0	TRUE
Odc1_12077	Odc1	1.0088/0	2766.2/0	0.50438	1383.1	9.8456	0.50879	1.671	1069.5	1	0	0	0	TRUE
Hoxd12_7880	Hoxd12	10.088/6.3006	0/14947	8.1941	7473.3	9.667	7.1702	48.853	1068	1	0	0	0	TRUE
Vmn2r72_62993	Vmn2r72	19.166/34.654	68.366/31060	26.91	15564	9.1233	119.93	211.82	1067.6	1	0	0	0	TRUE
Arhgap21_36810	Arhgap21	19.166/9.451	0/21051	14.309	10525	9.4255	47.194	97.015	1067.2	1	0	0	0	TRUE
Herc1_60508	Herc1	16.14/31.503	99.919/28726	23.822	14413	9.1817	118.01	182.14	1066.2	1	0	0	0	TRUE
Flna_51767	Flna	93.814/135.46	2971.3/73701	114.64	38336	8.373	867.36	1286	1065.8	1	0	0	0	TRUE
Vmn1r211_51602	Vmn1r211	1.0088/3.1503	26.294/6418.5	2.0795	3222.4	10.032	2.2932	9.1685	1063.5	1	0	0	0	TRUE
4933411K16Rik_29122	4933411K16Rik	0/0	2750.4/0	0.50438	1375.2	9.8373	0	1.671	1063.4	1	0	0	0	TRUE
Rgl1_14706	Rgl1	45.394/57.756	4675.1/41743	51.575	23209	8.7862	76.411	475.05	1062.5	1	0	0	0	TRUE
Dnal4_23311	Dnal4	5.0438/4.2004	10.518/10458	4.6221	5234.3	9.863	0.3556	24.23	1062.4	1	0	0	0	TRUE
Trps1_45435	Trps1	537.66/589.11	78042/1.2967e+05	563.39	103860	7.5237	1323.3	9465.3	1061.7	1	0	0	0	TRUE
Olfr427_67677	Olfr427	60.525/76.658	18890/36491	68.591	27691	8.6363	130.13	677.52	1061.2	1	0	0	0	TRUE
Gucy2g_39677	Gucy2g	15.131/7.3508	36.812/17999	11.241	9017.8	9.5251	30.268	72.063	1061	1	0	0	0	TRUE
Sec22c_54384	Sec22c	41.359/59.856	24070/21590	50.607	22830	8.7892	171.08	463.99	1057.5	1	0	0	0	TRUE
Smr2_16176	Smr2	75.656/45.155	2634.7/48296	60.405	25465	8.696	465.18	578.32	1056.4	1	0	0	0	TRUE
Ccdc60_68395	Ccdc60	75.656/116.56	63.107/67821	96.109	33942	8.4493	836.64	1031.9	1053.6	1	0	0	0	TRUE
Vmn2r104_18636	Vmn2r104	37.324/98.71	17817/36850	68.017	27334	8.6296	1884.1	670.46	1053	1	0	0	0	TRUE
Tomt_77078	Tomt	56.49/48.305	21.036/46321	52.398	23171	8.7614	33.498	484.5	1050.3	1	0	0	0	TRUE
Ptpru_14149	Ptpru	8.07/30.453	36.812/24821	19.262	12429	9.2609	250.5	140.04	1048.7	1	0	0	0	TRUE
1700024P16Rik_62479	1700024P16Rik	8.07/6.3006	15.777/13510	7.1853	6763	9.6906	1.5653	41.58	1047.7	1	0	0	0	TRUE
Kcnj8_9091	Kcnj8	0/4.2004	0/6373.6	2.1002	3186.8	10.006	8.8218	9.2791	1045.5	1	0	0	0	TRUE
Gbp9_60728	Gbp9	12.105/10.501	5.2589/17819	11.303	8912.2	9.5008	1.2863	72.552	1045	1	0	0	0	TRUE
Gnptab_73863	Gnptab	7.0613/12.601	10.518/16338	9.8313	8174.3	9.5599	15.346	61.109	1044.4	1	0	0	0	TRUE
Rgn_14711	Rgn	6.0525/8.4009	57.848/13465	7.2267	6761.6	9.6831	2.7574	41.873	1043.8	1	0	0	0	TRUE
Cd82_2507	Cd82	12.105/7.3508	63.107/16158	9.7279	8110.8	9.5625	11.301	60.32	1043.1	1	0	0	0	TRUE
Ly6c1_10083	Ly6c1	8.07/18.902	10986/8842.3	13.486	9914	9.4188	58.665	90.184	1042.5	1	0	0	0	TRUE
Ppwd1_61335	Ppwd1	4.035/1.0501	0/7136.7	2.5426	3568.3	9.9766	4.4548	11.7	1042.5	1	0	0	0	TRUE
1700088E04Rik_21191	1700088E04Rik	36.315/2.1002	15866/8797.4	19.208	12332	9.2534	585.33	139.55	1042.3	1	0	0	0	TRUE
Pim1_12997	Pim1	31.271/33.603	12995/21096	32.437	17045	8.9938	2.7195	267.02	1041.1	1	0	0	0	TRUE
Myo5b_11271	Myo5b	5.0438/0	0/7091.8	2.5219	3545.9	9.976	12.72	11.585	1041	1	0	0	0	TRUE
Mcts1_33764	Mcts1	56.49/63.006	5011.7/44795	59.748	24903	8.6793	21.232	570.5	1040.1	1	0	0	0	TRUE
Thap2_29225	Thap2	1.0088/2.1002	5285.2/0	1.5545	2642.6	10.015	0.59565	6.4478	1040.1	1	0	0	0	TRUE
Lpcat3_6899	Lpcat3	6.0525/2.1002	0/9470.7	4.0764	4735.3	9.8658	7.8103	20.784	1037.8	1	0	0	0	TRUE
Stab2_51777	Stab2	15.131/23.102	0/24462	19.117	12231	9.2481	31.769	138.74	1036.8	1	0	0	0	TRUE
Dgkd_57286	Dgkd	96.84/7.3508	5.2589/45334	52.095	22669	8.738	4004.2	481.03	1031.2	1	0	0	0	TRUE
Ptprt_14171	Ptprt	248.15/49.355	9423.9/77875	148.75	43649	8.1873	19760	1781.1	1030.7	1	0	0	0	TRUE
Hoxb6_7822	Hoxb6	30.263/8.4009	24422/44.885	19.332	12234	9.233	238.97	140.67	1029.8	1	0	0	0	TRUE
Krt222_67920	Krt222	176.53/11.551	36313/29130	94.041	32721	8.4275	13609	1004.2	1029.6	1	0	0	0	TRUE
Ptpn20_14092	Ptpn20	4.035/2.1002	0/7899.7	3.0676	3949.8	9.9238	1.8717	14.699	1029.4	1	0	0	0	TRUE
Tat_60217	Tat	25.219/9.451	21.036/22801	17.335	11411	9.2818	124.31	122.94	1027.6	1	0	0	0	TRUE
Ttc39b_35093	Ttc39b	8.07/10.501	42.071/15485	9.2855	7763.6	9.5602	2.955	56.966	1027.4	1	0	0	0	TRUE
Cd38_2415	Cd38	4.035/8.4009	0/12119	6.2179	6059.4	9.7136	9.5304	34.826	1025.7	1	0	0	0	TRUE
Gm648_68635	Gm648	63.551/10.501	42.071/36401	37.026	18222	8.9045	1407.2	314.68	1025.1	1	0	0	0	TRUE
Myzap_47341	Myzap	2.0175/2.1002	0/6149.2	2.0589	3074.6	9.9737	0.0034207	9.0582	1020.9	1	0	0	0	TRUE
Hrct1_77295	Hrct1	13.114/6.3006	5.2589/15844	9.7072	7924.8	9.5318	23.209	60.162	1020.5	1	0	0	0	TRUE
Lcn5_5085	Lcn5	11.096/12.601	0/17909	11.849	8954.5	9.445	1.1326	76.89	1019.8	1	0	0	0	TRUE
Kdelc1_37892	Kdelc1	7.0613/60.906	11990/22353	33.984	17171	8.9392	1449.6	282.91	1018.9	1	0	0	0	TRUE
Ifnz_69165	Ifnz	2.0175/12.601	0/13286	7.3094	6642.9	9.6431	56.008	42.462	1018.3	1	0	0	0	TRUE
4931431F19Rik_36391	4931431F19Rik	8.07/7.3508	36.812/13690	7.7104	6863.3	9.6222	0.25866	45.338	1018.2	1	0	0	0	TRUE
Csnk1g2_47503	Csnk1g2	4.035/23.102	21.036/19390	13.569	9705.6	9.38	181.78	90.866	1016.7	1	0	0	0	TRUE
Arsb_1127	Arsb	11.096/14.702	0/18807	12.899	9403.3	9.4022	6.4989	85.37	1016.3	1	0	0	0	TRUE
Adam24_4522	Adam24	3.0263/3.1503	10.518/7809.9	3.0883	3910.2	9.9019	0.0076967	14.82	1014.9	1	0	0	0	TRUE
control_79179	control	11.096/7.3508	5.2589/15261	9.2235	7633	9.5444	7.0144	56.498	1014.3	1	0	0	0	TRUE
Tbx1_17143	Tbx1	16.14/14.702	6484.2/14453	15.421	10469	9.3165	1.0347	106.4	1013.4	1	0	0	0	TRUE
A830080D01Rik_72905	A830080D01Rik	353.06/391.69	71153/81555	372.38	76354	7.6759	746.03	5625.6	1013	1	0	0	0	TRUE
Frzb_15625	Frzb	14.123/10.501	15.777/18133	12.312	9074.6	9.4131	6.5574	80.607	1009.4	1	0	0	0	TRUE
Ric8_47123	Ric8	3134.2/2918.2	1.577e+05/4.1491e+05	3026.2	286310	6.5634	23315	78790	1009.2	1	0	0	0	TRUE
Plcxd1_73488	Plcxd1	153.33/201.62	136.73/95290	177.48	47713	8.0626	1166	2221.4	1008.6	1	0	0	0	TRUE
Tor1b_21734	Tor1b	7.0613/11.551	31.553/15216	9.3062	7623.7	9.531	10.08	57.122	1007.5	1	0	0	0	TRUE
Cort_3276	Cort	57.499/31.503	15.777/40082	44.501	20049	8.7835	337.89	395.43	1006	1	0	0	0	TRUE
Aldh1b1_38592	Aldh1b1	7.0613/4.2004	0/11176	5.6308	5588.1	9.7192	4.0922	30.844	1005.2	1	0	0	0	TRUE
Cnppd1_34046	Cnppd1	48.42/31.503	11917/25539	39.962	18728	8.8368	143.09	345.95	1004.7	1	0	0	0	TRUE
Ccdc74a_38327	Ccdc74a	1.0088/1.0501	26.294/3949.8	1.0294	1988.1	9.9368	0.00085518	3.9242	1003.1	1	0	0	0	TRUE
Olfr1437_64333	Olfr1437	7.0613/2.1002	9781.5/44.885	4.5807	4913.2	9.7823	12.306	23.965	1002.7	1	0	0	0	TRUE
Klra5_9395	Klra5	9.0788/13.651	15.777/17146	11.365	8580.9	9.4389	10.455	73.043	1002.7	1	0	0	0	TRUE
Ina_56902	Ina	3.0263/7.3508	26.294/10548	5.1885	5287.1	9.7389	9.3507	27.906	999.86	1	0	0	0	TRUE
Hadh_7329	Hadh	20.175/4.2004	17859/0	12.188	8929.6	9.4034	127.59	79.608	999.45	1	0	0	0	TRUE
Gtpbp1_7110	Gtpbp1	15.131/7.3508	5.2589/16966	11.241	8485.8	9.4374	30.268	72.063	998.31	1	0	0	0	TRUE
Ssna1_32901	Ssna1	238.07/185.87	59131/46411	211.97	52771	7.953	1362.2	2774.8	997.77	1	0	0	0	TRUE
Fam129a_26760	Fam129a	4.035/1.0501	5.2589/6822.5	2.5426	3413.9	9.9128	4.4548	11.7	997.3	1	0	0	0	TRUE
Gm11554_76987	Gm11554	9.0788/14.702	0/17550	11.89	8775	9.4111	15.808	77.22	997.22	1	0	0	0	TRUE
Pkn1_70339	Pkn1	0/7.3508	0/8528.1	3.6754	4264	9.8333	27.017	18.318	995.41	1	0	0	0	TRUE
Mical3_52024	Mical3	10.088/5.2505	0/13376	7.669	6687.8	9.5917	11.698	45.039	995.38	1	0	0	0	TRUE
Naa30_36019	Naa30	4.035/2.1002	7635.9/0	3.0676	3818	9.8748	1.8717	14.699	995.03	1	0	0	0	TRUE
Otp_12393	Otp	0/0	2571.6/0	0.50438	1285.8	9.7404	0	1.671	994.29	1	0	0	0	TRUE
Psg18_20309	Psg18	6.0525/7.3508	0/12298	6.7016	6149.2	9.6413	0.84272	38.174	994.17	1	0	0	0	TRUE
Scarb1_16658	Scarb1	65.569/106.06	32600/27065	85.815	29833	8.4248	819.8	895.83	993.86	1	0	0	0	TRUE
Fam26d_68649	Fam26d	5.0438/0	36.812/6732.7	2.5219	3384.8	9.9089	12.72	11.585	993.71	1	0	0	0	TRUE
Cox7a2_3313	Cox7a2	21.184/5.2505	15.777/18627	13.217	9321.5	9.3569	126.93	87.973	992.41	1	0	0	0	TRUE
Slc30a9_49337	Slc30a9	23.201/12.601	26.294/22442	17.901	11234	9.2153	56.18	127.92	991.71	1	0	0	0	TRUE
Hfm1_71054	Hfm1	4.035/0	5900.5/0	2.0175	2950.2	9.9337	8.1406	8.8382	991.69	1	0	0	0	TRUE
Olfr970_65809	Olfr970	5.0438/0	21.036/6732.7	2.5219	3376.9	9.9056	12.72	11.585	991.39	1	0	0	0	TRUE
Svs4_16949	Svs4	15.131/23.102	21.036/23340	19.117	11681	9.1816	31.769	138.74	990.05	1	0	0	0	TRUE
Dennd4c_70978	Dennd4c	30.263/17.852	0/26886	24.057	13443	9.0675	77.013	184.37	988.26	1	0	0	0	TRUE
Olfr533_64244	Olfr533	4.035/3.1503	0/8348.5	3.5927	4174.3	9.8283	0.39133	17.817	988.07	1	0	0	0	TRUE
Birc3_886	Birc3	15.131/25.203	10.518/24058	20.167	12034	9.1512	50.716	148.22	986.83	1	0	0	0	TRUE
Zc3h8_25768	Zc3h8	8.07/10.501	10.518/14902	9.2855	7456.1	9.5019	2.955	56.966	986.65	1	0	0	0	TRUE
Plxna4_62824	Plxna4	33.289/63.006	5.2589/41294	48.148	20650	8.7148	441.57	436.11	986.5	1	0	0	0	TRUE
Zdhhc23_71412	Zdhhc23	7.0613/13.651	36.812/15889	10.356	7963	9.4539	21.715	65.148	985.28	1	0	0	0	TRUE
Fcgrt_5458	Fcgrt	13.114/9.451	21.036/16742	11.282	8381.5	9.4146	6.708	72.389	983.79	1	0	0	0	TRUE
Rab6b_68614	Rab6b	50.438/85.059	1456.7/49463	67.748	25460	8.5327	599.31	667.16	983.07	1	0	0	0	TRUE
F2rl1_5290	F2rl1	2.0175/4.2004	5.2589/7585.5	3.109	3795.4	9.8516	2.3826	14.941	981.1	1	0	0	0	TRUE
Pclo_20473	Pclo	23.201/11.551	84.142/21724	17.376	10904	9.213	67.862	123.3	980.43	1	0	0	0	TRUE
Hps1_51837	Hps1	278.42/177.47	4464.8/1.0409e+05	227.94	54276	7.8892	5095.2	3039.3	980.39	1	0	0	0	TRUE
Ugt1a6b_73412	Ugt1a6b	1.0088/4.2004	5.2589/6777.6	2.6046	3391.4	9.8783	5.0934	12.048	976.32	1	0	0	0	TRUE
Kif14_72296	Kif14	9.0788/6.3006	31.553/13106	7.6897	6568.9	9.5624	3.859	45.188	976.05	1	0	0	0	TRUE
Pltp_13300	Pltp	25.219/6.3006	2650.5/17774	15.76	10212	9.2513	178.95	109.3	975.34	1	0	0	0	TRUE
Lrrc38_62568	Lrrc38	6.0525/4.2004	10239/0	5.1265	5119.5	9.707	1.7151	27.499	975.29	1	0	0	0	TRUE
Hunk_20411	Hunk	48.42/45.155	21.036/40082	46.787	20052	8.7129	5.3315	420.84	975.15	1	0	0	0	TRUE
Txnrd1_21849	Txnrd1	6.0525/1.0501	10.518/8169	3.5513	4089.8	9.8119	12.512	17.568	974.91	1	0	0	0	TRUE
Fasn_5380	Fasn	0/0	2519/0	0.50438	1259.5	9.7106	0	1.671	973.95	1	0	0	0	TRUE
Apol8_61527	Apol8	47.411/40.954	3213.2/35414	44.183	19314	8.7397	20.847	391.92	973.35	1	0	0	0	TRUE
Defb11_63618	Defb11	17.149/26.253	21.036/24821	21.701	12421	9.096	41.441	162.29	973.33	1	0	0	0	TRUE
Atf5_48599	Atf5	1.0088/84.009	13894/23789	42.509	18841	8.7585	3444.5	373.55	972.65	1	0	0	0	TRUE
Sprr2a2_78204	Sprr2a2	9.0788/10.501	3828.5/11356	9.7899	7592.1	9.4589	1.0115	60.793	972.47	1	0	0	0	TRUE
Pi15_46173	Pi15	0/0	2513.7/0	0.50438	1256.9	9.7076	0	1.671	971.91	1	0	0	0	TRUE
Rasd1_14465	Rasd1	33.289/65.107	20978/20198	49.198	20588	8.68	506.19	447.97	970.39	1	0	0	0	TRUE
Tsku_63007	Tsku	51.446/87.159	120.95/50854	69.303	25488	8.5021	637.7	686.28	970.28	1	0	0	0	TRUE
Wtip_47149	Wtip	8.07/4.2004	5.2589/11356	6.1352	5680.5	9.6371	7.4868	34.26	969.46	1	0	0	0	TRUE
Sptbn1_16563	Sptbn1	20.175/33.603	21.036/28232	26.889	14127	8.9846	90.161	211.62	969.26	1	0	0	0	TRUE
Nmb_32179	Nmb	14.123/18.902	20757/89.769	16.512	10423	9.2174	11.421	115.77	967.19	1	0	0	0	TRUE
Egln2_50119	Egln2	17.149/1.0501	15.777/14408	9.0994	7211.9	9.4802	129.58	55.566	966.27	1	0	0	0	TRUE
Rps6kc1_69872	Rps6kc1	26.228/56.706	21.036/36805	41.467	18413	8.7603	464.46	362.21	965.32	1	0	0	0	TRUE
Fkbp14_59136	Fkbp14	129.12/144.91	5832.1/71771	137.02	38801	8.1351	124.74	1607.1	964.47	1	0	0	0	TRUE
Hist1h1c_21923	Hist1h1c	59.516/54.606	44827/0	57.061	22413	8.5926	12.058	538.73	963.19	1	0	0	0	TRUE
Zfp629_70249	Zfp629	9.0788/0	42.071/9336	4.5394	4689	9.7257	41.212	23.701	962.23	1	0	0	0	TRUE
C330007P06Rik_43740	C330007P06Rik	10.088/5.2505	0/12927	7.669	6463.4	9.5424	11.698	45.039	961.94	1	0	0	0	TRUE
Vmn1r169_77880	Vmn1r169	19.166/10.501	0/19390	14.834	9695.1	9.2583	37.543	101.43	961.2	1	0	0	0	TRUE
Cyb561d1_37839	Cyb561d1	12.105/10.501	5.2589/16383	11.303	8194.1	9.3796	1.2863	72.552	960.67	1	0	0	0	TRUE
control_78720	control	121.05/49.355	32253/25135	85.203	28694	8.3789	2570.1	887.87	960.12	1	0	0	0	TRUE
Gpr152_68163	Gpr152	18.158/14.702	15.777/20602	16.43	10309	9.2083	5.972	115.06	959.54	1	0	0	0	TRUE
Mmgt1_60779	Mmgt1	10.088/22.052	20310/0	16.07	10155	9.2166	71.578	111.96	958.22	1	0	0	0	TRUE
Mme_10743	Mme	4.035/0	0/5700.4	2.0175	2850.2	9.884	8.1406	8.8382	958.04	1	0	0	0	TRUE
Elfn1_62698	Elfn1	25.219/16.802	0/23924	21.01	11962	9.0862	35.423	155.92	956.26	1	0	0	0	TRUE
Tsc1_27109	Tsc1	357.1/693.07	1.4372e+05/35324	525.08	89522	7.4108	56439	8663.4	956.16	1	0	0	0	TRUE
Pth_14011	Pth	5.0438/3.1503	0/8752.5	4.097	4376.3	9.7462	1.7925	20.913	956.07	1	0	0	0	TRUE
Tecrl_62644	Tecrl	32.28/64.057	1619.7/38376	48.168	19998	8.668	504.87	436.35	955.05	1	0	0	0	TRUE
Vsig10_58964	Vsig10	54.473/133.36	31.553/60594	93.918	30313	8.3191	3111.9	1002.6	954.37	1	0	0	0	TRUE
Efna4_4714	Efna4	22.193/35.704	0/29040	28.948	14520	8.9215	91.275	231.88	951.65	1	0	0	0	TRUE
Ctif_68160	Ctif	252.19/155.42	14635/83575	203.8	49105	7.9055	4682.4	2641.5	951.47	1	0	0	0	TRUE
Rnf165_56696	Rnf165	7.0613/0	0/7944.6	3.5306	3972.3	9.7764	24.931	17.443	950.26	1	0	0	0	TRUE
Elac2_33159	Elac2	0/4.2004	0/5790.1	2.1002	2895.1	9.8675	8.8218	9.2791	949.71	1	0	0	0	TRUE
Olfr114_64666	Olfr114	40.35/4.2004	15.777/24597	22.275	12306	9.0465	653.4	167.62	948.81	1	0	0	0	TRUE
Hba-x_7375	Hba-x	16.14/8.4009	0/17011	12.27	8505.6	9.3242	29.947	80.274	947.97	1	0	0	0	TRUE
4933417A18Rik_29111	4933417A18Rik	43.376/34.654	14888/19929	39.015	17408	8.7651	38.043	335.8	947.86	1	0	0	0	TRUE
Gm5114_71210	Gm5114	16.14/5.2505	0/15620	10.695	7809.9	9.3834	59.29	67.781	947.32	1	0	0	0	TRUE
Olfr734_66005	Olfr734	63.551/13.651	34551/0	38.601	17275	8.769	1245	331.38	946.87	1	0	0	0	TRUE
Sytl4_20962	Sytl4	24.21/72.457	2450.6/37254	48.334	19852	8.6526	1163.9	438.21	946.05	1	0	0	0	TRUE
Atp9b_22006	Atp9b	0/0	2440.1/0	0.50438	1220.1	9.6648	0	1.671	943.43	1	0	0	0	TRUE
Ppt2_23561	Ppt2	139.21/79.808	49313/16518	109.51	32915	8.2185	1764.1	1214.5	941.34	1	0	0	0	TRUE
Fndc9_69861	Fndc9	14.123/12.601	52.589/17729	13.362	8891	9.2741	1.1571	89.162	940.17	1	0	0	0	TRUE
Arfip2_43302	Arfip2	7.0613/29.403	0/21545	18.232	10772	9.1297	249.58	130.85	940.14	1	0	0	0	TRUE
1700042B14Rik_39372	1700042B14Rik	30.263/17.852	4222.9/21320	24.057	12772	8.9936	77.013	184.37	938.82	1	0	0	0	TRUE
Fam189a2_72237	Fam189a2	21.184/21.002	7236.2/16293	21.093	11765	9.0568	0.016493	156.68	938.19	1	0	0	0	TRUE
Clec5a_19484	Clec5a	1.0088/6.3006	21.036/7989.5	3.6547	4005.3	9.7493	14.002	18.193	938.17	1	0	0	0	TRUE
Psap_13822	Psap	14.123/14.702	5.2589/18582	14.412	9293.8	9.2362	0.16762	97.881	937.93	1	0	0	0	TRUE
S100a8_15175	S100a8	38.333/50.405	0/37254	44.369	18627	8.6816	72.874	393.97	936.22	1	0	0	0	TRUE
Fam84b_73450	Fam84b	1.0088/5.2505	0/7271.3	3.1296	3635.7	9.7824	8.9964	15.062	935.99	1	0	0	0	TRUE
Armc9_44418	Armc9	13.114/10.501	15.777/16383	11.807	8199.3	9.3226	3.4131	76.559	935.74	1	0	0	0	TRUE
Elovl6_50900	Elovl6	4.035/5.2505	0/9246.2	4.6428	4623.1	9.6786	0.73876	24.362	935.71	1	0	0	0	TRUE
Gm15293_77608	Gm15293	42.368/24.152	63.107/31060	33.26	15562	8.8273	165.89	275.45	935.63	1	0	0	0	TRUE
D2hgdh_46432	D2hgdh	2.0175/3.1503	5.2589/6463.4	2.5839	3234.3	9.8182	0.64164	11.932	935.58	1	0	0	0	TRUE
Zfp418_59444	Zfp418	13.114/10.501	0/16383	11.807	8191.4	9.3212	3.4131	76.559	934.84	1	0	0	0	TRUE
Gja3_6435	Gja3	2.0175/0	3660.2/0	1.0088	1830.1	9.8322	2.0352	3.8296	934.66	1	0	0	0	TRUE
Adh6a_33943	Adh6a	22.193/1.0501	15.777/16203	11.621	8109.6	9.3278	223.5	75.076	934.6	1	0	0	0	TRUE
Pald1_20943	Pald1	17.149/5.2505	5.2589/15844	11.2	7924.8	9.3436	70.784	71.736	934.34	1	0	0	0	TRUE
Gid8_42716	Gid8	25.219/28.353	21109/6059.4	26.786	13584	8.9335	4.9114	210.61	934.2	1	0	0	0	TRUE
Cebpzos_33056	Cebpzos	211.84/103.96	105.18/82049	157.9	41077	8.0141	5818.7	1919.1	934.06	1	0	0	0	TRUE
Ppp1r21_39795	Ppp1r21	31.271/19.952	3386.7/22981	25.612	13184	8.9526	64.063	199.23	932.22	1	0	0	0	TRUE
Tox_63824	Tox	1.0088/7.3508	21.036/8617.9	4.1798	4319.4	9.7041	20.111	21.429	932.19	1	0	0	0	TRUE
Edf1_26418	Edf1	273.37/226.82	147.25/1.092e+05	250.1	54676	7.7665	1083.4	3414	931.48	1	0	0	0	TRUE
Nr2f6_5087	Nr2f6	95.831/255.18	87413/89.769	175.5	43751	7.9535	12695	2190.6	931.04	1	0	0	0	TRUE
Cyp4x1_45150	Cyp4x1	14.123/23.102	10.518/21590	18.612	10800	9.1052	40.319	134.23	930.58	1	0	0	0	TRUE
Slc22a28_74333	Slc22a28	2.0175/7.3508	2803/6418.5	4.6841	4610.7	9.6642	14.222	24.627	928.15	1	0	0	0	TRUE
Nhlrc1_47985	Nhlrc1	19.166/27.303	26.294/24687	23.235	12356	8.9941	33.102	176.6	928.08	1	0	0	0	TRUE
Psg18_20307	Psg18	22.193/23.102	57.848/24238	22.647	12148	9.0049	0.41391	171.09	926.99	1	0	0	0	TRUE
Btg2_1754	Btg2	246.14/336.03	56591/63108	291.08	59849	7.6788	4040.9	4129.8	926.79	1	0	0	0	TRUE
Scamp5_25391	Scamp5	42.368/37.804	47.33/34561	40.086	17304	8.7184	10.414	347.28	926.41	1	0	0	0	TRUE
Olfr1234_67128	Olfr1234	7.0613/3.1503	0/9695.1	5.1058	4847.5	9.6332	7.6477	27.363	925.72	1	0	0	0	TRUE
Scly_22141	Scly	27.236/21.002	25159/44.885	24.119	12602	8.9707	19.432	184.96	924.83	1	0	0	0	TRUE
Nbr1_11381	Nbr1	13.114/6.3006	0/14363	9.7072	7181.5	9.3898	23.209	60.162	924.63	1	0	0	0	TRUE
Zfp426_60334	Zfp426	9.0788/14.702	31.553/16203	11.89	8117.5	9.2988	15.808	77.22	922.4	1	0	0	0	TRUE
Cpt1a_3366	Cpt1a	17.149/11.551	36.812/18178	14.35	9107.5	9.2128	15.666	97.361	921.56	1	0	0	0	TRUE
Pafah1b1_12478	Pafah1b1	0/0	2377/0	0.50438	1188.5	9.627	0	1.671	919.02	1	0	0	0	TRUE
Olfr736_66013	Olfr736	2.0175/7.3508	63.107/9066.7	4.6841	4564.9	9.6497	14.222	24.627	918.92	1	0	0	0	TRUE
Arl14epl_72201	Arl14epl	1.0088/9.451	5.2589/9740	5.2299	4872.6	9.6116	35.636	28.179	916.93	1	0	0	0	TRUE
9530068E07Rik_53858	9530068E07Rik	8.07/4.2004	5.2589/10727	6.1352	5366.3	9.555	7.4868	34.26	915.78	1	0	0	0	TRUE
Vmn1r52_50168	Vmn1r52	18.158/10.501	26.294/18044	14.329	9035	9.2032	29.311	97.188	915.02	1	0	0	0	TRUE
Pgrmc2_36183	Pgrmc2	16.14/12.601	0/18089	14.371	9044.3	9.2008	6.2613	97.534	914.33	1	0	0	0	TRUE
Ntn4_25880	Ntn4	40.35/24.152	15.777/29803	32.251	14910	8.8087	131.18	265.12	913.69	1	0	0	0	TRUE
Oscp1_58490	Oscp1	11.096/15.752	5.2589/17325	13.424	8665.4	9.2308	10.836	89.673	913.66	1	0	0	0	TRUE
Olfr456_67655	Olfr456	16.14/39.904	19579/7675.3	28.022	13627	8.8752	282.37	222.72	911.23	1	0	0	0	TRUE
Slc25a21_55303	Slc25a21	187.63/31.503	68.366/63646	109.57	31857	8.1706	12187	1215.3	910.69	1	0	0	0	TRUE
6820408C15Rik_57752	6820408C15Rik	192.67/135.46	3812.7/78234	164.07	41023	7.9573	1636.4	2013.4	910.6	1	0	0	0	TRUE
Prkar2b_13663	Prkar2b	58.508/174.32	3023.9/63063	116.41	33043	8.1367	6706	1310.9	909.42	1	0	0	0	TRUE
Sp110_49291	Sp110	5.0438/10.501	3702.3/8617.9	7.7724	6160.1	9.456	14.891	45.786	909.22	1	0	0	0	TRUE
Cdon_25928	Cdon	65.569/6.3006	36.812/31689	35.935	15863	8.7465	1756.4	303.2	908.92	1	0	0	0	TRUE
Dgkg_49770	Dgkg	1.0088/1.0501	3602.3/0	1.0294	1801.2	9.7944	0.00085518	3.9242	908.72	1	0	0	0	TRUE
C1qb_1802	C1qb	73.639/55.656	26.294/45648	64.647	22837	8.4425	161.7	629.33	907.75	1	0	0	0	TRUE
Klhl3_78371	Klhl3	24.21/7.3508	15.777/18986	15.78	9501	9.1453	142.12	109.47	906.56	1	0	0	0	TRUE
Anks6_42042	Anks6	9.0788/9.451	26.294/13645	9.2649	6835.6	9.3794	0.06927	56.81	905.69	1	0	0	0	TRUE
Ebag9_23933	Ebag9	8.07/0	0/8213.9	4.035	4106.9	9.6722	32.563	20.527	905.58	1	0	0	0	TRUE
Cited2_10929	Cited2	16.14/8.4009	0/16248	12.27	8124.1	9.258	29.947	80.274	905.38	1	0	0	0	TRUE
Il15_8497	Il15	8.07/6.3006	0/11670	7.1853	5835	9.4777	1.5653	41.58	903.79	1	0	0	0	TRUE
Cd52_19466	Cd52	18.158/11.551	63.107/18178	14.854	9120.7	9.1683	21.822	101.6	903.39	1	0	0	0	TRUE
Tmigd1_28747	Tmigd1	23.201/28.353	15.777/25629	25.777	12822	8.9036	13.27	200.83	902.99	1	0	0	0	TRUE
Ly6g6c_32889	Ly6g6c	29.254/29.403	31.553/27739	29.328	13885	8.8388	0.011135	235.66	902.59	1	0	0	0	TRUE
Brd9_48007	Brd9	5.0438/2.1002	5.2589/7585.5	3.572	3795.4	9.6976	4.3322	17.692	901.47	1	0	0	0	TRUE
Itga1_49578	Itga1	0/0	2324.4/0	0.50438	1162.2	9.5947	0	1.671	898.68	1	0	0	0	TRUE
Mettl2_22683	Mettl2	14.123/117.61	10.518/45737	65.867	22874	8.4183	5355	644.16	898.65	1	0	0	0	TRUE
A230065H16Rik_72018	A230065H16Rik	2.0175/2.1002	5411.4/0	2.0589	2705.7	9.7893	0.0034207	9.0582	898.31	1	0	0	0	TRUE
Olfr1461_64725	Olfr1461	14.123/12.601	5.2589/16966	13.362	8485.8	9.2068	1.1571	89.162	897.26	1	0	0	0	TRUE
Pcdha10_3479	Pcdha10	10.088/7.3508	57.848/12972	8.7191	6514.8	9.3889	3.7449	52.726	895.99	1	0	0	0	TRUE
Rnf220_29079	Rnf220	11.096/16.802	42.071/17325	13.949	8683.8	9.1823	16.276	94.017	894.14	1	0	0	0	TRUE
Slc20a2_15990	Slc20a2	5.0438/18.902	0/15799	11.973	7899.7	9.2503	96.025	77.883	893.78	1	0	0	0	TRUE
control_79602	control	355.08/515.6	1.0935e+05/39274	435.34	74311	7.412	12884	6845.2	892.91	1	0	0	0	TRUE
Gal3st3_74858	Gal3st3	93.814/115.51	8777.1/51932	104.66	30354	8.1663	235.4	1147.8	892.88	1	0	0	0	TRUE
Olfr1431_65129	Olfr1431	17.149/7.3508	26.294/15979	12.25	8002.6	9.2385	48.001	80.107	892.75	1	0	0	0	TRUE
Rnf31_68016	Rnf31	5.0438/18.902	0/15755	11.973	7877.3	9.2462	96.025	77.883	891.24	1	0	0	0	TRUE
Nmt1_11730	Nmt1	142.23/195.32	81355/359.08	168.78	40857	7.9108	1409.1	2086	890.87	1	0	0	0	TRUE
Zfp148_19101	Zfp148	6.0525/17.852	0/15710	11.952	7854.8	9.2444	69.612	77.717	889.65	1	0	0	0	TRUE
Cyp2b13_3854	Cyp2b13	4.035/3.1503	15.777/7495.7	3.5927	3755.8	9.6759	0.39133	17.817	888.92	1	0	0	0	TRUE
Prepl_53867	Prepl	25.219/28.353	99.919/25719	26.786	12909	8.86	4.9114	210.61	887.7	1	0	0	0	TRUE
Ptpro_14162	Ptpro	42.368/32.553	10.518/31778	37.46	15894	8.691	48.159	319.27	887.45	1	0	0	0	TRUE
Tmem125_58451	Tmem125	35.306/33.603	7578.1/22577	34.455	15078	8.7323	1.4498	287.78	886.76	1	0	0	0	TRUE
Tnfsf13_34661	Tnfsf13	50.438/55.656	12148/27245	53.047	19697	8.5096	13.615	491.98	885.62	1	0	0	0	TRUE
Ott_12397	Ott	118.02/143.86	16276/52874	130.94	34575	8.0337	333.88	1518.5	883.9	1	0	0	0	TRUE
Acan_457	Acan	16.14/35.704	5.2589/25180	25.922	12593	8.8697	191.37	202.23	883.71	1	0	0	0	TRUE
control_79453	control	52.455/23.102	42.071/31778	37.779	15910	8.6806	430.79	322.64	883.66	1	0	0	0	TRUE
Cd59b_71548	Cd59b	14.123/12.601	10.518/16697	13.362	8353.8	9.1842	1.1571	89.162	883.28	1	0	0	0	TRUE
Vmn2r58_76012	Vmn2r58	23.201/7.3508	0/18133	15.276	9066.7	9.1218	125.62	105.17	882.61	1	0	0	0	TRUE
Lce1e_33262	Lce1e	0/7.3508	21.036/7540.6	3.6754	3780.8	9.6598	27.017	18.318	882.51	1	0	0	0	TRUE
Vmn1r5_51334	Vmn1r5	26.228/11.551	110.44/20557	18.889	10334	9.0213	107.7	136.7	882.23	1	0	0	0	TRUE
Tm2d2_34936	Tm2d2	26.228/35.704	2250.8/25809	30.966	14030	8.7779	44.899	252.08	881.7	1	0	0	0	TRUE
Fbxl2_38142	Fbxl2	7.0613/2.1002	21.036/8617.9	4.5807	4319.4	9.5965	12.306	23.965	881.41	1	0	0	0	TRUE
Elmod1_68598	Elmod1	12.105/17.852	15.777/17864	14.978	8939.9	9.1282	16.513	102.65	880.91	1	0	0	0	TRUE
Cacna2d3_1885	Cacna2d3	8.07/19.952	57.848/17056	14.011	8557	9.1551	70.591	94.533	878.66	1	0	0	0	TRUE
Ldlr_9756	Ldlr	2.0175/0	3439.3/0	1.0088	1719.7	9.7424	2.0352	3.8296	878.23	1	0	0	0	TRUE
Eif4e1b_55541	Eif4e1b	25.219/9.451	0/19480	17.335	9740	9.0533	124.31	122.94	876.88	1	0	0	0	TRUE
Col22a1_34856	Col22a1	36.315/28.353	52.589/28592	32.334	14322	8.7471	31.698	265.97	876.21	1	0	0	0	TRUE
Traf7_56293	Traf7	27.236/26.253	10.518/25450	26.744	12730	8.8419	0.48372	210.21	876.18	1	0	0	0	TRUE
Rint1_38860	Rint1	2.0175/5.2505	0/7450.9	3.634	3725.4	9.6513	5.2263	18.068	875.59	1	0	0	0	TRUE
Por_13422	Por	2.0175/0	3428.8/0	1.0088	1714.4	9.738	2.0352	3.8296	875.54	1	0	0	0	TRUE
Rnf112_19118	Rnf112	6.0525/15.752	10.518/14588	10.902	7299	9.2605	47.036	69.397	874.87	1	0	0	0	TRUE
Fam210b_29750	Fam210b	30.263/9.451	21.036/21096	19.857	10558	8.9838	216.56	145.41	873.96	1	0	0	0	TRUE
Nxph3_47695	Nxph3	10.088/22.052	3218.4/15306	16.07	9262.1	9.0839	71.578	111.96	873.83	1	0	0	0	TRUE
Gucy1a3_26717	Gucy1a3	15.131/14.702	0/17685	14.916	8842.3	9.1179	0.092346	102.12	873.51	1	0	0	0	TRUE
Hnrnpk_7750	Hnrnpk	423.68/296.13	14141/1.1477e+05	359.9	64456	7.4806	8133.9	5390	873.04	1	0	0	0	TRUE
Appbp2_29397	Appbp2	7.0613/7.3508	26.294/11266	7.206	5646.2	9.4266	0.041904	41.727	872.96	1	0	0	0	TRUE
Zfp563_61728	Zfp563	16.14/36.754	10.518/25180	26.447	12595	8.8422	212.46	207.31	872.95	1	0	0	0	TRUE
Ranbp17_27269	Ranbp17	196.71/116.56	34283/42012	156.63	38147	7.9189	3211.6	1899.9	871.59	1	0	0	0	TRUE
Zfp1_19063	Zfp1	25.219/14.702	4307/16787	19.96	10547	8.9751	55.307	146.34	870.2	1	0	0	0	TRUE
Pabpc2_12471	Pabpc2	200.74/194.27	1682.8/86223	197.51	43953	7.7907	20.94	2539.7	868.24	1	0	0	0	TRUE
Pcx_12663	Pcx	140.22/166.97	74729/269.31	153.59	37499	7.9223	357.8	1853.8	867.36	1	0	0	0	TRUE
Scgb2b20_74688	Scgb2b20	5.0438/4.2004	5.2589/8528.1	4.6221	4266.7	9.5681	0.3556	24.23	865.86	1	0	0	0	TRUE
Cldn14_24177	Cldn14	263.28/257.28	6726.1/97534	260.28	52130	7.6404	18.046	3589.2	865.8	1	0	0	0	TRUE
Il20ra_60889	Il20ra	82.718/65.107	68.366/47219	73.912	23644	8.3021	155.07	743.63	864.32	1	0	0	0	TRUE
Olfr866_65642	Olfr866	19.166/7.3508	0/16248	13.259	8124.1	9.1544	69.803	88.313	863.09	1	0	0	0	TRUE
Kctd2_35696	Kctd2	51.446/63.006	163.03/40082	57.226	20123	8.433	66.819	540.68	862.93	1	0	0	0	TRUE
Neu3_22134	Neu3	652.66/455.75	1.4276e+05/24417	554.2	83590	7.2342	19388	9271.7	862.35	1	0	0	0	TRUE
Cdca4_37696	Cdca4	4.035/21.002	84.142/15575	12.519	7829.6	9.178	143.94	82.279	861.79	1	0	0	0	TRUE
Eif5_55438	Eif5	8.07/4.2004	0/10099	6.1352	5049.5	9.4673	7.4868	34.26	861.65	1	0	0	0	TRUE
Slc25a53_29861	Slc25a53	41.359/133.36	45626/6598	87.361	26112	8.2071	4232.5	916.02	859.87	1	0	0	0	TRUE
Sp5_26972	Sp5	16.14/17.852	15.777/18852	16.996	9433.7	9.0342	1.4652	119.98	859.71	1	0	0	0	TRUE
Susd3_28077	Susd3	5.0438/3.1503	0/7854.8	4.097	3927.4	9.5901	1.7925	20.913	857.92	1	0	0	0	TRUE
Gm6592_75779	Gm6592	30.263/42.004	16665/13376	36.133	15021	8.6601	68.935	305.28	857.6	1	0	0	0	TRUE
Ear14_74735	Ear14	33.289/11.551	4832.9/17505	22.42	11169	8.8977	236.26	168.97	857.51	1	0	0	0	TRUE
Dusp7_60584	Dusp7	56.49/28.353	1283.2/31823	42.421	16553	8.5746	395.85	372.6	855.35	1	0	0	0	TRUE
Fam172a_33237	Fam172a	0/2.1002	3428.8/0	1.0501	1714.4	9.7086	2.2055	4.0191	854.63	1	0	0	0	TRUE
Il9r_8619	Il9r	2.0175/5.2505	0/7271.3	3.634	3635.7	9.6161	5.2263	18.068	854.47	1	0	0	0	TRUE
Ndst2_10805	Ndst2	465.03/498.8	14541/1.3703e+05	481.92	75787	7.294	570.1	7777.8	853.88	1	0	0	0	TRUE
2300009A05Rik_34477	2300009A05Rik	18.158/8.4009	21.036/16069	13.279	8044.9	9.1382	47.596	88.482	853.83	1	0	0	0	TRUE
Cd5_2458	Cd5	19.166/26.253	57.848/22353	22.709	11205	8.8846	25.109	171.67	853.48	1	0	0	0	TRUE
Elac1_50321	Elac1	87.761/35.704	15.777/41608	61.733	20812	8.3741	1355	594.19	851.26	1	0	0	0	TRUE
Epha7_5012	Epha7	17.149/17.852	36.812/18986	17.5	9511.5	9.0061	0.24715	124.39	851.26	1	0	0	0	TRUE
Olfr1453_66152	Olfr1453	47.411/74.558	2818.8/38466	60.984	20642	8.3796	368.46	585.24	850.77	1	0	0	0	TRUE
Slc35d2_35840	Slc35d2	12.105/16.802	5.2589/16877	14.453	8440.9	9.0935	11.03	98.227	850.22	1	0	0	0	TRUE
Actg2_180	Actg2	27.236/24.152	26.294/24058	25.694	12042	8.8175	4.7549	200.03	849.63	1	0	0	0	TRUE
Zfp729b_78278	Zfp729b	14.123/15.752	21.036/17191	14.937	8605.9	9.077	1.327	102.3	849.39	1	0	0	0	TRUE
Naip5_11345	Naip5	97.849/82.959	47.33/52515	90.404	26281	8.1676	110.86	955.99	847.07	1	0	0	0	TRUE
3110009E18Rik_39127	3110009E18Rik	16.14/5.2505	5.2589/13959	10.695	6982.2	9.2218	59.29	67.781	846.78	1	0	0	0	TRUE
St8sia2_15805	St8sia2	11.096/19.952	5.2589/17550	15.524	8777.6	9.0533	39.212	107.28	845.94	1	0	0	0	TRUE
Hoxa6_7791	Hoxa6	47.411/61.956	22582/15755	54.684	19168	8.4273	105.78	510.94	845.57	1	0	0	0	TRUE
Nfyc_11613	Nfyc	11.096/19.952	36.812/17505	15.524	8770.9	9.0522	39.212	107.28	845.3	1	0	0	0	TRUE
Macf1_90	Macf1	10.088/19.952	94.66/17056	15.02	8575.4	9.0644	48.655	103	843.49	1	0	0	0	TRUE
Wnt16_45774	Wnt16	4.035/5.2505	15.777/8303.7	4.6428	4159.7	9.5262	0.73876	24.362	841.83	1	0	0	0	TRUE
Popdc3_44608	Popdc3	80.7/89.259	3444.6/46725	84.98	25085	8.1887	36.629	884.97	840.37	1	0	0	0	TRUE
Olfr1219_66861	Olfr1219	8.07/48.305	6915.4/18313	28.187	12614	8.7556	809.43	224.35	840.28	1	0	0	0	TRUE
Cptp_44674	Cptp	2.0175/9.451	15.777/9425.8	5.7342	4720.8	9.4536	27.628	31.539	839.58	1	0	0	0	TRUE
Rab18_14269	Rab18	15.131/8.4009	5968.8/8707.6	11.766	7338.2	9.1672	22.649	76.229	839.14	1	0	0	0	TRUE
Tigd4_73482	Tigd4	0/0	2166.7/0	0.50438	1083.3	9.4934	0	1.671	837.66	1	0	0	0	TRUE
Olfr619_67485	Olfr619	13.114/15.752	2056.2/14543	14.433	8299.4	9.0711	3.4791	98.054	836.68	1	0	0	0	TRUE
Ldlrad1_75202	Ldlrad1	18.158/49.355	13857/14228	33.756	14043	8.6584	486.64	280.56	836.37	1	0	0	0	TRUE
Slc26a2_4506	Slc26a2	25.219/26.253	110.44/23609	25.736	11860	8.7932	0.53449	200.43	835.9	1	0	0	0	TRUE
E030018B13Rik_72720	E030018B13Rik	8.07/4.2004	3376.2/6418.5	6.1352	4897.4	9.4231	7.4868	34.26	835.65	1	0	0	0	TRUE
Tenm1_19728	Tenm1	9.0788/14.702	5416.7/9291.1	11.89	7353.9	9.1563	15.808	77.22	835.5	1	0	0	0	TRUE
Tgif2_57800	Tgif2	73.639/79.808	28277/18403	76.724	23340	8.2303	19.03	779.06	833.46	1	0	0	0	TRUE
Vps26b_33908	Vps26b	10.088/16.802	15.777/15799	13.445	7907.6	9.0967	22.54	89.843	832.84	1	0	0	0	TRUE
Hipk3_7605	Hipk3	1.0088/5.2505	31.553/6418.5	3.1296	3225	9.6095	8.9964	15.062	830.19	1	0	0	0	TRUE
Olfr160_44765	Olfr160	10.088/7.3508	42.071/12029	8.7191	6035.6	9.2787	3.7449	52.726	830	1	0	0	0	TRUE
Cdsn_73235	Cdsn	145.26/121.81	3397.2/62345	133.54	32871	7.9327	274.9	1556.2	829.87	1	0	0	0	TRUE
Fam219a_37553	Fam219a	7.0613/1.0501	5.2589/7540.6	4.0557	3772.9	9.5439	18.067	20.655	829.27	1	0	0	0	TRUE
Gm10778_78179	Gm10778	113.99/139.66	42318/21275	126.83	31797	7.9586	329.61	1459.1	829.1	1	0	0	0	TRUE
Zfp429_38900	Zfp429	10.088/8.4009	10.518/12478	9.2442	6244.2	9.2518	1.4224	56.654	828.36	1	0	0	0	TRUE
Stk11ip_37139	Stk11ip	5.0438/0	5642.8/0	2.5219	2821.4	9.6464	12.72	11.585	828.19	1	0	0	0	TRUE
Jade1_68292	Jade1	10.088/22.052	0/17550	16.07	8775	9.006	71.578	111.96	827.8	1	0	0	0	TRUE
Plekha8_59140	Plekha8	16.14/25.203	21.036/20467	20.671	10244	8.8849	41.065	152.82	827.02	1	0	0	0	TRUE
Sprr3_16633	Sprr3	128.11/171.17	2150.9/68180	149.64	35165	7.867	926.92	1794.4	826.62	1	0	0	0	TRUE
Olfr1039_64111	Olfr1039	57.499/29.403	9350.3/23116	43.451	16233	8.5126	394.69	383.87	826.31	1	0	0	0	TRUE
Enoph1_31750	Enoph1	8.07/14.702	5.2589/14139	11.386	7072	9.1575	21.988	73.207	825.21	1	0	0	0	TRUE
Arhgef11_53809	Arhgef11	48.42/94.51	29671/14543	71.465	22107	8.253	1062.1	713.07	825.18	1	0	0	0	TRUE
Olfr1138_65919	Olfr1138	27.236/8.4009	5.2589/18627	17.819	9316.2	8.9516	177.39	127.19	824.48	1	0	0	0	TRUE
Ddr2_11999	Ddr2	2.0175/0	3229/0	1.0088	1614.5	9.6514	2.0352	3.8296	824.48	1	0	0	0	TRUE
Olfr51_12226	Olfr51	2.0175/4.2004	5.2589/6373.6	3.109	3189.4	9.6008	2.3826	14.941	824.34	1	0	0	0	TRUE
Tm4sf20_27910	Tm4sf20	7.0613/4.2004	5.2589/9156.5	5.6308	4580.9	9.4325	4.0922	30.844	823.81	1	0	0	0	TRUE
Cck_2244	Cck	35.306/44.105	68.366/30522	39.705	15295	8.5537	38.704	343.2	823.47	1	0	0	0	TRUE
Cmtm6_30246	Cmtm6	37.324/22.052	31.553/25405	29.688	12718	8.6951	116.61	239.25	820.32	1	0	0	0	TRUE
Als2cr12_49164	Als2cr12	18.158/16.802	5.2589/18313	17.48	9159.1	8.9533	0.91909	124.21	820.26	1	0	0	0	TRUE
Crybb3_3534	Crybb3	5.0438/4.2004	0/8079.2	4.6221	4039.6	9.4893	0.3556	24.23	819.73	1	0	0	0	TRUE
Prss8_42870	Prss8	23.201/24.152	21.036/22038	23.677	11030	8.8041	0.45239	180.77	818.6	1	0	0	0	TRUE
Tsc22d4_44471	Tsc22d4	288.5/362.29	231.39/1.1324e+05	325.4	56738	7.4416	2722.1	4749.4	818.56	1	0	0	0	TRUE
Cdc25c_2542	Cdc25c	4.035/5.2505	5.2589/8079.2	4.6428	4042.2	9.4849	0.73876	24.362	818.03	1	0	0	0	TRUE
Bzw1_29392	Bzw1	4.035/4.2004	15.777/7495.7	4.1177	3755.8	9.5198	0.013683	21.042	817.86	1	0	0	0	TRUE
Unc79_55419	Unc79	15.131/13.651	5.2589/16158	14.391	8081.9	9.0366	1.095	97.707	816.16	1	0	0	0	TRUE
H1f0_7208	H1f0	20.175/18.902	3318.4/16203	19.538	9760.9	8.8927	0.81037	142.53	815.95	1	0	0	0	TRUE
Gprasp1_30448	Gprasp1	9.0788/8.4009	57.848/11805	8.7398	5931.3	9.2505	0.22977	52.88	814.45	1	0	0	0	TRUE
Mas1_10340	Mas1	8.07/17.852	15.777/15081	12.961	7548.5	9.0788	47.842	85.876	813.17	1	0	0	0	TRUE
Abhd15_30869	Abhd15	80.7/271.98	52.589/76528	176.34	38290	7.7544	18294	2203.6	811.93	1	0	0	0	TRUE
Olfr891_65367	Olfr891	5.0438/16.802	5.2589/13555	10.923	6780.2	9.1517	69.125	69.559	811.64	1	0	0	0	TRUE
Adgre5_20066	Adgre5	14.123/0	3092.2/7271.3	7.0613	5181.8	9.3285	99.723	40.701	811.12	1	0	0	0	TRUE
Gnas_6611	Gnas	3.0263/12.601	21.036/10997	7.8138	5508.9	9.288	45.841	46.085	810.34	1	0	0	0	TRUE
control_79253	control	18.158/10.501	5.2589/15979	14.329	7992.1	9.0263	29.311	97.188	809.24	1	0	0	0	TRUE
Zp3r_19365	Zp3r	27.236/39.904	42.071/27021	33.57	13531	8.6127	80.237	278.64	808.61	1	0	0	0	TRUE
Stt3a_8883	Stt3a	20.175/0	110.44/12747	10.088	6428.8	9.1797	203.52	63.074	808.21	1	0	0	0	TRUE
Stk36_68214	Stk36	17.149/17.852	47.33/17999	17.5	9023	8.9301	0.24715	124.39	807.46	1	0	0	0	TRUE
Sgpp2_74040	Sgpp2	55.481/46.205	63.107/34920	50.843	17492	8.3984	43.027	466.68	807.34	1	0	0	0	TRUE
Ect2l_78065	Ect2l	4.035/3.1503	0/6822.5	3.5927	3411.2	9.5372	0.39133	17.817	807.3	1	0	0	0	TRUE
Pcsk7_12647	Pcsk7	5.0438/4.2004	10.518/7944.6	4.6221	3977.6	9.4669	0.3556	24.23	807.12	1	0	0	0	TRUE
Larp4_52171	Larp4	41.359/99.76	11838/31060	70.56	21449	8.2276	1705.4	701.83	806.97	1	0	0	0	TRUE
Palm_12503	Palm	7.0613/3.1503	10.518/8438.3	5.1058	4224.4	9.4347	7.6477	27.363	806.6	1	0	0	0	TRUE
Vmn2r62_75241	Vmn2r62	21.184/38.854	10455/14722	30.019	12588	8.6648	156.12	242.56	806.36	1	0	0	0	TRUE
Fam124b_62044	Fam124b	63.551/67.207	33136/7675.3	65.379	20406	8.2641	6.6816	638.22	805.15	1	0	0	0	TRUE
Slc39a3_48439	Slc39a3	4.035/6.3006	0/8483.2	5.1678	4241.6	9.426	2.5666	27.771	803.91	1	0	0	0	TRUE
Nfix_11567	Nfix	1.0088/7.3508	0/7450.9	4.1798	3725.4	9.4907	20.111	21.429	803.87	1	0	0	0	TRUE
Dnajc5_3640	Dnajc5	1.0088/13.651	0/10503	7.3301	5251.5	9.3005	79.918	42.609	803.39	1	0	0	0	TRUE
Hcn4_71305	Hcn4	12.105/28.353	2987/16652	20.229	9819.6	8.8536	132	148.78	803.38	1	0	0	0	TRUE
Ppcdc_29213	Ppcdc	16.14/23.102	5837.4/13421	19.621	9628.9	8.8673	24.237	143.28	802.8	1	0	0	0	TRUE
Prep_13624	Prep	21.184/2.1002	63.107/13869	11.642	6966.2	9.1062	182.09	75.241	801.76	1	0	0	0	TRUE
Adam39_75109	Adam39	24.21/105.01	19915/20423	64.61	20169	8.2641	3264.4	628.88	801.69	1	0	0	0	TRUE
Zfp445_60656	Zfp445	31.271/108.16	36.812/42236	69.716	21137	8.2236	2956	691.39	801.2	1	0	0	0	TRUE
Blmh_47751	Blmh	41.359/33.603	57.848/28636	37.481	14347	8.5425	30.073	319.48	800.58	1	0	0	0	TRUE
Krtap4-6_33400	Krtap4-6	42.368/28.353	63.107/27604	35.36	13834	8.5717	98.205	297.2	800.39	1	0	0	0	TRUE
Abi3bp_70283	Abi3bp	12.105/2.1002	1819.6/8438.3	7.1026	5128.9	9.3063	50.048	40.993	799.96	1	0	0	0	TRUE
Syngr2_17000	Syngr2	36.315/35.704	9166.2/18762	36.009	13964	8.5597	0.18689	303.98	798.85	1	0	0	0	TRUE
Nacad_51910	Nacad	40.35/61.956	94.66/34651	51.153	17373	8.3799	233.42	470.23	798.8	1	0	0	0	TRUE
Prkag3_62031	Prkag3	0/2.1002	3202.7/0	1.0501	1601.3	9.6103	2.2055	4.0191	798.24	1	0	0	0	TRUE
Mtfr2_37316	Mtfr2	24.21/27.303	36.812/22622	25.756	11329	8.7261	4.7826	200.63	798.03	1	0	0	0	TRUE
Gstt2_7081	Gstt2	38.333/38.854	28750/314.19	38.593	14532	8.5199	0.13595	331.3	796.29	1	0	0	0	TRUE
Xkr5_69521	Xkr5	26.228/7.3508	10.518/17325	16.789	8668	8.9287	178.17	118.18	795.82	1	0	0	0	TRUE
Serpina5_67964	Serpina5	59.516/174.32	47.33/57901	116.92	28974	7.9409	6589.7	1318	794.87	1	0	0	0	TRUE
Fam214a_60533	Fam214a	35.306/24.152	141.99/24507	29.729	12325	8.6478	62.204	239.66	794.19	1	0	0	0	TRUE
Rpe65_14861	Rpe65	35.306/28.353	3586.6/22128	31.83	12857	8.6135	24.175	260.83	794.14	1	0	0	0	TRUE
Lce1c_39702	Lce1c	2.0175/0	3108/0	1.0088	1554	9.5964	2.0352	3.8296	793.58	1	0	0	0	TRUE
Rest_14653	Rest	5.0438/5.2505	0/8348.5	5.1471	4174.3	9.4077	0.02138	27.635	793.08	1	0	0	0	TRUE
Cpne5_61710	Cpne5	60.525/36.754	10.518/33394	48.639	16702	8.3944	282.54	441.66	792.44	1	0	0	0	TRUE
Oxct2a_26824	Oxct2a	5.0438/9.451	0/10279	7.2474	5139.3	9.2837	9.7118	42.02	791.7	1	0	0	0	TRUE
1110001J03Rik_27498	1110001J03Rik	29.254/19.952	63.107/21769	24.603	10916	8.7361	43.261	189.56	791.07	1	0	0	0	TRUE
Ndufb11_47728	Ndufb11	8.07/4.2004	15.777/9246.2	6.1352	4631	9.3425	7.4868	34.26	790.15	1	0	0	0	TRUE
Rpp40_52456	Rpp40	7.0613/11.551	21.036/11939	9.3062	5980.2	9.1808	10.08	57.122	790.02	1	0	0	0	TRUE
Zic5_27154	Zic5	4.035/8.4009	0/9336	6.2179	4668	9.3373	9.5304	34.826	789.95	1	0	0	0	TRUE
I830077J02Rik_74103	I830077J02Rik	21.184/4.2004	10.518/14453	12.692	7231.7	9.045	144.22	83.686	789.13	1	0	0	0	TRUE
Map4k1_20216	Map4k1	22.193/7.3508	15835/44.885	14.772	7939.7	8.9758	110.14	100.9	788.94	1	0	0	0	TRUE
Spopl_43195	Spopl	30.263/23.102	2329.7/20557	26.682	11443	8.6915	25.634	209.6	788.58	1	0	0	0	TRUE
Bcl2a1a_1479	Bcl2a1a	32.28/35.704	5.2589/26572	33.992	13288	8.5691	5.8606	282.99	787.91	1	0	0	0	TRUE
Flnc_33433	Flnc	22.193/16.802	18811/0	19.497	9405.5	8.8421	14.53	142.16	787.22	1	0	0	0	TRUE
P2rx1_12427	P2rx1	26.228/30.453	5979.4/17729	28.34	11854	8.6584	8.9278	225.86	786.9	1	0	0	0	TRUE
Trpc7_20652	Trpc7	104.91/37.804	35687/6373.6	71.357	21030	8.1832	2251.6	711.73	785.62	1	0	0	0	TRUE
Ptchd2_62582	Ptchd2	20.175/16.802	15.777/18133	18.488	9074.6	8.8632	5.6896	133.12	784.9	1	0	0	0	TRUE
Itga6_8790	Itga6	5.0438/6.3006	10.518/8752.5	5.6722	4381.5	9.3594	0.78989	31.122	784.39	1	0	0	0	TRUE
Ankrd29_56538	Ankrd29	10.088/15.752	14525/0	12.92	7262.5	9.0274	16.041	85.538	783.85	1	0	0	0	TRUE
Tnfsf4_18285	Tnfsf4	6.0525/4.2004	15.777/8213.9	5.1265	4114.8	9.3919	1.7151	27.499	783.7	1	0	0	0	TRUE
Mfsd7b_57150	Mfsd7b	31.271/21.002	0/22442	26.137	11221	8.6919	52.728	204.3	783.22	1	0	0	0	TRUE
Cox5b_3290	Cox5b	10.088/0	5.2589/8124.1	5.0438	4064.7	9.3938	50.879	26.958	781.89	1	0	0	0	TRUE
Cdca8_22473	Cdca8	7.0613/1.0501	10.518/7091.8	4.0557	3551.1	9.4566	18.067	20.655	780.47	1	0	0	0	TRUE
Serp2_38747	Serp2	41.359/39.904	52.589/29355	40.631	14704	8.4644	1.0581	353.17	780.25	1	0	0	0	TRUE
Gtf2ird1_25501	Gtf2ird1	16.14/10.501	10.518/14722	13.321	7366.3	9.0069	15.899	88.822	780.2	1	0	0	0	TRUE
Stoml2_28718	Stoml2	6.0525/21.002	10.518/14857	13.527	7433.7	8.9994	111.75	90.525	779.88	1	0	0	0	TRUE
Dcp2_36011	Dcp2	1050.1/973.45	85026/1.3614e+05	1011.8	110580	6.7706	2938.4	19778	779.1	1	0	0	0	TRUE
Vps33a_43642	Vps33a	3.0263/6.3006	0/7720.2	4.6635	3860.1	9.4131	5.3608	24.495	779	1	0	0	0	TRUE
Kif21a_9218	Kif21a	30.263/13.651	4007.3/16024	21.957	10016	8.7692	137.96	164.66	778.8	1	0	0	0	TRUE
Dpt_24763	Dpt	256.22/85.059	105.18/71860	170.64	35983	7.7118	14649	2114.9	778.73	1	0	0	0	TRUE
Smim19_47263	Smim19	34.298/180.62	5758.5/48071	107.46	26915	7.9552	10705	1186.2	778.36	1	0	0	0	TRUE
Nup85_74632	Nup85	0/0	2008.9/0	0.50438	1004.4	9.3845	0	1.671	776.64	1	0	0	0	TRUE
Gp9_23475	Gp9	4.035/5.2505	0/7675.3	4.6428	3837.6	9.41	0.73876	24.362	776.57	1	0	0	0	TRUE
Cyp4f14_26968	Cyp4f14	25.219/17.852	21.036/19704	21.535	9862.7	8.7738	27.136	160.76	776.18	1	0	0	0	TRUE
Idnk_42098	Idnk	8.07/10.501	15.777/11715	9.2855	5865.3	9.1557	2.955	56.966	775.89	1	0	0	0	TRUE
Tnfrsf1b_17829	Tnfrsf1b	0/9.451	0/7720.2	4.7255	3860.1	9.3974	44.66	24.893	772.72	1	0	0	0	TRUE
Sbk2_72669	Sbk2	30.263/7.3508	3234.2/14812	18.807	9023.1	8.8317	262.47	135.96	772.22	1	0	0	0	TRUE
Mad1l1_10182	Mad1l1	2.0175/0	3023.9/0	1.0088	1511.9	9.5568	2.0352	3.8296	772.08	1	0	0	0	TRUE
Cd70_17867	Cd70	10.088/1.0501	0/8528.1	5.5688	4264	9.3427	40.837	30.429	771.99	1	0	0	0	TRUE
Dram1_37106	Dram1	15.131/34.654	3854.8/17595	24.892	10725	8.6943	190.56	192.33	771.54	1	0	0	0	TRUE
Rab38_38483	Rab38	66.578/76.658	13999/27380	71.618	20689	8.1544	50.806	714.97	771.08	1	0	0	0	TRUE
Fancg_26704	Fancg	0/10.501	21.036/8169	5.2505	4095	9.356	55.136	28.315	768.58	1	0	0	0	TRUE
Prkd3_41522	Prkd3	8.07/3.1503	0/8528.1	5.6102	4264	9.3337	12.102	30.706	768.5	1	0	0	0	TRUE
Trabd_32037	Trabd	143.24/151.22	48671/15979	147.23	32325	7.7687	31.783	1758.3	767.38	1	0	0	0	TRUE
Ino80c_56563	Ino80c	18.158/13.651	47.33/16114	15.904	8080.5	8.9011	10.153	110.54	767.06	1	0	0	0	TRUE
Gpr12_6762	Gpr12	62.543/39.904	47.33/33349	51.223	16698	8.3209	256.25	471.03	767.03	1	0	0	0	TRUE
Arpp19_26495	Arpp19	13.114/7.3508	0/12298	10.232	6149.2	9.0968	16.606	64.189	766.24	1	0	0	0	TRUE
Morn4_56863	Morn4	5.0438/4.2004	10.518/7540.6	4.6221	3775.6	9.3918	0.3556	24.23	766.09	1	0	0	0	TRUE
Slc2a2_16027	Slc2a2	23.201/10.501	21.036/16697	16.851	8359.1	8.8714	80.648	118.71	765.65	1	0	0	0	TRUE
Tnrc18_59062	Tnrc18	179.56/182.72	19084/54266	181.14	36675	7.6537	4.9961	2279	764.45	1	0	0	0	TRUE
Gpr45_45638	Gpr45	35.306/43.054	31.553/28098	39.18	14065	8.4515	30.017	337.57	763.37	1	0	0	0	TRUE
Ctxn2_72416	Ctxn2	37.324/13.651	3828.5/17685	25.488	10757	8.6658	280.19	198.04	762.55	1	0	0	0	TRUE
Gabrg1_6058	Gabrg1	12.105/17.852	21.036/15440	14.978	7730.7	8.9185	16.513	102.65	761.55	1	0	0	0	TRUE
Napsa_9156	Napsa	86.753/109.21	36.812/49642	97.982	24840	7.9713	252.19	1057	761	1	0	0	0	TRUE
Ovgp1_2833	Ovgp1	48.42/63.006	26599/8303.7	55.713	17452	8.2655	106.38	522.94	760.71	1	0	0	0	TRUE
Krtap7-1_36744	Krtap7-1	6.0525/14.702	10.518/12298	10.377	6154.5	9.0796	37.403	65.308	760.28	1	0	0	0	TRUE
Amotl2_24510	Amotl2	21.184/19.952	15.777/18762	20.568	9388.8	8.7661	0.75858	151.87	760.18	1	0	0	0	TRUE
Lrfn4_56735	Lrfn4	12.105/14.702	0/14408	13.403	7204	8.9665	3.3709	89.503	760.06	1	0	0	0	TRUE
Nfasc_68185	Nfasc	78.683/45.155	3649.7/33574	61.919	18612	8.2086	562.06	596.42	759.56	1	0	0	0	TRUE
Pde7a_12720	Pde7a	12.105/2.1002	0/9740	7.1026	4870	9.2316	50.048	40.993	759.52	1	0	0	0	TRUE
Ptchd1_53284	Ptchd1	19.166/10.501	0/15306	14.834	7652.8	8.917	37.543	101.43	758.41	1	0	0	0	TRUE
Birc3_887	Birc3	23.201/24.152	5195.8/15216	23.677	10206	8.6922	0.45239	180.77	757.32	1	0	0	0	TRUE
Stard3nl_42501	Stard3nl	10.088/12.601	10.518/12927	11.344	6468.6	9.0337	3.1595	72.879	756.4	1	0	0	0	TRUE
Upk1b_18528	Upk1b	34.298/110.26	13584/27200	72.279	20392	8.1204	2885.2	723.21	755.58	1	0	0	0	TRUE
Olfr145_64772	Olfr145	1.0088/7.3508	0/7002	4.1798	3501	9.4011	20.111	21.429	755.39	1	0	0	0	TRUE
Kcnh4_71979	Kcnh4	4.035/16.802	0/12254	10.418	6126.8	9.0679	81.495	65.628	755	1	0	0	0	TRUE
Olfr684_63023	Olfr684	9.0788/16.802	0/14004	12.94	7002	8.9726	29.822	85.707	754.94	1	0	0	0	TRUE
Atp5g2_31952	Atp5g2	12.105/14.702	36.812/14273	13.403	7155.1	8.9566	3.3709	89.503	754.89	1	0	0	0	TRUE
F7_5307	F7	96.84/175.37	19631/40845	136.1	30238	7.785	3083.3	1593.7	754.03	1	0	0	0	TRUE
Pkia_13125	Pkia	264.29/227.87	1556.6/86134	246.08	43845	7.4713	663.19	3345.5	753.79	1	0	0	0	TRUE
control_79637	control	23.201/13.651	15.777/17370	18.426	8693.1	8.8059	45.6	132.57	753.4	1	0	0	0	TRUE
Mroh9_44063	Mroh9	119.03/55.656	15.777/45737	87.344	22877	8.0166	2008.3	915.8	753.06	1	0	0	0	TRUE
Olfr1494_67178	Olfr1494	23.201/30.453	6626.2/15306	26.827	10966	8.6224	26.295	211.01	753.06	1	0	0	0	TRUE
Olfr869_65637	Olfr869	47.411/63.006	10.518/34337	55.209	17174	8.2553	121.6	517.06	752.83	1	0	0	0	TRUE
40787_22516	2011-09-01	2.0175/2.1002	0/4533.4	2.0589	2266.7	9.534	0.0034207	9.0582	752.44	1	0	0	0	TRUE
1700026D08Rik_41824	1700026D08Rik	11.096/17.852	5.2589/14947	14.474	7475.9	8.9165	22.819	98.401	752.18	1	0	0	0	TRUE
I830012O16Rik_76765	I830012O16Rik	8.07/16.802	10.518/13600	12.436	6805.3	8.9846	38.121	81.609	751.94	1	0	0	0	TRUE
H3f3a_7318	H3f3a	91.796/69.307	8130.2/35234	80.552	21682	8.0547	252.88	827.83	750.79	1	0	0	0	TRUE
Tango6_68824	Tango6	1.0088/1.0501	2976.5/0	1.0294	1488.3	9.5193	0.00085518	3.9242	750.77	1	0	0	0	TRUE
Tgtp1_17576	Tgtp1	13.114/23.102	15.777/17101	18.108	8558.4	8.8072	49.886	129.75	749.76	1	0	0	0	TRUE
Gm813_70709	Gm813	0/2.1002	3002.8/0	1.0501	1501.4	9.5174	2.2055	4.0191	748.39	1	0	0	0	TRUE
Scgb1b19_74340	Scgb1b19	4.035/6.3006	31.553/7854.8	5.1678	3943.2	9.3207	2.5666	27.771	747.28	1	0	0	0	TRUE
Ms4a4b_26620	Ms4a4b	17.149/15.752	10.518/16024	16.45	8017.2	8.8439	0.97602	115.24	745.3	1	0	0	0	TRUE
Olfr786_65607	Olfr786	2.0175/0	2918.7/0	1.0088	1459.3	9.5058	2.0352	3.8296	745.21	1	0	0	0	TRUE
Grin1_6946	Grin1	289.51/322.38	120.95/99240	305.95	49680	7.3386	540.27	4396	744.69	1	0	0	0	TRUE
Olfr1154_65952	Olfr1154	16.14/8.4009	36.812/13331	12.27	6683.8	8.9765	29.947	80.274	744.62	1	0	0	0	TRUE
Wdr12_25854	Wdr12	22.193/25.203	0/20063	23.698	10032	8.6661	4.5302	180.96	743.97	1	0	0	0	TRUE
Ipo9_56989	Ipo9	4.035/13.651	0/10907	8.8432	5453.5	9.1141	46.238	53.649	743.34	1	0	0	0	TRUE
Zfp473_62954	Zfp473	0/15.752	10.518/10144	7.8758	5077.2	9.1602	124.06	46.534	743.13	1	0	0	0	TRUE
Sowahd_63366	Sowahd	5.0438/9.451	42.071/9605.3	7.2474	4823.7	9.1923	9.7118	42.02	743.01	1	0	0	0	TRUE
Pmp2_13324	Pmp2	8.07/4.2004	0/8707.6	6.1352	4353.8	9.2534	7.4868	34.26	742.79	1	0	0	0	TRUE
Gpr35_26835	Gpr35	58.508/82.959	10129/29355	70.733	19742	8.1045	298.92	703.98	741.38	1	0	0	0	TRUE
Thrsp_17622	Thrsp	23.201/26.253	5.2589/20512	24.727	10259	8.6395	4.6556	190.75	741	1	0	0	0	TRUE
Shpk_41032	Shpk	57.499/16.802	47.33/26347	37.15	13197	8.4344	828.13	315.99	740.33	1	0	0	0	TRUE
Hip1_54285	Hip1	14.123/17.852	68.366/15575	15.987	7821.7	8.8471	6.9539	111.25	740.06	1	0	0	0	TRUE
C5ar1_1835	C5ar1	2.0175/12.601	0/9650.2	7.3094	4825.1	9.1819	56.008	42.462	739.35	1	0	0	0	TRUE
Olfr385_67299	Olfr385	19.166/7.3508	0/13914	13.259	6957.1	8.9307	69.803	88.313	738.91	1	0	0	0	TRUE
Nek4_19699	Nek4	2.0175/11.551	9166.2/44.885	6.7843	4605.6	9.2089	45.446	38.753	738.74	1	0	0	0	TRUE
Inip_27773	Inip	10.088/8.4009	42.071/11087	9.2442	5564.3	9.0855	1.4224	56.654	738.03	1	0	0	0	TRUE
Vmn1r35_51305	Vmn1r35	36.315/44.105	15319/12298	40.21	13809	8.3885	30.338	348.62	737.42	1	0	0	0	TRUE
Lrrc10_60978	Lrrc10	19.166/9.451	10.518/14543	14.309	7276.6	8.893	47.194	97.015	737.31	1	0	0	0	TRUE
Arl6ip1_23393	Arl6ip1	156.36/208.97	704.69/70424	182.66	35564	7.5973	1384.2	2303	737.27	1	0	0	0	TRUE
Kcna5_9000	Kcna5	29.254/19.952	10.518/20333	24.603	10172	8.6342	43.261	189.56	737	1	0	0	0	TRUE
Olfr699_64436	Olfr699	6.0525/0	0/5610.6	3.0263	2805.3	9.445	18.316	14.458	736.97	1	0	0	0	TRUE
Hdac4_52558	Hdac4	26.228/55.656	78.883/27828	40.942	13954	8.3782	433.01	356.52	736.84	1	0	0	0	TRUE
Pbrm1_29493	Pbrm1	4.035/6.3006	10.518/7765	5.1678	3887.8	9.3003	2.5666	27.771	736.77	1	0	0	0	TRUE
Vmn2r79_75513	Vmn2r79	60.525/92.409	68.366/41114	76.467	20591	8.0543	508.31	775.82	736.53	1	0	0	0	TRUE
Morn2_71877	Morn2	74.648/116.56	9402.9/37928	95.605	23665	7.9365	878.41	1025.1	736.15	1	0	0	0	TRUE
Akr1d1_52534	Akr1d1	210.83/216.32	3392/74957	213.58	39175	7.5123	15.088	2801.2	736.14	1	0	0	0	TRUE
Fxyd7_25899	Fxyd7	287.49/192.17	4454.3/79805	239.83	42130	7.4507	4543.4	3239.3	736.01	1	0	0	0	TRUE
Epn3_37527	Epn3	10.088/11.551	0/12209	10.819	6104.3	9.0128	1.0712	68.75	734.9	1	0	0	0	TRUE
Edc3_71733	Edc3	37.324/49.355	12406/16428	43.339	14417	8.345	72.376	382.65	734.79	1	0	0	0	TRUE
Mocos_33103	Mocos	28.245/43.054	26.294/25494	35.65	12760	8.4438	109.66	300.22	734.39	1	0	0	0	TRUE
Fbxo31_42747	Fbxo31	68.595/78.758	16776/23340	73.677	20058	8.0694	51.643	740.68	734.3	1	0	0	0	TRUE
Vmn2r17_73084	Vmn2r17	4.035/1.0501	0/5027.1	2.5426	2513.5	9.4713	4.4548	11.7	734.09	1	0	0	0	TRUE
Cep295_69604	Cep295	11.096/7.3508	10.518/11042	9.2235	5526.1	9.0785	7.0144	56.498	733.96	1	0	0	0	TRUE
Fbll1_61008	Fbll1	2.0175/1.0501	3654.9/44.885	1.5338	1849.9	9.5127	0.46793	6.3443	733.83	1	0	0	0	TRUE
Dpp8_40686	Dpp8	28.245/27.303	3139.6/18627	27.774	10883	8.5633	0.4439	220.28	731.42	1	0	0	0	TRUE
Zfhx3_1162	Zfhx3	6.0525/4.2004	0/7675.3	5.1265	3837.6	9.2913	1.7151	27.499	730.84	1	0	0	0	TRUE
Adgrf1_43687	Adgrf1	19.166/18.902	5.2589/17191	19.034	8598	8.7456	0.034936	138	730.31	1	0	0	0	TRUE
Pecr_50099	Pecr	36.315/65.107	42.071/31554	50.711	15798	8.2551	414.48	465.17	730.13	1	0	0	0	TRUE
Pelp1_41498	Pelp1	33.289/17.852	7067.9/13555	25.57	10312	8.6004	119.15	198.83	729.46	1	0	0	0	TRUE
Sostdc1_27278	Sostdc1	7.0613/3.1503	5.2589/7630.4	5.1058	3817.8	9.2887	7.6477	27.363	728.87	1	0	0	0	TRUE
Cyp2f2_3894	Cyp2f2	2.0175/5.2505	5.2589/6194.1	3.634	3099.7	9.3861	5.2263	18.068	728.38	1	0	0	0	TRUE
Slc38a8_60260	Slc38a8	37.324/40.954	89.401/26706	39.139	13398	8.3829	6.5899	337.13	727.56	1	0	0	0	TRUE
Dnajb14_35971	Dnajb14	95.831/69.307	10534/32093	82.569	21313	7.9946	351.77	853.77	726.59	1	0	0	0	TRUE
Olfr20_66946	Olfr20	10.088/24.152	26.294/15979	17.12	8002.6	8.7869	98.912	121.06	725.78	1	0	0	0	TRUE
Aldh2_614	Aldh2	9.0788/3.1503	0/8483.2	6.1145	4241.6	9.22	17.573	34.118	725.12	1	0	0	0	TRUE
Asb8_44238	Asb8	689.99/521.9	26568/1.22e+05	605.94	74282	6.9353	14126	10373	723.39	1	0	0	0	TRUE
Dus2_28181	Dus2	173.51/80.858	89.401/55477	127.18	27783	7.7599	4291.7	1464.2	722.76	1	0	0	0	TRUE
Olfr571_67524	Olfr571	50.438/40.954	8167/21096	45.696	14631	8.2917	44.967	408.67	721.51	1	0	0	0	TRUE
Olfr97_65479	Olfr97	29.254/35.704	110.44/23520	32.479	11815	8.4633	20.8	267.45	720.48	1	0	0	0	TRUE
Sqle_16648	Sqle	41.359/92.409	3392/33663	66.884	18528	8.0925	1303.1	656.57	720.46	1	0	0	0	TRUE
Dgkh_72078	Dgkh	31.271/14.702	5195.8/13869	22.986	9532.6	8.6347	137.28	174.26	720.37	1	0	0	0	TRUE
Chrna1_122	Chrna1	159.38/191.12	141.99/67551	175.25	33847	7.5853	503.62	2186.6	720.07	1	0	0	0	TRUE
Nme8_39437	Nme8	27.236/17.852	18806/0	22.544	9402.9	8.6418	44.034	170.12	719.18	1	0	0	0	TRUE
Pcsk1n_21596	Pcsk1n	5.0438/14.702	57.848/11221	9.8726	5639.5	9.019	46.636	61.425	718.3	1	0	0	0	TRUE
Capza3_2038	Capza3	29.254/6.3006	99.919/16114	17.777	8106.8	8.7542	263.42	126.82	718.28	1	0	0	0	TRUE
Kcnj10_9061	Kcnj10	1469.8/1194	41598/2.0126e+05	1331.9	121430	6.5095	38027	27966	718.16	1	0	0	0	TRUE
Ttc22_58358	Ttc22	47.411/81.908	36081/44.885	64.66	18063	8.1039	595.03	629.48	717.37	1	0	0	0	TRUE
Dhcr24_41166	Dhcr24	7.0613/11.551	10770/89.769	9.3062	5430	9.0416	10.08	57.122	717.22	1	0	0	0	TRUE
Olfr902_66524	Olfr902	31.271/19.952	14010/6239	25.612	10124	8.5717	64.063	199.23	715.46	1	0	0	0	TRUE
Gtf3c6_30582	Gtf3c6	59.516/52.505	47.33/32856	56.011	16451	8.1728	24.577	526.42	714.59	1	0	0	0	TRUE
Tchp_43855	Tchp	20.175/10.501	0/14722	15.338	7361.1	8.8157	46.793	105.7	714.5	1	0	0	0	TRUE
AW549877_48237	AW549877	6.0525/32.553	0/16966	19.303	8483.2	8.7069	351.15	140.41	714.29	1	0	0	0	TRUE
Naip1_11337	Naip1	18.158/6.3006	0/12792	12.229	6396.1	8.9176	70.293	79.941	714	1	0	0	0	TRUE
Cyp27a1_47706	Cyp27a1	21.184/30.453	2887.1/17415	25.818	10151	8.5643	42.96	201.23	713.79	1	0	0	0	TRUE
Ndnl2_28857	Ndnl2	16.14/13.651	31.553/14408	14.896	7219.8	8.8274	3.0966	101.95	713.57	1	0	0	0	TRUE
Prodh2_24215	Prodh2	12.105/1.0501	15.777/8707.6	6.5776	4361.7	9.1693	61.105	37.31	713	1	0	0	0	TRUE
Prrx2_15188	Prrx2	8.07/5.2505	36.812/8752.5	6.6603	4394.7	9.1645	3.9747	37.886	712.9	1	0	0	0	TRUE
Vmn2r91_76513	Vmn2r91	5.0438/8.4009	0/8797.4	6.7223	4398.7	9.1542	5.6351	38.319	709.5	1	0	0	0	TRUE
Htr5a_8145	Htr5a	8.07/0	6436.9/0	4.035	3218.4	9.3206	32.563	20.527	709.47	1	0	0	0	TRUE
Ergic3_28169	Ergic3	274.38/357.04	20636/75900	315.71	48268	7.2518	3416	4572.7	709.12	1	0	0	0	TRUE
Ctsw_3751	Ctsw	10.088/10.501	5.2589/11401	10.294	5703	8.9802	0.085518	64.668	707.9	1	0	0	0	TRUE
Plekhb1_20915	Plekhb1	27.236/28.353	57.848/21006	27.795	10532	8.5149	0.62343	220.48	707.42	1	0	0	0	TRUE
control_79217	control	19.166/25.203	0/18313	22.184	9156.5	8.6256	18.219	166.77	707.31	1	0	0	0	TRUE
Ccdc130_31423	Ccdc130	85.744/140.71	1677.6/48879	113.23	25278	7.7899	1510.9	1266.3	707.19	1	0	0	0	TRUE
Dpp8_40685	Dpp8	9.0788/5.2505	0/9111.6	7.1647	4555.8	9.1244	7.3276	41.433	706.65	1	0	0	0	TRUE
Lin54_58880	Lin54	18.158/17.852	0/16069	18.005	8034.4	8.7239	0.046723	128.83	706.26	1	0	0	0	TRUE
Clhc1_39336	Clhc1	4.035/3.1503	5963.6/0	3.5927	2981.8	9.3431	0.39133	17.817	705.56	1	0	0	0	TRUE
Gcsh_32359	Gcsh	102.89/58.806	157.77/40665	80.849	20412	7.9623	971.81	831.65	704.99	1	0	0	0	TRUE
Zfp946_40211	Zfp946	4.035/9.451	5.2589/8752.5	6.743	4378.9	9.1438	14.666	38.463	704.97	1	0	0	0	TRUE
Olfr633_64909	Olfr633	48.42/15.752	7394/15530	32.086	11462	8.4366	533.61	263.44	704.21	1	0	0	0	TRUE
BC049635_68977	BC049635	29.254/37.804	26.294/23520	33.529	11773	8.4136	36.552	278.22	703.81	1	0	0	0	TRUE
Yipf5_30170	Yipf5	22.193/18.902	0/17370	20.547	8685.2	8.6551	5.414	151.68	703.53	1	0	0	0	TRUE
Kcng2_61841	Kcng2	85.744/144.91	57.848/50809	115.33	25434	7.7724	1750.6	1295.7	703.37	1	0	0	0	TRUE
Lce3c_46002	Lce3c	107.94/142.81	28866/24731	125.38	26799	7.7284	608.25	1438.3	703.33	1	0	0	0	TRUE
Snx19_47395	Snx19	3.0263/6.3006	5.2589/6957.1	4.6635	3481.2	9.2641	5.3608	24.495	702.44	1	0	0	0	TRUE
Tmprss11a_52037	Tmprss11a	70.613/26.253	3234.2/26302	48.433	14768	8.2229	983.9	439.33	702.28	1	0	0	0	TRUE
Klf11_52041	Klf11	81.709/27.303	3102.7/28681	54.506	15892	8.1615	1480	508.87	702.07	1	0	0	0	TRUE
Ptprg_14138	Ptprg	2.0175/1.0501	3539.2/0	1.5338	1769.6	9.4487	0.46793	6.3443	701.95	1	0	0	0	TRUE
Coq10b_31770	Coq10b	21.184/8.4009	5.2589/14139	14.792	7072	8.8069	81.701	101.08	701.95	1	0	0	0	TRUE
Atp1a2_46502	Atp1a2	10.088/111.31	5.2589/33978	60.699	16991	8.1054	5123.1	581.83	701.9	1	0	0	0	TRUE
Olfr193_64141	Olfr193	49.429/76.658	5.2589/34786	63.043	17395	8.0855	370.71	609.94	701.8	1	0	0	0	TRUE
Bak1_1410	Bak1	285.48/485.15	110.44/1.0822e+05	385.31	54164	7.1314	19935	5872.1	701.79	1	0	0	0	TRUE
Phka2_49714	Phka2	135.17/19.952	16076/23475	77.562	19776	7.9757	6637.9	789.7	700.96	1	0	0	0	TRUE
Clec14a_29331	Clec14a	51.446/42.004	2966/25854	46.725	14410	8.2382	44.576	420.15	700.72	1	0	0	0	TRUE
Fhdc1_57984	Fhdc1	17.149/39.904	63.107/21141	28.526	10602	8.4882	258.9	227.7	700.7	1	0	0	0	TRUE
Glyr1_39963	Glyr1	0/9.451	6999.6/0	4.7255	3499.8	9.2561	44.66	24.893	700.51	1	0	0	0	TRUE
Ccdc82_28252	Ccdc82	149.3/76.658	42586/7406	112.98	24996	7.7769	2638.1	1262.8	700.24	1	0	0	0	TRUE
Hnf4g_21763	Hnf4g	16.14/25.203	26.294/17325	20.671	8675.9	8.6452	41.065	152.82	700.15	1	0	0	0	TRUE
Arid3b_24639	Arid3b	37.324/19.952	6736.6/14498	28.638	10617	8.4849	150.89	228.8	700.01	1	0	0	0	TRUE
Olfr1313_64566	Olfr1313	7.0613/5.2505	5.2589/8213.9	6.1559	4109.6	9.166	1.6394	34.401	699.61	1	0	0	0	TRUE
4930502E18Rik_41323	4930502E18Rik	73.639/66.157	5.2589/36985	69.898	18495	8.0273	27.991	693.64	699.59	1	0	0	0	TRUE
Zfp280c_52632	Zfp280c	8.07/1.0501	0/6822.5	4.5601	3411.2	9.2614	24.64	23.833	697.82	1	0	0	0	TRUE
Fcrl6_77060	Fcrl6	63.551/92.409	2808.2/36671	77.98	19740	7.9654	416.4	795.01	697.32	1	0	0	0	TRUE
AI661453_56425	AI661453	76.665/69.307	28351/9515.5	72.986	18933	7.9995	27.07	732.04	697.07	1	0	0	0	TRUE
Gm12794_71452	Gm12794	17.149/15.752	5.2589/14991	16.45	7498.4	8.7474	0.97602	115.24	696.98	1	0	0	0	TRUE
Fbxw7_21954	Fbxw7	49381/47515	5.8225e+05/1.7789e+06	48448	1180600	4.6068	1741200	2640100	696.75	1	0	0	0	TRUE
Surf1_16924	Surf1	7.0613/12.601	5.2589/10907	9.8313	5456.1	8.9768	15.346	61.109	696.7	1	0	0	0	TRUE
Pcgf3_34670	Pcgf3	27.236/70.357	6373.8/23026	48.797	14700	8.2056	929.71	443.44	695.75	1	0	0	0	TRUE
Aldh1l2_54617	Aldh1l2	10.088/16.802	10.518/13196	13.445	6603.3	8.8367	22.54	89.843	695.24	1	0	0	0	TRUE
Olfr450_65238	Olfr450	17.149/14.702	10.518/14632	15.925	7321.5	8.757	2.9945	110.71	694.31	1	0	0	0	TRUE
Aspdh_32776	Aspdh	66.578/46.205	3633.9/28457	56.391	16045	8.1272	207.53	530.87	693.95	1	0	0	0	TRUE
3110057O12Rik_68286	3110057O12Rik	103.9/99.76	24475/21904	101.83	23189	7.8171	8.5745	1109.1	693.24	1	0	0	0	TRUE
Il6_8595	Il6	5.0438/7.3508	5.2589/8169	6.1973	4087.1	9.1498	2.6611	34.685	692.93	1	0	0	0	TRUE
Sp100_16414	Sp100	44.385/25.203	23581/134.65	34.794	11858	8.372	183.98	291.3	692.72	1	0	0	0	TRUE
Olfr228_65095	Olfr228	18.158/18.902	15.777/16024	18.53	8019.8	8.6819	0.27708	133.49	692.52	1	0	0	0	TRUE
Shisa8_74446	Shisa8	15.131/24.152	15.777/16607	19.642	8311.5	8.6536	40.691	143.46	692.29	1	0	0	0	TRUE
Pak3_12501	Pak3	25.219/23.102	0/18896	24.161	9448.2	8.5529	2.2396	185.35	692.22	1	0	0	0	TRUE
control_79234	control	23.201/15.752	15.777/16518	19.476	8266.7	8.6574	27.749	141.97	692.16	1	0	0	0	TRUE
Tmem236_75759	Tmem236	58.508/80.858	63.107/36446	69.683	18255	8.0128	249.78	690.98	691.8	1	0	0	0	TRUE
Zc4h2_63423	Zc4h2	52.455/17.852	5.2589/23789	35.153	11897	8.3624	598.69	295.04	690.58	1	0	0	0	TRUE
Ifne_58340	Ifne	57.499/28.353	42.071/26886	42.926	13464	8.2599	424.74	378.11	690.2	1	0	0	0	TRUE
Tmem91_69947	Tmem91	30.263/15.752	10.518/18268	23.007	9139.3	8.5726	105.28	174.46	690.19	1	0	0	0	TRUE
Olfr1417_66996	Olfr1417	49.429/66.157	32363/44.885	57.793	16204	8.1066	139.91	547.35	690.14	1	0	0	0	TRUE
Zfp235_25016	Zfp235	21.184/11.551	26.294/14767	16.367	7396.7	8.7345	46.393	114.52	689.65	1	0	0	0	TRUE
Tex30_41953	Tex30	6.0525/0	5243.1/0	3.0263	2621.6	9.3473	18.316	14.458	688.65	1	0	0	0	TRUE
Ccdc22_23777	Ccdc22	5.0438/8.4009	10.518/8528.1	6.7223	4269.3	9.1111	5.6351	38.319	688.6	1	0	0	0	TRUE
Ift80_32596	Ift80	20.175/35.704	20473/89.769	27.939	10281	8.4729	120.57	221.9	688.31	1	0	0	0	TRUE
Art1_1107	Art1	8.07/3.1503	0/7630.4	5.6102	3815.2	9.1732	12.102	30.706	687.49	1	0	0	0	TRUE
C1ra_22170	C1ra	7.0613/7.3508	5.2589/8887.2	7.206	4446.2	9.082	0.041904	41.727	687.19	1	0	0	0	TRUE
Pcdhga3_45701	Pcdhga3	52.455/45.155	0/29040	48.805	14520	8.1877	26.648	443.53	687.15	1	0	0	0	TRUE
Grb2_6871	Grb2	168.46/19.952	9629/34157	94.207	21893	7.8453	11028	1006.4	687.13	1	0	0	0	TRUE
Lrtm2_53162	Lrtm2	25.219/16.802	10.518/17191	21.01	8600.7	8.6103	35.423	155.92	687.09	1	0	0	0	TRUE
D330045A20Rik_47441	D330045A20Rik	1.0088/2.1002	3402.5/89.769	1.5545	1746.1	9.4177	0.59565	6.4478	687.05	1	0	0	0	TRUE
Fam221b_62391	Fam221b	14.123/65.107	2561.1/22936	39.615	12749	8.2942	1299.7	342.22	687	1	0	0	0	TRUE
Fkrp_62874	Fkrp	39.341/15.752	0/20333	27.546	10166	8.4764	278.24	218.04	686.62	1	0	0	0	TRUE
Sprr2k_16627	Sprr2k	297.58/373.84	6731.4/90353	335.71	48542	7.1716	2907.5	4939.2	685.93	1	0	0	0	TRUE
Fbp2_5421	Fbp2	10.088/24.152	42.071/15081	17.12	7561.7	8.7052	98.912	121.06	685.7	1	0	0	0	TRUE
Casc4_69788	Casc4	4.035/7.3508	0/7675.3	5.6929	3837.6	9.1638	5.4971	31.26	685.36	1	0	0	0	TRUE
Pydc3_77093	Pydc3	12.105/37.804	0/19076	24.954	9538	8.5217	330.22	192.92	684.9	1	0	0	0	TRUE
Zfp786_71115	Zfp786	20.175/18.902	5.2589/16383	19.538	8194.1	8.6403	0.81037	142.53	684.72	1	0	0	0	TRUE
Rec8_25285	Rec8	16.14/12.601	131.47/13421	14.371	6776	8.7843	6.2613	97.534	684.66	1	0	0	0	TRUE
Wipf2_33000	Wipf2	9.0788/9.451	2976.5/7361.1	9.2649	5168.8	8.9763	0.06927	56.81	684.54	1	0	0	0	TRUE
Prl3d3_54255	Prl3d3	29.254/7.3508	10.518/15710	18.302	7860.1	8.6698	239.87	131.47	683.92	1	0	0	0	TRUE
Myom3_62548	Myom3	16.14/13.651	3954.7/9874.6	14.896	6914.7	8.7651	3.0966	101.95	683.35	1	0	0	0	TRUE
Olfr1349_68460	Olfr1349	34.298/13.651	1598.7/16966	23.974	9282.6	8.5381	213.13	183.58	683.32	1	0	0	0	TRUE
Sf3b6_27322	Sf3b6	3.0263/12.601	0/9291.1	7.8138	4645.6	9.0422	45.841	46.085	683.17	1	0	0	0	TRUE
Ppp1r16a_39083	Ppp1r16a	9.0788/7.3508	63.107/9515.5	8.2148	4789.3	9.022	1.493	49.005	682.98	1	0	0	0	TRUE
Gmpr2_48071	Gmpr2	32.28/23.102	173.54/20108	27.691	10141	8.4655	42.115	219.46	682.67	1	0	0	0	TRUE
Lrrc46_34228	Lrrc46	12.105/16.802	0/13555	14.453	6777.6	8.7769	11.03	98.227	682.39	1	0	0	0	TRUE
Focad_58326	Focad	45.394/24.152	23292/44.885	34.773	11668	8.3496	225.6	291.08	681.87	1	0	0	0	TRUE
Gtpbp8_27352	Gtpbp8	11.096/23.102	5416.7/9605.3	17.099	7511	8.6971	72.073	120.88	681.61	1	0	0	0	TRUE
Atp4b_1250	Atp4b	12.105/26.253	10.518/16114	19.179	8062.1	8.6423	100.08	139.29	681.47	1	0	0	0	TRUE
Dnph1_72174	Dnph1	9.0788/9.451	0/10279	9.2649	5139.3	8.968	0.06927	56.81	680.63	1	0	0	0	TRUE
Ihh_8435	Ihh	3.0263/0	3402.5/0	1.5131	1701.2	9.4037	4.5791	6.2412	680.37	1	0	0	0	TRUE
Bpifa6_74917	Bpifa6	28.245/39.904	147.25/22846	34.075	11497	8.3567	67.967	283.85	680.37	1	0	0	0	TRUE
Penk_12822	Penk	91.796/88.209	68.366/42057	90.003	21063	7.8546	6.4344	950.71	680.19	1	0	0	0	TRUE
Nat9_27673	Nat9	10.088/7.3508	10.518/9874.6	8.7191	4942.6	8.9905	3.7449	52.726	679.48	1	0	0	0	TRUE
Rin3_55411	Rin3	10.088/18.902	5.2589/13510	14.495	6757.8	8.7688	38.847	98.574	679.19	1	0	0	0	TRUE
Zfp526_52980	Zfp526	17.149/7.3508	5.2589/12164	12.25	6084.5	8.8433	48.001	80.107	678.44	1	0	0	0	TRUE
Mylk_48659	Mylk	191.66/145.96	13494/48790	168.81	31142	7.5188	1044.1	2086.6	678.06	1	0	0	0	TRUE
Tbc1d23_31083	Tbc1d23	14.123/23.102	36.812/15710	18.612	7873.2	8.6492	40.319	134.23	677.96	1	0	0	0	TRUE
Iws1_39505	Iws1	14.123/0	0/8662.7	7.0613	4331.4	9.0699	99.723	40.701	677.82	1	0	0	0	TRUE
Rap2b_39938	Rap2b	9.0788/19.952	5669.1/7765	14.515	6717.1	8.7582	59.114	98.747	674.49	1	0	0	0	TRUE
Ap1ar_53267	Ap1ar	5.0438/7.3508	10.518/7944.6	6.1973	3977.6	9.1106	2.6611	34.685	674.33	1	0	0	0	TRUE
Scg5_15667	Scg5	43.376/40.954	21.036/25988	42.165	13005	8.235	2.9333	369.81	674.06	1	0	0	0	TRUE
Apol6_37641	Apol6	33.289/21.002	31.553/19749	27.145	9890.4	8.4571	75.481	214.12	674.05	1	0	0	0	TRUE
Apcdd1_74684	Apcdd1	51.446/55.656	57.848/30118	53.551	15088	8.1116	8.8595	497.81	673.83	1	0	0	0	TRUE
Tcf19_48403	Tcf19	35.306/38.854	31.553/23968	37.08	12000	8.2999	6.2931	315.25	673.77	1	0	0	0	TRUE
Gucy2c_7135	Gucy2c	3.0263/11.551	26.294/8752.5	7.2887	4389.4	9.049	36.337	42.315	673.66	1	0	0	0	TRUE
Crygn_54009	Crygn	91.796/31.503	1993.1/30926	61.65	16459	8.0375	1817.6	593.2	673.26	1	0	0	0	TRUE
Cldn23_37571	Cldn23	126.09/30.453	8004/30207	78.274	19106	7.913	4573.6	798.74	673.25	1	0	0	0	TRUE
Myh7_50836	Myh7	0/21.002	26.294/10952	10.501	5489.1	8.8989	220.55	66.27	672.99	1	0	0	0	TRUE
Krtap8-1_9576	Krtap8-1	201.75/17.852	115.7/46994	109.8	23555	7.732	16909	1218.6	671.62	1	0	0	0	TRUE
Ptpn18_14084	Ptpn18	6.0525/35.704	5.2589/16742	20.878	8373.6	8.5804	439.6	154.71	671.54	1	0	0	0	TRUE
Zmym5_55773	Zmym5	33.289/14.702	15.777/18223	23.995	9119.5	8.5113	172.74	183.78	670.93	1	0	0	0	TRUE
AI467606_47169	AI467606	10.088/1.0501	5.2589/7406	5.5688	3705.6	9.1403	40.837	30.429	670.76	1	0	0	0	TRUE
Aipl1_50258	Aipl1	6.0525/116.56	0/32676	61.307	16338	8.0347	6106.2	589.09	670.62	1	0	0	0	TRUE
Olfr871_66877	Olfr871	176.53/201.62	51874/14273	189.08	33073	7.443	314.73	2404.7	670.59	1	0	0	0	TRUE
Galnt4_6120	Galnt4	18.158/12.601	10.518/13824	15.379	6917.5	8.7224	15.436	106.05	670.24	1	0	0	0	TRUE
Gadd45g_19557	Gadd45g	129.12/95.56	3160.6/44436	112.34	23798	7.7141	563.15	1253.9	668.9	1	0	0	0	TRUE
Prkcsh_13668	Prkcsh	9.0788/12.601	3444.6/7675.3	10.84	5559.9	8.8755	6.2041	68.912	668.46	1	0	0	0	TRUE
Scarf2_56134	Scarf2	154.34/156.47	56491/1795.4	155.4	29143	7.5418	2.2623	1881.2	668.33	1	0	0	0	TRUE
Slco5a1_61928	Slco5a1	6.0525/8.4009	0/8662.7	7.2267	4331.4	9.0406	2.7574	41.873	668.24	1	0	0	0	TRUE
A130010J15Rik_69383	A130010J15Rik	20.175/14.702	5.2589/14902	17.438	7453.5	8.6593	14.98	123.84	668.2	1	0	0	0	TRUE
Postn_21919	Postn	31.271/55.656	3413/22846	43.464	13130	8.2061	297.3	384.01	667.8	1	0	0	0	TRUE
Tmem126a_27936	Tmem126a	12.105/39.904	3013.3/16069	26.005	9541	8.4649	386.39	203.03	667.78	1	0	0	0	TRUE
Zfr2_47520	Zfr2	306.66/201.62	6431.6/72893	254.14	39662	7.2804	5516.7	3483.4	667.71	1	0	0	0	TRUE
Clca4a_46717	Clca4a	22.193/19.952	120.95/16607	21.072	8364.1	8.566	2.5099	156.49	666.93	1	0	0	0	TRUE
Rnase6_44186	Rnase6	5.0438/5.2505	15.777/7002	5.1471	3508.9	9.1573	0.02138	27.635	666.51	1	0	0	0	TRUE
Abhd4_48077	Abhd4	139.21/219.47	68.366/63512	179.34	31790	7.4618	3221.2	2250.7	666.31	1	0	0	0	TRUE
Tmem97_33864	Tmem97	26.228/25.203	10.518/18896	25.715	9453.5	8.4672	0.52526	200.23	666.26	1	0	0	0	TRUE
Rtca_28178	Rtca	21.184/13.651	14662/179.54	17.418	7420.7	8.6545	28.368	123.66	665.74	1	0	0	0	TRUE
C1qtnf5_60440	C1qtnf5	323.81/218.42	15004/67372	271.12	41188	7.2419	5553.2	3777.5	665.72	1	0	0	0	TRUE
Rassf3_51893	Rassf3	2.0175/12.601	21.036/8662.7	7.3094	4341.9	9.0297	56.008	42.462	665.19	1	0	0	0	TRUE
Rnf144a_48939	Rnf144a	170.48/40.954	12521/33035	105.72	22778	7.7378	8388.3	1162.2	665.05	1	0	0	0	TRUE
Tmbim6_49784	Tmbim6	13.114/24.152	5.2589/15440	18.633	7722.8	8.6199	60.927	134.41	664.52	1	0	0	0	TRUE
Smad1_10198	Smad1	11.096/4.2004	10.518/8887.2	7.6483	4448.8	9.0071	23.776	44.89	662.86	1	0	0	0	TRUE
Nom1_74173	Nom1	3.0263/14.702	0/9740	8.8639	4870	8.9478	68.156	53.803	662.72	1	0	0	0	TRUE
Ngef_23208	Ngef	10.088/4.2004	47.33/8483.2	7.144	4265.3	9.033	17.329	41.286	662.7	1	0	0	0	TRUE
Dazap2_19797	Dazap2	24.21/26.253	10050/8483.2	25.231	9266.5	8.4647	2.0862	195.58	660.8	1	0	0	0	TRUE
Map7d1_63573	Map7d1	21.184/22.052	5.2589/16832	21.618	8418.5	8.5401	0.37714	161.52	660.7	1	0	0	0	TRUE
Fam134a_57266	Fam134a	3.0263/8.4009	0/7406	5.7136	3703	9.1078	14.443	31.4	659.81	1	0	0	0	TRUE
Usp24_70981	Usp24	123.07/168.02	3844.2/51348	145.54	27596	7.5571	1010.2	1733.1	659.38	1	0	0	0	TRUE
H2-M5_61743	H2-M5	14.123/35.704	26.294/18313	24.913	9169.6	8.4672	232.87	192.52	659.06	1	0	0	0	TRUE
Oas1e_58979	Oas1e	16.14/24.152	5.2589/16069	20.146	8037	8.5703	32.1	148.03	658.91	1	0	0	0	TRUE
Cd40lg_17865	Cd40lg	110.96/78.758	2782/39364	94.86	21073	7.7803	518.57	1015.2	658.41	1	0	0	0	TRUE
Stx7_22876	Stx7	86.753/56.706	9218.8/26168	71.729	17693	7.9265	451.4	716.36	658.38	1	0	0	0	TRUE
Gabra6_6036	Gabra6	71.621/19.952	63.107/26661	45.787	13362	8.158	1334.9	409.68	657.91	1	0	0	0	TRUE
Rbpms_14545	Rbpms	8.07/2.1002	5.2589/6867.4	5.0851	3436.3	9.1418	17.819	27.228	657.57	1	0	0	0	TRUE
Scnn1a_15336	Scnn1a	9.0788/10.501	1430.4/8842.3	9.7899	5136.3	8.8952	1.0115	60.793	657.5	1	0	0	0	TRUE
Myo1b_11260	Myo1b	10.088/2.1002	0/7675.3	6.0939	3837.6	9.0798	31.898	33.977	657.33	1	0	0	0	TRUE
Snai2_16127	Snai2	21.184/19.952	26.294/16203	20.568	8114.8	8.5557	0.75858	151.87	656.81	1	0	0	0	TRUE
Ankrd17_45108	Ankrd17	6.0525/7.3508	0/8124.1	6.7016	4062.1	9.0432	0.84272	38.174	656.36	1	0	0	0	TRUE
Atp6v1g3_71638	Atp6v1g3	8.07/7.3508	3150.1/5700.4	7.7104	4425.2	8.9891	0.25866	45.338	656.07	1	0	0	0	TRUE
Klrg2_40450	Klrg2	18.158/19.952	21.036/15440	19.055	7730.7	8.5907	1.6102	138.18	656.03	1	0	0	0	TRUE
Pank2_40797	Pank2	8.07/32.553	10.518/16069	20.312	8039.6	8.5595	299.72	149.54	655.79	1	0	0	0	TRUE
Mettl9_26518	Mettl9	111.97/147.02	5421.9/45558	129.49	25490	7.6099	614.03	1497.5	655.34	1	0	0	0	TRUE
H2-M11_56369	H2-M11	21.184/38.854	5.2589/20467	30.019	10236	8.3665	156.12	242.56	655.33	1	0	0	0	TRUE
Qrfpr_57918	Qrfpr	17.149/15.752	3733.8/10368	16.45	7051.1	8.6587	0.97602	115.24	655.31	1	0	0	0	TRUE
Prkcb_13077	Prkcb	36.315/40.954	23933/0	38.635	11967	8.2382	10.761	331.74	654.89	1	0	0	0	TRUE
Manba_49753	Manba	13.114/38.854	18701/0	25.984	9350.3	8.4369	331.28	202.83	654.72	1	0	0	0	TRUE
Acsl4_22066	Acsl4	3.0263/8.4009	7341.4/0	5.7136	3670.7	9.0952	14.443	31.4	654.05	1	0	0	0	TRUE
Aptx_28300	Aptx	38.333/15.752	3434.1/15710	27.042	9571.8	8.4152	254.95	213.11	653.83	1	0	0	0	TRUE
Asb7_50622	Asb7	8.07/5.2505	26.294/8034.4	6.6603	4030.3	9.0396	3.9747	37.886	653.71	1	0	0	0	TRUE
Dkkl1_21936	Dkkl1	7.0613/5.2505	5.2589/7675.3	6.1559	3840.3	9.0682	1.6394	34.401	653.7	1	0	0	0	TRUE
Elovl5_33456	Elovl5	86.753/59.856	3633.9/31958	73.304	17796	7.904	361.71	736.02	653.25	1	0	0	0	TRUE
Cuzd1_8895	Cuzd1	16.14/22.052	10.518/15395	19.096	7703	8.5825	17.477	138.55	652.79	1	0	0	0	TRUE
Pex12_47589	Pex12	4.035/14.702	0/9919.5	9.3683	4959.8	8.9022	56.887	57.59	652.33	1	0	0	0	TRUE
Sorcs1_26027	Sorcs1	47.411/27.303	36.812/23295	37.357	11666	8.2487	202.18	318.17	651.92	1	0	0	0	TRUE
Prr12_59685	Prr12	33.289/27.303	57.848/20423	30.296	10240	8.3542	17.916	245.34	651.84	1	0	0	0	TRUE
Pirt_51928	Pirt	46.403/76.658	14152/17685	61.53	15918	7.992	457.69	591.76	651.83	1	0	0	0	TRUE
Mad2l1bp_28714	Mad2l1bp	6.0525/4.2004	6836.6/0	5.1265	3418.3	9.1244	1.7151	27.499	650.87	1	0	0	0	TRUE
Ascl2_10348	Ascl2	9.0788/3.1503	26.294/7585.5	6.1145	3805.9	9.0636	17.573	34.118	650.53	1	0	0	0	TRUE
Nt5c2_43329	Nt5c2	38.333/13.651	3991.5/14588	25.992	9289.5	8.4271	304.58	202.9	650.33	1	0	0	0	TRUE
Cd200r4_61641	Cd200r4	25.219/15.752	0/16024	20.485	8011.9	8.5428	44.814	151.12	650.08	1	0	0	0	TRUE
Cpsf7_68172	Cpsf7	2.0175/0	2545.3/0	1.0088	1272.7	9.3085	2.0352	3.8296	649.81	1	0	0	0	TRUE
Eif2b3_48889	Eif2b3	4.035/8.4009	5.2589/7675.3	6.2179	3840.3	9.0558	9.5304	34.826	649.69	1	0	0	0	TRUE
Olfr9_12292	Olfr9	8.07/8.4009	5.2589/9111.6	8.2354	4558.4	8.9475	0.054732	49.156	648.99	1	0	0	0	TRUE
Scaf4_56240	Scaf4	21.184/60.906	5.2589/24597	41.045	12301	8.1927	788.94	357.64	648.29	1	0	0	0	TRUE
Rbm33_72534	Rbm33	16.14/5.2505	5.2589/10683	10.695	5343.9	8.8361	59.29	67.781	647.79	1	0	0	0	TRUE
Olfr1029_64379	Olfr1029	94.823/121.81	10981/34067	108.32	22524	7.6869	364.23	1198.1	647.61	1	0	0	0	TRUE
Atp2a1_1236	Atp2a1	32.28/36.754	3392/18672	34.517	11032	8.2791	10.007	288.43	647.56	1	0	0	0	TRUE
Pcnxl2_68563	Pcnxl2	2.0175/8.4009	0/6867.4	5.2092	3433.7	9.1116	20.374	28.043	647.43	1	0	0	0	TRUE
Smurf2_28043	Smurf2	21.184/17.852	15.777/15440	19.518	7728	8.5573	5.5509	142.34	646.11	1	0	0	0	TRUE
Ranbp3_37328	Ranbp3	15.131/38.854	31.553/18852	26.993	9441.6	8.398	281.38	212.63	645.64	1	0	0	0	TRUE
Cdca5_31684	Cdca5	23.201/27.303	15.777/18089	25.252	9052.1	8.4298	8.4113	195.77	645.15	1	0	0	0	TRUE
control_79227	control	39.341/42.004	15.777/24327	40.673	12172	8.1903	3.5458	353.61	645.11	1	0	0	0	TRUE
Fmo2_23989	Fmo2	17.149/17.852	15.777/14408	17.5	7211.9	8.6069	0.24715	124.39	645.06	1	0	0	0	TRUE
Olfr874_66795	Olfr874	22.193/5.2505	10.518/12388	13.722	6199.3	8.7183	143.52	92.13	644.44	1	0	0	0	TRUE
Fgf8_5569	Fgf8	18.158/37.804	2661/16607	27.981	9634.2	8.3771	192.99	222.31	644.27	1	0	0	0	TRUE
Rp1_14848	Rp1	31.271/28.353	15.777/20019	29.812	10017	8.3449	4.2585	240.49	644.03	1	0	0	0	TRUE
BC100530_77108	BC100530	16.14/26.253	6042.5/10144	21.196	8093.2	8.5104	51.133	157.63	642.92	1	0	0	0	TRUE
Xpo5_38340	Xpo5	7.0613/2.1002	5.2589/6283.9	4.5807	3144.6	9.1386	12.306	23.965	641.41	1	0	0	0	TRUE
Ikzf2_19329	Ikzf2	10.088/2.1002	126.21/7361.1	6.0939	3743.6	9.044	31.898	33.977	641.2	1	0	0	0	TRUE
Defb30_39614	Defb30	20.175/21.002	42.071/15799	20.589	7920.7	8.5194	0.34207	152.06	640.66	1	0	0	0	TRUE
Stk26_35735	Stk26	0/3.1503	3281.5/0	1.5752	1640.8	9.3164	4.9623	6.5515	640.41	1	0	0	0	TRUE
Eppin_41779	Eppin	13.114/16.802	10.518/12972	14.958	6491.1	8.6683	6.8005	102.47	639.75	1	0	0	0	TRUE
Naa16_29429	Naa16	21.184/45.155	11086/10144	33.169	10615	8.2793	287.3	274.52	638.66	1	0	0	0	TRUE
Pxt1_34248	Pxt1	110.96/29.403	3870.5/29983	70.183	16927	7.8936	3326	697.16	638.41	1	0	0	0	TRUE
Tcf15_17207	Tcf15	26.228/23.102	15.777/17640	24.665	8827.7	8.4263	4.8833	190.15	638.38	1	0	0	0	TRUE
Samd11_58698	Samd11	624.42/493.55	16203/1.0849e+05	558.98	62344	6.7988	8563	9372.4	638.21	1	0	0	0	TRUE
St3gal1_15771	St3gal1	79.691/76.658	3108/33080	78.175	18094	7.8363	4.601	797.48	637.96	1	0	0	0	TRUE
Brwd1_45866	Brwd1	457.97/556.56	5627/1.1158e+05	507.27	58605	6.8493	4859.4	8295.4	637.88	1	0	0	0	TRUE
Gm10267_77771	Gm10267	42.368/55.656	57.848/26976	49.012	13517	8.0784	88.288	445.87	637.81	1	0	0	0	TRUE
Llph_27807	Llph	7.0613/25.203	5.2589/13555	16.132	6780.2	8.6287	164.55	112.49	637.75	1	0	0	0	TRUE
Gm5415_73793	Gm5415	53.464/37.804	2455.9/23340	45.634	12898	8.1117	122.62	407.98	636.3	1	0	0	0	TRUE
BC021614_56741	BC021614	30.263/10.501	52.589/15575	20.382	7813.8	8.5137	195.26	150.17	635.96	1	0	0	0	TRUE
Hnrnpr_40566	Hnrnpr	5.0438/9.451	0/8258.8	7.2474	4129.4	8.9681	9.7118	42.02	635.91	1	0	0	0	TRUE
Shroom1_37244	Shroom1	23.201/6.3006	3276.3/9515.5	14.751	6395.9	8.6658	142.82	100.73	635.81	1	0	0	0	TRUE
Abhd4_48078	Abhd4	211.84/222.62	5122.2/63332	217.23	34227	7.2932	58.159	2861.4	635.8	1	0	0	0	TRUE
Slc6a18_18997	Slc6a18	25.219/15.752	0/15665	20.485	7832.4	8.5101	44.814	151.12	635.48	1	0	0	0	TRUE
Rhbdd1_43209	Rhbdd1	28.245/43.054	47.33/22038	35.65	11043	8.2352	109.66	300.22	635.27	1	0	0	0	TRUE
Vezf1_18715	Vezf1	118.02/103.96	2939.7/41922	110.99	22431	7.646	98.887	1235.1	635.1	1	0	0	0	TRUE
Pld1_13234	Pld1	19.166/21.002	15.777/15440	20.084	7728	8.518	1.6852	147.47	634.73	1	0	0	0	TRUE
Zfp52_19206	Zfp52	6.0525/10.501	10.518/8932	8.2768	4471.3	8.9132	9.8949	49.46	634.6	1	0	0	0	TRUE
Phf8_70186	Phf8	38.333/8.4009	26.294/16922	23.367	8473.9	8.4421	447.95	177.84	633.68	1	0	0	0	TRUE
Ssr1_48606	Ssr1	82.718/174.32	78.883/48969	128.52	24524	7.565	4195.3	1483.4	633.39	1	0	0	0	TRUE
Olfr99_65491	Olfr99	5.0438/8.4009	0/7854.8	6.7223	3927.4	8.9907	5.6351	38.319	633.37	1	0	0	0	TRUE
Phrf1_47114	Phrf1	8.07/6.3006	10.518/8169	7.1853	4089.8	8.9651	1.5653	41.58	633.13	1	0	0	0	TRUE
Ssbp4_43262	Ssbp4	35.306/36.754	6531.5/15620	36.03	11076	8.2246	1.0476	304.2	632.96	1	0	0	0	TRUE
Lrig2_68303	Lrig2	17.149/9.451	0/11939	13.3	5969.7	8.7057	29.628	88.652	632.61	1	0	0	0	TRUE
Zfp112_25835	Zfp112	49.429/34.654	36.812/24327	42.041	12182	8.145	109.15	368.45	632.46	1	0	0	0	TRUE
Dnajc19_31365	Dnajc19	30.263/24.152	18585/0	27.208	9292.5	8.364	18.666	214.72	632.29	1	0	0	0	TRUE
Cbr3_49621	Cbr3	23.201/29.403	15.777/18178	26.302	9097	8.3804	19.231	205.91	632.13	1	0	0	0	TRUE
Tgds_42620	Tgds	94.823/70.357	73.624/36985	82.59	18529	7.7923	299.28	854.04	631.22	1	0	0	0	TRUE
Tph2_54662	Tph2	17.149/3.1503	15.777/10054	10.15	5035	8.8191	97.978	63.551	630.32	1	0	0	0	TRUE
Uhmk1_9280	Uhmk1	20.175/16.802	36.812/14543	18.488	7289.7	8.5473	5.6896	133.12	630.21	1	0	0	0	TRUE
Slc32a1_18724	Slc32a1	25.219/28.353	63.107/18268	26.786	9165.6	8.3659	4.9114	210.61	629.72	1	0	0	0	TRUE
Ergic1_30804	Ergic1	42.368/58.806	99.919/27110	50.587	13605	8.043	135.11	463.76	629.42	1	0	0	0	TRUE
Olfr561_67542	Olfr561	12.105/24.152	15.777/14363	18.129	7189.4	8.5542	72.571	129.93	629.13	1	0	0	0	TRUE
Flt4_5750	Flt4	1.0088/9.451	6642/44.885	5.2299	3343.4	9.0683	35.636	28.179	628.86	1	0	0	0	TRUE
Senp5_69954	Senp5	17.149/13.651	2981.8/10009	15.4	6495.5	8.6298	6.1158	106.23	628.74	1	0	0	0	TRUE
Emc2_29067	Emc2	2.0175/4.2004	5.2589/4847.5	3.109	2426.4	9.2064	2.3826	14.941	626.93	1	0	0	0	TRUE
Dip2a_26992	Dip2a	305.65/185.87	44685/28143	245.76	36414	7.2053	7173.9	3340	625.83	1	0	0	0	TRUE
Ppp6r1_62850	Ppp6r1	1.0088/5.2505	4859.2/0	3.1296	2429.6	9.2011	8.9964	15.062	625.23	1	0	0	0	TRUE
Tram1_38238	Tram1	26.228/16.802	36.812/15844	21.515	7940.5	8.4624	44.423	160.57	624.95	1	0	0	0	TRUE
Laptm4b_50236	Laptm4b	35.306/11.551	3676/13061	23.429	8368.7	8.4205	282.15	178.43	624.76	1	0	0	0	TRUE
Olfr1239_67116	Olfr1239	30.263/34.654	68.366/20423	32.458	10245	8.2586	9.6405	267.23	624.75	1	0	0	0	TRUE
Lair1_22771	Lair1	4.035/10.501	0/8124.1	7.268	4062.1	8.9408	20.905	42.168	624.42	1	0	0	0	TRUE
Cdk2_2626	Cdk2	3.0263/4.2004	0/5296.4	3.6133	2648.2	9.1655	0.68935	17.942	624.33	1	0	0	0	TRUE
Gsx1_7010	Gsx1	97.849/75.608	63.107/37703	86.728	18883	7.7499	247.33	907.75	623.87	1	0	0	0	TRUE
Trim65_71602	Trim65	31.271/39.904	63.107/21590	35.588	10826	8.2091	37.263	299.57	623.45	1	0	0	0	TRUE
Fam49a_43160	Fam49a	29.254/25.203	3455.1/14857	27.228	9156	8.3416	8.2061	214.93	622.68	1	0	0	0	TRUE
Zfp148_19100	Zfp148	88.77/50.405	8014.5/24821	69.588	16418	7.8617	735.93	689.8	622.46	1	0	0	0	TRUE
Hspa4l_12378	Hspa4l	42.368/19.952	57.848/19839	31.16	9948.4	8.2732	251.23	254.04	622.21	1	0	0	0	TRUE
Slc26a3_4429	Slc26a3	36.315/15.752	10.518/17774	26.033	8892.4	8.3619	211.43	203.3	621.83	1	0	0	0	TRUE
Klk1b22_4745	Klk1b22	6.0525/3.1503	0/6104.3	4.6014	3052.2	9.0903	4.2113	24.097	620.82	1	0	0	0	TRUE
Krt1_9523	Krt1	17.149/0	0/8932	8.5744	4466	8.8659	147.04	51.653	620.21	1	0	0	0	TRUE
Rgcc_27790	Rgcc	13.114/19.952	10.518/13376	16.533	6693.1	8.5767	23.381	115.95	620.03	1	0	0	0	TRUE
[truncated: 77,634 more rows]
