# Supplementary material for: Reciprocal, methylation-dependent binding of Zfp57 and Gzf1 safeguards Dlk1-Dio3 imprinting during developmental reprogramming
Source: Research Square preprint supplement (doi:10.21203/rs.3.rs-7243168/v1), 2025-09-22
Supplement: Supplementary file 6 [file 753e60612af405f82260ff2c.xlsx]

## Sheet: methylation_pval
experiment	comparison	statistic	p.value	significance	n_wt	n_exp
zfp	RGM_wt vs zfp_ko	784	1.40006e-10	***	28	28
zfp	RGM_wt vs zfp_double_ko	784	1.40208e-10	***	28	28
es_TRE	V65_WT_TRE vs 15_KO_TRE	7	0.0298421	*	7	7
es_gtl2	gtl2 wt v65 vs gtl2 ko 15	7	3.3851e-05	***	13	15
embryo_CGI	emb_WT_CGI vs emb_KO_CGI	0	6.50947e-11	***	29	29
embryo_gtl2	emb_WT_gtl2 vs emb_KO_gtl2	2	2.74875e-05	***	12	14
embryo_TRE	emb_WT_TRE vs emb_KO_TRE	0	0.00216503	*	7	7
oocyte	Oocyte WT vs Oocyte Gzf1 KO_3	0	6.4616e-11	***	29	29
v65_es_panel	v65_wt vs DNMT1KO	841	6.50947e-11	***	29	29
v65_es_panel	v65_wt vs TETKO	372	0.455367	ns	29	29
v65_es_panel	v65_wt vs 15	435	2.70237e-06	***	29	0

## Sheet: qPCR_pvals
Experiment	Gene	comparison	n_g1	n_g2	estimate1	estimate2	p.value	p.adj	signif
cells	Gtl2	KO vs WT	3	4	12.9832	9.913	0.00154581	0.00309162	**
cells	Gtl2	TET_tKO vs WT	3	2	9.759	9.913	0.543383	0.543383	ns
cells	Mirg	KO vs WT	2	4	11.8852	7.1175	7.3e-06	1.46e-05	***
cells	Mirg	TET_tKO vs WT	2	2	6.579	7.1175	0.0739224	0.0739224	ns
cells	Rian	KO vs WT	3	5	11.3814	6.733	4.76e-06	9.53e-06	***
cells	Rian	TET_tKO vs WT	3	2	6.366	6.733	0.180211	0.180211	ns
Zfp57_cells	Gtl2	dKO vs WT	3	6	8.88417	10.5427	3.77e-06	3.77e-06	***
Zfp57_cells	Gtl2	KO vs WT	3	6	8.92883	10.5427	4.6e-07	9.2e-07	***
Zfp57_cells	Mirg	dKO vs WT	3	6	6.635	7.497	0.0102622	0.0102622	*
Zfp57_cells	Mirg	KO vs WT	3	6	6.559	7.497	3.19e-06	6.37e-06	***
Zfp57_cells	Rian	dKO vs WT	3	6	6.1915	7.233	0.000396	0.000396	***
Zfp57_cells	Rian	KO vs WT	3	6	5.966	7.233	2.07e-05	4.13e-05	***
Embryos	Dlk1	KO vs WT	6	6	6.7375	8.105	4.17e-05	4.17e-05	***
Embryos	Gtl2	KO vs WT	6	6	12.4225	10.4853	0.000315	0.000315	***
Embryos	Mirg	KO vs WT	6	5	11.323	9.57833	6.25e-05	6.25e-05	***
Embryos	Rian	KO vs WT	6	6	11.6802	8.73733	0.043995	0.043995	*

## Sheet: MethylationPBM
Name	1	2	3	4	5	6	7	8	9	10	11	12	13	14	15	16	17	18	19	20	21	22	23	24	25
Methylated motif	563.041	376.923	515.91	477.421	381.261	502.022	498.826	469.477	507.491	465.527	438.536	438.54	443.949	513.684	457.454	436.019	621.502	430.694	471.199	507.144	430.752	434.765	479.238	552.29	500.882
Scrambled negative control	440.869	372.042	417.206	353.655	433.403	320.95	320.139	326.8	308.36	348.409	313.886	403.378	365.221	368.664	351.147	401.374	389.222	557.67	348.339	449.108	352.786	333.493	386.9	361.937	455.095
Unmethylated motif	649.673	682.444	802.505	692.518	892.286	699.491	615.291	659.661	692.743	788.865	780.587	607.625	756.21	621.576	780.073	752.141	574.596	689.975	699.494	751.387	776.621	773.907	785.988	696.739	864.745

## Sheet: Wilcox test - Methylation
	Unmethylated motif	Methylated motif
Methylated motif	2.2e-13	-
Scrambled neg. ctrl.	4.7e-14	1.5e-07

## Sheet: SnpPBM
Name	1	2	3	4	5	6	7	8	9	10	11	12	13	14	15	16	17	18	19	20	21	22	23	24	25	26	27	28	29	30	31	32	33	34	35	36	37	38	39	40	41	42	43	44	45	46	47	48	49
129_1	410.218	420.449	487.056	387.08	514.846	492.441	448.111	423.936	487.12	391.887	479.112	503.399	439.995	437.893	451.736	379.843	379.69	402.494	463.412	405.324	390.337	541.243	364.571	445.599	394.902	399.52	432.078	416.871	398.12	401.896	428.565	467.377	480.964	411.429	365.255	424.012	406.361	416.199	406.545	428.04	460.386	463.91	387.57	403.68	549.375	521	659.192	346	400.493
129_2	510.967	412.375	408.504	356.422	369.368	331.164	378.125	496.053	350.262	421.803	340.058	354.068	371.962	394.351	545.393	480.884	457.966	380.669	371.029	345.49	366.786	371.836	405.693	350.819	395.932	377	470.97	409.605	383.664	426.463	362.368	368.585	362.95	364.433	367.545	585.404	368.954	430.37	377	499.935	439.833	345.012	364.509	361.716	562.768	379.136	589.603	328.847	458.772
cast_4	369.569	351.976	398.275	420.304	312.634	301.116	307.388	352.168	290.517	440.421	397.317	333.395	375.208	368.21	396.48	311.139	384.578	424.01	395.067	377	432.036	422.605	408.12	344.355	393.152	372.471	383.917	347.74	367.532	436.954	402.351	308.136	317.103	345.141	388.519	377	328.559	360.529	466.873	436.807	352	378.115	460.397	337.431	373.042	349.7	327.593	382	413.069
129_3	375.494	339.615	428.447	363.393	352.606	329.353	346.432	348	390.142	338.251	315.896	427.784	391.271	381.198	373.366	432.954	373.056	437	340.976	479.209	375.947	406.155	341.686	387.981	373.674	431.006	396.548	419.385	416.388	377.952	365.912	408.51	388.986	418.147	366.872	368.171	369.953	393.391	390	395.206	374.666	365.014	367.522	320.283	351.062	360.184	334.521	332.997	374.864
cast_1	446.779	394.174	470.169	500.078	481.312	439.65	450.006	467.412	374.858	405.823	375.84	470.262	416.079	557.096	535.511	421.803	456.621	472.397	404.319	484.771	488.456	390.145	378.119	391.675	440	390.295	426.21	417.567	472.042	453.815	434.121	442.515	452.084	427.562	482.19	438.072	424.273	387.833	411.059	465.177	385.173	466.403	403.276	422.866	399.115	396.278	414.7	392.08	374.024
cast_3	574.752	373.798	412.373	377.838	332.528	441.938	430.303	381.054	390.434	539.086	412.429	335.025	391.133	319.131	363.714	338.397	377	378.795	386.277	327.584	354.699	389.689	377	403.401	394.764	383.875	342.518	377	385.221	341.798	339.724	357.034	446.309	377	375.788	366.364	403.792	310.003	403.1	345.29	342.32	515.951	380.523	364.081	366.776	424.873	350	384.937	340.769
cast_2	362.85	351.686	434.624	340.97	357.869	370.347	349.738	525.07	414.7	262.884	378.792	380.359	377	351.212	369.503	327.879	392.606	346.792	485.205	358.61	387.42	377	332.382	336.449	352.389	415.582	358.244	352.104	403.607	377	377	395.149	399.585	348.344	353.162	360.455	407.739	423.565	382.928	298.799	370.519	406.884	360.935	475.582	378.933	691.704	480.371	485.96	377
129_4	405.178	350.427	419.974	312.393	378.52	410.487	374.345	356.102	386.815	305.461	329.761	342.936	347.329	454.303	424.025	410.234	374.531	377	342.144	377.952	348	434.223	414.7	408.643	384.304	383.376	382.325	397.346	344.115	374.651	338.642	466.954	376.569	389.919	425.82	361.78	354.26	354.241	408.747	471.85	410.974	335.466	378.062	377	381	347.268	377.656	371.764	350.293
[truncated: 1 more columns]

## Sheet: Wilcox test - SNVs
	129_1	cast_1	129_2	cast_2	129_3	cast_3	129_4
cast_1	1
129_2	0.0381885	0.0171354
cast_2	1.70841e-05	6.77574e-06	1
129_3	1.43974e-07	1.01139e-08	1	1
cast_3	5.13769e-06	1.30702e-06	1	1	1
129_4	3.81277e-06	4.59633e-07	1	1	1	1
cast_4	7.86314e-07	9.10458e-08	1	1	1	1	1

## Sheet: DGE p-values
	baseMean	log2FoldChange	lfcSE	stat	pvalue
Hectd3	59.6606	2.51841	0.265546	9.48392	2.44916e-21
Cd320	177.57	1.42597	0.192199	7.41922	1.1781e-13
Rab39b	10.9135	6.52166	1.13585	5.74168	9.37396e-09
Slc10a7	55.7326	1.21424	0.223739	5.42702	5.73039e-08
Mir134;Mir369;Mir382;Mir410;Mir412;Mir485;Mir668;Mirg	52.4889	3.15705	0.657326	4.80287	1.56409e-06
Dock7	60.2008	1.10525	0.236568	4.67201	2.98271e-06
Meg3;Mir1906-1;Mir770	380.202	2.26737	0.496561	4.56614	4.96776e-06
Dnajb12	53.752	1.47445	0.330998	4.45455	8.40687e-06
Rbmxl1	286.728	1.13518	0.264974	4.28412	1.83461e-05
AK207688	158.614	1.13764	0.280964	4.04907	5.14216e-05
DQ267101;Rian	11.5934	3.61649	0.968535	3.73398	0.000188476
Wdfy1	227.157	0.653025	0.192603	3.39052	0.0006976
Mep1b	25.2322	-1.20401	0.401761	-2.99682	0.00272807
Gzf1	58.6101	1.58924	0.551255	2.88294	0.00393977
Phox2a	47.9719	-1.11193	0.389797	-2.8526	0.00433633
Adh4	3.63892	2.95844	1.05538	2.80321	0.00505968
Tecrl	5.55534	4.04693	1.4864	2.72264	0.00647632
Lurap1l	24.9831	1.19698	0.442393	2.70569	0.00681623
Brsk2;Mir3104	4.67995	1.94793	0.721182	2.70102	0.00691267
Sohlh2	254.236	0.925846	0.344922	2.68421	0.00727004
Bpifb1	1.62429	3.65102	1.3755	2.65433	0.00794657
Creb3l1	97.8149	-0.651082	0.245898	-2.64777	0.00810244
Calb2	29.9069	1.06796	0.412671	2.58791	0.00965599
Malat1	665.492	-0.855116	0.334488	-2.55649	0.0105733
Car3	4.60798	-2.62429	1.03568	-2.53388	0.0112808
1700019B21Rik	24.6354	1.50923	0.599888	2.51586	0.0118742
Nos3	49.7519	-0.758248	0.301601	-2.51408	0.0119344
Sft2d3	45.6341	-0.709345	0.283308	-2.50379	0.0122871
Rasl10a	15.1189	-1.47592	0.590841	-2.498	0.0124895
Rbmxl2	1372.64	-0.391323	0.158656	-2.46648	0.0136447
Mrps5	315.276	0.537658	0.220966	2.43321	0.0149656
Gm14139	9.36589	1.27865	0.528371	2.41999	0.0155211
Abhd12;AK219995	122.85	0.530762	0.220982	2.40183	0.0163131
Sh2d4b	13.9964	1.18449	0.495348	2.39122	0.0167923
Kitl	17.2025	0.922225	0.386384	2.38681	0.0169954
Ppard	92.1144	-0.543726	0.230001	-2.36401	0.0180783
Sema4c	25.2613	-0.967134	0.410183	-2.35781	0.0183832
Ep400;Mir7026	430.749	-0.318136	0.135642	-2.34541	0.0190063
Rapsn	31.6615	0.729424	0.311341	2.34285	0.0191371
Steap2	84.8273	-0.628323	0.271473	-2.3145	0.0206405
Atp1a2	162.543	-1.01381	0.438639	-2.31126	0.0208185
Dbx2	7.86143	1.82823	0.801887	2.27991	0.0226129
Asz1	5.85602	2.60281	1.14754	2.26818	0.0233185
Figf	59.264	-0.526054	0.233576	-2.25217	0.0243114
AA467197;Mir147	91.4366	1.23726	0.549409	2.25198	0.0243236
Naa16	287.557	-0.416722	0.185197	-2.25015	0.0244391
Pan2	128.403	-0.441649	0.197484	-2.23638	0.0253269
Hsd17b3	2.70845	2.06234	0.923262	2.23375	0.0254993
Gm14169	11.0559	-1.43817	0.650788	-2.20989	0.0271125
Cdkl4	11.1687	1.40742	0.639779	2.19985	0.0278177
Rpl28	40.9686	0.641688	0.293168	2.18881	0.0286108
Csad	188.197	-0.583004	0.267032	-2.18327	0.0290158
Pde4a	51.1996	-0.567117	0.26087	-2.17394	0.0297094
Ankrd34a	5.8844	-1.69918	0.783035	-2.16999	0.0300079
Ccnt2	194.326	-0.382448	0.178136	-2.14695	0.0317974
Ddrgk1	160.435	0.449848	0.209742	2.14477	0.0319711
Ctxn1	66.9491	-0.50992	0.237963	-2.14285	0.0321252
Ccdc92b	33.8096	-0.707621	0.330331	-2.14216	0.0321807
Leng8	66.5386	-0.631776	0.295108	-2.14083	0.032288
Satb1	21.6057	-0.930218	0.435075	-2.13806	0.0325116
Peg10	1985.92	-0.569019	0.266515	-2.13504	0.0327578
Bmpr1b	5.23229	1.63877	0.768065	2.13363	0.0328731
AK054526	4.07059	-3.94387	1.85385	-2.12739	0.0333877
Ctsw	3.66303	-1.76131	0.828622	-2.12559	0.0335375
Magef1	14.0293	-1.17088	0.551249	-2.12404	0.0336666
AK158038;Mir1231;Nav1	121.933	-0.451804	0.212743	-2.1237	0.0336948
AK037871;Ube4b	402.716	-0.262286	0.124021	-2.11485	0.0344429
BC071253	272.288	-0.781547	0.369609	-2.11452	0.0344708
Ggh	94.7441	0.479498	0.227705	2.10579	0.0352228
AK048106	11.5352	-1.1158	0.532115	-2.09692	0.0360011
Rps27a	141.041	0.44575	0.212658	2.09609	0.0360743
Gpx3	377.602	-0.622376	0.297384	-2.09283	0.0363642
BC042783	6.88605	-1.43032	0.683585	-2.09237	0.0364051
Slc25a10	54.3755	0.807816	0.387026	2.08724	0.0368664
Robo4	28.7105	-1.90982	0.91606	-2.08482	0.0370856
Rps16	1011.92	0.438425	0.21074	2.0804	0.0374886
Ermp1	128.504	-0.442552	0.213156	-2.07619	0.0378765
Dock6;Mir7083	275.093	-0.360671	0.174118	-2.07142	0.03832
Cnnm2	95.8429	-0.449521	0.217075	-2.07081	0.0383768
Raph1	179.38	-0.414176	0.20073	-2.06335	0.0390798
Anpep	57.8197	-0.931026	0.453104	-2.05477	0.0399009
Btbd18	5.41794	-1.44442	0.70464	-2.04987	0.0403775
Nudt6	39.9784	-1.06997	0.527763	-2.02737	0.0426251
Fhad1	34.2168	-1.22949	0.607783	-2.02291	0.0430821
Rhbdf1	96.674	-0.499359	0.246995	-2.02174	0.0432036
Gata6	13.7494	-1.57384	0.783623	-2.00841	0.0445997
A930018P22Rik	1.91069	2.9915	1.49348	2.00305	0.0451721
Gm1673	94.6356	0.544701	0.272322	2.00021	0.0454775
Ccdc102a	41.0491	-0.65655	0.328389	-1.9993	0.0455755
Elavl3	99.3081	-0.660636	0.330832	-1.99689	0.0458369
Map4k2;Mir6989	36.3623	-0.643258	0.324269	-1.98372	0.0472874
Dapk3	200.65	0.343068	0.173091	1.98201	0.0474787
Zfp65	54.7828	0.480583	0.242578	1.98115	0.047575
Katnbl1;Slc12a6	313.807	0.320211	0.16203	1.97625	0.0481267
Enho	25.1534	-0.73411	0.373664	-1.96463	0.0494572
A930024E05Rik	11.2795	-0.884958	0.451923	-1.95821	0.0502057
Cyp2c44	21.3511	-0.894464	0.457712	-1.95421	0.0506768
Smr3a	5.72271	-1.69917	0.86972	-1.9537	0.0507372
Rhot2;Wdr90	122.968	-0.390985	0.200182	-1.95315	0.0508019
Slc22a17	37.641	-0.851959	0.436612	-1.9513	0.0510218
Uqcrh	2462.35	0.263694	0.135301	1.94895	0.0513015
AB351656	104.953	-0.426949	0.219116	-1.94851	0.0513544
Ppm1n	24.5423	-0.750629	0.385512	-1.9471	0.0515229
Diras1	1.60186	2.56434	1.31781	1.94591	0.0516656
Tex261	201.527	0.486816	0.250884	1.94041	0.0523303
Dlgap1	28.5258	-0.73982	0.381904	-1.93719	0.0527225
AK162777;Aqp11	22.1799	-0.814943	0.422039	-1.93097	0.0534872
Mfsd4b1	1.49961	2.51892	1.30458	1.93082	0.0535047
AK013187	2.12708	2.88296	1.49319	1.93074	0.0535156
Tmx1	254.965	0.372719	0.193079	1.93039	0.0535583
AK137017;Tmem5	272.334	-0.417358	0.216336	-1.92921	0.0537044
Bcl2l2	52.5908	-0.468238	0.24336	-1.92406	0.0543474
D630003M21Rik	5.3768	1.32445	0.689351	1.9213	0.0546943
Arpin	17.1313	-0.782414	0.407672	-1.91922	0.0549562
Ndufa9	855.741	0.237914	0.124151	1.91633	0.0553232
Car14	7.24278	-1.23175	0.644145	-1.91223	0.0558472
Nsg2	16.9207	-1.2847	0.671897	-1.91205	0.0558702
Paqr3	14.539	-0.764242	0.400917	-1.90623	0.0566198
Rnft2	16.2077	-0.832452	0.437168	-1.90419	0.0568853
Pdcl2	80.0446	0.869127	0.457799	1.89849	0.0576314
Gbp2	10.4925	-1.50616	0.796424	-1.89116	0.058603
Cyp27b1	1.69364	-2.48266	1.31504	-1.88789	0.05904
Tmem88	111.227	-0.439567	0.233616	-1.88158	0.0598929
Asgr1	3.53263	-1.537	0.817052	-1.88116	0.0599504
Unk	136.598	-0.35948	0.191223	-1.8799	0.0601212
AK169790;Hmbox1	76.4898	-0.447063	0.238202	-1.87682	0.0605426
Usp11	299.718	-0.354709	0.189038	-1.87639	0.0606016
Dock5	126.18	-0.409032	0.217993	-1.87635	0.0606072
Lrrc51	17.5644	-0.869948	0.465675	-1.86814	0.0617422
Scarna17	5.36002	-1.73202	0.927184	-1.86804	0.0617567
Grip2	4.66976	-1.50016	0.80328	-1.86754	0.0618259
Olfr985	27.4073	0.597869	0.320305	1.86656	0.0619633
Mfap1a	86.1736	0.455603	0.244238	1.86541	0.0621243
LOC106740	29.4866	-0.679196	0.365371	-1.85892	0.0630383
Cwh43	5.62902	-1.69146	0.91121	-1.85628	0.0634141
AK187054	7.04699	-1.16056	0.626321	-1.85298	0.0638851
A330023F24Rik;Mir29b-2;Mir29c	1.65814	2.57976	1.39281	1.8522	0.0639974
Dgkz;Mir6999	155.746	-0.338758	0.182925	-1.85189	0.0640414
Lama5;Mir7005	324.912	-0.296609	0.160175	-1.85178	0.0640577
Ckb	1225.42	0.655185	0.354332	1.84907	0.0644476
Elmod3	44.9509	0.47349	0.25608	1.849	0.0644584
Ptprc	1.89809	2.67282	1.44757	1.84642	0.0648308
Cabp4	5.11294	1.28866	0.698808	1.84408	0.0651708
Zfp870	54.1911	-0.558432	0.30302	-1.84289	0.0653449
AK033180	460.02	-0.545097	0.29599	-1.8416	0.0655333
Khnyn	37.6434	-0.87302	0.474591	-1.83952	0.0658383
AK034519;AK136882;Mir1895	21.5401	3.01949	1.64183	1.8391	0.0659011
Dnajc14	118.335	0.327491	0.178095	1.83886	0.0659363
Il18	1.34377	2.55393	1.39119	1.83579	0.0663886
Klhl15	33.593	0.656574	0.357656	1.83577	0.066392
Chmp3	453.643	0.317827	0.17326	1.83439	0.0665964
Zfp189	16.9414	0.736319	0.402109	1.83114	0.0670795
Hist1h1e	13.034	-1.0901	0.595341	-1.83105	0.0670933
Zfp354c	50.6256	-0.468779	0.256491	-1.82766	0.0676
Igsf9b	9.39298	-1.06288	0.582738	-1.82394	0.0681606
Mafb	8.47907	1.09226	0.598846	1.82394	0.0681612
Ndufaf2	328.778	0.271453	0.148834	1.82387	0.0681723
Pla2g7	70.1057	-0.793829	0.435253	-1.82384	0.068177
Epor	13.9134	-1.03689	0.568968	-1.82241	0.0683926
Smad2	227.911	-0.36647	0.201116	-1.82218	0.0684272
Ppargc1b	20.0722	-0.653334	0.35924	-1.81866	0.0689639
Trio	57.9404	0.626113	0.344394	1.81801	0.069062
Card11	9.50773	1.20162	0.661603	1.81622	0.0693363
Gm266	2.14253	-2.04589	1.1267	-1.81582	0.0693985
2310011J03Rik	116.186	0.403613	0.222351	1.81521	0.069492
Celsr1	43.4633	-0.646736	0.356795	-1.81263	0.0698896
Fgfr3	50.4684	-1.49887	0.827573	-1.81116	0.0701164
Unc13c	1.54287	-2.39731	1.32393	-1.81076	0.0701787
Hint2	177.607	0.353981	0.195636	1.80939	0.0703908
AK013935;Phactr4	107.53	-0.357577	0.198096	-1.80507	0.0710643
Tsga10ip	22.7598	-0.886951	0.493647	-1.79673	0.0723786
Tgfbr3	26.4065	-0.746411	0.415809	-1.79508	0.0726407
Ndufa5	1008.12	0.413312	0.23034	1.79435	0.0727567
Myo1g	25.0889	-1.1011	0.615494	-1.78896	0.0736211
Ttc7	20.2188	0.737028	0.41208	1.78856	0.0736861
Rftn1	14.8927	0.826735	0.46254	1.78738	0.0738761
Palm3	170.246	-0.432666	0.242092	-1.78719	0.0739061
AK159934	1.25751	-2.88618	1.61553	-1.78653	0.074014
Hrh1	4.59161	1.24095	0.694928	1.78572	0.0741449
Zbed3	63.2029	-0.569829	0.319423	-1.78393	0.074435
Cyp2s1	89.3056	-0.883577	0.496054	-1.78121	0.0748781
Zbtb7c	15.8998	-1.26567	0.711264	-1.77946	0.0751648
Ak3	59.3324	-0.532008	0.299924	-1.77381	0.0760945
Hmgn3	77.068	0.565737	0.319127	1.77276	0.0762678
Unc45b	1.55263	-2.34101	1.32087	-1.77233	0.07634
Zdhhc23	1.40312	2.34867	1.32706	1.76983	0.076756
2810029C07Rik;AK148849	3.43486	-1.50504	0.850467	-1.76966	0.0767835
Rasa2	61.3197	-0.387073	0.218741	-1.76955	0.0768015
Itgb7	125.85	-1.04217	0.5897	-1.7673	0.0771788
Olfml1	12.6301	-0.878428	0.497242	-1.7666	0.0772953
AK046689;Enpp2	5.21886	-1.54509	0.875832	-1.76414	0.0777088
Gm1123	1.73089	2.89617	1.64517	1.7604	0.0783399
Epas1	172.164	-0.574527	0.326373	-1.76034	0.0783506
Cox15	258.661	-0.272432	0.155007	-1.75755	0.0788249
Rad51b	51.9567	-0.546263	0.311337	-1.75457	0.0793324
Rpl36a	228.331	0.423467	0.241837	1.75104	0.0799389
Dnajc19	364.982	0.285253	0.162907	1.75102	0.0799426
Vrtn	9.47374	-1.04437	0.596538	-1.75072	0.0799941
Mtfp1	106.967	0.339027	0.193772	1.74962	0.0801841
Mobp	64.9125	0.721886	0.412966	1.74805	0.0804552
AK164610;Rcor3	21.3926	0.673072	0.385174	1.74745	0.0805591
Tmem56	1.19298	2.51505	1.44181	1.74437	0.0810952
2700038G22Rik	65.1339	-0.41676	0.239073	-1.74323	0.0812935
Gdnf	2.11103	1.97067	1.13202	1.74084	0.0817112
AK039065	0.969219	2.81519	1.61898	1.73886	0.0820595
Samd8	114.344	-0.378637	0.217778	-1.73864	0.0820982
Mrpl17	1534.41	0.279361	0.160778	1.73755	0.0822895
Cox19	122.789	0.334614	0.192847	1.73513	0.0827184
Blm	389.003	-0.316011	0.18226	-1.73385	0.0829453
P2rx2	9.18651	-1.00188	0.578544	-1.73173	0.0833225
Adck1	40.8281	0.48997	0.283074	1.73089	0.0834718
Cd300lf	1.24931	-3.64925	2.11002	-1.72949	0.0837222
AK156477;Hnrnph3	364.007	-0.400542	0.231624	-1.72928	0.0837589
5830454E08Rik	6.69751	-1.3471	0.780264	-1.72647	0.0842634
S100a14	8.54913	1.17048	0.67816	1.72597	0.0843534
AK018352;Etl4	230.167	-0.312083	0.181063	-1.72361	0.0847774
Gpm6b	12.5696	-0.806114	0.469288	-1.71774	0.0858444
Pck2	306.213	-0.356865	0.207795	-1.71739	0.0859077
Med24	190.141	-0.281472	0.163985	-1.71645	0.0860804
AK081861;Eya4	2.85384	-1.72275	1.00381	-1.71622	0.0861213
Chrac1	197.059	0.338215	0.197132	1.71567	0.086222
Nkx6-3	9.92232	-1.20611	0.703955	-1.71333	0.0866511
Srgap1	18.3015	0.617507	0.360461	1.7131	0.0866937
Cdc42ep2	10.6571	-0.816653	0.47708	-1.71177	0.0869384
Slx1b	258.586	0.251006	0.146785	1.71002	0.087262
Zfp516	131.661	-0.601808	0.352109	-1.70915	0.0874229
Bbs2	184.03	-0.339361	0.198588	-1.70886	0.087476
Celf4	124.802	-0.56227	0.329032	-1.70886	0.0874769
Lrtm2	3.24178	-1.73329	1.01518	-1.70738	0.087751
Ctc1	378.683	-0.405917	0.237797	-1.70699	0.0878246
AK036680;Fam126a	68.2425	-0.45238	0.26529	-1.70523	0.0881519
Gng13	13.9214	-0.892244	0.523514	-1.70433	0.0883186
Erc2	47.4287	0.572147	0.335726	1.70421	0.0883419
Jmjd8	55.1803	0.410856	0.24142	1.70183	0.0887866
Fos	325.719	-0.480059	0.282261	-1.70076	0.0889882
Gm15760	1.041	-2.55425	1.50688	-1.69506	0.0900642
Aars2	139.342	-0.39871	0.235648	-1.69197	0.0906514
Hopx	70.395	-1.43772	0.84999	-1.69145	0.0907506
Chst8	17.7288	0.77227	0.457307	1.68873	0.0912706
Fau	194.826	0.346173	0.205063	1.68813	0.0913863
Srrm3	2.67358	-1.6839	0.998446	-1.68652	0.0916948
Rps13	161.569	0.421887	0.250259	1.6858	0.0918346
Tmod4	3.08488	-2.0494	1.21578	-1.68567	0.0918602
Dab2ip	120.106	-0.408736	0.242679	-1.68427	0.09213
Urod	320.365	-0.30376	0.180414	-1.68368	0.092244
Abcb9	3.08628	-1.49922	0.89058	-1.68342	0.0922943
Mylip	48.8085	-0.4832	0.287076	-1.68318	0.0923411
Cd4	1.44953	2.27232	1.35022	1.68292	0.0923901
Lyrm7	31.5846	-0.504396	0.299802	-1.68243	0.0924854
Akr1b7	5.08156	-1.52746	0.908724	-1.68089	0.0927849
Mmp24	6.28401	1.1981	0.712822	1.68078	0.0928049
Pglyrp1	23.5301	-0.996483	0.593757	-1.67827	0.0932947
Proser2	41.2114	-0.757451	0.451386	-1.67806	0.0933361
Dnajc5g	7.87604	1.41866	0.845521	1.67786	0.093375
Plcd1	102.329	-0.573392	0.341917	-1.67699	0.093544
Itpa	391.206	0.314369	0.188097	1.67132	0.094659
Nsa2	49.9139	0.44212	0.264767	1.66985	0.0949498
Mkks	332.614	0.351085	0.210388	1.66875	0.0951676
A430005L14Rik	366.765	0.249532	0.149749	1.66634	0.0956456
Magea8	3.23044	2.78831	1.67446	1.6652	0.0958737
Prr19	28.2558	-1.1635	0.698948	-1.66464	0.095985
Aoc3	27.3388	-0.941935	0.566743	-1.66201	0.0965099
Rhox9	84.2878	0.891529	0.536426	1.66198	0.0965172
AK019420	434.259	-0.232619	0.139975	-1.66186	0.096541
Afap1l1;AK045591	31.6186	-0.575018	0.346066	-1.66158	0.0965962
Urgcp	56.2615	0.516249	0.310743	1.66134	0.0966457
Inadl	49.8465	0.602703	0.362904	1.66078	0.0967577
AK033058	1.65904	-3.30534	1.99074	-1.66035	0.0968434
Tspan13	397.281	0.228204	0.137548	1.65908	0.0970994
Irf7	2.81528	-1.90175	1.14747	-1.65734	0.0974503
Mab21l3	14.3427	-0.847353	0.511273	-1.65734	0.0974506
Spryd3	50.9535	0.383994	0.231749	1.65694	0.0975313
AK039878	15.6827	0.815407	0.492121	1.65692	0.0975351
Tgfbi	54.1153	-0.592912	0.358026	-1.65606	0.0977101
Phospho1;Zfp652	108.848	-0.525951	0.317773	-1.65512	0.097901
AK078283	1.28411	-2.87227	1.73572	-1.6548	0.0979644
Slc2a10	4.83154	1.08234	0.654398	1.65395	0.0981373
Hoxa11	1.7894	-2.06135	1.24824	-1.6514	0.0986562
AK040413;Sntb2	95.5432	-0.505457	0.30612	-1.65117	0.0987031
Gstp1	30.8896	0.712964	0.432757	1.64749	0.0994565
Kantr	28.5755	-0.624649	0.380032	-1.64367	0.100244
1600014C10Rik	51.958	0.409604	0.24935	1.64269	0.100447
Golt1b	256.835	0.396364	0.241436	1.64169	0.100654
Vamp8	246.595	0.309375	0.188588	1.64048	0.100905
Ppp1r12b	2.24005	1.66407	1.01458	1.64016	0.100973
Ush1g	1.65892	-2.58802	1.57828	-1.63977	0.101052
Brinp1	7.68838	0.977581	0.596169	1.63977	0.101053
Rmi2	83.698	-0.371212	0.226423	-1.63947	0.101116
Erh	55.5897	0.475371	0.290293	1.63756	0.101514
Hsf5	5.80136	-1.24868	0.762704	-1.63718	0.101593
Mrpl9	327.684	0.266952	0.163202	1.63571	0.1019
Ccdc169	5.59964	1.2529	0.766164	1.63529	0.101989
Cdkn3	74.323	0.534696	0.32717	1.63431	0.102194
Fsbp;Rad54b	209.824	-0.383276	0.234719	-1.63291	0.102487
Alox12	16.0439	-0.86508	0.530005	-1.63221	0.102635
Ythdf3	312.857	0.299221	0.183359	1.63188	0.102704
5830416I19Rik	45.6366	-1.15298	0.706569	-1.6318	0.102722
Stau2	72.1325	0.35881	0.219971	1.63117	0.102854
Gm11944;Patz1	299.785	0.276755	0.169711	1.63075	0.102944
Tcl1	909.811	0.266437	0.163548	1.62911	0.103291
Gast	7.54082	-1.33861	0.822433	-1.62762	0.103606
Spic	19.0248	0.640595	0.393852	1.62649	0.103846
Tef	120.179	-0.300572	0.184934	-1.62529	0.104101
Mcc	7.45949	-0.985304	0.608192	-1.62005	0.105221
Arpc5l	438.084	0.235989	0.145741	1.61923	0.105397
Pdcd7	224.144	0.280164	0.173202	1.61755	0.10576
Napsa	12.3679	-1.32188	0.817619	-1.61674	0.105934
AK157755	31.2173	-0.538936	0.333504	-1.61598	0.106098
Pla2g16	160.051	-0.523128	0.32407	-1.61424	0.106475
Gpr146	4.9056	-1.42306	0.882632	-1.61229	0.106898
Ulk4	15.4882	0.840362	0.521235	1.61225	0.106907
Rbp7	7.35286	1.41348	0.876956	1.6118	0.107006
Cystm1	492.559	-0.318734	0.197892	-1.61065	0.107256
Lgals9	112.118	-0.7161	0.444918	-1.60951	0.107505
Apmap	62.2693	0.421077	0.262077	1.60669	0.108122
Fam13a	3.00056	1.50527	0.937081	1.60634	0.108199
DQ717888	0.837786	-3.05385	1.90291	-1.60483	0.108532
Mir6970;Mir6971;Skiv2l	211.541	-0.281813	0.175631	-1.60457	0.108588
Jagn1	486.129	0.325593	0.202916	1.60457	0.10859
Map1a	55.2341	0.435279	0.271292	1.60446	0.108612
Stat5a	38.2327	0.578125	0.360374	1.60423	0.108662
Cryl1	70.9003	-0.399089	0.249277	-1.60099	0.10938
Tnfaip8l2	4.53717	-1.35009	0.844522	-1.59864	0.109901
Nars	1743.21	-0.265596	0.166162	-1.59842	0.10995
Prdm8	1.35081	-2.71552	1.6994	-1.59792	0.11006
Tnfsf12;Tnfsf13;Tnfsfm13	141.271	-0.476813	0.29843	-1.59774	0.110101
Lgi2	40.1383	0.437156	0.273718	1.5971	0.110243
Sh3gl2	95.6747	0.424831	0.266082	1.59662	0.110351
Dlc1	599.68	-0.356347	0.223204	-1.59651	0.110375
Magoh	1466.1	0.2787	0.174579	1.59641	0.110397
Kif23	639	-0.314633	0.197126	-1.5961	0.110467
Exosc3	566.939	0.246111	0.154208	1.59597	0.110495
Bex6	1.64665	-2.41768	1.51505	-1.59577	0.11054
Gm6498	3.67646	1.33102	0.834866	1.59429	0.11087
Cyp3a13	0.863544	-3.06987	1.92595	-1.59395	0.110948
Tmem183a	458.05	0.280149	0.175769	1.59385	0.11097
Ccdc88b	8.87721	-0.930889	0.584671	-1.59216	0.111349
Fam132a	118.722	-0.395063	0.248145	-1.59207	0.111369
Mphosph8	627.472	-0.227168	0.142688	-1.59205	0.111373
Mir7087;Sidt2	116.556	-0.400859	0.251949	-1.59103	0.111602
0610037L13Rik	253.938	0.286678	0.180488	1.58835	0.112206
Rnf128	108.908	-0.748582	0.471357	-1.58814	0.112254
4933430I17Rik	3.24194	1.34837	0.850004	1.58631	0.112669
Nme6	301.262	0.357476	0.225376	1.58613	0.112709
Prob1	1.63546	-2.21123	1.39475	-1.5854	0.112875
BC005561	43.8683	-0.517646	0.327015	-1.58294	0.113434
AK047187;Ppp4r1l-ps	45.9123	-0.422529	0.267012	-1.58243	0.113551
AK189432	375.637	-0.368698	0.233124	-1.58156	0.113751
Cd37	27.3198	-0.574047	0.36299	-1.58144	0.113777
Tanc1	211.858	-0.306541	0.193842	-1.5814	0.113788
AK085274	1.10477	2.36499	1.49981	1.57686	0.114828
Spata5	183.28	0.393018	0.249267	1.5767	0.114866
Fzd7	161.56	-0.3871	0.245629	-1.57595	0.115037
Hhex	37.6799	-0.460438	0.292183	-1.57586	0.115059
AK162061;Tcam1	1.35521	-2.18438	1.38725	-1.57461	0.115347
Bola2	1682.16	0.259643	0.16497	1.57388	0.115516
AK145742;Snap23	183.445	0.365356	0.232342	1.5725	0.115836
Col5a3	34.3803	-0.554743	0.353418	-1.56965	0.116497
Fam13b	25.4425	-0.685627	0.436907	-1.56928	0.116584
Def6	130.244	-0.449276	0.286321	-1.56913	0.116617
Lrp1	423.979	-0.427226	0.2725	-1.56781	0.116927
Gpatch2l	37.7222	0.462034	0.294862	1.56695	0.117126
Kcnj4	18.6497	-0.606442	0.387117	-1.56656	0.117218
Gosr2	146.233	0.438053	0.279758	1.56583	0.117389
Zfp385b	0.662751	3.02513	1.93451	1.56377	0.117872
Vnn1	2.46736	1.7821	1.14024	1.56291	0.118074
Rhcg	4.79282	1.21362	0.776609	1.56272	0.118118
Scd1	314.706	-0.369816	0.236698	-1.5624	0.118195
5730403I07Rik	1.54194	2.06772	1.3235	1.56231	0.118215
Tbx20	7.14351	-1.2196	0.780788	-1.56202	0.118284
Pcdh10	2.25858	-1.7813	1.1406	-1.56172	0.118355
Isl2	1.86229	-2.19211	1.4038	-1.56156	0.118392
Dnm2	263.841	-0.301853	0.193437	-1.56047	0.118648
Lrrc56	21.9927	-0.502923	0.32288	-1.55761	0.119325
AK135852	0.865185	2.64048	1.69604	1.55685	0.119505
Dync2h1	20.9063	-0.675487	0.434399	-1.55499	0.119948
Rpl27	179.082	0.315364	0.202906	1.55424	0.120127
Fthl17a	5.68462	1.06199	0.68337	1.55405	0.120172
Stag1	309.898	0.196275	0.126305	1.55398	0.120189
Ruvbl2	1477.2	-0.279012	0.17967	-1.55292	0.120443
Gna14	10.6073	-1.34171	0.864049	-1.55282	0.120466
Actn3	57.6449	-0.736157	0.474264	-1.55221	0.120612
Acad12	17.0108	-0.679107	0.437533	-1.55213	0.120632
Elf3	514.553	-0.690602	0.445033	-1.5518	0.12071
Dvl1	113.248	-0.29776	0.192061	-1.55034	0.121061
AK031392	6.06537	-1.09854	0.708961	-1.5495	0.121262
Ascl2	44.482	-0.796669	0.514905	-1.54722	0.121811
Gm20605;Lrch4	502.66	-0.207977	0.134422	-1.5472	0.121815
Pdzk1ip1	5.40103	1.55311	1.00498	1.54541	0.122247
Sgol2b	1.35992	2.15365	1.39407	1.54487	0.122378
St5	84.9411	-0.412077	0.266901	-1.54393	0.122605
Adgrl1	294.839	-0.427269	0.276754	-1.54386	0.122622
Bcat2	341.298	-0.196321	0.127179	-1.54366	0.122671
Cfap43;Itprip	41.833	-0.530752	0.343882	-1.54341	0.12273
Irf5	13.5534	-0.746864	0.484474	-1.5416	0.123171
Tbc1d8	33.8758	-0.460846	0.299017	-1.54121	0.123267
Hexim2	30.6551	-0.609579	0.395665	-1.54065	0.123403
Igip	19.948	-0.656699	0.426321	-1.54039	0.123466
Vip	1.21418	-2.66098	1.73097	-1.53728	0.124226
Prrx2	100.137	-0.448838	0.292017	-1.53703	0.124286
Traf3ip1	70.1995	0.378564	0.246361	1.53662	0.124385
Sumf1	81.729	0.3089	0.201063	1.53633	0.124457
Wnt7b	40.8235	0.69705	0.454442	1.53386	0.125064
1600012H06Rik	117.96	-0.3266	0.212937	-1.53378	0.125083
Snord52	2.7872	1.39195	0.907871	1.5332	0.125226
Zscan29	21.5859	0.536807	0.350196	1.53287	0.125307
F2r	181.537	-0.393305	0.256615	-1.53267	0.125357
Gabbr1	140.985	-0.683461	0.446302	-1.53139	0.125674
Dynll1	2223.72	0.218406	0.142679	1.53076	0.125829
Stx11	10.4128	1.00405	0.656207	1.53008	0.125997
Dpm2	184.987	0.29861	0.195197	1.52978	0.12607
Opcml	1.78269	-2.05399	1.34353	-1.5288	0.126314
4931428L18Rik	2.32684	1.48744	0.973055	1.52863	0.126355
Kcnab1	3.39904	1.51201	0.989691	1.52776	0.126572
Zbtb34	63.5741	-0.411878	0.269782	-1.52671	0.126833
Unc5b	117.639	-0.332832	0.218108	-1.52599	0.127012
Ifitm7	1.17062	2.30898	1.5132	1.52589	0.127037
AK132490	0.839066	2.58019	1.6913	1.52556	0.12712
Sp8	1.30211	-2.61112	1.71488	-1.52262	0.127854
Jsrp1	20.8116	-1.0062	0.660963	-1.52232	0.127928
Gm15446	7.85466	-1.10318	0.725047	-1.52153	0.128126
Dnlz	175.038	0.363688	0.239075	1.52123	0.128203
Pnp2	242.819	-0.412413	0.27112	-1.52115	0.128223
AU015228	4.15918	-1.26549	0.831982	-1.52106	0.128246
Atp5e	1524.77	0.296933	0.195245	1.52082	0.128305
Fndc3b	79.4199	0.370044	0.243471	1.51987	0.128544
Nedd4	4178.08	-0.233888	0.153966	-1.51909	0.12874
Chtop	819.721	0.319091	0.210062	1.51903	0.128755
Cd6	9.48795	0.883015	0.581395	1.51879	0.128816
Rasgef1c	6.209	1.02646	0.676648	1.51698	0.129272
Ccl27a	55.9971	0.477908	0.315049	1.51693	0.129283
Chd2	200.985	-0.38605	0.254565	-1.51651	0.129392
Nanog	3103.81	0.32344	0.213426	1.51547	0.129655
AK028705;Derl1	406.565	0.204158	0.13491	1.51329	0.130206
Cep57l1	138.768	-0.335385	0.221732	-1.51257	0.130389
Mtap7d3	16.8992	0.589597	0.390079	1.51148	0.130666
AK080982;Cyyr1	1.94518	-2.03582	1.34729	-1.51105	0.130777
Mrps25	555.611	0.30484	0.201748	1.511	0.13079
Efcab12	14.4305	0.634984	0.420334	1.51066	0.130874
Fhl4	3.80397	-1.43647	0.951139	-1.51027	0.130975
Casp4	11.7201	0.898591	0.595016	1.5102	0.130993
Nlrp3	7.71179	-1.09279	0.724022	-1.50933	0.131215
Ibtk	219.734	-0.415791	0.275553	-1.50893	0.131316
Dlk1	49.7342	0.819435	0.543182	1.50858	0.131405
Spata31d1b	10.9417	-1.04117	0.690271	-1.50834	0.131467
AK142217	3.86205	-1.26472	0.838538	-1.50824	0.131492
Gpx2-ps1	7.82658	0.959896	0.636435	1.50824	0.131493
Trim60;Trim61	2.08603	-1.67265	1.10927	-1.50789	0.131583
Mrpl30	787.078	0.250072	0.166002	1.50644	0.131954
Cpeb2	26.522	-0.537316	0.356826	-1.50582	0.132113
AK165607	2.12077	1.69497	1.12615	1.5051	0.132298
AK040904;BC096411	5.70056	-0.984459	0.654437	-1.50428	0.132508
Mpc1	12.7761	-0.73284	0.487827	-1.50225	0.133031
Gm10364	12.7014	0.674814	0.44929	1.50196	0.133108
Dppa5a	8362.09	0.413714	0.275528	1.50153	0.133219
Actn1	1100.59	-0.198221	0.13205	-1.5011	0.13333
Dnttip1	143.908	0.238924	0.159172	1.50105	0.133344
Gad2	6.46025	0.977465	0.651448	1.50045	0.133498
Pdzph1	1.19355	2.06759	1.3794	1.4989	0.133899
C1ql3	2.07926	1.51782	1.01323	1.49799	0.134135
2310057M21Rik	94.701	0.371738	0.248163	1.49796	0.134144
4831440E17Rik	11.8398	-0.719958	0.480909	-1.49708	0.134373
Klhl29	2.13497	-1.94353	1.29841	-1.49686	0.134431
Dusp26	14.3005	0.972059	0.649528	1.49656	0.134507
Ubxn11	84.7258	0.517604	0.345882	1.49647	0.13453
Eif6	883.145	0.288679	0.193006	1.4957	0.134732
Gng5	369.442	0.557724	0.372974	1.49534	0.134825
Jtb	245.41	0.29949	0.20036	1.49476	0.134977
Ppdpf	155.706	0.333743	0.223536	1.49301	0.135434
AK003349	29.7772	-0.958715	0.642261	-1.49272	0.135511
Trappc1	487.955	0.257813	0.172949	1.49069	0.136044
Myo1e	143.427	-0.368975	0.247587	-1.49029	0.136149
Pip5k1c	190.093	0.394376	0.264683	1.48999	0.136227
Btf3	211.839	0.614256	0.412377	1.48955	0.136342
Chrna5	3.8473	-1.17928	0.791706	-1.48954	0.136346
Mrps36	24.7887	0.690543	0.463674	1.48929	0.136412
Otub1	112.552	0.326188	0.219153	1.4884	0.136645
Foxr1	29.8843	-0.463861	0.311691	-1.48821	0.136697
Rps4x	1958.68	0.351371	0.236202	1.48759	0.13686
Gca	75.9083	-0.34238	0.23041	-1.48596	0.13729
Mettl7b	0.96543	2.18926	1.47362	1.48563	0.137376
1700020N01Rik	9.48528	0.80435	0.541632	1.48505	0.137531
Snora52	2.646	-1.90518	1.28355	-1.48431	0.137727
Myl3	10.2711	1.99123	1.34287	1.48281	0.138124
Gm3716	12.0492	-0.723818	0.488194	-1.48265	0.138169
Gpr89	107.528	0.338568	0.228525	1.48154	0.138464
Psmd2	855.547	0.156548	0.105693	1.48115	0.138565
2900060B14Rik	25.6576	-0.535871	0.361909	-1.48068	0.138692
Rpl12	466.068	-0.222115	0.150155	-1.47924	0.139078
Znhit6	206.47	0.380803	0.257589	1.47834	0.139317
Cst3	1744	0.475947	0.322021	1.478	0.139408
Ccdc157	18.9872	-0.723065	0.489259	-1.47788	0.13944
Prss35	13.2965	-0.905927	0.613224	-1.47732	0.13959
Gm14326	4.69555	1.31813	0.892304	1.47722	0.139617
AK181896;Zdhhc4	121.09	0.457959	0.310185	1.47641	0.139835
Bmp6	12.4673	-0.655539	0.444201	-1.47577	0.140005
Cmas	506.358	0.274265	0.185863	1.47563	0.140044
Cpne4	1.10988	-2.45431	1.66339	-1.47549	0.140081
Rem2	10.7033	0.856186	0.581308	1.47286	0.140789
Dlx5	0.746213	2.51062	1.70487	1.47262	0.140855
A630012P03Rik;BC100571	19.1912	0.783007	0.531733	1.47256	0.14087
1700052K11Rik	6.68393	0.958629	0.651224	1.47204	0.14101
Ntn5	4.67569	-1.2997	0.883504	-1.47107	0.141271
Zfp850	163.852	0.307041	0.208868	1.47003	0.141554
Prss27	6.81734	-1.20151	0.817357	-1.46999	0.141565
BC027545;BC075671	30.9442	0.437293	0.297506	1.46986	0.141599
Tmem62	13.291	0.73552	0.500415	1.46982	0.141611
Rusc1	36.3798	0.436741	0.297445	1.46831	0.142021
Slc7a7	436.807	-0.228535	0.155694	-1.46785	0.142146
Cryge	14.2338	0.823944	0.561388	1.46769	0.142189
AK163891;Msi2	211.722	-0.35519	0.242188	-1.46659	0.142488
Cyp4f39	23.318	-0.740697	0.505052	-1.46658	0.142491
Msrb2	67.3359	0.433696	0.295735	1.4665	0.142512
Commd2	382.245	0.25727	0.175561	1.46542	0.142806
AK049621	1.00902	-2.47512	1.69004	-1.46453	0.143048
Sorcs1	1.46244	-2.17682	1.48669	-1.4642	0.143138
Plxna2	13.3413	0.683527	0.46685	1.46412	0.14316
AK007605;Ggps1	155.653	0.216135	0.147631	1.46403	0.143186
Zan	4.95911	-1.19073	0.813488	-1.46374	0.143265
Ccdc136	95.6875	-0.316866	0.216649	-1.46258	0.143583
Spata1	5.89221	-0.888506	0.607671	-1.46215	0.1437
Mettl4	45.4577	-0.39271	0.268654	-1.46177	0.143805
Zfp939	3.25195	1.27371	0.871387	1.46171	0.143822
Myl6	229.96	0.57726	0.395188	1.46072	0.144092
Aptx	74.8642	0.460319	0.315212	1.46035	0.144194
BC044868	3.25538	-1.86993	1.28091	-1.45985	0.144332
Dpep2	1.64214	-2.26109	1.54946	-1.45928	0.144489
A430033K04Rik	21.5511	-0.544503	0.37331	-1.45858	0.14468
Fzr1	484.711	0.213287	0.146249	1.45838	0.144736
Snhg20	370.934	-0.605062	0.415018	-1.45792	0.144863
Zfp282	40.9466	0.577717	0.396573	1.45677	0.145179
Yeats2	127.691	-0.265203	0.182061	-1.45667	0.145208
Slc41a2	2.58607	-1.40739	0.966389	-1.45633	0.1453
Dpyd	2.18145	1.54449	1.06101	1.45568	0.145481
Fam206a	52.5319	0.467398	0.321123	1.45551	0.145527
Morf4l2	852.324	0.389638	0.267712	1.45544	0.145548
Gm6634	1.22003	-1.99167	1.36849	-1.45538	0.145563
Arhgef15	19.4798	-0.865487	0.595031	-1.45452	0.145801
Smc3	809.71	-0.244623	0.168408	-1.45256	0.146345
Zp2	1.84292	2.38328	1.64101	1.45233	0.14641
Tgfbrap1	40.6445	0.448573	0.309197	1.45077	0.146844
Oas1a	8.85124	0.797329	0.549629	1.45067	0.146872
Paqr7	13.431	-0.582942	0.401856	-1.45063	0.146884
A430046D13Rik	4.407	1.12731	0.777165	1.45054	0.146909
Samd9l	10.6164	-0.936497	0.64587	-1.44998	0.147065
Nacad	5.64933	1.13108	0.780907	1.44842	0.147498
Adam2	1.69068	-2.12504	1.46838	-1.4472	0.14784
Ivns1abp	514.37	-0.432666	0.299138	-1.44637	0.148072
Vpreb1	29.8119	0.585332	0.404821	1.4459	0.148204
Tubb2b	1047.3	0.463413	0.320583	1.44553	0.148309
Lrat	1.37655	2.39288	1.65558	1.44535	0.14836
Cerkl;Neurod1	16.4325	-0.98934	0.684789	-1.44474	0.148532
AK007436	1.25805	-1.96519	1.36067	-1.44428	0.14866
Srp54a	2.61011	-1.41002	0.976699	-1.44366	0.148836
Fam83b	0.608632	2.87217	1.99173	1.44205	0.149289
Nid1	454.892	-0.271224	0.188095	-1.44195	0.149316
Dennd2c	193.496	-0.211255	0.146548	-1.44155	0.14943
Rcbtb1	227.829	-0.284537	0.197397	-1.44145	0.149459
Hist1h2bj	52.3175	0.538387	0.373754	1.44048	0.14973
Dnaaf2;Rpl36al	1852.95	0.176868	0.12288	1.43935	0.15005
Ncbp2	583.833	-0.209191	0.145394	-1.43879	0.15021
Sytl2	3.09558	-1.32458	0.921026	-1.43816	0.150388
Tmem167b	65.7315	0.395896	0.275319	1.43795	0.150447
Ccl4	1.60593	1.90247	1.32305	1.43795	0.150449
Fam65b	3.32946	1.51378	1.05293	1.43767	0.150526
Lrrc3	7.75268	0.835527	0.581233	1.43751	0.150574
Lexm	12.2771	0.976134	0.679106	1.43738	0.15061
Map1lc3a	345.28	0.413859	0.287959	1.43722	0.150657
Mrps26	476.803	0.345466	0.240397	1.43706	0.1507
Car2	126.326	-0.602176	0.419093	-1.43686	0.150759
Trim46	14.3213	-0.85365	0.594141	-1.43678	0.15078
Vamp5	13.5827	0.743518	0.51804	1.43525	0.151216
AK029170;Stard9	10.6971	-0.944622	0.658388	-1.43475	0.151359
Map3k12	73.9388	-0.398561	0.277845	-1.43448	0.151437
Zfp133-ps	5.67794	-0.957303	0.668282	-1.43248	0.152006
Itgb3	14.9114	-0.630353	0.440092	-1.43232	0.152051
Gskip	100.963	-0.296063	0.206728	-1.43214	0.152105
Bahd1	57.389	0.533304	0.372464	1.43183	0.152194
AK016085	2.71324	-1.71743	1.19996	-1.43124	0.15236
BC025920	3.78746	-1.29388	0.904145	-1.43105	0.152415
Plekhb1	53.6705	-0.486772	0.340195	-1.43086	0.15247
AK079958	1.7811	1.83508	1.2826	1.43075	0.152502
AK215788;Sox10	8.78704	-0.909136	0.635685	-1.43017	0.152669
Slc26a2	34.8009	-0.616734	0.431436	-1.42949	0.152863
Ebag9	67.3447	0.448195	0.313607	1.42916	0.152958
Rgmb	29.985	-0.486398	0.340376	-1.429	0.153004
Pdpr	2.53352	-1.85819	1.30043	-1.42891	0.153032
Ppt2	152.467	-0.251778	0.176241	-1.4286	0.153118
AK168778	8.27191	0.839524	0.587678	1.42854	0.153135
Cyp2e1	1.25452	3.16808	2.21862	1.42795	0.153306
AK084157;Kcmf1	1111.86	0.273428	0.191487	1.42792	0.153315
Znrd1as	96.1617	-0.322355	0.225765	-1.42783	0.15334
Sowahb	8.14186	-0.848553	0.594314	-1.42778	0.153354
St7l	35.7567	0.379572	0.265867	1.42767	0.153386
Cfap100	3.25836	1.41571	0.991934	1.42722	0.153517
Sh3d19	105.698	-0.311169	0.218037	-1.42714	0.15354
Col6a5	8.4431	-0.938056	0.657319	-1.4271	0.153552
Krt71	2.10543	1.4163	0.992572	1.4269	0.153609
Ttc39aos1	0.959114	-2.29214	1.60691	-1.42642	0.153746
Hoxd8	3.81373	1.08369	0.760123	1.42568	0.153961
Ptpn20	5.29791	1.01815	0.714174	1.42564	0.153973
Cd2ap	363.015	-0.274282	0.19244	-1.42529	0.154075
Pld6	34.4194	-0.531937	0.37334	-1.4248	0.154214
Psph	696.81	-0.401452	0.281886	-1.42416	0.1544
Bpifb4	6.5485	0.961938	0.675945	1.4231	0.154707
Snora65	72.2859	0.581433	0.409004	1.42158	0.155147
Lime1;Zgpat	88.0733	0.40808	0.287077	1.4215	0.155171
Arhgap27	57.8376	-0.466457	0.328192	-1.4213	0.155231
Ift88	62.2874	-0.454576	0.319936	-1.42084	0.155365
Drd4	1.39707	-2.12539	1.49664	-1.4201	0.155578
Ntsr1	0.703376	-2.77763	1.95619	-1.41992	0.155631
Brd8	348.847	-0.286588	0.202	-1.41875	0.155971
Trmt10b	105.097	0.262377	0.184949	1.41865	0.156003
Rpl7	396.653	0.290827	0.205033	1.41844	0.156064
Rad50	299.815	-0.418684	0.295219	-1.41821	0.156128
9530082P21Rik	2.12558	-1.58561	1.11842	-1.41772	0.156271
AK008288;Ctnna1	1610.02	-0.247568	0.174625	-1.41771	0.156276
Rpl24	22.6137	0.462647	0.326404	1.41741	0.156364
BC026600	1.79982	-1.9241	1.3575	-1.41739	0.15637
Aagab	291.462	0.237206	0.167363	1.41731	0.156391
Rangrf	47.7882	0.682384	0.481621	1.41685	0.156527
Pvr	267.196	-0.519828	0.366927	-1.41671	0.156569
Fhod3	72.2517	-0.342496	0.241785	-1.41653	0.15662
AK039090	1.55585	2.7546	1.94582	1.41565	0.156878
Gm15217	1.10214	2.20152	1.55528	1.41551	0.156919
C330018D20Rik	74.9211	0.499413	0.352826	1.41546	0.156932
Ube2s	23.8547	0.505983	0.357686	1.4146	0.157185
Dapk1	85.0188	-0.449827	0.318036	-1.41439	0.157247
Gmeb1	140.389	-0.242728	0.171624	-1.4143	0.157273
Upk3a	0.957056	-2.43547	1.72215	-1.41421	0.157301
AK138921	2.00681	-1.7847	1.26228	-1.41387	0.157399
Rgs7	0.900535	2.64144	1.86886	1.41339	0.15754
Lrrc73	20.915	0.488997	0.345997	1.4133	0.157568
Zfp948	62.6737	-0.472194	0.334485	-1.41171	0.158036
Slc22a20	4.91627	-1.02347	0.725026	-1.41163	0.158059
Pnpla3	19.3009	-0.517535	0.366652	-1.41152	0.158093
D330050I16Rik	6.03565	-0.823192	0.583314	-1.41123	0.158176
Rb1	87.3522	-0.320248	0.226951	-1.41109	0.158219
Ilf3	873.17	-0.176096	0.12483	-1.41068	0.158339
AK084744;AK157531	2.12293	1.57661	1.11808	1.41011	0.158506
Prickle2	22.7266	0.570282	0.404433	1.41008	0.158517
Zfand1	56.2934	0.40179	0.284948	1.41005	0.158526
9930021J03Rik	100.626	-0.330616	0.23448	-1.41	0.15854
AK195756;Uba7	2.21095	1.58676	1.12538	1.40999	0.158544
Lpar2	62.7925	-0.376727	0.267318	-1.40928	0.158752
Mlxip	54.0183	-0.372285	0.264215	-1.40902	0.158828
Ptges3	942.781	0.259824	0.18448	1.40841	0.15901
Card10	61.265	-0.393532	0.279495	-1.40801	0.159128
Cox7c	706.067	0.287563	0.204274	1.40773	0.159211
Camkk2	90.9295	-0.38738	0.275252	-1.40736	0.15932
Zfp9	9.33852	0.850929	0.605201	1.40603	0.159716
AK046962;Ppm1e	4.33297	-1.16393	0.827814	-1.40602	0.159717
AK161166;Emp2	47.9604	-0.464501	0.330488	-1.4055	0.159872
Dhx57	68.4323	-0.309357	0.22014	-1.40527	0.15994
AK053335;Pitpnc1	253.883	-0.672432	0.478529	-1.40521	0.15996
Asb2	10.7569	1.12957	0.804396	1.40424	0.160247
Macf1	361.522	-0.244967	0.174597	-1.40304	0.160605
AK021001	0.991736	-2.37292	1.69306	-1.40156	0.161047
Tsx	54.2463	-0.644556	0.459926	-1.40143	0.161084
D630033O11Rik	6.07669	-1.07304	0.766183	-1.4005	0.161363
2410004B18Rik	264.566	0.320406	0.228853	1.40005	0.161498
Acvr1b;Mir6962	7.33642	-0.995427	0.711045	-1.39995	0.161529
AK206368;Mir6926;Sgsm2	84.4221	-0.389814	0.278516	-1.39961	0.161629
Ly6h	13.3776	0.87398	0.624592	1.39928	0.161729
Rpl5	260.817	-0.307573	0.219842	-1.39906	0.161794
Pou3f1	111.826	-0.600373	0.429177	-1.39889	0.161845
Pcnx	59.1587	0.399289	0.285437	1.39887	0.161853
Rab39	12.1573	-1.16409	0.832361	-1.39854	0.161951
Trmt61a	120.876	0.400507	0.286398	1.39843	0.161984
6430548M08Rik	7.00094	-0.859519	0.614671	-1.39834	0.162011
Eif2b5	645.86	0.170322	0.121809	1.39827	0.162032
Catsperg2	1.28874	2.07784	1.48791	1.39648	0.162569
AK132443	1.03766	-2.23079	1.59756	-1.39638	0.162601
Ap3s1	50.7948	0.630808	0.451747	1.39637	0.162602
Ahsa1	615.11	0.309623	0.221753	1.39625	0.162639
Ergic1	549.695	-0.206979	0.14826	-1.39606	0.162697
Usp12	9.11367	-0.709193	0.508188	-1.39553	0.162855
Bag1	767.024	0.193596	0.138771	1.39508	0.162993
Skida1	3.85977	-1.43939	1.03249	-1.3941	0.163289
Neurog1	2.49342	1.48948	1.0688	1.3936	0.163438
Stard13	7.95788	0.792856	0.569027	1.39335	0.163513
Ptgs2os2	2.05149	1.7053	1.22509	1.39198	0.163928
Mfap3l	11.6487	-0.699643	0.502877	-1.39128	0.16414
Zfp768	16.88	0.58108	0.417773	1.3909	0.164255
Shisa3	2.41165	-1.97084	1.41721	-1.39064	0.164334
AK216043	0.714162	-2.79528	2.01041	-1.3904	0.164407
Foxo6	40.4688	-0.447037	0.321842	-1.389	0.164834
Zfp72	3.93502	1.17046	0.842828	1.38873	0.164914
Lrrc16b	14.6428	-0.866063	0.62417	-1.38754	0.165276
Myh6	7.40719	-0.956158	0.689512	-1.38672	0.165528
Plcl1	2.0607	1.46814	1.05885	1.38654	0.165582
Thumpd1	584.515	0.225596	0.162793	1.38578	0.165814
AK136907	11.4121	0.603479	0.435591	1.38543	0.165922
AK214683;Smad3	52.9609	-0.336975	0.24348	-1.38399	0.166361
3110082J24Rik	2.73198	-1.26626	0.91499	-1.3839	0.166388
1700096K18Rik	18.5756	-0.502828	0.363473	-1.3834	0.166542
Kcnh2	58.1268	-0.538536	0.389407	-1.38297	0.166676
Zfp326	180.515	-0.509891	0.368752	-1.38275	0.166743
Ifrd1	1065.61	0.301456	0.218038	1.38258	0.166792
Ppp1r14a	307.303	0.292336	0.21148	1.38233	0.16687
AK133155	8.09229	-0.732719	0.530196	-1.38198	0.166979
Brd7	333.036	-0.328998	0.238183	-1.38128	0.167192
Rpl30	752.069	0.249694	0.180791	1.38112	0.167242
Dbn1;Mir6944	60.0115	-0.368721	0.26702	-1.38088	0.167317
Higd1a	267.499	0.306197	0.221764	1.38073	0.167361
4930539J05Rik	1.5719	1.64356	1.19045	1.38062	0.167395
Zfat	21.2664	0.586541	0.425004	1.38008	0.167561
Tcof1	972.215	-0.295702	0.214287	-1.37993	0.167607
Cd160	1.13781	2.34504	1.69995	1.37948	0.167747
Tfr2	10.1762	-0.757856	0.549385	-1.37946	0.167752
Plxna3	33.9988	-0.389132	0.282194	-1.37895	0.167909
Snord49a	48.6699	0.745349	0.54053	1.37892	0.167919
Ncapg2	210.364	0.210148	0.152461	1.37838	0.168087
AK163900;Fam193b	133.217	-0.2428	0.176152	-1.37835	0.168094
Borcs7	100.756	-0.344645	0.250066	-1.37822	0.168136
Plxnc1	3.63141	1.39033	1.00954	1.37718	0.168456
Rad52	51.06	0.368127	0.267346	1.37697	0.168522
4931406C07Rik;AK157935	93.2488	-0.447194	0.325017	-1.37591	0.16885
Dclk3	6.16528	0.886623	0.644544	1.37558	0.168951
Osgin1	2.90088	1.19954	0.872529	1.37479	0.169197
AK150759;Trim12a	77.3975	-1.90231	1.38434	-1.37416	0.169393
Pou4f2	25.8066	-1.2807	0.932623	-1.37322	0.169684
1110032F04Rik	6.64522	0.826016	0.601542	1.37316	0.169702
Mtmr11	10.4087	-0.775087	0.564479	-1.3731	0.16972
Srgap3	36.0205	0.672611	0.489872	1.37304	0.169741
AK041920;AK135196;Sipa1l3	117.265	-0.345096	0.251341	-1.37302	0.169746
Pou6f2	2.93342	-1.42292	1.03699	-1.37216	0.170014
2410021H03Rik	3.43694	-1.30817	0.953413	-1.37209	0.170035
Egln3	438.641	-0.617336	0.450229	-1.37116	0.170325
BC082591	1.62653	-1.6831	1.22801	-1.3706	0.170501
AK138421	10.973	-0.663682	0.484696	-1.36927	0.170913
Cd74;Mir5107	69.6569	-0.46746	0.341553	-1.36863	0.171115
Plpp6	18.0957	-0.478176	0.349486	-1.36823	0.171241
AK043676;Pfkp	1209.73	-0.271073	0.198241	-1.36739	0.171503
Gypc	12.2139	0.821019	0.600547	1.36712	0.171588
Hnrnpk	2879.49	0.145342	0.106342	1.36674	0.171708
9630028I04Rik	18.8193	0.71656	0.524293	1.36672	0.171714
AK149132	2.0721	-1.55569	1.13888	-1.36599	0.171942
Kdelc2	40.3552	-0.397574	0.291109	-1.36572	0.172026
Mir6992;Stx5a	190.494	0.292834	0.214435	1.36561	0.172063
Adh1	2.80007	1.50455	1.102	1.3653	0.17216
Pdzrn3	13.9463	0.801193	0.586837	1.36527	0.172167
Igsf21	75.99	-0.525132	0.384749	-1.36487	0.172294
Atl3	68.3308	-0.363414	0.266274	-1.36481	0.172313
Itgb1bp1	143.652	0.279052	0.204604	1.36386	0.172611
Tspan12	8.90015	0.835268	0.612552	1.36359	0.172698
Cars2	108.693	0.346396	0.2541	1.36323	0.17281
AK172081;Malt1	54.2294	-0.391601	0.287345	-1.36282	0.172938
Tmem251	155.19	0.335342	0.246085	1.36271	0.172974
Atp6v0b	684.791	0.333768	0.244987	1.36239	0.173074
Atg5	327.098	0.242245	0.177823	1.36228	0.173108
Serpinb9f	1.38182	-2.1833	1.60364	-1.36147	0.173366
Wif1	5.49119	1.05154	0.772623	1.361	0.173514
Zfp286	19.8273	0.531867	0.390833	1.36086	0.173559
Cpz	14.4366	-0.9164	0.673518	-1.36062	0.173635
Snord57	0.911311	2.05438	1.51064	1.35994	0.173849
Nub1	682.884	-0.375938	0.276458	-1.35983	0.173882
Wdr5b	1.76407	1.74911	1.28683	1.35923	0.174073
Mslnl	10.8932	-1.06929	0.786809	-1.35902	0.174139
Lmntd2	13.6749	-0.748156	0.550869	-1.35814	0.17442
Phyh	291.378	-0.34664	0.25524	-1.35809	0.174434
Diaph2	63.8246	-0.453871	0.334279	-1.35776	0.17454
Comp	2.63425	-1.57877	1.16296	-1.35754	0.174608
L3mbtl1	0.915514	2.56199	1.88778	1.35715	0.174734
Ankrd42	8.6071	0.757867	0.558446	1.3571	0.174749
Aftph	216.396	-0.237494	0.175037	-1.35682	0.174838
Vangl2	108.083	-0.359771	0.265185	-1.35668	0.174884
Parvb	422.214	-0.267051	0.196844	-1.35666	0.174889
Pwwp2b	46.953	-0.361421	0.266581	-1.35576	0.175175
Ptpru	44.9558	-0.422856	0.311936	-1.35558	0.175231
AF050165;Ppp2r3a	43.2935	-0.363864	0.268492	-1.35522	0.175349
Use1	452.785	0.247214	0.182424	1.35516	0.175367
Stac3	9.88655	-0.919033	0.678242	-1.35502	0.17541
Acad11;Nphp3	196.721	-0.256647	0.189459	-1.35463	0.175535
Fam20b	114.98	-0.300201	0.221729	-1.35391	0.175764
AK167137;Zc3hav1	67.527	0.637307	0.470768	1.35376	0.175813
Sec31b	4.0749	1.19895	0.886549	1.35237	0.176256
Slc25a15	209.484	-0.418824	0.309699	-1.35236	0.176261
4921525O09Rik	2.7713	-1.63638	1.21024	-1.35212	0.176338
Slc25a41	5.39108	-0.889923	0.658211	-1.35203	0.176365
Phkb	55.7586	-0.505094	0.373842	-1.35109	0.176666
Slc44a2	131.436	-0.386085	0.285758	-1.35109	0.176666
Lrp4	24.8543	-0.462018	0.342165	-1.35028	0.176926
1700001G11Rik	6.56188	0.801326	0.59361	1.34992	0.177041
Jph1	13.7174	-0.650663	0.482188	-1.3494	0.17721
Irf1	151.236	-0.32493	0.240826	-1.34923	0.177263
Nr5a2	75.2014	0.369908	0.274182	1.34913	0.177295
Cks2	99.5112	0.539231	0.399876	1.3485	0.177499
Sema4g	56.5094	-0.546135	0.405059	-1.34829	0.177567
Gm20300	15.2841	-0.550788	0.408634	-1.34787	0.177699
Ndst1	26.6858	-0.667615	0.495405	-1.34761	0.177783
Gm1653	0.78423	2.5705	1.90797	1.34724	0.177903
Amn	20.8496	0.689959	0.512161	1.34715	0.177931
Pddc1	120.144	0.299996	0.222722	1.34695	0.177996
Kif20b	322.928	-0.335738	0.24928	-1.34683	0.178035
Fam132b	15.1138	0.692758	0.514675	1.34601	0.178299
Vgf	8.11684	0.829809	0.616623	1.34573	0.178389
Pomgnt1	150.215	0.312933	0.23259	1.34543	0.178487
Clec4g	0.975523	2.01719	1.50044	1.3444	0.178821
5033404E19Rik	18.4398	-0.8867	0.65965	-1.3442	0.178885
Sh2b1	233.66	-0.193352	0.143853	-1.3441	0.178916
TRNA_Val	24.7763	0.458538	0.341169	1.34402	0.178942
Cmtm7	204.652	0.39902	0.297049	1.34328	0.179182
AK148054;AK197973;Neat1	91.4832	-0.726434	0.540927	-1.34294	0.179291
Pde4d	62.3637	-0.361147	0.269028	-1.34241	0.179462
Ap1ar	69.2714	0.388687	0.28966	1.34187	0.179638
Sec14l1	473.551	-0.322058	0.240191	-1.34084	0.179973
Svbp	291.905	0.25186	0.187876	1.34056	0.180062
Tmem121	43.5645	0.478614	0.357127	1.34018	0.180187
E030011O05Rik;Zbtb38	3.52819	-1.53938	1.14913	-1.33961	0.180372
Trappc2l	291.28	0.230753	0.172287	1.33935	0.180456
D1Ertd622e	48.9208	0.33075	0.247378	1.33702	0.181215
Hmx2	0.735032	2.36936	1.77267	1.3366	0.181352
Trmt6	306.32	0.411266	0.307812	1.33609	0.181519
Thbs4	1.3612	1.81808	1.3612	1.33565	0.181664
Tmsb10	1407.79	0.535213	0.400893	1.33505	0.181859
AK042619	1.67469	-1.96397	1.47126	-1.33489	0.181911
Ebf4	4.433	0.984957	0.737973	1.33468	0.181981
AK169493;Wdr7	54.6165	-0.296294	0.222064	-1.33427	0.182114
Clhc1	1.59195	-1.65444	1.24013	-1.33408	0.182177
Calr4	8.28057	0.797114	0.597547	1.33398	0.182212
AK180852;Fam63a	362.792	-0.330095	0.247502	-1.33371	0.1823
Rgs20	8.52476	-1.43822	1.07846	-1.33359	0.18234
Rab3b	90.3694	0.403918	0.30289	1.33355	0.182352
Thsd1	11.2544	-0.777051	0.582996	-1.33286	0.182578
Tssk4	1.67988	-2.3094	1.73285	-1.33272	0.182624
Hist1h2bm	11.9743	0.576042	0.432549	1.33174	0.182946
Epb41l3	83.8196	0.362097	0.272039	1.33105	0.183173
Zfp712	6.65035	-0.895636	0.673119	-1.33058	0.183328
Extl2	46.5721	0.385926	0.290293	1.32944	0.183704
Cacng7	1.17288	1.79213	1.34875	1.32874	0.183934
Tac2	12.4856	-1.1857	0.892408	-1.32866	0.183962
Pyroxd1	74.9129	0.35336	0.265998	1.32843	0.184036
AK141523;Itfg1	199.457	-0.223266	0.168146	-1.32781	0.184241
Aplp1	712.122	-0.302104	0.227543	-1.32768	0.184285
Plvap	42.0037	-0.402933	0.303517	-1.32755	0.184328
Bbc3	338.377	-0.318796	0.240186	-1.32729	0.184414
BC057381;Tcp11l1	7.87952	0.713426	0.537588	1.32709	0.18448
Nek6	159.973	-0.336504	0.253577	-1.32703	0.184499
Hpse	12.342	-0.897538	0.676423	-1.32689	0.184546
Spata31d1a	11.1434	-0.784246	0.591347	-1.3262	0.184772
Gm1322;Xirp2	1.09179	2.12558	1.60284	1.32614	0.184795
AK189005;mFLJ00251;Timm10b	575.275	0.16759	0.126492	1.32491	0.185202
Fbxo41	8.45936	-0.812434	0.613539	-1.32418	0.185444
Lypd6	8.52054	0.892247	0.67428	1.32326	0.18575
4930529C04Rik	40.4971	0.945412	0.715205	1.32188	0.186209
Hykk	14.0006	-0.566485	0.428553	-1.32186	0.186216
AK046372;Sfxn1	487.028	-0.234761	0.177621	-1.3217	0.186268
Evi5	215.734	-0.338403	0.256062	-1.32157	0.186313
Zfp697	3.85399	1.00733	0.76226	1.3215	0.186335
Sike1	178.176	0.24289	0.183819	1.32136	0.186382
Krt79	4.49419	0.930185	0.704685	1.32	0.186834
Ltb4r1	4.64799	-1.11974	0.848302	-1.31998	0.186842
AK036982	8.69752	-0.873815	0.662201	-1.31956	0.186982
Usp21	312.824	-0.249238	0.188909	-1.31935	0.187051
Dhrs7	135.86	-0.609356	0.461874	-1.31931	0.187065
Polr2k	71.7381	0.5696	0.431794	1.31915	0.18712
3830417A13Rik	5.18591	1.02952	0.780567	1.31894	0.187189
Bves	4.75584	0.924179	0.700882	1.31859	0.187305
Tspyl5	4.49748	-1.4642	1.11083	-1.31812	0.187465
Aqp5	8.20722	0.714984	0.542677	1.31751	0.187666
AK145396;Maml3	2.28714	1.69181	1.28455	1.31704	0.187824
Ikbke	9.03343	0.684745	0.519933	1.31699	0.187842
Mmp17	103.126	-0.42402	0.322123	-1.31633	0.188063
Cela2a	22.5332	0.712009	0.540923	1.31629	0.188078
Nlrp4f	66.8953	-0.689239	0.523791	-1.31587	0.188218
Arid5a	15.6142	0.557144	0.423531	1.31547	0.188351
Sesn3	57.3288	0.327761	0.249207	1.31522	0.188437
Atp5j	1074.32	0.278446	0.211796	1.31469	0.188615
Gm8615	156.875	-0.268179	0.204035	-1.31437	0.18872
AK138949	4.46339	-1.17035	0.890724	-1.31394	0.188868
Wdr20rt	2.79834	1.65499	1.26137	1.31206	0.189499
Prss16	12.6428	0.707724	0.53982	1.31104	0.189845
Acpp	8.14618	0.955258	0.728837	1.31066	0.189972
BC053393	0.784329	2.54451	1.94166	1.31048	0.190034
A630066F11Rik	2.79589	1.21461	0.927261	1.30989	0.190233
Myrf	91.7034	-0.469185	0.358277	-1.30956	0.190344
Ppp1cc	60.6185	0.450036	0.343659	1.30954	0.190351
Pxn	188.668	-0.256845	0.196192	-1.30915	0.190483
Anxa8	46.6532	0.365953	0.279718	1.30829	0.190774
Phpt1	186.652	-0.231105	0.176741	-1.30759	0.191012
Churc1	175.722	0.267012	0.204206	1.30756	0.191022
Slc32a1	10.5445	-0.821026	0.628151	-1.30705	0.191195
Wdfy4	1.89504	1.4428	1.10469	1.30607	0.19153
Gtpbp1	377.463	-0.377241	0.288862	-1.30596	0.191566
Drd1	0.845315	-2.98097	2.28298	-1.30574	0.191641
Aqp6	5.76077	1.12815	0.864059	1.30564	0.191674
AB347559	5.99085	-0.919584	0.704719	-1.30489	0.191929
4930405A21Rik	0.981268	2.00576	1.53718	1.30483	0.191949
4732491K20Rik	1.42958	-1.83589	1.40699	-1.30483	0.19195
AU041133	7.52823	0.906992	0.695131	1.30478	0.191968
AK029637;Ccdc171	10.9612	-0.696172	0.533786	-1.30421	0.192161
Ppp1r3b	32.2841	-0.919272	0.704867	-1.30418	0.192173
Fkbp1b	35.6318	0.453471	0.347873	1.30355	0.192386
AK143234;Scn2a1	3.04724	1.17387	0.900824	1.3031	0.192539
Adad2	32.0845	-0.437151	0.335496	-1.303	0.192575
Trp53bp2	96.1854	-0.377558	0.289776	-1.30293	0.192597
Ces1a	1.31102	1.99713	1.53377	1.30211	0.192879
Hnf4a	12.9407	-0.846795	0.650612	-1.30154	0.193075
AK206180;Serf2	198.586	0.459356	0.352935	1.30153	0.193077
B4galt7	26.7803	0.391102	0.300608	1.30104	0.193246
Krt19	96.6374	-0.652669	0.501795	-1.30067	0.193371
Ndufa12	414.378	0.320689	0.246683	1.3	0.1936
Tmem18	98.4833	0.273661	0.210527	1.29989	0.193639
Nkain4	39.632	0.424124	0.326698	1.29821	0.194214
Icam4	12.6978	0.656133	0.50547	1.29806	0.194265
Tdg	3.80911	1.08084	0.832686	1.29802	0.194281
AK054308;Riok3	424.647	-0.240533	0.185377	-1.29754	0.194446
Dnaic2	42.3758	-0.758575	0.584764	-1.29723	0.194551
Zfp382	12.5553	-0.659598	0.508487	-1.29718	0.19457
Clta	2255	0.235955	0.181903	1.29715	0.194581
Oas1d	5.41626	0.818395	0.630923	1.29714	0.194584
Rab2b	71.6315	-0.315036	0.242873	-1.29712	0.194589
Tcerg1	666.074	-0.217624	0.167791	-1.297	0.194633
Snrpb2	902.194	0.237725	0.183321	1.29677	0.194709
Stx17	34.6592	0.39929	0.308017	1.29632	0.194864
Doc2b	2.26783	-1.55973	1.20337	-1.29614	0.194928
Slco2b1	1.44284	-1.92975	1.48993	-1.29519	0.195255
AK140018;Mtg1	121.543	0.294032	0.227026	1.29515	0.195269
AK161406	1.02878	2.24017	1.72971	1.29511	0.195282
Coa7	229.081	0.376298	0.290909	1.29353	0.195829
En1	12.7585	0.847504	0.655334	1.29324	0.195928
Mit1/Lb9	22.3391	-1.3926	1.07708	-1.29294	0.196031
Csf3	0.899307	3.44556	2.66497	1.29291	0.196043
Foxo1	172.813	-0.272302	0.210639	-1.29274	0.1961
Pdc	1.42628	2.13223	1.64951	1.29264	0.196135
AK137033	0.856213	-2.08815	1.61655	-1.29173	0.196449
Prdm6	1.96835	1.29272	1.00097	1.29147	0.196539
Grrp1	11.5998	-0.653505	0.506163	-1.2911	0.19667
Fam161b	11.7281	-0.558739	0.432797	-1.291	0.196705
Zfp715	84.1372	0.335302	0.259771	1.29076	0.196786
Pdgfrl	56.5267	-0.532245	0.412582	-1.29003	0.197039
BC028528	36.9756	-0.540998	0.419376	-1.29001	0.197048
Cpsf4l	219.147	0.686892	0.532605	1.28968	0.197161
9330159M07Rik	2.03124	1.66664	1.29259	1.28938	0.197266
Clcn2	124.226	-0.268349	0.208137	-1.28929	0.197296
Tbata	10.058	-1.18252	0.917467	-1.28889	0.197435
Tmem63a	31.0725	-0.480356	0.372771	-1.28861	0.197535
Cxxc5	259.059	-0.219459	0.170436	-1.28763	0.197874
Ankrd22	0.73417	2.4541	1.9066	1.28716	0.198038
Magix	1.78107	-1.4589	1.13391	-1.28661	0.19823
Arpc4;Ttll3	882.637	0.287178	0.223248	1.28636	0.198317
Lin37	148.084	0.387316	0.301147	1.28613	0.198396
Magohb	264.113	0.394797	0.30699	1.28603	0.198434
Taco1	154.856	-0.577082	0.448769	-1.28592	0.19847
Gngt2	115.67	-0.565934	0.440101	-1.28592	0.198471
Pla2g4f	7.3424	0.80282	0.624398	1.28575	0.19853
Abcc3	13.3405	1.21425	0.944686	1.28535	0.198671
Naa25	358.49	-0.390989	0.304233	-1.28516	0.198736
Wbp5	2341.06	0.19801	0.154162	1.28443	0.198992
Cnnm1	2.26414	1.45602	1.13363	1.28439	0.199006
Rfx4	2.47024	-1.3713	1.06783	-1.2842	0.199073
Eif5a2	70.9744	0.361704	0.281699	1.28401	0.19914
1700102P08Rik	10.4563	0.574668	0.447714	1.28356	0.199296
Epb41l1	133.054	-0.33099	0.258012	-1.28285	0.199544
Map3k2	56.5017	-0.393145	0.306897	-1.28103	0.200182
Mgat5b	46.7882	-0.379587	0.296607	-1.27976	0.200628
AK142048	2.71224	-1.40469	1.09796	-1.27937	0.200767
Ddr1	186.438	-0.209096	0.163441	-1.27934	0.200777
Sec11a	593.361	0.211874	0.165673	1.27887	0.200942
Tesk1	131.33	0.434495	0.339922	1.27822	0.201172
Anks1b	0.711486	2.45324	1.92017	1.27762	0.201384
Cul2	578.259	-0.231609	0.181315	-1.27738	0.201467
Srl	38.5996	-0.670733	0.525109	-1.27732	0.201489
Nfu1	768.671	0.255025	0.199664	1.27727	0.201507
AK020833;Galc	31.593	0.384338	0.300966	1.27702	0.201597
Rnu11	3.39508	1.08405	0.849271	1.27645	0.201797
Chrnb2	3.57608	1.26929	0.994775	1.27596	0.201971
Cep135	55.1636	0.341218	0.267537	1.27541	0.202166
Pnp	663.137	-0.491425	0.385316	-1.27538	0.202174
Pde5a	11.3663	0.682404	0.535141	1.27519	0.202243
Eny2	601.153	0.262866	0.206209	1.27475	0.202396
Sbno1	514.593	-0.284169	0.222963	-1.27451	0.202483
Acp5	97.2364	-0.572728	0.449696	-1.27359	0.202809
Efna4	67.4383	0.435175	0.341696	1.27357	0.202814
Igfbp4	409.777	-0.301056	0.236475	-1.2731	0.202983
Mir1906-1	1.22047	2.63062	2.0664	1.27305	0.203002
Papolg	99.5219	-0.281141	0.220884	-1.2728	0.203089
Atp6v1g2	3.09486	-1.04385	0.820654	-1.27197	0.203385
Ceacam1	13.4066	-1.24705	0.980459	-1.2719	0.203407
Adat1	55.4377	-0.355256	0.27934	-1.27177	0.203455
Arhgap25	1.18223	-1.87354	1.47349	-1.27149	0.203553
H2-K1	376.476	-0.46989	0.369596	-1.27136	0.2036
Rprd1b	119.843	0.349558	0.275219	1.27011	0.204047
Zfp81	12.8601	-0.529373	0.416845	-1.26995	0.204102
Cngb1	11.2539	-0.772627	0.609385	-1.26788	0.204841
AK049501;Pds5a	40.2883	-0.515074	0.406311	-1.26768	0.204911
Jpx	21.9041	-0.459877	0.362825	-1.26749	0.204981
Faf1	883.452	0.189706	0.149787	1.26651	0.205332
C330006A16Rik	54.9463	0.414634	0.327446	1.26627	0.205418
Bbs10	9.17756	-0.79616	0.628764	-1.26623	0.205431
Vti1b	206.631	0.21942	0.173316	1.26601	0.205509
1700028J19Rik	2.84428	-1.10326	0.871497	-1.26594	0.205535
BC079901	1.09717	2.02226	1.59858	1.26504	0.205858
BC060616;D930016D06Rik	46.8263	-0.31778	0.251395	-1.26406	0.206207
Papolb	4.72624	0.874103	0.691579	1.26392	0.206258
Prelid2	421.943	-0.409158	0.323855	-1.2634	0.206446
Acads	293.916	-0.278602	0.220694	-1.26239	0.206807
Hist1h2bk	31.5725	0.472839	0.37462	1.26218	0.206883
P2rx3	3.73383	-1.09889	0.870755	-1.262	0.206949
Fam57b	17.4824	-0.617954	0.489795	-1.26166	0.207071
Asb8	88.1546	0.288763	0.229054	1.26068	0.207425
Ppp6r3	763.203	-0.211056	0.16744	-1.26049	0.207494
Zfp97	4.47804	0.859246	0.681828	1.26021	0.207594
Pcif1	313.141	-0.25359	0.201251	-1.26006	0.207646
Nkx6-2	61.4323	-0.699073	0.555074	-1.25942	0.207878
Osbpl3	37.2311	0.37021	0.293991	1.25926	0.207938
Trf	78.4365	-0.786153	0.624304	-1.25925	0.207941
Bcas2	1614.43	0.196123	0.155768	1.25907	0.208006
Mir6359;Rttn	58.6266	-0.280506	0.222831	-1.25883	0.208092
Gnai1	95.027	-0.432188	0.343465	-1.25832	0.208277
Mmp3	52.4037	-0.604682	0.480614	-1.25814	0.208339
AF032968	1.90895	-1.79464	1.42642	-1.25814	0.20834
AK171952;Tpgs2	144.992	-0.238381	0.189516	-1.25784	0.208449
Rnaseh2a	671.419	0.258279	0.205486	1.25692	0.208782
Mrps24	2003.75	0.261851	0.208353	1.25676	0.208839
KR348528	14.7851	-0.690629	0.5497	-1.25637	0.208981
Armc9	84.2024	-0.395796	0.315044	-1.25632	0.209001
Dnajc28	6.66569	-0.782524	0.622942	-1.25617	0.209053
Etv4	474.699	-0.509948	0.40596	-1.25615	0.209061
AK171687;Bcl10	289.949	0.301356	0.239959	1.25587	0.209165
Calca	249.705	-0.630464	0.502051	-1.25578	0.209197
Mir99ahg	8.76852	-1.16839	0.930486	-1.25568	0.209232
D630045M09Rik	239.841	0.372527	0.29675	1.25536	0.20935
Tmem63b	287.622	-0.285267	0.227253	-1.25528	0.209376
Hmgxb3	221.878	-0.310744	0.247677	-1.25463	0.209611
Senp8	53.5599	-0.415842	0.331507	-1.2544	0.209697
Epn3	1.69393	-2.10745	1.68041	-1.25413	0.209795
AK133808	51.6168	-0.498453	0.397669	-1.25344	0.210046
Jazf1	4.81963	0.869567	0.693808	1.25333	0.210087
Spin1	209.038	0.242566	0.193683	1.25239	0.210429
Fgf21	4.258	-1.40951	1.12556	-1.25227	0.210472
Dhfr	694.968	0.32638	0.260651	1.25217	0.210507
Zfp661	10.0744	-0.706956	0.564667	-1.25199	0.210575
Pram1;Zfp414	199.554	-0.301963	0.241237	-1.25173	0.210669
Zdhhc8	159.084	-0.31499	0.251708	-1.25141	0.210784
5031439G07Rik	220.212	-0.264742	0.211646	-1.25087	0.210981
Myo1c	284.702	-0.262191	0.209613	-1.25083	0.210995
Utf1	4776.35	-0.22114	0.176817	-1.25067	0.211054
Ptpn14	111.013	-0.5076	0.405999	-1.25025	0.211208
Add2	3.94234	0.90682	0.725514	1.2499	0.211336
Iah1	126.234	-0.340694	0.272599	-1.2498	0.211372
Ahnak2	55.4664	-0.491617	0.393442	-1.24953	0.211471
Dlx3	7.24534	-1.1594	0.927878	-1.24951	0.211477
1700021F07Rik	0.997526	2.08745	1.67072	1.24943	0.211509
Oxct2a	0.672403	2.20765	1.76709	1.24932	0.21155
Dsp	30.3879	-0.452244	0.362084	-1.249	0.211664
Erap1	10.1687	-0.586159	0.469397	-1.24875	0.211757
Cstf1	282.278	0.178423	0.142901	1.24858	0.21182
Arl8b	436.373	0.264148	0.211584	1.24843	0.211874
Igf2bp3	247.582	-0.471636	0.377797	-1.24838	0.21189
4930480K23Rik	0.797009	-2.1617	1.73177	-1.24826	0.211936
AK028530;Itih5	6.52932	1.21727	0.975588	1.24773	0.212128
Ttc9	20.7251	-0.491398	0.393855	-1.24766	0.212154
Pgk1	154.232	0.442833	0.35501	1.24738	0.212257
Kbtbd13	4.07337	-1.18281	0.948603	-1.24689	0.212437
Dguok	264.658	0.297904	0.239019	1.24636	0.212633
Lyzl4	1.54394	1.55232	1.2459	1.24594	0.212785
Capn2	136.49	-0.464218	0.372669	-1.24566	0.212889
Lrr1	136.439	0.299188	0.240215	1.2455	0.212947
Pik3c3	152.73	-0.309176	0.248288	-1.24523	0.213046
Apitd1	120.215	0.236742	0.190216	1.24459	0.213281
Slc7a5	1197.51	-0.360793	0.28989	-1.24459	0.213284
Robo3	8.05442	-1.21474	0.97646	-1.24403	0.213489
St8sia1	33.7216	0.821824	0.660871	1.24355	0.213666
AK086315	5.50351	-0.876292	0.704729	-1.24345	0.213704
Snord49b	66.423	0.680081	0.547406	1.24237	0.214101
AK142416;Rsf1	194.306	-0.25156	0.202546	-1.24199	0.214241
Plek2	21.7639	-0.522251	0.420681	-1.24144	0.214443
Usp26	111.063	0.74487	0.600048	1.24135	0.214476
Sox17	7.85055	-1.01158	0.815181	-1.24093	0.214631
Mfsd1	235.434	0.396905	0.319981	1.2404	0.214827
2810021J22Rik	27.246	0.362848	0.292585	1.24015	0.214922
Ssc5d	17.1753	-0.654251	0.527566	-1.24013	0.214927
AK037964;Atf6	169.235	-0.261222	0.210648	-1.24009	0.214943
C1d	336.661	0.22786	0.183773	1.2399	0.215012
Vwa3b	2.87328	-1.41575	1.14219	-1.23951	0.215156
Rab32	9.72722	0.636657	0.513681	1.2394	0.215196
AK198669;Ddr2	18.5305	0.595437	0.480952	1.23804	0.215702
Tpbg	58.288	0.277355	0.22403	1.23803	0.215707
Ido2	1.99311	-1.57246	1.27057	-1.2376	0.215863
Vkorc1l1	202.168	-0.222803	0.18006	-1.23739	0.215943
Large	35.8134	-0.399409	0.322988	-1.23661	0.216232
Ttc36	1.44196	-1.54485	1.24948	-1.23639	0.216313
Smim24	1.16561	2.25973	1.8282	1.23604	0.216444
Spred3	16.2801	0.484474	0.391974	1.23599	0.216464
4930461G14Rik	135.814	-0.475955	0.385169	-1.2357	0.216569
Parm1	14.912	0.515896	0.417613	1.23534	0.216702
Agpat5	371.899	-0.246997	0.200012	-1.23492	0.216862
Nlrp4c	14.9538	1.4888	1.2057	1.2348	0.216907
4930507D05Rik	1.26082	-1.87119	1.51543	-1.23476	0.216921
Cpox	267.481	-0.238471	0.193213	-1.23424	0.217114
Crym	55.0319	0.314015	0.254515	1.23378	0.217285
Wasf3	36.1888	0.473639	0.383931	1.23365	0.217332
Rab22a	180.86	0.320841	0.260119	1.23344	0.217411
Hsf4	11.1018	-0.612645	0.49673	-1.23336	0.217442
Calu	347.731	0.392853	0.318548	1.23326	0.217478
AB124611	0.699423	2.14857	1.74299	1.23269	0.21769
AK211473	1.20857	-1.86773	1.51531	-1.23257	0.217735
Edf1	1299.15	0.189252	0.153561	1.23242	0.217793
Kcng1	0.665186	-2.77021	2.24817	-1.2322	0.217873
Pcdhb17	1.42247	1.5281	1.24015	1.23219	0.21788
Gm4961	9.83168	-0.649387	0.527096	-1.23201	0.217946
Cd7	11.6559	0.736878	0.598269	1.23168	0.218067
A830082K12Rik	1.37772	-1.85204	1.50383	-1.23155	0.218118
Prss38	13.6739	0.550424	0.446949	1.23152	0.21813
1700016D06Rik	6.78339	-0.746425	0.606129	-1.23146	0.21815
Crybg3	24.9638	0.465451	0.378134	1.23092	0.218354
TRNA_Sup	0.861395	2.42358	1.97017	1.23014	0.218645
Mir678;Prmt2	84.2043	0.302561	0.246087	1.22949	0.218888
Asic2	0.987574	-2.44391	1.98777	-1.22947	0.218894
Sar1a	631.535	0.218988	0.178116	1.22946	0.218898
DQ690118	1.13226	1.66775	1.35677	1.22921	0.218995
2410004I01Rik	7.61475	-0.745136	0.606315	-1.22896	0.219088
Mir8092;Zfp518a	220.332	0.287738	0.234255	1.22831	0.219332
Ppp1r36	4.43753	-0.900356	0.73306	-1.22822	0.219366
Btnl1	1.63642	1.58107	1.28796	1.22758	0.219606
Rnf135	19.5154	0.542919	0.442398	1.22722	0.21974
Hax1	25.7115	0.591633	0.482267	1.22677	0.219908
CK137956	0.797296	-2.92563	2.38506	-1.22665	0.219955
AK048803;BC055065;Melk	341.87	0.198257	0.161644	1.2265	0.22001
Ide	667.825	-0.288125	0.234917	-1.2265	0.220011
Bcar1	284.062	-0.370949	0.302501	-1.22627	0.220095
Aspa	1.48925	1.62091	1.3221	1.22601	0.220194
Synm	14.2942	-0.725036	0.591545	-1.22566	0.220325
Shprh	105.911	-0.229327	0.187106	-1.22566	0.220328
Kat2b	133.583	-0.324638	0.264884	-1.22559	0.220354
AK211100;Ehmt2	657.287	-0.314592	0.256698	-1.22553	0.220374
Inppl1	312.564	-0.448117	0.365653	-1.22553	0.220377
Tgm3	19.0259	-0.695721	0.567865	-1.22515	0.220517
Stoml2	601.455	0.217407	0.177462	1.22509	0.220542
Abhd18	13.3048	0.556292	0.45432	1.22445	0.220782
Myo1b	190.176	-0.209188	0.170912	-1.22395	0.220971
Acvrl1;AK087308	21.873	-0.568062	0.464258	-1.22359	0.221106
Pdzd11	326.812	0.366512	0.299754	1.22271	0.221439
AK156827	1.56233	-1.92446	1.57471	-1.2221	0.221671
AK142028;Kif2a	174.67	0.225164	0.184304	1.2217	0.221823
Gar1	1109.92	0.240921	0.197205	1.22168	0.221829
Snord35b	425.939	0.362975	0.297177	1.22141	0.22193
Rbm15	41.3857	0.599005	0.490626	1.2209	0.222124
Ldb3	27.6849	0.417458	0.34195	1.22082	0.222156
Secisbp2	126.92	-0.257158	0.210696	-1.22051	0.22227
Akap8l	153.791	-0.430014	0.352548	-1.21973	0.222567
Msln	53.6572	-0.743908	0.6102	-1.21912	0.222798
Zfp46	14.5001	0.535459	0.439414	1.21858	0.223006
Cyp27a1	10.1532	-0.687532	0.564272	-1.21844	0.223057
AK017434;Kif5b	324.419	-0.380023	0.311908	-1.21838	0.22308
BC147260;Mgea5	519.135	-0.218918	0.179713	-1.21816	0.223165
Scn9a	2.59073	-1.23073	1.01084	-1.21753	0.223401
Rgl2	113.204	-0.421801	0.346528	-1.21722	0.223521
Gas8	62.6714	0.485269	0.398911	1.21648	0.2238
6430573F11Rik	6.60248	-0.922643	0.758468	-1.21646	0.223811
Med12l	10.0949	0.632554	0.520003	1.21644	0.223816
Hapln3	14.5176	-0.683295	0.561949	-1.21594	0.224009
Ppp1r12c	247.384	-0.20688	0.170145	-1.21591	0.224021
BC056457;Myt1l	2.26278	2.09493	1.72371	1.21536	0.224228
Micall2	30.5718	-0.582659	0.479456	-1.21525	0.224271
Kdm1a	709.186	-0.145452	0.119714	-1.215	0.224367
Gck	14.829	-0.831263	0.684572	-1.21428	0.22464
Slc20a2	275.199	-0.385157	0.317213	-1.21419	0.224675
AK186650	95.5951	-0.359461	0.296069	-1.21411	0.224704
Amd1	44.1609	0.32542	0.268091	1.21384	0.224807
Sdr9c7	1.02661	-2.42949	2.00365	-1.21253	0.225308
Fam212a	17.0519	-0.512667	0.422874	-1.21234	0.225382
Rap1gap2	42.5257	-0.493124	0.406899	-1.21191	0.225548
Eldr	4.34427	-0.93053	0.767996	-1.21163	0.225653
1810024B03Rik	42.8871	-0.526759	0.434813	-1.21146	0.225718
E2f2	31.6469	-0.443763	0.366394	-1.21116	0.225833
Tmem64	319.346	0.269647	0.222644	1.21111	0.225852
Fam35a	90.3348	-0.317772	0.262431	-1.21088	0.225943
Art1	11.0269	-0.720999	0.595632	-1.21048	0.226096
Angptl7	4.11504	-0.912992	0.754287	-1.2104	0.226124
Cep192	297.341	-0.225101	0.186036	-1.20999	0.226283
Chrna9	55.3467	-0.339678	0.280835	-1.20953	0.22646
Slc30a7	126.225	0.261414	0.216159	1.20936	0.226526
Maf1	501.548	0.159716	0.132075	1.20929	0.226552
Plp2	144.659	0.442885	0.366263	1.2092	0.226587
4921531C22Rik	2.94683	-1.03853	0.858927	-1.2091	0.226623
Irs2	16.718	-0.531633	0.439743	-1.20896	0.226677
AK087678	3.38173	-1.07837	0.892151	-1.20873	0.226767
Entpd2	17.8186	-0.696925	0.576672	-1.20853	0.226844
Zfp664	202.454	-0.219092	0.181296	-1.20848	0.226863
AK171764	4.90726	-0.847263	0.701335	-1.20807	0.22702
6430571L13Rik	1.57877	1.44006	1.19284	1.20725	0.227335
Mvp	221.072	-0.250987	0.207951	-1.20695	0.227451
BC082775;Gm5779	2.19733	-1.55321	1.28719	-1.20667	0.227559
Ccdc174	121.885	0.256417	0.212585	1.20618	0.227746
Mir8108;Tacc1	143.021	-0.243224	0.201651	-1.20616	0.227754
Anapc15	344.581	0.172872	0.143355	1.20591	0.227854
Dnali1	1.16893	-1.81675	1.50701	-1.20553	0.227999
AK145614	19.3814	-0.826213	0.685505	-1.20526	0.228103
Zfpm2	3.02646	-1.07859	0.895195	-1.20486	0.228257
Gm10069	25.6086	0.65749	0.545748	1.20475	0.228299
Sh3glb1	309.769	0.174212	0.144691	1.20403	0.22858
Meis3	35.2796	0.374694	0.311238	1.20388	0.228635
AK080816;AK138135;Pcdh15	1.3567	-2.16078	1.79618	-1.20299	0.228981
Rhox6	82.7605	0.707851	0.58842	1.20297	0.228988
AK046250;R3hdm2;unknown	212.898	-0.253396	0.210692	-1.20268	0.229099
2210409E12Rik	662.557	0.367394	0.305534	1.20246	0.229184
Serpinb9	3.69922	0.904899	0.752832	1.20199	0.229366
Synj2	20.0521	-0.442037	0.367757	-1.20198	0.22937
Mmgt2	41.0501	-0.388557	0.323364	-1.20161	0.229515
AK077350	3.97189	1.09954	0.915066	1.2016	0.229519
AK079912	8.86003	0.829417	0.690566	1.20107	0.229724
Steap1	108.412	-0.575883	0.479479	-1.20106	0.229729
Catsperg1	10.8702	-0.599728	0.499427	-1.20083	0.229817
AK047347;Mtmr12	226.607	0.290556	0.242011	1.20059	0.229911
Mir692-1	1.1677	-2.42497	2.02053	-1.20017	0.230075
AK012891;Chpf2;Mir671	38.3771	0.357183	0.297631	1.20009	0.230106
Pbxip1	63.6566	0.32999	0.275546	1.19758	0.231079
Mmaa	25.69	-0.453694	0.37887	-1.19749	0.231114
4930563E22Rik;AK043242	4.38027	-0.933818	0.779831	-1.19746	0.231127
Gbas	248.304	-0.393383	0.328587	-1.1972	0.23123
Peli1	249.045	-0.199164	0.166391	-1.19696	0.231321
Cdx1	48.0205	-0.720198	0.602023	-1.1963	0.231581
Srbd1	147.859	-0.213705	0.178641	-1.19628	0.231587
Gm13199	4.39179	-0.834298	0.697537	-1.19606	0.231672
Efcab6	4.89467	-0.795828	0.665452	-1.19592	0.231727
Cd96	2.87338	-1.46231	1.22328	-1.1954	0.23193
Dnajb14	36.4902	0.368047	0.308051	1.19476	0.232181
Mir7653;Tlcd1	108.575	0.365162	0.305814	1.19406	0.232453
AK051383	8.72697	0.690063	0.577918	1.19405	0.232458
Tmem206	52.9141	-0.284322	0.238144	-1.19391	0.232514
AK033254;Atp7a	93.014	-0.428803	0.359185	-1.19382	0.232547
Btn2a2	4.43306	-1.15963	0.971698	-1.19341	0.232709
Prkd2	31.0167	-0.496559	0.41612	-1.19331	0.232749
Cul7	195.363	-0.272078	0.228008	-1.19328	0.232758
Erich2	2.17556	1.52148	1.27507	1.19325	0.232771
S1pr2	148.998	-0.315863	0.264764	-1.193	0.23287
Ptges2	121.373	0.22557	0.189234	1.19202	0.233253
Rpl35	578.918	0.506668	0.425094	1.1919	0.233302
Ripk3	82.6673	-0.449396	0.377048	-1.19188	0.233308
Ngrn	328.656	-0.242049	0.20316	-1.19142	0.233489
Rnf10	1635.05	-0.143994	0.120864	-1.19137	0.233509
Kalrn	34.7145	-0.357779	0.300342	-1.19124	0.23356
Cfp	63.9007	0.522599	0.43896	1.19054	0.233834
Zfp598	271.968	-0.226718	0.190477	-1.19026	0.233943
Plin2	164.07	0.488343	0.410495	1.18964	0.234186
Hoxb3	5.78723	0.912288	0.766941	1.18952	0.234237
Csnk1a1	1075.09	-0.278004	0.23376	-1.18927	0.234333
Npepps	792.587	-0.28418	0.238958	-1.18925	0.234343
Lsm3	1377.99	0.343719	0.289064	1.18907	0.234411
D3Ertd254e	93.7902	0.293842	0.247122	1.18906	0.234417
Clic6	4.62202	-0.943409	0.79385	-1.1884	0.234677
Slitrk5	5.24177	0.899687	0.75707	1.18838	0.234684
Rab13	41.6802	0.318416	0.268063	1.18784	0.234897
Mfsd14a	417.541	0.203157	0.171035	1.18781	0.234907
Ar	3.44007	1.05881	0.891397	1.1878	0.23491
Tlr6	0.666646	2.32538	1.95777	1.18777	0.234924
Efhc2	20.9545	0.903318	0.760545	1.18772	0.234942
D330023K18Rik	7.2381	-0.843102	0.710145	-1.18722	0.235139
Arl16	61.26	0.287636	0.242297	1.18712	0.23518
Prima1	2.50335	-1.22462	1.03159	-1.18711	0.235182
D930028M14Rik	15.0462	-0.830801	0.699914	-1.187	0.235226
Soat2	20.5934	-0.573324	0.483024	-1.18695	0.235249
Zfp395	67.9625	-0.358389	0.302089	-1.18637	0.235477
AK084485;Mfsd8	28.8047	0.440187	0.371084	1.18622	0.235536
A230056P14Rik	1.34238	-2.01217	1.69694	-1.18576	0.235716
Naif1	0.742424	2.25126	1.89876	1.18564	0.235763
Cacna1h	22.1532	-0.683247	0.576375	-1.18542	0.235851
Nkx6-1	1.49596	2.02407	1.70751	1.18539	0.235862
Ttc32	106.245	-0.317399	0.267759	-1.18539	0.235863
Gpr137b	66.973	0.613923	0.517946	1.1853	0.235897
Tns3	363.046	-0.383007	0.323293	-1.1847	0.236134
Esp5;Esp6;Gm44501	1.52169	-1.96375	1.65839	-1.18413	0.236361
Gm4013	22.4135	-0.495861	0.418771	-1.18408	0.23638
Exosc2	411.849	0.165881	0.140155	1.18355	0.236591
Dedd2;Mir7048	71.8772	0.299852	0.253401	1.18331	0.236686
Rtbdn	1.21592	1.69223	1.43025	1.18318	0.23674
Fut10	30.9581	-0.49047	0.414691	-1.18274	0.236914
Wnt11	14.0535	-0.515497	0.435869	-1.18269	0.236933
Triqk	20.4137	0.485076	0.410273	1.18232	0.237078
Tigd2	104.496	0.516999	0.437391	1.18201	0.237203
Rabggta	250.554	-0.170772	0.144491	-1.18189	0.23725
Cygb	2.59774	-1.18574	1.00337	-1.18176	0.237301
Tmem229a	2.19577	-1.46662	1.24115	-1.18166	0.237339
AK018309	1.6974	-1.58343	1.34024	-1.18145	0.237423
Gne	64.5501	-0.292749	0.247885	-1.18099	0.237608
Suv39h1	96.0856	-0.297181	0.251706	-1.18067	0.237735
Nop2	1192.11	0.273646	0.231781	1.18063	0.237751
Galnt1	187.283	-0.207786	0.176026	-1.18043	0.23783
Fam196b	0.859844	-2.13297	1.80766	-1.17996	0.238016
Hps5	42.1504	-0.383712	0.325317	-1.1795	0.238198
Fbxl4	50.7238	-0.426926	0.361973	-1.17944	0.238222
Zfp618	5.67974	0.917884	0.77841	1.17918	0.238328
Thbs3	42.1374	0.459902	0.390025	1.17916	0.238335
Abcd3	179.915	0.267834	0.227174	1.17898	0.238406
Commd9	110.073	0.34122	0.289595	1.17826	0.238691
Eno3	84.9896	-0.257694	0.218755	-1.178	0.238796
Prdx4	1103.09	0.274587	0.233105	1.17795	0.238815
Map3k6	33.6436	-0.55137	0.468082	-1.17793	0.238823
AK054042	1.2564	-1.57587	1.3383	-1.17752	0.238989
Gps2	141.051	0.195764	0.166293	1.17722	0.239106
Rltpr	81.2201	-0.316122	0.268596	-1.17694	0.239219
Bhlhe40	346.253	-0.47946	0.407449	-1.17673	0.239302
Gm10439;Gm15085;Gm15091;Gm15093;Gm15097;Gm15107;Gm15114;Gm15127;Luzp4	4.34053	0.987616	0.839339	1.17666	0.239332
Sh3yl1	47.1108	0.409318	0.347904	1.17653	0.239384
Ndnf	4.66146	-0.850958	0.723303	-1.17649	0.2394
Gm10432	3.2405	0.967787	0.822827	1.17617	0.239526
AK197669;Setd4	59.5703	0.265514	0.225752	1.17613	0.239542
Timm21	61.3954	-0.537937	0.45744	-1.17597	0.239606
Ppib	1170.39	0.147925	0.125801	1.17587	0.239647
BC024571;Itga6	372.835	-0.296715	0.25234	-1.17585	0.239654
AK043474	1.39603	-1.85818	1.5804	-1.17576	0.23969
Rpl10l	224.022	0.438796	0.373226	1.17568	0.239721
Pou2f1	259.871	-0.264415	0.225032	-1.17501	0.239989
Slc12a5	5.90129	0.776992	0.661283	1.17498	0.240004
Pkp3	84.7803	-0.314257	0.267503	-1.17478	0.240082
Trmt112	103.63	-0.288484	0.245576	-1.17472	0.240105
Scarna2	2.52949	-1.28363	1.09301	-1.1744	0.240235
AK153014	2.90017	-1.14856	0.978223	-1.17413	0.240342
AK202494	91.0782	0.295053	0.251298	1.17411	0.240349
Mydgf	362.457	0.182734	0.15565	1.174	0.240393
AK036072;Fbxo36	36.5309	0.356222	0.303461	1.17386	0.24045
AK037852;Ube2q2	120.243	0.22303	0.190034	1.17363	0.240543
Sel1l3	1.45302	1.49272	1.27202	1.1735	0.240596
AK164146;Ppa2	538.672	0.206615	0.176147	1.17296	0.24081
Rasl12	6.79818	-0.745827	0.635928	-1.17282	0.240869
Rpl31-ps12	5.00004	0.887027	0.756422	1.17266	0.240931
Brinp2	3.94766	0.937023	0.799175	1.17249	0.241001
Tmem129	37.3696	0.348339	0.297129	1.17235	0.241056
Syt11	89.0629	0.324672	0.276998	1.17211	0.241153
Zfp212	59.9422	0.324345	0.27678	1.17185	0.241256
Plet1os	0.882058	-2.31842	1.97882	-1.17162	0.24135
Gdap1	0.76289	-1.94137	1.65781	-1.17104	0.241582
Mall	4.73112	1.55125	1.32479	1.17094	0.241622
Gpr143	7.38862	1.02516	0.87567	1.17071	0.241715
Xkr8	94.4904	-0.331777	0.283444	-1.17052	0.241791
Adcy6	21.5	-0.473733	0.404721	-1.17052	0.241793
C2cd4a	0.579752	-2.45223	2.09502	-1.1705	0.241798
Shtn1	5.15246	1.19481	1.021	1.17023	0.241908
Acvr1	41.2233	0.357117	0.305394	1.16936	0.242257
Mcrs1	380.889	0.172532	0.147592	1.16898	0.242413
BC049265;Tub	40.8107	0.406213	0.347599	1.16863	0.242554
Sox6	4.4817	0.967727	0.82811	1.1686	0.242566
Acot4	0.887803	-2.08672	1.78596	-1.1684	0.242645
Dhh	3.79579	-0.9149	0.783061	-1.16836	0.24266
Pcdh1	13.7209	-0.699142	0.598458	-1.16824	0.24271
Alox5ap	22.7528	-0.535844	0.458692	-1.1682	0.242727
6030443J06Rik	1.28019	-1.60769	1.3763	-1.16812	0.242757
Lrrfip2	305.859	0.236039	0.20208	1.16805	0.242787
Mbnl3	42.3569	0.425667	0.36516	1.1657	0.243736
Zfp950	38.9849	-0.33465	0.2872	-1.16522	0.243932
Ppp4r2	235.4	0.224417	0.192606	1.16516	0.243953
Selplg	21.5815	-0.580281	0.498101	-1.16499	0.244025
Vsig2	18.8434	-0.688998	0.591449	-1.16493	0.244046
AK167360;Hinfp	34.4932	0.351657	0.301877	1.1649	0.244058
Uggt2	15.7887	0.564839	0.485031	1.16454	0.244204
Muc1	6.14434	0.692845	0.594955	1.16453	0.244208
Mios	154.569	0.269211	0.231222	1.1643	0.244302
Stc1	36.4246	-0.645702	0.554655	-1.16415	0.244363
Dfna5	9.65204	0.583834	0.50152	1.16413	0.244372
Lca5	39.2997	-0.340772	0.292733	-1.1641	0.244382
AK047263;Dip2b	78.9449	-0.276715	0.237926	-1.16303	0.244818
Gm38509	22.8643	-0.725503	0.624031	-1.16261	0.244989
D17Wsu92e	403.016	-0.218637	0.188138	-1.16211	0.245191
Mybph	2.14918	1.2852	1.10614	1.16188	0.245286
4930552P12Rik	0.895054	1.99979	1.72156	1.16161	0.245393
Gm14305	1.56175	-1.96654	1.69314	-1.16147	0.245449
AK050060	0.69927	-2.73657	2.35635	-1.16136	0.245495
AK021338	8.33167	-0.725622	0.624928	-1.16113	0.24559
Tmem246	15.939	0.499426	0.430178	1.16097	0.245653
Zfp423	80.0374	-0.692353	0.596581	-1.16054	0.245831
Ell	104.807	-0.225621	0.194451	-1.16029	0.245929
Rpgr;Srpx	103.856	0.349535	0.301344	1.15992	0.246081
2700054A10Rik	2.83458	1.0779	0.929317	1.15989	0.246095
Sertm1	4.56895	0.945739	0.815526	1.15967	0.246184
Ccdc85b	167.836	-0.306336	0.264189	-1.15953	0.246239
Ptpro	2.32299	1.42369	1.22811	1.15925	0.246353
D4Ertd617e;Ebna1bp2	1427.97	0.202997	0.175275	1.15816	0.246798
Pou5f1	173.728	0.262222	0.226573	1.15734	0.247133
Sesn1	115.18	-0.424077	0.366434	-1.15731	0.247146
Sin3a	385.522	-0.173953	0.150308	-1.15731	0.247147
N4bp2l2	345.037	-0.198324	0.171404	-1.15705	0.24725
Traf5	5.23327	0.851779	0.736163	1.15705	0.247251
1500015A07Rik	11.9126	-0.528859	0.45709	-1.15701	0.247268
Rgs10	46.8778	0.338672	0.292813	1.15661	0.24743
Trim40	3.0491	-1.09188	0.944275	-1.15632	0.247552
Vmn2r-ps129	1.01001	2.03021	1.75595	1.15619	0.247604
Tmem127	62.5002	0.31117	0.269169	1.15604	0.247665
Snhg14	358.164	-0.264764	0.229114	-1.1556	0.247844
Fbxw10;Trim16	18.0955	0.466427	0.403639	1.15555	0.247863
AK043804	27.3098	-0.401906	0.347849	-1.1554	0.247926
Bhmt2	1.52084	-1.48433	1.28497	-1.15515	0.248031
Nrip2	1.04272	-2.28209	1.97683	-1.15442	0.248329
Pmm2	52.9969	0.385467	0.334026	1.154	0.248499
Lrpap1	503.046	0.292057	0.253183	1.15354	0.248689
AK165476;Nqo2	320.412	-0.398994	0.345925	-1.15341	0.248741
Trmt1l	187.236	-0.537555	0.466071	-1.15338	0.248756
AK013890;Eprs	1568.63	-0.245649	0.213021	-1.15316	0.248843
Snx16	104.299	0.284268	0.246518	1.15313	0.248856
Notch3	219.398	-0.224079	0.194443	-1.15241	0.249151
AK163127;Dzip3	102.473	-0.349528	0.30344	-1.15189	0.249368
Slc39a2	3.61131	-1.12803	0.979594	-1.15153	0.249516
Casq1	23.0572	-0.399299	0.346794	-1.1514	0.249567
Mir7226;Ptprf	525.094	-0.158895	0.13806	-1.15091	0.249768
Pum1	554.34	-0.225076	0.195648	-1.15041	0.249975
Ldhb	1816.2	0.655199	0.569566	1.15035	0.25
Rpl35a	1968.1	0.299272	0.260162	1.15033	0.250007
Vav3	5.15919	0.802173	0.69795	1.14933	0.250421
Ccer2	2.50513	1.25002	1.08774	1.14918	0.25048
Arid4a	131.781	-0.224358	0.195258	-1.14904	0.250541
Defb36	0.549438	2.77164	2.41273	1.14876	0.250656
AK079754	2.60871	-1.19494	1.04021	-1.14875	0.250661
Alg13	1298.55	0.242142	0.210896	1.14816	0.250903
Rps11	6726.94	0.309216	0.269412	1.14775	0.251074
Slc2a13	2.16705	-1.82522	1.59032	-1.14771	0.25109
Pemt	51.1515	0.443659	0.386736	1.14719	0.251303
Twsg1	208.348	-0.30031	0.26182	-1.14701	0.251378
Retn	0.935661	-2.27277	1.98156	-1.14696	0.251398
Dqx1	451.628	-0.26787	0.233592	-1.14674	0.251489
Fgf23	3.59471	1.20141	1.04824	1.14612	0.251745
Krt28	1.04207	1.88454	1.64439	1.14604	0.251777
Capza2	852.79	0.223832	0.19534	1.14586	0.251854
Tmem82	22.3396	0.582796	0.508746	1.14555	0.25198
Lgals8	45.1754	0.399841	0.349103	1.14534	0.252069
Htr2b	0.74467	2.56404	2.23894	1.1452	0.252125
Kri1	150.167	-0.276081	0.24114	-1.1449	0.252251
Adamts14	31.0441	-0.375944	0.328382	-1.14484	0.252276
Saxo1	2.27899	1.17115	1.0231	1.1447	0.252333
Pdk2	25.8762	-0.505386	0.441555	-1.14456	0.252392
Rps7	444.536	0.498161	0.435274	1.14448	0.252425
Man1c1	56.5552	-0.316688	0.276832	-1.14397	0.252635
Cyp2u1	2.18806	1.27615	1.11563	1.14389	0.252671
Mkln1os	1.86801	1.53595	1.34287	1.14378	0.252715
Anxa2	944.365	-0.323512	0.282972	-1.14327	0.252929
Fam111a	49.2232	-0.531605	0.465022	-1.14318	0.252962
Ssr3	1200.55	0.16228	0.142008	1.14276	0.253139
Inhbb	62.8686	-0.877288	0.767704	-1.14274	0.253145
Leprotl1	256.542	0.181574	0.15896	1.14226	0.253344
4921511C04Rik;AK014863	3.75455	-1.42481	1.24746	-1.14217	0.253384
AK054476	2.46862	1.11815	0.979034	1.14209	0.253415
Slc12a9	47.2143	0.279602	0.244861	1.14188	0.253503
Fam32a	397.15	0.169511	0.14846	1.1418	0.253539
Exoc3l4	7.19523	-0.764419	0.669516	-1.14175	0.253559
Cd19	1.06409	-1.90837	1.67153	-1.14169	0.253583
Lrrc8c	28.0976	-0.466415	0.40854	-1.14166	0.253594
Pygb	169.07	0.264557	0.231731	1.14166	0.253596
Gm15910	2.44854	1.60745	1.40806	1.1416	0.253619
Peg3	55.5579	-0.913411	0.800215	-1.14146	0.25368
Fbxo2	86.0735	-0.234825	0.205742	-1.14135	0.253723
Myrip	1.36152	1.99492	1.74832	1.14105	0.253849
Scnn1a	7.65261	-0.819224	0.717967	-1.14103	0.253856
AK215051;Rab1b	276.43	0.210731	0.184702	1.14092	0.253902
Rps27	72.2342	0.419636	0.367913	1.14059	0.254042
Pip5kl1	12.8271	0.930666	0.815971	1.14056	0.254052
3110039I08Rik	8.27727	-0.636075	0.557772	-1.14039	0.254126
Zak	53.1537	-0.372406	0.326566	-1.14037	0.254132
Trim56	2.84584	-1.49919	1.31504	-1.14003	0.254272
Anks6	3.70326	0.964116	0.845723	1.13999	0.25429
Rapgef3	35.0797	-0.57259	0.502399	-1.13971	0.254406
Lama3	60.9119	-0.792785	0.69576	-1.13945	0.254515
Fabp5	191.753	0.646246	0.567201	1.13936	0.254553
Naa20	228.143	0.415331	0.364539	1.13933	0.254564
AK077074;Trp53rkb	53.2166	0.390061	0.34238	1.13926	0.254593
Ing1	160.519	-0.224896	0.197406	-1.13925	0.254597
Adam23	294.554	-0.342387	0.300543	-1.13923	0.254609
AK154113;Kmt2e	84.7872	-0.342643	0.30077	-1.13922	0.254611
Sirpa	48.9471	0.426923	0.374846	1.13893	0.254733
1700013H16Rik	13.2137	1.27382	1.11893	1.13842	0.254944
Pcsk6	178.925	-0.677989	0.595651	-1.13823	0.255024
Btbd9	81.2228	-0.361856	0.317962	-1.13805	0.255101
Gcm2	0.855685	1.96154	1.72438	1.13753	0.255315
Tlx3	12.4704	0.746623	0.656502	1.13727	0.255424
Flt1	15.49	-0.563775	0.49583	-1.13703	0.255524
Metap1	357.696	0.200603	0.176456	1.13685	0.255603
Zbtb32	95.6553	-0.410935	0.361584	-1.13648	0.255754
Hgsnat	80.1393	0.278829	0.245346	1.13647	0.255758
AK079994;Trappc8	181.263	-0.262891	0.231339	-1.13639	0.255795
Fto	239.232	-0.245694	0.216239	-1.13621	0.255867
Hmga2-ps1	3.45256	0.879617	0.774267	1.13606	0.25593
Nobox	1.32893	1.63041	1.4352	1.13601	0.255951
2310015A10Rik	11.1387	-0.713389	0.628061	-1.13586	0.256015
Gm4262	6.61421	0.771745	0.679777	1.13529	0.256253
Mfap4	11.8235	-0.71576	0.630531	-1.13517	0.256304
Sugp2	105.445	-0.285436	0.251553	-1.1347	0.256503
Lrriq1	2.17646	-1.30097	1.14707	-1.13416	0.256725
Atp6v1g1	493.187	0.412537	0.363923	1.13358	0.25697
Tc2n	11.5684	0.594178	0.524208	1.13348	0.257014
Socs1	61.5723	0.279102	0.246239	1.13346	0.25702
Ncoa4	28.4425	-0.433072	0.382135	-1.1333	0.25709
Ppp1r3d	1.92415	-1.25448	1.10712	-1.1331	0.257173
Ing2	211.796	-0.203106	0.179264	-1.133	0.257214
Mir3094;Nfx1	488.61	0.1984	0.175144	1.13278	0.257305
Agfg2	57.3833	-0.411685	0.363598	-1.13225	0.257527
Rnf26	85.6185	0.245527	0.216979	1.13157	0.257815
Vpreb3	10.1705	-0.686684	0.606994	-1.13129	0.257935
Smoc1	149.57	0.316152	0.27947	1.13126	0.257947
Jmjd1c	297.837	-0.175842	0.155444	-1.13122	0.257961
Fam149a	16.0782	0.519658	0.459445	1.13106	0.258032
Gabrb1	3.0683	-1.19608	1.05775	-1.13077	0.25815
Ccl7	38.7801	0.5338	0.472079	1.13074	0.258163
Accn1/B830045N13Rik;Brinp3	0.93988	1.88695	1.6689	1.13066	0.258199
Spta1	7.53765	-1.08081	0.955925	-1.13065	0.258204
Nr6a1	110.002	-0.252255	0.223137	-1.13049	0.258269
Bend7	15.5355	0.756867	0.669561	1.13039	0.258311
Zfp595;Zfp953	44.4573	0.285594	0.252657	1.13036	0.258323
Mta3	764.037	-0.258515	0.228701	-1.13036	0.258324
Hnrnpf	520.312	0.299971	0.26543	1.13013	0.258421
Lsmem1	6.3207	0.691777	0.612135	1.13011	0.258432
Sptbn4	76.2565	-0.268532	0.237643	-1.12998	0.258484
Rpa3	1202.41	0.211473	0.187197	1.12968	0.258611
Chst12	113.427	-0.30401	0.269153	-1.12951	0.258684
Oasl2	4.8405	-0.853444	0.75562	-1.12946	0.258703
Epg5	44.7137	-0.41417	0.366892	-1.12886	0.258957
Nup155	271.323	-0.208481	0.184707	-1.12871	0.25902
Zfp653	48.5794	0.314896	0.279028	1.12854	0.25909
AK165532;Mob4	513.777	0.187192	0.165881	1.12847	0.25912
C2cd2;Mir6964	37.0031	-0.449787	0.398582	-1.12847	0.259122
Apobec1	61.1448	-0.368686	0.32682	-1.1281	0.259278
Bace2	1.10106	1.6429	1.45651	1.12797	0.259333
Cspg4	13.1071	-0.561213	0.49759	-1.12786	0.259378
Gstt3	58.1957	-0.391055	0.346774	-1.12769	0.259449
Ankar	0.607451	2.22918	1.97715	1.12747	0.259544
Eps8l1	3.06723	1.10074	0.976436	1.1273	0.259615
AK037264;Polr3g	222.742	-0.213792	0.189662	-1.12723	0.259645
Pycard	579.301	0.266994	0.23688	1.12713	0.259688
AK144662	7.14892	-0.799712	0.709701	-1.12683	0.259814
AK045688	0.900516	-2.00104	1.77614	-1.12662	0.259901
Yif1b	375.599	0.20047	0.177941	1.12661	0.259908
Mrps33	63.0069	0.31991	0.283983	1.12651	0.25995
Trappc10	88.5	-0.247902	0.220206	-1.12577	0.260261
BC025195	10.9643	-0.664938	0.590721	-1.12564	0.260318
Arap1	131.673	-0.190198	0.168996	-1.12546	0.260395
AK053246	3.41575	1.17195	1.0415	1.12525	0.260482
AK077979;Fdps	728.97	0.288614	0.256518	1.12512	0.260539
Mir704;Pdia4	536.527	0.291473	0.259103	1.12493	0.260618
AK184946;Rnf11	194.193	0.18518	0.164647	1.12471	0.260711
Sec14l2	54.4642	0.305776	0.271897	1.1246	0.260759
Slc4a7	254.838	-0.284809	0.253543	-1.12332	0.261304
Rpl23	3974.35	0.340558	0.303253	1.12302	0.261431
Ulk3	53.3749	-0.448226	0.399131	-1.12301	0.261435
AK082813	5.38408	1.47739	1.31627	1.12241	0.26169
Fezf1	0.938542	2.11044	1.8808	1.1221	0.261821
AK040752	2.92962	-0.928042	0.827223	-1.12188	0.261915
AK028583	30.9131	-0.508769	0.453509	-1.12185	0.261927
Npm3-ps1	525.815	-0.238643	0.212819	-1.12134	0.262141
Ubtd1	144.421	-0.223796	0.199713	-1.12059	0.262462
Exoc3	211.775	-0.196106	0.175002	-1.12059	0.262463
AK209582;Slc11a2	135.103	0.230218	0.20549	1.12034	0.262571
Brd4	389.709	-0.33844	0.302154	-1.12009	0.262675
AK171116;Laptm5	364.537	-0.618695	0.552365	-1.12008	0.262678
Lmtk2	217.373	-0.327649	0.292541	-1.12001	0.262711
AK020549;BC037763	2.59505	1.06478	0.950923	1.11973	0.262828
Dctn3	561.167	0.190653	0.170307	1.11947	0.262941
Gm14057	19.5682	0.498551	0.445407	1.11932	0.263005
Zfp652os	1.96037	-1.57981	1.41143	-1.1193	0.263013
Unc13d	61.8349	0.409077	0.36548	1.11929	0.263018
Ilk	166.381	0.257121	0.229763	1.11907	0.263109
AK038791	2.47029	1.10843	0.990647	1.1189	0.263184
Bex1	4977.44	0.147821	0.132172	1.1184	0.263397
Slc38a5	65.1161	-1.21407	1.08584	-1.11809	0.263528
Cramp1l	87.2936	-0.329928	0.295153	-1.11782	0.263644
Hnf1b	3.52442	-1.04652	0.936305	-1.11772	0.263688
Tnnc2	10.0302	0.776728	0.695083	1.11746	0.263797
Slc35c2	225.22	0.245535	0.219814	1.11701	0.263989
Slc22a23	13.206	0.651049	0.583388	1.11598	0.264431
Rps28	3012.04	-0.231679	0.207785	-1.115	0.264853
Tmem139	2.17805	1.39774	1.25463	1.11406	0.265251
Gcc1	44.448	0.285409	0.25624	1.11384	0.265349
Pde1a	6.7827	1.325	1.18962	1.11381	0.265363
Tmem47	109.3	-0.247924	0.222602	-1.11375	0.265386
Tmem253	6.4129	0.781602	0.70211	1.11322	0.265615
Pdha2	3.93785	1.03622	0.931153	1.11284	0.265778
A330048O09Rik	2.91851	-1.18179	1.0621	-1.1127	0.265839
Plk4	247.251	0.218482	0.19641	1.11238	0.265977
Spats2	10.413	-0.769156	0.691567	-1.11219	0.266055
AY512909	1.14841	2.34983	2.11315	1.112	0.266138
4632404H12Rik;AK040741	8.05689	-0.608915	0.547726	-1.11171	0.266261
Epb41l2	452.999	-0.224845	0.202324	-1.11131	0.266436
Marveld3	11.0715	-0.56295	0.506599	-1.11123	0.266468
Zfp758	13.614	-0.584866	0.526562	-1.11073	0.266686
Hecw2	45.7059	0.606072	0.545846	1.11034	0.266854
Hsd17b14	1091.14	-0.279119	0.251389	-1.11031	0.266867
Asap2	57.5993	-0.313708	0.282547	-1.11029	0.266875
Nlrc4	4.93816	-0.753895	0.679049	-1.11022	0.266903
Zfp112	3.73879	-1.17696	1.06019	-1.11014	0.266938
Ube2j1	105.809	0.202524	0.182468	1.10992	0.267034
H2-K2	13.4513	-0.741799	0.66838	-1.10985	0.267065
Mir6988;Syvn1	198.392	-0.323924	0.291926	-1.10961	0.267168
Aox1	2.13412	1.17745	1.06115	1.10959	0.267176
Atp12a	9.79099	0.760022	0.684972	1.10957	0.267186
Zg16	0.829074	-2.15774	1.94484	-1.10947	0.267228
Bcar3	151.808	-0.408097	0.367896	-1.10927	0.267312
Osbpl8	84.2472	-0.287032	0.258809	-1.10905	0.26741
9230116N13Rik	3.86016	-0.856195	0.772231	-1.10873	0.267547
Dnah10	8.18958	-0.588017	0.530388	-1.10866	0.267579
Cga	8.82486	0.626392	0.565051	1.10856	0.267621
Arid1b	116.121	-0.297417	0.268525	-1.10759	0.268038
Ermard	35.9115	-0.328872	0.296979	-1.10739	0.268125
Ovgp1	11.1322	-0.782178	0.706476	-1.10715	0.268227
Nt5c3	243.099	0.236199	0.213393	1.10687	0.268349
Jakmip3	0.802536	-2.02738	1.83179	-1.10677	0.268393
Gcc2	72.8171	-0.257288	0.232504	-1.1066	0.268468
Tspan33	35.0677	0.395338	0.357301	1.10646	0.268529
Uhrf1bp1	102.134	-0.262546	0.237292	-1.10643	0.268542
Polr2i	807.441	0.208394	0.188357	1.10638	0.268562
Mesp2	18.5403	-0.67658	0.611607	-1.10623	0.268625
Ptprk	121.896	-0.282656	0.255519	-1.10621	0.268638
Onecut2	4.25519	-0.841052	0.76061	-1.10576	0.26883
Edem3	118.151	-0.248648	0.22487	-1.10574	0.268838
Ski	284.32	-0.318303	0.288198	-1.10446	0.269393
Mapk8ip2	19.8391	0.483705	0.43802	1.1043	0.269464
Slc9b1	126.412	0.303654	0.275038	1.10404	0.269574
Slk	252.446	-0.217169	0.196737	-1.10385	0.269656
Zfp763	27.3307	-0.390466	0.353865	-1.10343	0.26984
AK139516	43.3238	-0.875117	0.793541	-1.1028	0.270114
Scai	47.1811	-0.311609	0.282608	-1.10262	0.270194
Gm16023	0.575296	-2.56724	2.3301	-1.10177	0.270562
AK088651;Glcci1;Umad1	48.2073	0.393958	0.357572	1.10176	0.270566
Mfsd6l	0.604925	-2.61344	2.37228	-1.10166	0.27061
Pus7	325.332	-0.205552	0.186603	-1.10155	0.270659
Fthl17-ps1	2.22199	1.85328	1.68273	1.10135	0.270743
Map10	17.8757	-0.480062	0.435962	-1.10116	0.270829
Myom2	2.11159	1.16514	1.05817	1.10109	0.270859
Crlf2	564.97	0.237992	0.216198	1.10081	0.270981
Tbc1d9	32.5919	0.732037	0.665042	1.10074	0.271011
Noa1	311.751	-0.204847	0.186164	-1.10036	0.271174
Fam3b	3.59393	0.979581	0.890397	1.10016	0.271262
Gm15915	6.92379	-0.810055	0.736344	-1.1001	0.271287
Rfxank	55.4501	0.332034	0.301892	1.09984	0.271401
Mir103-2	0.541789	2.70145	2.45683	1.09957	0.271521
Lsm7	66.807	-0.248293	0.22588	-1.09922	0.271671
Sun3	1.09932	-1.86372	1.6956	-1.09915	0.271701
Fads1;Mir6993	451.239	-0.230974	0.210165	-1.09901	0.271763
Slc25a42	25.8116	-0.433205	0.394449	-1.09826	0.272093
Tmem132e	0.629227	-2.61874	2.38477	-1.09811	0.272156
Dip2c	45.1546	0.342207	0.311635	1.0981	0.27216
N4bp2	20.2301	-0.601286	0.547584	-1.09807	0.272174
TRNA_Gln	14.1343	0.713274	0.64969	1.09787	0.272262
Ret	14.1174	0.501191	0.456586	1.09769	0.272339
Rhox1	52.0384	0.94374	0.86016	1.09717	0.272568
Plod2	521.007	-0.292567	0.266805	-1.09656	0.272834
Gm6093	1.8045	-1.62184	1.47904	-1.09655	0.272838
Hist1h1b	13.3191	-0.66014	0.602029	-1.09653	0.272849
Cntd1	25.4773	-0.549595	0.501217	-1.09652	0.272851
Slc39a1	51.5553	0.56457	0.515043	1.09616	0.273008
Ube2w	135.376	0.187824	0.17138	1.09595	0.273099
Vps13a	81.9821	-0.252423	0.230362	-1.09577	0.27318
Platr26	64.2548	-0.370933	0.338779	-1.09491	0.273555
AK205703	1.44311	-1.47021	1.34301	-1.09471	0.273643
Tmem107	209.097	0.217938	0.199233	1.09389	0.274004
Shisa8	38.6282	-0.818033	0.748148	-1.09341	0.274214
AK018940	8.19813	-0.804227	0.735752	-1.09307	0.274363
Shcbp1l	6.05364	-0.73252	0.670405	-1.09265	0.274547
Cenpj	52.7964	-0.525944	0.481357	-1.09263	0.274558
Lias	337.388	-0.295421	0.27046	-1.09229	0.274704
Shroom3	133.389	-0.230339	0.210879	-1.09228	0.274709
Gm13889	17.2266	0.466947	0.42751	1.09225	0.274724
AU018091	598.339	-0.149022	0.136441	-1.09221	0.274742
Ndufaf4	356.63	0.251231	0.230032	1.09216	0.274764
Morn4	92.3909	-0.243731	0.22321	-1.09193	0.274863
Zbtb4	14.7352	-0.546728	0.500785	-1.09174	0.274946
Spa17	30.503	-0.647006	0.592834	-1.09138	0.275107
9430038I01Rik	156.1	0.230446	0.211172	1.09127	0.275154
Por	426.393	-0.272209	0.24949	-1.09106	0.275247
Oprd1	0.872	-1.97458	1.81004	-1.0909	0.275315
Sema3c	17.0605	-0.472301	0.432993	-1.09078	0.275368
2310001H17Rik	4.53667	-0.788601	0.72309	-1.0906	0.275449
Bcl11b	16.4117	0.814128	0.746809	1.09014	0.275651
Lag3	35.3632	0.769709	0.706674	1.0892	0.276066
Cldn1	1.22829	1.51886	1.39537	1.08849	0.276377
Col6a6	3.64954	-1.34013	1.23162	-1.0881	0.276549
AK168915	11.0072	0.642645	0.590613	1.0881	0.276552
Gm6548	48.5329	-0.284387	0.261365	-1.08808	0.276558
Snx13	82.7845	0.248447	0.228361	1.08796	0.276613
Pacrgl	92.1586	0.346023	0.318105	1.08777	0.276699
Slc16a4	1.92948	1.22674	1.12781	1.08772	0.27672
Utp18	722.88	0.215736	0.19839	1.08744	0.276844
Psmd8	1527.31	0.108392	0.0996796	1.08741	0.276857
Sh2d2a	1.41091	1.6465	1.51505	1.08676	0.277143
Fcna	0.537673	2.66866	2.45612	1.08654	0.277241
Hpgds	0.537673	2.66866	2.45612	1.08654	0.277241
Prodh2	1.12804	1.73576	1.59833	1.08598	0.277486
Spata33	7.57469	-0.606415	0.558463	-1.08587	0.277539
Exosc4	346.893	0.231096	0.21284	1.08577	0.27758
Ankrd37	293.317	-0.549655	0.506261	-1.08571	0.277605
0610009O20Rik	124.997	-0.234973	0.216427	-1.08569	0.277615
Ccdc191	61.8494	-0.282721	0.260406	-1.08569	0.277616
Cobl	393.462	-0.564246	0.519785	-1.08554	0.277684
AK039581	0.784813	2.56719	2.36501	1.08549	0.277706
Prrxl1	2.77828	-0.941113	0.867083	-1.08538	0.277754
AK157890;Nmd3	1080.52	0.192235	0.177163	1.08508	0.277888
Adra2a	3.01211	-0.971936	0.896989	-1.08355	0.278562
AK041721;Rsf1os2	1.43333	1.34683	1.24325	1.08331	0.27867
AK053029;Thra	72.185	-0.337737	0.312023	-1.08241	0.27907
Alad	181.181	0.268686	0.248252	1.08231	0.279114
Aaed1	36.3047	0.487956	0.450896	1.08219	0.279168
Ttc8	45.8549	0.385063	0.355823	1.08218	0.279174
Mtss1l	77.4023	-0.297449	0.27489	-1.08206	0.279225
Ahsa2	247.684	0.192856	0.178278	1.08177	0.279354
LOC102640359	2.71257	1.4446	1.33574	1.0815	0.279475
Mid2	4.39455	0.838984	0.7758	1.08144	0.2795
Adm	51.2394	-0.576045	0.532864	-1.08104	0.279681
Abcb6	60.815	0.280142	0.259161	1.08096	0.279716
Ctla2b	1.12693	-1.92043	1.77666	-1.08092	0.279731
Cth	694.194	-0.26587	0.245978	-1.08087	0.279755
Hpx	3.7913	-0.916058	0.847648	-1.08071	0.279828
Egf	3.63831	-1.01987	0.943824	-1.08058	0.279885
AK158286	1.0655	1.87152	1.73226	1.08039	0.27997
AK017177	0.879051	1.80894	1.67469	1.08016	0.280071
Prom2	4.89709	1.0344	0.957849	1.07992	0.280177
Uncx	0.899907	2.07229	1.91909	1.07983	0.280219
Bean1	5.80429	-0.838159	0.776269	-1.07973	0.280264
BC034090	7.7596	-0.568165	0.526227	-1.0797	0.280278
Hoxd3;Hoxd4	0.706007	-1.9618	1.81727	-1.07953	0.280351
Lpin1	217.993	-0.39427	0.365329	-1.07922	0.28049
4933439C10Rik	28.7215	-0.439946	0.407714	-1.07906	0.280563
Mri1	360.572	0.283201	0.262574	1.07855	0.280786
Cidea	48.111	0.389716	0.361364	1.07846	0.280829
AK077163	19.8415	-0.588511	0.545787	-1.07828	0.280909
Fignl2	47.9321	-0.62088	0.575807	-1.07828	0.28091
Lypla2	379.101	0.195073	0.180967	1.07795	0.281057
Actr3b	122.926	-0.390777	0.362568	-1.0778	0.281122
Polr2a	732.038	-0.232602	0.215838	-1.07767	0.281183
Cnrip1	8.85512	0.672722	0.624414	1.07736	0.281318
Hoxc5	1.09697	-1.72587	1.60227	-1.07714	0.281419
Sema3d	3.22216	-0.999114	0.92862	-1.07591	0.281966
Scrn1	59.1284	0.384017	0.356952	1.07582	0.282006
Pkmyt1	270.566	-0.209669	0.194959	-1.07545	0.282173
Plekhf1	59.9386	-0.370054	0.344128	-1.07534	0.282223
Mapk15	14.5975	-0.430536	0.400374	-1.07533	0.282225
Ehbp1	43.9418	-0.291682	0.271299	-1.07513	0.282316
Sv2c	1.17729	-1.45265	1.35162	-1.07475	0.282488
Yipf7	0.932897	-1.66511	1.5496	-1.07454	0.282581
Ccdc186	5.71455	-0.800829	0.745431	-1.07432	0.282681
Setx	702.783	-0.193949	0.180577	-1.07405	0.2828
Mrpl51	543.018	0.211953	0.197379	1.07384	0.282896
Diaph3	15.0121	-0.439587	0.40946	-1.07358	0.283012
1110008F13Rik	1106.57	0.225245	0.209827	1.07348	0.283056
Lrrc14	49.4718	0.499179	0.465081	1.07331	0.28313
Gareml	22.4006	-0.496237	0.462381	-1.07322	0.283171
Amt	0.86529	1.70834	1.593	1.07241	0.283537
AK048887;Xpr1	84.3094	-0.269425	0.251299	-1.07213	0.283662
Rgs5	2.95175	-0.953487	0.889359	-1.07211	0.283672
Bckdha	347.721	-0.319389	0.297933	-1.07202	0.283712
Ube2q1	600.716	0.178124	0.166206	1.07171	0.283852
Erdr1	1104.37	-0.650037	0.606656	-1.07151	0.283941
Gna11	248.567	0.19839	0.185159	1.07146	0.283965
Bmp4	219.026	-0.357091	0.333277	-1.07145	0.283966
Slc38a3	39.6895	-0.428094	0.399651	-1.07117	0.284093
Sec61a2	244.955	-0.235807	0.22014	-1.07117	0.284094
AK045943;Upf2	112.73	-0.189989	0.17738	-1.07109	0.284129
Zfp879	1.92184	-1.24366	1.1612	-1.07101	0.284165
Acer1	16.4831	-0.714311	0.667395	-1.0703	0.284485
Ccdc107	163.534	0.246228	0.230067	1.07024	0.284509
Rtfdc1	302.873	0.180377	0.168584	1.06995	0.284641
Sf3b5	1345.38	0.191296	0.178795	1.06992	0.284657
AK002748	1.16872	1.54115	1.44106	1.06945	0.284866
Pcolce	852.938	-0.332812	0.311205	-1.06943	0.284876
Csnk1e	641.354	-0.260761	0.243834	-1.06942	0.28488
Casp12	17.7901	0.828117	0.774387	1.06938	0.284897
Ube2l6	17.2285	-0.550168	0.514512	-1.0693	0.284935
Crygn	10.2868	-0.562276	0.525884	-1.0692	0.284979
Sdc1	202.747	-0.195294	0.182764	-1.06856	0.28527
Atp2a3	12.5413	-0.899758	0.842038	-1.06855	0.285273
Vstm5	14.4683	-0.486207	0.45517	-1.06819	0.285436
Ly6g6d	49.2527	-0.351387	0.329052	-1.06788	0.285577
Ano3	22.5462	-0.650321	0.609157	-1.06758	0.285712
C430002N11Rik	3.84616	0.916071	0.858349	1.06725	0.28586
4632428C04Rik	1.40179	-1.56055	1.46238	-1.06713	0.285914
AK141396	4.54339	-1.10451	1.03508	-1.06708	0.285936
Ache	2.43976	1.12232	1.05192	1.06693	0.286005
Hmgcs2	1.54967	1.24802	1.17039	1.06633	0.286277
Xrcc4	84.1366	0.269967	0.253194	1.06625	0.286313
Hesx1	56.1925	0.326263	0.306118	1.06581	0.286511
Smad1	57.0507	-0.432267	0.405648	-1.06562	0.286595
Zfp39	17.1813	-0.52799	0.495485	-1.0656	0.286603
Ptprb	1.12107	1.51067	1.41816	1.06523	0.286771
Kbtbd11	7.21158	-0.598897	0.562237	-1.06521	0.286783
AK030697;AK031070;Mtpap	233.116	-0.225292	0.211522	-1.0651	0.286833
Clic1	581.734	-0.255621	0.240115	-1.06457	0.287068
Marcksl1-ps4	1.27626	1.49573	1.40501	1.06457	0.28707
Tecr	1602.7	-0.176009	0.165414	-1.06405	0.287304
Fkbp10	123.273	-0.402863	0.378736	-1.06371	0.287462
Mthfsd	45.6336	0.356867	0.335523	1.06361	0.287504
Pola2	280.035	-0.234917	0.220918	-1.06337	0.287615
Peg12	18.5702	0.80753	0.75957	1.06314	0.287718
Dact2	111.834	-0.265715	0.249976	-1.06296	0.287799
Ust	4.33626	-0.807446	0.759841	-1.06265	0.28794
Itpr2	5.84521	0.649665	0.611515	1.06239	0.28806
Cacna1a	312.29	-0.385964	0.363431	-1.062	0.288235
Mospd4	1.07153	-1.73716	1.63577	-1.06198	0.288243
Ldhal6b	8.67035	-1.03737	0.976936	-1.06186	0.288298
Nedd8	1786.92	0.197502	0.186017	1.06174	0.288352
Sh3bgrl3	580.328	-0.214071	0.201633	-1.06169	0.288378
Hs3st6	11.8267	-0.647932	0.610352	-1.06157	0.288431
Trnt1	225.427	0.366601	0.345406	1.06136	0.288526
Polr2e	1767.35	0.171581	0.161665	1.06134	0.288536
Dmrt1	96.4679	-0.698538	0.658469	-1.06085	0.288757
Mir3076;Tkt	2683.31	-0.189114	0.178297	-1.06067	0.288841
Vgll1	1.54823	1.45253	1.36951	1.06062	0.288863
C3;Mir6978	6.31209	-0.841511	0.793767	-1.06015	0.289077
Tbcel	109.63	-0.29968	0.282695	-1.06008	0.289107
Bst1	4.95835	-0.858239	0.809738	-1.0599	0.289192
Hivep1	24.9642	-0.424302	0.400379	-1.05975	0.289258
Kcng4	2.09972	-1.14638	1.08186	-1.05964	0.289307
Zfp607	25.4858	0.317023	0.299191	1.0596	0.289327
Frmd3	0.871399	-2.16281	2.04128	-1.05954	0.289356
Cdh6	15.787	-0.781013	0.7373	-1.05929	0.289469
AK039178;Elf2	183.118	0.219391	0.207118	1.05926	0.289483
1700012C14Rik	7.07134	0.606074	0.572172	1.05925	0.289485
Hydin	13.8325	-0.513161	0.484765	-1.05858	0.289792
Carnmt1	41.3472	-0.445563	0.420973	-1.05841	0.289868
Copa	542.837	-0.156976	0.148324	-1.05833	0.289903
Mir7118;Plxnb2	308.245	-0.200451	0.189415	-1.05827	0.289934
Xaf1	50.2577	-0.507175	0.479382	-1.05798	0.290066
Spata7	57.3944	0.288173	0.272434	1.05777	0.29016
Apcdd1	46.265	0.629927	0.59585	1.05719	0.290424
Zfp871	89.5922	-0.329636	0.311818	-1.05714	0.290447
Mirlet7d	1.14035	1.4634	1.38443	1.05704	0.290492
Lsm8	1017.87	0.334529	0.316594	1.05665	0.290672
Kbtbd8	74.8383	0.287717	0.272335	1.05648	0.290748
Lsp1	18.7486	-0.420615	0.398197	-1.0563	0.290832
Ints12	235.84	0.266808	0.252621	1.05616	0.290896
Clasrp	185.155	-0.22128	0.209593	-1.05576	0.291077
Snora69	15.2095	-0.845321	0.8007	-1.05573	0.291093
Gdpd5	21.0155	-0.574564	0.544597	-1.05503	0.291413
AK041001;Rsbn1l	200.842	-0.258757	0.245263	-1.05502	0.291416
Wsb1	722.222	0.290659	0.275505	1.05501	0.291423
Smad7	492.664	-0.343622	0.325734	-1.05492	0.291464
Shox2	2.77586	1.08889	1.03249	1.05463	0.291597
Syt14	27.6169	0.338228	0.320927	1.05391	0.291925
Rad51ap1	206.176	0.381376	0.362043	1.0534	0.292159
Fam104a	564.496	0.156775	0.148879	1.05304	0.292324
Eif1a	1500.49	-0.316647	0.300749	-1.05286	0.292405
Zfp791	3.22399	-0.868502	0.824963	-1.05278	0.292443
Fam169b	55.7457	0.5351	0.508365	1.05259	0.29253
Epx	37.0153	0.745635	0.708586	1.05229	0.292668
Arhgef17;Mir3102	83.3229	-0.269693	0.256339	-1.05209	0.292757
Iqca	11.4038	0.711638	0.67654	1.05188	0.292855
Arhgef40	36.6732	-0.309026	0.293808	-1.0518	0.292894
Tsga10	12.2095	0.497527	0.473072	1.05169	0.29294
Habp4	32.2521	0.492647	0.468634	1.05124	0.293149
Psme1	542.154	-0.176463	0.167882	-1.05112	0.293205
Sfrp5	13.1115	-0.508557	0.483826	-1.05111	0.293206
Krba1	104.809	0.274998	0.261681	1.05089	0.29331
Gm853	3.81723	-0.956467	0.910233	-1.05079	0.293354
Pcid2	33.8629	0.360272	0.342876	1.05073	0.293381
Adam8;Mir7062	16.3513	-0.506388	0.481955	-1.0507	0.293398
Mterf1b	8.32347	-0.629096	0.598945	-1.05034	0.293562
Pura	333.271	-0.728631	0.694013	-1.04988	0.293773
Ap5b1	4.6069	0.794076	0.756381	1.04984	0.293794
Adgb	0.71564	-1.8854	1.79661	-1.04942	0.293986
Pnpla5	0.71564	-1.8854	1.79661	-1.04942	0.293986
Lypd3	3.89656	1.09627	1.04493	1.04914	0.294114
AK020853;Hip1	133.962	0.416444	0.39711	1.04869	0.294323
Ptafr	1.79498	1.51275	1.44377	1.04778	0.29474
Stk33	4.86285	0.994756	0.949543	1.04762	0.294816
Commd3	180.022	0.242962	0.231929	1.04757	0.294838
Osr1	10.8916	-0.668596	0.638287	-1.04748	0.294876
Alpk2	0.473404	2.59029	2.47313	1.04738	0.294926
Carm1	572.612	-0.22984	0.21954	-1.04691	0.295139
3300005D01Rik	3.51582	1.08167	1.03382	1.04628	0.295432
1700003M07Rik	7.46276	0.796585	0.761531	1.04603	0.295547
AK053432;Apaf1	107.563	-0.288465	0.275795	-1.04594	0.295588
Ift140	85.5065	-0.216083	0.20668	-1.04549	0.295796
Psma8	103.758	-0.282686	0.270411	-1.04539	0.295841
D10Wsu102e	173.872	0.353733	0.338502	1.04499	0.296026
Fkbp15	131.528	0.323629	0.309915	1.04425	0.296369
Txnrd2	46.2364	0.391592	0.375002	1.04424	0.296374
Ssna1	433.372	0.217267	0.208074	1.04418	0.296402
Ttk	238.231	-0.202432	0.193919	-1.0439	0.296531
AK218851;Pskh1	79.8526	-0.329075	0.315316	-1.04363	0.296655
1810034E14Rik	0.710577	-1.87392	1.79584	-1.04348	0.296726
Ptpn7	36.7969	-0.622055	0.596269	-1.04325	0.296835
Snrpe	2037.68	0.286619	0.274814	1.04296	0.296968
Dph3	764.21	0.192816	0.1849	1.04282	0.297034
Gm2518	1.97769	1.38866	1.33213	1.04244	0.297206
Rita1	91.5611	-0.238411	0.228772	-1.04213	0.297351
Paqr6	0.841837	1.66921	1.60177	1.0421	0.297364
Lmx1a	1.71648	1.23877	1.18874	1.04209	0.297371
Tex30	457.125	0.188247	0.180647	1.04207	0.297379
Lrrc42	280.823	0.165568	0.158914	1.04187	0.297471
Scel	1.02567	1.58982	1.52613	1.04174	0.297533
Nos2	1.89959	-1.49025	1.43119	-1.04127	0.297751
C030039L03Rik	18.555	0.388487	0.373125	1.04117	0.297796
Adrb2	17.7566	-0.647757	0.622353	-1.04082	0.297959
Ndufb6	1240.57	0.16002	0.153756	1.04074	0.297997
Zfp592	100.939	-0.21678	0.208301	-1.04071	0.298011
Esyt3	44.4449	-0.313075	0.300837	-1.04068	0.298024
Zfp873	12.8474	0.4265	0.410098	1.03999	0.298342
Ccdc13	3.39123	1.01035	0.971643	1.03984	0.298415
AK046440	0.730638	2.40347	2.31149	1.03979	0.298436
Itga5;Mir6963	102.91	-0.509124	0.489688	-1.03969	0.298484
AI467606	30.3738	-0.422311	0.40636	-1.03925	0.298687
DQ727037	0.580267	1.92473	1.85229	1.03911	0.298753
Homer3	118.279	0.273732	0.263515	1.03877	0.298911
BC054353	25.6737	-0.458997	0.441879	-1.03874	0.298926
Sh2d4a	6.10655	0.786691	0.757589	1.03841	0.299078
Dok2	42.526	-0.339377	0.326867	-1.03827	0.299143
Stx18	95.3298	0.269488	0.259632	1.03796	0.299288
Vstm2l	20.6297	-0.538733	0.519194	-1.03763	0.299441
Ergic3	358.716	0.238129	0.229516	1.03753	0.299491
Mphosph6	399.185	0.206995	0.199557	1.03728	0.299607
Tomm22	1132.92	0.199741	0.19265	1.0368	0.299827
Praf2	302.77	0.457731	0.441554	1.03664	0.299905
Ccnb1	1542.06	0.228567	0.220492	1.03662	0.299912
AK084081	0.654794	2.15076	2.07496	1.03653	0.299956
Nefl	65.1088	0.489793	0.472532	1.03653	0.299956
Adcyap1r1	7.49747	0.681041	0.657113	1.03641	0.300009
Zdhhc2	28.2521	0.33702	0.325231	1.03625	0.300086
Il3ra	19.2742	0.351032	0.338806	1.03608	0.300163
Rest	195.708	-0.6464	0.623988	-1.03592	0.300241
Gsc	11.2004	0.635758	0.614081	1.0353	0.300528
Kif1c;Mir6925	86.1348	-0.223375	0.215768	-1.03526	0.30055
Plaa	872.178	0.18548	0.179165	1.03525	0.300554
Agpat2	267.844	0.148157	0.143119	1.0352	0.300575
Grtp1	357.732	-0.239958	0.231867	-1.03489	0.300718
Cisd3	200.325	-0.313898	0.303415	-1.03455	0.300879
Ubr2	187.819	-0.230354	0.222672	-1.0345	0.300902
Cnot1;Mir7073	627.32	-0.153907	0.14878	-1.03446	0.300919
Slc12a3	2.40826	1.43132	1.38373	1.03439	0.300953
Amigo2	17.1696	0.478093	0.462303	1.03416	0.301064
Lpin3	49.7602	0.374543	0.362447	1.03337	0.30143
DQ710812	1.18248	-1.52355	1.4747	-1.03312	0.301547
Hoxc8	12.6074	-0.461296	0.446622	-1.03286	0.301671
Tsc2	260.832	-0.393809	0.381372	-1.03261	0.301785
AK200837	26.8043	0.429331	0.415784	1.03258	0.301799
Tmbim6	1204.12	-0.228357	0.221267	-1.03205	0.302051
Ston2	93.3374	0.300002	0.290708	1.03197	0.302087
AK030382;Per3	11.942	0.657293	0.637063	1.03176	0.302187
Vegfa	349.689	-0.376396	0.364886	-1.03155	0.302285
Kcnk3	4.91418	-1.27175	1.23315	-1.0313	0.302401
AK031816;AK141638;AK165889	1.56258	-2.1016	2.03789	-1.03126	0.302417
AK029591	1.11948	-1.63951	1.58986	-1.03123	0.302434
Kdsr	195.325	0.223043	0.216356	1.03091	0.302585
AK043439	3.58284	0.98771	0.95842	1.03056	0.302747
Dock4	6.51231	0.718288	0.697024	1.03051	0.302772
Napepld	113.206	-0.38905	0.377551	-1.03046	0.302796
Ccnk	435.759	-0.243476	0.236325	-1.03026	0.302888
Lonp2	215.696	-0.159054	0.154384	-1.03025	0.302893
Rnf165	90.5703	-0.429247	0.416644	-1.03025	0.302894
Zfp59	25.5464	0.468661	0.45498	1.03007	0.302977
Fcer1g	6.09241	0.699662	0.679259	1.03004	0.302992
Cacng2	3.57545	-1.30191	1.2641	-1.02991	0.303052
Oas1b	2.55048	-1.35927	1.31986	-1.02986	0.303073
A630023A22Rik	8.26751	-1.33441	1.29578	-1.02981	0.303098
Ntrk1	27.3144	0.478046	0.464233	1.02976	0.303125
Klhl20	79.0706	0.199926	0.194217	1.0294	0.303294
AK158346;Snrpd2	1941.93	0.349609	0.339641	1.02935	0.303317
4632415L05Rik	17.1297	0.434933	0.422535	1.02934	0.303319
Pex5l	0.95206	-2.1231	2.06288	-1.02919	0.303388
Stard3nl	310.315	0.187512	0.182214	1.02907	0.303446
Stat4	34.9206	-0.400108	0.388893	-1.02884	0.303555
Grm8;Mir592	0.556866	2.10768	2.04927	1.0285	0.303714
Ankrd11	275.402	-0.583295	0.567365	-1.02808	0.303913
AK087906;Myo15b	23.963	-0.483951	0.470791	-1.02795	0.303971
G2e3	344.319	-0.310949	0.302507	-1.02791	0.303993
Gnat1	3.15228	0.890076	0.865919	1.0279	0.303998
Ndst2	30.3531	-0.316743	0.308148	-1.02789	0.304001
Tfap2a	10.1879	-0.576203	0.560588	-1.02785	0.304019
8430430B14Rik	11.7252	-0.652016	0.635139	-1.02657	0.304622
Crybb3	21.2575	0.560133	0.545735	1.02638	0.30471
A630089N07Rik	7.44475	0.568788	0.554175	1.02637	0.304717
Tmem91	13.5176	-0.555034	0.540838	-1.02625	0.304774
Mir124a-1;Mir124a-1hg;Mir3078	6.64414	-1.02187	0.996202	-1.02577	0.305002
Zfp69	16.42	-0.46095	0.449376	-1.02575	0.305007
BC021767	9.53577	0.853081	0.831917	1.02544	0.305156
Cacna2d3	1.13786	1.62108	1.5818	1.02483	0.305442
1700040L02Rik	0.512547	-2.24271	2.18865	-1.0247	0.305506
AB349811	0.512547	-2.24271	2.18865	-1.0247	0.305506
BC132257	0.512547	-2.24271	2.18865	-1.0247	0.305506
BC075659	3.64385	-0.944154	0.921469	-1.02462	0.305544
Tmem50b	110.759	0.189499	0.185002	1.0243	0.305692
Dkk2	13.9115	-0.580724	0.567055	-1.02411	0.305786
Fam83a	5.97669	0.917002	0.895513	1.024	0.305837
Ahcyl2	124.185	0.327496	0.319833	1.02396	0.305855
Sox4	76.9629	-0.450581	0.440054	-1.02392	0.305872
Map2k3os	53.4222	-0.330198	0.322542	-1.02374	0.30596
Ppm1j	165.08	-0.323961	0.316494	-1.02359	0.306028
Cactin	215.782	0.236252	0.23081	1.02358	0.306034
Bckdk	360.571	0.199797	0.195197	1.02357	0.30604
2810428I15Rik	572.758	0.252631	0.246822	1.02353	0.306055
Clec14a	3.59254	-0.86772	0.847788	-1.02351	0.306067
4931428F04Rik	61.4191	-0.398039	0.388929	-1.02342	0.306108
AI481877	6.60536	0.662525	0.647462	1.02326	0.306183
Mir7011;Sema4a	54.4101	-0.300642	0.293878	-1.02302	0.306299
Fam216a	305.407	-0.311696	0.304698	-1.02297	0.306323
Tmem60	336.371	-0.318791	0.311882	-1.02215	0.306709
Teddm3	1.18148	-1.50214	1.4696	-1.02214	0.306714
Map3k10	99.7904	-0.305229	0.298621	-1.02213	0.306721
AK049951	4.28161	0.941458	0.921153	1.02204	0.30676
AK047455;AK080083;Mib1	177.97	-0.266998	0.261281	-1.02188	0.306837
Bend5	25.6506	0.402127	0.393537	1.02183	0.306862
AK048595	7.70278	0.526983	0.515738	1.0218	0.306874
1300002E11Rik	52.6153	0.267838	0.262226	1.0214	0.307064
Eva1a	14.6073	0.570399	0.558448	1.0214	0.307065
Atxn2	444.973	-0.385991	0.377917	-1.02136	0.307082
D130020L05Rik	10.4733	-0.489896	0.479659	-1.02134	0.307093
Clcn7	98.7713	-0.244705	0.239594	-1.02133	0.307097
Ndufv1	746.552	-0.142909	0.139961	-1.02107	0.307223
Smarcd1	568.272	-0.153639	0.150477	-1.02101	0.307248
Pwwp2a	198.383	-0.305423	0.299142	-1.021	0.307256
Dyrk1b	41.7527	0.439141	0.430343	1.02044	0.307519
Dhrs3	15.0582	-0.580534	0.568958	-1.02034	0.307565
Mir7067;Rpl18a	934.785	0.312738	0.306568	1.02013	0.307669
Abhd2	18.3085	-0.428718	0.4203	-1.02003	0.307715
Bmp15	0.880859	-2.11128	2.06984	-1.02002	0.307719
[truncated: 28,325 more rows]

## Sheet: weight_pairwise_stats
age	comparison	n1	n2	mean.group1	mean.group2	p	p.adj	signif
4 Weeks	het vs WT	4	7	13.5	15.1014	0.137	0.41	ns
4 Weeks	KO vs het	7	7	15.1014	8.62286	2.02e-06	6.06e-06	***
4 Weeks	KO vs WT	4	7	13.5	8.62286	0.000239	0.000718	***
7 Weeks	het vs WT	4	6	18.4575	20.9467	0.0501	0.15	ns
7 Weeks	KO vs het	6	5	20.9467	14.508	6.18e-05	0.000185	***
7 Weeks	KO vs WT	4	5	18.4575	14.508	0.00606	0.0182	*
