# Supplementary material for: Reciprocal, methylation-dependent binding of Zfp57 and Gzf1 safeguards Dlk1-Dio3 imprinting during developmental reprogramming
Source: Research Square preprint supplement (doi:10.21203/rs.3.rs-7243168/v1), 2025-09-22
Supplement: Supplementary file 7 [file 855d1674765f19cd43c20287.xlsx]

## Sheet: new_hits
chrom	start	end	type	cg	gc	V65_ctrl_flag	V65_Gzf1OE_flag	RGM_ctrl_flag	RGM_Gzf1OE_flag	Cas9_ctrl_Gzf1	Cas9_ko_Gzf1	atac_mar	type_v6	geneSymbol	refseq	protAcc	description	rfamAcc	tRnaName	dist
chr6	127252200	127252500	hit	0.01	0.832	18.1	384.1	12.6	288.4	27.2	14.7	12481	hit	D130058E03	NR_073373		Mus musculus uncharacterized D130058E03 (D130058E03), long non-coding RNA.			55466
chr11	62846890	62847190	hit	0.02	0.662	17.45	293.55	4	262.75	39.55	25.2	2497	hit	Fbxw10	;NM_001033669;NM_001291441	;NP_001028841;NP_001278370	Mus musculus F-box and WD-40 domain protein 10 (Fbxw10), transcript variant 1, mRNA.;Mus musculus F-box and WD-40 domain protein 10 (Fbxw10), transcript variant 2, mRNA.			0
chr8	78508990	78509290	hit	0.17	1.022	14	276.5	6.95	254.9	26	23.9	34205	hit	Slc10a7	NM_001009981;NM_001282108;NM_001282109;NM_029736;NR_104094	;NP_001009981;NP_001269037;NP_001269038;NP_084012	Mus musculus solute carrier family 10 (sodium/bile acid cotransporter family), member 7 (Slc10a7), transcript variant a, mRNA.;Mus musculus solute carrier family 10 (sodium/bile acid cotransporter family), member 7 (Slc10a7), transcript variant b, non-coding RNA.;Mus musculus solute carrier family 10 (sodium/bile acid cotransporter family), member 7 (Slc10a7), transcript variant c, mRNA.;Mus musc…			-37
chr2	172796980	172797280	hit	0.018	0.662	8	265.65	2	204.45	13.55	13.9	1794	hit	BC116387			Mus musculus cDNA clone IMAGE:40101788.			-65149
chr4	80910430	80910730	hit	0.046	0.676	13.8	259.35	5.7	241.15	28.5	11	4167	hit	Lurap1l	NM_026821	NP_081097	Mus musculus leucine rich adaptor protein 1-like (Lurap1l), mRNA.			0
chrX	77508970	77509270	hit	0.032	0.702	17.8	251.7	7	237.35	31.1	16.95	7665	hit	Tbl1x	NM_020601	NP_065626	Mus musculus transducin (beta)-like 1 X-linked (Tbl1x), mRNA.			-1956
chr6	101378090	101378390	hit	0.088	0.904	4.5	249.75	9.15	293.1	35.65	16.9	24839	hit	Pdzrn3	;NM_018884	;NP_061372	Mus musculus PDZ domain containing RING finger 3 (Pdzrn3), mRNA.			-193
chr6	34709050	34709350	hit	0.032	0.794	9.75	249.55	10	311.5	47	10.75	9700	hit	Cald1	NM_145575	NP_663550	Mus musculus caldesmon 1 (Cald1), mRNA.			-93
chr5	147874550	147874850	hit	0.05	0.784	28.3	247.3	5.3	208.7	10.7	8.3	419	hit	Pomp	;NM_025624	;NP_079900	Mus musculus proteasome maturation protein (Pomp), mRNA.			13922
chr15	48789610	48789910	hit	0.066	0.748	18.6	246.3	5.55	208.85	21	19.3	4486	hit	Csmd3	;NM_001081391	;NP_001074860	Mus musculus CUB and Sushi multiple domains 3 (Csmd3), mRNA.			2078
chr3	122983810	122984110	hit	0.098	0.894	23.1	244.85	10.85	240.35	28.75	22	18083	hit	Usp53	;NM_133857	;NP_598618	Mus musculus ubiquitin specific peptidase 53 (Usp53), mRNA.			336
chr14	105676330	105676630	hit	0.026	0.624	8.75	241.65	2	202.05	13.55	10	1986	hit	AK045385			Mus musculus adult male corpora quadrigemina cDNA, RIKEN full-length enriched library, clone:B230112B02 product:unclassifiable, full insert sequence.			-32605
chr7	144943370	144943670	hit	0.096	0.882	20	235.55	9.55	252.6	43.4	23.65	23768	hit	Ccnd1	NM_007631	NP_031657	Mus musculus cyclin D1 (Ccnd1), mRNA.			-3445
chr18	69671440	69671740	hit	0.018	0.606	7	233.6	2.7	137.6	14.85	10.35	551	hit	Tcf4	NM_001083967;NM_013685	NP_001077436;NP_038713	Mus musculus transcription factor 4 (Tcf4), transcript variant 1, mRNA.;Mus musculus transcription factor 4 (Tcf4), transcript variant 2, mRNA.			78014
chr5	74941460	74941760	hit	0.034	0.788	10.9	232.7	10.25	217	12.9	19.55	13357	hit	Gm6116	NR_045866		Mus musculus predicted gene 6116 (Gm6116), long non-coding RNA.			-7433
chr19	9135730	9136030	hit	0.058	0.754	13.1	231.45	3.05	184.75	16.65	13	10284	hit	Asrgl1	NM_025610	NP_079886	Mus musculus asparaginase like 1 (Asrgl1), mRNA.			-164
chr18	53744890	53745190	hit	0.062	0.722	9.65	229.95	5.65	230.45	15	17.4	21405	hit	Cep120	NM_178686	NP_848801	Mus musculus centrosomal protein 120 (Cep120), mRNA.			-343
chr9	32635890	32636190	hit	0.02	0.786	19	228.6	8	203.5	5	16	8837	hit	Ets1			Mus musculus E26 avian leukemia oncogene 1, 5' domain (Ets1), transcript variant 2, mRNA.			-30
chr9	32636040	32636340	hit	0.022	0.76	16.8	222.55	8	220.1	9	12	7898	hit	Ets1			Mus musculus E26 avian leukemia oncogene 1, 5' domain (Ets1), transcript variant 2, mRNA.			0
chr11	77930470	77930770	hit	0.078	0.938	16.45	222.5	2	179.5	19.9	26.35	11754	hit	Sez6	;NM_001291225;NM_021286	;NP_001278154;NP_067261	Mus musculus seizure related gene 6 (Sez6), transcript variant 1, mRNA.;Mus musculus seizure related gene 6 (Sez6), transcript variant 2, mRNA.			-68
chr10	116409290	116409590	hit	0.032	0.67	7	221.95	4	192.65	9.5	3	424	hit	Kcnmb4os1	NR_028107		Mus musculus potassium large conductance calcium-activated channel, subfamily M, beta member 4, opposite strand 1 (Kcnmb4os1), long non-coding RNA.			-8530
chr2	172797140	172797440	hit	0.026	0.672	8	217.35	4	173.3	10.8	14.95	1808	hit	BC116387			Mus musculus cDNA clone IMAGE:40101788.			-64989
chr19	5394770	5395070	hit	0.02	0.786	9.5	216.45	3	167.5	17.25	14.1	1910	hit	Tsga10ip			SubName: Full=Protein Tsga10ip ;			-369
chr11	109668080	109668380	hit	0.024	0.734	7.15	215.95	3	151	10.25	8.95	301	hit	Prkar1a	NM_021880	NP_068680	Mus musculus protein kinase, cAMP dependent regulatory, type I, alpha (Prkar1a), mRNA.			17131
chr1	120357650	120357950	hit	0.03	0.758	9.3	214.7	3	143.2	11.15	12	2986	hit	C1ql2	NM_207233	NP_997116	Mus musculus complement component 1, q subcomponent-like 2 (C1ql2), mRNA.			17068
chr2	75955960	75956260	hit	0.038	0.742	10.6	213.2	12.15	139.8	9.6	18.35	1551	hit	Ttc30b	NM_028235	NP_082511	Mus musculus tetratricopeptide repeat domain 30B (Ttc30b), mRNA.			-17498
chr18	69671550	69671850	hit	0.02	0.628	7	212.6	3	143.65	15.85	14.95	565	hit	Tcf4	NM_001083967;NM_013685	NP_001077436;NP_038713	Mus musculus transcription factor 4 (Tcf4), transcript variant 1, mRNA.;Mus musculus transcription factor 4 (Tcf4), transcript variant 2, mRNA.			78124
chr4	133241360	133241660	hit	0.124	1.004	34	211.95	6.3	203.3	26.65	16.7	36617	hit	Map3k6	NM_016693	NP_057902	Mus musculus mitogen-activated protein kinase kinase kinase 6 (Map3k6), mRNA.			542
chr18	67088060	67088360	hit	0.098	0.962	10	211.85	6	201.8	15.75	25.55	9096	hit	Gnal	NM_177137	NP_796111	Mus musculus guanine nucleotide binding protein, alpha stimulating, olfactory type (Gnal), transcript variant 2, mRNA.			0
chr11	77930340	77930640	hit	0.044	0.828	11	211.5	2	160.3	19.85	20	2509	hit	Sez6	;NM_001291225;NM_021286	;NP_001278154;NP_067261	Mus musculus seizure related gene 6 (Sez6), transcript variant 1, mRNA.;Mus musculus seizure related gene 6 (Sez6), transcript variant 2, mRNA.			-198
chr16	34658390	34658690	hit	0.034	0.726	18	210.85	3.9	155.7	11.65	18.7	2808	hit	Ropn1	NM_030744	NP_109669	Mus musculus ropporin, rhophilin associated protein 1 (Ropn1), mRNA.			7179
chr10	18533180	18533480	hit	0.024	0.644	14	208.9	4	139.1	17.35	10	434	hit	Hebp2	;NM_019487	;NP_062360	Mus musculus heme binding protein 2 (Hebp2), mRNA.			12595
chr7	144943570	144943870	hit	0.098	0.856	9.7	208.85	9.5	187	23.5	21.85	15316	hit	Ccnd1	NM_007631	NP_031657	Mus musculus cyclin D1 (Ccnd1), mRNA.			-3645
chrX	75578120	75578420	hit	0.066	0.71	14	208.3	8	203.95	33.4	13.75	4708	hit	Rab39b	NM_175122	NP_780331	Mus musculus RAB39B, member RAS oncogene family (Rab39b), mRNA.			0
chr18	67088180	67088480	hit	0.128	1.028	11	208.25	6	192.55	18.95	17.3	12013	hit	Gnal	NM_177137	NP_796111	Mus musculus guanine nucleotide binding protein, alpha stimulating, olfactory type (Gnal), transcript variant 2, mRNA.			0
chr2	158556840	158557140	hit	0.026	0.82	6.55	206.3	11.3	178.25	16.3	8.8	5170	hit	Arhgap40	NM_001145015	NP_001138487	Mus musculus Rho GTPase activating protein 40 (Arhgap40), mRNA.			44044
chr9	78553000	78553300	hit	0.042	0.72	21.4	205.95	11	194	27.4	40.75	3884	hit	Slc17a5	;NM_001276452;NM_172773	;NP_001263381;NP_766361	Mus musculus solute carrier family 17 (anion/sugar transporter), member 5 (Slc17a5), transcript variant 1, mRNA.;Mus musculus solute carrier family 17 (anion/sugar transporter), member 5 (Slc17a5), transcript variant 2, mRNA.			34744
chrX	49797510	49797810	hit	0.056	0.884	13.15	204.9	6	190.35	20.1	19.3	13244	hit	Igsf1	NM_177591;NM_177915	NP_808583;NP_899179	Mus musculus immunoglobulin superfamily, member 1 (Igsf1), transcript variant 1, mRNA.;Mus musculus immunoglobulin superfamily, member 1 (Igsf1), transcript variant 2, mRNA.			0
chr11	69067020	69067320	hit	0.024	0.724	31.75	204.9	6.4	208.2	35.05	22.3	8640	hit	TRNA_Trp			transfer RNA Trp (anticodon CCA)		chr11.tRNA1820-TrpCCA	-3454
chr4	80910590	80910890	hit	0.046	0.72	20.2	204.55	6.3	206.45	24.85	11.75	5210	hit	Lurap1l	NM_026821	NP_081097	Mus musculus leucine rich adaptor protein 1-like (Lurap1l), mRNA.			0
chr14	105676520	105676820	hit	0.018	0.608	13.05	204.3	1	173.55	13.9	12.1	2178	hit	AK045385			Mus musculus adult male corpora quadrigemina cDNA, RIKEN full-length enriched library, clone:B230112B02 product:unclassifiable, full insert sequence.			-32795
chr10	116422540	116422840	hit	0.008	0.654	13.45	203.6	5.45	155.35	9.45	11.35	380	hit	Kcnmb4os1	NR_028107		Mus musculus potassium large conductance calcium-activated channel, subfamily M, beta member 4, opposite strand 1 (Kcnmb4os1), long non-coding RNA.			4419
chr5	116429380	116429680	hit	0.03	0.756	7.45	203.55	3.45	183.15	31.4	10	809	hit	Hspb8	NM_030704	NP_109629	Mus musculus heat shock protein 8 (Hspb8), mRNA.			-6516
chr1	79761980	79762280	hit	0.052	0.764	10	202.5	6	184.55	14	16.7	4321	hit	Wdfy1	NM_001111279;NM_027057	NP_001104749;NP_081333	Mus musculus WD repeat and FYVE domain containing 1 (Wdfy1), transcript variant 1, mRNA.;Mus musculus WD repeat and FYVE domain containing 1 (Wdfy1), transcript variant 2, mRNA.			-211
chr11	119044100	119044400	hit	0.026	0.816	10.6	198.35	6	151.35	19.2	12.45	6623	hit	Cbx8	NM_013926	NP_038954	Mus musculus chromobox 8 (Cbx8), mRNA.			-3187
chr1	120357820	120358120	hit	0.026	0.696	7.4	197	1	124.7	11.95	15	3124	hit	C1ql2	NM_207233	NP_997116	Mus musculus complement component 1, q subcomponent-like 2 (C1ql2), mRNA.			17238
chr17	74943620	74943920	hit	0.012	0.688	15.8	195.7	3	169	18.9	8	1075	hit	Ltbp1	NM_019919	NP_064303	Mus musculus latent transforming growth factor beta binding protein 1 (Ltbp1), transcript variant 1, mRNA.			-61608
chr4	99120780	99121080	hit	0.206	1.144	15.15	195.55	12	202.5	34.1	15.05	34412	hit	Dock7	NM_001290636;NM_026082	NP_001277565;NP_080358	Mus musculus dedicator of cytokinesis 7 (Dock7), transcript variant 1, mRNA.;Mus musculus dedicator of cytokinesis 7 (Dock7), transcript variant 2, mRNA.			0
chr12	109526550	109526850	hit	0.046	0.79	3	195.05	4	142.55	16.95	3.95	1024	hit	Meg3	;NR_027651;NR_027652		Mus musculus maternally expressed 3 (Meg3), transcript variant 2, long non-coding RNA.;Mus musculus maternally expressed 3 (Meg3), transcript variant 3, long non-coding RNA.			-14145
chr10	116409140	116409440	hit	0.028	0.644	3.5	191.75	3.15	143.2	7.9	1.65	369	hit	Kcnmb4os1	NR_028107		Mus musculus potassium large conductance calcium-activated channel, subfamily M, beta member 4, opposite strand 1 (Kcnmb4os1), long non-coding RNA.			-8680
chr7	18961600	18961900	hit	0.02	0.744	12.4	191.35	9	140.6	17	18.25	2822	hit	Nanos2	NM_194064	NP_918953	Mus musculus nanos homolog 2 (Drosophila) (Nanos2), mRNA.			-25623
chr13	102993060	102993360	hit	0.016	0.662	7.7	190.25	4	148	7.6	3.95	262	hit	Mast4			Mus musculus microtubule associated serine/threonine kinase family member 4 (Mast4), mRNA.			-205611
chr10	112464910	112465210	hit	0.038	0.646	5	190	1	182.15	12	8	198	hit	Kcnc2			Mus musculus potassium voltage gated channel, Shaw-related subfamily, member 2 (Kcnc2), mRNA.			9302
chr7	100492320	100492620	hit	0.042	0.758	20	189.35	12	178.8	14	18.6	2895	hit	Ucp2	NM_011671	NP_035801	Mus musculus uncoupling protein 2 (mitochondrial, proton carrier) (Ucp2), mRNA.			-737
chr6	127251770	127252070	hit	0.014	0.794	15.6	189	5	99.4	16.1	8	6887	hit	D130058E03	NR_073373		Mus musculus uncharacterized D130058E03 (D130058E03), long non-coding RNA.			55896
chr1	131821260	131821560	hit	0.024	0.632	6.4	188.2	6	137.45	22.15	10	464	hit	BC049922			Mus musculus RIKEN cDNA 4732466D17 gene, mRNA (cDNA clone IMAGE:5053952), partial cds.			4588
chr10	59878930	59879230	hit	0.048	0.726	19	187.65	6.75	140.45	9.1	16.7	3607	hit	Dnajb12	;NM_019965	;NP_064349	Mus musculus DnaJ (Hsp40) homolog, subfamily B, member 12 (Dnajb12), mRNA.			-360
chrX	77433610	77433910	hit	0.052	0.868	11	186.6	6	158.25	37.45	28.9	19351	hit	JA187517			Sequence 38 from Patent WO2011020005.			-68868
chr5	115490470	115490770	hit	0.05	0.632	15.5	186.15	7.2	165.6	11.05	10.75	18021	hit	Sirt4	NM_133760	NP_598521	Mus musculus sirtuin 4 (Sirt4), transcript variant 2, mRNA.			-5986
chr18	46503860	46504160	hit	0.034	0.662	12.35	185.95	2	86.95	15.8	16.7	536	hit	Fem1c	NM_173423	NP_775599	Mus musculus fem-1 homolog c (C.elegans) (Fem1c), mRNA.			21810
chr14	66280950	66281250	hit	0.06	0.924	28.8	185.9	7	182.25	18	18.05	7265	hit	Ptk2b	NM_001162365;NM_172498	NP_001155837;NP_766086	Mus musculus PTK2 protein tyrosine kinase 2 beta (Ptk2b), transcript variant 2, mRNA.;Mus musculus PTK2 protein tyrosine kinase 2 beta (Ptk2b), transcript variant 3, mRNA.			0
chr5	74941610	74941910	hit	0.034	0.74	18	185.75	7.4	160.55	10.65	14.8	13150	hit	Gm6116	NR_045866		Mus musculus predicted gene 6116 (Gm6116), long non-coding RNA.			-7283
chr14	66281180	66281480	hit	0.028	0.822	15.25	185.55	5.15	158.05	5.75	11.7	2741	hit	Ptk2b	NM_001162365;NM_172498	NP_001155837;NP_766086	Mus musculus PTK2 protein tyrosine kinase 2 beta (Ptk2b), transcript variant 2, mRNA.;Mus musculus PTK2 protein tyrosine kinase 2 beta (Ptk2b), transcript variant 3, mRNA.			-128
chr19	55380810	55381110	hit	0.03	0.602	24.95	185.4	11	131.65	14	16.3	3803	hit	Vti1a	NM_001293685;NM_001293686;NM_016862	NP_001280614;NP_001280615;NP_058558	Mus musculus vesicle transport through interaction with t-SNAREs 1A (Vti1a), transcript variant 1, mRNA.;Mus musculus vesicle transport through interaction with t-SNAREs 1A (Vti1a), transcript variant 2, mRNA.;Mus musculus vesicle transport through interaction with t-SNAREs 1A (Vti1a), transcript variant 3, mRNA.			64753
chr18	53744680	53744980	hit	0.1	0.846	14	185.3	13.5	201.7	31	42.3	41683	hit	Cep120	NM_178686	NP_848801	Mus musculus centrosomal protein 120 (Cep120), mRNA.			-133
chr19	9136090	9136390	hit	0.012	0.622	15.95	185.3	9	149.8	16.3	14.2	1105	hit	Asrgl1	NM_025610	NP_079886	Mus musculus asparaginase like 1 (Asrgl1), mRNA.			-524
chr2	91978410	91978710	hit	0.006	0.796	15.35	184.95	8.05	183.9	10	12.45	2018	hit	Dgkz	NM_138306	NP_612179	Mus musculus diacylglycerol kinase zeta (Dgkz), transcript variant 2, mRNA.			-12810
chr14	8449660	8449960	hit	0.01	0.678	10.65	184	4	91.9	15	14	559	hit	Oit1	NM_146050	NP_666162	Mus musculus oncoprotein induced transcript 1 (Oit1), mRNA.			-70897
chr11	107625690	107625990	hit	0.026	0.656	12.8	182.55	7	76.2	18.6	19.45	397	hit	Helz	NM_198298	NP_938040	Mus musculus helicase with zinc finger domain (Helz), mRNA.			-1330
chr12	84175360	84175660	hit	0.034	0.812	13.45	182.05	4	120.6	18.5	10.85	6476	hit	Elmsan1	NM_001163502	NP_001156974	Mus musculus ELM2 and Myb/SANT-like domain containing 1 (Elmsan1), transcript variant 1, mRNA.			18354
chr5	147874120	147874420	hit	0.024	0.814	11.3	182	4.9	160.55	8.75	6	374	hit	Pomp	;NM_025624	;NP_079900	Mus musculus proteasome maturation protein (Pomp), mRNA.			13492
chr19	9135370	9135670	hit	0.082	0.88	16.65	180.55	6.7	197.3	23.85	21.6	18923	hit	Asrgl1	NM_025610	NP_079886	Mus musculus asparaginase like 1 (Asrgl1), mRNA.			0
chr1	120357990	120358290	hit	0.02	0.708	7	180.1	1.7	106.4	12.45	18.2	2883	hit	C1ql2	NM_207233	NP_997116	Mus musculus complement component 1, q subcomponent-like 2 (C1ql2), mRNA.			17408
chr15	48789050	48789350	hit	0.01	0.656	9.4	179.15	3	103.65	15.4	16.1	418	hit	Csmd3	;NM_001081391	;NP_001074860	Mus musculus CUB and Sushi multiple domains 3 (Csmd3), mRNA.			2638
chr7	3441150	3441450	hit	0.008	0.778	9.5	179.05	3.1	152.45	22.05	16.25	664	hit	Cacng6	NM_133183	NP_573446	Mus musculus calcium channel, voltage-dependent, gamma subunit 6 (Cacng6), mRNA.			16488
chr11	77930270	77930570	hit	0.028	0.79	5.7	178.8	2.5	129.3	20.5	16.35	2148	hit	Sez6	;NM_001291225;NM_021286	;NP_001278154;NP_067261	Mus musculus seizure related gene 6 (Sez6), transcript variant 1, mRNA.;Mus musculus seizure related gene 6 (Sez6), transcript variant 2, mRNA.			-268
chr13	97091770	97092070	hit	0.036	0.664	10.2	178.65	3.45	77.5	13.5	8.15	347	hit	Fam169a	NM_001100458	NP_001139517	Mus musculus family with sequence similarity 169, member A (Fam169a), transcript variant 1, mRNA.			20127
chrX	153723420	153723720	hit	0.064	0.774	6.9	178.55	6.05	163	27.95	19.15	6762	hit	2210013O21Rik	NM_027327	NP_081603	Mus musculus RIKEN cDNA 2210013O21 gene (2210013O21Rik), mRNA.			0
chr4	80910210	80910510	hit	0.024	0.68	8.75	177.55	3.25	138.3	13.7	11.55	2211	hit	Lurap1l	NM_026821	NP_081097	Mus musculus leucine rich adaptor protein 1-like (Lurap1l), mRNA.			-175
chr8	128944320	128944620	hit	0.014	0.476	9.4	177.15	5	105.05	9.65	19.3	152	hit	Ccdc7	NM_001197041;NM_029061	NP_001183970;NP_083337	Mus musculus coiled-coil domain containing 7 (Ccdc7), transcript variant 1, mRNA.;Mus musculus coiled-coil domain containing 7 (Ccdc7), transcript variant 2, mRNA.			120871
chr14	105676610	105676910	hit	0.018	0.622	12.55	176.35	2	152.15	20.7	17.55	2267	hit	AK045385			Mus musculus adult male corpora quadrigemina cDNA, RIKEN full-length enriched library, clone:B230112B02 product:unclassifiable, full insert sequence.			-32885
chr5	134102390	134102690	hit	0.022	0.836	7.5	176.15	10.95	144.6	15.65	11.05	1218	hit	Gatsl2	NM_030719	NP_109644	Mus musculus GATS protein-like 2 (Gatsl2), mRNA.			2642
chr8	128944270	128944570	hit	0.014	0.468	8	175.85	5	99.95	10.8	18.45	154	hit	Ccdc7	NM_001197041;NM_029061	NP_001183970;NP_083337	Mus musculus coiled-coil domain containing 7 (Ccdc7), transcript variant 1, mRNA.;Mus musculus coiled-coil domain containing 7 (Ccdc7), transcript variant 2, mRNA.			120921
chr7	18961840	18962140	hit	0.026	0.796	9.05	175.3	8	123.05	17.55	10	2060	hit	Nanos2	NM_194064	NP_918953	Mus musculus nanos homolog 2 (Drosophila) (Nanos2), mRNA.			-25383
chr3	30643170	30643470	hit	0.022	0.654	16.55	174.95	5	107.6	26.55	11.45	172	hit	Lrriq4	NM_026668	NP_080944	Mus musculus leucine-rich repeats and IQ motif containing 4 (Lrriq4), transcript variant 1, mRNA.			-1036
chr10	12609820	12610120	hit	0.04	0.722	9	174.9	8.45	164.95	16	17.65	518	hit	Utrn			Mus musculus utrophin (Utrn), mRNA.			4770
chr15	48789310	48789610	hit	0.028	0.634	10.85	173.9	3	101	8.6	9	1143	hit	Csmd3	;NM_001081391	;NP_001074860	Mus musculus CUB and Sushi multiple domains 3 (Csmd3), mRNA.			2378
chr6	100438510	100438810	hit	0.036	0.816	9.2	173.55	11.75	228.1	24.8	19.6	9290	hit	1700049E22Rik	NR_040525		Mus musculus RIKEN cDNA 1700049E22 gene (1700049E22Rik), long non-coding RNA.			-88589
chr12	73051590	73051890	hit	0.026	0.638	8.15	173.4	10	125.95	18.3	20.55	1083	hit	Six1	NM_009189	NP_033215	Mus musculus sine oculis-related homeobox 1 (Six1), mRNA.			-4878
chr2	77519560	77519860	hit	0.042	0.654	3	173.3	7	135.25	8.8	9.6	3679	hit	Zfp385b	NM_001113400	NP_001106871	Mus musculus zinc finger protein 385B (Zfp385b), transcript variant 3, mRNA.			0
chr12	84175480	84175780	hit	0.036	0.812	15.65	173.25	4.9	114.75	29.35	17	11206	hit	Elmsan1	NM_001163502	NP_001156974	Mus musculus ELM2 and Myb/SANT-like domain containing 1 (Elmsan1), transcript variant 1, mRNA.			18234
chr7	144943660	144943960	hit	0.076	0.818	13.5	172.4	7	140.75	16.9	22.55	5834	hit	Ccnd1	NM_007631	NP_031657	Mus musculus cyclin D1 (Ccnd1), mRNA.			-3735
chr11	119044200	119044500	hit	0.032	0.834	6	172.15	5	133.55	11.7	12	4308	hit	Cbx8	NM_013926	NP_038954	Mus musculus chromobox 8 (Cbx8), mRNA.			-3287
chr18	30340220	30340520	hit	0.024	0.618	8.2	171.7	2	122.25	17.4	11.85	251	hit	Pik3c3	;NM_181414	;NP_852079	Mus musculus phosphoinositide-3-kinase, class 3 (Pik3c3), mRNA.			67324
chr5	116429280	116429580	hit	0.032	0.76	13	171.35	5	163.05	28.45	14.2	931	hit	Hspb8	NM_030704	NP_109629	Mus musculus heat shock protein 8 (Hspb8), mRNA.			-6416
chr18	67087870	67088170	hit	0.054	0.858	4	171.3	6.95	174.35	13.6	23.15	4779	hit	Gnal	NM_177137	NP_796111	Mus musculus guanine nucleotide binding protein, alpha stimulating, olfactory type (Gnal), transcript variant 2, mRNA.			-127
chr14	118090050	118090350	hit	0.044	0.732	20.1	170.95	7.95	148.25	23.65	12	6469	hit	TRNA_Phe			transfer RNA Phe (anticodon GAA)		chr14.tRNA462-PheGAA	-453
chr12	84174950	84175250	hit	0.012	0.76	16	170.35	8.65	138.95	31.2	13.9	2244	hit	Elmsan1	NM_001163502	NP_001156974	Mus musculus ELM2 and Myb/SANT-like domain containing 1 (Elmsan1), transcript variant 1, mRNA.			18764
chr7	100492420	100492720	hit	0.05	0.814	21.55	170	10	153.3	12.9	19.9	4610	hit	Ucp2	NM_011671	NP_035801	Mus musculus uncoupling protein 2 (mitochondrial, proton carrier) (Ucp2), mRNA.			-637
chr9	78552770	78553070	hit	0.044	0.74	21.05	169.65	5.15	126.7	11.5	10.35	2628	hit	Slc17a5	;NM_001276452;NM_172773	;NP_001263381;NP_766361	Mus musculus solute carrier family 17 (anion/sugar transporter), member 5 (Slc17a5), transcript variant 1, mRNA.;Mus musculus solute carrier family 17 (anion/sugar transporter), member 5 (Slc17a5), transcript variant 2, mRNA.			34974
chr2	158557140	158557440	hit	0.016	0.796	12.25	169.25	5.15	165.95	10.7	13.85	2358	hit	Arhgap40	NM_001145015	NP_001138487	Mus musculus Rho GTPase activating protein 40 (Arhgap40), mRNA.			44344
chr7	18962610	18962910	hit	0.066	0.844	12.85	169.05	4.3	163.25	13	13.55	6795	hit	Nanos2	NM_194064	NP_918953	Mus musculus nanos homolog 2 (Drosophila) (Nanos2), mRNA.			-24613
chr10	79613880	79614180	hit	0.112	1.044	20.45	169.05	7.2	132.15	32.7	15.9	31005	hit	C2cd4c	NM_198614	NP_941016	Mus musculus C2 calcium-dependent domain containing 4C (C2cd4c), transcript variant 1, mRNA.			0
chr8	128944410	128944710	hit	0.014	0.472	10.5	168.95	5	105.5	14	25	171	hit	Ccdc7	NM_001197041;NM_029061	NP_001183970;NP_083337	Mus musculus coiled-coil domain containing 7 (Ccdc7), transcript variant 1, mRNA.;Mus musculus coiled-coil domain containing 7 (Ccdc7), transcript variant 2, mRNA.			120781
chrX	49797300	49797600	hit	0.052	0.814	7.65	168.3	3.8	142.9	15.55	11.9	5798	hit	Igsf1	NM_177591;NM_177915	NP_808583;NP_899179	Mus musculus immunoglobulin superfamily, member 1 (Igsf1), transcript variant 1, mRNA.;Mus musculus immunoglobulin superfamily, member 1 (Igsf1), transcript variant 2, mRNA.			144
chr3	27711440	27711740	hit	0.056	0.712	3.95	167.85	5.55	120.7	9.15	11.9	11495	hit	Fndc3b			Mus musculus fibronectin type III domain containing 3B (Fndc3b), mRNA.			-133
chr10	71267680	71267980	hit	0.03	0.72	12.95	167.5	2.55	154.2	13.85	8.65	641	hit	Ube2d1	NM_145420	NP_663395	Mus musculus ubiquitin-conjugating enzyme E2D 1 (Ube2d1), mRNA.			17281
chr8	114205010	114205310	hit	0.028	0.802	5.85	167.45	4.8	118.8	20.6	14.15	6319	hit	Vat1l	NM_173016	NP_766604	Mus musculus vesicle amine transport protein 1 homolog-like (T. californica) (Vat1l), mRNA.			-329
chr12	84175130	84175430	hit	0.012	0.764	20.75	166.8	5.2	110.1	21.95	7	2011	hit	Elmsan1	NM_001163502	NP_001156974	Mus musculus ELM2 and Myb/SANT-like domain containing 1 (Elmsan1), transcript variant 1, mRNA.			18584
chr1	120357550	120357850	hit	0.028	0.762	15	166.5	2	120.45	15.05	11.75	4129	hit	C1ql2	NM_207233	NP_997116	Mus musculus complement component 1, q subcomponent-like 2 (C1ql2), mRNA.			16968
chr13	102993200	102993500	hit	0.018	0.654	9	166.3	1	130.15	6.65	4.8	245	hit	Mast4			Mus musculus microtubule associated serine/threonine kinase family member 4 (Mast4), mRNA.			-205751
chr19	4854020	4854320	hit	0.026	0.688	11.5	166.25	3	78.45	14.75	11.9	554	hit	Ctsf	NM_019861	NP_063914	Mus musculus cathepsin F (Ctsf), mRNA.			-808
chr4	101264110	101264410	hit	0.038	0.7	12.95	166	5	125.75	20.3	12.1	3028	hit	Jak1	NM_146145	NP_666257	Mus musculus Janus kinase 1 (Jak1), mRNA.			871
chr3	85593470	85593770	hit	0.018	0.634	23.1	165.35	4	66.85	18	15.35	329	hit	Gatb	;NM_144896	;NP_659145	Mus musculus glutamyl-tRNA(Gln) amidotransferase, subunit B (Gatb), mRNA.			19341
chrX	75578280	75578580	hit	0.044	0.634	7.1	164.75	1.55	137.95	14.6	13.25	2700	hit	Rab39b	NM_175122	NP_780331	Mus musculus RAB39B, member RAS oncogene family (Rab39b), mRNA.			-49
chr17	48041820	48042120	hit	0.05	0.834	14	164.45	6.6	145.6	17.8	10.05	7240	hit	1700122O11Rik	NM_029689	NP_083965	Mus musculus RIKEN cDNA 1700122O11 gene (1700122O11Rik), mRNA.			-3527
chrX	77509160	77509460	hit	0.038	0.704	13	164.4	2.7	192.3	42.35	25	10948	hit	Tbl1x	NM_020601	NP_065626	Mus musculus transducin (beta)-like 1 X-linked (Tbl1x), mRNA.			-1766
chr12	73051920	73052220	hit	0.042	0.728	8	164.3	13	154.55	20.55	13.35	5834	hit	Six1	NM_009189	NP_033215	Mus musculus sine oculis-related homeobox 1 (Six1), mRNA.			-5208
chr2	168763420	168763720	hit	0.022	0.7	11.65	164.25	6.3	111.8	17.75	3.05	2168	hit	AK052878			Mus musculus 16 days neonate heart cDNA, RIKEN full-length enriched library, clone:D830018J03 product:unclassifiable, full insert sequence.			-2422
chr16	77042410	77042710	hit	0.02	0.734	7	164.25	3	125.75	11	8	481	hit	Usp25	NM_013918	NP_038946	Mus musculus ubiquitin specific peptidase 25 (Usp25), mRNA.			28341
chr18	69671220	69671520	hit	0.014	0.632	10.55	163.9	4	83.1	6.4	16.1	361	hit	Tcf4	NM_001083967;NM_013685	NP_001077436;NP_038713	Mus musculus transcription factor 4 (Tcf4), transcript variant 1, mRNA.;Mus musculus transcription factor 4 (Tcf4), transcript variant 2, mRNA.			77794
chr18	30339950	30340250	hit	0.022	0.65	17.9	163.15	2.55	83.85	17.05	9.4	326	hit	Pik3c3	;NM_181414	;NP_852079	Mus musculus phosphoinositide-3-kinase, class 3 (Pik3c3), mRNA.			67054
chr17	33842140	33842440	hit	0.022	0.688	9.3	162.95	8	136.4	14.95	12.95	1486	hit	Cd320	NM_019421	NP_062294	Mus musculus CD320 antigen (Cd320), transcript variant 1, mRNA.			-650
chr2	77519740	77520040	hit	0.024	0.632	3	162.9	5	94.75	9	10.65	1299	hit	Zfp385b	NM_001113400	NP_001106871	Mus musculus zinc finger protein 385B (Zfp385b), transcript variant 3, mRNA.			-74
chr16	34658520	34658820	hit	0.034	0.674	14.8	162.6	2.35	127.55	7.95	20.25	2585	hit	Ropn1	NM_030744	NP_109669	Mus musculus ropporin, rhophilin associated protein 1 (Ropn1), mRNA.			7309
chr1	79762080	79762380	hit	0.028	0.72	8	162.35	5.75	155.4	12.3	17.4	4727	hit	Wdfy1	NM_001111279;NM_027057	NP_001104749;NP_081333	Mus musculus WD repeat and FYVE domain containing 1 (Wdfy1), transcript variant 1, mRNA.;Mus musculus WD repeat and FYVE domain containing 1 (Wdfy1), transcript variant 2, mRNA.			-311
chr6	127251700	127252000	hit	0.016	0.798	11.45	162.3	3.75	85.55	12.3	3	4769	hit	D130058E03	NR_073373		Mus musculus uncharacterized D130058E03 (D130058E03), long non-coding RNA.			55966
chr17	7533210	7533510	hit	0.016	0.722	9	162.25	3	74.2	12	15.8	242	hit	Gm9992	NM_001142539	NP_001136011	Mus musculus predicted gene 9992 (Gm9992), mRNA.			-147905
chr16	77041410	77041710	hit	0.018	0.624	12.35	161.6	7	119.6	7	3.25	1192	hit	Usp25	NM_013918	NP_038946	Mus musculus ubiquitin specific peptidase 25 (Usp25), mRNA.			27341
chr10	79613980	79614280	hit	0.102	1.002	22	161.6	9.45	133.8	31.75	22.3	28178	hit	C2cd4c	NM_198614	NP_941016	Mus musculus C2 calcium-dependent domain containing 4C (C2cd4c), transcript variant 1, mRNA.			0
chr5	147873930	147874230	hit	0.022	0.818	8.1	161.25	7.3	155.1	13	11.3	377	hit	Pomp	;NM_025624	;NP_079900	Mus musculus proteasome maturation protein (Pomp), mRNA.			13302
chr3	21935860	21936160	hit	0.058	0.848	22	161.1	6.35	151.45	25.65	20.05	30794	hit	AK080657			Mus musculus 10 days neonate cortex cDNA, RIKEN full-length enriched library, clone:A830043K18 product:unclassifiable, full insert sequence.			-135087
chr12	32009260	32009560	hit	0.008	0.742	19.75	160.65	3	127.4	19.45	4.65	1753	hit	Prkar2b	NM_011158	NP_035288	Mus musculus protein kinase, cAMP dependent regulatory, type II beta (Prkar2b), mRNA.			51718
chr5	110057890	110058190	hit	0.038	0.84	29.9	160.55	5.2	112.15	38.85	35.95	16563	hit	Plcxd1	NM_207279	NP_997162	Mus musculus phosphatidylinositol-specific phospholipase C, X domain containing 1 (Plcxd1), transcript variant 1, mRNA.			-41778
chr14	118089870	118090170	hit	0.064	0.786	10.75	160.4	10.2	139.5	24.6	18	10027	hit	TRNA_Phe			transfer RNA Phe (anticodon GAA)		chr14.tRNA462-PheGAA	-273
chr2	78927800	78928100	hit	0.014	0.636	2	159.9	3	88.15	5.95	11	338	hit	Ube2e3	NM_009454	NP_033480	Mus musculus ubiquitin-conjugating enzyme E2E 3 (Ube2e3), mRNA.			58753
chr11	62847310	62847610	hit	0.026	0.76	15.35	159.85	7	142.6	9.95	16	1164	hit	Fbxw10	;NM_001033669;NM_001291441	;NP_001028841;NP_001278370	Mus musculus F-box and WD-40 domain protein 10 (Fbxw10), transcript variant 1, mRNA.;Mus musculus F-box and WD-40 domain protein 10 (Fbxw10), transcript variant 2, mRNA.			187
chr17	7532560	7532860	hit	0.014	0.704	9.6	159.75	6.55	56.9	14.05	10.1	203	hit	Gm9992	NM_001142539	NP_001136011	Mus musculus predicted gene 9992 (Gm9992), mRNA.			-147255
chr19	5394380	5394680	hit	0.03	0.848	8	159.3	3	132.7	20.5	7.55	1973	hit	Tsga10ip			SubName: Full=Protein Tsga10ip ;			0
chr11	62847610	62847910	hit	0.018	0.78	11	158.85	5.15	146.4	13.25	15.6	1356	hit	Fbxw10	;NM_001033669;NM_001291441	;NP_001028841;NP_001278370	Mus musculus F-box and WD-40 domain protein 10 (Fbxw10), transcript variant 1, mRNA.;Mus musculus F-box and WD-40 domain protein 10 (Fbxw10), transcript variant 2, mRNA.			487
chr13	64122340	64122640	hit	0.006	0.606	13.3	158.55	6	153.6	9	3.2	256	hit	Slc35d2	;NM_001001321	;NP_001001321	Mus musculus solute carrier family 35, member D2 (Slc35d2), mRNA.			6689
chr14	66281850	66282150	hit	0.012	0.7	13.4	158.55	10.05	91.9	17.2	24.25	598	hit	Ptk2b	NM_001162365;NM_172498	NP_001155837;NP_766086	Mus musculus PTK2 protein tyrosine kinase 2 beta (Ptk2b), transcript variant 2, mRNA.;Mus musculus PTK2 protein tyrosine kinase 2 beta (Ptk2b), transcript variant 3, mRNA.			-798
chr2	119146960	119147260	hit	0.042	0.846	16.7	158.45	4	123.05	3.9	8.2	593	hit	Rmdn3	NM_001033136	NP_001028308	Mus musculus regulator of microtubule dynamics 3 (Rmdn3), mRNA.			9773
chr6	127251640	127251940	hit	0.016	0.808	11	158.4	4	78.4	14.15	2.9	4091	hit	D130058E03	NR_073373		Mus musculus uncharacterized D130058E03 (D130058E03), long non-coding RNA.			56026
chr12	105623110	105623410	hit	0.024	0.706	24.95	158.4	3	84	18.5	11.25	1186	hit	Atg2b			Mus musculus autophagy related 2B (Atg2b), mRNA.			0
chr4	116144290	116144590	hit	0.088	0.932	15	157.8	3	113.9	19.05	15.1	10682	hit	Lurap1	NM_026547	NP_080823	Mus musculus leucine rich adaptor protein 1 (Lurap1), mRNA.			25
chr5	74941220	74941520	hit	0.032	0.778	9.9	157.25	7.95	99.25	10.25	16.15	6917	hit	Gm6116	NR_045866		Mus musculus predicted gene 6116 (Gm6116), long non-coding RNA.			-7673
chr4	103619050	103619350	hit	0.042	0.816	6.05	157.05	2	93	12.35	9.65	3432	hit	Dab1	NM_010014	NP_034144	Mus musculus disabled 1 (Dab1), transcript variant 1, mRNA.			-314
chr7	49522660	49522960	hit	0.05	0.812	15.55	156.9	13.05	151.5	20.9	12	16799	hit	AK088944			Mus musculus 2 days neonate thymus thymic cells cDNA, RIKEN full-length enriched library, clone:E430032N19 product:unclassifiable, full insert sequence.			-30931
chr18	30340280	30340580	hit	0.022	0.614	5.95	156.8	2	104.7	15.35	8.65	239	hit	Pik3c3	;NM_181414	;NP_852079	Mus musculus phosphoinositide-3-kinase, class 3 (Pik3c3), mRNA.			67384
chr3	135499430	135499730	hit	0.006	0.598	12.7	156.8	4	87.45	14.9	14.6	462	hit	Manba	;NM_027288	;NP_081564	Mus musculus mannosidase, beta A, lysosomal (Manba), mRNA.			13819
chr18	46504050	46504350	hit	0.044	0.652	12.65	156.6	3	62.5	22.7	14.1	513	hit	Fem1c	NM_173423	NP_775599	Mus musculus fem-1 homolog c (C.elegans) (Fem1c), mRNA.			21620
chr15	48788890	48789190	hit	0.01	0.684	7.95	156.5	2.9	97.6	13.4	11.8	500	hit	Csmd3	;NM_001081391	;NP_001074860	Mus musculus CUB and Sushi multiple domains 3 (Csmd3), mRNA.			2798
chr14	105676750	105677050	hit	0.022	0.652	4	156.1	2.55	116.5	20.3	15.75	985	hit	AK045385			Mus musculus adult male corpora quadrigemina cDNA, RIKEN full-length enriched library, clone:B230112B02 product:unclassifiable, full insert sequence.			-33025
chr17	74943440	74943740	hit	0.018	0.702	8.35	155.95	2	112.85	20.55	8.15	679	hit	Ltbp1	NM_019919	NP_064303	Mus musculus latent transforming growth factor beta binding protein 1 (Ltbp1), transcript variant 1, mRNA.			-61788
chr6	48627020	48627320	hit	0.088	0.942	3	155.7	9.55	216.75	33.5	16.55	11955	hit	AI854703			Mus musculus expressed sequence AI854703 (AI854703), non-coding RNA.			256
chr9	36725890	36726190	hit	0.056	0.826	23.6	155.55	4.05	99.4	25.2	27.65	8933	hit	Chek1	NM_007691	NP_031717	Mus musculus checkpoint kinase 1 (Chek1), mRNA.			183
chr4	101264290	101264590	hit	0.072	0.806	16.75	155.45	7.3	120.1	21.05	11.6	5958	hit	Jak1	NM_146145	NP_666257	Mus musculus Janus kinase 1 (Jak1), mRNA.			691
chr16	34658160	34658460	hit	0.032	0.686	11.25	155.45	5.3	98.65	7	11.55	2373	hit	Ropn1	NM_030744	NP_109669	Mus musculus ropporin, rhophilin associated protein 1 (Ropn1), mRNA.			6949
chr14	66634420	66634720	hit	0.024	0.62	7	155.35	2	117.7	14.65	11	374	hit	Adra1a	NM_001271759;NM_001271760;NM_001271761;NM_013461	NP_001258688;NP_001258690;NP_038489	Mus musculus adrenergic receptor, alpha 1a (Adra1a), transcript variant 1, mRNA.;Mus musculus adrenergic receptor, alpha 1a (Adra1a), transcript variant 2, mRNA.;Mus musculus adrenergic receptor, alpha 1a (Adra1a), transcript variant 3, mRNA.;Mus musculus adrenergic receptor, alpha 1a (Adra1a), transcript variant 4, mRNA.			-530
chrX	153723260	153723560	hit	0.056	0.7	7.45	155.3	6	140.35	14.25	12	6518	hit	2210013O21Rik	NM_027327	NP_081603	Mus musculus RIKEN cDNA 2210013O21 gene (2210013O21Rik), mRNA.			0
chr12	109527710	109528010	hit	0.05	0.71	7.4	155.1	7.25	134.7	13	3	5661	hit	Meg3	;NR_027651;NR_027652		Mus musculus maternally expressed 3 (Meg3), transcript variant 2, long non-coding RNA.;Mus musculus maternally expressed 3 (Meg3), transcript variant 3, long non-coding RNA.			-12985
chr4	116144740	116145040	hit	0.048	0.818	19.1	155	2.9	115	18	18	3929	hit	Lurap1	NM_026547	NP_080823	Mus musculus leucine rich adaptor protein 1 (Lurap1), mRNA.			-124
chr3	30643080	30643380	hit	0.024	0.648	15.4	155	5	106.05	31.2	14.5	158	hit	Lrriq4	NM_026668	NP_080944	Mus musculus leucine-rich repeats and IQ motif containing 4 (Lrriq4), transcript variant 1, mRNA.			-1126
chr8	106289740	106290040	hit	0.018	0.766	11.3	154.7	11.65	152.35	23.2	21.75	1199	hit	4930506A18Rik	NR_126090;NR_126091		Mus musculus RIKEN cDNA 4930506A18 gene (4930506A18Rik), transcript variant 1, long non-coding RNA.;Mus musculus RIKEN cDNA 4930506A18 gene (4930506A18Rik), transcript variant 2, long non-coding RNA.			7511
chr12	29534240	29534540	hit	0.018	0.664	14	154.35	2	112.2	14.4	10.4	2911	hit	Myt1l	NM_001093776	NP_032692	Mus musculus myelin transcription factor 1-like (Myt1l), transcript variant 3, mRNA.			-364
chr14	118089800	118090100	hit	0.068	0.792	11.1	154.25	11.1	134.7	22.2	21.6	9220	hit	TRNA_Phe			transfer RNA Phe (anticodon GAA)		chr14.tRNA462-PheGAA	-203
chrX	77433500	77433800	hit	0.052	0.912	11.15	154.2	8	149.55	42.65	29.85	21711	hit	JA187517			Sequence 38 from Patent WO2011020005.			-68978
chr7	127042600	127042900	hit	0.05	0.732	18.1	154.1	1	113.1	16.95	22.25	7787	hit	Kif22	NM_145588	NP_663563	Mus musculus kinesin family member 22 (Kif22), mRNA.			-180
chr11	62847470	62847770	hit	0.02	0.766	17.45	153.9	7	140.7	12.3	14.2	1034	hit	Fbxw10	;NM_001033669;NM_001291441	;NP_001028841;NP_001278370	Mus musculus F-box and WD-40 domain protein 10 (Fbxw10), transcript variant 1, mRNA.;Mus musculus F-box and WD-40 domain protein 10 (Fbxw10), transcript variant 2, mRNA.			347
chr13	111738680	111738980	hit	0.016	0.594	10.45	153.7	2	95.6	9.3	18	211	hit	Mier3	NM_172593	NP_766181	Mus musculus mesoderm induction early response 1, family member 3 (Mier3), mRNA.			52329
chr3	27711500	27711800	hit	0.034	0.648	7	153.65	5	98.9	7	11.95	5315	hit	Fndc3b			Mus musculus fibronectin type III domain containing 3B (Fndc3b), mRNA.			-193
chr2	168763770	168764070	hit	0.028	0.728	11.9	153.55	4.9	100.85	18.7	12	3123	hit	AK052878			Mus musculus 16 days neonate heart cDNA, RIKEN full-length enriched library, clone:D830018J03 product:unclassifiable, full insert sequence.			-2072
chr2	158557230	158557530	hit	0.012	0.746	12	153.45	5	162.95	11.7	13	1536	hit	Arhgap40	NM_001145015	NP_001138487	Mus musculus Rho GTPase activating protein 40 (Arhgap40), mRNA.			44434
chr15	36506150	36506450	hit	0.036	0.798	8	153.25	7.8	151.35	11	16	635	hit	Ankrd46	NM_175134	NP_780343	Mus musculus ankyrin repeat domain 46 (Ankrd46), mRNA.			-9359
chr13	111510630	111510930	hit	0.038	0.802	7	153.2	6.3	105.4	14	7	2567	hit	Gpbp1	NM_001122963;NM_028487	NP_001116435;NP_082763	Mus musculus GC-rich promoter binding protein 1 (Gpbp1), transcript variant 1, mRNA.;Mus musculus GC-rich promoter binding protein 1 (Gpbp1), transcript variant 2, mRNA.			-20589
chr19	55380710	55381010	hit	0.036	0.62	22.6	152.8	5	121.2	16	18.7	3608	hit	Vti1a	NM_001293685;NM_001293686;NM_016862	NP_001280614;NP_001280615;NP_058558	Mus musculus vesicle transport through interaction with t-SNAREs 1A (Vti1a), transcript variant 1, mRNA.;Mus musculus vesicle transport through interaction with t-SNAREs 1A (Vti1a), transcript variant 2, mRNA.;Mus musculus vesicle transport through interaction with t-SNAREs 1A (Vti1a), transcript variant 3, mRNA.			64653
chrX	153723130	153723430	hit	0.042	0.634	7	152.75	5.3	130.45	7.4	4	3103	hit	2210013O21Rik	NM_027327	NP_081603	Mus musculus RIKEN cDNA 2210013O21 gene (2210013O21Rik), mRNA.			-123
chr4	99121040	99121340	hit	0.13	0.964	8.7	152.5	4.25	136.15	22.4	11	17564	hit	Dock7	NM_001290636;NM_026082	NP_001277565;NP_080358	Mus musculus dedicator of cytokinesis 7 (Dock7), transcript variant 1, mRNA.;Mus musculus dedicator of cytokinesis 7 (Dock7), transcript variant 2, mRNA.			-125
chr10	116409050	116409350	hit	0.018	0.62	4	152.1	2.85	111.2	8	8	262	hit	Kcnmb4os1	NR_028107		Mus musculus potassium large conductance calcium-activated channel, subfamily M, beta member 4, opposite strand 1 (Kcnmb4os1), long non-coding RNA.			-8770
chr19	9136290	9136590	hit	0.012	0.634	15	152.1	3	117.55	21.65	21.6	476	hit	Asrgl1	NM_025610	NP_079886	Mus musculus asparaginase like 1 (Asrgl1), mRNA.			-724
chr11	77930120	77930420	hit	0.016	0.742	7	151.9	2	109.95	21.25	13.8	827	hit	Sez6	;NM_001291225;NM_021286	;NP_001278154;NP_067261	Mus musculus seizure related gene 6 (Sez6), transcript variant 1, mRNA.;Mus musculus seizure related gene 6 (Sez6), transcript variant 2, mRNA.			-418
chr12	109526260	109526560	hit	0.046	0.81	5	151.45	4	129.9	20.15	3	1380	hit	Meg3	;NR_027651;NR_027652		Mus musculus maternally expressed 3 (Meg3), transcript variant 2, long non-coding RNA.;Mus musculus maternally expressed 3 (Meg3), transcript variant 3, long non-coding RNA.			-14435
chr12	109527870	109528170	hit	0.064	0.746	11.65	151.05	6.55	111.45	15.95	2	3194	hit	Meg3	;NR_027651;NR_027652		Mus musculus maternally expressed 3 (Meg3), transcript variant 2, long non-coding RNA.;Mus musculus maternally expressed 3 (Meg3), transcript variant 3, long non-coding RNA.			-12825
chr11	77930010	77930310	hit	0.014	0.728	6	150.25	2.15	108.85	23.7	14.55	524	hit	Sez6	;NM_001291225;NM_021286	;NP_001278154;NP_067261	Mus musculus seizure related gene 6 (Sez6), transcript variant 1, mRNA.;Mus musculus seizure related gene 6 (Sez6), transcript variant 2, mRNA.			-528
chr16	77041250	77041550	hit	0.014	0.614	8	150.05	5	105	8.45	7	630	hit	Usp25	NM_013918	NP_038946	Mus musculus ubiquitin specific peptidase 25 (Usp25), mRNA.			27181
chr7	127042920	127043220	hit	0.01	0.68	9.7	149.75	2.55	117.2	19.45	18.75	1097	hit	Kif22	NM_145588	NP_663563	Mus musculus kinesin family member 22 (Kif22), mRNA.			-500
chr11	62847560	62847860	hit	0.022	0.786	10.9	149.35	8.05	132.55	9	14.75	1249	hit	Fbxw10	;NM_001033669;NM_001291441	;NP_001028841;NP_001278370	Mus musculus F-box and WD-40 domain protein 10 (Fbxw10), transcript variant 1, mRNA.;Mus musculus F-box and WD-40 domain protein 10 (Fbxw10), transcript variant 2, mRNA.			437
chr13	112469530	112469830	hit	0.014	0.584	15.35	149.35	2	91.3	18.7	9.25	424	hit	Il6st	;NM_010560	;NP_034690	Mus musculus interleukin 6 signal transducer (Il6st), mRNA.			5460
chrX	49797100	49797400	hit	0.03	0.762	6	148.85	2	128	20	11.8	3608	hit	Igsf1	NM_177591;NM_177915	NP_808583;NP_899179	Mus musculus immunoglobulin superfamily, member 1 (Igsf1), transcript variant 1, mRNA.;Mus musculus immunoglobulin superfamily, member 1 (Igsf1), transcript variant 2, mRNA.			344
chr17	74943290	74943590	hit	0.018	0.726	10.8	148.65	3	95.4	19.15	5.3	531	hit	Ltbp1	NM_019919	NP_064303	Mus musculus latent transforming growth factor beta binding protein 1 (Ltbp1), transcript variant 1, mRNA.			-61938
chr11	119043960	119044260	hit	0.02	0.796	12.45	148.6	2.15	109.4	32.55	21.2	6579	hit	Cbx8	NM_013926	NP_038954	Mus musculus chromobox 8 (Cbx8), mRNA.			-3047
chr6	127251530	127251830	hit	0.02	0.822	9.3	148.6	5.05	77.55	19.15	5	3673	hit	D130058E03	NR_073373		Mus musculus uncharacterized D130058E03 (D130058E03), long non-coding RNA.			56136
chr2	91978520	91978820	hit	0.004	0.796	18.2	148.45	6	155.8	9.1	14.3	2133	hit	Dgkz	NM_138306	NP_612179	Mus musculus diacylglycerol kinase zeta (Dgkz), transcript variant 2, mRNA.			-12920
chr12	84175300	84175600	hit	0.032	0.802	18.4	148.45	2	91.7	19.3	9.4	3570	hit	Elmsan1	NM_001163502	NP_001156974	Mus musculus ELM2 and Myb/SANT-like domain containing 1 (Elmsan1), transcript variant 1, mRNA.			18414
chr14	66281930	66282230	hit	0.012	0.692	13.1	148.3	7.15	78.3	20.6	23.05	626	hit	Ptk2b	NM_001162365;NM_172498	NP_001155837;NP_766086	Mus musculus PTK2 protein tyrosine kinase 2 beta (Ptk2b), transcript variant 2, mRNA.;Mus musculus PTK2 protein tyrosine kinase 2 beta (Ptk2b), transcript variant 3, mRNA.			-878
chr2	119146810	119147110	hit	0.03	0.762	10.5	148.15	1.8	99.5	12.55	9.1	476	hit	Rmdn3	NM_001033136	NP_001028308	Mus musculus regulator of microtubule dynamics 3 (Rmdn3), mRNA.			9923
chr16	94125960	94126260	hit	0.086	0.896	6	148	1	140	11.75	10.8	3629	hit	Sim2			Mus musculus single-minded homolog 2 (Drosophila) (Sim2), mRNA.			3357
chr12	29534380	29534680	hit	0.034	0.756	8.4	148	1	135.4	12.7	9.7	3018	hit	Myt1l	NM_001093776	NP_032692	Mus musculus myelin transcription factor 1-like (Myt1l), transcript variant 3, mRNA.			-224
chr10	71268330	71268630	hit	0.014	0.65	8	147.9	8	107.2	11	11.45	617	hit	Ube2d1	NM_145420	NP_663395	Mus musculus ubiquitin-conjugating enzyme E2D 1 (Ube2d1), mRNA.			16631
chr14	57913730	57914030	hit	0.012	0.682	24	147.75	9	111.4	22.4	10	563	hit	Zdhhc20	NM_029492	NP_083768	Mus musculus zinc finger, DHHC domain containing 20 (Zdhhc20), mRNA.			-23468
chr14	66634370	66634670	hit	0.024	0.62	6	147.75	2	109.2	15.35	13.9	295	hit	Adra1a	NM_001271759;NM_001271760;NM_001271761;NM_013461	NP_001258688;NP_001258690;NP_038489	Mus musculus adrenergic receptor, alpha 1a (Adra1a), transcript variant 1, mRNA.;Mus musculus adrenergic receptor, alpha 1a (Adra1a), transcript variant 2, mRNA.;Mus musculus adrenergic receptor, alpha 1a (Adra1a), transcript variant 3, mRNA.;Mus musculus adrenergic receptor, alpha 1a (Adra1a), transcript variant 4, mRNA.			-580
chr8	114205630	114205930	hit	0.086	0.928	6.15	147.7	2	122.35	10.75	19.1	10566	hit	Vat1l	NM_173016	NP_766604	Mus musculus vesicle amine transport protein 1 homolog-like (T. californica) (Vat1l), mRNA.			0
chr4	151483230	151483530	hit	0.03	0.676	18.8	147.55	10	64.9	33.25	26.2	5504	hit	AK017048			Mus musculus adult male testis cDNA, RIKEN full-length enriched library, clone:4933433O19 product:unclassifiable, full insert sequence.			106760
chr12	111486550	111486850	hit	0.034	0.774	10.25	147.5	5	108.55	10.4	8.9	3573	hit	Gm266	NM_001033248	NP_001028420	Mus musculus predicted gene 266 (Gm266), mRNA.			-727
chr3	135499320	135499620	hit	0.01	0.67	8.8	147.25	4	95.5	14	14.85	487	hit	Manba	;NM_027288	;NP_081564	Mus musculus mannosidase, beta A, lysosomal (Manba), mRNA.			13709
chr16	34657980	34658280	hit	0.034	0.706	20.45	147	7.65	105.45	14	13.2	2377	hit	Ropn1	NM_030744	NP_109669	Mus musculus ropporin, rhophilin associated protein 1 (Ropn1), mRNA.			6769
chr14	54686580	54686880	hit	0.13	0.968	23.7	146.95	8.35	119.65	33.75	28.05	54883	hit	Acin1	NM_001085473;NM_023190	NP_001078942;NP_075679	Mus musculus apoptotic chromatin condensation inducer 1 (Acin1), transcript variant 2, mRNA.;Mus musculus apoptotic chromatin condensation inducer 1 (Acin1), transcript variant 4, mRNA.			50
chr11	69072920	69073220	hit	0.042	0.698	20.1	146.85	6.35	164.45	28.4	24	12799	hit	Tmem107	NM_025838;NM_028336	NP_080114;NP_082612	Mus musculus transmembrane protein 107 (Tmem107), transcript variant 1, mRNA.;Mus musculus transmembrane protein 107 (Tmem107), transcript variant 2, mRNA.			2111
chr17	74943360	74943660	hit	0.016	0.714	10.4	146.65	3	99.05	21.15	6.25	639	hit	Ltbp1	NM_019919	NP_064303	Mus musculus latent transforming growth factor beta binding protein 1 (Ltbp1), transcript variant 1, mRNA.			-61868
chr3	85593560	85593860	hit	0.018	0.664	18	146.6	3	59.5	18.25	11	346	hit	Gatb	;NM_144896	;NP_659145	Mus musculus glutamyl-tRNA(Gln) amidotransferase, subunit B (Gatb), mRNA.			19431
chr8	128944190	128944490	hit	0.014	0.486	6	146.2	3	62.85	6.75	11.95	132	hit	Ccdc7	NM_001197041;NM_029061	NP_001183970;NP_083337	Mus musculus coiled-coil domain containing 7 (Ccdc7), transcript variant 1, mRNA.;Mus musculus coiled-coil domain containing 7 (Ccdc7), transcript variant 2, mRNA.			121001
chr16	34657880	34658180	hit	0.034	0.74	19.35	146	10	101.4	16.3	12.75	2458	hit	Ropn1	NM_030744	NP_109669	Mus musculus ropporin, rhophilin associated protein 1 (Ropn1), mRNA.			6669
chr14	31338140	31338440	hit	0.014	0.652	9	145.75	5.05	97.3	17.5	2	775	hit	Capn7	;NM_009796	;NP_033926	Mus musculus calpain 7 (Capn7), mRNA.			1416
chr11	120950190	120950490	hit	0.04	0.87	12.3	145.65	3.85	124.4	18.4	4.45	5411	hit	Slc16a3	NM_001038653;NM_001038654	NP_109621	Mus musculus solute carrier family 16 (monocarboxylic acid transporters), member 3 (Slc16a3), mRNA.			1123
chr18	67088270	67088570	hit	0.148	1.062	8.4	145.55	1.1	132.1	13.85	9.7	13252	hit	Gnal	NM_177137	NP_796111	Mus musculus guanine nucleotide binding protein, alpha stimulating, olfactory type (Gnal), transcript variant 2, mRNA.			0
chr3	27711580	27711880	hit	0.03	0.618	10.45	145.4	5.45	88.8	7.1	11	800	hit	Fndc3b			Mus musculus fibronectin type III domain containing 3B (Fndc3b), mRNA.			-273
chr7	144943220	144943520	hit	0.112	0.97	15.35	145.25	5	179.05	28.45	18.7	25010	hit	Ccnd1	NM_007631	NP_031657	Mus musculus cyclin D1 (Ccnd1), mRNA.			-3295
chr14	105676850	105677150	hit	0.018	0.652	4.2	145.25	4.25	94.2	19.2	19.3	730	hit	AK045385			Mus musculus adult male corpora quadrigemina cDNA, RIKEN full-length enriched library, clone:B230112B02 product:unclassifiable, full insert sequence.			-33125
chr18	69671080	69671380	hit	0.014	0.604	11.35	145.05	2.95	68.95	4.85	16.1	418	hit	Tcf4	NM_001083967;NM_013685	NP_001077436;NP_038713	Mus musculus transcription factor 4 (Tcf4), transcript variant 1, mRNA.;Mus musculus transcription factor 4 (Tcf4), transcript variant 2, mRNA.			77654
chr3	122984020	122984320	hit	0.14	1.01	19.7	144.95	6	137.85	21.5	22.05	28002	hit	Usp53	;NM_133857	;NP_598618	Mus musculus ubiquitin specific peptidase 53 (Usp53), mRNA.			126
chr9	36726060	36726360	hit	0.066	0.88	25.6	144.95	6	126.65	29.95	23.9	17268	hit	Chek1	NM_007691	NP_031717	Mus musculus checkpoint kinase 1 (Chek1), mRNA.			13
chr5	35054190	35054490	hit	0.026	0.796	17.65	144.9	4.7	124	14.05	9.6	769	hit	Dok7	NM_172708	NP_766296	Mus musculus docking protein 7 (Dok7), mRNA.			-2322
chr11	109667540	109667840	hit	0.05	0.744	9.8	144.65	8.1	113.6	13.85	13.6	510	hit	Prkar1a	NM_021880	NP_068680	Mus musculus protein kinase, cAMP dependent regulatory, type I, alpha (Prkar1a), mRNA.			16591
chr10	24915460	24915760	hit	0.024	0.656	7.4	144.55	3	104.6	17.7	9.1	315	hit	Mir6905	NR_105870		Mus musculus microRNA 6905 (Mir6905), microRNA.			4796
chr9	106202780	106203080	hit	0.122	0.998	29.5	144.4	10.7	116.85	38.6	21.75	40391	hit	Twf2	NM_011876	NP_036006	Mus musculus twinfilin, actin-binding protein, homolog 2 (Drosophila) (Twf2), mRNA.			-27
chr11	120950400	120950700	hit	0.05	0.868	11.35	144.25	2	144.15	15.2	9	11570	hit	Slc16a3	NM_001038653;NM_001038654	NP_109621	Mus musculus solute carrier family 16 (monocarboxylic acid transporters), member 3 (Slc16a3), mRNA.			1333
chr8	95523110	95523410	hit	0.018	0.638	12.45	143.95	2	88.45	20.75	7.15	155	hit	AB349653			Mus musculus non-coding RNA, oocyte_piRNA469, complete sequence.			2587
chr13	111509260	111509560	hit	0.024	0.69	18.9	143.9	7.25	125.2	12.75	8	5606	hit	Gpbp1	NM_001122963;NM_028487	NP_001116435;NP_082763	Mus musculus GC-rich promoter binding protein 1 (Gpbp1), transcript variant 1, mRNA.;Mus musculus GC-rich promoter binding protein 1 (Gpbp1), transcript variant 2, mRNA.			-19219
chr6	100438290	100438590	hit	0.026	0.796	6.1	143.9	5.1	187.9	30.2	17.75	5489	hit	1700049E22Rik	NR_040525		Mus musculus RIKEN cDNA 1700049E22 gene (1700049E22Rik), long non-coding RNA.			-88809
chr5	74941080	74941380	hit	0.022	0.744	11.15	143.4	10.95	98.3	4.45	15	2532	hit	Gm6116	NR_045866		Mus musculus predicted gene 6116 (Gm6116), long non-coding RNA.			-7813
chr15	36505630	36505930	hit	0.02	0.728	24.15	143.05	13.15	121.9	35.15	32.45	3914	hit	Ankrd46	NM_175134	NP_780343	Mus musculus ankyrin repeat domain 46 (Ankrd46), mRNA.			-8839
chr4	116144930	116145230	hit	0.012	0.686	20.95	143.05	1.45	92.55	11.4	11.7	1891	hit	Lurap1	NM_026547	NP_080823	Mus musculus leucine rich adaptor protein 1 (Lurap1), mRNA.			-314
chr2	78927970	78928270	hit	0.016	0.6	2	142.95	3.4	76.5	8.8	9	527	hit	Ube2e3	NM_009454	NP_033480	Mus musculus ubiquitin-conjugating enzyme E2E 3 (Ube2e3), mRNA.			58923
chr7	66693620	66693920	hit	0.01	0.65	4	142.9	3.95	52.7	14.3	10.8	495	hit	Lins	;NM_001191001;NM_152815;NR_034030	;NP_001177930;NP_690028	Mus musculus lines homolog (Drosophila) (Lins), transcript variant 1, mRNA.;Mus musculus lines homolog (Drosophila) (Lins), transcript variant 2, mRNA.;Mus musculus lines homolog (Drosophila) (Lins), transcript variant 3, non-coding RNA.			3731
chr14	66635340	66635640	hit	0.07	0.814	8.55	142.9	5	120.6	13.45	8	6139	hit	Adra1a	NM_001271759;NM_001271760;NM_001271761;NM_013461	NP_001258688;NP_001258690;NP_038489	Mus musculus adrenergic receptor, alpha 1a (Adra1a), transcript variant 1, mRNA.;Mus musculus adrenergic receptor, alpha 1a (Adra1a), transcript variant 2, mRNA.;Mus musculus adrenergic receptor, alpha 1a (Adra1a), transcript variant 3, mRNA.;Mus musculus adrenergic receptor, alpha 1a (Adra1a), transcript variant 4, mRNA.			89
chr9	40821700	40822000	hit	0.042	0.79	16.4	142.85	8.15	135	16.2	15.9	5557	hit	Hspa8	;NM_031165	;NP_112442	Mus musculus heat shock protein 8 (Hspa8), mRNA.			20427
chr6	100438200	100438500	hit	0.024	0.826	5.8	142.55	7.3	187.05	20.55	20.8	3909	hit	1700049E22Rik	NR_040525		Mus musculus RIKEN cDNA 1700049E22 gene (1700049E22Rik), long non-coding RNA.			-88899
chr8	114204880	114205180	hit	0.04	0.806	11.95	142.3	7.85	82.7	14.95	14.55	2348	hit	Vat1l	NM_173016	NP_766604	Mus musculus vesicle amine transport protein 1 homolog-like (T. californica) (Vat1l), mRNA.			-459
chr3	82369630	82369930	hit	0.036	0.78	12.65	142.2	6	97.95	14.45	6.8	316	hit	Map9	NM_001081230	NP_001074699	Mus musculus microtubule-associated protein 9 (Map9), mRNA.			11443
chr13	64122060	64122360	hit	0.01	0.594	8	142.1	5.55	122.75	8.95	13.85	169	hit	Slc35d2	;NM_001001321	;NP_001001321	Mus musculus solute carrier family 35, member D2 (Slc35d2), mRNA.			6969
chr10	59878510	59878810	hit	0.012	0.662	10.9	142	9.5	77.8	6.65	6.95	654	hit	Dnajb12	;NM_019965	;NP_064349	Mus musculus DnaJ (Hsp40) homolog, subfamily B, member 12 (Dnajb12), mRNA.			-780
chr10	127584720	127585020	hit	0.042	0.874	11.55	141.8	6	84.05	10.9	10.25	660	hit	Lrp1	;NM_008512	;NP_032538	Mus musculus low density lipoprotein receptor-related protein 1 (Lrp1), mRNA.			36127
chr18	36939080	36939380	hit	0.056	0.722	13.7	141.55	5	118.15	16.55	28	492	hit	Pcdha2	NM_198117	NP_932785	Mus musculus protocadherin alpha 2 (Pcdha2), mRNA.			0
chr13	102992870	102993170	hit	0.016	0.66	9.15	141.3	6	94.7	5	9	297	hit	Mast4			Mus musculus microtubule associated serine/threonine kinase family member 4 (Mast4), mRNA.			-205421
chr5	115272050	115272350	hit	0.108	0.918	10.85	141.05	4	137.1	28.15	10	8252	hit	Rnf10	NM_001302448;NM_001302449;NM_016698	NP_001289377;NP_001289378;NP_057907	Mus musculus ring finger protein 10 (Rnf10), transcript variant 1, mRNA.;Mus musculus ring finger protein 10 (Rnf10), transcript variant 2, mRNA.;Mus musculus ring finger protein 10 (Rnf10), transcript variant 3, mRNA.			544
chr1	89690040	89690340	hit	0.026	0.692	5.75	140.65	8	102.95	15.1	6	954	hit	4933400F21Rik	;NR_015540		Mus musculus RIKEN cDNA 4933400F21 gene (4933400F21Rik), long non-coding RNA.			-6148
chr19	5394310	5394610	hit	0.028	0.826	6	140.4	4	111.7	17.8	6.5	1730	hit	Tsga10ip			SubName: Full=Protein Tsga10ip ;			0
chr18	36938430	36938730	hit	0.018	0.492	2.65	140.3	1.95	89.45	1	16.7	54	hit	Pcdha2	NM_198117	NP_932785	Mus musculus protocadherin alpha 2 (Pcdha2), mRNA.			-474
chr4	80910650	80910950	hit	0.05	0.738	18.5	140.05	6.75	144.85	15.7	8.9	5321	hit	Lurap1l	NM_026821	NP_081097	Mus musculus leucine rich adaptor protein 1-like (Lurap1l), mRNA.			0
chr2	60142060	60142360	hit	0.014	0.688	13.15	140	8.8	137	22.8	13.5	1169	hit	Baz2b	;NM_001001182	;NP_001001182	Mus musculus bromodomain adjacent to zinc finger domain, 2B (Baz2b), mRNA.			-16250
chr19	5394170	5394470	hit	0.034	0.824	3.75	140	2	93.9	4.7	8.95	1607	hit	Tsga10ip			SubName: Full=Protein Tsga10ip ;			0
chrX	153723000	153723300	hit	0.03	0.586	5	139.9	1.1	107.05	6	7.65	2088	hit	2210013O21Rik	NM_027327	NP_081603	Mus musculus RIKEN cDNA 2210013O21 gene (2210013O21Rik), mRNA.			-253
chr2	152574380	152574680	hit	0.02	0.72	11.2	139.85	6	103.55	12.05	6.85	675	hit	Defb21	NM_207276	NP_997159	Mus musculus defensin beta 21 (Defb21), mRNA.			1636
chr12	109527950	109528250	hit	0.074	0.76	10.5	139.65	5.9	103.4	15.5	4.9	3460	hit	Meg3	;NR_027651;NR_027652		Mus musculus maternally expressed 3 (Meg3), transcript variant 2, long non-coding RNA.;Mus musculus maternally expressed 3 (Meg3), transcript variant 3, long non-coding RNA.			-12745
chr5	118373620	118373920	hit	0.052	0.81	11.05	139.6	6.55	135.35	20.65	10.65	6867	hit	2410131K14Rik	NM_001081236	NP_001074705	Mus musculus RIKEN cDNA 2410131K14 gene (2410131K14Rik), mRNA.			128393
chr12	111486380	111486680	hit	0.052	0.842	14.35	139.55	8.55	85.4	15.55	12.95	4913	hit	Gm266	NM_001033248	NP_001028420	Mus musculus predicted gene 266 (Gm266), mRNA.			-557
chr4	116144140	116144440	hit	0.092	0.934	14.9	138.75	2	78.2	12.05	16.35	6933	hit	Lurap1	NM_026547	NP_080823	Mus musculus leucine rich adaptor protein 1 (Lurap1), mRNA.			175
chr16	48580930	48581230	hit	0.034	0.696	6.75	138.35	3	82.25	31.15	18.45	7	hit	Morc1			Mus musculus microrchidia 1 (Morc1), mRNA.			-30473
chr8	88115220	88115520	hit	0.002	0.562	4	138.3	6.65	75.5	4.8	13	163	hit	AK077166			Mus musculus adult male testis cDNA, RIKEN full-length enriched library, clone:4933416K23 product:unclassifiable, full insert sequence.			3086
chr19	9136200	9136500	hit	0.012	0.65	12.9	138.25	5.45	119.55	13.9	13.95	770	hit	Asrgl1	NM_025610	NP_079886	Mus musculus asparaginase like 1 (Asrgl1), mRNA.			-634
chr18	69671160	69671460	hit	0.016	0.612	10	138.25	3.5	71.35	5.05	15.35	412	hit	Tcf4	NM_001083967;NM_013685	NP_001077436;NP_038713	Mus musculus transcription factor 4 (Tcf4), transcript variant 1, mRNA.;Mus musculus transcription factor 4 (Tcf4), transcript variant 2, mRNA.			77734
chr1	182280530	182280830	hit	0.032	0.72	14	138.1	6.9	54.85	17.55	19.6	898	hit	Degs1	NM_007853	NP_031879	Mus musculus degenerative spermatocyte homolog 1 (Drosophila) (Degs1), mRNA.			1928
chr10	115571660	115571960	hit	0.016	0.55	2	138	4	117.95	8.45	7.25	619	hit	A930009A15Rik	NM_029982	NP_084258	Mus musculus RIKEN cDNA A930009A15 gene (A930009A15Rik), mRNA.			1674
chr1	65185700	65186000	hit	0.026	0.676	26.5	137.45	13	112.95	15.4	29.35	2485	hit	Idh1	NM_001111320	NP_034627	Mus musculus isocitrate dehydrogenase 1 (NADP+), soluble (Idh1), transcript variant 1, mRNA.			478
chr9	40820800	40821100	hit	0.014	0.636	13.55	136.6	8.1	94.6	18.1	9.6	572	hit	Hspa8	;NM_031165	;NP_112442	Mus musculus heat shock protein 8 (Hspa8), mRNA.			19527
chr7	49521500	49521800	hit	0.018	0.796	22	136.3	10.6	129.9	19.95	12.8	3985	hit	AK088944			Mus musculus 2 days neonate thymus thymic cells cDNA, RIKEN full-length enriched library, clone:E430032N19 product:unclassifiable, full insert sequence.			-32091
chr19	4854720	4855020	hit	0.062	0.804	19.95	136.2	10.3	78.95	10.1	21.75	7879	hit	Ctsf	NM_019861	NP_063914	Mus musculus cathepsin F (Ctsf), mRNA.			-108
chr15	48788810	48789110	hit	0.01	0.714	11.55	136.15	2	85.55	10	8.85	486	hit	Csmd3	;NM_001081391	;NP_001074860	Mus musculus CUB and Sushi multiple domains 3 (Csmd3), mRNA.			2878
chr19	9136710	9137010	hit	0.008	0.65	9.45	135.9	6.15	99.4	14	14.65	342	hit	Asrgl1	NM_025610	NP_079886	Mus musculus asparaginase like 1 (Asrgl1), mRNA.			-1144
chr6	125166160	125166460	hit	0.04	0.892	19.1	135.9	10.45	112.05	12	17.5	14538	hit	Gapdh	NM_001289726	NP_001276655	Mus musculus glyceraldehyde-3-phosphate dehydrogenase (Gapdh), transcript variant 1, mRNA.			6
chr4	133241580	133241880	hit	0.08	0.894	33.6	135.75	11.3	144.45	24.05	26	19671	hit	Map3k6	NM_016693	NP_057902	Mus musculus mitogen-activated protein kinase kinase kinase 6 (Map3k6), mRNA.			762
chr18	69671040	69671340	hit	0.012	0.618	9	135.65	3	67.45	4	12.45	366	hit	Tcf4	NM_001083967;NM_013685	NP_001077436;NP_038713	Mus musculus transcription factor 4 (Tcf4), transcript variant 1, mRNA.;Mus musculus transcription factor 4 (Tcf4), transcript variant 2, mRNA.			77614
chr17	74945070	74945370	hit	0.02	0.738	16	135.55	7.45	105.65	16.2	7.45	290	hit	Ltbp1	NM_019919	NP_064303	Mus musculus latent transforming growth factor beta binding protein 1 (Ltbp1), transcript variant 1, mRNA.			-60158
chr12	109528000	109528300	hit	0.074	0.77	11.65	135.5	5.5	92.8	12.25	4	2781	hit	Meg3	;NR_027651;NR_027652		Mus musculus maternally expressed 3 (Meg3), transcript variant 2, long non-coding RNA.;Mus musculus maternally expressed 3 (Meg3), transcript variant 3, long non-coding RNA.			-12695
chr18	67087560	67087860	hit	0.032	0.772	10	135.45	11.05	95.25	18.55	14	875	hit	Gnal	NM_177137	NP_796111	Mus musculus guanine nucleotide binding protein, alpha stimulating, olfactory type (Gnal), transcript variant 2, mRNA.			-437
chr2	60142230	60142530	hit	0.016	0.68	15.55	135.2	10	127.5	25.8	12.75	1456	hit	Baz2b	;NM_001001182	;NP_001001182	Mus musculus bromodomain adjacent to zinc finger domain, 2B (Baz2b), mRNA.			-16420
chr16	90443640	90443940	hit	0.034	0.694	9	135.15	2.8	87.95	10.05	14	1627	hit	AK033811			Mus musculus adult male epididymis cDNA, RIKEN full-length enriched library, clone:9230112I12 product:unclassifiable, full insert sequence.			2985
chr11	62847710	62848010	hit	0.016	0.748	9	135.15	3.85	137.8	20.5	14.15	1386	hit	Fbxw10	;NM_001033669;NM_001291441	;NP_001028841;NP_001278370	Mus musculus F-box and WD-40 domain protein 10 (Fbxw10), transcript variant 1, mRNA.;Mus musculus F-box and WD-40 domain protein 10 (Fbxw10), transcript variant 2, mRNA.			587
chr11	97116090	97116390	hit	0.032	0.77	18.5	134.75	3	118.05	9	7.5	1270	hit	Tbx21	NM_019507	NP_062380	Mus musculus T-box 21 (Tbx21), mRNA.			-759
chr9	78552460	78552760	hit	0.034	0.736	10.65	134.6	3.85	86.75	16.1	15.35	574	hit	Slc17a5	;NM_001276452;NM_172773	;NP_001263381;NP_766361	Mus musculus solute carrier family 17 (anion/sugar transporter), member 5 (Slc17a5), transcript variant 1, mRNA.;Mus musculus solute carrier family 17 (anion/sugar transporter), member 5 (Slc17a5), transcript variant 2, mRNA.			35284
chr19	9135320	9135620	hit	0.086	0.916	13.45	134.55	8	145.7	19.35	12.75	18619	hit	Asrgl1	NM_025610	NP_079886	Mus musculus asparaginase like 1 (Asrgl1), mRNA.			0
chr13	64121940	64122240	hit	0.004	0.544	8.75	134.55	5.55	108.4	4.55	15.05	231	hit	Slc35d2	;NM_001001321	;NP_001001321	Mus musculus solute carrier family 35, member D2 (Slc35d2), mRNA.			7089
chr17	47925070	47925370	hit	0.082	0.936	12.2	134.4	4.3	126.4	14.4	13.3	14799	hit	Foxp4	;NM_001110824;NM_001110825;NM_028767	;NP_001104294;NP_001104295;NP_083043	Mus musculus forkhead box P4 (Foxp4), transcript variant 1, mRNA.;Mus musculus forkhead box P4 (Foxp4), transcript variant 2, mRNA.;Mus musculus forkhead box P4 (Foxp4), transcript variant 3, mRNA.			-438
chr3	51524620	51524920	hit	0.024	0.79	9.9	134.3	2	139.65	9.25	14	747	hit	AK037895			Mus musculus 16 days neonate thymus cDNA, RIKEN full-length enriched library, clone:A130060I07 product:SET domain-containing protein 7, full insert sequence.			26399
chr10	79614020	79614320	hit	0.1	0.992	24.3	134.1	9	111.05	31.7	24.3	27742	hit	C2cd4c	NM_001168624	NP_941016	Mus musculus C2 calcium-dependent domain containing 4C (C2cd4c), transcript variant 2, mRNA.			0
chr13	111510750	111511050	hit	0.04	0.834	4	133.9	5	91.6	14.4	10	3104	hit	Gpbp1	NM_001122963;NM_028487	NP_001116435;NP_082763	Mus musculus GC-rich promoter binding protein 1 (Gpbp1), transcript variant 1, mRNA.;Mus musculus GC-rich promoter binding protein 1 (Gpbp1), transcript variant 2, mRNA.			-20709
chr8	95522930	95523230	hit	0.016	0.592	10.3	133.35	3.55	62.05	8.2	13.7	103	hit	AB349653			Mus musculus non-coding RNA, oocyte_piRNA469, complete sequence.			2407
chr11	120950110	120950410	hit	0.038	0.85	13.6	133.3	3	112.05	20.95	2.8	4889	hit	Slc16a3	NM_001038653;NM_001038654	NP_109621	Mus musculus solute carrier family 16 (monocarboxylic acid transporters), member 3 (Slc16a3), mRNA.			1043
chr5	74940800	74941100	hit	0.008	0.736	11.9	133.25	10.3	64.85	21.75	5.7	913	hit	Gm6116	NR_045866		Mus musculus predicted gene 6116 (Gm6116), long non-coding RNA.			-8093
chr12	85365950	85366250	hit	0.01	0.678	14.25	133.25	3	88.45	9	13.6	326	hit	Tmed10	NM_026775	NP_081051	Mus musculus transmembrane emp24-like trafficking protein 10 (yeast) (Tmed10), mRNA.			8466
chr3	82369700	82370000	hit	0.036	0.772	7.9	133.1	4.9	81.6	12.25	7	284	hit	Map9	NM_001081230	NP_001074699	Mus musculus microtubule-associated protein 9 (Map9), mRNA.			11513
chr13	102993310	102993610	hit	0.022	0.72	10.65	133.05	2.05	86.25	12.1	7	242	hit	Mast4			Mus musculus microtubule associated serine/threonine kinase family member 4 (Mast4), mRNA.			-205861
chr1	120358100	120358400	hit	0.058	0.782	4	133.05	2	73.75	8.5	14	1831	hit	C1ql2	NM_207233	NP_997116	Mus musculus complement component 1, q subcomponent-like 2 (C1ql2), mRNA.			17518
chr14	105676950	105677250	hit	0.018	0.636	5	133	6.05	79.8	10.75	13.1	474	hit	AK045385			Mus musculus adult male corpora quadrigemina cDNA, RIKEN full-length enriched library, clone:B230112B02 product:unclassifiable, full insert sequence.			-33225
chr13	64124530	64124830	hit	0.014	0.684	8.2	132.85	4.4	89.5	12.15	9	435	hit	Slc35d2	;NM_001001321	;NP_001001321	Mus musculus solute carrier family 35, member D2 (Slc35d2), mRNA.			4499
chr11	77929810	77930110	hit	0.01	0.732	3	132.7	2	91.15	17.5	10.2	317	hit	Gm11190	NR_033549		Mus musculus predicted gene 11190 (Gm11190), long non-coding RNA.			-522
chr12	10584050	10584350	hit	0.032	0.696	2	132.65	6.4	68	15.2	9.8	322	hit	AB335643			Mus musculus non-coding RNA, oocyte_clustered_small_RNA844, complete sequence.			-84078
chr8	123806000	123806300	hit	0.1	0.978	17.7	132.6	2.95	111.9	17.75	24.85	22127	hit	Rab4a	NM_009003	NP_033029	Mus musculus RAB4A, member RAS oncogene family (Rab4a), mRNA.			4
chr14	66634300	66634600	hit	0.018	0.62	7.25	132.6	2	79.3	14.05	12.8	224	hit	Adra1a	NM_001271759;NM_001271760;NM_001271761;NM_013461	NP_001258688;NP_001258690;NP_038489	Mus musculus adrenergic receptor, alpha 1a (Adra1a), transcript variant 1, mRNA.;Mus musculus adrenergic receptor, alpha 1a (Adra1a), transcript variant 2, mRNA.;Mus musculus adrenergic receptor, alpha 1a (Adra1a), transcript variant 3, mRNA.;Mus musculus adrenergic receptor, alpha 1a (Adra1a), transcript variant 4, mRNA.			-650
chr17	74944960	74945260	hit	0.02	0.728	16.05	132.5	7.45	93.45	15.3	6	283	hit	Ltbp1	NM_019919	NP_064303	Mus musculus latent transforming growth factor beta binding protein 1 (Ltbp1), transcript variant 1, mRNA.			-60268
chr8	88115100	88115400	hit	0.006	0.6	7.35	132.5	5.9	63.35	0	9.4	213	hit	AK077166			Mus musculus adult male testis cDNA, RIKEN full-length enriched library, clone:4933416K23 product:unclassifiable, full insert sequence.			3206
chr13	64124600	64124900	hit	0.016	0.67	7	132.3	3	95.45	11.8	8	387	hit	Slc35d2	;NM_001001321	;NP_001001321	Mus musculus solute carrier family 35, member D2 (Slc35d2), mRNA.			4429
chr8	106289510	106289810	hit	0.018	0.744	25.3	132.2	12.45	123.65	18.8	26.5	1789	hit	4930506A18Rik	NR_126090;NR_126091		Mus musculus RIKEN cDNA 4930506A18 gene (4930506A18Rik), transcript variant 1, long non-coding RNA.;Mus musculus RIKEN cDNA 4930506A18 gene (4930506A18Rik), transcript variant 2, long non-coding RNA.			7281
chr19	5394030	5394330	hit	0.038	0.836	9.8	132.1	2	95.2	3	8.5	1502	hit	Tsga10ip			SubName: Full=Protein Tsga10ip ;			70
chr11	120950050	120950350	hit	0.04	0.846	15.05	132.05	4	109.85	18.95	1.05	4481	hit	Slc16a3	NM_001038653;NM_001038654	NP_109621	Mus musculus solute carrier family 16 (monocarboxylic acid transporters), member 3 (Slc16a3), mRNA.			983
chr2	77519880	77520180	hit	0.03	0.646	0	131.8	5	72.45	13.95	8.8	374	hit	Zfp385b	NM_001113400	NP_001106871	Mus musculus zinc finger protein 385B (Zfp385b), transcript variant 3, mRNA.			-214
chr14	105677020	105677320	hit	0.018	0.632	7	131.5	7.85	75.4	10.2	13.4	419	hit	AK045385			Mus musculus adult male corpora quadrigemina cDNA, RIKEN full-length enriched library, clone:B230112B02 product:unclassifiable, full insert sequence.			-33295
chr13	112469720	112470020	hit	0.01	0.546	7.6	131.3	4.1	92.25	7.95	6	258	hit	Il6st	;NM_010560	;NP_034690	Mus musculus interleukin 6 signal transducer (Il6st), mRNA.			5650
chr18	80256800	80257100	hit	0.088	0.932	21.3	131.25	10	133.1	20.15	16	8387	hit	Pqlc1	NM_025861	NP_080137	Mus musculus PQ loop repeat containing 1 (Pqlc1), transcript variant 1, mRNA.			493
chr3	7944480	7944780	hit	0.008	0.608	22	130.85	6	72.65	20.25	22	184	hit	1700010I02Rik	NR_040587		Mus musculus RIKEN cDNA 1700010I02 gene (1700010I02Rik), long non-coding RNA.			10106
chr6	83288020	83288320	hit	0.036	0.848	3	130.85	6.15	153.1	14.35	11	2814	hit	Slc4a5	NM_001166067	NP_001159539	Mus musculus solute carrier family 4, sodium bicarbonate cotransporter, member 5 (Slc4a5), mRNA.			10608
chr16	77042560	77042860	hit	0.022	0.686	6.8	130.75	4.35	84.8	9.65	11	276	hit	Usp25	NM_013918	NP_038946	Mus musculus ubiquitin specific peptidase 25 (Usp25), mRNA.			28491
chr10	115571790	115572090	hit	0.004	0.542	1.8	130.55	3	101.75	7.25	7.25	358	hit	A930009A15Rik	NM_029982	NP_084258	Mus musculus RIKEN cDNA A930009A15 gene (A930009A15Rik), mRNA.			1804
chr13	111510540	111510840	hit	0.03	0.778	11.3	130.5	8.65	101.65	12.65	9.8	1965	hit	Gpbp1	NM_001122963;NM_028487	NP_001116435;NP_082763	Mus musculus GC-rich promoter binding protein 1 (Gpbp1), transcript variant 1, mRNA.;Mus musculus GC-rich promoter binding protein 1 (Gpbp1), transcript variant 2, mRNA.			-20499
chr9	78552410	78552710	hit	0.028	0.702	10.5	130.25	2	92.45	18.35	17.75	578	hit	Slc17a5	;NM_001276452;NM_172773	;NP_001263381;NP_766361	Mus musculus solute carrier family 17 (anion/sugar transporter), member 5 (Slc17a5), transcript variant 1, mRNA.;Mus musculus solute carrier family 17 (anion/sugar transporter), member 5 (Slc17a5), transcript variant 2, mRNA.			35334
chr7	19641270	19641570	hit	0.016	0.726	13	129.95	5.85	74.45	22.05	7.1	434	hit	Relb	NM_001290457;NM_009046	;NP_001277386;NP_033072	Mus musculus avian reticuloendotheliosis viral (v-rel) oncogene related B (Relb), transcript variant 1, mRNA.			-11832
chr14	118089710	118090010	hit	0.074	0.792	10.65	129.85	13.5	112.35	18	33.85	11651	hit	TRNA_Phe			transfer RNA Phe (anticodon GAA)		chr14.tRNA462-PheGAA	-113
chr14	66282450	66282750	hit	0.016	0.71	15.15	129.85	5.35	88.25	9.85	12.85	4766	hit	Ptk2b	NM_001162365;NM_172498	NP_001155837;NP_766086	Mus musculus PTK2 protein tyrosine kinase 2 beta (Ptk2b), transcript variant 2, mRNA.;Mus musculus PTK2 protein tyrosine kinase 2 beta (Ptk2b), transcript variant 3, mRNA.			-1398
chr18	67087310	67087610	hit	0.028	0.784	10.85	129.65	4.05	75.95	16.75	10.35	624	hit	Gnal	NM_177137	NP_796111	Mus musculus guanine nucleotide binding protein, alpha stimulating, olfactory type (Gnal), transcript variant 2, mRNA.			-687
chr9	36725820	36726120	hit	0.046	0.8	13.1	129.6	6.2	83.8	20.45	29.6	4748	hit	Chek1	NM_007691	NP_031717	Mus musculus checkpoint kinase 1 (Chek1), mRNA.			253
chr9	40820740	40821040	hit	0.01	0.658	15.8	129.55	9	91.05	15.5	12.25	504	hit	Hspa8	;NM_031165	;NP_112442	Mus musculus heat shock protein 8 (Hspa8), mRNA.			19467
chr5	74941670	74941970	hit	0.032	0.718	20.05	129.45	6	113.3	10.05	11.65	11766	hit	Gm6116	NR_045866		Mus musculus predicted gene 6116 (Gm6116), long non-coding RNA.			-7223
chr15	100573080	100573380	hit	0.034	0.778	1	129.25	1.6	96.55	14.75	14	411	hit	Pou6f1	NM_010127	NP_034257	Mus musculus POU domain, class 6, transcription factor 1 (Pou6f1), transcript variant 2, mRNA.			6850
chr7	49522820	49523120	hit	0.042	0.838	15.7	129.1	6	120.15	18.3	12.45	9999	hit	AK088944			Mus musculus 2 days neonate thymus thymic cells cDNA, RIKEN full-length enriched library, clone:E430032N19 product:unclassifiable, full insert sequence.			-30771
chr18	67087360	67087660	hit	0.032	0.78	8.45	128.95	5.3	74	13.2	11.25	580	hit	Gnal	NM_177137	NP_796111	Mus musculus guanine nucleotide binding protein, alpha stimulating, olfactory type (Gnal), transcript variant 2, mRNA.			-637
chr12	105583340	105583640	hit	0.016	0.824	23	128.85	3.95	103.4	24.25	17.15	7585	hit	Bdkrb2	NM_009747	NP_033877	Mus musculus bradykinin receptor, beta 2 (Bdkrb2), mRNA.			20168
chr17	47925140	47925440	hit	0.08	0.942	13	128.75	6	125.55	13.65	15	13638	hit	Foxp4	;NM_001110824;NM_001110825;NM_028767	;NP_001104294;NP_001104295;NP_083043	Mus musculus forkhead box P4 (Foxp4), transcript variant 1, mRNA.;Mus musculus forkhead box P4 (Foxp4), transcript variant 2, mRNA.;Mus musculus forkhead box P4 (Foxp4), transcript variant 3, mRNA.			-508
chr1	65185600	65185900	hit	0.024	0.65	26.2	128.45	13.35	107.9	16	32.55	2464	hit	Idh1	NM_001111320	NP_034627	Mus musculus isocitrate dehydrogenase 1 (NADP+), soluble (Idh1), transcript variant 1, mRNA.			578
chr11	119043820	119044120	hit	0.02	0.794	12.6	128.45	2	92.25	29.25	28.1	5666	hit	Cbx8	NM_013926	NP_038954	Mus musculus chromobox 8 (Cbx8), mRNA.			-2907
chrX	49797660	49797960	hit	0.054	0.886	9.7	128.4	6	127.6	19.35	22.8	14474	hit	Igsf1	NM_177591;NM_177915	NP_808583;NP_899179	Mus musculus immunoglobulin superfamily, member 1 (Igsf1), transcript variant 1, mRNA.;Mus musculus immunoglobulin superfamily, member 1 (Igsf1), transcript variant 2, mRNA.			0
chr8	78508680	78508980	hit	0.186	1.088	19.95	128.35	6.15	155.05	27.9	19.15	24906	hit	Rbmxl1	NM_001252089;NM_009033	NP_033059	Mus musculus RNA binding motif protein, X linked-like-1 (Rbmxl1), transcript variant 1, mRNA.;Mus musculus RNA binding motif protein, X linked-like-1 (Rbmxl1), transcript variant 2, mRNA.			0
chr14	105677100	105677400	hit	0.012	0.628	6.9	128.25	7	68.5	7.65	14.25	360	hit	AK045385			Mus musculus adult male corpora quadrigemina cDNA, RIKEN full-length enriched library, clone:B230112B02 product:unclassifiable, full insert sequence.			-33375
chr16	32718100	32718400	hit	0.026	0.582	13	128.25	2	80.9	11.9	10.5	146	hit	Muc4	NM_080457	NP_536705	Mus musculus mucin 4 (Muc4), mRNA.			-17485
chr16	77041100	77041400	hit	0.014	0.608	10	128.15	6	99.65	19	6	402	hit	Usp25	NM_013918	NP_038946	Mus musculus ubiquitin specific peptidase 25 (Usp25), mRNA.			27031
chr7	18962790	18963090	hit	0.054	0.868	12.15	128.15	7.1	134.5	12.7	14.5	4529	hit	Nanos2	NM_194064	NP_918953	Mus musculus nanos homolog 2 (Drosophila) (Nanos2), mRNA.			-24433
chr13	111510460	111510760	hit	0.03	0.742	12.9	128	7.9	99.1	15.35	20.7	1507	hit	Gpbp1	NM_001122963;NM_028487	NP_001116435;NP_082763	Mus musculus GC-rich promoter binding protein 1 (Gpbp1), transcript variant 1, mRNA.;Mus musculus GC-rich promoter binding protein 1 (Gpbp1), transcript variant 2, mRNA.			-20419
chr10	18532970	18533270	hit	0.022	0.616	14.4	127.85	5.7	73.5	5.75	16.55	327	hit	Hebp2	;NM_019487	;NP_062360	Mus musculus heme binding protein 2 (Hebp2), mRNA.			12805
chr12	85366120	85366420	hit	0.01	0.704	12.15	127.55	6.3	90.3	11.6	14.1	388	hit	Tmed10	NM_026775	NP_081051	Mus musculus transmembrane emp24-like trafficking protein 10 (yeast) (Tmed10), mRNA.			8296
chr4	101263950	101264250	hit	0.016	0.638	10	127.35	3.35	93.55	19	8.05	1086	hit	Jak1	NM_146145	NP_666257	Mus musculus Janus kinase 1 (Jak1), mRNA.			1031
chr17	74943200	74943500	hit	0.02	0.716	11.9	127.3	3.05	84.15	14.55	4.05	438	hit	Ltbp1	NM_019919	NP_064303	Mus musculus latent transforming growth factor beta binding protein 1 (Ltbp1), transcript variant 1, mRNA.			-62028
chrX	49796960	49797260	hit	0.022	0.75	5.8	127.3	5	100.65	14.55	20.9	2113	hit	Igsf1	NM_177591;NM_177915	NP_808583;NP_899179	Mus musculus immunoglobulin superfamily, member 1 (Igsf1), transcript variant 1, mRNA.;Mus musculus immunoglobulin superfamily, member 1 (Igsf1), transcript variant 2, mRNA.			484
chr3	7944580	7944880	hit	0.006	0.6	21.95	127.3	10	76.15	15.25	18.65	159	hit	1700010I02Rik	NR_040587		Mus musculus RIKEN cDNA 1700010I02 gene (1700010I02Rik), long non-coding RNA.			10006
chr5	122693100	122693400	hit	0.026	0.674	12	127.1	6	70.75	14.15	26.3	564	hit	Mir8115	NR_106195		Mus musculus microRNA mir-8115 (Mir8115), microRNA.			10503
chr17	33841440	33841740	hit	0.02	0.714	15.65	127.1	5	113.2	11	6.4	628	hit	Cd320	NM_019421	NP_062294	Mus musculus CD320 antigen (Cd320), transcript variant 1, mRNA.			-1350
chr13	64121870	64122170	hit	0.004	0.578	12.3	127	4.4	104.9	4.9	12.5	245	hit	Slc35d2	;NM_001001321	;NP_001001321	Mus musculus solute carrier family 35, member D2 (Slc35d2), mRNA.			7159
chr19	5393980	5394280	hit	0.038	0.82	10.35	126.95	1.95	91.5	1.1	8.6	1172	hit	Tsga10ip			SubName: Full=Protein Tsga10ip ;			120
chr2	158557380	158557680	hit	0.012	0.738	10.95	126.95	2	119.1	10.8	10	1078	hit	Arhgap40	NM_001145015	NP_001138487	Mus musculus Rho GTPase activating protein 40 (Arhgap40), mRNA.			44584
chr11	109667380	109667680	hit	0.056	0.784	7	126.9	8	106.25	13.25	17.85	387	hit	Prkar1a	NM_021880	NP_068680	Mus musculus protein kinase, cAMP dependent regulatory, type I, alpha (Prkar1a), mRNA.			16431
chr18	46503480	46503780	hit	0.02	0.586	6.95	126.9	7.2	72.95	8.1	16.95	258	hit	Fem1c	NM_173423	NP_775599	Mus musculus fem-1 homolog c (C.elegans) (Fem1c), mRNA.			22190
chr11	40709650	40709950	hit	0.016	0.744	10.8	126.45	2	123	17	16.8	254	hit	Hmmr	NM_013552	NP_038580	Mus musculus hyaluronan mediated motility receptor (RHAMM) (Hmmr), mRNA.			12006
chr17	47925350	47925650	hit	0.06	0.882	16.45	126.45	5	120.85	10.65	22.7	7262	hit	Foxp4	;NM_001110824;NM_001110825;NM_028767	;NP_001104294;NP_001104295;NP_083043	Mus musculus forkhead box P4 (Foxp4), transcript variant 1, mRNA.;Mus musculus forkhead box P4 (Foxp4), transcript variant 2, mRNA.;Mus musculus forkhead box P4 (Foxp4), transcript variant 3, mRNA.			-718
chr2	77519950	77520250	hit	0.03	0.646	0	126.45	5	74.5	13.8	9.55	461	hit	Zfp385b	NM_001113400	NP_001106871	Mus musculus zinc finger protein 385B (Zfp385b), transcript variant 3, mRNA.			-284
chr15	77819770	77820070	hit	0.022	0.794	16	126.4	5.4	81.05	19.8	12.9	1444	hit	Myh9	;NM_022410	;NP_071855	Mus musculus myosin, heavy polypeptide 9, non-muscle (Myh9), mRNA.			22104
chr12	103155870	103156170	hit	0.016	0.706	4.75	126.25	5.85	67.35	11.35	6.7	349	hit	Prima1			Mus musculus proline rich membrane anchor 1 (Prima1), mRNA.			85955
chr12	105623000	105623300	hit	0.028	0.724	22.4	126.1	2.1	76.75	11.55	7.7	998	hit	Atg2b			Mus musculus autophagy related 2B (Atg2b), mRNA.			0
chr11	111887140	111887440	hit	0.016	0.646	5.7	126	3.95	82.2	7.2	7	201	hit	AB350709			Mus musculus non-coding RNA, oocyte_piRNA1525, complete sequence.			544023
chr16	48581070	48581370	hit	0.028	0.686	8.6	125.8	4	66.45	31.1	18.1	17	hit	Morc1			Mus musculus microrchidia 1 (Morc1), mRNA.			-30333
chr1	186609600	186609900	hit	0.022	0.764	14.4	125.75	8.15	82.45	22.95	29.1	1648	hit	A730004F24Rik	NR_131124;NR_131158		Mus musculus RIKEN cDNA A730004F24 gene (A730004F24Rik), transcript variant 1, long non-coding RNA.;Mus musculus RIKEN cDNA A730004F24 gene (A730004F24Rik), transcript variant 2, long non-coding RNA.			-50919
chr17	74943070	74943370	hit	0.022	0.696	12.4	125.65	3.2	86.25	9.45	4.7	428	hit	Ltbp1	NM_019919	NP_064303	Mus musculus latent transforming growth factor beta binding protein 1 (Ltbp1), transcript variant 1, mRNA.			-62158
chr1	165920940	165921240	hit	0.008	0.566	16.6	125.5	4	66.45	12.8	18.3	536	hit	Pou2f1	NM_198934	NP_945152	Mus musculus POU domain, class 2, transcription factor 1 (Pou2f1), transcript variant 1, mRNA.			-3918
chr10	71268430	71268730	hit	0.012	0.646	7.7	125.4	7.45	74.45	14	16.5	500	hit	Ube2d1	NM_145420	NP_663395	Mus musculus ubiquitin-conjugating enzyme E2D 1 (Ube2d1), mRNA.			16531
chr4	40743900	40744200	hit	0.032	0.776	8.8	125.15	4	93.45	26.85	16	432	hit	Smu1	NM_021535	NP_067510	Mus musculus smu-1 suppressor of mec-8 and unc-52 homolog (C. elegans) (Smu1), mRNA.			13684
chr17	74945230	74945530	hit	0.02	0.728	12.5	125.1	4.15	89.55	22.1	9.3	344	hit	Ltbp1	NM_019919	NP_064303	Mus musculus latent transforming growth factor beta binding protein 1 (Ltbp1), transcript variant 1, mRNA.			-59998
chr5	146435340	146435640	hit	0.038	0.656	10.25	125.05	2	80.3	12	2.05	229	hit	Gm6408	NM_001243104	NP_001230033	Mus musculus predicted gene 6408 (Gm6408), mRNA.			-46302
chr14	105677150	105677450	hit	0.014	0.634	7.9	124.9	6.5	69.95	10	15.5	288	hit	AK045385			Mus musculus adult male corpora quadrigemina cDNA, RIKEN full-length enriched library, clone:B230112B02 product:unclassifiable, full insert sequence.			-33425
chr7	49521460	49521760	hit	0.018	0.796	17.05	124.85	10.75	121.2	17.5	12.75	3497	hit	AK088944			Mus musculus 2 days neonate thymus thymic cells cDNA, RIKEN full-length enriched library, clone:E430032N19 product:unclassifiable, full insert sequence.			-32131
chr14	57913680	57913980	hit	0.016	0.69	19.4	124.85	9	92.3	25.7	10.3	463	hit	Zdhhc20	NM_029492	NP_083768	Mus musculus zinc finger, DHHC domain containing 20 (Zdhhc20), mRNA.			-23418
chr4	80910810	80911110	hit	0.088	0.844	17.3	124.7	7	112.15	7.45	12.65	4576	hit	Lurap1l	NM_026821	NP_081097	Mus musculus leucine rich adaptor protein 1-like (Lurap1l), mRNA.			124
chr18	80256880	80257180	hit	0.08	0.896	15.5	124.55	7.7	124.35	23.1	15	7733	hit	Pqlc1	NM_025861	NP_080137	Mus musculus PQ loop repeat containing 1 (Pqlc1), transcript variant 1, mRNA.			573
chr2	166194530	166194830	hit	0.026	0.8	21.5	124.5	8.9	93	16.1	22.95	2582	hit	Sulf2	NM_001252579;NM_028072	NP_001239508;NP_082348	Mus musculus sulfatase 2 (Sulf2), transcript variant 2, mRNA.;Mus musculus sulfatase 2 (Sulf2), transcript variant 3, mRNA.			-38847
chr9	32635620	32635920	hit	0.018	0.768	6	124.4	6	100.6	3	15.25	1998	hit	Ets1			Mus musculus E26 avian leukemia oncogene 1, 5' domain (Ets1), transcript variant 2, mRNA.			-300
chr3	86755710	86756010	hit	0.014	0.516	10.55	124.35	9.9	83.35	11	11.2	116	hit	Dclk2			Mus musculus doublecortin-like kinase 2 (Dclk2), transcript variant 3, mRNA.			37902
chr11	77929510	77929810	hit	0.01	0.766	3	124.3	3	100.4	20.25	16.15	594	hit	Gm11190	NR_033549		Mus musculus predicted gene 11190 (Gm11190), long non-coding RNA.			-222
chr8	36952700	36953000	hit	0.03	0.712	1.2	124.25	2	121.35	6.75	7.4	2071	hit	Dlc1	;NM_001194940	;NP_001181869	Mus musculus deleted in liver cancer 1 (Dlc1), transcript variant 1, mRNA.			-258
chr15	36505810	36506110	hit	0.03	0.77	8.8	123.6	9.9	97.35	18.5	18.8	2173	hit	Ankrd46	NM_175134	NP_780343	Mus musculus ankyrin repeat domain 46 (Ankrd46), mRNA.			-9019
chr18	67087440	67087740	hit	0.032	0.774	7.65	123.55	7.9	79.95	14.25	11.75	715	hit	Gnal	NM_177137	NP_796111	Mus musculus guanine nucleotide binding protein, alpha stimulating, olfactory type (Gnal), transcript variant 2, mRNA.			-557
chr12	111486280	111486580	hit	0.056	0.888	12.15	123.5	11	72.75	16	10.55	8576	hit	Gm266	NM_001033248	NP_001028420	Mus musculus predicted gene 266 (Gm266), mRNA.			-457
chr6	115456420	115456720	hit	0.004	0.644	18	123.45	6	81.25	25.75	19.95	232	hit	Pparg	NM_001127330	NP_001120802	Mus musculus peroxisome proliferator activated receptor gamma (Pparg), transcript variant 2, mRNA.			16580
chr12	69983310	69983610	hit	0.014	0.604	12.25	123.3	2.45	70.7	15	12	359	hit	Sav1	NM_022028	NP_071311	Mus musculus salvador homolog 1 (Drosophila) (Sav1), mRNA.			3391
chr4	116144060	116144360	hit	0.076	0.89	17.05	123.25	2	78.95	10.65	18.35	5941	hit	Lurap1	NM_026547	NP_080823	Mus musculus leucine rich adaptor protein 1 (Lurap1), mRNA.			255
chr2	60326340	60326640	hit	0.024	0.708	12.1	123.2	8	67.7	13	5	228	hit	AK050909			Mus musculus 9 days embryo whole body cDNA, RIKEN full-length enriched library, clone:D030033O05 product:unclassifiable, full insert sequence.			-11547
chr17	47925490	47925790	hit	0.038	0.824	18.45	123.15	4	110.2	9.6	16.3	5385	hit	Foxp4	;NM_001110824;NM_001110825;NM_028767	;NP_001104294;NP_001104295;NP_083043	Mus musculus forkhead box P4 (Foxp4), transcript variant 1, mRNA.;Mus musculus forkhead box P4 (Foxp4), transcript variant 2, mRNA.;Mus musculus forkhead box P4 (Foxp4), transcript variant 3, mRNA.			-858
chr4	116143980	116144280	hit	0.062	0.854	15.9	123.15	4	71.4	8	23.15	4826	hit	Lurap1	NM_026547	NP_080823	Mus musculus leucine rich adaptor protein 1 (Lurap1), mRNA.			335
chr12	109526100	109526400	hit	0.036	0.78	4.15	123.05	5.75	114.55	15.8	4.7	1515	hit	Meg3	;NR_027651;NR_027652		Mus musculus maternally expressed 3 (Meg3), transcript variant 2, long non-coding RNA.;Mus musculus maternally expressed 3 (Meg3), transcript variant 3, long non-coding RNA.			-14595
chr19	5394100	5394400	hit	0.036	0.834	3.2	123	3	80.85	4	9.15	1486	hit	Tsga10ip			SubName: Full=Protein Tsga10ip ;			0
chr12	29534150	29534450	hit	0.016	0.666	12.15	122.8	2	87.1	13.45	10	2279	hit	Myt1l	NM_001093776	NP_032692	Mus musculus myelin transcription factor 1-like (Myt1l), transcript variant 3, mRNA.			-454
chr10	127584510	127584810	hit	0.058	0.9	10	122.75	5.05	60.65	9.25	8	642	hit	Lrp1	;NM_008512	;NP_032538	Mus musculus low density lipoprotein receptor-related protein 1 (Lrp1), mRNA.			36337
chr8	61361890	61362190	hit	0.03	0.724	11.65	122.1	2	85.85	13.05	5	521	hit	AK205379			Mus musculus cDNA, clone:Y2G0101H23, strand:minus, reference:ENSEMBL:Mouse-Transcript-ENST:ENSMUST00000065099, based on BLAT search.			18546
chr1	75251670	75251970	hit	0.05	0.852	32.6	122.05	13	81.4	46.2	33.6	12155	hit	AB349811			Mus musculus non-coding RNA, oocyte_piRNA627, complete sequence.			-8331
chr11	59447080	59447380	hit	0.012	0.73	8.95	122	3.6	46.75	10.05	21	429	hit	Snap47	NM_144521	NP_653104	Mus musculus synaptosomal-associated protein, 47 (Snap47), mRNA.			2575
chr7	73304710	73305010	hit	0.024	0.744	26.15	121.85	6	103.4	34.45	17	7454	hit	LOC100505025	NR_105062		Mus musculus uncharacterized LOC100505025 (LOC100505025), long non-coding RNA.			-5369
chr5	140321450	140321750	hit	0.124	0.978	14	121.75	13	139	34.1	26.7	35483	hit	Mad1l1	;NM_010752	;NP_034882	Mus musculus MAD1 mitotic arrest deficient 1-like 1 (Mad1l1), mRNA.			0
chr7	49522880	49523180	hit	0.04	0.83	17.8	121.55	5	118.3	17.4	17.05	7540	hit	AK088944			Mus musculus 2 days neonate thymus thymic cells cDNA, RIKEN full-length enriched library, clone:E430032N19 product:unclassifiable, full insert sequence.			-30711
chr17	74945140	74945440	hit	0.024	0.738	9.2	121.5	7	83.85	16.45	9	303	hit	Ltbp1	NM_019919	NP_064303	Mus musculus latent transforming growth factor beta binding protein 1 (Ltbp1), transcript variant 1, mRNA.			-60088
chr16	48580790	48581090	hit	0.032	0.722	10.1	121.3	3	75.35	22.3	13.5	0	hit	Morc1			Mus musculus microrchidia 1 (Morc1), mRNA.			-30613
chr11	62847800	62848100	hit	0.014	0.738	10.3	121.2	3.6	114.45	19.8	14.6	1230	hit	Fbxw10	;NM_001033669;NM_001291441	;NP_001028841;NP_001278370	Mus musculus F-box and WD-40 domain protein 10 (Fbxw10), transcript variant 1, mRNA.;Mus musculus F-box and WD-40 domain protein 10 (Fbxw10), transcript variant 2, mRNA.			677
chr2	60326200	60326500	hit	0.024	0.692	5.1	121.15	4	64.1	15	8	266	hit	AK050909			Mus musculus 9 days embryo whole body cDNA, RIKEN full-length enriched library, clone:D030033O05 product:unclassifiable, full insert sequence.			-11687
chr11	40695130	40695430	hit	0.048	0.724	26.05	121.15	5.45	82.1	7	12.5	2909	hit	Mat2b	NM_001199274	NP_001186203	Mus musculus methionine adenosyltransferase II, beta (Mat2b), transcript variant 2, mRNA.			0
chr7	3440760	3441060	hit	0.02	0.776	14.25	120.35	2.05	118.55	18.75	12.95	1070	hit	Cacng6	NM_133183	NP_573446	Mus musculus calcium channel, voltage-dependent, gamma subunit 6 (Cacng6), mRNA.			16098
chr5	147875060	147875360	hit	0.038	0.778	15.55	120.15	7.6	83.7	10	8	300	hit	Pomp	;NM_025624	;NP_079900	Mus musculus proteasome maturation protein (Pomp), mRNA.			14432
chr11	77929340	77929640	hit	0.012	0.774	3.2	120.1	2.45	91.25	12.3	18.4	1021	hit	Gm11190	NR_033549		Mus musculus predicted gene 11190 (Gm11190), long non-coding RNA.			-52
chr1	39556630	39556930	hit	0.026	0.672	12.7	120.05	5.9	88.5	32.4	22.2	542	hit	AK040602			Mus musculus 0 day neonate thymus cDNA, RIKEN full-length enriched library, clone:A430108H20 product:RIKEN cDNA 1600023E10 gene, full insert sequence.			-4628
chr1	79762440	79762740	hit	0.022	0.73	2	120	3	114.45	5.15	20.25	1319	hit	Wdfy1	NM_001111279;NM_027057	NP_001104749;NP_081333	Mus musculus WD repeat and FYVE domain containing 1 (Wdfy1), transcript variant 1, mRNA.;Mus musculus WD repeat and FYVE domain containing 1 (Wdfy1), transcript variant 2, mRNA.			-671
chr14	105675220	105675520	hit	0.008	0.668	8	119.9	7.5	56	5.95	5.5	256	hit	AK045385			Mus musculus adult male corpora quadrigemina cDNA, RIKEN full-length enriched library, clone:B230112B02 product:unclassifiable, full insert sequence.			-31495
chr10	59878010	59878310	hit	0.028	0.706	13	119.85	5	82.15	14.6	16.85	799	hit	Dnajb12	;NM_019965	;NP_064349	Mus musculus DnaJ (Hsp40) homolog, subfamily B, member 12 (Dnajb12), mRNA.			-1280
chr10	115571590	115571890	hit	0.016	0.588	2	119.8	3	99	7.85	6.05	922	hit	A930009A15Rik	NM_029982	NP_084258	Mus musculus RIKEN cDNA A930009A15 gene (A930009A15Rik), mRNA.			1604
chr3	52270220	52270520	hit	0.042	0.834	18.55	119.8	7	81.3	13	14.95	5797	hit	Foxo1	NM_019739	NP_062713	Mus musculus forkhead box O1 (Foxo1), mRNA.			1883
chr7	49523010	49523310	hit	0.034	0.792	21.25	119.75	4.55	101.5	15.5	19	4522	hit	AK088944			Mus musculus 2 days neonate thymus thymic cells cDNA, RIKEN full-length enriched library, clone:E430032N19 product:unclassifiable, full insert sequence.			-30581
chr11	107625880	107626180	hit	0.03	0.67	6	119.65	6.65	45.55	21.4	14.7	337	hit	Helz	NM_198298	NP_938040	Mus musculus helicase with zinc finger domain (Helz), mRNA.			-1140
chr2	168763170	168763470	hit	0.018	0.638	5.8	119.55	5	70.85	18.05	8.1	2458	hit	AK052878			Mus musculus 16 days neonate heart cDNA, RIKEN full-length enriched library, clone:D830018J03 product:unclassifiable, full insert sequence.			-2672
chr14	54650670	54650970	hit	0.048	0.808	16.6	119.55	7.3	69.25	29.4	20.25	3791	hit	4930579G18Rik	NR_038053		Mus musculus RIKEN cDNA 4930579G18 gene (4930579G18Rik), long non-coding RNA.			159
chr8	78509370	78509670	hit	0.118	0.972	21.55	119.5	11.55	114.4	24.2	29.05	22043	hit	Slc10a7	NM_001009981;NM_001282108;NM_001282109;NM_029736;NR_104094	;NP_001009981;NP_001269037;NP_001269038;NP_084012	Mus musculus solute carrier family 10 (sodium/bile acid cotransporter family), member 7 (Slc10a7), transcript variant a, mRNA.;Mus musculus solute carrier family 10 (sodium/bile acid cotransporter family), member 7 (Slc10a7), transcript variant b, non-coding RNA.;Mus musculus solute carrier family 10 (sodium/bile acid cotransporter family), member 7 (Slc10a7), transcript variant c, mRNA.;Mus musc…			42
chr9	56825600	56825900	hit	0.046	0.886	9.25	119.45	5	81.1	15	22.45	8349	hit	Odf3l1	NM_198673	NP_941075	Mus musculus outer dense fiber of sperm tails 3-like 1 (Odf3l1), mRNA.			26062
chr7	19641880	19642180	hit	0.026	0.722	22.7	119.45	3	73.95	19.8	18.55	370	hit	Relb	NM_001290457;NM_009046	;NP_001277386;NP_033072	Mus musculus avian reticuloendotheliosis viral (v-rel) oncogene related B (Relb), transcript variant 1, mRNA.			-12442
chr17	47925420	47925720	hit	0.048	0.848	15.8	119.3	3.75	105.95	10	17.1	5954	hit	Foxp4	;NM_001110824;NM_001110825;NM_028767	;NP_001104294;NP_001104295;NP_083043	Mus musculus forkhead box P4 (Foxp4), transcript variant 1, mRNA.;Mus musculus forkhead box P4 (Foxp4), transcript variant 2, mRNA.;Mus musculus forkhead box P4 (Foxp4), transcript variant 3, mRNA.			-788
chr6	83287810	83288110	hit	0.026	0.822	1	119.25	8.5	162.5	13.65	12.8	2147	hit	Slc4a5	NM_001166067	NP_001159539	Mus musculus solute carrier family 4, sodium bicarbonate cotransporter, member 5 (Slc4a5), mRNA.			10398
chr15	8655450	8655750	hit	0.026	0.644	1	119.2	3	67.25	15.85	16.2	329	hit	Slc1a3	NM_148938	NP_683740	Mus musculus solute carrier family 1 (glial high affinity glutamate transporter), member 3 (Slc1a3), mRNA.			-3944
chr14	66282040	66282340	hit	0.014	0.724	9.1	119.05	6.95	66.6	18.5	19.95	568	hit	Ptk2b	NM_001162365;NM_172498	NP_001155837;NP_766086	Mus musculus PTK2 protein tyrosine kinase 2 beta (Ptk2b), transcript variant 2, mRNA.;Mus musculus PTK2 protein tyrosine kinase 2 beta (Ptk2b), transcript variant 3, mRNA.			-988
chr11	107625510	107625810	hit	0.036	0.728	17.7	118.8	4.55	51.05	13.75	20.5	349	hit	Helz	NM_198298	NP_938040	Mus musculus helicase with zinc finger domain (Helz), mRNA.			-1510
chr6	134122890	134123190	hit	0.014	0.602	10.3	118.7	3	71.25	10.5	15.95	409	hit	Etv6	NM_001303102;NM_007961	NP_001290031	Mus musculus ets variant 6 (Etv6), transcript variant 1, mRNA.;Mus musculus ets variant 6 (Etv6), transcript variant 2, mRNA.			87190
chr16	77041030	77041330	hit	0.012	0.61	11	118.65	6.85	81.4	16.85	6.65	428	hit	Usp25	NM_013918	NP_038946	Mus musculus ubiquitin specific peptidase 25 (Usp25), mRNA.			26961
chr2	119777420	119777720	hit	0.012	0.684	8.6	118.55	2	100.15	12.05	11.35	349	hit	Rpap1			Mus musculus RNA polymerase II associated protein 1 (Rpap1), transcript variant 2, mRNA.			9791
chr14	105677260	105677560	hit	0.02	0.65	6.8	118.55	3.8	56.7	12.35	15.1	293	hit	AK045385			Mus musculus adult male corpora quadrigemina cDNA, RIKEN full-length enriched library, clone:B230112B02 product:unclassifiable, full insert sequence.			-33535
chr2	168763950	168764250	hit	0.03	0.756	13.7	118.35	5.5	84.55	13.5	13.8	2711	hit	AK052878			Mus musculus 16 days neonate heart cDNA, RIKEN full-length enriched library, clone:D830018J03 product:unclassifiable, full insert sequence.			-1892
chr8	83593890	83594190	hit	0.064	0.832	11.2	118.3	3	77.7	18.85	23.85	11999	hit	Tecr	NM_027179;NM_134118	NP_081455;NP_598879	Mus musculus trans-2,3-enoyl-CoA reductase (Tecr), transcript variant 1, mRNA.;Mus musculus trans-2,3-enoyl-CoA reductase (Tecr), transcript variant 2, mRNA.			300
chr6	34708600	34708900	hit	0.022	0.77	10.65	118.25	8	167.25	14.25	19.5	2773	hit	Cald1	NM_145575	NP_663550	Mus musculus caldesmon 1 (Cald1), mRNA.			-543
chr19	9135270	9135570	hit	0.09	0.93	13.4	118.15	8	126	17.85	7.2	16725	hit	Asrgl1	NM_025610	NP_079886	Mus musculus asparaginase like 1 (Asrgl1), mRNA.			0
chr16	48581020	48581320	hit	0.03	0.692	7.75	118.05	3.6	66.6	29	16.2	16	hit	Morc1			Mus musculus microrchidia 1 (Morc1), mRNA.			-30383
chr15	6241850	6242150	hit	0.016	0.646	4	117.95	3	60.35	12.85	18.75	633	hit	AB335791			Mus musculus non-coding RNA, oocyte_clustered_small_RNA992, complete sequence.			14108
chr16	77042600	77042900	hit	0.02	0.652	7.15	117.8	6	79.6	8.85	10.9	263	hit	Usp25	NM_013918	NP_038946	Mus musculus ubiquitin specific peptidase 25 (Usp25), mRNA.			28531
chr9	73068400	73068700	hit	0.022	0.746	10.25	117.8	4.9	57.35	18.85	13	2338	hit	Rab27a	NM_001301232	NP_001288161	Mus musculus RAB27A, member RAS oncogene family (Rab27a), transcript variant 3, mRNA.			4252
chr18	30339760	30340060	hit	0.02	0.694	16	117.65	6	72.1	14.55	18.05	424	hit	Pik3c3	;NM_181414	;NP_852079	Mus musculus phosphoinositide-3-kinase, class 3 (Pik3c3), mRNA.			66864
chr10	12608980	12609280	hit	0.018	0.68	12.55	117.55	4	98.95	18.95	11.05	335	hit	Utrn			Mus musculus utrophin (Utrn), mRNA.			5610
chr10	71267460	71267760	hit	0.038	0.726	12.7	117.55	3	100.5	10.05	8.35	623	hit	Ube2d1	NM_145420	NP_663395	Mus musculus ubiquitin-conjugating enzyme E2D 1 (Ube2d1), mRNA.			17501
chr18	30340350	30340650	hit	0.018	0.596	9.5	117.5	4	67.65	18	10	245	hit	Pik3c3	;NM_181414	;NP_852079	Mus musculus phosphoinositide-3-kinase, class 3 (Pik3c3), mRNA.			67454
chr6	118459430	118459730	hit	0.008	0.616	6.95	117.5	6.65	77.7	14.9	13.9	218	hit	Zfp248	NM_028335	NP_082611	Mus musculus zinc finger protein 248 (Zfp248), mRNA.			-3924
chr10	41001940	41002240	hit	0.006	0.678	3	117.35	6.5	97.75	2	9.45	345	hit	AK080786			Mus musculus 9.5 days embryo parthenogenote cDNA, RIKEN full-length enriched library, clone:B130055L14 product:WASP family 1, full insert sequence.			63765
chr17	33841390	33841690	hit	0.014	0.702	12.6	117.3	6.9	109.85	13.05	7.6	646	hit	Cd320	NM_019421	NP_062294	Mus musculus CD320 antigen (Cd320), transcript variant 1, mRNA.			-1400
chr15	102981150	102981450	hit	0.068	0.818	10.3	117.3	2	120.2	10	14.6	6874	hit	Hoxc9	NM_008272	NP_032298	Mus musculus homeobox C9 (Hoxc9), mRNA.			4118
chr14	66635530	66635830	hit	0.058	0.836	13.65	117.3	6	103.3	15.95	12.65	5138	hit	Adra1a	NM_001271759;NM_001271760;NM_001271761;NM_013461	NP_001258688;NP_001258690;NP_038489	Mus musculus adrenergic receptor, alpha 1a (Adra1a), transcript variant 1, mRNA.;Mus musculus adrenergic receptor, alpha 1a (Adra1a), transcript variant 2, mRNA.;Mus musculus adrenergic receptor, alpha 1a (Adra1a), transcript variant 3, mRNA.;Mus musculus adrenergic receptor, alpha 1a (Adra1a), transcript variant 4, mRNA.			279
chr17	74943010	74943310	hit	0.022	0.696	11.4	117.25	3.85	84.35	7	7.6	390	hit	Ltbp1	NM_019919	NP_064303	Mus musculus latent transforming growth factor beta binding protein 1 (Ltbp1), transcript variant 1, mRNA.			-62218
chr6	48627340	48627640	hit	0.066	0.91	4	117.15	5.4	162.9	20.45	13.35	5272	hit	AI854703	NR_027236		Mus musculus expressed sequence AI854703 (AI854703), non-coding RNA.			-526
chr7	18962920	18963220	hit	0.064	0.892	7.15	116.95	7.7	109.9	18.2	14.4	4084	hit	Nanos2	NM_194064	NP_918953	Mus musculus nanos homolog 2 (Drosophila) (Nanos2), mRNA.			-24303
chr16	48580630	48580930	hit	0.028	0.718	9.95	116.9	5.75	75.75	17.85	15.55	0	hit	Morc1			Mus musculus microrchidia 1 (Morc1), mRNA.			-30773
chr5	29479300	29479600	hit	0.058	0.764	13.85	116.9	4.2	92	32.6	23.65	6994	hit	Mnx1	NM_019944	NP_064328	Mus musculus motor neuron and pancreas homeobox 1 (Mnx1), mRNA.			-830
chr11	77929700	77930000	hit	0.01	0.708	4	116.85	2.85	82.75	15.65	9.1	315	hit	Gm11190	NR_033549		Mus musculus predicted gene 11190 (Gm11190), long non-coding RNA.			-412
chr2	168763220	168763520	hit	0.02	0.634	6.8	116.8	5	73.6	16.85	9	2284	hit	AK052878			Mus musculus 16 days neonate heart cDNA, RIKEN full-length enriched library, clone:D830018J03 product:unclassifiable, full insert sequence.			-2622
chr4	116995650	116995950	hit	0.128	1.026	14.55	116.7	7	117.65	21.8	23.95	11101	hit	Hectd3	NM_175244	NP_780453	Mus musculus HECT domain containing 3 (Hectd3), mRNA.			302
chr7	73304800	73305100	hit	0.03	0.72	22.35	116.55	8	105.7	31.8	19.85	8046	hit	LOC100505025	NR_105062		Mus musculus uncharacterized LOC100505025 (LOC100505025), long non-coding RNA.			-5279
chr9	40819620	40819920	hit	0.018	0.748	5.2	116.45	7	67.75	14.5	15	749	hit	Hspa8	;NM_031165	;NP_112442	Mus musculus heat shock protein 8 (Hspa8), mRNA.			18347
chr6	115456330	115456630	hit	0.004	0.69	19.25	116.3	4	82.05	27.05	20.15	300	hit	Pparg	NM_001127330	NP_001120802	Mus musculus peroxisome proliferator activated receptor gamma (Pparg), transcript variant 2, mRNA.			16490
chr5	118372710	118373010	hit	0.02	0.692	5	116.3	3	85	13	16	497	hit	2410131K14Rik	NM_001081236	NP_001074705	Mus musculus RIKEN cDNA 2410131K14 gene (2410131K14Rik), mRNA.			127483
chr8	36952810	36953110	hit	0.024	0.67	3	116.25	3	113.85	10.7	9.85	2500	hit	Dlc1	;NM_001194940	;NP_001181869	Mus musculus deleted in liver cancer 1 (Dlc1), transcript variant 1, mRNA.			-368
chr8	68882110	68882410	hit	0.024	0.68	8.6	116.15	7.05	90.3	10.55	11.45	961	hit	AK170106			Mus musculus NOD-derived CD11c +ve dendritic cells cDNA, RIKEN full-length enriched library, clone:F630017G06 product:lipoprotein lipase, full insert sequence.			1552
chr6	48627240	48627540	hit	0.084	0.948	4	116.15	6	162.9	25.5	10.95	6700	hit	AI854703			Mus musculus expressed sequence AI854703 (AI854703), non-coding RNA.			476
chr14	54650740	54651040	hit	0.046	0.814	10.25	116	8	75.8	23.6	18.05	3713	hit	4930579G18Rik	NR_038053		Mus musculus RIKEN cDNA 4930579G18 gene (4930579G18Rik), long non-coding RNA.			229
chrX	77433810	77434110	hit	0.046	0.78	3.85	115.95	4	87.3	25.25	22.5	8221	hit	JA187517			Sequence 38 from Patent WO2011020005.			-68668
chr7	49521400	49521700	hit	0.016	0.798	12.65	115.95	12	122.45	17.7	16.55	3056	hit	AK088944			Mus musculus 2 days neonate thymus thymic cells cDNA, RIKEN full-length enriched library, clone:E430032N19 product:unclassifiable, full insert sequence.			-32191
chr14	105677220	105677520	hit	0.018	0.652	5.6	115.85	3	58	11.5	14.9	282	hit	AK045385			Mus musculus adult male corpora quadrigemina cDNA, RIKEN full-length enriched library, clone:B230112B02 product:unclassifiable, full insert sequence.			-33495
chr17	7532340	7532640	hit	0.012	0.636	10.85	115.75	9	50.8	11.4	6.25	163	hit	Gm9992	NM_001142539	NP_001136011	Mus musculus predicted gene 9992 (Gm9992), mRNA.			-147035
chr17	6005200	6005500	hit	0.048	0.902	25.6	115.7	7	112.5	22.05	15.15	11037	hit	Synj2	;NM_001290698	;NP_001277627	Mus musculus synaptojanin 2 (Synj2), transcript variant 5, mRNA.			-2079
chr3	7944390	7944690	hit	0.016	0.624	18.5	115.6	4.15	58.3	19.1	17.15	198	hit	1700010I02Rik	NR_040587		Mus musculus RIKEN cDNA 1700010I02 gene (1700010I02Rik), long non-coding RNA.			10196
chr7	18962970	18963270	hit	0.064	0.904	10.35	115.4	8.65	101.75	23.85	18.55	4431	hit	Nanos2	NM_194064	NP_918953	Mus musculus nanos homolog 2 (Drosophila) (Nanos2), mRNA.			-24253
chr16	90443820	90444120	hit	0.034	0.718	7.05	115.35	3.7	58.45	11.15	4	1646	hit	AK033811			Mus musculus adult male epididymis cDNA, RIKEN full-length enriched library, clone:9230112I12 product:unclassifiable, full insert sequence.			3165
chr4	80909800	80910100	hit	0.012	0.562	14.55	114.95	3.15	77.5	7.7	18.9	252	hit	Lurap1l	NM_026821	NP_081097	Mus musculus leucine rich adaptor protein 1-like (Lurap1l), mRNA.			-585
chr4	124104840	124105140	hit	0.014	0.668	7.2	114.9	4.85	83.55	12.75	8.25	111	hit	Rragc	;NM_017475	;NP_059503	Mus musculus Ras-related GTP binding C (Rragc), mRNA.			187407
chr6	127252740	127253040	hit	0.016	0.758	18.6	114.85	5.65	63.05	7.35	14.45	1318	hit	D130058E03	NR_073373		Mus musculus uncharacterized D130058E03 (D130058E03), long non-coding RNA.			54926
chr16	90444010	90444310	hit	0.018	0.692	6	114.85	3.5	58.6	16.45	4	1152	hit	AK033811			Mus musculus adult male epididymis cDNA, RIKEN full-length enriched library, clone:9230112I12 product:unclassifiable, full insert sequence.			3355
chr8	114205880	114206180	hit	0.078	0.876	12.65	114.5	4	81.7	10.6	6.65	4311	hit	Vat1l	NM_173016	NP_766604	Mus musculus vesicle amine transport protein 1 homolog-like (T. californica) (Vat1l), mRNA.			240
chr5	148774730	148775030	hit	0.018	0.688	18.9	114.45	3.4	82.65	9.3	8.85	541	hit	4930505K14Rik	NR_131106		Mus musculus RIKEN cDNA 4930505K14 gene (4930505K14Rik), long non-coding RNA.			-2932
chr2	77519380	77519680	hit	0.048	0.702	1	114.4	5.6	85.95	9.8	11.05	4284	hit	Zfp385b	NM_001113400	NP_001106871	Mus musculus zinc finger protein 385B (Zfp385b), transcript variant 3, mRNA.			0
chr3	97228810	97229110	hit	0.026	0.64	12.1	114.05	5	68.05	6	19	823	hit	Bcl9	NM_029933	NP_084209	Mus musculus B cell CLL/lymphoma 9 (Bcl9), mRNA.			-1446
chr4	147260490	147260790	hit	0.002	0.508	24.8	113.65	7.1	60	32.5	30.15	67	hit	Gm13152	NM_001039209	NP_001034298	Mus musculus predicted gene 13152 (Gm13152), mRNA.			7195
chr15	95664920	95665220	hit	0.018	0.57	6.25	113.6	2	74.2	12.25	14	75	hit	Dbx2	NM_207533	NP_997416	Mus musculus developing brain homeobox 2 (Dbx2), mRNA.			-10149
chr4	109735520	109735820	hit	0.006	0.656	11.3	113.55	6.5	53.6	16.35	17.05	905	hit	Faf1			Mus musculus Fas-associated factor 1 (Faf1), mRNA.			-770
chr13	100415400	100415700	hit	0.072	0.806	4.8	113.5	5.85	104.3	11	14.1	368	hit	Naip1	;NM_008670	;NP_032696	Mus musculus NLR family, apoptosis inhibitory protein 1 (Naip1), mRNA.			30810
chr5	29479070	29479370	hit	0.058	0.812	6.55	113.45	2.55	100.2	18.75	16.1	7161	hit	Mnx1	NM_019944	NP_064328	Mus musculus motor neuron and pancreas homeobox 1 (Mnx1), mRNA.			-600
chr15	77819620	77819920	hit	0.012	0.758	13	113.4	4.2	68.65	19.3	18.65	751	hit	Myh9	;NM_022410	;NP_071855	Mus musculus myosin, heavy polypeptide 9, non-muscle (Myh9), mRNA.			22254
chr6	118459100	118459400	hit	0.01	0.624	7	113.35	4.3	69.6	12.1	6.4	151	hit	Zfp248	NM_028335	NP_082611	Mus musculus zinc finger protein 248 (Zfp248), mRNA.			-3594
chr12	109528100	109528400	hit	0.076	0.79	10.8	113.3	4	86.75	18	9	2926	hit	Meg3	;NR_027651;NR_027652		Mus musculus maternally expressed 3 (Meg3), transcript variant 2, long non-coding RNA.;Mus musculus maternally expressed 3 (Meg3), transcript variant 3, long non-coding RNA.			-12595
chr6	118459050	118459350	hit	0.01	0.64	11	113.1	7.8	67.85	13	9.5	144	hit	Zfp248	NM_028335	NP_082611	Mus musculus zinc finger protein 248 (Zfp248), mRNA.			-3544
chr13	102992700	102993000	hit	0.022	0.674	9.5	113.1	6	72.95	4	5	243	hit	Mast4			Mus musculus microtubule associated serine/threonine kinase family member 4 (Mast4), mRNA.			-205251
chr7	127549550	127549850	hit	0.022	0.726	13.65	113.1	5.75	73.05	21.35	8.75	513	hit	Tmem265	NM_001304267	NP_001291196	Mus musculus transmembrane protein 265 (Tmem265), mRNA.			-11372
chr14	66282290	66282590	hit	0.014	0.738	13.8	113	9.1	65.65	11.45	11.4	1552	hit	Ptk2b	NM_001162365;NM_172498	NP_001155837;NP_766086	Mus musculus PTK2 protein tyrosine kinase 2 beta (Ptk2b), transcript variant 2, mRNA.;Mus musculus PTK2 protein tyrosine kinase 2 beta (Ptk2b), transcript variant 3, mRNA.			-1238
chr10	41001900	41002200	hit	0.006	0.69	1	113	6.55	98.95	4.9	10.8	355	hit	AK080786			Mus musculus 9.5 days embryo parthenogenote cDNA, RIKEN full-length enriched library, clone:B130055L14 product:WASP family 1, full insert sequence.			63725
chr1	120357370	120357670	hit	0.024	0.72	19.8	112.9	2	89.9	16	11.95	4315	hit	C1ql2	NM_207233	NP_997116	Mus musculus complement component 1, q subcomponent-like 2 (C1ql2), mRNA.			16788
chr5	122693180	122693480	hit	0.028	0.684	14	112.85	7.45	87.05	13.95	20	933	hit	Mir8115	NR_106195		Mus musculus microRNA mir-8115 (Mir8115), microRNA.			10583
chr2	60142310	60142610	hit	0.02	0.69	17.1	112.7	12.05	103.45	22.25	15.7	1355	hit	Baz2b	;NM_001001182	;NP_001001182	Mus musculus bromodomain adjacent to zinc finger domain, 2B (Baz2b), mRNA.			-16500
chr9	40821790	40822090	hit	0.038	0.778	13.35	112.7	5.2	107.05	15.75	14.4	5510	hit	Hspa8	;NM_031165	;NP_112442	Mus musculus heat shock protein 8 (Hspa8), mRNA.			20517
chr14	31337640	31337940	hit	0.024	0.628	12.2	112.6	4.8	60.2	21.1	15.05	888	hit	Capn7	;NM_009796	;NP_033926	Mus musculus calpain 7 (Capn7), mRNA.			916
chr2	168763080	168763380	hit	0.014	0.626	6	112.3	4.5	63.3	18.25	12.05	2707	hit	AK052878			Mus musculus 16 days neonate heart cDNA, RIKEN full-length enriched library, clone:D830018J03 product:unclassifiable, full insert sequence.			-2762
chr8	83593720	83594020	hit	0.052	0.778	12	112.15	3.7	59.95	13.55	19.75	4098	hit	Tecr	NM_027179;NM_134118	NP_081455;NP_598879	Mus musculus trans-2,3-enoyl-CoA reductase (Tecr), transcript variant 1, mRNA.;Mus musculus trans-2,3-enoyl-CoA reductase (Tecr), transcript variant 2, mRNA.			470
chr4	147260570	147260870	hit	0.002	0.516	17.35	112.15	6	50.25	28	36.25	61	hit	Gm13152	NM_001039209	NP_001034298	Mus musculus predicted gene 13152 (Gm13152), mRNA.			7275
chr4	145625890	145626190	hit	0.002	0.488	12.75	112.1	5.3	52.05	11.1	7.5	34	hit	Gm13212	NM_001205101	NP_001192030	Mus musculus predicted gene 13212 (Gm13212), mRNA.			8772
chr18	67087260	67087560	hit	0.024	0.792	11	112.1	4	71.95	13.9	6	574	hit	Gnal	NM_177137	NP_796111	Mus musculus guanine nucleotide binding protein, alpha stimulating, olfactory type (Gnal), transcript variant 2, mRNA.			-737
chr12	73052120	73052420	hit	0.046	0.804	13.25	111.85	7.65	98.6	20.65	17.15	8545	hit	Six1	NM_009189	NP_033215	Mus musculus sine oculis-related homeobox 1 (Six1), mRNA.			-5408
chr13	102993450	102993750	hit	0.022	0.686	6.85	111.75	3.4	65.55	11	6.8	250	hit	Mast4			Mus musculus microtubule associated serine/threonine kinase family member 4 (Mast4), mRNA.			-206001
chr18	36938000	36938300	hit	0.008	0.464	16.95	111.4	3	78.4	12	15.5	33	hit	Pcdha2	NM_198117	NP_932785	Mus musculus protocadherin alpha 2 (Pcdha2), mRNA.			-904
chr4	109735430	109735730	hit	0.012	0.622	14.6	111.25	4.85	41.95	18.45	14.45	650	hit	Faf1			Mus musculus Fas-associated factor 1 (Faf1), mRNA.			-860
chr9	40820080	40820380	hit	0.008	0.748	7.15	111.2	10.45	71.7	17.3	15.45	550	hit	Hspa8	;NM_031165	;NP_112442	Mus musculus heat shock protein 8 (Hspa8), mRNA.			18807
chr15	102981340	102981640	hit	0.096	0.87	5.55	111.2	4	112.65	9	16	7014	hit	Hoxc9	NM_008272	NP_032298	Mus musculus homeobox C9 (Hoxc9), mRNA.			4308
chr14	31338220	31338520	hit	0.01	0.64	9.2	111.15	5	77	18.15	4	782	hit	Capn7	;NM_009796	;NP_033926	Mus musculus calpain 7 (Capn7), mRNA.			1496
chr10	108161230	108161530	hit	0.058	0.756	16.5	111.1	12.45	91.6	13	10.65	5348	hit	Ppp1r12a	;NM_027892	;NP_082168	Mus musculus protein phosphatase 1, regulatory (inhibitor) subunit 12A (Ppp1r12a), mRNA.			-869
chr10	12609060	12609360	hit	0.02	0.656	8.2	111	2	90.5	14.45	6.25	356	hit	Utrn			Mus musculus utrophin (Utrn), mRNA.			5530
chr6	118459500	118459800	hit	0.008	0.628	10.35	110.95	6	70.9	12.1	12.1	241	hit	Zfp248	NM_028335	NP_082611	Mus musculus zinc finger protein 248 (Zfp248), mRNA.			-3994
chr9	36725700	36726000	hit	0.03	0.726	14.85	110.85	6.8	78.65	18.05	31.3	2287	hit	Chek1	NM_007691	NP_031717	Mus musculus checkpoint kinase 1 (Chek1), mRNA.			373
chr4	116995740	116996040	hit	0.098	0.974	15	110.85	5	121.2	20.65	22.45	10987	hit	Hectd3	NM_175244	NP_780453	Mus musculus HECT domain containing 3 (Hectd3), mRNA.			392
chr7	66693790	66694090	hit	0.014	0.67	5	110.8	7	45.2	15.5	6.9	616	hit	Lins	;NM_001191001;NM_152815;NR_034030	;NP_001177930;NP_690028	Mus musculus lines homolog (Drosophila) (Lins), transcript variant 1, mRNA.;Mus musculus lines homolog (Drosophila) (Lins), transcript variant 2, mRNA.;Mus musculus lines homolog (Drosophila) (Lins), transcript variant 3, non-coding RNA.			3901
chr4	80909760	80910060	hit	0.008	0.554	14	110.7	5	73.7	5.55	18.65	174	hit	Lurap1l	NM_026821	NP_081097	Mus musculus leucine rich adaptor protein 1-like (Lurap1l), mRNA.			-625
chr9	65523800	65524100	hit	0.028	0.74	23.5	110.7	7.1	112.55	17.7	20.5	9257	hit	AK153351			Mus musculus bone marrow macrophage cDNA, RIKEN full-length enriched library, clone:I830144M07 product:unclassifiable, full insert sequence.			5705
chr19	5393640	5393940	hit	0.024	0.738	13	110.5	5.7	73.35	7.2	9.3	822	hit	Tsga10ip			SubName: Full=Protein Tsga10ip ;			460
chr2	77520050	77520350	hit	0.026	0.64	1.3	110.3	3	72.55	14	7.5	441	hit	Zfp385b	NM_001113400	NP_001106871	Mus musculus zinc finger protein 385B (Zfp385b), transcript variant 3, mRNA.			-384
chr6	135326860	135327160	hit	0.026	0.75	15.05	110.3	9.3	55.2	15.1	7.05	491	hit	AK036949			Mus musculus adult female vagina cDNA, RIKEN full-length enriched library, clone:9930029E19 product:unclassifiable, full insert sequence.			-7299
chr4	80910700	80911000	hit	0.066	0.786	16.6	110.25	7	115.45	11.35	8.55	4841	hit	Lurap1l	NM_026821	NP_081097	Mus musculus leucine rich adaptor protein 1-like (Lurap1l), mRNA.			14
chr2	91977670	91977970	hit	0.012	0.684	11	110.2	2.85	68	15.45	12.95	625	hit	Dgkz	NM_138306	NP_612179	Mus musculus diacylglycerol kinase zeta (Dgkz), transcript variant 2, mRNA.			-12070
chr12	69983140	69983440	hit	0.016	0.628	8.1	110.2	4.1	71.9	12.95	10.7	1112	hit	Sav1	NM_022028	NP_071311	Mus musculus salvador homolog 1 (Drosophila) (Sav1), mRNA.			3561
chr12	29534560	29534860	hit	0.044	0.77	9	110.15	2	104.2	13	7.55	5539	hit	Myt1l	NM_001093776	NP_032692	Mus musculus myelin transcription factor 1-like (Myt1l), transcript variant 3, mRNA.			-44
chr6	34709660	34709960	hit	0.032	0.804	13.6	110.1	12.5	148.05	26.9	5	8571	hit	Cald1	NM_145575	NP_663550	Mus musculus caldesmon 1 (Cald1), mRNA.			216
chr10	108161390	108161690	hit	0.094	0.852	18.6	109.85	9.85	80.4	14.8	13.55	11176	hit	Ppp1r12a	;NM_027892	;NP_082168	Mus musculus protein phosphatase 1, regulatory (inhibitor) subunit 12A (Ppp1r12a), mRNA.			-709
chr11	120949940	120950240	hit	0.036	0.816	12.65	109.85	2.05	102.45	15.4	4.2	4433	hit	Slc16a3	NM_001038653;NM_001038654	NP_109621	Mus musculus solute carrier family 16 (monocarboxylic acid transporters), member 3 (Slc16a3), mRNA.			873
chr8	114205800	114206100	hit	0.09	0.93	11.1	109.85	4	90.5	10.9	10.6	4470	hit	Vat1l	NM_173016	NP_766604	Mus musculus vesicle amine transport protein 1 homolog-like (T. californica) (Vat1l), mRNA.			160
chr7	49521340	49521640	hit	0.018	0.794	8.5	109.7	9.15	112.2	17.55	22	2831	hit	AK088944			Mus musculus 2 days neonate thymus thymic cells cDNA, RIKEN full-length enriched library, clone:E430032N19 product:unclassifiable, full insert sequence.			-32251
chr12	84892070	84892370	hit	0.024	0.774	7	109.7	4	99.05	9.8	20.3	747	hit	Ltbp2	;NM_013589	;NP_038617	Mus musculus latent transforming growth factor beta binding protein 2 (Ltbp2), mRNA.			-15575
chr6	118459260	118459560	hit	0.01	0.616	7	109.6	2.35	68.25	14.15	8	165	hit	Zfp248	NM_028335	NP_082611	Mus musculus zinc finger protein 248 (Zfp248), mRNA.			-3754
chr2	172583190	172583490	hit	0.016	0.802	23	109.55	10	73.95	18.35	20.2	2891	hit	Tfap2c	NM_001159696	NP_001153168	Mus musculus transcription factor AP-2, gamma (Tfap2c), transcript variant 2, mRNA.			32199
chr12	73051420	73051720	hit	0.02	0.626	9.05	109.55	5.25	80.15	12.05	19.45	1658	hit	Six1	NM_009189	NP_033215	Mus musculus sine oculis-related homeobox 1 (Six1), mRNA.			-4708
chr7	49521290	49521590	hit	0.02	0.784	9	109.5	8.4	105.55	16.7	21.75	2830	hit	AK088944			Mus musculus 2 days neonate thymus thymic cells cDNA, RIKEN full-length enriched library, clone:E430032N19 product:unclassifiable, full insert sequence.			-32301
chr14	101517400	101517700	hit	0.02	0.512	13.55	109.35	4	77.9	15.4	12.95	1387	hit	Tbc1d4			Mus musculus TBC1 domain family, member 4 (Tbc1d4), mRNA.			-16284
chr14	66282650	66282950	hit	0.022	0.756	19.2	109.35	8.6	75.35	20.45	24	6818	hit	Ptk2b	NM_001162365;NM_172498	NP_001155837;NP_766086	Mus musculus PTK2 protein tyrosine kinase 2 beta (Ptk2b), transcript variant 2, mRNA.;Mus musculus PTK2 protein tyrosine kinase 2 beta (Ptk2b), transcript variant 3, mRNA.			-1598
chr16	34657610	34657910	hit	0.044	0.752	23.15	109.35	10	71.65	16.55	23.4	4270	hit	Ropn1	NM_030744	NP_109669	Mus musculus ropporin, rhophilin associated protein 1 (Ropn1), mRNA.			6399
chr5	134101820	134102120	hit	0.016	0.83	8.25	109.25	3	76.4	16.85	18.9	3358	hit	Gatsl2	NM_030719	NP_109644	Mus musculus GATS protein-like 2 (Gatsl2), mRNA.			2072
chr5	134101630	134101930	hit	0.014	0.798	5.8	109.2	4.6	65.75	15	14.4	3255	hit	Gatsl2	NM_030719	NP_109644	Mus musculus GATS protein-like 2 (Gatsl2), mRNA.			1882
chr3	88295760	88296060	hit	0.024	0.638	15.1	109.2	1.85	77.4	18.9	21.3	2338	hit	Tsacc	NM_029801	NP_084077	Mus musculus TSSK6 activating co-chaperone (Tsacc), mRNA.			777
chr11	77929150	77929450	hit	0.012	0.79	11.9	108.85	3	85.1	11	18.85	1835	hit	Gm11190	NR_033549		Mus musculus predicted gene 11190 (Gm11190), long non-coding RNA.			0
chr4	80910900	80911200	hit	0.098	0.87	10.45	108.8	4.4	96.3	9.1	12.5	6209	hit	Lurap1l	NM_026821	NP_081097	Mus musculus leucine rich adaptor protein 1-like (Lurap1l), mRNA.			214
chr6	100704110	100704410	hit	0.028	0.72	3.25	108.8	11.9	142.75	9.45	12	1362	hit	Gxylt2	NM_198612	NP_941014	Mus musculus glucoside xylosyltransferase 2 (Gxylt2), mRNA.			-323
chr15	77819950	77820250	hit	0.022	0.82	16.8	108.75	5.2	78.05	17	12	2268	hit	Myh9	;NM_022410	;NP_071855	Mus musculus myosin, heavy polypeptide 9, non-muscle (Myh9), mRNA.			21924
chr12	73052200	73052500	hit	0.042	0.816	14.4	108.75	6	103.95	28.35	16.2	9365	hit	Six1	NM_009189	NP_033215	Mus musculus sine oculis-related homeobox 1 (Six1), mRNA.			-5488
chr10	70096290	70096590	hit	0.054	0.796	16.2	108.7	6.4	108.9	16.25	17.75	4563	hit	Ccdc6	NM_001111121	NP_001104591	Mus musculus coiled-coil domain containing 6 (Ccdc6), mRNA.			-530
chr16	94126120	94126420	hit	0.046	0.794	6	108.4	4.55	93.95	7.05	8.1	1714	hit	Sim2			Mus musculus single-minded homolog 2 (Drosophila) (Sim2), mRNA.			3517
chr5	23418600	23418900	hit	0.086	0.786	10.3	108.4	1.6	133.25	15.35	13.45	11007	hit	AK017143;AK042126			Mus musculus 11 days pregnant adult female ovary and uterus cDNA, RIKEN full-length enriched library, clone:5031425E22 product:unclassifiable, full insert sequence.;Mus musculus 3 days neonate thymus cDNA, RIKEN full-length enriched library, clone:A630061A06 product:unclassifiable, full insert sequence.			14435
chr14	105675100	105675400	hit	0.006	0.664	9.75	108.35	7	63.65	10.65	9.2	188	hit	AK045385			Mus musculus adult male corpora quadrigemina cDNA, RIKEN full-length enriched library, clone:B230112B02 product:unclassifiable, full insert sequence.			-31375
chr2	172795910	172796210	hit	0.026	0.812	12	107.6	4	70.7	15.75	16.2	383	hit	BC116387			Mus musculus cDNA clone IMAGE:40101788.			-66219
chr11	120949870	120950170	hit	0.042	0.826	12	107.6	3.55	99.8	14.35	10.9	4272	hit	Slc16a3	NM_001038653;NM_001038654	NP_109621	Mus musculus solute carrier family 16 (monocarboxylic acid transporters), member 3 (Slc16a3), mRNA.			803
chr4	133241760	133242060	hit	0.054	0.808	24.4	107.45	7.15	99.85	21.25	18.85	14396	hit	Map3k6	NM_016693	NP_057902	Mus musculus mitogen-activated protein kinase kinase kinase 6 (Map3k6), mRNA.			942
chr11	109667280	109667580	hit	0.048	0.746	4.55	107.4	4	77.55	7	20.4	437	hit	Prkar1a	NM_021880	NP_068680	Mus musculus protein kinase, cAMP dependent regulatory, type I, alpha (Prkar1a), mRNA.			16331
chr1	135818300	135818600	hit	0.108	0.95	15.25	107.4	11.95	102.85	25.55	15.3	6446	hit	Lad1	NM_133664	NP_598425	Mus musculus ladinin (Lad1), mRNA.			0
chr18	67088410	67088710	hit	0.164	1.116	5.45	107	3	86.85	7.75	6.85	13151	hit	Gnal	NM_177137	NP_796111	Mus musculus guanine nucleotide binding protein, alpha stimulating, olfactory type (Gnal), transcript variant 2, mRNA.			112
chr4	80910860	80911160	hit	0.09	0.852	13.65	107	5	99.75	7.8	13.05	5267	hit	Lurap1l	NM_026821	NP_081097	Mus musculus leucine rich adaptor protein 1-like (Lurap1l), mRNA.			174
chr15	100873470	100873770	hit	0.042	0.752	12.4	107	4.45	66	11	12.8	2828	hit	Scn8a			Mus musculus sodium channel, voltage-gated, type VIII, alpha (Scn8a), transcript variant 1, mRNA.			2443
chr15	7173120	7173420	hit	0.018	0.678	11	107	12	132.05	11.55	8.85	383	hit	Lifr	NM_001113386;NM_013584	;NP_038612	Mus musculus leukemia inhibitory factor receptor (Lifr), transcript variant 1, mRNA.			32578
chr6	34708430	34708730	hit	0.028	0.766	9	106.95	5.75	169.65	17.45	12	2125	hit	Cald1	NM_145575	NP_663550	Mus musculus caldesmon 1 (Cald1), mRNA.			-713
chr2	119776850	119777150	hit	0.016	0.796	8	106.95	3	98.8	8	6	352	hit	Rpap1			Mus musculus RNA polymerase II associated protein 1 (Rpap1), transcript variant 2, mRNA.			10361
chr3	97228930	97229230	hit	0.018	0.628	12	106.9	4.7	65	17.85	20	612	hit	Bcl9	NM_029933	NP_084209	Mus musculus B cell CLL/lymphoma 9 (Bcl9), mRNA.			-1566
chr1	39556800	39557100	hit	0.02	0.632	5.2	106.8	6	67.7	12.5	18	331	hit	AK040602			Mus musculus 0 day neonate thymus cDNA, RIKEN full-length enriched library, clone:A430108H20 product:RIKEN cDNA 1600023E10 gene, full insert sequence.			-4798
chr10	63311740	63312040	hit	0.038	0.734	13.65	106.7	7.35	56.75	14.8	8.35	416	hit	Sirt1	NM_001159589;NM_019812	NP_001153061;NP_062786	Mus musculus sirtuin 1 (Sirt1), transcript variant 1, mRNA.;Mus musculus sirtuin 1 (Sirt1), transcript variant 2, mRNA.			26994
chr7	18961310	18961610	hit	0.03	0.806	14.8	106.55	4.75	90.35	17.2	17	2602	hit	Nanos2	NM_194064	NP_918953	Mus musculus nanos homolog 2 (Drosophila) (Nanos2), mRNA.			-25913
chr6	143184860	143185160	hit	0.014	0.64	10.75	106.35	12.55	119.9	26.7	19.05	1422	hit	Etnk1	NM_029250	NP_083526	Mus musculus ethanolamine kinase 1 (Etnk1), mRNA.			17630
chr16	77040860	77041160	hit	0.012	0.64	14.35	106.2	6.5	74.6	14.3	7.5	330	hit	Usp25	NM_013918	NP_038946	Mus musculus ubiquitin specific peptidase 25 (Usp25), mRNA.			26791
chr4	109735580	109735880	hit	0.006	0.646	10.9	106.1	5	54.65	20.95	17.4	1189	hit	Faf1			Mus musculus Fas-associated factor 1 (Faf1), mRNA.			-710
chr14	66635690	66635990	hit	0.056	0.866	7.3	106.05	7	94.35	14	14.4	3700	hit	Adra1a	NM_001271759;NM_001271760;NM_001271761;NM_013461	NP_001258688;NP_001258690;NP_038489	Mus musculus adrenergic receptor, alpha 1a (Adra1a), transcript variant 1, mRNA.;Mus musculus adrenergic receptor, alpha 1a (Adra1a), transcript variant 2, mRNA.;Mus musculus adrenergic receptor, alpha 1a (Adra1a), transcript variant 3, mRNA.;Mus musculus adrenergic receptor, alpha 1a (Adra1a), transcript variant 4, mRNA.			439
chr1	39556860	39557160	hit	0.02	0.634	4	106.05	4.3	65.3	12.2	16.1	310	hit	AK040602			Mus musculus 0 day neonate thymus cDNA, RIKEN full-length enriched library, clone:A430108H20 product:RIKEN cDNA 1600023E10 gene, full insert sequence.			-4858
chr8	114205840	114206140	hit	0.078	0.892	10.75	105.95	4.7	80.8	11	9	4284	hit	Vat1l	NM_173016	NP_766604	Mus musculus vesicle amine transport protein 1 homolog-like (T. californica) (Vat1l), mRNA.			200
chr3	79838760	79839060	hit	0.034	0.706	8.2	105.75	5	55.9	11	11.35	1476	hit	Tmem144	NM_027495	NP_081771	Mus musculus transmembrane protein 144 (Tmem144), mRNA.			2668
chr11	97115890	97116190	hit	0.038	0.812	11.35	105.7	3.35	80.2	19.5	14.85	1907	hit	Tbx21	NM_019507	NP_062380	Mus musculus T-box 21 (Tbx21), mRNA.			-559
chr9	56825400	56825700	hit	0.046	0.848	7.3	105.65	6	60.9	23.1	16.95	6333	hit	Odf3l1	NM_198673	NP_941075	Mus musculus outer dense fiber of sperm tails 3-like 1 (Odf3l1), mRNA.			26262
chr9	32635480	32635780	hit	0.018	0.708	2.2	105.6	4	71.1	5	13.75	1286	hit	Ets1			Mus musculus E26 avian leukemia oncogene 1, 5' domain (Ets1), transcript variant 2, mRNA.			-440
chr16	48580570	48580870	hit	0.028	0.716	6.1	105.6	6	72.65	16	15.5	0	hit	Morc1			Mus musculus microrchidia 1 (Morc1), mRNA.			-30833
chr2	119776900	119777200	hit	0.016	0.802	7.1	105.5	2	97.45	8.45	5.85	325	hit	Rpap1			Mus musculus RNA polymerase II associated protein 1 (Rpap1), transcript variant 2, mRNA.			10311
chr11	111887220	111887520	hit	0.016	0.666	3.3	105.4	3	57.45	7.05	6.2	212	hit	AB350709			Mus musculus non-coding RNA, oocyte_piRNA1525, complete sequence.			543943
chr8	114206010	114206310	hit	0.06	0.832	14	105.35	3	83.2	6.75	2.75	2259	hit	Vat1l	NM_173016	NP_766604	Mus musculus vesicle amine transport protein 1 homolog-like (T. californica) (Vat1l), mRNA.			370
chr17	45473150	45473450	hit	0.022	0.76	7.6	105.35	3.15	89.55	11	13.9	653	hit	Spats1	;NM_027649	;NP_081925	Mus musculus spermatogenesis associated, serine-rich 1 (Spats1), mRNA.			1487
chr19	55380920	55381220	hit	0.032	0.634	25.75	105.35	9	72.55	13	8	3486	hit	Vti1a	NM_001293685;NM_001293686;NM_016862	NP_001280614;NP_001280615;NP_058558	Mus musculus vesicle transport through interaction with t-SNAREs 1A (Vti1a), transcript variant 1, mRNA.;Mus musculus vesicle transport through interaction with t-SNAREs 1A (Vti1a), transcript variant 2, mRNA.;Mus musculus vesicle transport through interaction with t-SNAREs 1A (Vti1a), transcript variant 3, mRNA.			64863
chr4	101264490	101264790	hit	0.124	0.996	15.35	105.35	7	92.6	23.55	14.9	11799	hit	Jak1	NM_146145	NP_666257	Mus musculus Janus kinase 1 (Jak1), mRNA.			491
chr6	115456380	115456680	hit	0.004	0.662	17.85	105.2	3.45	73.05	25	17.75	247	hit	Pparg	NM_001127330	NP_001120802	Mus musculus peroxisome proliferator activated receptor gamma (Pparg), transcript variant 2, mRNA.			16540
chr18	36938040	36938340	hit	0.008	0.466	16.1	105.15	2	73	11.35	11.65	32	hit	Pcdha2	NM_198117	NP_932785	Mus musculus protocadherin alpha 2 (Pcdha2), mRNA.			-864
chr15	36505530	36505830	hit	0.026	0.734	22	105.05	13	87.45	37	31.4	3746	hit	Ankrd46	NM_175134	NP_780343	Mus musculus ankyrin repeat domain 46 (Ankrd46), mRNA.			-8739
chr5	118372640	118372940	hit	0.014	0.682	4	104.95	2	81.55	9.35	15.25	410	hit	2410131K14Rik	NM_001081236	NP_001074705	Mus musculus RIKEN cDNA 2410131K14 gene (2410131K14Rik), mRNA.			127413
chr2	158557600	158557900	hit	0.014	0.758	7.8	104.9	5	88.85	6	10.25	459	hit	Arhgap40	NM_001145015	NP_001138487	Mus musculus Rho GTPase activating protein 40 (Arhgap40), mRNA.			44804
chr14	50925230	50925530	hit	0.088	0.85	15.65	104.75	2.4	85.8	16.4	18.95	7591	hit	Apex1	NM_009687	NP_033817	Mus musculus apurinic/apyrimidinic endonuclease 1 (Apex1), mRNA.			281
chr14	54686480	54686780	hit	0.15	0.996	18.95	104.7	7.15	100.9	32.4	28.55	48014	hit	Acin1	NM_001085473;NM_023190	NP_001078942;NP_075679	Mus musculus apoptotic chromatin condensation inducer 1 (Acin1), transcript variant 2, mRNA.;Mus musculus apoptotic chromatin condensation inducer 1 (Acin1), transcript variant 4, mRNA.			150
chr11	120949800	120950100	hit	0.046	0.84	11.5	104.55	4	90.8	12	15.1	3679	hit	Slc16a3	NM_001038653;NM_001038654	NP_109621	Mus musculus solute carrier family 16 (monocarboxylic acid transporters), member 3 (Slc16a3), mRNA.			733
chr1	165426940	165427240	hit	0.004	0.534	6	104.5	5	71.65	10	23	157	hit	Dcaf6	NM_028759	NP_083035	Mus musculus DDB1 and CUL4 associated factor 6 (Dcaf6), mRNA.			33222
chr17	7533500	7533800	hit	0.014	0.738	13.75	104.5	5.6	59.75	12.95	11.85	479	hit	Gm9992	NM_001142539	NP_001136011	Mus musculus predicted gene 9992 (Gm9992), mRNA.			-148195
chr4	150956880	150957180	hit	0.026	0.754	9.4	104.45	3.7	129.6	9.5	11.2	566	hit	Tnfrsf9	NM_001077509	NP_035742	Mus musculus tumor necrosis factor receptor superfamily, member 9 (Tnfrsf9), transcript variant 3, mRNA.			28881
chr16	77042640	77042940	hit	0.016	0.63	6	104.4	6	73.8	5.8	13.5	213	hit	Usp25	NM_013918	NP_038946	Mus musculus ubiquitin specific peptidase 25 (Usp25), mRNA.			28571
chr9	107698390	107698690	hit	0.042	0.844	6	104.25	8	91.2	4.85	9	7985	hit	Sema3f	NM_011349	NP_035479	Mus musculus sema domain, immunoglobulin domain (Ig), short basic domain, secreted, (semaphorin) 3F (Sema3f), mRNA.			6900
chr9	73068470	73068770	hit	0.022	0.756	15	104.25	6	58.2	21.85	13	2142	hit	Rab27a	NM_001301232	NP_001288161	Mus musculus RAB27A, member RAS oncogene family (Rab27a), transcript variant 3, mRNA.			4322
chr11	109667180	109667480	hit	0.046	0.754	7.45	104.05	4	66.75	7.25	20	375	hit	Prkar1a	NM_021880	NP_068680	Mus musculus protein kinase, cAMP dependent regulatory, type I, alpha (Prkar1a), mRNA.			16231
chr3	51524820	51525120	hit	0.028	0.818	9.1	104.05	2	93.3	10.7	17.45	1206	hit	AK037895			Mus musculus 16 days neonate thymus cDNA, RIKEN full-length enriched library, clone:A130060I07 product:SET domain-containing protein 7, full insert sequence.			26199
chr10	41001840	41002140	hit	0.008	0.67	2.65	103.8	3	95.3	7.55	11.3	353	hit	AK080786			Mus musculus 9.5 days embryo parthenogenote cDNA, RIKEN full-length enriched library, clone:B130055L14 product:WASP family 1, full insert sequence.			63665
chr2	119776740	119777040	hit	0.024	0.806	6.7	103.5	3.45	82.6	4.95	10.4	363	hit	Rpap1			Mus musculus RNA polymerase II associated protein 1 (Rpap1), transcript variant 2, mRNA.			10471
chr5	29478860	29479160	hit	0.066	0.874	16.65	103.5	3	67.85	20.1	17	8947	hit	Mnx1	NM_019944	NP_064328	Mus musculus motor neuron and pancreas homeobox 1 (Mnx1), mRNA.			-390
chr14	105677320	105677620	hit	0.02	0.66	6.55	103.3	3.6	57	11.6	13.6	273	hit	AK045385			Mus musculus adult male corpora quadrigemina cDNA, RIKEN full-length enriched library, clone:B230112B02 product:unclassifiable, full insert sequence.			-33595
chr13	111510920	111511220	hit	0.032	0.81	5.2	103.1	2	73.35	13	9.8	2683	hit	Gpbp1	NM_001122963;NM_028487	NP_001116435;NP_082763	Mus musculus GC-rich promoter binding protein 1 (Gpbp1), transcript variant 1, mRNA.;Mus musculus GC-rich promoter binding protein 1 (Gpbp1), transcript variant 2, mRNA.			-20879
chr3	122984230	122984530	hit	0.174	1.116	27.75	103.1	9.35	106.5	29.05	28.8	54336	hit	Usp53	;NM_133857	;NP_598618	Mus musculus ubiquitin specific peptidase 53 (Usp53), mRNA.			0
chr13	64121200	64121500	hit	0.006	0.658	9.85	103.1	7	87	17	9	377	hit	Slc35d2	;NM_001001321	;NP_001001321	Mus musculus solute carrier family 35, member D2 (Slc35d2), mRNA.			7829
chr6	100438120	100438420	hit	0.024	0.782	1	102.9	8.65	147.85	18.3	21	3437	hit	1700049E22Rik	NR_040525		Mus musculus RIKEN cDNA 1700049E22 gene (1700049E22Rik), long non-coding RNA.			-88979
chr19	23165520	23165820	hit	0.044	0.634	17.15	102.9	4.75	64.9	7.35	14	226	hit	Mir1192	NR_035423		Mus musculus microRNA 1192 (Mir1192), microRNA.			16089
chr5	100820040	100820340	hit	0.038	0.66	11.05	102.85	3.95	62.35	12.7	15.4	2435	hit	Fam175a	;NM_172405	;NP_765993	Mus musculus family with sequence similarity 175, member A (Fam175a), mRNA.			594
chr7	19641200	19641500	hit	0.014	0.732	6.7	102.8	6	49.5	19.1	8.6	403	hit	Relb	NM_001290457;NM_009046	;NP_001277386;NP_033072	Mus musculus avian reticuloendotheliosis viral (v-rel) oncogene related B (Relb), transcript variant 1, mRNA.			-11762
chrX	77508240	77508540	hit	0.002	0.602	6.05	102.65	5	75.35	16	18.45	236	hit	Tbl1x	NM_020601	NP_065626	Mus musculus transducin (beta)-like 1 X-linked (Tbl1x), mRNA.			-2686
chr10	59877940	59878240	hit	0.028	0.736	12.7	102.6	3	66.95	19.7	16.95	820	hit	Dnajb12	;NM_019965	;NP_064349	Mus musculus DnaJ (Hsp40) homolog, subfamily B, member 12 (Dnajb12), mRNA.			-1350
chr2	172796060	172796360	hit	0.018	0.762	8.35	102.6	3	66.4	7.95	21.75	324	hit	BC116387			Mus musculus cDNA clone IMAGE:40101788.			-66069
chr10	105839640	105839940	hit	0.024	0.634	3.15	102.5	7	57.25	6.6	14	159	hit	Mettl25	;NM_207522	;NP_997405	Mus musculus methyltransferase like 25 (Mettl25), mRNA.			1439
chr6	72165010	72165310	hit	0.032	0.75	6.5	102.4	13.95	118.3	38.05	29.45	9063	hit	AK039589			Mus musculus adult male spinal cord cDNA, RIKEN full-length enriched library, clone:A330068C15 product:unclassifiable, full insert sequence.			2161
chr4	80910960	80911260	hit	0.104	0.9	10.45	102.25	3.25	84.8	12.85	14.65	6957	hit	Lurap1l	NM_026821	NP_081097	Mus musculus leucine rich adaptor protein 1-like (Lurap1l), mRNA.			274
chr11	69073030	69073330	hit	0.036	0.678	21	102.1	4	161.75	28	25.85	17566	hit	Tmem107	NM_025838;NM_028336	NP_080114;NP_082612	Mus musculus transmembrane protein 107 (Tmem107), transcript variant 1, mRNA.;Mus musculus transmembrane protein 107 (Tmem107), transcript variant 2, mRNA.			2221
chr2	75955720	75956020	hit	0.036	0.8	15	102	4.95	69.2	8.25	17	2367	hit	Ttc30b	NM_028235	NP_082511	Mus musculus tetratricopeptide repeat domain 30B (Ttc30b), mRNA.			-17258
chr11	22972720	22973020	hit	0.11	0.896	13.95	102	11.65	124.25	27.55	36.35	8642	hit	Zrsr1	NM_011663	NP_035793	Mus musculus zinc finger (CCCH type), RNA binding motif and serine/arginine rich 1 (Zrsr1), mRNA.			715
chr8	120962650	120962950	hit	0.012	0.85	13.8	101.95	2	91	14.7	18	347	hit	Fendrr			Mus musculus Foxf1 adjacent non-coding developmental regulatory RNA (Fendrr), transcript variant 1, long non-coding RNA.			97778
chr7	18963020	18963320	hit	0.062	0.922	11.4	101.9	8	94.8	23.55	16.8	4267	hit	Nanos2	NM_194064	NP_918953	Mus musculus nanos homolog 2 (Drosophila) (Nanos2), mRNA.			-24203
chr4	116143900	116144200	hit	0.052	0.834	16.4	101.8	6	63.95	11.15	22.9	3499	hit	Lurap1	NM_026547	NP_080823	Mus musculus leucine rich adaptor protein 1 (Lurap1), mRNA.			415
chr17	33841340	33841640	hit	0.008	0.676	9.1	101.75	6	97.2	11	7	635	hit	Cd320	NM_019421	NP_062294	Mus musculus CD320 antigen (Cd320), transcript variant 1, mRNA.			-1450
chr6	143185000	143185300	hit	0.014	0.682	9	101.6	10.7	96.4	15.15	10.6	1311	hit	Etnk1	NM_029250	NP_083526	Mus musculus ethanolamine kinase 1 (Etnk1), mRNA.			17770
chr8	123806200	123806500	hit	0.098	0.942	11.25	101.4	4	92.75	20.55	20.6	9295	hit	Rab4a	NM_009003	NP_033029	Mus musculus RAB4A, member RAS oncogene family (Rab4a), mRNA.			204
chr4	40743730	40744030	hit	0.022	0.718	13.4	101.25	7.15	64.8	20.25	11.15	473	hit	Smu1	NM_021535	NP_067510	Mus musculus smu-1 suppressor of mec-8 and unc-52 homolog (C. elegans) (Smu1), mRNA.			13854
chr10	115571460	115571760	hit	0.016	0.588	1.45	101.2	2.7	80.7	10.75	6	1408	hit	A930009A15Rik	NM_029982	NP_084258	Mus musculus RIKEN cDNA A930009A15 gene (A930009A15Rik), mRNA.			1474
chr1	9202210	9202510	hit	0.004	0.6	5.95	101.15	5	72.85	14.05	9.6	149	hit	Sntg1	;NM_001290390;NM_001290392;NM_001290393;NM_027671	;NP_001277321	Mus musculus syntrophin, gamma 1 (Sntg1), transcript variant 1, mRNA.;Mus musculus syntrophin, gamma 1 (Sntg1), transcript variant 2, mRNA.;Mus musculus syntrophin, gamma 1 (Sntg1), transcript variant 3, mRNA.;Mus musculus syntrophin, gamma 1 (Sntg1), transcript variant 4, mRNA.			97366
chr7	19641050	19641350	hit	0.014	0.708	5.15	101.15	6.3	47.7	21.45	13	383	hit	Relb	NM_001290457;NM_009046	;NP_001277386;NP_033072	Mus musculus avian reticuloendotheliosis viral (v-rel) oncogene related B (Relb), transcript variant 1, mRNA.			-11612
chr4	80909660	80909960	hit	0.004	0.584	6.55	101.15	3.85	68.8	9	15	99	hit	Lurap1l	NM_026821	NP_081097	Mus musculus leucine rich adaptor protein 1-like (Lurap1l), mRNA.			-725
chr7	18963180	18963480	hit	0.06	0.922	12	101.1	6	99	22.6	17	3792	hit	Nanos2	NM_194064	NP_918953	Mus musculus nanos homolog 2 (Drosophila) (Nanos2), mRNA.			-24043
chr5	100820190	100820490	hit	0.074	0.76	12.75	101.1	4.3	61.5	18.05	24.15	5989	hit	Fam175a	;NM_172405	;NP_765993	Mus musculus family with sequence similarity 175, member A (Fam175a), mRNA.			444
chr6	120579440	120579740	hit	0.044	0.85	28.2	101	5.85	91.05	15.85	15.9	5197	hit	1700072O05Rik	NR_045733		Mus musculus RIKEN cDNA 1700072O05 gene (1700072O05Rik), long non-coding RNA.			24644
chr15	6241710	6242010	hit	0.022	0.654	5	101	4.65	49.45	12.8	14.25	600	hit	AB335791			Mus musculus non-coding RNA, oocyte_clustered_small_RNA992, complete sequence.			13968
chr19	7477540	7477840	hit	0.004	0.564	19.85	100.95	4.15	48.25	19	18.1	262	hit	Snord118	NR_028566		Mus musculus small nucleolar RNA, C/D box 118 (Snord118), small nucleolar RNA.			-677
chr14	61331240	61331540	hit	0.026	0.798	15.65	100.95	4.25	70.6	24.05	28	8636	hit	Arl11	NM_177337	NP_796311	Mus musculus ADP-ribosylation factor-like 11 (Arl11), mRNA.			20497
chr1	77496110	77496410	hit	0.02	0.66	16	100.85	6	58.7	10	16.1	1130	hit	Mir6352	NR_105770		Mus musculus microRNA 6352 (Mir6352), microRNA.			357
chr4	116995580	116995880	hit	0.132	1.054	12.1	100.75	6.8	97.05	16.95	15.95	8957	hit	Hectd3	NM_175244	NP_780453	Mus musculus HECT domain containing 3 (Hectd3), mRNA.			232
chr6	34709730	34710030	hit	0.036	0.8	13.75	100.65	12.7	151.35	31.05	7.35	7000	hit	Cald1	NM_145575	NP_663550	Mus musculus caldesmon 1 (Cald1), mRNA.			286
chr15	95664700	95665000	hit	0.02	0.558	2	100.6	2	73.85	12.8	19.6	107	hit	Dbx2	NM_207533	NP_997416	Mus musculus developing brain homeobox 2 (Dbx2), mRNA.			-9929
chr4	101263760	101264060	hit	0.012	0.574	10	100.55	7.15	68.35	13.2	9.6	466	hit	Jak1	NM_146145	NP_666257	Mus musculus Janus kinase 1 (Jak1), mRNA.			1221
chr11	77929100	77929400	hit	0.012	0.78	11	100.4	2.55	72.9	11	13.6	1715	hit	Gm11190	NR_033549		Mus musculus predicted gene 11190 (Gm11190), long non-coding RNA.			0
chr18	67087120	67087420	hit	0.028	0.796	14.35	100.35	6	64.75	13.5	7.4	611	hit	Gnal	NM_177137	NP_796111	Mus musculus guanine nucleotide binding protein, alpha stimulating, olfactory type (Gnal), transcript variant 2, mRNA.			-877
chr5	29479400	29479700	hit	0.052	0.75	14.45	100.3	3	78.75	33.6	21	7010	hit	Mnx1	NM_019944	NP_064328	Mus musculus motor neuron and pancreas homeobox 1 (Mnx1), mRNA.			-930
chr6	99098150	99098450	hit	0.012	0.618	5.85	100.25	7	157.5	14.8	6.65	334	hit	Foxp1	NM_001197322;NM_053202	NP_001184251;NP_444432	Mus musculus forkhead box P1 (Foxp1), transcript variant 1, mRNA.			64578
chrX	135009440	135009740	hit	0.044	0.66	7.1	100.2	3	81.75	12.8	20.4	6171	hit	Zmat1	NM_175446	NP_780655	Mus musculus zinc finger, matrin type 1 (Zmat1), mRNA.			-231
chr7	18963060	18963360	hit	0.06	0.92	11.65	100.1	7.05	100.7	22.35	17.45	4047	hit	Nanos2	NM_194064	NP_918953	Mus musculus nanos homolog 2 (Drosophila) (Nanos2), mRNA.			-24163
chr4	116995820	116996120	hit	0.082	0.954	16.5	100.05	5.7	116.8	22	26.8	9949	hit	Hectd3	NM_175244	NP_780453	Mus musculus HECT domain containing 3 (Hectd3), mRNA.			472
chr17	84571940	84572240	hit	0.042	0.638	7.05	99.8	6.35	38.05	7.9	9.1	1831	hit	Plekhh2	NM_177606	NP_808274	Mus musculus pleckstrin homology domain containing, family H (with MyTH4 domain) member 2 (Plekhh2), mRNA.			-23941
chr6	52031130	52031430	hit	0.022	0.702	11	99.7	6	146	19	30.55	2252	hit	Skap2	NM_018773	NP_061243	Mus musculus src family associated phosphoprotein 2 (Skap2), mRNA.			-18581
chr9	40819420	40819720	hit	0.016	0.664	9	99.7	8.85	59.9	12.4	14.6	697	hit	Hspa8	;NM_031165	;NP_112442	Mus musculus heat shock protein 8 (Hspa8), mRNA.			18147
chr1	89690220	89690520	hit	0.028	0.768	6	99.65	4	61.4	9.2	9	1010	hit	4933400F21Rik	;NR_015540		Mus musculus RIKEN cDNA 4933400F21 gene (4933400F21Rik), long non-coding RNA.			-6328
chr13	112469240	112469540	hit	0.016	0.59	18.6	99.65	5	56.15	7.7	8.5	421	hit	Il6st	;NM_010560	;NP_034690	Mus musculus interleukin 6 signal transducer (Il6st), mRNA.			5170
chr10	71268600	71268900	hit	0.018	0.672	12	99.6	5	56.65	12.25	20.3	426	hit	Ube2d1	NM_145420	NP_663395	Mus musculus ubiquitin-conjugating enzyme E2D 1 (Ube2d1), mRNA.			16361
chr9	73068060	73068360	hit	0.034	0.814	15	99.6	4	50.9	21	19.25	3279	hit	Rab27a	NM_001301232	NP_001288161	Mus musculus RAB27A, member RAS oncogene family (Rab27a), transcript variant 3, mRNA.			3912
chr17	33843140	33843440	hit	0.09	0.926	11.7	99.55	8.55	112.9	25.1	20.4	28257	hit	Cd320	NM_001305169	NP_001292098	Mus musculus CD320 antigen (Cd320), transcript variant 2, mRNA.			0
chr4	116143840	116144140	hit	0.042	0.824	15.1	99.45	4	67.05	13.25	19.1	2968	hit	Lurap1	NM_026547	NP_080823	Mus musculus leucine rich adaptor protein 1 (Lurap1), mRNA.			475
chr10	105839750	105840050	hit	0.014	0.606	5.4	99.35	4.3	55.4	6.9	8.15	148	hit	Mettl25	;NM_207522	;NP_997405	Mus musculus methyltransferase like 25 (Mettl25), mRNA.			1329
chr9	65826860	65827160	hit	0.08	0.928	19.95	99.35	5	93.1	26.95	18	11067	hit	Zfp609	NM_172536	NP_766124	Mus musculus zinc finger protein 609 (Zfp609), mRNA.			403
chr14	54650860	54651160	hit	0.044	0.786	6	99.25	8.35	62	16.35	9.65	7101	hit	4930579G18Rik	NR_038053		Mus musculus RIKEN cDNA 4930579G18 gene (4930579G18Rik), long non-coding RNA.			349
chr14	105675040	105675340	hit	0.006	0.648	11	99.2	5	62.1	12.3	9	176	hit	AK045385			Mus musculus adult male corpora quadrigemina cDNA, RIKEN full-length enriched library, clone:B230112B02 product:unclassifiable, full insert sequence.			-31315
chr4	116995920	116996220	hit	0.064	0.9	18.1	99.2	5	107.85	17.65	21.35	8745	hit	Hectd3	NM_175244	NP_780453	Mus musculus HECT domain containing 3 (Hectd3), mRNA.			572
chr5	148774780	148775080	hit	0.016	0.688	15.2	99.05	4.45	74.6	5	8	462	hit	4930505K14Rik	NR_131106		Mus musculus RIKEN cDNA 4930505K14 gene (4930505K14Rik), long non-coding RNA.			-2882
chr18	80257070	80257370	hit	0.054	0.806	12.55	99	6	84.65	20.2	18	4187	hit	Pqlc1	NM_025861	NP_080137	Mus musculus PQ loop repeat containing 1 (Pqlc1), transcript variant 1, mRNA.			763
chr8	92216260	92216560	hit	0.018	0.834	6.85	98.95	3	74.85	10.75	11.6	10436	hit	DQ693017			Mus musculus piRNA piR-108339, complete sequence.			22454
chr2	91977860	91978160	hit	0.01	0.74	5	98.9	2	72.95	14.3	10	759	hit	Dgkz	NM_138306	NP_612179	Mus musculus diacylglycerol kinase zeta (Dgkz), transcript variant 2, mRNA.			-12260
chr12	29534680	29534980	hit	0.06	0.778	11.25	98.8	4	75	17	7.2	4768	hit	Myt1l	NM_001093776	NP_032692	Mus musculus myelin transcription factor 1-like (Myt1l), transcript variant 3, mRNA.			0
chr7	144944170	144944470	hit	0.026	0.706	10.65	98.75	7.85	96.15	15.45	14.05	694	hit	Ccnd1	NM_007631	NP_031657	Mus musculus cyclin D1 (Ccnd1), mRNA.			-4245
chr3	27712350	27712650	hit	0.014	0.674	13.8	98.6	7	51.5	17.15	3	600	hit	Fndc3b			Mus musculus fibronectin type III domain containing 3B (Fndc3b), mRNA.			-1043
chr14	118090240	118090540	hit	0.038	0.71	19.95	98.6	7	82	20.05	9.95	3737	hit	TRNA_Phe			transfer RNA Phe (anticodon GAA)		chr14.tRNA462-PheGAA	-643
chr5	23418440	23418740	hit	0.086	0.804	8.1	98.45	4.8	106.7	27.75	12.4	13196	hit	AK017143;AK042126			Mus musculus 11 days pregnant adult female ovary and uterus cDNA, RIKEN full-length enriched library, clone:5031425E22 product:unclassifiable, full insert sequence.;Mus musculus 3 days neonate thymus cDNA, RIKEN full-length enriched library, clone:A630061A06 product:unclassifiable, full insert sequence.			14595
chr15	90788250	90788550	hit	0.014	0.736	7.55	98.3	6.7	79.4	10	8.05	334	hit	Cpne8	;NM_001033851;NM_025815	;NP_001029023;NP_080091	Mus musculus copine VIII (Cpne8), transcript variant 1, mRNA.;Mus musculus copine VIII (Cpne8), transcript variant 2, mRNA.			-108862
chr2	25180620	25180920	hit	0.152	1.034	15.55	98.3	7.2	85.45	24.6	28.65	34697	hit	Nrarp	NM_025980	NP_080256	Mus musculus Notch-regulated ankyrin repeat protein (Nrarp), mRNA.			0
chr6	118459610	118459910	hit	0.004	0.634	14.7	98.2	8.75	68.05	13	13.35	252	hit	Zfp248	NM_028335	NP_082611	Mus musculus zinc finger protein 248 (Zfp248), mRNA.			-4104
chr9	32636280	32636580	hit	0.024	0.694	13.8	98.2	6	89.85	7.3	6.35	4260	hit	Ets1			Mus musculus E26 avian leukemia oncogene 1, 5' domain (Ets1), transcript variant 2, mRNA.			59
chr11	62847860	62848160	hit	0.014	0.736	11	98.2	2	100.05	23.9	13.25	1201	hit	Fbxw10	;NM_001033669;NM_001291441	;NP_001028841;NP_001278370	Mus musculus F-box and WD-40 domain protein 10 (Fbxw10), transcript variant 1, mRNA.;Mus musculus F-box and WD-40 domain protein 10 (Fbxw10), transcript variant 2, mRNA.			737
chr6	34708290	34708590	hit	0.02	0.734	2	98	7.65	155.9	15.35	11	1214	hit	Cald1	NM_145575	NP_663550	Mus musculus caldesmon 1 (Cald1), mRNA.			-853
chr7	49523140	49523440	hit	0.022	0.742	19.85	97.9	5	75.25	15	18.8	3109	hit	AK088944			Mus musculus 2 days neonate thymus thymic cells cDNA, RIKEN full-length enriched library, clone:E430032N19 product:unclassifiable, full insert sequence.			-30451
chr2	25180540	25180840	hit	0.138	0.996	26.4	97.75	8	85.4	32.5	27.5	31798	hit	Nrarp	NM_025980	NP_080256	Mus musculus Notch-regulated ankyrin repeat protein (Nrarp), mRNA.			0
chr5	73159890	73160190	hit	0.014	0.602	8	97.55	4	57	13.95	8	345	hit	AK006930			Mus musculus adult male testis cDNA, RIKEN full-length enriched library, clone:1700071G01 product:unclassifiable, full insert sequence.			2876
chrX	135009500	135009800	hit	0.034	0.628	8	97.5	3	71.35	12.35	22.3	2906	hit	Zmat1	NM_175446	NP_780655	Mus musculus zinc finger, matrin type 1 (Zmat1), mRNA.			-291
chr6	120579600	120579900	hit	0.042	0.854	23.8	97.5	4	83.7	19.9	19.8	5395	hit	1700072O05Rik	NR_045733		Mus musculus RIKEN cDNA 1700072O05 gene (1700072O05Rik), long non-coding RNA.			24804
chr6	87671480	87671780	hit	0.052	0.752	1.7	97.4	8.5	94.95	17.65	17.7	2815	hit	Aplf	;NM_001170489;NM_024251	;NP_001163960;NP_077213	Mus musculus aprataxin and PNKP like factor (Aplf), transcript variant 1, mRNA.;Mus musculus aprataxin and PNKP like factor (Aplf), transcript variant 2, mRNA.			387
chr11	60830390	60830690	hit	0.058	0.732	19	97.15	5	104.05	41	33	18333	hit	Dhrs7b	NM_001172112;NM_145428	NP_001165583;NP_663403	Mus musculus dehydrogenase/reductase (SDR family) member 7B (Dhrs7b), transcript variant 1, mRNA.;Mus musculus dehydrogenase/reductase (SDR family) member 7B (Dhrs7b), transcript variant 2, mRNA.			0
chr6	115456520	115456820	hit	0.002	0.586	16.75	97.1	7	56.85	21.35	17.85	189	hit	Pparg	NM_001127330	NP_001120802	Mus musculus peroxisome proliferator activated receptor gamma (Pparg), transcript variant 2, mRNA.			16680
chr6	28201940	28202240	hit	0.024	0.7	2	97.1	3.95	143.65	23.15	7.25	324	hit	Zfp800	NM_001081678	NP_001075147	Mus musculus zinc finger protein 800 (Zfp800), mRNA.			59360
chr17	47925640	47925940	hit	0.038	0.844	18.25	97	4	86.85	8	5.85	3818	hit	Foxp4	;NM_001110824;NM_001110825;NM_028767	;NP_001104294;NP_001104295;NP_083043	Mus musculus forkhead box P4 (Foxp4), transcript variant 1, mRNA.;Mus musculus forkhead box P4 (Foxp4), transcript variant 2, mRNA.;Mus musculus forkhead box P4 (Foxp4), transcript variant 3, mRNA.			-1008
chr2	60142410	60142710	hit	0.01	0.684	18.1	97	13.05	95.25	16.1	12.65	1302	hit	Baz2b	;NM_001001182	;NP_001001182	Mus musculus bromodomain adjacent to zinc finger domain, 2B (Baz2b), mRNA.			-16600
chr4	109735640	109735940	hit	0.008	0.654	10	96.95	6.7	56.6	25.85	17	1406	hit	Faf1			Mus musculus Fas-associated factor 1 (Faf1), mRNA.			-650
chr14	105677380	105677680	hit	0.018	0.676	7	96.8	5	54.5	9.1	12.1	277	hit	AK045385			Mus musculus adult male corpora quadrigemina cDNA, RIKEN full-length enriched library, clone:B230112B02 product:unclassifiable, full insert sequence.			-33655
chr6	87671630	87671930	hit	0.064	0.804	5.35	96.75	10	83.4	35.85	23.05	6000	hit	Aplf	;NM_001170489;NM_024251	;NP_001163960;NP_077213	Mus musculus aprataxin and PNKP like factor (Aplf), transcript variant 1, mRNA.;Mus musculus aprataxin and PNKP like factor (Aplf), transcript variant 2, mRNA.			237
chr7	100492580	100492880	hit	0.072	0.902	12.45	96.7	6.15	90.9	15.85	14.15	9279	hit	Ucp2	NM_011671	NP_035801	Mus musculus uncoupling protein 2 (mitochondrial, proton carrier) (Ucp2), mRNA.			-477
chr2	119776620	119776920	hit	0.026	0.834	5.9	96.5	3	74	6	11	363	hit	Rpap1			Mus musculus RNA polymerase II associated protein 1 (Rpap1), transcript variant 2, mRNA.			10591
chr7	49521240	49521540	hit	0.022	0.762	3.95	96.45	7.2	91.95	12.4	22.3	2731	hit	AK088944			Mus musculus 2 days neonate thymus thymic cells cDNA, RIKEN full-length enriched library, clone:E430032N19 product:unclassifiable, full insert sequence.			-32351
chr15	95665100	95665400	hit	0.012	0.53	4.5	96.2	2.75	67.9	6	9.75	69	hit	Dbx2	NM_207533	NP_997416	Mus musculus developing brain homeobox 2 (Dbx2), mRNA.			-10329
chrX	49796900	49797200	hit	0.016	0.724	6	96.1	5.35	73.6	13.15	20.6	2039	hit	Igsf1	NM_177591;NM_177915	NP_808583;NP_899179	Mus musculus immunoglobulin superfamily, member 1 (Igsf1), transcript variant 1, mRNA.;Mus musculus immunoglobulin superfamily, member 1 (Igsf1), transcript variant 2, mRNA.			544
chr5	9113680	9113980	hit	0.01	0.684	11	96.05	6.75	41.95	13.8	11.7	574	hit	AK160408			Mus musculus adult male cerebellum cDNA, RIKEN full-length enriched library, clone:1500011L05 product:unclassifiable, full insert sequence.			-4126
chr1	9202270	9202570	hit	0.004	0.622	10.05	96	6	72.85	13.75	9.5	159	hit	Sntg1	;NM_001290390;NM_001290392;NM_001290393;NM_027671	;NP_001277321	Mus musculus syntrophin, gamma 1 (Sntg1), transcript variant 1, mRNA.;Mus musculus syntrophin, gamma 1 (Sntg1), transcript variant 2, mRNA.;Mus musculus syntrophin, gamma 1 (Sntg1), transcript variant 3, mRNA.;Mus musculus syntrophin, gamma 1 (Sntg1), transcript variant 4, mRNA.			97306
chr13	64121090	64121390	hit	0.008	0.656	7.4	96	9.25	83.25	14.6	11	452	hit	Slc35d2	;NM_001001321	;NP_001001321	Mus musculus solute carrier family 35, member D2 (Slc35d2), mRNA.			7939
chr1	69291170	69291470	hit	0.02	0.582	10.85	95.95	3.95	55.45	13.45	13	244	hit	Erbb4	NM_010154	NP_034284	Mus musculus v-erb-a erythroblastic leukemia viral oncogene homolog 4 (avian) (Erbb4), mRNA.			-183111
chr6	48627450	48627750	hit	0.048	0.884	6	95.8	8	131	16.3	17.5	4521	hit	AI854703	NR_027236		Mus musculus expressed sequence AI854703 (AI854703), non-coding RNA.			-416
chr4	116995380	116995680	hit	0.122	1.008	12.45	95.8	4.35	102.55	20.7	8.15	14474	hit	Hectd3	NM_175244	NP_780453	Mus musculus HECT domain containing 3 (Hectd3), mRNA.			32
chr7	127043370	127043670	hit	0.01	0.644	12	95.75	7.3	62.35	11.35	10.75	462	hit	Kif22	NM_145588	NP_663563	Mus musculus kinesin family member 22 (Kif22), mRNA.			-950
chr17	33843380	33843680	hit	0.072	0.896	7.9	95.75	3	90.9	19.5	14.9	14469	hit	Cd320	NM_001305169	NP_001292098	Mus musculus CD320 antigen (Cd320), transcript variant 2, mRNA.			0
chr12	29534600	29534900	hit	0.056	0.778	9	95.5	2.25	85.95	15.6	8.8	5478	hit	Myt1l	NM_001093776	NP_032692	Mus musculus myelin transcription factor 1-like (Myt1l), transcript variant 3, mRNA.			-4
chr13	100415440	100415740	hit	0.072	0.798	4	95.4	7	88.2	15	12.8	338	hit	Naip1	;NM_008670	;NP_032696	Mus musculus NLR family, apoptosis inhibitory protein 1 (Naip1), mRNA.			30770
chr5	103424390	103424690	hit	0.06	0.76	8.4	95.4	4	62.6	15	16	5907	hit	Ptpn13	;NM_011204	;NP_035334	Mus musculus protein tyrosine phosphatase, non-receptor type 13 (Ptpn13), mRNA.			-501
chr10	59879540	59879840	hit	0.156	1.02	11.15	95.3	4.3	133.7	19.7	23.1	44545	hit	Dnajb12	;NM_019965	;NP_064349	Mus musculus DnaJ (Hsp40) homolog, subfamily B, member 12 (Dnajb12), mRNA.			0
chr4	147904970	147905270	hit	0.072	0.872	15.6	95.3	8.65	93.35	20.75	20.55	19272	hit	Mfn2	NM_001285920;NM_001285921;NM_001285922;NM_133201	NP_573464	Mus musculus mitofusin 2 (Mfn2), transcript variant 1, mRNA.;Mus musculus mitofusin 2 (Mfn2), transcript variant 2, mRNA.;Mus musculus mitofusin 2 (Mfn2), transcript variant 3, mRNA.;Mus musculus mitofusin 2 (Mfn2), transcript variant 4, mRNA.			-61
chr6	99098280	99098580	hit	0.012	0.618	5.6	95.2	4.65	148.8	19.1	8.7	437	hit	Foxp1	NM_001197322;NM_053202	NP_001184251;NP_444432	Mus musculus forkhead box P1 (Foxp1), transcript variant 1, mRNA.			64448
chr8	128943360	128943660	hit	0.006	0.534	10	95.2	6	40	25.25	13.8	96	hit	Ccdc7	NM_001197041;NM_029061	NP_001183970;NP_083337	Mus musculus coiled-coil domain containing 7 (Ccdc7), transcript variant 1, mRNA.;Mus musculus coiled-coil domain containing 7 (Ccdc7), transcript variant 2, mRNA.			121831
chrX	77508280	77508580	hit	0.002	0.614	5.85	95.05	5	70.4	14.45	15.3	262	hit	Tbl1x	NM_020601	NP_065626	Mus musculus transducin (beta)-like 1 X-linked (Tbl1x), mRNA.			-2646
chr7	49523100	49523400	hit	0.024	0.748	20.05	94.8	4.05	84.05	14.6	21	3300	hit	AK088944			Mus musculus 2 days neonate thymus thymic cells cDNA, RIKEN full-length enriched library, clone:E430032N19 product:unclassifiable, full insert sequence.			-30491
chr19	25581800	25582100	hit	0.032	0.704	11.65	94.7	7.15	57.5	11.15	6.9	514	hit	Dmrt3	NM_177360	NP_796334	Mus musculus doublesex and mab-3 related transcription factor 3 (Dmrt3), mRNA.			-28436
chr11	120949640	120949940	hit	0.066	0.878	12	94.6	5.15	73.95	11.2	18.45	4655	hit	Slc16a3	NM_001038653;NM_001038654	NP_109621	Mus musculus solute carrier family 16 (monocarboxylic acid transporters), member 3 (Slc16a3), mRNA.			573
chr16	41884220	41884520	hit	0.01	0.568	6.15	94.45	5	46.85	6.4	15	115	hit	AK086355			Mus musculus 15 days embryo head cDNA, RIKEN full-length enriched library, clone:D930023J12 product:unclassifiable, full insert sequence.			-295887
chr10	112465120	112465420	hit	0.05	0.702	11	94.1	3	89.25	16.35	2	258	hit	Kcnc2			Mus musculus potassium voltage gated channel, Shaw-related subfamily, member 2 (Kcnc2), mRNA.			9512
chr9	56825810	56826110	hit	0.034	0.888	11.8	94.1	6.3	54.85	18.6	21.8	6659	hit	Odf3l1	NM_198673	NP_941075	Mus musculus outer dense fiber of sperm tails 3-like 1 (Odf3l1), mRNA.			25852
chr9	40821860	40822160	hit	0.044	0.776	11.35	94	3.2	87.1	18.8	11.7	4281	hit	Hspa8	;NM_031165	;NP_112442	Mus musculus heat shock protein 8 (Hspa8), mRNA.			20587
chr11	120949680	120949980	hit	0.06	0.868	10.05	93.95	4	77.8	10.85	16.85	4439	hit	Slc16a3	NM_001038653;NM_001038654	NP_109621	Mus musculus solute carrier family 16 (monocarboxylic acid transporters), member 3 (Slc16a3), mRNA.			613
chr16	91818700	91819000	hit	0.058	0.834	10.5	93.9	4	89.5	7.05	9.3	1597	hit	Itsn1			Mus musculus intersectin 1 (SH3 domain protein 1A) (Itsn1), transcript variant 2, mRNA.			-20615
chr17	33843470	33843770	hit	0.058	0.828	13.65	93.8	3.7	93.5	14.15	13.25	8867	hit	Cd320	NM_001305169	NP_001292098	Mus musculus CD320 antigen (Cd320), transcript variant 2, mRNA.			44
chr3	89101240	89101540	hit	0.06	0.832	4	93.7	4	61.2	9.4	18.45	3328	hit	Fdps	NM_001253751;NM_134469	NP_001240680;NP_608219	Mus musculus farnesyl diphosphate synthetase (Fdps), transcript variant 1, mRNA.;Mus musculus farnesyl diphosphate synthetase (Fdps), transcript variant 2, mRNA.			426
chr1	182281040	182281340	hit	0.022	0.764	11.65	93.6	4	44.25	20.65	19.2	3683	hit	Degs1	NM_007853	NP_031879	Mus musculus degenerative spermatocyte homolog 1 (Drosophila) (Degs1), mRNA.			1418
chr5	100819990	100820290	hit	0.03	0.63	13	93.45	5	57.6	16	16.6	2480	hit	Fam175a	;NM_172405	;NP_765993	Mus musculus family with sequence similarity 175, member A (Fam175a), mRNA.			644
chr19	7477500	7477800	hit	0.004	0.564	18.25	93.4	4	44.3	18.2	17.5	307	hit	Snord118	NR_028566		Mus musculus small nucleolar RNA, C/D box 118 (Snord118), small nucleolar RNA.			-717
chr7	18963230	18963530	hit	0.058	0.916	12.15	93.2	5.3	108.85	21.35	18.05	4317	hit	Nanos2	NM_194064	NP_918953	Mus musculus nanos homolog 2 (Drosophila) (Nanos2), mRNA.			-23993
chr12	29534640	29534940	hit	0.056	0.776	9.8	93.1	3	76.25	16.9	7	5222	hit	Myt1l	NM_001093776	NP_032692	Mus musculus myelin transcription factor 1-like (Myt1l), transcript variant 3, mRNA.			0
chr14	61331300	61331600	hit	0.022	0.786	17.4	93.05	10.8	69.7	23.7	29	8448	hit	Arl11	NM_177337	NP_796311	Mus musculus ADP-ribosylation factor-like 11 (Arl11), mRNA.			20557
chr11	69964850	69965150	hit	0.058	0.88	19.65	93.05	13	82.8	17.7	21.2	4809	hit	Cldn7	NM_001193619	NP_058583	Mus musculus claudin 7 (Cldn7), transcript variant 2, mRNA.			71
chr19	23165590	23165890	hit	0.044	0.648	19.9	92.95	7	65.55	10.4	18	258	hit	Mir1192	NR_035423		Mus musculus microRNA 1192 (Mir1192), microRNA.			16159
chr15	7173000	7173300	hit	0.02	0.686	12.15	92.9	6.1	127.8	11.85	10.9	387	hit	Lifr	NM_001113386;NM_013584	;NP_038612	Mus musculus leukemia inhibitory factor receptor (Lifr), transcript variant 1, mRNA.			32458
chr13	100415480	100415780	hit	0.068	0.748	5	92.8	8	80.85	17	14.1	295	hit	Naip1	;NM_008670	;NP_032696	Mus musculus NLR family, apoptosis inhibitory protein 1 (Naip1), mRNA.			30730
chr12	103155920	103156220	hit	0.014	0.694	5	92.7	4.1	49.2	9.1	7.45	331	hit	Prima1			Mus musculus proline rich membrane anchor 1 (Prima1), mRNA.			85905
chr10	105809000	105809300	hit	0.028	0.752	6	92.65	3.45	55.6	9.35	9.75	133	hit	Mettl25	;NM_207522	;NP_997405	Mus musculus methyltransferase like 25 (Mettl25), mRNA.			32079
chr12	69983480	69983780	hit	0.01	0.598	8.5	92.6	7.9	48.2	19.2	8	287	hit	Sav1	NM_022028	NP_071311	Mus musculus salvador homolog 1 (Drosophila) (Sav1), mRNA.			3221
chr7	139155550	139155850	hit	0.014	0.778	22.3	92.55	7.25	69.65	13.65	17.1	1997	hit	Stk32c	NM_021302	NP_001156012	Mus musculus serine/threonine kinase 32C (Stk32c), transcript variant 1, mRNA.			32643
chr4	101263620	101263920	hit	0.006	0.56	7	92.5	6	54.1	9	12.6	423	hit	Jak1	NM_146145	NP_666257	Mus musculus Janus kinase 1 (Jak1), mRNA.			1361
chr4	116995960	116996260	hit	0.054	0.894	18.25	92.5	5	104.1	13.9	17.05	8759	hit	Hectd3	NM_175244	NP_780453	Mus musculus HECT domain containing 3 (Hectd3), mRNA.			612
chr2	77519340	77519640	hit	0.048	0.694	1.55	92.45	4.15	59	9.2	11	4485	hit	Zfp385b	NM_001113400	NP_001106871	Mus musculus zinc finger protein 385B (Zfp385b), transcript variant 3, mRNA.			25
chr12	105583950	105584250	hit	0.03	0.786	21.55	92.4	3.1	63.4	19.2	15.1	1557	hit	Bdkrb1	NM_007539	NP_031565	Mus musculus bradykinin receptor, beta 1 (Bdkrb1), mRNA.			-19840
chr5	148774930	148775230	hit	0.016	0.706	19.55	92.35	5	74.1	9	14.5	274	hit	4930505K14Rik	NR_131106		Mus musculus RIKEN cDNA 4930505K14 gene (4930505K14Rik), long non-coding RNA.			-2732
chr15	77819560	77819860	hit	0.012	0.738	15.15	92.3	4.75	49	17	18	645	hit	Myh9	;NM_022410	;NP_071855	Mus musculus myosin, heavy polypeptide 9, non-muscle (Myh9), mRNA.			22314
chr8	25118240	25118540	hit	0.026	0.826	5.65	92.15	5.25	64.55	18.2	18	1179	hit	Plekha2	NM_031257	NP_112547	Mus musculus pleckstrin homology domain-containing, family A (phosphoinositide binding specific) member 2 (Plekha2), mRNA.			-16046
chr15	102981000	102981300	hit	0.056	0.84	8.05	92	5	86.1	8.15	12.4	4228	hit	Hoxc9	NM_008272	NP_032298	Mus musculus homeobox C9 (Hoxc9), mRNA.			3968
chr3	27712180	27712480	hit	0.01	0.65	6.65	92	3.35	53.35	11.95	2	395	hit	Fndc3b			Mus musculus fibronectin type III domain containing 3B (Fndc3b), mRNA.			-873
chr9	106202260	106202560	hit	0.026	0.716	13.05	91.95	3.2	60.9	11.9	26.2	2302	hit	Twf2	NM_011876	NP_036006	Mus musculus twinfilin, actin-binding protein, homolog 2 (Drosophila) (Twf2), mRNA.			-547
chr6	87671330	87671630	hit	0.028	0.656	3.9	91.85	7.45	89.2	22.2	20.75	1296	hit	Aplf	;NM_001170489;NM_024251	;NP_001163960;NP_077213	Mus musculus aprataxin and PNKP like factor (Aplf), transcript variant 1, mRNA.;Mus musculus aprataxin and PNKP like factor (Aplf), transcript variant 2, mRNA.			537
chr4	107876470	107876770	hit	0.022	0.618	17.4	91.7	6	124.95	22.1	2.6	356	hit	Magoh	NM_001282737	NP_001269666	Mus musculus mago-nashi homolog, proliferation-associated (Drosophila) (Magoh), mRNA.			-2984
chr8	106289320	106289620	hit	0.014	0.758	18.9	91.6	5	88.2	14.5	19.8	1902	hit	4930506A18Rik	NR_126090;NR_126091		Mus musculus RIKEN cDNA 4930506A18 gene (4930506A18Rik), transcript variant 1, long non-coding RNA.;Mus musculus RIKEN cDNA 4930506A18 gene (4930506A18Rik), transcript variant 2, long non-coding RNA.			7091
chr8	128943320	128943620	hit	0.006	0.534	12	91.6	7	39.1	28.65	12	113	hit	Ccdc7	NM_001197041;NM_029061	NP_001183970;NP_083337	Mus musculus coiled-coil domain containing 7 (Ccdc7), transcript variant 1, mRNA.;Mus musculus coiled-coil domain containing 7 (Ccdc7), transcript variant 2, mRNA.			121871
chr14	105677540	105677840	hit	0.022	0.696	12.9	91.5	6	48.8	9.45	11.3	343	hit	AK045385			Mus musculus adult male corpora quadrigemina cDNA, RIKEN full-length enriched library, clone:B230112B02 product:unclassifiable, full insert sequence.			-33815
chr3	86755330	86755630	hit	0.018	0.64	16.25	91.4	7	40.9	15.8	12	514	hit	Dclk2			Mus musculus doublecortin-like kinase 2 (Dclk2), transcript variant 3, mRNA.			38282
chr13	29810360	29810660	hit	0.014	0.558	5	91.2	5	39.05	14	5	505	hit	Cdkal1	;NM_144536	;NP_653119	Mus musculus CDK5 regulatory subunit associated protein 1-like 1 (Cdkal1), mRNA.			44927
chr1	39556410	39556710	hit	0.022	0.728	16.25	91.2	3	58.6	20	14.2	829	hit	AK040602			Mus musculus 0 day neonate thymus cDNA, RIKEN full-length enriched library, clone:A430108H20 product:RIKEN cDNA 1600023E10 gene, full insert sequence.			-4408
chr4	141228660	141228960	hit	0.02	0.796	15.55	91.15	6	87.95	18.6	9.7	575	hit	Arhgef19	NM_172520	NP_766108	Mus musculus Rho guanine nucleotide exchange factor (GEF) 19 (Arhgef19), mRNA.			-13923
chr6	24527140	24527440	hit	0.098	0.896	4	90.9	9	141.8	20.85	16.65	7240	hit	Ndufa5	NM_026614	NP_080890	Mus musculus NADH dehydrogenase (ubiquinone) 1 alpha subcomplex, 5 (Ndufa5), mRNA.			246
chr17	33843240	33843540	hit	0.09	0.934	10.1	90.85	8	102.35	24.6	19	20390	hit	Cd320	NM_001305169	NP_001292098	Mus musculus CD320 antigen (Cd320), transcript variant 2, mRNA.			0
chr11	69066860	69067160	hit	0.032	0.778	29.55	90.8	10.5	128.45	39	24.8	9383	hit	TRNA_Trp			transfer RNA Trp (anticodon CCA)		chr11.tRNA1820-TrpCCA	-3294
chr6	24527220	24527520	hit	0.102	0.914	1.6	90.5	11.75	146.2	25.45	20.15	14460	hit	Ndufa5	NM_026614	NP_080890	Mus musculus NADH dehydrogenase (ubiquinone) 1 alpha subcomplex, 5 (Ndufa5), mRNA.			166
chr10	116422760	116423060	hit	0.012	0.61	6	90.2	3	64.05	5.05	9.55	377	hit	Kcnmb4os1	NR_028107		Mus musculus potassium large conductance calcium-activated channel, subfamily M, beta member 4, opposite strand 1 (Kcnmb4os1), long non-coding RNA.			4639
chr2	131263340	131263640	hit	0.036	0.648	15.4	90.1	4	63.7	27.05	7	2815	hit	Pank2			Mus musculus pantothenate kinase 2 (Pank2), mRNA.			501
chr7	49521100	49521400	hit	0.024	0.758	8.95	90.05	3.05	68.3	12.15	18.7	1705	hit	AK088944			Mus musculus 2 days neonate thymus thymic cells cDNA, RIKEN full-length enriched library, clone:E430032N19 product:unclassifiable, full insert sequence.			-32491
chr13	109633300	109633600	hit	0.014	0.606	11.25	90	4	49.6	15.75	15.8	2904	hit	AB351889			Mus musculus non-coding RNA, oocyte_piRNA2705, complete sequence.			40579
chr12	73052360	73052660	hit	0.04	0.85	10.45	89.95	2	90	26.9	13	8428	hit	Six1	NM_009189	NP_033215	Mus musculus sine oculis-related homeobox 1 (Six1), mRNA.			-5648
chr2	163870600	163870900	hit	0.028	0.792	9.2	89.95	2.15	93.85	15.8	13.2	1026	hit	Kcnk15	NM_001030292	NP_001025463	Mus musculus potassium channel, subfamily K, member 15 (Kcnk15), mRNA.			16850
chr4	107876710	107877010	hit	0.02	0.674	7.6	89.9	4.1	100.75	19.85	6	382	hit	Magoh	NM_001282737	NP_001269666	Mus musculus mago-nashi homolog, proliferation-associated (Drosophila) (Magoh), mRNA.			-2744
chr10	79614080	79614380	hit	0.086	0.946	25	89.9	9.45	75.8	26.3	20.1	25910	hit	C2cd4c	NM_001168624	NP_941016	Mus musculus C2 calcium-dependent domain containing 4C (C2cd4c), transcript variant 2, mRNA.			-55
chr1	179531160	179531460	hit	0.02	0.612	7.45	89.9	5	54	7	17.1	199	hit	Tfb2m			Mus musculus transcription factor B2, mitochondrial (Tfb2m), mRNA.			2261
chr8	91865440	91865740	hit	0.026	0.848	14.4	89.75	4.25	95.75	20	16.6	7927	hit	Irx3	NM_001253822;NM_008393	NP_001240751;NP_032419	Mus musculus Iroquois related homeobox 3 (Irx3), transcript variant 1, mRNA.;Mus musculus Iroquois related homeobox 3 (Irx3), transcript variant 2, mRNA.			-63786
chrX	77434000	77434300	hit	0.024	0.714	6	89.75	4.05	66.25	27.05	16	1388	hit	JA187517			Sequence 38 from Patent WO2011020005.			-68478
chr4	107876620	107876920	hit	0.018	0.618	11.25	89.55	5.35	106.95	17.9	5	402	hit	Magoh	NM_001282737	NP_001269666	Mus musculus mago-nashi homolog, proliferation-associated (Drosophila) (Magoh), mRNA.			-2834
chr17	69422020	69422320	hit	0.018	0.654	15	89.5	5	91.55	4	14	1122	hit	C030034I22Rik	NR_026848		Mus musculus RIKEN cDNA C030034I22 gene (C030034I22Rik), long non-coding RNA.			5573
chr6	34709810	34710110	hit	0.03	0.794	12	89.5	11.65	153.95	29.35	9.4	5528	hit	Cald1	NM_145575	NP_663550	Mus musculus caldesmon 1 (Cald1), mRNA.			366
chr12	4354370	4354670	hit	0.014	0.524	13.3	89.5	12	97.4	33.25	21.6	294	hit	Ncoa1	NM_010881	NP_035011	Mus musculus nuclear receptor coactivator 1 (Ncoa1), mRNA.			0
chr5	147001150	147001450	hit	0.014	0.678	10	89.45	5.4	65.55	7.45	9	302	hit	Mtif3	NM_001256100;NM_001256101;NM_001256102;NM_029581	NP_083857	Mus musculus mitochondrial translational initiation factor 3 (Mtif3), transcript variant 1, mRNA.;Mus musculus mitochondrial translational initiation factor 3 (Mtif3), transcript variant 2, mRNA.;Mus musculus mitochondrial translational initiation factor 3 (Mtif3), transcript variant 3, mRNA.;Mus musculus mitochondrial translational initiation factor 3 (Mtif3), transcript variant 4, mRNA.			-37353
chr10	115571400	115571700	hit	0.016	0.598	0	89.3	2	74.05	11	4.5	1560	hit	A930009A15Rik	NM_029982	NP_084258	Mus musculus RIKEN cDNA A930009A15 gene (A930009A15Rik), mRNA.			1414
chr18	41986290	41986590	hit	0.034	0.738	9.75	89.25	4	67.2	9	5.8	188	hit	Grxcr2	NM_001033426	NP_001028598	Mus musculus glutaredoxin, cysteine rich 2 (Grxcr2), mRNA.			12458
chr10	43002350	43002650	hit	0.046	0.758	13.45	89.2	5.3	42.85	13	12.7	4980	hit	Scml4	NM_172938	NP_766526	Mus musculus sex comb on midleg-like 4 (Drosophila) (Scml4), mRNA.			62469
chr10	112465300	112465600	hit	0.048	0.694	6.55	89.05	6	66.85	15.1	3	299	hit	Kcnc2			Mus musculus potassium voltage gated channel, Shaw-related subfamily, member 2 (Kcnc2), mRNA.			9692
chr6	87671560	87671860	hit	0.058	0.794	4	88.95	9	89.3	27.5	17	4181	hit	Aplf	;NM_001170489;NM_024251	;NP_001163960;NP_077213	Mus musculus aprataxin and PNKP like factor (Aplf), transcript variant 1, mRNA.;Mus musculus aprataxin and PNKP like factor (Aplf), transcript variant 2, mRNA.			307
chr4	147260400	147260700	hit	0.006	0.526	22.05	88.9	4	49.9	30.8	17.75	60	hit	Gm13152	NM_001039209	NP_001034298	Mus musculus predicted gene 13152 (Gm13152), mRNA.			7105
chr15	37231140	37231440	hit	0.016	0.716	11.45	88.55	4	54.95	10.15	6.85	1234	hit	Grhl2	NM_026496	NP_080772	Mus musculus grainyhead-like 2 (Drosophila) (Grhl2), mRNA.			-1595
chr3	27712080	27712380	hit	0.01	0.628	10	88.25	3	62.4	13.45	6	333	hit	Fndc3b			Mus musculus fibronectin type III domain containing 3B (Fndc3b), mRNA.			-773
chr4	141228420	141228720	hit	0.022	0.772	15	88.2	4	79.35	19.65	10.6	373	hit	Arhgef19	NM_172520	NP_766108	Mus musculus Rho guanine nucleotide exchange factor (GEF) 19 (Arhgef19), mRNA.			-14163
chr7	18963280	18963580	hit	0.052	0.9	10.55	88.1	5	108.1	20.15	14.9	4530	hit	Nanos2	NM_194064	NP_918953	Mus musculus nanos homolog 2 (Drosophila) (Nanos2), mRNA.			-23943
chr9	32636430	32636730	hit	0.024	0.698	12.3	88.1	3.85	68.8	6.6	4.8	1253	hit	Ets1			Mus musculus E26 avian leukemia oncogene 1, 5' domain (Ets1), transcript variant 2, mRNA.			209
chr3	97228730	97229030	hit	0.028	0.644	11	88.05	4	57.2	7.5	16.75	973	hit	Bcl9	NM_029933	NP_084209	Mus musculus B cell CLL/lymphoma 9 (Bcl9), mRNA.			-1366
chr12	106232790	106233090	hit	0.016	0.81	11.3	88.05	3	66.9	8.5	9.35	233	hit	1700121N20Rik	NR_036593		Mus musculus RIKEN cDNA 1700121N20 gene (1700121N20Rik), long non-coding RNA.			214575
chr2	60142480	60142780	hit	0.01	0.682	19	87.95	12.2	81.3	14.55	11.25	1044	hit	Baz2b	;NM_001001182	;NP_001001182	Mus musculus bromodomain adjacent to zinc finger domain, 2B (Baz2b), mRNA.			-16670
chr6	101378480	101378780	hit	0.03	0.684	7.1	87.85	8	139.45	18.55	5	9156	hit	Pdzrn3	;NM_018884	;NP_061372	Mus musculus PDZ domain containing RING finger 3 (Pdzrn3), mRNA.			-583
chr18	67086660	67086960	hit	0.01	0.786	13	87.7	10.9	73.45	13.95	13.7	429	hit	Gnal	NM_177137	NP_796111	Mus musculus guanine nucleotide binding protein, alpha stimulating, olfactory type (Gnal), transcript variant 2, mRNA.			-1337
chr14	66635910	66636210	hit	0.064	0.846	9	87.7	10	86.5	22.25	14.2	3655	hit	Adra1a	NM_001271759;NM_001271760;NM_001271761;NM_013461	NP_001258688;NP_001258690;NP_038489	Mus musculus adrenergic receptor, alpha 1a (Adra1a), transcript variant 1, mRNA.;Mus musculus adrenergic receptor, alpha 1a (Adra1a), transcript variant 2, mRNA.;Mus musculus adrenergic receptor, alpha 1a (Adra1a), transcript variant 3, mRNA.;Mus musculus adrenergic receptor, alpha 1a (Adra1a), transcript variant 4, mRNA.			659
chr9	65523570	65523870	hit	0.018	0.67	11	87.6	5.9	82.25	27.25	16	1407	hit	AK153351			Mus musculus bone marrow macrophage cDNA, RIKEN full-length enriched library, clone:I830144M07 product:unclassifiable, full insert sequence.			5935
chr6	120579230	120579530	hit	0.042	0.85	26.2	87.6	10.1	83.3	15.75	18.95	6173	hit	1700072O05Rik	NR_045733		Mus musculus RIKEN cDNA 1700072O05 gene (1700072O05Rik), long non-coding RNA.			24434
chr12	105582680	105582980	hit	0.038	0.826	15.15	87.55	8.8	64.5	25.15	18.75	2235	hit	Bdkrb2	NM_009747	NP_033877	Mus musculus bradykinin receptor, beta 2 (Bdkrb2), mRNA.			19508
chr6	125166380	125166680	hit	0.036	0.91	21.05	87.55	10.6	85.8	14.05	18.05	21935	hit	Gapdh	NM_001289726	NP_001276655	Mus musculus glyceraldehyde-3-phosphate dehydrogenase (Gapdh), transcript variant 1, mRNA.			0
chr8	83593520	83593820	hit	0.04	0.72	9.15	87.5	4.15	55.05	15	14	1637	hit	Tecr	NM_027179;NM_134118	NP_081455;NP_598879	Mus musculus trans-2,3-enoyl-CoA reductase (Tecr), transcript variant 1, mRNA.;Mus musculus trans-2,3-enoyl-CoA reductase (Tecr), transcript variant 2, mRNA.			670
chr18	36939160	36939460	hit	0.058	0.756	12.65	87.4	2.5	66.95	17	22.7	531	hit	Pcdha2	NM_198117	NP_932785	Mus musculus protocadherin alpha 2 (Pcdha2), mRNA.			0
chr5	118373700	118374000	hit	0.048	0.79	11.25	87.4	6.5	93.1	14.3	7	6919	hit	2410131K14Rik	NM_001081236	NP_001074705	Mus musculus RIKEN cDNA 2410131K14 gene (2410131K14Rik), mRNA.			128473
chr13	112469160	112469460	hit	0.02	0.618	16	87.35	8	49.2	5.55	10.55	306	hit	Il6st	;NM_010560	;NP_034690	Mus musculus interleukin 6 signal transducer (Il6st), mRNA.			5090
chr18	36793770	36794070	hit	0.066	0.8	21.8	87.3	8.35	79.05	27.8	34.65	30206	hit	Zmat2	NM_025594	NP_079870	Mus musculus zinc finger, matrin type 2 (Zmat2), mRNA.			0
chr7	27178360	27178660	hit	0.072	0.914	20.6	87.2	8.25	53.8	34.35	29.05	42992	hit	Rab4b	NM_029391	NP_083667	Mus musculus RAB4B, member RAS oncogene family (Rab4b), mRNA.			222
chr13	64120600	64120900	hit	0.018	0.632	11.8	87.2	6	73.85	16.9	11	445	hit	Slc35d2	;NM_001001321	;NP_001001321	Mus musculus solute carrier family 35, member D2 (Slc35d2), mRNA.			8429
chr12	105582720	105583020	hit	0.036	0.822	13.2	87.2	10.3	63.8	26.2	19.9	1972	hit	Bdkrb2	NM_009747	NP_033877	Mus musculus bradykinin receptor, beta 2 (Bdkrb2), mRNA.			19548
chr5	100077970	100078270	hit	0.042	0.714	8.6	86.95	5.1	51.05	8.95	12.4	1437	hit	Tmem150cos	NR_045993		Mus musculus transmembrane protein 150C, opposite strand (Tmem150cos), long non-coding RNA.			8
chr5	115272200	115272500	hit	0.132	1.008	6.75	86.95	2.55	83.75	21.6	11	9523	hit	Rnf10	NM_001302448;NM_001302449;NM_016698	NP_001289377;NP_001289378;NP_057907	Mus musculus ring finger protein 10 (Rnf10), transcript variant 1, mRNA.;Mus musculus ring finger protein 10 (Rnf10), transcript variant 2, mRNA.;Mus musculus ring finger protein 10 (Rnf10), transcript variant 3, mRNA.			394
chr15	48790020	48790320	hit	0.072	0.812	8.45	86.8	8.95	74.1	15.05	5.5	3588	hit	Csmd3	;NM_001081391	;NP_001074860	Mus musculus CUB and Sushi multiple domains 3 (Csmd3), mRNA.			1668
chr15	48790060	48790360	hit	0.07	0.808	7	86.6	8	74.6	16.6	5	3651	hit	Csmd3	;NM_001081391	;NP_001074860	Mus musculus CUB and Sushi multiple domains 3 (Csmd3), mRNA.			1628
chr1	13587260	13587560	hit	0.028	0.65	4	86.55	5.5	41.5	8.6	17	598	hit	Tram1	NM_028173	NP_082449	Mus musculus translocating chain-associating membrane protein 1 (Tram1), mRNA.			2349
chr18	25089040	25089340	hit	0.012	0.796	11.95	86.55	7	58.6	7.2	15.6	742	hit	Fhod3			Mus musculus formin homology 2 domain containing 3 (Fhod3), transcript variant 2, mRNA.			22823
chr6	97216330	97216630	hit	0.008	0.656	2	86.25	4	113.65	18.65	13.5	396	hit	Arl6ip5	NM_022992	NP_075368	Mus musculus ADP-ribosylation factor-like 6 interacting protein 5 (Arl6ip5), mRNA.			5538
chr5	75150920	75151220	hit	0.07	0.856	13.95	86.1	4.25	47.35	14.7	13.65	9014	hit	Pdgfra	NM_011058	NP_035188	Mus musculus platelet derived growth factor receptor, alpha polypeptide (Pdgfra), transcript variant 1, mRNA.			-1070
chr2	152573990	152574290	hit	0.014	0.758	9.1	85.95	4.55	46.55	17.15	9.7	524	hit	Defb21	NM_207276	NP_997159	Mus musculus defensin beta 21 (Defb21), mRNA.			1246
chr12	76177640	76177940	hit	0.05	0.72	17	85.95	5	68.6	20.75	20.65	6345	hit	Esr2	NM_010157;NM_207707;NR_104386	;NP_034287;NP_997590	Mus musculus estrogen receptor 2 (beta) (Esr2), transcript variant 1, mRNA.;Mus musculus estrogen receptor 2 (beta) (Esr2), transcript variant 2, mRNA.;Mus musculus estrogen receptor 2 (beta) (Esr2), transcript variant 3, non-coding RNA.			-381
chr3	132904560	132904860	hit	0.02	0.692	4.9	85.75	7.7	79.4	8.25	13.6	201	hit	Gm29811	NR_102297;NR_102298		Mus musculus predicted gene, 29811 (Gm29811), transcript variant 1, long non-coding RNA.;Mus musculus predicted gene, 29811 (Gm29811), transcript variant 2, long non-coding RNA.			-25964
chr17	74942860	74943160	hit	0.022	0.694	13.7	85.75	7.7	61.85	8.65	10.65	347	hit	Ltbp1	NM_019919	NP_064303	Mus musculus latent transforming growth factor beta binding protein 1 (Ltbp1), transcript variant 1, mRNA.			-62368
chrX	102294500	102294800	hit	0.014	0.68	10.15	85.75	4	63.65	18.7	20	291	hit	Gm14858	NR_040285		Mus musculus predicted gene 14858 (Gm14858), long non-coding RNA.			41849
chr6	54379180	54379480	hit	0.012	0.738	3.95	85.75	3.75	75.45	18.65	11.9	329	hit	Prr15	NM_030024	NP_084300	Mus musculus proline rich 15 (Prr15), mRNA.			49921
chr4	80909350	80909650	hit	0.004	0.534	7.85	85.65	3.75	49.9	14.5	9.5	63	hit	Lurap1l	NM_026821	NP_081097	Mus musculus leucine rich adaptor protein 1-like (Lurap1l), mRNA.			-1035
chr14	66635840	66636140	hit	0.068	0.86	9	85.4	9	81.15	13.05	12.25	3184	hit	Adra1a	NM_001271759;NM_001271760;NM_001271761;NM_013461	NP_001258688;NP_001258690;NP_038489	Mus musculus adrenergic receptor, alpha 1a (Adra1a), transcript variant 1, mRNA.;Mus musculus adrenergic receptor, alpha 1a (Adra1a), transcript variant 2, mRNA.;Mus musculus adrenergic receptor, alpha 1a (Adra1a), transcript variant 3, mRNA.;Mus musculus adrenergic receptor, alpha 1a (Adra1a), transcript variant 4, mRNA.			589
chr4	107876850	107877150	hit	0.018	0.678	6	85.35	3	98.9	20.2	2	324	hit	Magoh	NM_001282737	NP_001269666	Mus musculus mago-nashi homolog, proliferation-associated (Drosophila) (Magoh), mRNA.			-2604
chr1	13587200	13587500	hit	0.028	0.634	5.85	85.35	4	42.3	9.6	16.55	516	hit	Tram1	NM_028173	NP_082449	Mus musculus translocating chain-associating membrane protein 1 (Tram1), mRNA.			2409
chr16	90533440	90533740	hit	0.032	0.782	6.05	85.1	3	80.45	13.7	13	1242	hit	AK033811			Mus musculus adult male epididymis cDNA, RIKEN full-length enriched library, clone:9230112I12 product:unclassifiable, full insert sequence.			92785
chr8	68882460	68882760	hit	0.022	0.718	12.5	85.05	7	45.05	13.05	13.9	1395	hit	AK170106			Mus musculus NOD-derived CD11c +ve dendritic cells cDNA, RIKEN full-length enriched library, clone:F630017G06 product:lipoprotein lipase, full insert sequence.			1902
chr15	100573580	100573880	hit	0.04	0.754	9	84.95	5	39.9	10.7	16	728	hit	Pou6f1	NM_010127	NP_034257	Mus musculus POU domain, class 6, transcription factor 1 (Pou6f1), transcript variant 2, mRNA.			6350
chr9	40819340	40819640	hit	0.016	0.634	10.4	84.95	5	50.55	10	14.4	692	hit	Hspa8	;NM_031165	;NP_112442	Mus musculus heat shock protein 8 (Hspa8), mRNA.			18067
chr7	18961160	18961460	hit	0.026	0.786	10.85	84.5	4	68.4	15.55	11.8	1410	hit	Nanos2	NM_194064	NP_918953	Mus musculus nanos homolog 2 (Drosophila) (Nanos2), mRNA.			-26063
chr3	141838810	141839110	hit	0.03	0.638	13	84.4	6.55	43.7	32.9	19.8	2452	hit	Bmpr1b	NM_001277218;NM_001277220	NP_001264149;NP_031586	Mus musculus bone morphogenetic protein receptor, type 1B (Bmpr1b), transcript variant 4, mRNA.;Mus musculus bone morphogenetic protein receptor, type 1B (Bmpr1b), transcript variant 5, mRNA.			92477
chr17	45474540	45474840	hit	0.06	0.826	26	84.4	5.85	74.2	21.35	32.4	8846	hit	Spats1	;NM_027649	;NP_081925	Mus musculus spermatogenesis associated, serine-rich 1 (Spats1), mRNA.			97
chr11	113872480	113872780	hit	0.034	0.822	10.75	84.35	4	103.35	18.8	14.75	1648	hit	Sdk2			Mus musculus sidekick homolog 2 (chicken) (Sdk2), mRNA.			-46261
chr5	134101340	134101640	hit	0.014	0.798	10	84.2	7.85	55.2	8	9.3	4613	hit	Gatsl2	NM_030719	NP_109644	Mus musculus GATS protein-like 2 (Gatsl2), mRNA.			1592
chr6	83288210	83288510	hit	0.03	0.856	4.5	84.05	4.4	99.15	17.7	15	3253	hit	Slc4a5	NM_001166067	NP_001159539	Mus musculus solute carrier family 4, sodium bicarbonate cotransporter, member 5 (Slc4a5), mRNA.			10798
chr2	163871710	163872010	hit	0.02	0.734	5	84.05	3	92	5.55	11.25	282	hit	Kcnk15	NM_001030292	NP_001025463	Mus musculus potassium channel, subfamily K, member 15 (Kcnk15), mRNA.			17960
chr9	65826900	65827200	hit	0.086	0.966	19.5	84	6	78.15	22.3	18.3	11407	hit	Zfp609	NM_172536	NP_766124	Mus musculus zinc finger protein 609 (Zfp609), mRNA.			363
chr6	48627600	48627900	hit	0.026	0.854	6.35	83.95	9.95	108.95	11.15	26.25	3070	hit	AI854703	NR_027236		Mus musculus expressed sequence AI854703 (AI854703), non-coding RNA.			-266
chr6	48627690	48627990	hit	0.024	0.846	10.2	83.9	9	101.15	14.5	25	2169	hit	AI854703	NR_027236		Mus musculus expressed sequence AI854703 (AI854703), non-coding RNA.			-176
chr14	50925420	50925720	hit	0.06	0.778	21.3	83.8	3	66.9	11.9	8	4812	hit	Apex1	NM_009687	NP_033817	Mus musculus apurinic/apyrimidinic endonuclease 1 (Apex1), mRNA.			471
chr2	112261860	112262160	hit	0.054	0.75	20.95	83.7	7	72	26.75	18.8	15899	hit	Nop10	NM_025403	NP_079679	Mus musculus NOP10 ribonucleoprotein (Nop10), mRNA.			0
chr16	38294600	38294900	hit	0.014	0.746	9.25	83.55	2	75.55	15.55	11.4	419	hit	Nr1i2	NM_001098404;NM_010936	NP_001091874;NP_035066	Mus musculus nuclear receptor subfamily 1, group I, member 2 (Nr1i2), transcript variant 1, mRNA.;Mus musculus nuclear receptor subfamily 1, group I, member 2 (Nr1i2), transcript variant 2, mRNA.			0
chr11	121685890	121686190	hit	0.018	0.77	9	83.4	3	62.35	7.85	11.8	757	hit	B3gntl1	NM_178664	NP_848779	Mus musculus UDP-GlcNAc:betaGal beta-1,3-N-acetylglucosaminyltransferase-like 1 (B3gntl1), mRNA.			-12739
chr11	73330110	73330410	hit	0.034	0.838	20.6	83.35	11.3	82.4	16.85	10.45	316	hit	Spata22	NM_001045531	NP_001038996	Mus musculus spermatogenesis associated 22 (Spata22), mRNA.			369
chr1	77495690	77495990	hit	0.022	0.636	4.6	83.25	4.9	46.3	14.25	24	1680	hit	Mir6352	NR_105770		Mus musculus microRNA 6352 (Mir6352), microRNA.			777
chr8	61593550	61593850	hit	0.03	0.744	11	83.2	6	40	8.95	17.2	655	hit	Palld	NM_001293774	NP_001280703	Mus musculus palladin, cytoskeletal associated protein (Palld), transcript variant 3, mRNA.			-2381
chr10	112464700	112465000	hit	0.026	0.618	7	83.2	3.55	66.1	4	8.3	230	hit	Kcnc2			Mus musculus potassium voltage gated channel, Shaw-related subfamily, member 2 (Kcnc2), mRNA.			9092
chr15	7173190	7173490	hit	0.018	0.634	9.25	83.2	12.75	109.85	14.6	18.25	413	hit	Lifr	NM_001113386;NM_013584	;NP_038612	Mus musculus leukemia inhibitory factor receptor (Lifr), transcript variant 1, mRNA.			32648
chr13	112469040	112469340	hit	0.018	0.634	9.6	83.15	5	39.1	0.85	9	293	hit	Il6st	;NM_010560	;NP_034690	Mus musculus interleukin 6 signal transducer (Il6st), mRNA.			4970
chr8	106290990	106291290	hit	0.016	0.772	20	82.9	6.8	53.65	16.45	17.25	506	hit	4930506A18Rik	NR_126090;NR_126091		Mus musculus RIKEN cDNA 4930506A18 gene (4930506A18Rik), transcript variant 1, long non-coding RNA.;Mus musculus RIKEN cDNA 4930506A18 gene (4930506A18Rik), transcript variant 2, long non-coding RNA.			8761
chr16	90533600	90533900	hit	0.026	0.774	6.7	82.8	4.75	69.2	10.1	14.4	1026	hit	AK033811			Mus musculus adult male epididymis cDNA, RIKEN full-length enriched library, clone:9230112I12 product:unclassifiable, full insert sequence.			92945
chr10	25427710	25428010	hit	0.032	0.76	11	82.75	4.55	51.8	12.9	10.65	5514	hit	Epb4.1l2	NM_013511	NP_038539	Mus musculus erythrocyte protein band 4.1-like 2 (Epb4.1l2), transcript variant 2, mRNA.			-13562
chr5	118373740	118374040	hit	0.048	0.788	10	82.75	6	80.85	13	8.3	6495	hit	2410131K14Rik	NM_001081236	NP_001074705	Mus musculus RIKEN cDNA 2410131K14 gene (2410131K14Rik), mRNA.			128513
chr2	112261790	112262090	hit	0.048	0.728	24.45	82.7	7	77.95	38.35	20.6	15782	hit	Nop10	NM_025403	NP_079679	Mus musculus NOP10 ribonucleoprotein (Nop10), mRNA.			0
chr8	78509440	78509740	hit	0.116	0.95	18.65	82.35	8.85	96.55	20.4	24.5	15083	hit	Slc10a7	NM_001009981;NM_001282108;NM_001282109;NM_029736;NR_104094	;NP_001009981;NP_001269037;NP_001269038;NP_084012	Mus musculus solute carrier family 10 (sodium/bile acid cotransporter family), member 7 (Slc10a7), transcript variant a, mRNA.;Mus musculus solute carrier family 10 (sodium/bile acid cotransporter family), member 7 (Slc10a7), transcript variant b, non-coding RNA.;Mus musculus solute carrier family 10 (sodium/bile acid cotransporter family), member 7 (Slc10a7), transcript variant c, mRNA.;Mus musc…			112
chr7	45182350	45182650	hit	0.094	0.938	24.5	82.3	9.9	82.85	28.95	19.9	27862	hit	Pth2	NM_053256	NP_444486	Mus musculus parathyroid hormone 2 (Pth2), mRNA.			1168
chr15	36505480	36505780	hit	0.022	0.722	21.7	81.9	12	71.5	35.15	31	3602	hit	Ankrd46	NM_175134	NP_780343	Mus musculus ankyrin repeat domain 46 (Ankrd46), mRNA.			-8689
chr6	34708170	34708470	hit	0.014	0.696	3.7	81.85	7.15	134.9	13.75	14.6	1069	hit	Cald1	NM_145575	NP_663550	Mus musculus caldesmon 1 (Cald1), mRNA.			-973
chr11	120190030	120190330	hit	0.09	0.952	27.1	81.75	11.45	78.55	36.6	35.25	44126	hit	2810410L24Rik	NR_030682		Mus musculus RIKEN cDNA 2810410L24 gene (2810410L24Rik), long non-coding RNA.			-174
chr8	84986130	84986430	hit	0.096	0.906	10.85	81.65	6.6	45.4	29.2	20.4	10299	hit	Hook2	;NM_001167991;NM_133255	;NP_001161463;NP_573518	Mus musculus hook homolog 2 (Drosophila) (Hook2), transcript variant 1, mRNA.;Mus musculus hook homolog 2 (Drosophila) (Hook2), transcript variant 2, mRNA.			-4164
chr9	73068000	73068300	hit	0.034	0.822	13.9	81.65	5	37.9	17.9	21.15	3159	hit	Rab27a	NM_001301232	NP_001288161	Mus musculus RAB27A, member RAS oncogene family (Rab27a), transcript variant 3, mRNA.			3852
chrX	49797720	49798020	hit	0.05	0.868	7.25	81.55	6	91.1	17	22.25	14337	hit	Igsf1	NM_177591;NM_177915	NP_808583;NP_899179	Mus musculus immunoglobulin superfamily, member 1 (Igsf1), transcript variant 1, mRNA.;Mus musculus immunoglobulin superfamily, member 1 (Igsf1), transcript variant 2, mRNA.			0
chr1	182281240	182281540	hit	0.022	0.756	9.2	81.4	4.3	52.1	18.1	29.9	4678	hit	Degs1	NM_007853	NP_031879	Mus musculus degenerative spermatocyte homolog 1 (Drosophila) (Degs1), mRNA.			1218
chr1	86065160	86065460	hit	0.052	0.824	17	81.2	5	84.9	15.7	19.2	2678	hit	Psmd1	NM_027357	NP_081633	Mus musculus proteasome (prosome, macropain) 26S subunit, non-ATPase, 1 (Psmd1), mRNA.			541
chr10	112465340	112465640	hit	0.046	0.68	4.9	81.05	7	57.9	16.4	3	285	hit	Kcnc2			Mus musculus potassium voltage gated channel, Shaw-related subfamily, member 2 (Kcnc2), mRNA.			9732
chr17	74942740	74943040	hit	0.028	0.676	13.9	80.8	7	64.85	9.3	11.25	241	hit	Ltbp1	NM_019919	NP_064303	Mus musculus latent transforming growth factor beta binding protein 1 (Ltbp1), transcript variant 1, mRNA.			-62488
chr16	38294550	38294850	hit	0.012	0.76	11.95	80.75	3	66.85	14.05	9.35	458	hit	Nr1i2	NM_001098404;NM_010936	NP_001091874;NP_035066	Mus musculus nuclear receptor subfamily 1, group I, member 2 (Nr1i2), transcript variant 1, mRNA.;Mus musculus nuclear receptor subfamily 1, group I, member 2 (Nr1i2), transcript variant 2, mRNA.			0
chr6	97216210	97216510	hit	0.012	0.652	5	80.5	6.05	102.45	19.9	14.15	378	hit	Arl6ip5	NM_022992	NP_075368	Mus musculus ADP-ribosylation factor-like 6 interacting protein 5 (Arl6ip5), mRNA.			5418
chr3	97229080	97229380	hit	0.014	0.65	12.6	80.35	9	57.5	23.6	10.05	449	hit	Bcl9	NM_029933	NP_084209	Mus musculus B cell CLL/lymphoma 9 (Bcl9), mRNA.			-1716
chr6	28202280	28202580	hit	0.06	0.802	4.9	80.35	5.6	111	18.35	18.65	607	hit	Zfp800	NM_001081678	NP_001075147	Mus musculus zinc finger protein 800 (Zfp800), mRNA.			59020
chr16	94126290	94126590	hit	0.04	0.764	7.3	80.3	9.95	70.3	4	9.7	957	hit	Sim2			Mus musculus single-minded homolog 2 (Drosophila) (Sim2), mRNA.			3687
chr16	77040460	77040760	hit	0.012	0.608	7.15	80.05	5	52.35	12.65	4	258	hit	Usp25	NM_013918	NP_038946	Mus musculus ubiquitin specific peptidase 25 (Usp25), mRNA.			26391
chr5	92808250	92808550	hit	0.028	0.698	17.6	80	7	56.9	14.25	15.95	2337	hit	Shroom3	NM_001077595	NP_001071064	Mus musculus shroom family member 3 (Shroom3), transcript variant 2, mRNA.			-831
chr6	120579660	120579960	hit	0.046	0.842	24.75	80	5.2	67.8	20.85	18.4	5692	hit	1700072O05Rik	NR_045733		Mus musculus RIKEN cDNA 1700072O05 gene (1700072O05Rik), long non-coding RNA.			24864
chr8	79073140	79073440	hit	0.028	0.608	5	79.95	7.25	43.4	8.5	8.65	147	hit	Zfp827	NM_001294279;NM_178267	NP_001281208;NP_839998	Mus musculus zinc finger protein 827 (Zfp827), transcript variant 1, mRNA.;Mus musculus zinc finger protein 827 (Zfp827), transcript variant 2, mRNA.			44703
chr16	38294390	38294690	hit	0.018	0.798	11.85	79.9	4	50.25	11.5	8.85	448	hit	Nr1i2	NM_001098404;NM_010936	NP_001091874;NP_035066	Mus musculus nuclear receptor subfamily 1, group I, member 2 (Nr1i2), transcript variant 1, mRNA.;Mus musculus nuclear receptor subfamily 1, group I, member 2 (Nr1i2), transcript variant 2, mRNA.			133
chr19	23165180	23165480	hit	0.026	0.682	12.3	79.9	5	45.2	14.35	23.3	351	hit	Mir1192	NR_035423		Mus musculus microRNA 1192 (Mir1192), microRNA.			15749
chr16	32717820	32718120	hit	0.036	0.668	12.4	79.8	4	44.7	13.3	5.75	415	hit	Muc4	NM_080457	NP_536705	Mus musculus mucin 4 (Muc4), mRNA.			-17765
chr4	99121420	99121720	hit	0.024	0.69	9	79.8	3	70.75	14.2	6	1702	hit	Dock7	NM_001290636;NM_026082	NP_001277565;NP_080358	Mus musculus dedicator of cytokinesis 7 (Dock7), transcript variant 1, mRNA.;Mus musculus dedicator of cytokinesis 7 (Dock7), transcript variant 2, mRNA.			-505
chr13	111508680	111508980	hit	0.02	0.664	17.35	79.7	4	46.15	9.15	6.3	383	hit	Gpbp1	NM_001122963;NM_028487	NP_001116435;NP_082763	Mus musculus GC-rich promoter binding protein 1 (Gpbp1), transcript variant 1, mRNA.;Mus musculus GC-rich promoter binding protein 1 (Gpbp1), transcript variant 2, mRNA.			-18639
chr7	18963420	18963720	hit	0.048	0.874	13.45	79.15	9.45	92.85	26.15	13.65	4788	hit	Nanos2	NM_194064	NP_918953	Mus musculus nanos homolog 2 (Drosophila) (Nanos2), mRNA.			-23803
chr4	138697280	138697580	hit	0.024	0.736	22.6	79.15	6	52.3	6	13	1538	hit	Ubxn10	NM_178671	NP_848786	Mus musculus UBX domain protein 10 (Ubxn10), transcript variant 2, mRNA.			23782
chr11	35421170	35421470	hit	0.006	0.73	8.1	79.15	7.65	55.3	13.05	9	427	hit	AK136017			Mus musculus in vitro fertilized eggs cDNA, RIKEN full-length enriched library, clone:7420447L16 product:unclassifiable, full insert sequence.			71101
chr7	100491780	100492080	hit	0.016	0.658	10.2	79.1	10.55	68.85	19.2	17.3	757	hit	Ucp2	NM_011671	NP_035801	Mus musculus uncoupling protein 2 (mitochondrial, proton carrier) (Ucp2), mRNA.			-1277
chr6	28202150	28202450	hit	0.036	0.732	4	79.05	4.15	121.6	29.7	17	574	hit	Zfp800	NM_001081678	NP_001075147	Mus musculus zinc finger protein 800 (Zfp800), mRNA.			59150
chr7	144943100	144943400	hit	0.12	1.002	8	79.05	5	122	14.8	16.7	19035	hit	Ccnd1	NM_007631	NP_031657	Mus musculus cyclin D1 (Ccnd1), mRNA.			-3175
chr8	60983510	60983810	hit	0.11	0.89	17.55	79.05	7.9	64.25	19.05	16.35	25997	hit	Clcn3	;NM_007711;NM_173873;NM_173874	;NP_031737;NP_776299	Mus musculus chloride channel 3 (Clcn3), transcript variant a, mRNA.;Mus musculus chloride channel 3 (Clcn3), transcript variant b, mRNA.;Mus musculus chloride channel 3 (Clcn3), transcript variant e, mRNA.			-199
chr18	25089100	25089400	hit	0.01	0.78	11.1	79.05	7.75	56.5	6.1	16.05	727	hit	Fhod3			Mus musculus formin homology 2 domain containing 3 (Fhod3), transcript variant 2, mRNA.			22883
chr12	69525560	69525860	hit	0.018	0.694	7	79	3	70.1	13.55	7	456	hit	5830428M24Rik	NR_038060;NR_038061		Mus musculus RIKEN cDNA 5830428M24 gene (5830428M24Rik), transcript variant 1, long non-coding RNA.			-50010
chr5	116429080	116429380	hit	0.03	0.808	11.55	78.7	3.55	84.2	14.2	11	774	hit	Hspb8	NM_030704	NP_109629	Mus musculus heat shock protein 8 (Hspb8), mRNA.			-6216
chr2	168762540	168762840	hit	0.032	0.71	16.6	78.65	8	47.25	24	11.9	11751	hit	AK052878			Mus musculus 16 days neonate heart cDNA, RIKEN full-length enriched library, clone:D830018J03 product:unclassifiable, full insert sequence.			-3302
chr10	12610070	12610370	hit	0.024	0.672	23.9	78.55	5	128.3	21.2	20.6	629	hit	Utrn			Mus musculus utrophin (Utrn), mRNA.			4520
chr14	101517620	101517920	hit	0.022	0.578	7.1	78.5	4	49.4	10	9.2	857	hit	Tbc1d4			Mus musculus TBC1 domain family, member 4 (Tbc1d4), mRNA.			-16504
chr2	60141840	60142140	hit	0.014	0.692	6.1	78.4	6.3	61.6	20.1	16	639	hit	Baz2b	;NM_001001182	;NP_001001182	Mus musculus bromodomain adjacent to zinc finger domain, 2B (Baz2b), mRNA.			-16030
chr10	115571260	115571560	hit	0.024	0.61	2	78.3	5	63.2	9.75	8	1426	hit	A930009A15Rik	NM_029982	NP_084258	Mus musculus RIKEN cDNA A930009A15 gene (A930009A15Rik), mRNA.			1274
chr2	158557820	158558120	hit	0.02	0.642	9.95	78.15	5.85	62.75	8.95	6.2	269	hit	Arhgap40	NM_001145015	NP_001138487	Mus musculus Rho GTPase activating protein 40 (Arhgap40), mRNA.			45024
chr11	22972440	22972740	hit	0.116	0.898	9.4	78.1	8.35	89.3	21.65	19.9	5719	hit	Zrsr1	NM_011663	NP_035793	Mus musculus zinc finger (CCCH type), RNA binding motif and serine/arginine rich 1 (Zrsr1), mRNA.			435
chr6	127250860	127251160	hit	0.022	0.794	6.3	78	7	41.4	18	11	2073	hit	D130058E03	NR_073373		Mus musculus uncharacterized D130058E03 (D130058E03), long non-coding RNA.			56806
chr6	120579040	120579340	hit	0.034	0.84	21.2	77.85	6.4	78.3	22.4	18.05	5456	hit	1700072O05Rik	NR_045733		Mus musculus RIKEN cDNA 1700072O05 gene (1700072O05Rik), long non-coding RNA.			24244
chr5	118373880	118374180	hit	0.036	0.808	8	77.8	3.75	75.2	18.95	12.05	4239	hit	2410131K14Rik	NM_001081236	NP_001074705	Mus musculus RIKEN cDNA 2410131K14 gene (2410131K14Rik), mRNA.			128653
chr6	100704060	100704360	hit	0.026	0.698	2	77.8	8.35	102.6	6.75	11	1225	hit	Gxylt2	NM_198612	NP_941014	Mus musculus glucoside xylosyltransferase 2 (Gxylt2), mRNA.			-373
chr6	48627640	48627940	hit	0.024	0.844	8.4	77.7	9.6	99.1	12.95	24.25	2579	hit	AI854703	NR_027236		Mus musculus expressed sequence AI854703 (AI854703), non-coding RNA.			-226
chr8	106289200	106289500	hit	0.01	0.762	19	77.55	7	71.1	12.85	14.15	1647	hit	4930506A18Rik	NR_126090;NR_126091		Mus musculus RIKEN cDNA 4930506A18 gene (4930506A18Rik), transcript variant 1, long non-coding RNA.;Mus musculus RIKEN cDNA 4930506A18 gene (4930506A18Rik), transcript variant 2, long non-coding RNA.			6971
chr9	107698560	107698860	hit	0.042	0.85	6.75	77.55	6.9	57.45	10	5	10067	hit	Sema3f	NM_011349	NP_035479	Mus musculus sema domain, immunoglobulin domain (Ig), short basic domain, secreted, (semaphorin) 3F (Sema3f), mRNA.			6730
chr7	139576080	139576380	hit	0.042	0.824	4.45	77.5	4.35	53.25	11.05	13.35	1026	hit	Nkx6-2	NM_183248		Mus musculus NK6 homeobox 2 (Nkx6-2), transcript variant 2, non-coding RNA.			6416
chr5	103424580	103424880	hit	0.08	0.86	11	77.5	2.65	66.9	12.85	14.1	13893	hit	Ptpn13	;NM_011204	;NP_035334	Mus musculus protein tyrosine phosphatase, non-receptor type 13 (Ptpn13), mRNA.			-311
chr7	80774260	80774560	hit	0.034	0.756	13.05	77.25	3.3	58.65	12.2	8	558	hit	AK006397			Mus musculus adult male testis cDNA, RIKEN full-length enriched library, clone:1700026N08 product:IQ motif containing GTPase activating protein 1, full insert sequence.			22438
chr11	97115460	97115760	hit	0.078	0.924	13.5	77.25	4.55	64.8	21.75	16.1	5574	hit	Tbx21	NM_019507	NP_062380	Mus musculus T-box 21 (Tbx21), mRNA.			-129
chr12	76177600	76177900	hit	0.056	0.74	16	77.15	4	62.5	19.85	22.35	6522	hit	Esr2	NM_010157;NM_207707;NR_104386	;NP_034287;NP_997590	Mus musculus estrogen receptor 2 (beta) (Esr2), transcript variant 1, mRNA.;Mus musculus estrogen receptor 2 (beta) (Esr2), transcript variant 2, mRNA.;Mus musculus estrogen receptor 2 (beta) (Esr2), transcript variant 3, non-coding RNA.			-341
chr9	62763750	62764050	hit	0.05	0.876	16.2	77	8	51.55	12.05	10.05	3984	hit	Fem1b	NM_010193	NP_034323	Mus musculus feminization 1 homolog b (C. elegans) (Fem1b), mRNA.			47597
chr14	50925580	50925880	hit	0.044	0.748	15.25	76.95	3	66.8	9.3	9	3403	hit	Apex1	NM_009687	NP_033817	Mus musculus apurinic/apyrimidinic endonuclease 1 (Apex1), mRNA.			631
chr12	4354310	4354610	hit	0.014	0.544	11	76.8	12	89.7	32.65	28	310	hit	Ncoa1	NM_010881	NP_035011	Mus musculus nuclear receptor coactivator 1 (Ncoa1), mRNA.			0
chr2	75956660	75956960	hit	0.024	0.704	9.55	76.75	6	41.35	19.4	17.3	462	hit	Ttc30b	NM_028235	NP_082511	Mus musculus tetratricopeptide repeat domain 30B (Ttc30b), mRNA.			-18198
chr12	111486780	111487080	hit	0.028	0.736	2	76.75	5	45	15	10	1252	hit	Gm266	NM_001033248	NP_001028420	Mus musculus predicted gene 266 (Gm266), mRNA.			-957
chr16	48580360	48580660	hit	0.03	0.706	7.15	76.6	3	70.85	12	12.15	0	hit	Morc1			Mus musculus microrchidia 1 (Morc1), mRNA.			-31043
chr8	70766090	70766390	hit	0.07	0.896	27.15	76.5	6	64.65	19.9	26.2	7925	hit	Ifi30	NM_023065	NP_075552	Mus musculus interferon gamma inducible protein 30 (Ifi30), mRNA.			272
chr7	19664370	19664670	hit	0.09	0.948	13.6	76.35	7.15	61.05	17	21.45	8072	hit	Clptm1	;NM_019649	;NP_062623	Mus musculus cleft lip and palate associated transmembrane protein 1 (Clptm1), mRNA.			359
chr14	50925060	50925360	hit	0.11	0.898	5.65	76.3	2.25	71.7	17.45	20.5	15110	hit	Apex1	NM_009687	NP_033817	Mus musculus apurinic/apyrimidinic endonuclease 1 (Apex1), mRNA.			111
chr15	102980960	102981260	hit	0.052	0.822	10.75	76.25	5.3	70.4	10.85	15.4	4507	hit	Hoxc9	NM_008272	NP_032298	Mus musculus homeobox C9 (Hoxc9), mRNA.			3928
chr17	62887800	62888100	hit	0.012	0.564	4.85	76.2	4	43	15	16.3	209	hit	Efna5	NM_010109;NM_207654	NP_034239;NP_997537	Mus musculus ephrin A5 (Efna5), transcript variant 1, mRNA.;Mus musculus ephrin A5 (Efna5), transcript variant 2, mRNA.			-6483
chr14	66636040	66636340	hit	0.074	0.884	6	76.05	7.45	75.8	24.05	14.15	4098	hit	Adra1a	NM_001271759;NM_001271760;NM_001271761;NM_013461	NP_001258688;NP_001258690;NP_038489	Mus musculus adrenergic receptor, alpha 1a (Adra1a), transcript variant 1, mRNA.;Mus musculus adrenergic receptor, alpha 1a (Adra1a), transcript variant 2, mRNA.;Mus musculus adrenergic receptor, alpha 1a (Adra1a), transcript variant 3, mRNA.;Mus musculus adrenergic receptor, alpha 1a (Adra1a), transcript variant 4, mRNA.			789
chr7	18963460	18963760	hit	0.052	0.884	13.15	75.9	12.15	87.85	28.8	15.95	4586	hit	Nanos2	NM_194064	NP_918953	Mus musculus nanos homolog 2 (Drosophila) (Nanos2), mRNA.			-23763
chr2	91976340	91976640	hit	0.056	0.908	24.95	75.9	8.7	74.6	19	19.2	7153	hit	Dgkz	NM_138306	NP_612179	Mus musculus diacylglycerol kinase zeta (Dgkz), transcript variant 2, mRNA.			-10740
chr2	91976380	91976680	hit	0.054	0.894	25.3	75.75	7	66.75	13.45	18.9	6672	hit	Dgkz	NM_138306	NP_612179	Mus musculus diacylglycerol kinase zeta (Dgkz), transcript variant 2, mRNA.			-10780
chr7	19664420	19664720	hit	0.096	0.958	12.3	75.45	8	60	15.75	18.5	9674	hit	Clptm1	;NM_019649	;NP_062623	Mus musculus cleft lip and palate associated transmembrane protein 1 (Clptm1), mRNA.			309
chr6	99098460	99098760	hit	0.008	0.686	8	75.15	3	149.75	18.4	13	725	hit	Foxp1	NM_001197322;NM_053202	NP_001184251;NP_444432	Mus musculus forkhead box P1 (Foxp1), transcript variant 1, mRNA.			64268
chr16	90533640	90533940	hit	0.026	0.776	6	75	4	69.35	9	13.95	963	hit	AK033811			Mus musculus adult male epididymis cDNA, RIKEN full-length enriched library, clone:9230112I12 product:unclassifiable, full insert sequence.			92985
chr5	35054440	35054740	hit	0.018	0.842	11.15	74.95	8	60.85	16.15	9.85	762	hit	Dok7	NM_172708	NP_766296	Mus musculus docking protein 7 (Dok7), mRNA.			-2072
chr1	135818120	135818420	hit	0.062	0.854	7.55	74.9	6.35	62.85	17.55	18.85	2806	hit	Lad1	NM_133664	NP_598425	Mus musculus ladinin (Lad1), mRNA.			-177
chr7	49764100	49764400	hit	0.024	0.714	12.65	74.45	7	65.15	24.2	22.05	1043	hit	Htatip2	NM_001146052	NP_001139525	Mus musculus HIV-1 tat interactive protein 2, homolog (human) (Htatip2), transcript variant 4, mRNA.			4588
chr14	33370150	33370450	hit	0.022	0.84	25.85	74.3	7	70.5	11	5.3	10262	hit	Mapk8	NM_016700	NP_057909	Mus musculus mitogen-activated protein kinase 8 (Mapk8), mRNA.			40573
chr11	62648710	62649010	hit	0.144	1.044	24.05	74.25	6.1	72.1	42.3	41.2	36706	hit	Mmgt2			Mus musculus membrane magnesium transporter 2 (Mmgt2), mRNA.			30
chr11	120949180	120949480	hit	0.134	1.028	13.4	74.2	4	66	19.3	15.75	14904	hit	Slc16a3	NM_001038653;NM_001038654	NP_109621	Mus musculus solute carrier family 16 (monocarboxylic acid transporters), member 3 (Slc16a3), mRNA.			113
chr2	6420920	6421220	hit	0.028	0.572	3.9	74.1	5.85	52.3	7.75	7.7	144	hit	AK131873			Mus musculus adult male small intestine cDNA, RIKEN full-length enriched library, clone:2010309M24 product:unclassifiable, full insert sequence.			-50773
chrX	77509240	77509540	hit	0.04	0.726	9.95	74.05	1.35	101.9	36.95	19.7	11488	hit	Tbl1x	NM_020601	NP_065626	Mus musculus transducin (beta)-like 1 X-linked (Tbl1x), mRNA.			-1686
chr4	101263580	101263880	hit	0.004	0.554	6.7	74.05	4.95	39.4	6	11	416	hit	Jak1	NM_146145	NP_666257	Mus musculus Janus kinase 1 (Jak1), mRNA.			1401
chr17	56831210	56831510	hit	0.132	0.976	26.45	73.95	8.2	66.05	26.85	31.55	51860	hit	Rfx2	;NM_009056;NM_027787	;NP_033082;NP_082063	Mus musculus regulatory factor X, 2 (influences HLA class II expression) (Rfx2), transcript variant 1, mRNA.;Mus musculus regulatory factor X, 2 (influences HLA class II expression) (Rfx2), transcript variant 2, mRNA.			-202
chr7	45182300	45182600	hit	0.096	0.93	26	73.95	12	79.2	26.85	24.25	26971	hit	Pth2	NM_053256	NP_444486	Mus musculus parathyroid hormone 2 (Pth2), mRNA.			1118
chr3	108388910	108389210	hit	0.022	0.786	12	73.9	5.5	69.85	15	13.95	5962	hit	Psrc1	NM_019976	NP_064360	Mus musculus proline/serine-rich coiled-coil 1 (Psrc1), transcript variant 2, mRNA.			5072
chr17	17373840	17374140	hit	0.064	0.756	20	73.75	7.4	67.35	18.55	10	22314	hit	Riok2	NM_025934	NP_080210	Mus musculus RIO kinase 2 (yeast) (Riok2), mRNA.			-191
chr1	65185380	65185680	hit	0.026	0.686	18.65	73.7	9.65	57.05	13.8	22.1	1764	hit	Idh1	NM_001111320	NP_034627	Mus musculus isocitrate dehydrogenase 1 (NADP+), soluble (Idh1), transcript variant 1, mRNA.			798
chr6	126229460	126229760	hit	0.006	0.572	7	73.45	5.4	51.1	15.15	4.85	66	hit	Ntf3	NM_001164034;NM_008742	NP_032768	Mus musculus neurotrophin 3 (Ntf3), transcript variant 1, mRNA.;Mus musculus neurotrophin 3 (Ntf3), transcript variant 3, mRNA.			-62716
chr4	99121480	99121780	hit	0.026	0.678	11.85	73.4	4.1	63.5	14	4.4	1526	hit	Dock7	NM_001290636;NM_026082	NP_001277565;NP_080358	Mus musculus dedicator of cytokinesis 7 (Dock7), transcript variant 1, mRNA.;Mus musculus dedicator of cytokinesis 7 (Dock7), transcript variant 2, mRNA.			-565
chr8	117359140	117359440	hit	0.014	0.78	6.35	73.4	3	82.85	10	9	513	hit	Cmip	NM_028941	NP_083217	Mus musculus c-Maf inducing protein (Cmip), transcript variant 2, mRNA.			9970
chr2	119145850	119146150	hit	0.016	0.726	12	73.3	5.3	36.3	5.75	8	406	hit	Rmdn3	NM_001033136	NP_001028308	Mus musculus regulator of microtubule dynamics 3 (Rmdn3), mRNA.			10883
chr5	127235120	127235420	hit	0.038	0.8	19	72.9	4.35	48.85	24.25	15.35	9475	hit	Tmem132c	NM_175432	NP_780641	Mus musculus transmembrane protein 132C (Tmem132c), mRNA.			-6405
chr6	29132660	29132960	hit	0.03	0.676	3	72.85	6.65	38.85	15.15	19.8	326	hit	Rbm28			Mus musculus RNA binding motif protein 28 (Rbm28), mRNA.			22130
chr6	126229500	126229800	hit	0.006	0.578	7	72.7	6.2	51.7	11.7	3.1	70	hit	Ntf3	NM_001164034;NM_008742	NP_032768	Mus musculus neurotrophin 3 (Ntf3), transcript variant 1, mRNA.;Mus musculus neurotrophin 3 (Ntf3), transcript variant 3, mRNA.			-62756
chr11	91310850	91311150	hit	0.02	0.622	6	72.25	4	46.05	14.6	13.3	245	hit	Kif2b	NM_028547	NP_082823	Mus musculus kinesin family member 2B (Kif2b), mRNA.			266404
chr10	96832360	96832660	hit	0.018	0.558	1.6	72.25	4	49.1	5.7	5	157	hit	4930556N09Rik	NR_045358		Mus musculus RIKEN cDNA 4930556N09 gene (4930556N09Rik), long non-coding RNA.			-203107
chr10	25427770	25428070	hit	0.028	0.778	12.5	72.15	5.5	45.25	12.85	11.2	4603	hit	Epb4.1l2	NM_013511	NP_038539	Mus musculus erythrocyte protein band 4.1-like 2 (Epb4.1l2), transcript variant 2, mRNA.			-13502
chr7	49764020	49764320	hit	0.024	0.704	9.85	72.1	4.9	67.85	24.15	26.05	1062	hit	Htatip2	NM_001146052	NP_001139525	Mus musculus HIV-1 tat interactive protein 2, homolog (human) (Htatip2), transcript variant 4, mRNA.			4508
chr5	127708220	127708520	hit	0.028	0.818	10	72	4.85	80.7	22	18	1278	hit	Glt1d1	NM_177005	NP_795979	Mus musculus glycosyltransferase 1 domain containing 1 (Glt1d1), mRNA.			75958
chr13	66247760	66248060	hit	0.08	0.908	17.65	72	11.6	93.25	23	21	117	hit	AK021218			Mus musculus ES cells cDNA, RIKEN full-length enriched library, clone:C330022B21 product:weakly similar to KRUPPEL-RELATED ZINC FINGER PROTEIN F80-L [Mus musculus], full insert sequence.			101217
chr8	31150190	31150490	hit	0.068	0.718	17.9	71.95	9.25	82.15	25.55	23	20719	hit	Tti2	NM_001199988;NM_144927	NP_001186917;NP_659176	Mus musculus TELO2 interacting protein 2 (Tti2), transcript variant 1, non-coding RNA.;Mus musculus TELO2 interacting protein 2 (Tti2), transcript variant 2, mRNA.;Mus musculus TELO2 interacting protein 2 (Tti2), transcript variant 3, mRNA.			0
chr4	32304560	32304860	hit	0.034	0.688	11.35	71.85	7.5	62.45	2	10.8	833	hit	Bach2	NM_001109661	NP_001103131	Mus musculus BTB and CNC homology 2 (Bach2), mRNA.			65610
chr5	100820370	100820670	hit	0.106	0.854	13.3	71.75	5.9	59.95	22.2	21.5	10294	hit	Fam175a	;NM_172405	;NP_765993	Mus musculus family with sequence similarity 175, member A (Fam175a), mRNA.			264
chr6	28202380	28202680	hit	0.048	0.802	5.95	71.6	8.7	101.7	11.2	20.3	746	hit	Zfp800	NM_001081678	NP_001075147	Mus musculus zinc finger protein 800 (Zfp800), mRNA.			58920
chr15	7172810	7173110	hit	0.008	0.654	5.65	71.6	5	126	15.85	21	473	hit	Lifr	NM_001113386;NM_013584	;NP_038612	Mus musculus leukemia inhibitory factor receptor (Lifr), transcript variant 1, mRNA.			32268
chr4	40221400	40221700	hit	0.032	0.78	11.05	71.5	7	49.05	14.4	20.7	2397	hit	Ddx58	NM_172689	NP_766277	Mus musculus DEAD (Asp-Glu-Ala-Asp) box polypeptide 58 (Ddx58), mRNA.			-800
chr2	77519120	77519420	hit	0.04	0.718	5	71.4	5	38.45	13.5	9.7	2697	hit	Zfp385b	NM_001113400	NP_001106871	Mus musculus zinc finger protein 385B (Zfp385b), transcript variant 3, mRNA.			245
chr11	75001030	75001330	hit	0.022	0.72	9.8	71.35	2.95	58.75	21.3	21.95	782	hit	Mir684-1	NR_030454		Mus musculus microRNA 684-1 (Mir684-1), microRNA.			64660
chr9	107698200	107698500	hit	0.03	0.818	6.2	71.1	3	67.3	12.1	9.4	6098	hit	Sema3f	NM_011349	NP_035479	Mus musculus sema domain, immunoglobulin domain (Ig), short basic domain, secreted, (semaphorin) 3F (Sema3f), mRNA.			7090
chr8	43305770	43306070	hit	0.044	0.748	6.7	71.05	9	100.2	31.25	38.95	644	hit	Zfp42	NM_009556	NP_033582	Mus musculus zinc finger protein 42 (Zfp42), mRNA.			938
chr4	102318420	102318720	hit	0.034	0.708	5	71.05	8	57.3	9.25	6	365	hit	Pde4b	NM_001177983;NM_019840	NP_001171453;NP_001171454	Mus musculus phosphodiesterase 4B, cAMP specific (Pde4b), transcript variant 1, mRNA.;Mus musculus phosphodiesterase 4B, cAMP specific (Pde4b), transcript variant 5, mRNA.			63678
chr2	25180860	25181160	hit	0.176	1.046	8	71	5	56.15	9	12.8	17120	hit	Nrarp	NM_025980	NP_080256	Mus musculus Notch-regulated ankyrin repeat protein (Nrarp), mRNA.			102
chr6	97216400	97216700	hit	0.014	0.658	3.3	70.8	4	91.45	15.05	17.15	408	hit	Arl6ip5	NM_022992	NP_075368	Mus musculus ADP-ribosylation factor-like 6 interacting protein 5 (Arl6ip5), mRNA.			5608
chr5	35054400	35054700	hit	0.022	0.838	12.7	70.7	8	69.15	15.25	10.25	734	hit	Dok7	NM_172708	NP_766296	Mus musculus docking protein 7 (Dok7), mRNA.			-2112
chr3	21935480	21935780	hit	0.032	0.71	15.55	70.55	7.55	73.6	16	24.6	10408	hit	AK080657			Mus musculus 10 days neonate cortex cDNA, RIKEN full-length enriched library, clone:A830043K18 product:unclassifiable, full insert sequence.			-134707
chr12	4354550	4354850	hit	0.014	0.526	11.3	70.45	4.7	65.8	14.85	11.55	183	hit	Ncoa1	NM_010881	NP_035011	Mus musculus nuclear receptor coactivator 1 (Ncoa1), mRNA.			-41
chr17	17373740	17374040	hit	0.056	0.758	18.75	70.25	4.55	72.95	21.1	7.25	12258	hit	Riok2	NM_025934	NP_080210	Mus musculus RIO kinase 2 (yeast) (Riok2), mRNA.			-291
chr13	38344950	38345250	hit	0.112	0.898	14.15	70.2	6	50.4	29	28.05	23178	hit	Bmp6	NM_007556	NP_031582	Mus musculus bone morphogenetic protein 6 (Bmp6), mRNA.			-465
chr11	77928200	77928500	hit	0.018	0.748	11.8	70.15	3.45	51.1	8.85	6	409	hit	Gm11190	NR_033549		Mus musculus predicted gene 11190 (Gm11190), long non-coding RNA.			787
chr4	116996110	116996410	hit	0.046	0.858	15.7	69.9	3	80.5	11.55	15.95	6014	hit	Hectd3	NM_175244	NP_780453	Mus musculus HECT domain containing 3 (Hectd3), mRNA.			762
chr12	106231760	106232060	hit	0.026	0.808	8.95	69.55	3.25	80.65	15.1	4.65	1075	hit	1700121N20Rik	NR_036593		Mus musculus RIKEN cDNA 1700121N20 gene (1700121N20Rik), long non-coding RNA.			215605
chr12	106231660	106231960	hit	0.028	0.82	12	69.55	4	66	12.45	4.8	894	hit	1700121N20Rik	NR_036593		Mus musculus RIKEN cDNA 1700121N20 gene (1700121N20Rik), long non-coding RNA.			215705
chr13	102993800	102994100	hit	0.028	0.734	11	69.5	6.85	39.85	2.95	3	248	hit	Mast4			Mus musculus microtubule associated serine/threonine kinase family member 4 (Mast4), mRNA.			-206351
chr10	79613620	79613920	hit	0.12	1.042	15.15	69.5	3	55.95	18.1	8.05	14726	hit	C2cd4c	NM_198614	NP_941016	Mus musculus C2 calcium-dependent domain containing 4C (C2cd4c), transcript variant 1, mRNA.			97
chr17	45473500	45473800	hit	0.028	0.742	22.8	69.4	7.4	78.25	9.85	10.9	648	hit	Spats1	;NM_027649	;NP_081925	Mus musculus spermatogenesis associated, serine-rich 1 (Spats1), mRNA.			1137
chr9	64179540	64179840	hit	0.064	0.776	16.5	69.05	7.15	79.9	23.95	31.2	14414	hit	Snapc5	NM_183316	NP_899139	Mus musculus small nuclear RNA activating complex, polypeptide 5 (Snapc5), mRNA.			243
chr5	137628330	137628630	hit	0.046	0.808	17.35	69	8.3	80.85	22.55	13.85	19403	hit	Gm20605;Lrch4	NM_001081962;NM_001168652;NM_146164	;NP_001075431;NP_001162123	Mus musculus leucine-rich repeats and calponin homology (CH) domain containing 4 (Lrch4), transcript variant 2, mRNA.;Mus musculus predicted gene 20605 (Gm20605), long non-coding RNA.			-492
chr11	22972500	22972800	hit	0.112	0.888	7.4	68.85	8.3	82.15	22.9	18.1	7054	hit	Zrsr1	NM_011663	NP_035793	Mus musculus zinc finger (CCCH type), RNA binding motif and serine/arginine rich 1 (Zrsr1), mRNA.			495
chr9	40822200	40822500	hit	0.028	0.674	19.1	68.8	5	57.9	15.2	17.55	2221	hit	Hspa8	;NM_031165	;NP_112442	Mus musculus heat shock protein 8 (Hspa8), mRNA.			20927
chr14	118089500	118089800	hit	0.102	0.874	11.45	68.7	9.8	83.65	21.05	33.5	16434	hit	TRNA_Phe			transfer RNA Phe (anticodon GAA)		chr14.tRNA462-PheGAA	0
chr17	47818080	47818380	hit	0.03	0.784	21.7	68.7	6	56.7	15.35	13	785	hit	Mdfi	NM_001276390;NM_001276391;NM_010783	NP_001263320;NP_034913	Mus musculus MyoD family inhibitor (Mdfi), transcript variant 1, mRNA.;Mus musculus MyoD family inhibitor (Mdfi), transcript variant 3, mRNA.;Mus musculus MyoD family inhibitor (Mdfi), transcript variant 4, mRNA.			14910
chr3	146939690	146939990	hit	0.04	0.722	18	68.6	6	72.75	21	14.9	4127	hit	Ttll7	NM_001302957	NP_001289886	Mus musculus tubulin tyrosine ligase-like family, member 7 (Ttll7), transcript variant 1, mRNA.			-3929
chr18	11470820	11471120	hit	0.038	0.748	13	68.55	5.25	66.7	15.45	13.15	1398	hit	Rbbp8	NM_001252495;NR_045527	;NP_001239424	Mus musculus retinoblastoma binding protein 8 (Rbbp8), transcript variant 2, mRNA.;Mus musculus retinoblastoma binding protein 8 (Rbbp8), transcript variant 4, non-coding RNA.			-162155
chr1	174042320	174042620	hit	0.024	0.816	7.25	68.5	4	50.2	3	14.95	193	hit	Olfr433	NM_146717	NP_666928	Mus musculus olfactory receptor 433 (Olfr433), mRNA.			387
chr1	86481220	86481520	hit	0.026	0.788	16.55	68.45	5.4	56.45	16.35	16.45	1266	hit	Ptma	NM_008972	NP_032998	Mus musculus prothymosin alpha (Ptma), mRNA.			-45215
chr9	64179590	64179890	hit	0.06	0.778	15.6	68.4	5.4	80.3	22.5	27.25	12573	hit	Snapc5	NM_183316	NP_899139	Mus musculus small nuclear RNA activating complex, polypeptide 5 (Snapc5), mRNA.			293
chr8	36952980	36953280	hit	0.022	0.676	3	68.3	5.6	67.6	17.95	10	2598	hit	Dlc1	;NM_001194940	;NP_001181869	Mus musculus deleted in liver cancer 1 (Dlc1), transcript variant 1, mRNA.			-538
chr7	80423220	80423520	hit	0.03	0.754	22	68.3	3	60.45	21.9	20.65	4714	hit	AK155714			Mus musculus B6-derived CD11 +ve dendritic cells cDNA, RIKEN full-length enriched library, clone:F730208F19 product:unclassifiable, full insert sequence.			-3771
chr6	99098000	99098300	hit	0.014	0.668	6.15	68.25	9.35	115.3	9	10	429	hit	Foxp1	NM_001197322;NM_053202	NP_001184251;NP_444432	Mus musculus forkhead box P1 (Foxp1), transcript variant 1, mRNA.			64728
chr16	17406150	17406450	hit	0.098	0.848	20.35	68.2	4	47.8	20.65	31.55	12614	hit	Pi4ka	NM_001001983	NP_001001983	Mus musculus phosphatidylinositol 4-kinase, catalytic, alpha polypeptide (Pi4ka), mRNA.			0
chr17	36315880	36316180	hit	0.012	0.7	10	68.2	6	44.15	11.6	12.65	1133	hit	H2-M10.1	NM_013544	NP_038572	Mus musculus histocompatibility 2, M region locus 10.1 (H2-M10.1), mRNA.			9969
chrX	135009280	135009580	hit	0.082	0.806	10.45	68.15	4	65.85	29.45	25.45	14207	hit	Zmat1	NM_175446	NP_780655	Mus musculus zinc finger, matrin type 1 (Zmat1), mRNA.			-71
chr11	82883110	82883410	hit	0.03	0.8	18.5	67.9	5.9	41	19	17.85	1739	hit	Rad51d	NM_001277938;NM_001277939;NM_001277941;NM_001277942;NM_011235;NR_102717;NR_102718;NR_102719;NR_102720	;NP_001264867;NP_001264868;NP_001264870;NP_001264871;NP_035365	Mus musculus RAD51 homolog D (Rad51d), transcript variant 1, mRNA.;Mus musculus RAD51 homolog D (Rad51d), transcript variant 2, mRNA.;Mus musculus RAD51 homolog D (Rad51d), transcript variant 3, mRNA.;Mus musculus RAD51 homolog D (Rad51d), transcript variant 4, mRNA.;Mus musculus RAD51 homolog D (Rad51d), transcript variant 5, mRNA.;Mus musculus RAD51 homolog D (Rad51d), transcript variant 6, non…			7213
chr13	8995800	8996100	hit	0.106	0.964	16.75	67.65	11.7	73.7	20.6	19.1	33908	hit	Gtpbp4	NM_027000	NP_081276	Mus musculus GTP binding protein 4 (Gtpbp4), mRNA.			0
chr19	21654800	21655100	hit	0.032	0.642	13.6	67.55	6	45	17.85	13.7	804	hit	Abhd17b	;NM_146096	;NP_666208	Mus musculus abhydrolase domain containing 17B (Abhd17b), mRNA.			1491
chr1	165966280	165966580	hit	0.012	0.634	13	67.4	5	44.7	10.85	14.85	773	hit	Pou2f1	NM_198933;NM_198934	NP_945151;NP_945152	Mus musculus POU domain, class 2, transcription factor 1 (Pou2f1), transcript variant 3, mRNA.;Mus musculus POU domain, class 2, transcription factor 1 (Pou2f1), transcript variant 4, mRNA.			-31332
chr2	60141670	60141970	hit	0.014	0.626	8.6	67.4	4.15	63.3	16	13.55	409	hit	Baz2b	;NM_001001182	;NP_001001182	Mus musculus bromodomain adjacent to zinc finger domain, 2B (Baz2b), mRNA.			-15860
chr17	44317150	44317450	hit	0.006	0.57	7.3	67.35	4	43	7.7	10	111	hit	Clic5	NM_172621	NP_766209	Mus musculus chloride intracellular channel 5 (Clic5), mRNA.			80044
chr9	118447460	118447760	hit	0.032	0.78	6	67.2	6	89.2	20.85	20.25	1398	hit	4933432G23Rik	NR_040716		Mus musculus RIKEN cDNA 4933432G23 gene (4933432G23Rik), long non-coding RNA.			17621
chr3	135499040	135499340	hit	0.016	0.716	13	66.9	4.55	38.15	23.2	17	1024	hit	Manba	;NM_027288	;NP_081564	Mus musculus mannosidase, beta A, lysosomal (Manba), mRNA.			13429
chr10	120200940	120201240	hit	0.064	0.794	6	66.85	7	40.05	22.05	23.8	3221	hit	Irak3	;NM_028679	;NP_082955	Mus musculus interleukin-1 receptor-associated kinase 3 (Irak3), mRNA.			296
chr11	69072600	69072900	hit	0.04	0.74	17.4	66.25	8.95	104.85	16.2	14.75	3335	hit	Tmem107	NM_025838;NM_028336	NP_080114;NP_082612	Mus musculus transmembrane protein 107 (Tmem107), transcript variant 1, mRNA.;Mus musculus transmembrane protein 107 (Tmem107), transcript variant 2, mRNA.			1791
chr9	118447400	118447700	hit	0.032	0.8	3.9	66.15	4.6	88.35	21.6	18.8	1576	hit	4933432G23Rik	NR_040716		Mus musculus RIKEN cDNA 4933432G23 gene (4933432G23Rik), long non-coding RNA.			17561
chr2	152573820	152574120	hit	0.026	0.806	14.15	66.05	4	42.45	15	7.45	384	hit	Defb21	NM_207276	NP_997159	Mus musculus defensin beta 21 (Defb21), mRNA.			1076
chr15	12974060	12974360	hit	0.014	0.664	19.65	65.85	7.65	52.5	10	19.9	368	hit	Drosha			Mus musculus drosha, ribonuclease type III (Drosha), transcript variant 2, mRNA.			68461
chr7	136894480	136894780	hit	0.06	0.952	17.1	65.75	7.75	56.25	28	32.6	31629	hit	Mgmt	NM_008598	NP_032624	Mus musculus O-6-methylguanine-DNA methyltransferase (Mgmt), mRNA.			0
chr17	48041280	48041580	hit	0.012	0.546	10	65.3	4	65.2	6	6.3	3597	hit	1700122O11Rik	NM_029689	NP_083965	Mus musculus RIKEN cDNA 1700122O11 gene (1700122O11Rik), mRNA.			-2987
chr15	7173370	7173670	hit	0.014	0.536	9	65.25	7	99.9	18.5	23.25	251	hit	Lifr	NM_001113386;NM_013584	;NP_038612	Mus musculus leukemia inhibitory factor receptor (Lifr), transcript variant 1, mRNA.			32828
chrX	102294680	102294980	hit	0.012	0.664	9.85	65.2	6.2	38.2	12.1	13	238	hit	Gm14858	NR_040285		Mus musculus predicted gene 14858 (Gm14858), long non-coding RNA.			42029
chr12	84891860	84892160	hit	0.026	0.792	3.9	65.05	4	58.45	10	12.6	911	hit	Ltbp2	;NM_013589	;NP_038617	Mus musculus latent transforming growth factor beta binding protein 2 (Ltbp2), mRNA.			-15365
chr12	4817620	4817920	hit	0.098	0.858	16.2	65	7	39.25	21.25	9.3	14829	hit	Sf3b6	NM_025323	NP_079599	Mus musculus splicing factor 3B, subunit 6 (Sf3b6), mRNA.			12
chr19	14440200	14440500	hit	0.014	0.578	9.6	64.85	7	51.5	11	14.75	217	hit	Rnu6	NR_003027		Mus musculus U6 small nuclear RNA (Rnu6), small nuclear RNA.			-1694
chr19	9134800	9135100	hit	0.07	0.84	16.5	64.85	6.2	61.45	25.95	15.75	4940	hit	AK048878			Mus musculus 0 day neonate cerebellum cDNA, RIKEN full-length enriched library, clone:C230078J11 product:weakly similar to prostatic steroid-binding protein chain C1 precursor [Rattus norvegicus], full insert sequence.			-56
chr11	48856960	48857260	hit	0.056	0.674	22.85	64.65	8	69.25	38.8	33.75	29694	hit	TRNA_Leu			transfer RNA Leu (anticodon AAG)		chr11.tRNA2021-LeuAAG	0
chr8	120530560	120530860	hit	0.022	0.73	18.25	64	6	58.35	21.3	21.95	799	hit	Gse1	NM_001145897	NP_001139369	Mus musculus genetic suppressor element 1 (Gse1), transcript variant 3, mRNA.			-4996
chr11	69072430	69072730	hit	0.04	0.79	11.4	64	4.05	104.7	18	16.85	1702	hit	Tmem107	NM_025838;NM_028336	NP_080114;NP_082612	Mus musculus transmembrane protein 107 (Tmem107), transcript variant 1, mRNA.;Mus musculus transmembrane protein 107 (Tmem107), transcript variant 2, mRNA.			1621
chr17	69401240	69401540	hit	0.01	0.664	18.8	64	3	63	13	9	1077	hit	C030034I22Rik	NR_026848		Mus musculus RIKEN cDNA C030034I22 gene (C030034I22Rik), long non-coding RNA.			-14906
chr12	112678130	112678430	hit	0.058	0.884	13.6	63.95	4.7	55.5	20	21.9	7589	hit	Zbtb42	;NM_001100460	;NP_001093930	Mus musculus zinc finger and BTB domain containing 42 (Zbtb42), mRNA.			-409
chr10	99573240	99573540	hit	0.03	0.7	3.8	63.65	4.55	38.45	6	16.95	193	hit	Gm20110	NR_038019		Mus musculus predicted gene, 20110 (Gm20110), long non-coding RNA.			-35630
chr17	45457020	45457320	hit	0.022	0.728	17.75	63.65	8	52.4	20.2	20.1	1056	hit	Spats1	;NM_027649	;NP_081925	Mus musculus spermatogenesis associated, serine-rich 1 (Spats1), mRNA.			17617
chr10	69745920	69746220	hit	0.008	0.566	9.05	63.55	3.95	48.65	14.1	11.7	183	hit	Ank3			Mus musculus ankyrin 3, epithelial (Ank3), transcript variant 1, mRNA.			-39293
chr6	34709920	34710220	hit	0.024	0.764	9.6	63.55	12.6	120.85	27.65	12.7	6405	hit	Cald1	NM_145575	NP_663550	Mus musculus caldesmon 1 (Cald1), mRNA.			476
chr14	105678140	105678440	hit	0.032	0.696	4.3	63.5	4	56.1	11.4	7.55	515	hit	AK045385			Mus musculus adult male corpora quadrigemina cDNA, RIKEN full-length enriched library, clone:B230112B02 product:unclassifiable, full insert sequence.			-34415
chr11	69072340	69072640	hit	0.036	0.78	16.25	63.45	2.75	95.85	17.85	20.05	1262	hit	Tmem107	NM_025838;NM_028336	NP_080114;NP_082612	Mus musculus transmembrane protein 107 (Tmem107), transcript variant 1, mRNA.;Mus musculus transmembrane protein 107 (Tmem107), transcript variant 2, mRNA.			1531
chr9	62118800	62119100	hit	0.006	0.584	9.6	63.35	3	56.65	15.45	10.05	1296	hit	Mir5133	NR_039595		Mus musculus microRNA 5133 (Mir5133), microRNA.			3493
chr12	73286910	73287210	hit	0.088	0.91	19.15	63.2	6.15	37	31.3	27.85	22612	hit	Slc38a6			Mus musculus solute carrier family 38, member 6 (Slc38a6), mRNA.			0
chr13	34150450	34150750	hit	0.04	0.816	14.25	63.15	13	77	22.7	8.45	5426	hit	AB351889			Mus musculus non-coding RNA, oocyte_piRNA2705, complete sequence.			-9641
chr1	74308000	74308300	hit	0.018	0.764	14	63	4.65	86.7	20.3	26.95	1124	hit	Tmbim1	NM_027154	NP_081430	Mus musculus transmembrane BAX inhibitor motif containing 1 (Tmbim1), mRNA.			-3664
chr13	8995860	8996160	hit	0.114	0.982	21.05	62.95	12	76.15	24.75	20.6	38279	hit	Gtpbp4	NM_027000	NP_081276	Mus musculus GTP binding protein 4 (Gtpbp4), mRNA.			0
chr5	148375320	148375620	hit	0.038	0.788	7.95	62.8	7	41.65	18.55	15.35	1732	hit	Slc7a1	NM_001301424	NP_001288353	Mus musculus solute carrier family 7 (cationic amino acid transporter, y+ system), member 1 (Slc7a1), transcript variant 2, mRNA.			17194
chr10	95565610	95565910	hit	0.024	0.728	17.3	62.75	6.6	63.8	14.95	20	3969	hit	Nudt4	NM_027722	NP_081998	Mus musculus nudix (nucleoside diphosphate linked moiety X)-type motif 4 (Nudt4), mRNA.			-1443
chr19	14440240	14440540	hit	0.014	0.566	9	62.7	6.6	48.9	8.9	15.1	229	hit	Rnu6	NR_003027		Mus musculus U6 small nuclear RNA (Rnu6), small nuclear RNA.			-1734
chr15	7172660	7172960	hit	0.014	0.69	3	62.1	8	92.6	13.5	22.15	410	hit	Lifr	NM_001113386;NM_013584	;NP_038612	Mus musculus leukemia inhibitory factor receptor (Lifr), transcript variant 1, mRNA.			32118
chr13	109639690	109639990	hit	0.016	0.616	5.15	62	7	55.5	10	17.4	488	hit	AB351889			Mus musculus non-coding RNA, oocyte_piRNA2705, complete sequence.			34189
chr12	105584900	105585200	hit	0.038	0.832	17	61.65	7	69.8	35.8	45.65	8822	hit	Bdkrb1	NM_007539	NP_031565	Mus musculus bradykinin receptor, beta 1 (Bdkrb1), mRNA.			-18890
chr8	83594100	83594400	hit	0.084	0.936	18.4	61.5	9	57.95	31.8	27.4	22602	hit	Tecr	NM_027179;NM_134118	NP_081455;NP_598879	Mus musculus trans-2,3-enoyl-CoA reductase (Tecr), transcript variant 1, mRNA.;Mus musculus trans-2,3-enoyl-CoA reductase (Tecr), transcript variant 2, mRNA.			90
chr6	101378810	101379110	hit	0.02	0.664	2.8	61.5	4	81.85	8.95	8.65	1460	hit	Pdzrn3	;NM_018884	;NP_061372	Mus musculus PDZ domain containing RING finger 3 (Pdzrn3), mRNA.			-913
chr10	87046860	87047160	hit	0.024	0.71	3.3	61.1	3.15	52.05	9.95	3.65	809	hit	1700113H08Rik	NM_029685	NP_083961	Mus musculus RIKEN cDNA 1700113H08 gene (1700113H08Rik), mRNA.			-10885
chr3	95224530	95224830	hit	0.014	0.668	19.9	61.1	5.35	75.65	26.05	12.65	7401	hit	Cdc42se1	NM_172395	NP_765983	Mus musculus CDC42 small effector 1 (Cdc42se1), transcript variant 1, mRNA.			-3593
chr1	131822580	131822880	hit	0.018	0.686	6.75	60.95	6	41.55	19.35	9	432	hit	Slc41a1	NM_173865	NP_776290	Mus musculus solute carrier family 41, member 1 (Slc41a1), mRNA.			-5131
chr16	94371740	94372040	hit	0.042	0.758	20.4	60.95	7.05	42.35	14.35	19.9	13126	hit	Pigp	NM_001159617;NM_019543	NP_062416	Mus musculus phosphatidylinositol glycan anchor biosynthesis, class P (Pigp), transcript variant 4, mRNA.;Mus musculus phosphatidylinositol glycan anchor biosynthesis, class P (Pigp), transcript variant 6, mRNA.			-725
chr14	50924870	50925170	hit	0.154	0.98	18.05	60.65	10.6	87.8	28.75	28.2	33381	hit	Apex1	NM_009687	NP_033817	Mus musculus apurinic/apyrimidinic endonuclease 1 (Apex1), mRNA.			0
chr15	7172480	7172780	hit	0.016	0.648	7	60.45	8.5	69.35	16.25	21.7	622	hit	Lifr	NM_001113386;NM_013584	;NP_038612	Mus musculus leukemia inhibitory factor receptor (Lifr), transcript variant 1, mRNA.			31938
chr6	34708000	34708300	hit	0.016	0.694	3.85	60.3	4	93.05	15.5	10.8	915	hit	Cald1	NM_145575	NP_663550	Mus musculus caldesmon 1 (Cald1), mRNA.			-1143
chr8	60983300	60983600	hit	0.152	0.964	21.1	60.2	6.75	57.85	31.3	24.8	49088	hit	Clcn3	;NM_007711;NM_173873;NM_173874	;NP_031737;NP_776299	Mus musculus chloride channel 3 (Clcn3), transcript variant a, mRNA.;Mus musculus chloride channel 3 (Clcn3), transcript variant b, mRNA.;Mus musculus chloride channel 3 (Clcn3), transcript variant e, mRNA.			0
chr6	54992760	54993060	hit	0.116	0.96	19.6	60.1	13	85.15	62.55	40.65	56431	hit	Ggct	NM_026637	NP_080913	Mus musculus gamma-glutamyl cyclotransferase (Ggct), mRNA.			0
chr10	120415750	120416050	hit	0.034	0.704	11.25	60.1	7.15	44.25	12.55	8.5	593	hit	9230105E05Rik	NR_040626		Mus musculus RIKEN cDNA 9230105E05 gene (9230105E05Rik), long non-coding RNA.			26227
chr15	90788420	90788720	hit	0.016	0.706	7.9	60	5.1	49.2	8.55	6.95	301	hit	Cpne8	;NM_001033851;NM_025815	;NP_001029023;NP_080091	Mus musculus copine VIII (Cpne8), transcript variant 1, mRNA.;Mus musculus copine VIII (Cpne8), transcript variant 2, mRNA.			-109032
chr17	69401180	69401480	hit	0.012	0.682	18.9	60	3	65.05	12	8	1008	hit	C030034I22Rik	NR_026848		Mus musculus RIKEN cDNA C030034I22 gene (C030034I22Rik), long non-coding RNA.			-14966
chr6	55373210	55373510	hit	0.01	0.602	7	60	5.05	64.75	14.45	6.3	145	hit	Ghrhr	;NM_001003685	;NP_001003685	Mus musculus growth hormone releasing hormone receptor (Ghrhr), mRNA.			-2784
chr3	53614840	53615140	hit	0.012	0.746	6.9	59.95	6	51.45	14.7	14.75	329	hit	Frem2	NM_172862	NP_766450	Mus musculus Fras1 related extracellular matrix protein 2 (Frem2), mRNA.			42214
chr19	5391900	5392200	hit	0.026	0.792	9.8	59.8	4.45	47.5	10.25	14.15	643	hit	Tsga10ip			SubName: Full=Protein Tsga10ip ;			2200
chr12	79626120	79626420	hit	0.014	0.67	12.1	59.8	7	48.3	12.2	12	2216	hit	9430078K24Rik	NR_131075		Mus musculus RIKEN cDNA 9430078K24 gene (9430078K24Rik), transcript variant 3, long non-coding RNA.			298312
chr3	108388720	108389020	hit	0.018	0.776	5.6	59.3	5	46.25	18.85	18.55	2060	hit	Psrc1	NM_019976	NP_064360	Mus musculus proline/serine-rich coiled-coil 1 (Psrc1), transcript variant 2, mRNA.			4882
chr2	91978720	91979020	hit	0.012	0.796	13.9	59.2	3.65	60.8	10	16.6	1772	hit	Dgkz	NM_138306	NP_612179	Mus musculus diacylglycerol kinase zeta (Dgkz), transcript variant 2, mRNA.			-13120
chr1	86525630	86525930	hit	0.12	0.916	15.2	58.9	6	100.35	17.85	17.95	15838	hit	Ptma	NM_008972	NP_032998	Mus musculus prothymosin alpha (Ptma), mRNA.			-805
chr11	69072000	69072300	hit	0.026	0.724	14.9	58.6	6	82	22.45	8.7	908	hit	Tmem107	NM_025838;NM_028336	NP_080114;NP_082612	Mus musculus transmembrane protein 107 (Tmem107), transcript variant 1, mRNA.;Mus musculus transmembrane protein 107 (Tmem107), transcript variant 2, mRNA.			1191
chr6	134855980	134856280	hit	0.036	0.698	19	58.35	8.5	58.05	18.5	21	340	hit	Crebl2			Mus musculus cAMP responsive element binding protein-like 2 (Crebl2), mRNA.			6877
chr8	57496140	57496440	hit	0.02	0.708	3	58.1	7.5	61.9	13.6	12.1	474	hit	2500002B13Rik	NR_126553		Mus musculus RIKEN cDNA 2500002B13 gene (2500002B13Rik), transcript variant 1, long non-coding RNA.			8177
chr8	110950230	110950530	hit	0.048	0.834	13	57.8	6	88.5	22.5	23.8	1382	hit	St3gal2	NM_009179	NP_033205	Mus musculus ST3 beta-galactoside alpha-2,3-sialyltransferase 2 (St3gal2), mRNA.			30365
chr6	52266290	52266590	hit	0.038	0.77	5.2	57.75	5.5	76.65	22.25	15.8	3706	hit	Hottip	NR_110441;NR_110442		Mus musculus Hoxa distal transcript antisense RNA (Hottip), transcript variant 1, long non-coding RNA.;Mus musculus Hoxa distal transcript antisense RNA (Hottip), transcript variant 2, long non-coding RNA.			3515
chr3	96501830	96502130	hit	0.05	0.7	16.05	57.6	6	64.75	15.2	27.45	9642	hit	TRNA_Glu			transfer RNA Glu (anticodon CTC)		chr3.tRNA745-GluCTC	-312
chr1	132565350	132565650	hit	0.028	0.828	5.85	57.6	5.25	58.45	19	14.35	1132	hit	Cntn2	;NM_177129	;NP_796103	Mus musculus contactin 2 (Cntn2), mRNA.			-22410
chr14	52338680	52338980	hit	0.032	0.692	14	57.05	6	48.25	23.6	32.4	5381	hit	Sall2	NM_015772	NP_056587	Mus musculus sal-like 2 (Drosophila) (Sall2), transcript variant 1, mRNA.			-10010
chr4	147904780	147905080	hit	0.112	0.962	17	57.05	10.2	80.65	22	21.2	27056	hit	Mfn2	NM_001285920;NM_001285921;NM_001285922;NM_133201	NP_573464	Mus musculus mitofusin 2 (Mfn2), transcript variant 1, mRNA.;Mus musculus mitofusin 2 (Mfn2), transcript variant 2, mRNA.;Mus musculus mitofusin 2 (Mfn2), transcript variant 3, mRNA.;Mus musculus mitofusin 2 (Mfn2), transcript variant 4, mRNA.			0
chr7	35232840	35233140	hit	0.03	0.778	18.1	56.75	4.4	52.45	21.6	13.6	8176	hit	TRNA_Thr			transfer RNA Thr (anticodon AGT)		chr7.tRNA1217-ThrAGT	1702
chr17	14171530	14171830	hit	0.006	0.77	7	56.65	5	50.6	6.75	3.6	1470	hit	Dact2	NM_172826	NP_766414	Mus musculus dapper homolog 2, antagonist of beta-catenin (xenopus) (Dact2), mRNA.			32000
chr7	144942500	144942800	hit	0.09	0.932	15.6	56.35	4.1	68.6	11.8	12	5858	hit	Ccnd1	NM_007631	NP_031657	Mus musculus cyclin D1 (Ccnd1), mRNA.			-2575
chr7	144942900	144943200	hit	0.086	0.958	14.95	56.3	2	84.15	10.4	12	10563	hit	Ccnd1	NM_007631	NP_031657	Mus musculus cyclin D1 (Ccnd1), mRNA.			-2975
chr12	112678180	112678480	hit	0.068	0.914	15	56.25	4	51	16.4	19	10111	hit	Zbtb42	;NM_001100460	;NP_001093930	Mus musculus zinc finger and BTB domain containing 42 (Zbtb42), mRNA.			-359
chr6	52030940	52031240	hit	0.024	0.706	10.95	56	9.2	94.7	21	29.85	1049	hit	Skap2	NM_018773	NP_061243	Mus musculus src family associated phosphoprotein 2 (Skap2), mRNA.			-18391
chr5	127235320	127235620	hit	0.052	0.79	17.95	55.85	6	42	37.35	36.3	10479	hit	Tmem132c	NM_175432	NP_780641	Mus musculus transmembrane protein 132C (Tmem132c), mRNA.			-6205
chr13	66199770	66200070	hit	0.08	0.912	15.75	55.85	11.5	87.9	19	21.35	143	hit	Gm10324	NM_001177832	NP_001171303	Mus musculus predicted gene 10324 (Gm10324), mRNA.			86317
chr14	55603640	55603940	hit	0.032	0.852	14.25	55.65	6	47.3	20.85	20.1	9844	hit	Irf9	NM_001159417;NM_008394	NP_032420	Mus musculus interferon regulatory factor 9 (Irf9), transcript variant 1, mRNA.;Mus musculus interferon regulatory factor 9 (Irf9), transcript variant 3, mRNA.			-44
chr19	45574040	45574340	hit	0.018	0.798	11.2	55.5	7.3	70	16	26.85	8287	hit	Dpcd	;NM_172639	;NP_766227	Mus musculus deleted in primary ciliary dyskinesia (Dpcd), mRNA.			13425
chr8	44973480	44973780	hit	0.024	0.756	3.45	55.4	5.7	52.9	17	12.2	604	hit	Fat1	NM_001081286	NP_001074755	Mus musculus FAT tumor suppressor homolog 1 (Drosophila) (Fat1), mRNA.			23272
chr17	45456820	45457120	hit	0.03	0.716	17.5	55.4	7	49.5	30.45	19.8	1242	hit	Spats1	;NM_027649	;NP_081925	Mus musculus spermatogenesis associated, serine-rich 1 (Spats1), mRNA.			17817
chrX	153722580	153722880	hit	0.014	0.556	8	55.35	4.85	63.85	23.15	9.6	655	hit	2210013O21Rik	NM_027327	NP_081603	Mus musculus RIKEN cDNA 2210013O21 gene (2210013O21Rik), mRNA.			-673
chr1	165630540	165630840	hit	0.014	0.654	13.35	55.1	5.7	46.75	16	10.25	1346	hit	Mpzl1	NM_001001880;NM_001083897	NP_001001880;NP_001077366	Mus musculus myelin protein zero-like 1 (Mpzl1), transcript variant 1, mRNA.;Mus musculus myelin protein zero-like 1 (Mpzl1), transcript variant 2, mRNA.			3700
chr10	59879740	59880040	hit	0.136	1.002	9	55.05	10	86.95	31	23	29438	hit	Dnajb12	;NM_019965	;NP_064349	Mus musculus DnaJ (Hsp40) homolog, subfamily B, member 12 (Dnajb12), mRNA.			149
chr8	121898930	121899230	hit	0.038	0.836	17.35	54.95	4	43.15	18.65	9.9	3641	hit	Slc7a5			Mus musculus solute carrier family 7 (cationic amino acid transporter, y+ system), member 5 (Slc7a5), mRNA.			-2365
chr10	93688360	93688660	hit	0.044	0.806	12.25	54.7	6.25	80.25	22.75	2.75	613	hit	Gm15915	NR_038017		Mus musculus predicted gene 15915 (Gm15915), long non-coding RNA.			-5038
chr8	84639600	84639900	hit	0.174	0.914	15.45	54.7	8.8	65	24.75	21.4	37962	hit	Ier2	NM_010499	NP_034629	Mus musculus immediate early response 2 (Ier2), mRNA.			22951
chr5	91517920	91518220	hit	0.092	0.956	15.85	54.55	6	56.4	18.4	16	4937	hit	Parm1	NM_145562	NP_663537	Mus musculus prostate androgen-regulated mucin-like protein 1 (Parm1), mRNA.			220
chr7	144942100	144942400	hit	0.07	0.812	15.45	54	7.7	70.2	22.4	29.55	9071	hit	Ccnd1	NM_007631	NP_031657	Mus musculus cyclin D1 (Ccnd1), mRNA.			-2175
chr9	90697600	90697900	hit	0.022	0.658	8.45	53.85	5.35	37.6	12.75	15.9	285	hit	AK043331			Mus musculus 7 days neonate cerebellum cDNA, RIKEN full-length enriched library, clone:A730085P08 product:unclassifiable, full insert sequence.			130959
chr11	23078420	23078720	hit	0.004	0.66	11.6	53.75	7	59.8	25	14	518	hit	Fam161a	NM_028672	NP_082948	Mus musculus family with sequence similarity 161, member A (Fam161a), mRNA.			58420
chr13	66199840	66200140	hit	0.072	0.856	8.35	53.5	9.55	76.95	17	20.6	140	hit	Gm10324	NM_001177832	NP_001171303	Mus musculus predicted gene 10324 (Gm10324), mRNA.			86387
chr10	59879820	59880120	hit	0.134	0.984	9.4	53.35	10.75	84.3	30.05	24.5	27442	hit	Dnajb12	;NM_019965	;NP_064349	Mus musculus DnaJ (Hsp40) homolog, subfamily B, member 12 (Dnajb12), mRNA.			229
chr2	104712280	104712580	hit	0.118	0.964	13.7	53	7.1	43.5	18	6	14105	hit	Tcp11l1	NM_177190	NP_796164	Mus musculus t-complex 11 like 1 (Tcp11l1), mRNA.			-118
chr6	100704740	100705040	hit	0.158	1.094	4	52.8	8.75	85.65	18.45	12.05	15787	hit	Gxylt2	NM_198612	NP_941014	Mus musculus glucoside xylosyltransferase 2 (Gxylt2), mRNA.			6
chr10	93688400	93688700	hit	0.048	0.808	9.1	51.75	5.1	70.3	21.2	2	635	hit	Gm15915	NR_038017		Mus musculus predicted gene 15915 (Gm15915), long non-coding RNA.			-5078
chr14	34664120	34664420	hit	0.014	0.774	11.85	51.15	5.95	63.75	10.35	5.15	1094	hit	Wapal	NM_001004436;NM_001301330	NP_001004436;NP_001288259	Mus musculus wings apart-like homolog (Drosophila) (Wapal), transcript variant 1, mRNA.;Mus musculus wings apart-like homolog (Drosophila) (Wapal), transcript variant 2, mRNA.			-9507
chr3	27710980	27711280	hit	0.168	1.09	13	49.65	8	70.9	15.9	14	27208	hit	Fndc3b			Mus musculus fibronectin type III domain containing 3B (Fndc3b), mRNA.			26
chr5	121879520	121879820	hit	0.034	0.858	3.9	49.4	5	39.3	12.65	5.25	2647	hit	Cux2			Mus musculus cut-like homeobox 2 (Cux2), mRNA.			-13455
chr11	104230920	104231220	hit	0.128	0.906	11	49.3	4.8	40.35	18.85	19	26563	hit	Mapt	;NM_001038609;NM_001285454;NM_001285455;NM_001285456;NM_010838	;NP_001033698;NP_001272383;NP_001272384;NP_001272385;NP_034968	Mus musculus microtubule-associated protein tau (Mapt), transcript variant 1, mRNA.;Mus musculus microtubule-associated protein tau (Mapt), transcript variant 2, mRNA.;Mus musculus microtubule-associated protein tau (Mapt), transcript variant 3, mRNA.;Mus musculus microtubule-associated protein tau (Mapt), transcript variant 4, mRNA.;Mus musculus microtubule-associated protein tau (Mapt), transcr…			-215
chr5	91517960	91518260	hit	0.088	0.946	12.4	49.2	6.55	51.85	22.55	13.95	4992	hit	Parm1	NM_145562	NP_663537	Mus musculus prostate androgen-regulated mucin-like protein 1 (Parm1), mRNA.			260
chr6	100438900	100439200	hit	0.036	0.774	7.2	47.55	11.3	114.65	23.35	17.9	6287	hit	1700049E22Rik	NR_040525		Mus musculus RIKEN cDNA 1700049E22 gene (1700049E22Rik), long non-coding RNA.			-88199
chr4	101264720	101265020	hit	0.18	1.106	7	47.2	6	47.9	14.1	10.9	15919	hit	Jak1	NM_146145	NP_666257	Mus musculus Janus kinase 1 (Jak1), mRNA.			261
chr6	82844500	82844800	hit	0.018	0.704	13	46	9.55	54.85	39.4	27.1	3279	hit	2310069B03Rik	;NR_040520		Mus musculus RIKEN cDNA 2310069B03 gene (2310069B03Rik), long non-coding RNA.			37052
chr8	48533450	48533750	hit	0.048	0.748	6.45	45.95	5.4	36.85	7.6	9.3	353	hit	Tenm3			Mus musculus teneurin transmembrane protein 3 (Tenm3), transcript variant 2, mRNA.			21481
chr6	97216780	97217080	hit	0.02	0.66	6	45.45	10	68.65	10	17.5	291	hit	Arl6ip5	NM_022992	NP_075368	Mus musculus ADP-ribosylation factor-like 6 interacting protein 5 (Arl6ip5), mRNA.			5988
chr1	97636370	97636670	hit	0.014	0.662	7.85	44.95	5.6	76.4	16.6	13.95	381	hit	D1Ertd622e	NM_133825	NP_598586	Mus musculus DNA segment, Chr 1, ERATO Doi 622, expressed (D1Ertd622e), mRNA.			9667
chr7	35880040	35880340	hit	0.028	0.832	8.9	44.9	5.65	40.65	35.9	28.9	5041	hit	Zfp507	NM_177739	NP_808407	Mus musculus zinc finger protein 507 (Zfp507), mRNA.			-77051
chr6	5969160	5969460	hit	0.026	0.68	3.25	44.5	4.2	58.9	14.4	5.75	2547	hit	1700019G24Rik	NR_040255		Mus musculus RIKEN cDNA 1700019G24 gene (1700019G24Rik), long non-coding RNA.			7932
chr11	22971940	22972240	hit	0.076	0.848	8.35	44.2	9.3	84.1	36.95	14.15	10359	hit	Zrsr1	NM_011663	NP_035793	Mus musculus zinc finger (CCCH type), RNA binding motif and serine/arginine rich 1 (Zrsr1), mRNA.			0
chr11	22972060	22972360	hit	0.094	0.902	4.2	44.15	10.65	76.35	27.45	14.8	7668	hit	Zrsr1	NM_011663	NP_035793	Mus musculus zinc finger (CCCH type), RNA binding motif and serine/arginine rich 1 (Zrsr1), mRNA.			55
chr6	99098680	99098980	hit	0.008	0.658	3	44	6.3	112.2	18.95	8.8	919	hit	Foxp1	NM_001197322;NM_053202	NP_001184251;NP_444432	Mus musculus forkhead box P1 (Foxp1), transcript variant 1, mRNA.			64048
chr6	34710160	34710460	hit	0.028	0.782	4.55	43	12.6	90.9	15.4	14.35	5428	hit	Cald1	NM_145575	NP_663550	Mus musculus caldesmon 1 (Cald1), mRNA.			716
chr11	68906930	68907230	hit	0.018	0.726	9.45	43	6.85	44.75	23.9	12.25	3926	hit	Gm15772	NM_009080	NP_033106	Mus musculus predicted gene 15772 (Gm15772), non-coding RNA.			5295
chr6	47282060	47282360	hit	0.002	0.588	4	42.95	3.05	60.6	17.8	17.7	437	hit	Cntnap2	NM_025771	NP_080047	Mus musculus contactin associated protein-like 2 (Cntnap2), transcript variant 2, mRNA.			37664
chr7	29153850	29154150	hit	0.022	0.756	8.8	41	4.9	102.5	9.35	12.85	774	hit	Fam98c			Mus musculus family with sequence similarity 98, member C (Fam98c), mRNA.			2032
chr6	99098800	99099100	hit	0.01	0.638	4.05	40.9	9.9	90.7	18.3	14	805	hit	Foxp1	NM_001197322;NM_053202	NP_001184251;NP_444432	Mus musculus forkhead box P1 (Foxp1), transcript variant 1, mRNA.			63928
chr6	51211750	51212050	hit	0.024	0.754	3.15	40.9	9	64.65	17.35	14	1041	hit	Mir148a	NR_029719		Mus musculus microRNA 148a (Mir148a), microRNA.			57859
chr17	84179020	84179320	hit	0.03	0.76	5.8	39.1	6.2	45.9	9	17	1149	hit	Zfp36l2	NM_001001806	NP_001001806	Mus musculus zinc finger protein 36, C3H type-like 2 (Zfp36l2), mRNA.			8626
chr6	99098840	99099140	hit	0.01	0.65	6.05	33.7	9.25	75.95	16	12.25	873	hit	Foxp1	NM_001197322;NM_053202	NP_001184251;NP_444432	Mus musculus forkhead box P1 (Foxp1), transcript variant 1, mRNA.			63888
