# Supplementary material for: Reciprocal, methylation-dependent binding of Zfp57 and Gzf1 safeguards Dlk1-Dio3 imprinting during developmental reprogramming
Source: Research Square preprint supplement (doi:10.21203/rs.3.rs-7243168/v1), 2025-09-22
Supplement: Supplementary file 8 [file f3831e207de86c0558c1e847.xlsx]

## Sheet: MM1n2VsUS1n2.sgrna_summary
sgrna	Gene	control_count	treatment_count	control_mean	treat_mean	LFC	control_var	adj_var	score	p.low	p.high	p.twosided	FDR	high_in_treatment
Ehd2_67702	Ehd2	3197.3/2453.1/2463.7	4.4481e+05/1.7609e+06	2463.7	1102800	8.8056	269130	122070	3149.5	1	0	0	0	TRUE
Fam196b_75315	Fam196b	3263.5/2816.4/2596.7	4.7614e+05/1.6387e+06	2816.4	1057400	8.552	124050	145930	2760.8	1	0	0	0	TRUE
Socs3_2900	Socs3	11800/9377.4/8905.6	1.04e+06/3.5605e+06	9377.4	2300300	7.9382	3045300	727080	2686.7	1	0	0	0	TRUE
Hoxa9_7800	Hoxa9	1875/1294.4/1586.6	2.8438e+05/1.1015e+06	1586.6	692940	8.7697	84273	67895	2653.3	1	0	0	0	TRUE
1700113H08Rik_42972	1700113H08Rik	3983.3/3377.1/3084.6	5.2686e+05/1.709e+06	3377.1	1118000	8.3704	226520	185920	2584.9	1	0	0	0	TRUE
Apoa1bp_63738	Apoa1bp	57.691/1.012/1.1088	5260/6236.4	1.1088	5748.2	11.413	1600.8	5.0105	2567.5	1	0	0	0	TRUE
Zfp28_19153	Zfp28	0.65558/6.0721/0	749.98/7447.1	0.65558	4098.5	11.274	14.884	2.5846	2549	1	0	0	0	TRUE
Kdm2b_21673	Kdm2b	0.65558/1.012/4.4351	5.0675/9301.7	1.012	4653.4	11.176	5.9221	4.4643	2201.9	1	0	0	0	TRUE
Hist1h4i_69211	Hist1h4i	0/0/3.3263	481.41/6486.2	0.65558	3483.8	11.04	5.5321	2.5846	2166.6	1	0	0	0	TRUE
C2cd2l_37209	C2cd2l	0.65558/1.012/4.4351	1545.6/7274.1	1.012	4409.9	11.098	5.9221	4.4643	2086.6	1	0	0	0	TRUE
Dclk2_36126	Dclk2	507.42/798.48/687.43	1.0013e+05/5.1647e+05	687.43	308300	8.8068	22369	22295	2060.1	1	0	0	0	TRUE
Slfn2_16102	Slfn2	0/78.937/3.3263	608.1/17960	3.3263	9283.8	11.068	2864.1	20.343	2057.6	1	0	0	0	TRUE
Rab42_62530	Rab42	741.46/677.04/624.23	1.5162e+05/4.027e+05	677.04	277160	8.6751	3469.2	21848	1870.5	1	0	0	0	TRUE
Gm6164_75457	Gm6164	0/1.012/11.088	25.337/7475.9	1.012	3750.6	10.865	51.271	4.4643	1774.6	1	0	0	0	TRUE
Ttll8_61551	Ttll8	695.57/414.93/414.68	93297/2.7914e+05	414.93	186220	8.8064	39380	11397	1740.4	1	0	0	0	TRUE
Pabpc6_31006	Pabpc6	678.52/393.68/331.52	92157/2.6634e+05	393.68	179250	8.8271	42501	10628	1734.9	1	0	0	0	TRUE
Cend1_25864	Cend1	576.91/237.82/206.23	82062/1.7313e+05	237.82	127600	9.0614	57988	5445.6	1725.8	1	0	0	0	TRUE
Slc39a2_54212	Slc39a2	0/0/2.2175	222.97/5304.3	0.65558	2763.6	10.706	2.4587	2.5846	1718.6	1	0	0	0	TRUE
Vmn1r28_51358	Vmn1r28	1199.7/435.17/533.31	1.5898e+05/2.7487e+05	533.31	216930	8.6653	226860	15909	1715.6	1	0	0	0	TRUE
Matn2_10371	Matn2	71.458/1.012/2.2175	7849.5/3497.7	2.2175	5673.6	10.784	2397.9	12.099	1630.5	1	0	0	0	TRUE
Usp10_18415	Usp10	0.65558/0/7.7613	2432.4/2738.6	0.65558	2585.5	10.609	25.461	2.5846	1607.8	1	0	0	0	TRUE
Ifnar2_8341	Ifnar2	163.89/213.54/188.49	33957/1.6441e+05	188.49	99185	9.0319	616.12	4001.8	1564.9	1	0	0	0	TRUE
Fbxo41_71137	Fbxo41	497.58/126.5/178.51	79438/1.1035e+05	178.51	94895	9.0461	52256	3723.6	1552.2	1	0	0	0	TRUE
Fat3_68576	Fat3	924.37/913.85/676.35	1.3001e+05/4.2812e+05	913.85	279060	8.2528	28260	32564	1541.4	1	0	0	0	TRUE
Olfr1242_67107	Olfr1242	474.64/361.29/423.55	1.003e+05/2.3397e+05	423.55	167140	8.6209	3243.1	11713	1540.4	1	0	0	0	TRUE
Gpx7_30465	Gpx7	559.21/467.55/567.69	94422/3.0204e+05	559.21	198230	8.467	4236.3	16943	1518.6	1	0	0	0	TRUE
Hmx3_7711	Hmx3	810.3/492.85/751.74	1.0737e+05/3.7392e+05	751.74	240650	8.3206	35226	25112	1513.9	1	0	0	0	TRUE
Ptger3_13980	Ptger3	2369.3/2094.9/2023.5	2.5475e+05/6.9589e+05	2094.9	475320	7.8252	40191	98333	1509.1	1	0	0	0	TRUE
Tnfaip1_17791	Tnfaip1	545.44/217.58/246.15	80167/1.4656e+05	246.15	113360	8.8414	45197	5699.6	1498.3	1	0	0	0	TRUE
Hook2_51238	Hook2	283.21/423.02/577.67	52413/2.6996e+05	423.02	161190	8.5704	21731	11693	1486.7	1	0	0	0	TRUE
Serpinb11_29577	Serpinb11	0/15.18/2.2175	25.337/10301	2.2175	5163.2	10.648	86.475	12.099	1483.8	1	0	0	0	TRUE
Olfr352_67010	Olfr352	490.37/444.28/439.07	73346/2.5877e+05	444.28	166060	8.5428	1076	12480	1482.5	1	0	0	0	TRUE
Eif4e3_29416	Eif4e3	0/0/12.196	5.0675/4718.1	0.65558	2361.6	10.479	74.376	2.5846	1468.6	1	0	0	0	TRUE
Dmpk_4286	Dmpk	318.61/195.32/143.03	31682/1.5804e+05	195.32	94862	8.9165	8967.5	4195	1461.6	1	0	0	0	TRUE
Gng4_6677	Gng4	144.88/221.63/119.75	35097/1.1815e+05	144.88	76626	9.0369	3261.1	2824.8	1439	1	0	0	0	TRUE
Olfr1447_66164	Olfr1447	291.08/297.53/392.5	54196/1.8968e+05	297.53	121940	8.6741	4530.4	7329.3	1420.9	1	0	0	0	TRUE
Primpol_73763	Primpol	1.3112/3.0361/1.1088	521.95/6553.5	1.3112	3537.7	10.58	1.5081	6.1963	1420.7	1	0	0	0	TRUE
Olfr1018_65728	Olfr1018	646.4/400.76/523.34	1.0345e+05/2.5135e+05	523.34	177400	8.4023	15085	15514	1420.1	1	0	0	0	TRUE
control_78661	control	99.648/53.637/54.329	18608/59836	54.329	39222	9.4694	1027.1	773.88	1408	1	0	0	0	TRUE
LOC100502896_78330	LOC100502896	20.979/22.264/64.308	10221/32921	22.264	21571	9.8568	884.67	239.88	1391.3	1	0	0	0	TRUE
Tbl1xr1_45031	Tbl1xr1	538.89/708.41/401.37	81541/2.7281e+05	538.89	177180	8.3583	23825	16130	1390.8	1	0	0	0	TRUE
Use1_29761	Use1	187.5/67.805/107.55	25641/95948	107.55	60794	9.1295	3985.5	1904.9	1390.5	1	0	0	0	TRUE
Rnf121_41460	Rnf121	149.47/90.07/86.484	24212/83850	90.07	54031	9.2126	1770.7	1507.1	1389.5	1	0	0	0	TRUE
Znrf2_73368	Znrf2	235.35/180.14/241.71	40028/1.6327e+05	235.35	101650	8.7484	1544.5	5370.7	1383.8	1	0	0	0	TRUE
1700017D01Rik_34350	1700017D01Rik	163.24/102.21/114.2	23209/1.0252e+05	114.2	62865	9.092	1274.2	2062.2	1381.8	1	0	0	0	TRUE
Olfr933_65223	Olfr933	306.16/611.26/433.53	66004/2.3816e+05	433.53	152080	8.4512	23906	12081	1379.7	1	0	0	0	TRUE
Ccp110_47160	Ccp110	5.9002/1.012/1.1088	1130/4977.5	1.1088	3053.8	10.5	11.484	5.0105	1363.8	1	0	0	0	TRUE
Clec4a3_39173	Clec4a3	404.49/253/342.61	48364/2.0666e+05	342.61	127510	8.5357	5929.2	8838.1	1352.7	1	0	0	0	TRUE
Rnf122_33544	Rnf122	328.45/437.19/699.63	78698/2.2005e+05	437.19	149370	8.4132	40350	12216	1347.5	1	0	0	0	TRUE
Tek_17398	Tek	91.125/71.853/70.961	31307/58501	71.853	44904	9.2677	186.11	1118.6	1340.5	1	0	0	0	TRUE
Tyr_18304	Tyr	0/0/7.7613	0/4276.1	0.65558	2138	10.335	30.119	2.5846	1329.5	1	0	0	0	TRUE
Dek_49686	Dek	202.57/146.74/154.12	26407/1.2079e+05	154.12	73597	8.8902	1201.2	3065.4	1326.5	1	0	0	0	TRUE
Pp2d1_49825	Pp2d1	363.19/272.23/253.91	52859/1.615e+05	272.23	107180	8.6157	4304.6	6514.2	1324.6	1	0	0	0	TRUE
Gpr149_57962	Gpr149	1.3112/4.0481/1.1088	1155.4/5400.4	1.3112	3277.9	10.47	3.7658	6.1963	1316.3	1	0	0	0	TRUE
Olfr816_66040	Olfr816	14.423/0/0	4048.9/76.873	0.65558	2062.9	10.284	104.01	2.5846	1282.8	1	0	0	0	TRUE
Lyve1_50278	Lyve1	111.45/191.27/70.961	40788/73846	111.45	57317	8.9936	4005.5	1996.7	1280.2	1	0	0	0	TRUE
Ppp2r1a_22270	Ppp2r1a	18.356/3.0361/4.4351	4246.5/9618.8	4.4351	6932.7	10.317	97.878	29.459	1276.5	1	0	0	0	TRUE
Necap2_27579	Necap2	223.55/231.75/176.29	27724/1.5112e+05	223.55	89424	8.6375	1150.3	5016.7	1259.4	1	0	0	0	TRUE
Pln_13275	Pln	346.8/156.86/212.88	36055/1.3557e+05	212.88	85811	8.6482	10536	4701.9	1248.3	1	0	0	0	TRUE
Tnpo1_61324	Tnpo1	9.8337/8.0962/6.6526	2315.8/17633	8.0962	9974.3	10.099	2.5515	64.169	1244.1	1	0	0	0	TRUE
Prkcsh_13669	Prkcsh	444.48/547.5/333.74	57951/2.2095e+05	444.48	139450	8.2902	11439	12488	1243.9	1	0	0	0	TRUE
Taf4a_57869	Taf4a	274.69/351.17/272.76	38401/1.6315e+05	274.69	100780	8.5139	2926.7	6592.2	1237.8	1	0	0	0	TRUE
Sh3bgrl_25261	Sh3bgrl	373.68/283.37/245.04	60728/1.445e+05	283.37	102620	8.4953	4812.9	6869.9	1234.6	1	0	0	0	TRUE
Ppib_13526	Ppib	80.636/117.39/84.266	15081/76662	84.266	45871	9.0714	555.33	1380.2	1232.4	1	0	0	0	TRUE
Adra2a_394	Adra2a	135.05/188.24/166.31	23771/1.194e+05	166.31	71587	8.741	729.02	3390.6	1226.6	1	0	0	0	TRUE
Syt1_17016	Syt1	3.9335/3.0361/7.7613	1277/11031	3.9335	6154.2	10.285	7.729	25.238	1224.2	1	0	0	0	TRUE
Copz1_24821	Copz1	228.14/172.04/171.86	27283/1.1814e+05	172.04	72714	8.715	1573.5	3546.1	1218.2	1	0	0	0	TRUE
Olfr1282_66892	Olfr1282	111.45/136.62/208.45	25535/97677	136.62	61606	8.8062	2896.3	2613.7	1202.4	1	0	0	0	TRUE
control_78983	control	178.97/186.21/202.9	20832/1.3002e+05	186.21	75427	8.6543	165.51	3937.8	1199	1	0	0	0	TRUE
Tlx1_17753	Tlx1	137.67/226.69/261.67	25788/1.4481e+05	226.69	85299	8.5493	4574	5110.3	1190	1	0	0	0	TRUE
Adra2c_403	Adra2c	1.9667/4.0481/33.263	1596.3/10560	4.0481	6078.4	10.234	428.92	26.189	1187	1	0	0	0	TRUE
D930015E06Rik_57980	D930015E06Rik	268.79/282.35/238.38	43524/1.4635e+05	268.79	94936	8.459	554.2	6405.1	1182.9	1	0	0	0	TRUE
Pde6d_12715	Pde6d	676.56/400.76/423.55	68715/1.8772e+05	423.55	128210	8.2384	32267	11713	1180.8	1	0	0	0	TRUE
Lrrc30_61755	Lrrc30	148.82/38.457/51.003	22236/40781	51.003	31509	9.243	4862.4	712.12	1178.8	1	0	0	0	TRUE
Trim56_73093	Trim56	120.63/152.81/322.65	21400/1.083e+05	152.81	64848	8.7197	14940	3031.2	1175.1	1	0	0	0	TRUE
Dip2a_26992	Dip2a	221.59/306.64/196.25	29700/1.3576e+05	221.59	82729	8.5379	3938.2	4958.3	1171.7	1	0	0	0	TRUE
Sfmbt1_23798	Sfmbt1	346.15/258.06/204.01	39369/1.4087e+05	258.06	90120	8.4424	5339.9	6068.5	1153.5	1	0	0	0	TRUE
Glt8d1_42793	Glt8d1	236.66/126.5/120.86	29731/82293	126.5	56012	8.7791	6083.7	2360.7	1150.2	1	0	0	0	TRUE
Park7_25677	Park7	375.65/170.02/207.34	58453/96457	207.34	77455	8.5383	14860	4540.3	1146.4	1	0	0	0	TRUE
Gm14085_72410	Gm14085	243.22/261.1/194.03	40327/1.3056e+05	243.22	85443	8.4507	1369.5	5610	1137.5	1	0	0	0	TRUE
Apc_872	Apc	152.75/70.841/74.287	14478/63161	74.287	38819	9.0102	3084.1	1168.8	1133.3	1	0	0	0	TRUE
Cdk20_48011	Cdk20	312.71/369.39/212.88	47893/1.5327e+05	312.71	100580	8.3247	6589	7829.4	1133.2	1	0	0	0	TRUE
Wdr63_62339	Wdr63	270.1/154.84/174.08	43828/92238	174.08	68033	8.6021	4795.2	3601.6	1130.7	1	0	0	0	TRUE
Arc_1017	Arc	81.947/32.385/41.024	8016.7/43702	41.024	25860	9.2653	874.67	534.79	1116.5	1	0	0	0	TRUE
Slc9a2_57196	Slc9a2	196.67/172.04/140.81	29082/1.032e+05	172.04	66142	8.5783	791	3546.1	1107.8	1	0	0	0	TRUE
Lep_9773	Lep	612.97/169.01/229.51	47269/1.1279e+05	229.51	80031	8.4396	75348	5194.8	1107.2	1	0	0	0	TRUE
Nol4l_70890	Nol4l	283.87/264.14/404.7	45683/1.3845e+05	283.87	92066	8.3363	7494.9	6886	1106.1	1	0	0	0	TRUE
B020031M17Rik_71511	B020031M17Rik	279.93/109.3/108.66	25190/72568	109.3	48879	8.7917	14558	1945.9	1105.6	1	0	0	0	TRUE
Fxyd1_24212	Fxyd1	0.65558/19.228/5.5438	1408.8/12453	5.5438	6931.1	10.049	105.58	39.293	1104.8	1	0	0	0	TRUE
Gm6696_75851	Gm6696	1.9667/14.168/2.2175	4332.7/3344	2.2175	3838.3	10.221	71.442	12.099	1102.9	1	0	0	0	TRUE
Fbxo31_42745	Fbxo31	220.27/539.41/286.06	37499/1.4655e+05	286.06	92024	8.3245	34256	6956.7	1099.9	1	0	0	0	TRUE
Abca2_25	Abca2	243.22/557.62/182.95	35771/1.29e+05	243.22	82387	8.3981	51241	5610	1096.7	1	0	0	0	TRUE
Pex11g_33964	Pex11g	294.35/273.25/374.76	39090/1.4586e+05	294.35	92474	8.2905	3455.5	7225.6	1084.4	1	0	0	0	TRUE
Grik5_6945	Grik5	151.44/135.61/160.77	31489/87482	151.44	59486	8.6082	168.81	2995.1	1084.2	1	0	0	0	TRUE
Smyd1_1691	Smyd1	276/175.08/143.03	33906/97014	175.08	65460	8.5383	5605.9	3629.1	1083.7	1	0	0	0	TRUE
Nalcn_71623	Nalcn	144.23/113.35/168.53	21111/92998	144.23	57054	8.6179	772.18	2807.9	1074	1	0	0	0	TRUE
Ttll8_61552	Ttll8	21.634/3.0361/3.3263	4282/5400.4	3.3263	4841.2	10.128	167.63	20.343	1072.6	1	0	0	0	TRUE
control_78648	control	162.58/114.36/103.11	28474/68917	114.36	48696	8.7216	1226	2065.9	1068.8	1	0	0	0	TRUE
Grrp1_38771	Grrp1	0.65558/6.0721/11.088	1292.2/12809	6.0721	7050.6	9.9616	27.247	44.202	1059.6	1	0	0	0	TRUE
Rsu1_15084	Rsu1	128.49/98.166/125.29	13216/87943	125.29	50580	8.6457	373	2330.9	1045.1	1	0	0	0	TRUE
Tnrc6a_59877	Tnrc6a	169.14/118.41/136.38	24856/82101	136.38	53478	8.6047	698.15	2607.5	1044.6	1	0	0	0	TRUE
Rasl11b_33657	Rasl11b	194.05/479.7/128.62	15957/1.1898e+05	194.05	67469	8.4343	42938	4158.9	1043.2	1	0	0	0	TRUE
Cilp_54043	Cilp	686.39/731.69/343.72	67418/2.4246e+05	686.39	154940	7.8164	59739	22251	1034.1	1	0	0	0	TRUE
Uox_18522	Uox	239.94/86.022/80.94	24648/53071	86.022	38860	8.8027	11859	1418.3	1029.6	1	0	0	0	TRUE
Zscan25_76626	Zscan25	0/0/3.3263	329.38/2978.8	0.65558	1654.1	9.9654	5.5321	2.5846	1028.5	1	0	0	0	TRUE
Nolc1_36133	Nolc1	63.591/6.0721/11.088	13186/7014.7	11.088	10100	9.7068	1390.9	96.558	1026.7	1	0	0	0	TRUE
Zg16_33813	Zg16	798.5/689.18/763.94	91483/2.3869e+05	763.94	165090	7.7537	3391.1	25655	1025.9	1	0	0	0	TRUE
Cox10_35699	Cox10	0/0/77.613	1135.1/2152.5	0.65558	1643.8	9.9563	3011.9	2.5846	1022.1	1	0	0	0	TRUE
Psmb10_13855	Psmb10	354.01/341.05/243.93	42688/1.4958e+05	341.05	96132	8.1347	4800.4	8784.8	1022	1	0	0	0	TRUE
4921507P07Rik_36202	4921507P07Rik	0.65558/1.012/13.305	547.29/3738	1.012	2142.6	10.057	75.624	4.4643	1013.6	1	0	0	0	TRUE
Tyrp1_18316	Tyrp1	94.403/68.817/76.505	15496/55080	76.505	35288	8.8307	189.73	1215	1010.2	1	0	0	0	TRUE
Zscan2_19158	Zscan2	79.981/75.901/69.852	10708/59289	75.901	34998	8.8301	26.617	1202.4	1007.1	1	0	0	0	TRUE
Yif1a_32290	Yif1a	72.114/23.276/27.719	9217.7/26848	27.719	18033	9.2945	995.31	319.65	1007.1	1	0	0	0	TRUE
Spata7_47933	Spata7	35.401/55.661/57.656	11792/45211	55.661	28502	8.9745	207.22	798.95	1006.4	1	0	0	0	TRUE
Npb_52637	Npb	62.28/91.082/95.354	15005/63805	91.082	39405	8.7413	423.89	1529.5	1005.2	1	0	0	0	TRUE
Tctn1_76405	Tctn1	15.078/3.0361/4.4351	2376.6/8542.6	4.4351	5459.6	9.9725	57.618	29.459	1005.1	1	0	0	0	TRUE
Kcnn4_9134	Kcnn4	3.9335/5.0601/80.94	2853/9023	5.0601	5938	9.9367	2879.5	34.922	1004	1	0	0	0	TRUE
Srrm4_33691	Srrm4	78.669/61.733/96.462	14311/56829	78.669	35570	8.8024	301.71	1260.6	999.61	1	0	0	0	TRUE
Spata21_71006	Spata21	0/0/3.3263	263.51/2940.4	0.65558	1602	9.9192	5.5321	2.5846	996.05	1	0	0	0	TRUE
Fam46d_53781	Fam46d	456.28/307.65/350.37	46241/1.4454e+05	350.37	95391	8.0847	6521.2	9104.8	996.03	1	0	0	0	TRUE
Klhl11_55092	Klhl11	326.48/291.46/231.73	34884/1.3351e+05	291.46	84197	8.1694	2396.9	7131.5	993.58	1	0	0	0	TRUE
Calm5_74674	Calm5	48.513/74.889/35.48	12973/38389	48.513	25681	9.0187	432.78	666.72	992.69	1	0	0	0	TRUE
9530002B09Rik_43597	9530002B09Rik	761.13/422.01/300.47	44953/1.7017e+05	422.01	107560	7.9903	64885	11656	992.36	1	0	0	0	TRUE
Foxa2_7723	Foxa2	144.88/152.81/169.64	25165/84330	152.81	54748	8.4755	173.01	3031.2	991.62	1	0	0	0	TRUE
Chmp7_48089	Chmp7	27.534/37.445/92.027	9020.1/33959	37.445	21489	9.1267	1538.7	474.33	984.98	1	0	0	0	TRUE
Rnd3_40330	Rnd3	41.301/30.361/49.894	13424/32306	41.301	22865	9.0783	96.77	539.55	982.58	1	0	0	0	TRUE
Calb2_1927	Calb2	428.09/480.71/409.13	64443/1.5053e+05	428.09	107490	7.9686	1564	11880	982.22	1	0	0	0	TRUE
Gm20854_77469	Gm20854	129.15/58.697/74.287	23538/43674	74.287	33606	8.8021	1626.4	1168.8	980.82	1	0	0	0	TRUE
Psenen_28099	Psenen	530.36/250.98/376.98	46737/1.4983e+05	376.98	98282	8.0225	19701	10034	977.38	1	0	0	0	TRUE
Vmn1r100_77984	Vmn1r100	181.6/100.19/143.03	26771/76364	143.03	51568	8.484	1661.3	2777.1	975.84	1	0	0	0	TRUE
Kynu_36159	Kynu	69.491/266.16/54.329	16059/47931	69.491	31995	8.8262	19454	1070.3	975.83	1	0	0	0	TRUE
Pcnxl2_68561	Pcnxl2	56.38/57.685/70.961	18790/37581	57.685	28186	8.9078	88.975	837.43	972	1	0	0	0	TRUE
Kat2a_6254	Kat2a	83.259/74.889/200.69	8863/62940	83.259	35902	8.735	6929.6	1358.5	971.8	1	0	0	0	TRUE
Plscr4_60549	Plscr4	0/1.012/15.523	709.44/3392	1.012	2050.7	9.994	105.79	4.4643	970.11	1	0	0	0	TRUE
Eya4_5265	Eya4	137.02/15.18/18.849	9770.1/17210	18.849	13490	9.4087	6988.5	192.93	969.86	1	0	0	0	TRUE
Errfi1_40229	Errfi1	150.78/286.4/233.95	19738/1.2188e+05	233.95	70810	8.2355	4833.9	5328.3	966.86	1	0	0	0	TRUE
Cidec_5864	Cidec	564.45/219.61/261.67	43028/1.0937e+05	261.67	76200	8.1804	46724	6181.1	965.89	1	0	0	0	TRUE
Olfr1351_67363	Olfr1351	9.8337/15.18/18.849	1748.3/21544	15.18	11646	9.4915	21.023	145.41	964.51	1	0	0	0	TRUE
Vmn1r63_45071	Vmn1r63	20.979/5.0601/9.9789	4804/12896	9.9789	8849.7	9.6549	72.593	84.191	963.4	1	0	0	0	TRUE
Olfr1022_65740	Olfr1022	273.38/325.87/368.11	28337/1.4747e+05	325.87	87905	8.0711	2269.9	8269.6	963.06	1	0	0	0	TRUE
Dcaf8_46404	Dcaf8	215.03/203.42/159.66	29553/98859	203.42	64206	8.2951	1024.6	4426.9	961.95	1	0	0	0	TRUE
Dnajc5b_28068	Dnajc5b	0/12.144/2.2175	0/6678.4	2.2175	3339.2	10.02	51.728	12.099	959.36	1	0	0	0	TRUE
Aurkb_16832	Aurkb	12.456/3.0361/1.1088	4804/3363.2	3.0361	4083.6	9.983	46.225	18.092	959.34	1	0	0	0	TRUE
Kcnk1_9099	Kcnk1	700.81/353.19/594.3	73205/1.8797e+05	594.3	130590	7.7772	34738	18371	959.09	1	0	0	0	TRUE
Hps6_15100	Hps6	361.88/548.51/286.06	47371/1.3982e+05	361.88	93597	8.0108	20291	9504	956.37	1	0	0	0	TRUE
Amy2a4_78015	Amy2a4	45.891/21.252/12.196	10150/18623	21.252	14386	9.3366	344.52	225.72	956.15	1	0	0	0	TRUE
Sez6l_25313	Sez6l	642.47/725.62/645.3	42070/2.3167e+05	645.3	136870	7.7264	3229.5	20497	951.5	1	0	0	0	TRUE
Vps11_37147	Vps11	241.91/259.08/431.31	25606/1.2324e+05	259.08	74422	8.1607	14979	6100.1	949.55	1	0	0	0	TRUE
Etnk2_53993	Etnk2	1.3112/1.012/1.1088	1292.2/2959.6	1.1088	2125.9	9.9781	0.025162	5.0105	949.24	1	0	0	0	TRUE
Sertad4_54170	Sertad4	182.25/83.998/92.027	24572/50266	92.027	37419	8.6519	4102.4	1550.5	947.96	1	0	0	0	TRUE
Gga2_40092	Gga2	0/4.0481/9.9789	5.0675/9695.7	4.0481	4850.4	9.9084	25.781	26.189	947	1	0	0	0	TRUE
Aldoart2_44665	Aldoart2	598.54/389.63/278.3	65320/1.282e+05	389.63	96758	7.9525	28020	10484	941.19	1	0	0	0	TRUE
Epsti1_49071	Epsti1	79.981/31.373/42.133	12957/31412	42.133	22185	9.0066	774.11	553.87	940.87	1	0	0	0	TRUE
Ccl11_15376	Ccl11	196.02/142.69/104.22	25778/73049	142.69	49414	8.4258	2161.7	2768.4	936.42	1	0	0	0	TRUE
Pitpnc1_37298	Pitpnc1	55.069/79.95/99.789	8031.9/59183	79.95	33607	8.6976	506.33	1287.7	934.31	1	0	0	0	TRUE
Bpnt1_19442	Bpnt1	26.879/28.337/93.136	3861.4/29990	28.337	16926	9.1724	2100.6	329.02	931.57	1	0	0	0	TRUE
Mpdu1_19925	Mpdu1	439.89/254.02/381.41	46246/1.4227e+05	381.41	94259	7.9454	9825	10191	929.94	1	0	0	0	TRUE
Sostdc1_27275	Sostdc1	18.356/3.0361/1.1088	6096.2/1816.1	3.0361	3956.1	9.9373	119.21	18.092	929.38	1	0	0	0	TRUE
Zfx_19283	Zfx	47.202/44.529/48.786	13393/33824	47.202	23609	8.9361	4.8264	643.12	929.09	1	0	0	0	TRUE
Jmjd4_52069	Jmjd4	150.13/86.022/204.01	25662/75595	150.13	50628	8.3881	3506.6	2960.8	927.68	1	0	0	0	TRUE
Poldip2_31591	Poldip2	0/0/0	0/2978.8	0.65558	1489.4	9.8142	0	2.5846	926.05	1	0	0	0	TRUE
Mcidas_75574	Mcidas	205.2/39.469/52.112	18902/31124	52.112	25013	8.8795	11797	732.57	922.22	1	0	0	0	TRUE
control_79610	control	149.47/89.058/70.961	29569/41377	89.058	35473	8.6217	1988.7	1484.8	918.28	1	0	0	0	TRUE
Dnajc13_60569	Dnajc13	26.223/14.168/17.74	6030.3/18459	17.74	12245	9.3519	42.36	178.23	915.86	1	0	0	0	TRUE
Lalba_9623	Lalba	69.491/32.385/37.698	8457.6/31576	37.698	20017	9.0148	519.53	478.55	913.29	1	0	0	0	TRUE
Manbal_34020	Manbal	74.736/10.12/13.305	6303.9/13933	13.305	10119	9.4664	1891.9	122.44	913.25	1	0	0	0	TRUE
Zfp46_19198	Zfp46	1.9667/3.0361/4.4351	2868.2/4900.7	3.0361	3884.4	9.9109	1.5503	18.092	912.52	1	0	0	0	TRUE
Brf1_38312	Brf1	3.9335/5.0601/14.414	3374.9/7399.1	5.0601	5387	9.7962	44.382	34.922	910.73	1	0	0	0	TRUE
Tnfrsf23_44622	Tnfrsf23	2.6223/2.024/9.9789	1819.2/5237	2.6223	3528.1	9.9282	27.238	14.994	910.46	1	0	0	0	TRUE
Purg_41338	Purg	57.691/95.13/65.417	7515/49814	65.417	28664	8.7535	471.27	988.38	909.68	1	0	0	0	TRUE
Maf_10227	Maf	209.79/118.41/65.417	16900/67918	118.41	42409	8.4724	5579	2163.1	909.3	1	0	0	0	TRUE
Rps6kb1_38570	Rps6kb1	108.17/50.601/102.01	17371/59394	102.01	38383	8.5416	1340.2	1776.3	908.29	1	0	0	0	TRUE
Adrb3_417	Adrb3	56.38/45.541/72.07	10008/41829	56.38	25918	8.8193	181.83	812.57	907.27	1	0	0	0	TRUE
Gzf1_40919	Gzf1	39.99/30.361/45.459	10160/31124	39.99	20642	8.9762	61.321	517.15	905.96	1	0	0	0	TRUE
3110043O21Rik_39224	3110043O21Rik	65.558/93.106/241.71	12309/59702	93.106	36005	8.5798	11421	1574.5	905.04	1	0	0	0	TRUE
Mstn_10959	Mstn	136.36/60.721/79.831	26026/38321	79.831	32174	8.6368	1780.4	1285.2	895.24	1	0	0	0	TRUE
Sprr2a2_78205	Sprr2a2	9.8337/1.012/7.7613	5878.3/8042.9	7.7613	6960.6	9.634	24.924	60.747	892.06	1	0	0	0	TRUE
Slc1a6_15978	Slc1a6	214.37/144.72/159.66	19104/82043	159.66	50574	8.2982	1608.4	3212.2	889.51	1	0	0	0	TRUE
Smyd2_57141	Smyd2	1.3112/0/8.8701	1312.5/3094.2	1.3112	2203.3	9.8975	29.428	6.1963	884.61	1	0	0	0	TRUE
Nme6_23482	Nme6	12.456/16.192/64.308	4945.8/17325	16.192	11136	9.3393	1164.6	158.19	884.07	1	0	0	0	TRUE
Cwf19l2_63196	Cwf19l2	79.325/25.3/21.066	11701/18123	25.3	14912	9.1472	1468.3	283.6	883.98	1	0	0	0	TRUE
Smad5_10214	Smad5	0.65558/11.132/0	532.08/2306.2	0.65558	1419.1	9.7445	55.095	2.5846	882.33	1	0	0	0	TRUE
Yy1_19047	Yy1	55.724/37.445/136.38	10201/39676	55.724	24939	8.7803	3419.6	800.15	879.66	1	0	0	0	TRUE
Olfr1448_66153	Olfr1448	9.1781/19.228/17.74	5427.3/18075	17.74	11751	9.2926	37.762	178.23	878.88	1	0	0	0	TRUE
Nkx6-2_7118	Nkx6-2	167.17/40.481/37.698	19089/21236	40.481	20163	8.9251	8029.3	525.5	877.79	1	0	0	0	TRUE
Igsf8_50763	Igsf8	432.03/387.6/365.89	33511/1.4531e+05	387.6	89410	7.846	1222.4	10411	872.47	1	0	0	0	TRUE
Sult1d1_22836	Sult1d1	202.57/317.77/181.84	40950/75019	202.57	57984	8.154	6850.5	4402.6	870.84	1	0	0	0	TRUE
Vmn1r117_76746	Vmn1r117	67.525/199.37/38.807	7996.5/48007	67.525	28002	8.6747	9103.7	1030.6	870.16	1	0	0	0	TRUE
Hsd17b12_24531	Hsd17b12	0.65558/16.192/0	0/2786.7	0.65558	1393.3	9.718	120.91	2.5846	866.28	1	0	0	0	TRUE
Cebpa_2716	Cebpa	487.75/519.17/350.37	37697/1.6863e+05	487.75	103160	7.7216	9930.3	14128	863.83	1	0	0	0	TRUE
Slc16a3_44881	Slc16a3	43.924/0/1.1088	3810.7/0	1.1088	1905.4	9.8202	917.18	5.0105	850.71	1	0	0	0	TRUE
Exph5_69824	Exph5	93.092/67.805/84.266	15055/48315	84.266	31685	8.5377	174.43	1380.2	850.6	1	0	0	0	TRUE
Cidec_5862	Cidec	58.347/42.505/42.133	12552/27790	42.505	20171	8.857	125.55	560.31	850.35	1	0	0	0	TRUE
Laptm4a_11062	Laptm4a	1.9667/1.012/11.088	1312.5/4160.8	1.9667	2736.6	9.8498	42.051	10.379	848.82	1	0	0	0	TRUE
Tom1_17925	Tom1	215.69/92.094/159.66	42734/53792	159.66	48263	8.2308	3852	3212.2	848.74	1	0	0	0	TRUE
Asb15_44539	Asb15	63.591/56.673/133.05	9729.5/42770	63.591	26250	8.6668	2436.3	952.19	848.62	1	0	0	0	TRUE
Eps8l2_46552	Eps8l2	545.44/322.83/200.69	55909/98023	322.83	76966	7.8928	32237	8167.5	848.06	1	0	0	0	TRUE
Olfr1323_65033	Olfr1323	214.37/226.69/118.64	32036/85099	214.37	58568	8.0871	4658.6	4745.6	847.07	1	0	0	0	TRUE
Oas1d_46905	Oas1d	10.489/6.0721/4.4351	2255/9003.8	6.0721	5629.4	9.6369	11.096	44.202	845.81	1	0	0	0	TRUE
Itpk1_55415	Itpk1	1227.2/852.12/810.51	87469/2.0547e+05	852.12	146470	7.4237	71225	29669	845.41	1	0	0	0	TRUE
Kcnc4_46748	Kcnc4	85.881/47.565/76.505	17528/41512	76.505	29520	8.5732	462.71	1215	844.69	1	0	0	0	TRUE
Ston2_49148	Ston2	36.057/87.034/43.242	7241.4/33286	43.242	20264	8.8394	984.68	573.11	844.64	1	0	0	0	TRUE
C87977_46316	C87977	81.947/116.38/98.68	19692/49958	98.68	34825	8.4487	296.67	1700.2	842.2	1	0	0	0	TRUE
Oit3_12115	Oit3	329.76/305.63/233.95	34205/1.1312e+05	305.63	73662	7.9083	2860.1	7595	841.73	1	0	0	0	TRUE
Edem2_49100	Edem2	36.712/10.12/24.393	4124.9/23600	24.393	13863	9.0927	177.74	270.35	841.62	1	0	0	0	TRUE
Foxg1_7547	Foxg1	67.525/70.841/74.287	12167/43693	70.841	27930	8.6028	11.437	1097.8	840.82	1	0	0	0	TRUE
Hemgn_45974	Hemgn	27.534/13.156/11.088	5837.7/12655	13.156	9246.5	9.3515	105.5	120.66	840.59	1	0	0	0	TRUE
Smad4_10210	Smad4	30.157/4.0481/2.2175	4008.4/4602.8	4.0481	4305.6	9.7366	342.5	26.189	840.54	1	0	0	0	TRUE
Fkbp14_59134	Fkbp14	215.69/165.97/95.354	15055/82908	165.97	48982	8.1965	3729.2	3381.3	839.49	1	0	0	0	TRUE
Zmpste24_58461	Zmpste24	51.135/15.18/15.523	7251.5/13270	15.523	10261	9.2786	634.18	149.71	837.34	1	0	0	0	TRUE
Qrich1_34139	Qrich1	5.2446/15.18/4.4351	2067.5/8052.5	5.2446	5060	9.6626	49.686	36.575	835.81	1	0	0	0	TRUE
Sephs1_49324	Sephs1	9.1781/16.192/7.7613	451/14010	9.1781	7230.6	9.4727	25.603	75.518	830.99	1	0	0	0	TRUE
Hps1_51837	Hps1	323.86/279.32/187.38	26797/1.1017e+05	279.32	68483	7.9326	5218	6740	830.76	1	0	0	0	TRUE
Map3k14_23105	Map3k14	402.53/221.63/231.73	24385/96514	231.73	60450	8.0209	14636	5261.5	830.18	1	0	0	0	TRUE
Vmn2r23_74544	Vmn2r23	57.035/82.986/53.221	6557.3/41089	57.035	23823	8.6813	343.98	825.03	827.41	1	0	0	0	TRUE
Bcl6b_1436	Bcl6b	0/6.0721/2.2175	228.04/5525.3	2.2175	2876.7	9.8047	9.8876	12.099	826.39	1	0	0	0	TRUE
Ier3ip1_27706	Ier3ip1	597.89/200.38/246.15	30177/95092	246.15	62635	7.9855	62909	5699.6	826.38	1	0	0	0	TRUE
Noto_73099	Noto	87.848/85.01/94.245	14787/48488	87.848	31637	8.4761	24.49	1458.2	826.2	1	0	0	0	TRUE
Ssc5d_68453	Ssc5d	22.29/118.41/22.175	2396.9/23129	22.29	12763	9.0982	4619.2	240.24	822	1	0	0	0	TRUE
Mettl8_57561	Mettl8	22.29/182.16/33.263	3070.9/30096	33.263	16583	8.919	11146	406.02	821.35	1	0	0	0	TRUE
Mageb16_37704	Mageb16	27.534/157.87/29.937	4733/26118	29.937	15425	8.9619	8187	353.59	818.73	1	0	0	0	TRUE
Ddx39b_23087	Ddx39b	102.27/68.817/56.547	11873/41483	68.817	26678	8.5779	634.83	1056.7	818.58	1	0	0	0	TRUE
Cyba_3783	Cyba	1.3112/1.012/2.2175	405.4/3670.7	1.3112	2038	9.7851	0.45549	6.1963	818.22	1	0	0	0	TRUE
Rce1_14556	Rce1	35.401/40.481/14.414	18537/15682	35.401	17109	8.8767	233.13	440.63	813.4	1	0	0	0	TRUE
Fgf3_5549	Fgf3	95.059/32.385/13.305	13074/19199	32.385	16137	8.917	2146	392	813.38	1	0	0	0	TRUE
Sfmbt1_23795	Sfmbt1	19.667/13.156/13.305	0/18008	13.305	9003.8	9.298	20.25	122.44	812.5	1	0	0	0	TRUE
Dnajc6_38768	Dnajc6	0.65558/7.0841/6.6526	1206.1/10263	6.6526	5734.3	9.5497	18.075	49.746	812.08	1	0	0	0	TRUE
Phf21a_51844	Phf21a	409.08/130.55/134.16	31585/50535	134.16	41060	8.247	37797	2551.6	810.21	1	0	0	0	TRUE
Vcl_18679	Vcl	426.13/548.51/376.98	51810/1.25e+05	426.13	88403	7.6933	8697.1	11807	809.64	1	0	0	0	TRUE
Kcnh1_9046	Kcnh1	0/2.024/3.3263	0/5313.9	2.024	2656.9	9.7796	2.8963	10.767	809.1	1	0	0	0	TRUE
Slc22a27_51644	Slc22a27	197.33/119.42/271.65	13292/92536	197.33	52914	8.0596	5796.6	4252.2	808.43	1	0	0	0	TRUE
Olfr521_64920	Olfr521	92.437/65.781/226.19	11787/52245	92.437	32016	8.4206	9299.9	1559.6	808.36	1	0	0	0	TRUE
Agpat3_21380	Agpat3	86.536/32.385/39.915	11838/24945	39.915	18391	8.8123	1115.1	515.87	807.98	1	0	0	0	TRUE
Gm11487_74131	Gm11487	63.591/77.925/68.743	11432/41175	68.743	26304	8.5591	55.428	1055.2	807.65	1	0	0	0	TRUE
Clip1_24769	Clip1	135.7/118.41/221.75	17153/65112	135.7	41133	8.2331	3851.7	2590.5	805.49	1	0	0	0	TRUE
Prps2_49927	Prps2	53.757/136.62/82.048	11680/47277	82.048	29479	8.4716	1889.4	1332.5	805.31	1	0	0	0	TRUE
Zcchc10_32009	Zcchc10	37.368/194.31/80.94	9942.4/48478	80.94	29210	8.4777	7375.4	1308.8	805.18	1	0	0	0	TRUE
Msantd2_60407	Msantd2	56.38/33.397/13.305	9562.3/23014	33.397	16288	8.8874	465.95	408.16	804.57	1	0	0	0	TRUE
Scn5a_15319	Scn5a	165.86/157.87/110.88	12202/78507	157.87	45355	8.1572	1136.3	3164.7	803.41	1	0	0	0	TRUE
Arhgef6_39365	Arhgef6	100.96/114.36/144.14	11939/61268	114.36	36603	8.3098	533.22	2065.9	802.81	1	0	0	0	TRUE
Ptbp2_24237	Ptbp2	71.458/34.409/43.242	15750/22735	43.242	19242	8.7647	437.09	573.11	801.98	1	0	0	0	TRUE
Tal2_17083	Tal2	24.256/6.0721/2.2175	6273.5/4381.8	6.0721	5327.6	9.5574	172.76	44.202	800.43	1	0	0	0	TRUE
Efna1_4705	Efna1	14.423/1.012/1.1088	2366.5/1201.1	1.1088	1783.8	9.7252	88.636	5.0105	796.42	1	0	0	0	TRUE
Nipal2_55895	Nipal2	106.2/104.24/116.42	5842.8/63209	106.2	34526	8.3312	54.119	1873.5	795.21	1	0	0	0	TRUE
Ppp1r3g_42803	Ppp1r3g	0.65558/5.0601/2.2175	846.27/4689.3	2.2175	2767.8	9.7491	5.2599	12.099	795.08	1	0	0	0	TRUE
Olfr346_67001	Olfr346	6.5558/10.12/9.9789	1429/13165	9.9789	7296.8	9.3766	5.8687	84.191	794.15	1	0	0	0	TRUE
Zfp180_52953	Zfp180	59.002/50.601/226.19	6197.5/40445	59.002	23321	8.6025	14011	862.71	791.99	1	0	0	0	TRUE
Cby1_39748	Cby1	154.06/103.23/57.656	26209/41185	103.23	33697	8.3368	2330.4	1804.4	790.85	1	0	0	0	TRUE
Fn1_5776	Fn1	478.57/265.15/213.99	36278/89173	265.15	62726	7.8807	24083	6290.4	787.53	1	0	0	0	TRUE
Pdlim2_53654	Pdlim2	1740.6/1580.8/1296.1	79782/3.3238e+05	1580.8	206080	7.0255	53273	67561	786.77	1	0	0	0	TRUE
Panx3_52354	Panx3	123.9/157.87/189.6	14042/74740	157.87	44391	8.1263	1080.2	3164.7	786.29	1	0	0	0	TRUE
Bend3_71400	Bend3	2.6223/17.204/3.3263	826/6255.6	3.3263	3540.8	9.6771	96.548	20.343	784.31	1	0	0	0	TRUE
Gbx1_58711	Gbx1	756.54/723.59/992.34	76250/1.7391e+05	756.54	125080	7.3673	28345	25325	781.22	1	0	0	0	TRUE
Cib1_19784	Cib1	0/30.361/7.7613	152.02/11992	7.7613	6072.1	9.4371	285.48	60.747	778.08	1	0	0	0	TRUE
Isg15_77182	Isg15	78.669/89.058/167.42	14721/45403	89.058	30062	8.3829	3124.5	1484.8	777.86	1	0	0	0	TRUE
Lime1_38787	Lime1	0.65558/65.781/15.523	1596.3/17460	15.523	9528.1	9.1717	1373.5	149.71	777.45	1	0	0	0	TRUE
Pggt1b_56620	Pggt1b	291.73/102.21/170.75	30126/62306	170.75	46216	8.072	9667	3510.8	777.11	1	0	0	0	TRUE
Esx1_5168	Esx1	53.102/51.613/42.133	3770.2/38081	51.613	20926	8.6357	46.043	723.35	776.13	1	0	0	0	TRUE
Cebpb_2725	Cebpb	19.012/24.288/43.242	4849.6/20602	24.288	12726	8.9752	193.54	268.83	774.67	1	0	0	0	TRUE
Rrp8_47230	Rrp8	0/11.132/4.4351	1251.7/7158.8	4.4351	4205.2	9.596	32.261	29.459	773.97	1	0	0	0	TRUE
Gm13119_74149	Gm13119	11.8/11.132/6.6526	6450.9/8802	11.132	7626.4	9.2962	10.257	97.064	772.96	1	0	0	0	TRUE
Hilpda_34638	Hilpda	42.613/11.132/4.4351	2984.7/12261	11.132	7623	9.2956	517.93	97.064	772.62	1	0	0	0	TRUE
Pgr_12911	Pgr	338.28/245.92/158.55	44472/72415	245.92	58443	7.8869	8081.5	5692.7	771.33	1	0	0	0	TRUE
Larp1b_53925	Larp1b	108.83/58.697/97.571	18983/44279	97.571	31631	8.326	818.93	1675	770.48	1	0	0	0	TRUE
Gm7325_76369	Gm7325	107.51/80.962/29.937	8776.8/47027	80.962	27902	8.4113	1654.3	1309.3	768.88	1	0	0	0	TRUE
Arrb2_54928	Arrb2	265.51/307.65/204.01	26969/95294	265.51	61132	7.8416	2779	6301.7	766.74	1	0	0	0	TRUE
Vmn1r234_51436	Vmn1r234	0/1.012/0	790.52/1672	0.65558	1231.3	9.5398	0.51209	2.5846	765.46	1	0	0	0	TRUE
Tnnc2_17786	Tnnc2	0/14.168/0	20.27/2440.7	0.65558	1230.5	9.5389	100.37	2.5846	764.99	1	0	0	0	TRUE
Glrx3_21703	Glrx3	5.2446/8.0962/8.8701	2224.6/10042	8.0962	6133.1	9.3974	4.3651	64.169	764.62	1	0	0	0	TRUE
Slc22a29_60693	Slc22a29	392.69/178.12/199.58	30982/69695	199.58	50339	7.9714	18877	4316.5	763.15	1	0	0	0	TRUE
Abi3bp_70282	Abi3bp	82.603/48.577/113.09	12111/43962	82.603	28037	8.3896	1043.7	1344.4	762.39	1	0	0	0	TRUE
Rasl11a_33588	Rasl11a	34.746/14.168/4.4351	7241.4/10359	14.168	8800	9.1805	259.08	132.9	762.13	1	0	0	0	TRUE
Creb3l1_20271	Creb3l1	7.2114/9.1082/29.937	826/12367	9.1082	6596.5	9.3503	218.71	74.771	761.81	1	0	0	0	TRUE
Atp2b2_1243	Atp2b2	83.914/67.805/57.656	10723/38456	67.805	24589	8.4814	181.25	1036.2	761.77	1	0	0	0	TRUE
Mpp2_22253	Mpp2	220.93/151.8/161.88	23574/63478	161.88	43526	8.062	1794.3	3271.4	758.16	1	0	0	0	TRUE
Mtmr4_51099	Mtmr4	224.21/212.52/208.45	21826/82283	212.52	52054	7.9295	76.567	4691.4	756.88	1	0	0	0	TRUE
Mafk_10234	Mafk	38.679/218.6/93.136	7930.6/52303	93.136	30117	8.3216	9352.9	1575.2	756.48	1	0	0	0	TRUE
Apoa5_27486	Apoa5	204.54/247.94/286.06	20918/94016	247.94	57467	7.8508	1668.4	5755	754.26	1	0	0	0	TRUE
Atad2b_70358	Atad2b	32.779/40.481/85.375	4895.2/29664	40.481	17279	8.7025	1037.4	525.5	752.01	1	0	0	0	TRUE
Crct1_40274	Crct1	63.591/8.0962/13.305	2173.9/14481	13.305	8327.5	9.1854	1277.9	122.44	751.38	1	0	0	0	TRUE
Dffa_4184	Dffa	159.31/106.26/75.396	16961/48286	106.26	32623	8.2487	1883.2	1874.8	750.99	1	0	0	0	TRUE
Eef1d_28875	Eef1d	462.18/321.82/323.76	27542/1.0891e+05	323.76	68226	7.7148	9582.5	8198.6	749.92	1	0	0	0	TRUE
Adam17_249	Adam17	50.48/89.058/29.937	8776.8/31076	50.48	19926	8.5965	955.14	702.52	749.89	1	0	0	0	TRUE
Gm5168_72913	Gm5168	3.9335/29.349/17.74	2300.6/17739	17.74	10020	9.0626	162.69	178.23	749.18	1	0	0	0	TRUE
Lrig3_70044	Lrig3	0.65558/13.156/21.066	1758.4/14712	13.156	8235	9.1844	109.42	120.66	748.51	1	0	0	0	TRUE
Slc25a4_740	Slc25a4	361.22/211.51/311.56	19880/1.1281e+05	311.56	66346	7.7297	6238.2	7791.3	748.11	1	0	0	0	TRUE
Sipa1_15851	Sipa1	0/4.0481/1.1088	0/3344	1.1088	1672	9.6318	4.9345	5.0105	746.46	1	0	0	0	TRUE
Taok1_54967	Taok1	34.09/141.68/23.284	8219.4/22418	34.09	15319	8.7701	5846.5	419.32	746.42	1	0	0	0	TRUE
Dlg1_4240	Dlg1	11.8/11.132/12.196	3623.2/11666	11.8	7644.4	9.2223	0.30165	104.72	745.87	1	0	0	0	TRUE
Art5_1116	Art5	158.65/254.02/119.75	20255/64237	158.65	42246	8.0478	5304.2	3185.3	745.72	1	0	0	0	TRUE
Plxna4_62821	Plxna4	1.9667/0/2.2175	608.1/4199.2	1.9667	2403.7	9.6627	1.9655	10.379	745.47	1	0	0	0	TRUE
Olfr1447_66162	Olfr1447	85.225/23.276/35.48	14452/16960	35.48	15706	8.7501	1311.7	441.92	745.45	1	0	0	0	TRUE
Krt27_9518	Krt27	323.2/212.52/160.77	17508/84983	212.52	51246	7.9069	7463.8	4691.4	745.08	1	0	0	0	TRUE
Plek2_20890	Plek2	39.335/33.397/31.045	9156.9/20967	33.397	15062	8.7745	20.395	408.16	743.88	1	0	0	0	TRUE
D330045A20Rik_47441	D330045A20Rik	36.057/1.012/2.2175	3162.1/2008.3	2.2175	2585.2	9.6507	573.28	12.099	742.6	1	0	0	0	TRUE
Endog_4931	Endog	103.58/127.51/86.484	14316/49045	103.58	31680	8.2429	432.56	1812.6	741.68	1	0	0	0	TRUE
Hist3h2ba_44096	Hist3h2ba	0/0/1.1088	248.31/2123.6	0.65558	1186	9.4857	0.61468	2.5846	737.29	1	0	0	0	TRUE
Rab9_24648	Rab9	2.6223/3.0361/19.958	4976.2/1297.2	3.0361	3136.7	9.6026	143.26	18.092	736.74	1	0	0	0	TRUE
Olfr631_67077	Olfr631	127.84/73.877/267.21	13642/58693	127.84	36167	8.133	11168	2393.8	736.61	1	0	0	0	TRUE
Nppa_58629	Nppa	215.03/64.769/93.136	11072/47527	93.136	29300	8.282	7831.4	1575.2	735.89	1	0	0	0	TRUE
Ppy_13607	Ppy	35.401/42.505/32.154	6126.6/24830	35.401	15478	8.7321	30.502	440.63	735.69	1	0	0	0	TRUE
Cracr2a_72637	Cracr2a	0.65558/2.024/41.024	172.29/4650.8	2.024	2411.6	9.6399	761.44	10.767	734.33	1	0	0	0	TRUE
Mff_42105	Mff	62.936/32.385/72.07	11544/33555	62.936	22549	8.4623	508.4	939.27	733.71	1	0	0	0	TRUE
Nat8l_68381	Nat8l	91.125/240.86/147.47	9613/69417	147.47	39515	8.0562	5948.4	2891.6	732.1	1	0	0	0	TRUE
Sh3tc2_56653	Sh3tc2	542.82/382.54/474.55	45389/1.2623e+05	474.55	85808	7.4954	6563	13622	731.12	1	0	0	0	TRUE
Tlr2_19958	Tlr2	22.945/29.349/22.175	324.32/22793	22.945	11559	8.9151	20.798	249.53	730.26	1	0	0	0	TRUE
Iqcf4_30496	Iqcf4	5.2446/12.144/13.305	70.944/15144	12.144	7607.5	9.177	24.476	108.71	728.48	1	0	0	0	TRUE
Vps41_55484	Vps41	91.125/76.913/123.07	17336/39772	91.125	28554	8.2759	611.3	1530.4	727.56	1	0	0	0	TRUE
Cd55_3981	Cd55	263.54/169.01/215.1	23751/77094	215.1	50423	7.8663	2235.6	4766.9	727.2	1	0	0	0	TRUE
Obscn_71937	Obscn	47.202/33.397/14.414	12927/16489	33.397	14708	8.7402	275.46	408.16	726.37	1	0	0	0	TRUE
Acat2_49872	Acat2	19.667/44.529/27.719	6400.2/19574	27.719	12987	8.821	173.7	319.65	724.85	1	0	0	0	TRUE
Pan3_38663	Pan3	43.268/67.805/90.919	8579.2/38129	67.805	23354	8.407	568.15	1036.2	723.4	1	0	0	0	TRUE
Ppp2r2a_37730	Ppp2r2a	63.591/42.505/79.831	10713/34016	63.591	22365	8.4357	354.18	952.19	722.71	1	0	0	0	TRUE
Abo_44961	Abo	202.57/294.5/128.62	25145/71060	202.57	48102	7.8844	6959.8	4402.6	721.9	1	0	0	0	TRUE
Anks1b_43622	Anks1b	0.65558/13.156/0	476.34/1845	0.65558	1160.7	9.4546	78.348	2.5846	721.54	1	0	0	0	TRUE
Rnf130_26488	Rnf130	2.6223/11.132/3.3263	288.85/6217.1	3.3263	3253	9.5549	30.714	20.343	720.5	1	0	0	0	TRUE
Arhgef19_53853	Arhgef19	4.5891/2.024/64.308	456.07/7543.2	4.5891	3999.6	9.4834	1786.5	30.785	720.04	1	0	0	0	TRUE
D17H6S53E_50304	D17H6S53E	43.924/32.385/21.066	7930.6/20640	32.385	14286	8.7413	130.63	392	719.89	1	0	0	0	TRUE
Iah1_31416	Iah1	0/3.0361/0	0/2315.8	0.65558	1157.9	9.4512	4.6088	2.5846	719.84	1	0	0	0	TRUE
Timm8b_21618	Timm8b	116.69/57.685/77.613	10601/40195	77.613	25398	8.3358	962.18	1238.3	719.55	1	0	0	0	TRUE
Glis2_45187	Glis2	1.3112/13.156/9.9789	3557.4/9666.8	9.9789	6612.1	9.2345	42.612	84.191	719.53	1	0	0	0	TRUE
Bmp6_1641	Bmp6	0.65558/1.012/0	369.92/1941.1	0.65558	1155.5	9.4482	0.27842	2.5846	718.33	1	0	0	0	TRUE
Asb14_50885	Asb14	111.45/68.817/34.372	7175.5/39657	68.817	23416	8.3898	1502	1056.7	718.25	1	0	0	0	TRUE
Dgke_24118	Dgke	240.6/77.925/84.266	17767/35727	84.266	26747	8.2932	12240	1380.2	717.67	1	0	0	0	TRUE
Oip5_36015	Oip5	1.9667/1.012/0	1783.7/1249.2	1.012	1516.5	9.5588	0.96783	4.4643	717.24	1	0	0	0	TRUE
Dpp8_40683	Dpp8	101.61/9.1082/7.7613	5204.3/7197.3	9.1082	6200.8	9.261	4279.6	74.771	716.04	1	0	0	0	TRUE
Blm_1604	Blm	5.2446/25.3/28.828	790.52/23312	25.3	12051	8.84	207.34	283.6	714.11	1	0	0	0	TRUE
Mylk4_61274	Mylk4	33.435/4.0481/7.7613	3364.8/7764.2	7.7613	5564.5	9.3111	336.45	60.747	712.95	1	0	0	0	TRUE
Fads2_24905	Fads2	41.301/19.228/16.631	3121.6/16960	19.228	10041	8.9554	246.98	198.02	712.17	1	0	0	0	TRUE
Slc22a12_16009	Slc22a12	0.65558/1.012/1.1088	942.55/2066	1.012	1504.3	9.5472	0.068205	4.4643	711.46	1	0	0	0	TRUE
Cdc34_54583	Cdc34	167.83/37.445/74.287	16930/31864	74.287	24397	8.3402	5053.6	1168.8	711.46	1	0	0	0	TRUE
St8sia4_15813	St8sia4	9.1781/46.553/51.003	3055.7/32710	46.553	17883	8.5549	708.34	631.51	709.76	1	0	0	0	TRUE
Sh3kbp1_26074	Sh3kbp1	22.29/99.178/89.81	10206/44894	89.81	27550	8.245	2323.4	1501.3	708.7	1	0	0	0	TRUE
Gm15097_74427	Gm15097	0/0/38.807	0/2277.4	0.65558	1138.7	9.4271	752.98	2.5846	707.88	1	0	0	0	TRUE
Fam134b_27933	Fam134b	61.624/228.72/75.396	7444.1/41521	75.396	24483	8.3241	11848	1191.8	706.98	1	0	0	0	TRUE
Mnda_72307	Mnda	68.18/53.637/38.807	6962.7/32047	53.637	19505	8.4798	215.72	760.92	705.13	1	0	0	0	TRUE
Kcnk4_9112	Kcnk4	270.75/399.75/210.66	20848/93094	270.75	56971	7.7118	10125	6467.3	705.05	1	0	0	0	TRUE
Prr22_78522	Prr22	0/2.024/0	0/2267.8	0.65558	1133.9	9.421	2.0484	2.5846	704.89	1	0	0	0	TRUE
Vsx2_2873	Vsx2	11.145/37.445/38.807	4444.2/26329	37.445	15387	8.6448	346.77	474.33	704.77	1	0	0	0	TRUE
Dctpp1_28341	Dctpp1	336.97/169.01/129.73	16089/67187	169.01	41638	7.9362	14877	3463.4	704.65	1	0	0	0	TRUE
Olfr994_65192	Olfr994	43.924/56.673/188.49	8026.9/32364	56.673	20195	8.452	8769.1	818.14	704.07	1	0	0	0	TRUE
Lce3c_46004	Lce3c	76.703/22.264/17.74	6217.8/15634	22.264	10926	8.8755	1492	239.88	704	1	0	0	0	TRUE
Ifna9_8328	Ifna9	145.54/65.781/41.024	17751/26800	65.781	22276	8.3819	3487.1	995.64	703.87	1	0	0	0	TRUE
Rbm43_37039	Rbm43	0/1.012/4.4351	111.48/2863.5	1.012	1487.5	9.531	6.3707	4.4643	703.54	1	0	0	0	TRUE
Ism2_55391	Ism2	0.65558/0/0	5.0675/2258.2	0.65558	1131.6	9.4181	0.21489	2.5846	703.48	1	0	0	0	TRUE
control_79179	control	0/11.132/7.7613	932.41/10042	7.7613	5487	9.2909	35.801	60.747	703	1	0	0	0	TRUE
Olfr1052_67256	Olfr1052	15.734/0/1.1088	2407/739.91	1.1088	1573.5	9.5443	107.56	5.0105	702.44	1	0	0	0	TRUE
Ppm1b_13545	Ppm1b	13.767/24.288/16.631	1976.3/16038	16.631	9007	8.9969	33.417	163.82	702.41	1	0	0	0	TRUE
Oas1g_19721	Oas1g	0.65558/4.0481/1.1088	1145.2/1998.7	1.1088	1572	9.5429	4.4225	5.0105	701.78	1	0	0	0	TRUE
Rgs14_22263	Rgs14	3.2779/0/0	1084.4/1172.3	0.65558	1128.4	9.414	5.3723	2.5846	701.47	1	0	0	0	TRUE
Plxnb2_50766	Plxnb2	1.3112/5.0601/12.196	2898.6/5381.1	5.0601	4139.9	9.4164	32.491	34.922	699.69	1	0	0	0	TRUE
2610008E11Rik_38045	2610008E11Rik	62.936/43.517/39.915	7560.7/26147	43.517	16854	8.5646	195.03	577.91	699.26	1	0	0	0	TRUE
Vmn1r2_78214	Vmn1r2	12.456/52.625/45.459	6613/27992	45.459	17302	8.5409	570.28	612.07	697.52	1	0	0	0	TRUE
Cdk2ap2_22355	Cdk2ap2	34.746/0/1.1088	2726.3/393.98	1.1088	1560.1	9.532	566.34	5.0105	696.49	1	0	0	0	TRUE
Olfr677_64926	Olfr677	29.501/28.337/59.873	4170.5/21765	29.501	12968	8.732	461.91	346.86	694.7	1	0	0	0	TRUE
Tyrobp_18311	Tyrobp	13.767/37.445/21.066	4616.5/16172	21.066	10394	8.8799	160.76	223.14	694.43	1	0	0	0	TRUE
Pgr15l_63425	Pgr15l	40.646/185.2/70.961	6207.6/39984	70.961	23096	8.3263	6984.7	1100.3	694.14	1	0	0	0	TRUE
Tmem39b_58520	Tmem39b	1.9667/0/1.1088	1398.6/1700.8	1.1088	1549.7	9.5223	0.98274	5.0105	691.83	1	0	0	0	TRUE
Ppara_13483	Ppara	171.76/80.962/120.86	16829/48536	120.86	32682	8.0673	2091.5	2222.4	690.71	1	0	0	0	TRUE
Mc2r_10431	Mc2r	9.8337/16.192/18.849	2143.5/15231	16.192	8687	8.9811	23.745	158.19	689.39	1	0	0	0	TRUE
4930564B18Rik_41492	4930564B18Rik	340.25/143.71/334.85	26123/1.0217e+05	334.85	64149	7.5775	18282	8573.3	689.19	1	0	0	0	TRUE
Mphosph9_68406	Mphosph9	75.392/44.529/51.003	11909/24907	51.003	18408	8.4676	318.36	712.12	687.89	1	0	0	0	TRUE
Gdf15_19563	Gdf15	66.213/150.79/63.199	10338/33382	66.213	21860	8.3454	3581.2	1004.3	687.71	1	0	0	0	TRUE
H2afv_43693	H2afv	169.14/51.613/45.459	7707.6/29318	51.613	18513	8.459	6925.2	723.35	686.41	1	0	0	0	TRUE
H2-Ke6_7234	H2-Ke6	11.145/20.24/72.07	3035.4/16979	20.24	10007	8.8802	1384.5	211.76	686.31	1	0	0	0	TRUE
Med1_13488	Med1	1413.4/1584.8/1377.1	50431/2.8346e+05	1413.4	166950	6.883	15348	58203	686.14	1	0	0	0	TRUE
Cxxc5_30645	Cxxc5	0/3.0361/17.74	5.0675/5832.8	3.0361	2918.9	9.4988	112.71	18.092	685.53	1	0	0	0	TRUE
Fam57a_50548	Fam57a	64.247/38.457/23.284	9602.8/20852	38.457	15227	8.5923	447.67	491.24	685.3	1	0	0	0	TRUE
Ism1_69730	Ism1	51.791/30.361/48.786	8614.7/26992	48.786	17803	8.4823	174.26	671.66	685.07	1	0	0	0	TRUE
Oas1d_46907	Oas1d	39.335/100.19/33.263	6476.2/24398	39.335	15437	8.5802	1870.1	506.03	684.48	1	0	0	0	TRUE
Igf2bp2_69648	Igf2bp2	19.667/7.0841/6.6526	1388.5/8667.5	7.0841	5028	9.281	79.262	53.966	683.47	1	0	0	0	TRUE
Col9a2_3243	Col9a2	19.667/8.0962/21.066	5893.5/13664	19.667	9778.8	8.8863	67.925	203.95	683.36	1	0	0	0	TRUE
Cftr_2782	Cftr	12.456/17.204/29.937	2584.4/15317	17.204	8950.7	8.9417	92.329	171.23	682.7	1	0	0	0	TRUE
2810408A11Rik_35746	2810408A11Rik	85.881/79.95/52.112	9293.7/39859	79.95	24576	8.2461	405.06	1287.7	682.64	1	0	0	0	TRUE
Gm973_72264	Gm973	5.9002/243.9/14.414	699.31/15231	14.414	7964.9	9.0135	26367	135.91	681.98	1	0	0	0	TRUE
Dcx_4086	Dcx	30.812/44.529/62.091	6374.9/26992	44.529	16684	8.5175	248.28	595.65	681.76	1	0	0	0	TRUE
Mocs2_10823	Mocs2	3.9335/11.132/9.9789	1712.8/10810	9.9789	6261.6	9.1559	18.938	84.191	681.33	1	0	0	0	TRUE
Mov10_10850	Mov10	0/0/0	0/2190.9	0.65558	1095.4	9.3713	0	2.5846	680.98	1	0	0	0	TRUE
Klhl25_52323	Klhl25	37.368/9.1082/8.8701	4763.4/7024.3	9.1082	5893.9	9.1878	399.34	74.771	680.55	1	0	0	0	TRUE
Loh12cr1_31517	Loh12cr1	5.2446/0/2.2175	597.96/4131.9	2.2175	2365	9.5223	7.0404	12.099	679.28	1	0	0	0	TRUE
Pcdhac1_71755	Pcdhac1	25.568/102.21/55.438	5153.6/33219	55.438	19186	8.4093	1540.1	794.74	678.61	1	0	0	0	TRUE
Crygb_3543	Crygb	46.546/57.685/97.571	7069.1/32306	57.685	19688	8.3901	857.49	837.43	678.33	1	0	0	0	TRUE
Lpar5_72633	Lpar5	0/9.1082/1.1088	0/3036.5	1.1088	1518.2	9.4927	32.61	5.0105	677.77	1	0	0	0	TRUE
Casc3_51725	Casc3	6.5558/43.517/69.852	2792.2/29875	43.517	16334	8.5194	1029.8	577.91	677.63	1	0	0	0	TRUE
Lrrc69_39325	Lrrc69	198.64/13.156/48.786	12400/22783	48.786	17592	8.465	11863	671.66	676.91	1	0	0	0	TRUE
Hbb-bh1_7379	Hbb-bh1	290.42/196.33/259.45	22307/83907	259.45	53107	7.6718	2471.6	6111.7	676	1	0	0	0	TRUE
Pcdhb21_45950	Pcdhb21	7.8669/12.144/2.2175	1880/8763.6	7.8669	5321.8	9.2295	25.106	61.822	675.84	1	0	0	0	TRUE
Faim_19527	Faim	218.31/98.166/22.175	23229/32412	98.166	27820	8.1321	10104	1688.5	674.65	1	0	0	0	TRUE
Ercc4_21874	Ercc4	398.59/345.1/277.19	28763/99071	345.1	63917	7.5289	3736.5	8923.4	672.97	1	0	0	0	TRUE
Mapk11_13685	Mapk11	332.38/63.757/129.73	19348/47335	129.73	33341	7.9947	22710	2440.6	672.26	1	0	0	0	TRUE
Slc35a3_58162	Slc35a3	174.38/194.31/313.78	12415/74750	194.31	43583	7.8019	7335.3	4166.2	672.2	1	0	0	0	TRUE
Llph_27808	Llph	15.078/13.156/21.066	4773.5/11387	15.078	8080.2	8.9733	19.776	144.14	671.77	1	0	0	0	TRUE
Ube2d2b_39333	Ube2d2b	314.02/119.42/124.18	13814/50900	124.18	32357	8.014	18031	2303.6	671.57	1	0	0	0	TRUE
Olfr695_65772	Olfr695	10.489/5.0601/15.523	1342.9/11377	10.489	6360.1	9.1128	27.406	89.834	669.92	1	0	0	0	TRUE
Ammecr1l_56580	Ammecr1l	55.069/8.0962/5.5438	3851.3/6880.2	8.0962	5365.7	9.2046	1106.5	64.169	668.82	1	0	0	0	TRUE
Tgfbr3_17550	Tgfbr3	55.724/33.397/22.175	5138.4/21938	33.397	13538	8.6206	312.22	408.16	668.45	1	0	0	0	TRUE
Cdc42ep4_25198	Cdc42ep4	13.112/19.228/22.175	1956/16864	19.228	9410.1	8.8618	23.05	198.02	667.34	1	0	0	0	TRUE
Ikbkb_8443	Ikbkb	97.026/81.974/65.417	13657/35064	81.974	24360	8.1977	250.34	1330.9	665.5	1	0	0	0	TRUE
Acsl4_22063	Acsl4	3.9335/15.18/0	1413.8/5275.4	3.9335	3344.6	9.4055	70.982	25.238	664.97	1	0	0	0	TRUE
Galt_6133	Galt	148.16/163.95/151.9	14762/58414	151.9	36588	7.9027	79.553	3007.2	664.43	1	0	0	0	TRUE
Fgf17_5541	Fgf17	15.734/16.192/17.74	1449.3/15279	16.192	8363.9	8.9264	1.3031	158.19	663.7	1	0	0	0	TRUE
Myg1_26601	Myg1	40.646/24.288/13.305	831.06/20929	24.288	10880	8.7491	194.1	268.83	662.09	1	0	0	0	TRUE
Phkg2_33700	Phkg2	48.513/35.421/21.066	8771.8/19093	35.421	13933	8.5796	188.72	440.94	661.81	1	0	0	0	TRUE
Cyp4f17_52445	Cyp4f17	87.848/103.23/107.55	14311/42040	103.23	28175	8.0786	127.6	1804.4	660.86	1	0	0	0	TRUE
Gzf1_40920	Gzf1	7.2114/16.192/9.9789	2478/9657.2	9.9789	6067.6	9.1105	23.133	84.191	660.19	1	0	0	0	TRUE
Ccdc12_38732	Ccdc12	117.35/70.841/73.178	7474.5/37341	73.178	22408	8.2389	978.24	1145.8	659.81	1	0	0	0	TRUE
Olfr64_12268	Olfr64	0/9.1082/0	197.63/1921.8	0.65558	1059.7	9.3235	41.479	2.5846	658.77	1	0	0	0	TRUE
Slc36a4_60328	Slc36a4	38.024/36.433/24.393	7368.1/20881	36.433	14124	8.5598	73.745	457.56	658.6	1	0	0	0	TRUE
Zfp597_36472	Zfp597	150.13/127.51/135.27	18866/48094	135.27	33480	7.9407	140.45	2579.5	656.54	1	0	0	0	TRUE
Lims2_56582	Lims2	180.28/54.649/95.354	15902/37197	95.354	26549	8.1062	4435	1624.9	656.26	1	0	0	0	TRUE
Smo_69640	Smo	258.95/106.26/159.66	24339/50237	159.66	37288	7.8586	6355.2	3212.2	655.09	1	0	0	0	TRUE
Hrh4_56542	Hrh4	182.25/172.04/245.04	13064/68321	182.25	40693	7.7948	2023.1	3827.3	654.82	1	0	0	0	TRUE
Dot1l_52444	Dot1l	22.29/18.216/12.196	6526.9/11291	18.216	8908.8	8.8569	26.416	184.51	654.52	1	0	0	0	TRUE
Bmpr1b_1665	Bmpr1b	253.05/91.082/98.68	10849/43299	98.68	27074	8.0855	11944	1700.2	654.22	1	0	0	0	TRUE
Usp26_45313	Usp26	43.268/56.673/74.287	9765/27607	56.673	18686	8.3399	244.97	818.14	651.31	1	0	0	0	TRUE
Rdh16_14575	Rdh16	3.2779/21.252/26.61	2771.9/16835	21.252	9803.6	8.7834	175.9	225.72	651.12	1	0	0	0	TRUE
Ucma_33014	Ucma	181.6/230.74/129.73	18157/62575	181.6	40366	7.7884	2552.9	3809.1	651.1	1	0	0	0	TRUE
Eif4g2_4830	Eif4g2	384.17/342.06/110.88	26954/96005	342.06	61480	7.4855	27610	8819.4	651.01	1	0	0	0	TRUE
Bag3_21447	Bag3	51.135/67.805/46.568	7753.2/27059	51.135	17406	8.3832	149.38	714.55	649.25	1	0	0	0	TRUE
Pnma2_61422	Pnma2	209.79/170.02/164.1	12968/63853	170.02	38410	7.8112	808.21	3490.9	647.22	1	0	0	0	TRUE
Dbp_4037	Dbp	52.446/18.216/18.849	5614.7/12367	18.849	8990.9	8.8234	564.59	192.93	645.94	1	0	0	0	TRUE
Skint2_70990	Skint2	7.2114/23.276/116.42	537.15/20102	23.276	10320	8.7318	4466.9	254.26	645.73	1	0	0	0	TRUE
Adam19_250	Adam19	44.579/50.601/47.677	6344.5/26656	47.677	16500	8.4051	9.0724	651.65	644.5	1	0	0	0	TRUE
Alkbh6_59601	Alkbh6	350.08/220.62/225.08	19231/72732	225.08	45981	7.6681	7822.5	5062.2	643.11	1	0	0	0	TRUE
Cyp4a32_77454	Cyp4a32	24.912/47.565/45.459	3182.4/28703	45.459	15942	8.4228	213.31	612.07	642.56	1	0	0	0	TRUE
Lhfpl4_68431	Lhfpl4	9.1781/17.204/32.154	3998.2/12838	17.204	8418	8.8532	143.96	171.23	642	1	0	0	0	TRUE
Map1b_11004	Map1b	36.057/8.0962/7.7613	4646.9/5631	8.0962	5138.9	9.1423	390.96	64.169	640.51	1	0	0	0	TRUE
Fam170b_48087	Fam170b	1.9667/6.0721/1.1088	15.202/4112.7	1.9667	2064	9.443	8.7951	10.379	640.03	1	0	0	0	TRUE
Setdb1_45517	Setdb1	47.202/80.962/35.48	25.337/32489	47.202	16257	8.3978	638.56	643.12	639.19	1	0	0	0	TRUE
Tmem19_30280	Tmem19	60.969/55.661/31.045	13490/22745	55.661	18117	8.3209	317.05	798.95	638.99	1	0	0	0	TRUE
Fam26d_68649	Fam26d	7.2114/5.0601/0	1180.7/6380.5	5.0601	3780.6	9.2854	15.116	34.922	638.9	1	0	0	0	TRUE
Rnf112_19116	Rnf112	28.19/85.01/44.351	2194.2/28972	44.351	15583	8.4247	957.16	592.51	638.35	1	0	0	0	TRUE
Olfr671_64029	Olfr671	41.301/31.373/26.61	4307.3/20496	31.373	12402	8.5817	60.631	376.01	637.95	1	0	0	0	TRUE
Gm11565_76998	Gm11565	0/6.0721/2.2175	136.82/4295.3	2.2175	2216.1	9.4285	9.8876	12.099	636.47	1	0	0	0	TRUE
Myl9_46566	Myl9	156.03/79.95/102.01	8173.8/45672	102.01	26923	8.03	1702.4	1776.3	636.39	1	0	0	0	TRUE
Insl3_8704	Insl3	117.35/190.26/195.14	20893/60422	190.26	40658	7.7319	2669.9	4051.6	635.76	1	0	0	0	TRUE
Tesk1_17433	Tesk1	118/344.09/274.97	18785/85022	274.97	51904	7.5552	14708	6601.3	635.44	1	0	0	0	TRUE
Trpa1_68910	Trpa1	20.979/187.22/18.849	1981.4/16979	20.979	9480.4	8.7529	13821	221.92	634.99	1	0	0	0	TRUE
Morc4_42127	Morc4	45.891/90.07/51.003	6582.6/27386	51.003	16984	8.3515	776.17	712.12	634.55	1	0	0	0	TRUE
Jup_8976	Jup	461.53/132.57/230.62	22125/70080	230.62	46102	7.6369	31465	5228.1	634.41	1	0	0	0	TRUE
2410131K14Rik_43110	2410131K14Rik	78.014/126.5/56.547	10844/34045	78.014	22445	8.1501	1406	1246.7	633.46	1	0	0	0	TRUE
Pemt_12817	Pemt	5.9002/31.373/5.5438	552.35/7725.8	5.9002	4139.1	9.2288	324.48	42.59	633.33	1	0	0	0	TRUE
Psg29_50427	Psg29	110.14/88.046/104.22	17533/36717	104.22	27125	8.0101	148.35	1827.5	632.08	1	0	0	0	TRUE
Drd3_4440	Drd3	47.857/71.853/115.31	6025.2/36380	71.853	21203	8.1851	1232.2	1118.6	631.82	1	0	0	0	TRUE
Abi1_34	Abi1	6.5558/3.0361/1.1088	790.52/4583.6	3.0361	2687	9.3794	8.0515	18.092	631.01	1	0	0	0	TRUE
control_78643	control	60.313/80.962/79.831	3542.2/41858	79.831	22700	8.1336	191.11	1285.2	630.97	1	0	0	0	TRUE
Gm8882_76823	Gm8882	13.112/0/0	1804/221.01	0.65558	1012.5	9.2578	85.957	2.5846	629.4	1	0	0	0	TRUE
Ccdc73_53344	Ccdc73	428.09/194.31/98.68	14914/66678	194.31	40796	7.7066	31900	4166.2	629.03	1	0	0	0	TRUE
Rprd2_41408	Rprd2	460.22/331.94/209.56	34773/81668	331.94	58221	7.4501	15716	8474.8	628.83	1	0	0	0	TRUE
Tyk2_23852	Tyk2	7.8669/7.0841/16.631	501.68/9397.8	7.8669	4949.7	9.125	38.715	61.822	628.52	1	0	0	0	TRUE
Cyp2r1_63040	Cyp2r1	18.356/43.517/66.526	5553.9/24734	43.517	15144	8.4103	581.23	577.91	628.14	1	0	0	0	TRUE
Ddx28_37753	Ddx28	0/0/0	0/2017.9	0.65558	1009	9.2528	0	2.5846	627.19	1	0	0	0	TRUE
0610040J01Rik_42551	0610040J01Rik	134.39/113.35/137.49	13307/50381	134.39	31844	7.8778	226.28	2557.4	627.03	1	0	0	0	TRUE
Cptp_44675	Cptp	15.078/5.0601/12.196	3015.1/10118	12.196	6566.8	8.9591	29.616	109.32	626.91	1	0	0	0	TRUE
Slc39a4_37848	Slc39a4	26.879/13.156/7.7613	4783.7/9013.4	13.156	6898.5	8.9289	108.71	120.66	626.83	1	0	0	0	TRUE
H3f3a_7318	H3f3a	49.824/92.094/73.178	5807.3/36640	73.178	21224	8.1605	451.61	1145.8	624.82	1	0	0	0	TRUE
Npl_40059	Npl	38.024/63.757/68.743	6233/32517	63.757	19375	8.225	343.54	955.46	624.75	1	0	0	0	TRUE
Ranbp1_14427	Ranbp1	215.03/352.18/245.04	24278/70195	245.04	47237	7.5849	6190.3	5665.6	624.3	1	0	0	0	TRUE
Asb18_52457	Asb18	9.8337/17.204/29.937	1140.2/15221	17.204	8180.6	8.8119	108.22	171.23	623.85	1	0	0	0	TRUE
Emp3_4896	Emp3	404.49/320.81/333.74	17614/97773	333.74	57694	7.4293	2586.7	8535.6	620.86	1	0	0	0	TRUE
Vmn2r19_59271	Vmn2r19	57.691/30.361/14.414	9004.9/14616	30.361	11810	8.557	500.62	360.18	620.7	1	0	0	0	TRUE
Specc1l_40688	Specc1l	13.112/29.349/12.196	3663.8/9945.5	13.112	6804.6	8.9137	132.24	120.12	619.66	1	0	0	0	TRUE
Cdh7_62066	Cdh7	58.347/22.264/80.94	14381/21861	58.347	18121	8.2544	906.18	850.1	619.51	1	0	0	0	TRUE
Tcte3_17325	Tcte3	27.534/4.0481/3.3263	2858/3488.1	4.0481	3173.1	9.2964	276.06	26.189	619.25	1	0	0	0	TRUE
Ube2u_72471	Ube2u	70.147/147.75/54.329	1880/38965	70.147	20423	8.1652	3136.6	1083.7	618.26	1	0	0	0	TRUE
Trim75_71488	Trim75	138.98/68.817/138.6	11919/52139	138.6	32029	7.842	2434.6	2663.7	617.9	1	0	0	0	TRUE
Unc13a_72739	Unc13a	24.256/38.457/9.9789	4393.5/15826	24.256	10110	8.645	202.75	268.37	615.66	1	0	0	0	TRUE
Gm3238_77511	Gm3238	0/2.024/1.1088	0/2757.8	1.1088	1378.9	9.354	1.0335	5.0105	615.53	1	0	0	0	TRUE
Stk32b_26910	Stk32b	14.423/70.841/4.4351	4332.7/10051	14.423	7191.9	8.8654	1641.4	136.02	615.42	1	0	0	0	TRUE
Eng_4935	Eng	0/0/1.1088	0/1979.5	0.65558	989.74	9.225	0.61468	2.5846	615.24	1	0	0	0	TRUE
Foxk2_33506	Foxk2	136.36/147.75/109.77	16454/46585	136.36	31520	7.8422	418.51	2607.1	614.64	1	0	0	0	TRUE
Als2_39953	Als2	1.9667/4.0481/14.414	663.84/5631	4.0481	3147.4	9.2847	55.891	26.189	614.23	1	0	0	0	TRUE
Ero1l_21893	Ero1l	34.09/19.228/31.045	6070.8/17633	31.045	11852	8.5309	74.456	370.87	613.81	1	0	0	0	TRUE
Adgre4_22620	Adgre4	192.08/2.024/2.2175	2255/2017.9	2.2175	2136.5	9.3757	18025	12.099	613.59	1	0	0	0	TRUE
Eif4b_42059	Eif4b	59.002/131.56/109.77	10115/44385	109.77	27250	7.9426	1526.1	1957	613.5	1	0	0	0	TRUE
Ackr2_26583	Ackr2	5.9002/153.83/24.393	3714.4/16509	24.393	10112	8.6375	8547.6	270.35	613.49	1	0	0	0	TRUE
Spata45_41830	Spata45	1.9667/13.156/5.5438	1778.7/5919.2	5.5438	3849	9.2005	35.372	39.293	613.14	1	0	0	0	TRUE
Tubgcp4_22328	Tubgcp4	51.791/46.553/47.677	5923.9/25397	47.677	15660	8.3298	9.0938	651.65	611.61	1	0	0	0	TRUE
Myl4_11224	Myl4	456.28/439.22/385.85	27329/1.0891e+05	439.22	68120	7.2737	1569.6	12292	610.46	1	0	0	0	TRUE
Mmp19_26135	Mmp19	10.489/17.204/52.112	258.44/15749	17.204	8003.9	8.7805	631.81	171.23	610.35	1	0	0	0	TRUE
Zranb1_71836	Zranb1	57.035/51.613/43.242	14609/18325	51.613	16467	8.29	49.74	723.35	610.35	1	0	0	0	TRUE
Ralgps2_44055	Ralgps2	7.8669/11.132/5.5438	587.83/9003.8	7.8669	4795.8	9.0794	8.0294	61.822	608.95	1	0	0	0	TRUE
Synb_61426	Synb	20.979/7.0841/5.5438	3197.6/5755.9	7.0841	4476.7	9.1135	97.713	53.966	608.43	1	0	0	0	TRUE
Xk_18952	Xk	0.65558/29.349/14.414	1793.9/12405	14.414	7099.7	8.8476	206.17	135.91	607.76	1	0	0	0	TRUE
Myl3_11230	Myl3	3.2779/3.0361/3.3263	2640.1/2796.3	3.2779	2718.2	9.3121	0.030414	19.963	607.64	1	0	0	0	TRUE
Tdpoz1_52167	Tdpoz1	1.3112/60.721/11.088	390.19/11569	11.088	5979.8	8.9507	1279.5	96.558	607.42	1	0	0	0	TRUE
A630076J17Rik_69743	A630076J17Rik	36.057/78.937/31.045	7408.6/18450	36.057	12929	8.4468	931.93	451.37	606.86	1	0	0	0	TRUE
Olfr487_64227	Olfr487	5.2446/14.168/18.849	481.41/13530	14.168	7005.6	8.8515	50.77	132.9	606.47	1	0	0	0	TRUE
Defa25_4159	Defa25	0/9.1082/127.51	826/9676.4	9.1082	5251.2	9.0213	7050.7	74.771	606.23	1	0	0	0	TRUE
control_79566	control	28.19/18.216/16.631	9202.5/7226.1	18.216	8214.3	8.7398	50.992	184.51	603.39	1	0	0	0	TRUE
Olfr1413_67349	Olfr1413	103.58/161.92/73.178	15897/35487	103.58	25692	7.9406	2164	1812.6	601.02	1	0	0	0	TRUE
Hist1h4c_69197	Hist1h4c	81.292/20.24/15.523	3400.3/14116	20.24	8758.1	8.6878	1874.8	211.76	600.46	1	0	0	0	TRUE
Nthl1_11975	Nthl1	6.5558/42.505/25.502	126.69/20218	25.502	10172	8.5845	324.03	286.56	599.4	1	0	0	0	TRUE
Chrna2_50051	Chrna2	70.147/79.95/85.375	7783.6/35362	79.95	21573	8.058	62.762	1287.7	598.94	1	0	0	0	TRUE
Angpt1_464	Angpt1	24.256/14.168/26.61	1464.5/18161	24.256	9812.9	8.602	53.656	268.37	597.53	1	0	0	0	TRUE
Rnf150_71268	Rnf150	1.9667/11.132/14.414	1150.3/10609	11.132	5879.4	8.9209	47.388	97.064	595.64	1	0	0	0	TRUE
Olfr293_64020	Olfr293	77.358/83.998/80.94	8037/35208	80.94	21622	8.0438	11.089	1308.8	595.44	1	0	0	0	TRUE
Cyb561d1_37842	Cyb561d1	14.423/28.337/34.372	2021.9/19622	28.337	10822	8.5272	115.01	329.02	595.06	1	0	0	0	TRUE
Ugt3a2_55873	Ugt3a2	24.912/37.445/37.698	4206/21784	37.445	12995	8.4011	78.566	474.33	594.95	1	0	0	0	TRUE
Psmd12_29689	Psmd12	3.9335/52.625/31.045	1003.4/21938	31.045	11471	8.4837	600.37	370.87	594.01	1	0	0	0	TRUE
Oas1h_63764	Oas1h	14.423/14.168/19.958	1378.3/12492	14.423	6935.1	8.8129	15.35	136.02	593.41	1	0	0	0	TRUE
Cadps2_70050	Cadps2	75.392/15.18/16.631	9486.3/5736.7	16.631	7611.5	8.7541	1727.4	163.82	593.38	1	0	0	0	TRUE
Atxn1l_22483	Atxn1l	8.5225/11.132/26.61	2320.9/9378.5	11.132	5849.7	8.9136	123.19	97.064	592.62	1	0	0	0	TRUE
Cst3_3667	Cst3	29.501/14.168/17.74	3319.2/12502	17.74	7910.4	8.7216	75.538	178.23	591.19	1	0	0	0	TRUE
Triml1_63114	Triml1	0.65558/1.012/3.3263	86.147/2411.9	1.012	1249	9.2791	2.7414	4.4643	590.67	1	0	0	0	TRUE
Fbxl6_21669	Fbxl6	153.41/39.469/34.372	9293.7/17364	39.469	13329	8.3636	6503.8	508.3	589.44	1	0	0	0	TRUE
Lrrn1_9998	Lrrn1	30.812/5.0601/11.088	3597.9/7994.8	11.088	5796.4	8.9057	212.7	96.558	588.75	1	0	0	0	TRUE
Nrxn1_11928	Nrxn1	67.525/42.505/36.589	8645.1/19238	42.505	13941	8.3241	330.49	560.31	587.17	1	0	0	0	TRUE
Krba1_43852	Krba1	51.791/29.349/36.589	2503.3/22687	36.589	12595	8.3885	141.76	460.15	585.46	1	0	0	0	TRUE
Ncs1_5844	Ncs1	51.135/21.252/13.305	2584.4/15019	21.252	8801.8	8.6279	478.07	225.72	584.44	1	0	0	0	TRUE
Resp18_14648	Resp18	83.259/40.481/56.547	7038.7/26406	56.547	16722	8.1829	485.82	815.74	583.51	1	0	0	0	TRUE
Fam171a2_55125	Fam171a2	5.9002/22.264/8.8701	618.23/9311.3	8.8701	4964.8	8.9747	94.114	72.243	583.07	1	0	0	0	TRUE
Krt27_9521	Krt27	38.024/31.373/177.4	2999.9/22726	38.024	12863	8.3648	9735.3	483.99	582.95	1	0	0	0	TRUE
Sugp2_60084	Sugp2	69.491/166.98/33.263	8214.4/30038	69.491	19126	8.084	5408.6	1070.3	582.5	1	0	0	0	TRUE
Aph1b_52367	Aph1b	5.2446/10.12/13.305	1195.9/9599.6	10.12	5397.7	8.9233	16.958	85.745	581.83	1	0	0	0	TRUE
Vasp_18660	Vasp	0.65558/0/0	1064.2/807.17	0.65558	935.67	9.1441	0.21489	2.5846	581.6	1	0	0	0	TRUE
Olfr177_67198	Olfr177	3.9335/7.0841/2.2175	658.77/5189	3.9335	2923.9	9.2115	6.4356	25.238	581.22	1	0	0	0	TRUE
Tmem209_38725	Tmem209	104.89/71.853/53.221	5543.8/33469	71.853	19506	8.0648	719.39	1118.6	581.09	1	0	0	0	TRUE
Mtch1_24878	Mtch1	102.27/39.469/77.613	11331/29664	77.613	20497	8.0265	1031.5	1238.3	580.27	1	0	0	0	TRUE
Nupr1l_33806	Nupr1l	15.078/1.012/1.1088	5.0675/2594.5	1.1088	1299.8	9.2688	97.579	5.0105	580.17	1	0	0	0	TRUE
Klf8_63520	Klf8	150.13/59.709/110.88	19348/32537	110.88	25942	7.8573	2079.4	1983.2	580.05	1	0	0	0	TRUE
Gm3336_78350	Gm3336	142.92/1.012/4.4351	653.7/5650.2	4.4351	3151.9	9.1802	9594.4	29.459	579.91	1	0	0	0	TRUE
Scly_22139	Scly	24.912/36.433/43.242	2690.8/22188	36.433	12439	8.3765	89.545	457.56	579.82	1	0	0	0	TRUE
Esp8_78134	Esp8	27.534/42.505/27.719	1854.7/18901	27.719	10378	8.4974	109.33	319.65	578.92	1	0	0	0	TRUE
Smurf1_42211	Smurf1	4.5891/7.0841/12.196	4094.5/4391.4	7.0841	4242.9	9.0361	16.18	53.966	576.61	1	0	0	0	TRUE
Vcam1_18677	Vcam1	0/0/2.2175	10.135/1845	0.65558	927.55	9.1315	2.4587	2.5846	576.55	1	0	0	0	TRUE
Scnn1b_15339	Scnn1b	69.491/62.745/58.764	7834.3/27559	62.745	17697	8.117	30.679	935.53	576.53	1	0	0	0	TRUE
Apbb3_56601	Apbb3	73.425/88.046/39.915	5969.5/33277	73.425	19623	8.0426	668.32	1150.9	576.25	1	0	0	0	TRUE
Cnrip1_71931	Cnrip1	42.613/57.685/47.677	2250/27252	47.677	14751	8.2434	62.906	651.65	575.97	1	0	0	0	TRUE
BC048502_56096	BC048502	27.534/23.276/32.154	3040.5/17518	27.534	10279	8.4929	19.736	316.86	575.91	1	0	0	0	TRUE
Smad3_10209	Smad3	11.145/83.998/31.045	5883.3/16355	31.045	11119	8.4388	1600	370.87	575.76	1	0	0	0	TRUE
Olfr1535_73646	Olfr1535	34.09/30.361/19.958	6592.8/15317	30.361	10955	8.4485	61.064	360.18	575.63	1	0	0	0	TRUE
Ada_228	Ada	11.8/126.5/7.7613	2082.7/9714.9	11.8	5898.8	8.8483	6586.4	104.72	575.29	1	0	0	0	TRUE
Map1lc3b_30755	Map1lc3b	53.757/9.1082/7.7613	6359.7/3593.8	9.1082	4976.7	8.9438	997.69	74.771	574.49	1	0	0	0	TRUE
Pcid2_59986	Pcid2	4.5891/11.132/8.8701	856.4/8926.9	8.8701	4891.7	8.9533	11.722	72.243	574.47	1	0	0	0	TRUE
Sfi1_44494	Sfi1	5.2446/6.0721/17.74	0/7639.3	6.0721	3819.6	9.0775	68.415	44.202	573.6	1	0	0	0	TRUE
Pithd1_27711	Pithd1	23.601/30.361/42.133	5619.8/16211	30.361	10915	8.4433	92.142	360.18	573.54	1	0	0	0	TRUE
Dnaaf3_74577	Dnaaf3	43.268/20.24/9.9789	5057.3/11675	20.24	8366.2	8.6218	317.79	211.76	573.53	1	0	0	0	TRUE
Skiv2l_48918	Skiv2l	0/0/0	0/1845	0.65558	922.48	9.1236	0	2.5846	573.4	1	0	0	0	TRUE
Pofut1_50706	Pofut1	0/0/99.789	618.23/1220.4	0.65558	919.3	9.1186	4978.9	2.5846	571.42	1	0	0	0	TRUE
Arhgef9_60806	Arhgef9	7.2114/2.024/8.8701	2726.3/5765.5	7.2114	4245.9	9.0146	14.83	55.226	570.37	1	0	0	0	TRUE
Vmn1r172_45042	Vmn1r172	390.07/478.69/369.22	22809/94823	390.07	58816	7.2327	4143.8	10499	570.2	1	0	0	0	TRUE
Myo1b_11259	Myo1b	23.601/40.481/38.807	2067.5/23379	38.807	12723	8.3204	117.01	497.13	568.91	1	0	0	0	TRUE
Olfr765_74772	Olfr765	12.456/7.0841/24.393	2589.5/9493.9	12.456	6041.7	8.8108	85.672	112.36	568.8	1	0	0	0	TRUE
Stra8_16861	Stra8	9633.1/4047.1/3948.3	2.1534e+05/3.4589e+05	4047.1	280620	6.1152	15607000	236710	568.46	1	0	0	0	TRUE
Sh3glb1_23818	Sh3glb1	0/3.0361/4.4351	152.02/4689.3	3.0361	2420.6	9.2288	5.5874	18.092	568.38	1	0	0	0	TRUE
Fam117b_38848	Fam117b	17.701/42.505/77.613	359.79/26569	42.505	13465	8.2739	923.93	560.31	567.03	1	0	0	0	TRUE
Flnb_69128	Flnb	392.04/229.73/363.67	34895/76451	363.67	55673	7.2542	9373	9566.6	565.48	1	0	0	0	TRUE
Ccnyl1_57242	Ccnyl1	21.634/29.349/99.789	3319.2/17729	29.349	10524	8.438	2510.7	344.51	565.42	1	0	0	0	TRUE
Ace2_35267	Ace2	53.102/28.337/52.112	3983/26723	52.112	15353	8.1754	283.12	732.57	565.32	1	0	0	0	TRUE
Gabrq_25530	Gabrq	153.41/74.889/89.81	21273/22697	89.81	21985	7.9195	2133.5	1501.3	565.08	1	0	0	0	TRUE
Cd5l_905	Cd5l	0/14.168/2.2175	0/3930.1	2.2175	1965.1	9.2552	73.869	12.099	564.31	1	0	0	0	TRUE
Sh3tc1_58762	Sh3tc1	93.092/112.33/197.36	21466/29452	112.33	25459	7.8115	3799.8	2017.7	564.28	1	0	0	0	TRUE
Akap8l_23357	Akap8l	0.65558/2.024/1.1088	182.43/2344.6	1.1088	1263.5	9.228	0.52155	5.0105	563.98	1	0	0	0	TRUE
Actrt1_39381	Actrt1	14.423/11.132/4.4351	1256.7/9878.2	11.132	5567.5	8.8423	27.84	97.064	563.98	1	0	0	0	TRUE
Vwa8_55835	Vwa8	132.43/135.61/66.526	7869.8/48882	132.43	28376	7.7325	2176.5	2508.1	563.96	1	0	0	0	TRUE
Ikzf2_19329	Ikzf2	36.057/10.12/2.2175	4089.4/6361.3	10.12	5225.4	8.8765	367.58	85.745	563.21	1	0	0	0	TRUE
Tsnax_22982	Tsnax	37.368/37.445/14.414	5016.8/19526	37.368	12271	8.3213	263.45	473.05	562.48	1	0	0	0	TRUE
Hsf5_70573	Hsf5	4.5891/4.0481/1.1088	1003.4/4756.5	4.0481	2879.9	9.1566	4.4661	26.189	561.97	1	0	0	0	TRUE
Dgkz_47825	Dgkz	31.468/3.0361/6.6526	3364.8/4554.7	6.6526	3959.8	9.0156	314.44	49.746	560.48	1	0	0	0	TRUE
Gpd1l_71502	Gpd1l	13.112/16.192/6.6526	3689.1/8619.4	13.112	6154.3	8.7688	25.605	120.12	560.32	1	0	0	0	TRUE
Fcgr4_63696	Fcgr4	5.2446/6.0721/5.5438	709.44/6322.8	5.5438	3516.1	9.0701	0.18431	39.293	560.04	1	0	0	0	TRUE
2010107G12Rik_62826	2010107G12Rik	17.701/0/3.3263	1925.6/3123	3.3263	2524.3	9.1891	108.84	20.343	558.94	1	0	0	0	TRUE
Tdpoz5_73466	Tdpoz5	0/0/6.6526	10.135/1787.3	0.65558	898.72	9.086	22.128	2.5846	558.62	1	0	0	0	TRUE
Ankrd27_63587	Ankrd27	0.65558/5.0601/0	932.41/864.83	0.65558	898.62	9.0858	9.9148	2.5846	558.55	1	0	0	0	TRUE
Cox5b_3291	Cox5b	182.25/24.288/27.719	5011.7/15010	27.719	10011	8.4455	11946	319.65	558.37	1	0	0	0	TRUE
Olfr693_65271	Olfr693	0/3.0361/3.3263	222.97/4525.9	3.0361	2374.4	9.201	4.6509	18.092	557.52	1	0	0	0	TRUE
Tradd_36963	Tradd	139.64/43.517/167.42	9537/48507	139.64	29022	7.6891	5005.7	2690.3	556.85	1	0	0	0	TRUE
Ankrd37_76431	Ankrd37	85.225/7.0841/2.2175	5548.9/2642.5	7.0841	4095.7	8.9852	3064.9	53.966	556.56	1	0	0	0	TRUE
Nov_11805	Nov	25.568/24.288/21.066	3927.3/14356	24.288	9141.7	8.498	6.0086	268.83	556.07	1	0	0	0	TRUE
Ppbp_25705	Ppbp	66.213/114.36/36.589	6410.3/28962	66.213	17686	8.0397	1597.8	1004.3	556.01	1	0	0	0	TRUE
Prr13_27588	Prr13	132.43/208.48/172.97	14979/51659	172.97	33319	7.5814	1452.2	3571.3	554.65	1	0	0	0	TRUE
Rhd_14744	Rhd	1.9667/0/9.9789	0/3574.6	1.9667	1787.3	9.2355	34.031	10.379	554.16	1	0	0	0	TRUE
Foxj3_58460	Foxj3	0/4.0481/0	937.48/845.61	0.65558	891.54	9.0744	8.1935	2.5846	554.15	1	0	0	0	TRUE
Sv2c_41452	Sv2c	90.47/37.445/31.045	5493.1/18719	37.445	12106	8.2988	1426.3	474.33	554.13	1	0	0	0	TRUE
Olfr1099_66401	Olfr1099	15.734/15.18/12.196	1347.9/12040	15.18	6694.1	8.6927	4.6051	145.41	553.87	1	0	0	0	TRUE
Atp6v0a4_50736	Atp6v0a4	0/0/0	0/1777.7	0.65558	888.85	9.0701	0	2.5846	552.48	1	0	0	0	TRUE
Zc3h13_30459	Zc3h13	37.368/3.0361/4.4351	0/6005.7	4.4351	3002.9	9.1103	543.27	29.459	552.44	1	0	0	0	TRUE
Six3_15864	Six3	43.924/96.142/174.08	8640/36303	96.142	22472	7.8539	4400.2	1642.7	552.08	1	0	0	0	TRUE
H2-Q10_7279	H2-Q10	11.8/28.337/14.414	3841.1/9051.8	14.414	6446.5	8.7084	100.33	135.91	551.73	1	0	0	0	TRUE
Ntan1_11968	Ntan1	47.202/22.264/11.088	6516.8/10609	22.264	8562.6	8.524	373.39	239.88	551.41	1	0	0	0	TRUE
Gria2_6919	Gria2	126.53/135.61/166.31	7292.1/48949	135.61	28121	7.6855	512.62	2588.1	550.09	1	0	0	0	TRUE
Bbs1_22383	Bbs1	129.15/102.21/105.33	15988/31557	105.33	23772	7.8046	288.48	1853.2	549.77	1	0	0	0	TRUE
Hhipl2_44381	Hhipl2	58.347/51.613/70.961	5837.7/26233	58.347	16035	8.078	102.23	850.1	547.97	1	0	0	0	TRUE
Eml5_69598	Eml5	4.5891/4.0481/6.6526	1444.2/4641.2	4.5891	3042.7	9.089	2.2754	30.785	547.57	1	0	0	0	TRUE
Akap17b_71576	Akap17b	0/101.2/1.1088	684.11/1768.1	1.1088	1226.1	9.1846	5009.9	5.0105	547.26	1	0	0	0	TRUE
Fam227b_42242	Fam227b	121.94/35.421/42.133	7018.4/18796	42.133	12907	8.2253	3206.9	553.87	546.64	1	0	0	0	TRUE
Rrp1_11748	Rrp1	1.3112/1.012/6.6526	597.96/2123.6	1.3112	1360.8	9.2027	14.31	6.1963	546.15	1	0	0	0	TRUE
3110002H16Rik_42784	3110002H16Rik	1262/563.69/503.38	66602/77421	563.69	72011	6.9946	245630	17124	545.99	1	0	0	0	TRUE
Smim1_33533	Smim1	3.2779/3.0361/1.1088	891.87/3757.2	3.0361	2324.5	9.1704	1.8865	18.092	545.78	1	0	0	0	TRUE
Lbx2_9704	Lbx2	0/8.0962/3.3263	0/4929.5	3.3263	2464.8	9.1547	16.908	20.343	545.74	1	0	0	0	TRUE
Cdhr1_50990	Cdhr1	0/2.024/4.4351	20.27/3565	2.024	1792.6	9.2122	4.9549	10.767	545.7	1	0	0	0	TRUE
Efemp2_26278	Efemp2	252.4/118.41/134.16	10758/44596	134.16	27677	7.6779	7114.2	2551.6	545.27	1	0	0	0	TRUE
Lacc1_53089	Lacc1	239.94/150.79/151.9	16206/43885	151.9	30045	7.6185	3876.3	3007.2	545.12	1	0	0	0	TRUE
Cog7_59871	Cog7	17.701/22.264/8.8701	10.135/14558	17.701	7284	8.6057	49.403	177.71	545.08	1	0	0	0	TRUE
Thoc5_48760	Thoc5	0/3.0361/1.1088	0/2440.7	1.1088	1220.4	9.1779	2.4719	5.0105	544.69	1	0	0	0	TRUE
Olfr154_20846	Olfr154	11.8/0/1.1088	162.16/2277.4	1.1088	1219.8	9.1772	57.77	5.0105	544.43	1	0	0	0	TRUE
Nsg1_11953	Nsg1	33.435/44.529/54.329	9268.4/17373	44.529	13321	8.1928	109.57	595.65	543.98	1	0	0	0	TRUE
B4galt4_24626	B4galt4	10.489/13.156/70.961	3542.2/8417.6	13.156	5979.9	8.7228	1674.2	120.66	543.2	1	0	0	0	TRUE
Olfr1408_66390	Olfr1408	53.757/221.63/57.656	2326/29135	57.656	15730	8.0672	13452	836.87	541.77	1	0	0	0	TRUE
Mesp2_10610	Mesp2	4.5891/9.1082/25.502	2817.5/6563.1	9.1082	4690.3	8.8583	144.58	74.771	541.36	1	0	0	0	TRUE
Smoc2_26830	Smoc2	33.435/17.204/13.305	3516.8/10676	17.204	7096.3	8.6068	139.31	171.23	540.99	1	0	0	0	TRUE
Serpinh1_2205	Serpinh1	63.591/47.565/23.284	8933.9/18728	47.565	13831	8.1539	423.2	649.63	540.79	1	0	0	0	TRUE
Gabrr3_70714	Gabrr3	0.65558/0/8.8701	182.43/1556.7	0.65558	869.56	9.0385	33.954	2.5846	540.48	1	0	0	0	TRUE
Smim11_33650	Smim11	243.22/243.9/165.21	43631/37668	243.22	40649	7.3789	3043.3	5610	539.47	1	0	0	0	TRUE
Lrrc30_61753	Lrrc30	15.734/26.312/22.175	729.71/15970	22.175	8350.1	8.4932	29.304	238.63	539.11	1	0	0	0	TRUE
Ttc5_55741	Ttc5	5.2446/0/1.1088	91.214/2315.8	1.1088	1203.5	9.1578	9.1674	5.0105	537.17	1	0	0	0	TRUE
Clrn1_57952	Clrn1	39.99/2.024/5.5438	4545.5/2190.9	5.5438	3368.2	9.0081	599.47	39.293	536.44	1	0	0	0	TRUE
Tmem173_38571	Tmem173	0/13.156/3.3263	106.42/4737.3	3.3263	2421.9	9.1294	53.846	20.343	536.23	1	0	0	0	TRUE
Scrg1_15351	Scrg1	5.2446/5.0601/8.8701	96.282/6390.1	5.2446	3243.2	9.021	6.5891	36.575	535.4	1	0	0	0	TRUE
Ar_1003	Ar	126.53/158.89/263.89	10662/50102	158.89	30382	7.5701	6035.9	3191.6	534.98	1	0	0	0	TRUE
Spinkl_43593	Spinkl	142.92/89.058/88.701	7525.2/33843	89.058	20684	7.8435	1450.4	1484.8	534.49	1	0	0	0	TRUE
Tbr1_17133	Tbr1	53.102/139.66/32.154	3957.7/25435	53.102	14697	8.0857	3965.4	750.94	534.37	1	0	0	0	TRUE
Tyw3_52827	Tyw3	16.389/10.12/0	5949.2/3959	10.12	4954.1	8.7996	70.861	85.745	533.91	1	0	0	0	TRUE
Gm9573_77039	Gm9573	49.168/23.276/38.807	6151.9/17710	38.807	11931	8.2276	174.28	497.13	533.36	1	0	0	0	TRUE
4930578I06Rik_31457	4930578I06Rik	2.6223/5.0601/3.3263	1307.4/3507.3	3.3263	2407.4	9.1207	1.7508	20.343	533.01	1	0	0	0	TRUE
Ins2_8698	Ins2	3.2779/27.325/28.828	2032.1/16903	27.325	9467.3	8.3849	290.25	313.7	532.99	1	0	0	0	TRUE
Fam71a_75360	Fam71a	65.558/40.481/43.242	9942.4/15663	43.242	12803	8.1769	252.82	573.11	532.98	1	0	0	0	TRUE
Nasp_22210	Nasp	20.979/7.0841/12.196	1358.1/9811	12.196	5584.5	8.7254	51.631	109.32	532.96	1	0	0	0	TRUE
Irf1_8722	Irf1	47.857/31.373/15.523	7525.2/13174	31.373	10350	8.3207	261.48	376.01	532.12	1	0	0	0	TRUE
Raly_14422	Raly	3.2779/12.144/13.305	116.55/10993	12.144	5554.7	8.7234	39.98	108.71	531.6	1	0	0	0	TRUE
Pof1b_34833	Pof1b	120.63/123.47/145.25	12694/38244	123.47	25469	7.6769	241.25	2286.1	530.1	1	0	0	0	TRUE
control_79128	control	7.8669/4.0481/12.196	653.7/7696.9	7.8669	4175.3	8.8796	16.664	61.822	530.03	1	0	0	0	TRUE
Parp2_378	Parp2	0.65558/97.154/3.3263	1297.3/3488.1	3.3263	2392.7	9.1119	4405.4	20.343	529.76	1	0	0	0	TRUE
Fcgr3_5456	Fcgr3	40.646/24.288/18.849	2685.8/14731	24.288	8708.3	8.4279	148.58	268.83	529.64	1	0	0	0	TRUE
Mapre3_46973	Mapre3	3.9335/6.0721/5.5438	91.214/6553.5	5.5438	3322.3	8.9883	1.4362	39.293	529.12	1	0	0	0	TRUE
Fam114a2_31397	Fam114a2	62.28/63.757/47.677	12213/20112	62.28	16162	7.9968	107.72	926.4	528.96	1	0	0	0	TRUE
Alpi_43076	Alpi	106.86/266.16/136.38	10799/43462	136.38	27131	7.6257	8857.5	2607.5	528.64	1	0	0	0	TRUE
Lipg_9876	Lipg	32.779/7.0841/7.7613	3055.7/5198.6	7.7613	4127.1	8.8801	313.17	60.747	528.53	1	0	0	0	TRUE
Cmklr1_6778	Cmklr1	1.9667/3.0361/1.1088	1631.7/1777.7	1.9667	1704.7	9.1673	0.93978	10.379	528.52	1	0	0	0	TRUE
Pcdh15_1354	Pcdh15	42.613/18.216/13.305	7165.4/7226.1	18.216	7195.7	8.5489	309.65	184.51	528.41	1	0	0	0	TRUE
Xpnpep1_51101	Xpnpep1	69.491/75.901/62.091	9709.3/24984	69.491	17347	7.9431	47.929	1070.3	528.1	1	0	0	0	TRUE
Sephs1_49321	Sephs1	1.9667/16.192/15.523	3278.6/9666.8	15.523	6472.7	8.614	92.106	149.71	527.74	1	0	0	0	TRUE
Ehd4_46558	Ehd4	12.456/13.156/6.6526	3319.2/7889.1	12.456	5604.2	8.7024	17.085	112.36	527.53	1	0	0	0	TRUE
Apoc2_941	Apoc2	81.292/72.865/128.62	7023.5/31374	81.292	19199	7.8661	1155.3	1316.3	526.93	1	0	0	0	TRUE
Zfp91_49649	Zfp91	24.912/39.469/144.14	5356.3/18440	39.469	11898	8.1998	5583.9	508.3	525.99	1	0	0	0	TRUE
Cd209g_35460	Cd209g	7.2114/22.264/6.6526	1915.5/5909.6	7.2114	3912.6	8.8966	113.45	55.226	525.52	1	0	0	0	TRUE
Slx1b_42161	Slx1b	0/15.18/1.1088	0/2354.2	1.1088	1177.1	9.1259	99.619	5.0105	525.38	1	0	0	0	TRUE
control_78973	control	194.71/128.53/74.287	14037/37774	128.53	25905	7.6439	3660.9	2410.8	524.98	1	0	0	0	TRUE
Theg_17604	Theg	28.845/95.13/119.75	10236/32200	95.13	21218	7.7862	2499.8	1619.9	524.83	1	0	0	0	TRUE
Abhd2_23705	Abhd2	0.65558/1.012/2.2175	0/2219.7	1.012	1109.9	9.1088	0.79015	4.4643	524.8	1	0	0	0	TRUE
Olfr889_65375	Olfr889	19.012/54.649/46.568	2265.2/24205	46.568	13235	8.1203	412.32	631.78	524.71	1	0	0	0	TRUE
Prrx2_15189	Prrx2	3.9335/4.0481/14.414	3440.8/1931.4	4.0481	2686.1	9.0561	53.732	26.189	524.09	1	0	0	0	TRUE
Fbln5_19538	Fbln5	43.268/32.385/99.789	5310.7/19718	43.268	12514	8.1432	1656.5	573.57	520.73	1	0	0	0	TRUE
Hsfy2_36478	Hsfy2	15.734/31.373/16.631	1464.5/11896	16.631	6680.3	8.5658	109.05	163.82	520.63	1	0	0	0	TRUE
Gpr179_55065	Gpr179	9.8337/5.0601/3.3263	3309.1/2853.9	5.0601	3081.5	8.9905	12.897	34.922	520.59	1	0	0	0	TRUE
Kptn_35718	Kptn	0/3.0361/0	40.54/1633.6	0.65558	837.05	8.9836	4.6088	2.5846	520.26	1	0	0	0	TRUE
Myo1b_11260	Myo1b	0/10.12/2.2175	0/3622.7	2.2175	1811.3	9.1377	33.685	12.099	520.11	1	0	0	0	TRUE
Hoxd13_7883	Hoxd13	0/13.156/5.5438	775.32/5755.9	5.5438	3265.6	8.9634	44.342	39.293	520.08	1	0	0	0	TRUE
Arid5b_36759	Arid5b	0/0/2.2175	481.41/1191.5	0.65558	836.47	8.9826	2.4587	2.5846	519.9	1	0	0	0	TRUE
Sema6c_15583	Sema6c	0.65558/2.024/57.656	60.81/3353.6	2.024	1707.2	9.1418	1548.4	10.767	519.67	1	0	0	0	TRUE
Sesn1_50820	Sesn1	91.125/35.421/66.526	19332/13760	66.526	16546	7.9369	786.34	1010.5	518.42	1	0	0	0	TRUE
Ccdc152_77237	Ccdc152	112.76/160.91/127.51	15927/34929	127.51	25428	7.6285	666.64	2385.6	518.01	1	0	0	0	TRUE
Actl7b_189	Actl7b	1.9667/17.204/29.937	1008.4/12578	17.204	6793.4	8.5439	197.15	171.23	517.84	1	0	0	0	TRUE
2200002J24Rik_33992	2200002J24Rik	89.814/72.865/70.961	6126.6/28972	72.865	17549	7.8924	145.45	1139.4	517.74	1	0	0	0	TRUE
Ptpn2_14088	Ptpn2	19974/14818/14689	2.5556e+05/9.7178e+05	14818	613670	5.372	13298000	1340100	517.3	1	0	0	0	TRUE
Cacna1d_1864	Cacna1d	83.914/41.493/16.631	6329.3/17854	41.493	12092	8.1527	1208.8	542.83	517.2	1	0	0	0	TRUE
Ntf5_44172	Ntf5	105.55/61.733/59.873	6724.5/24696	61.733	15710	7.9683	961.61	915.7	517.12	1	0	0	0	TRUE
Gbp7_58186	Gbp7	0/72.865/0	0/1662.4	0.65558	831.19	8.9734	2654.7	2.5846	516.61	1	0	0	0	TRUE
Olfr43_66194	Olfr43	112.76/43.517/48.786	8006.6/18853	48.786	13430	8.0756	2060.2	671.66	516.32	1	0	0	0	TRUE
Rgs22_75843	Rgs22	1.3112/0/5.5438	486.48/2085.2	1.3112	1285.8	9.121	9.8173	6.1963	516.03	1	0	0	0	TRUE
Lrrc59_46411	Lrrc59	50.48/64.769/43.242	4651.9/22783	50.48	13718	8.0579	128.29	702.52	515.64	1	0	0	0	TRUE
Gm14744_76062	Gm14744	123.25/25.3/70.961	9182.2/25138	70.961	17160	7.8977	2409.5	1100.3	515.19	1	0	0	0	TRUE
Slc4a7_55675	Slc4a7	0.65558/9.1082/16.631	248.31/8677.1	9.1082	4462.7	8.7866	64.023	74.771	515.04	1	0	0	0	TRUE
Pamr1_53049	Pamr1	10.489/4.0481/3.3263	0/5275.4	4.0481	2637.7	9.0299	21.005	26.189	514.63	1	0	0	0	TRUE
Cmtr2_60228	Cmtr2	71.458/41.493/27.719	15152/8907.7	41.493	12030	8.1453	543.82	542.83	514.54	1	0	0	0	TRUE
Cutal_43936	Cutal	37.368/9.1082/31.045	2042.2/17825	31.045	9933.6	8.2762	260.61	370.87	514.2	1	0	0	0	TRUE
Nav2_44084	Nav2	110.14/152.81/66.526	4677.3/41118	110.14	22897	7.6868	1861.7	1965.7	513.97	1	0	0	0	TRUE
Olfr418_65963	Olfr418	43.924/6.0721/7.7613	2761.8/5256.2	7.7613	4009	8.8382	655.29	60.747	513.37	1	0	0	0	TRUE
Rad21l_76953	Rad21l	46.546/37.445/63.199	3430.7/22418	46.546	12924	8.0867	180.09	631.39	512.5	1	0	0	0	TRUE
Hspb6_62923	Hspb6	3.2779/26.312/1.1088	0/4583.6	3.2779	2291.8	9.066	267.65	19.963	512.2	1	0	0	0	TRUE
Unc80_70814	Unc80	100.3/99.178/131.94	3440.8/39407	100.3	21424	7.7245	501.15	1737.2	511.61	1	0	0	0	TRUE
Gm6890_76023	Gm6890	51.791/152.81/84.266	6719.5/31460	84.266	19090	7.8067	2876.8	1380.2	511.57	1	0	0	0	TRUE
Slc35e4_47573	Slc35e4	87.848/58.697/52.112	8275.2/21784	58.697	15030	7.976	446.56	856.84	511.44	1	0	0	0	TRUE
Ces1c_5137	Ces1c	116.04/55.661/59.873	7231.3/23206	59.873	15219	7.9659	1586.1	879.53	511.14	1	0	0	0	TRUE
Ldhal6b_48319	Ldhal6b	0.65558/4.0481/0	0/1643.2	0.65558	821.58	8.9567	5.9694	2.5846	510.64	1	0	0	0	TRUE
Ggct_49760	Ggct	26.223/4.0481/19.958	3896.9/10849	19.958	7372.8	8.4588	146.19	207.9	509.95	1	0	0	0	TRUE
Acaa2_22582	Acaa2	178.32/91.082/262.78	16839/45663	178.32	31251	7.4453	7371.7	3718.3	509.57	1	0	0	0	TRUE
Olfr883_65152	Olfr883	302.22/191.27/124.18	21522/43914	191.27	32718	7.4108	8405.5	4080.2	509.21	1	0	0	0	TRUE
Tada2a_55005	Tada2a	0.65558/0/12.196	81.079/1556.7	0.65558	818.88	8.9519	66.81	2.5846	508.96	1	0	0	0	TRUE
Bcl9_43656	Bcl9	0.65558/6.0721/158.55	5.0675/6774.5	6.0721	3389.8	8.9053	11640	44.202	508.95	1	0	0	0	TRUE
Xlr_18957	Xlr	7.8669/36.433/190.71	2650.3/19180	36.433	10915	8.1879	12308	457.56	508.57	1	0	0	0	TRUE
Kremen2_39059	Kremen2	15.078/8.0962/7.7613	1094.6/7062.7	8.0962	4078.7	8.809	24.431	64.169	508.15	1	0	0	0	TRUE
Prokr2_63716	Prokr2	24.912/63.757/68.743	13064/18450	63.757	15757	7.9268	766.91	955.46	507.69	1	0	0	0	TRUE
Apol7a_42154	Apol7a	63.591/28.337/33.263	3679/16845	33.263	10262	8.2266	472.04	406.02	507.63	1	0	0	0	TRUE
Gstcd_31021	Gstcd	91.781/137.63/150.79	11047/41348	137.63	26198	7.5621	1137.8	2639.3	507.26	1	0	0	0	TRUE
Magi1_7150	Magi1	138.33/102.21/80.94	18770/24234	102.21	21502	7.7028	878.38	1781.1	507.08	1	0	0	0	TRUE
Mat2b_49041	Mat2b	82.603/55.661/72.07	12805/21323	72.07	17064	7.8676	190.1	1123	507.06	1	0	0	0	TRUE
Slc39a5_37802	Slc39a5	54.413/115.37/207.34	9167/37408	115.37	23288	7.6448	6087	2090.1	506.86	1	0	0	0	TRUE
Lrrc41_58425	Lrrc41	31.468/7.0841/2.2175	2077.7/5381.1	7.0841	3729.4	8.85	309.12	53.966	506.7	1	0	0	0	TRUE
Ep400_41832	Ep400	57.691/92.094/124.18	3765.1/36255	92.094	20010	7.7479	1106.6	1551.9	505.6	1	0	0	0	TRUE
Tbc1d1_26003	Tbc1d1	20.323/23.276/16.631	5133.3/9657.2	20.323	7395.3	8.4382	11.175	212.89	505.46	1	0	0	0	TRUE
Slc1a4_23941	Slc1a4	176.35/76.913/210.66	17478/43991	176.35	30734	7.4371	5532.6	3664.1	504.82	1	0	0	0	TRUE
Adcy2_52923	Adcy2	7.2114/0/0	141.89/1479.8	0.65558	810.85	8.9377	26.002	2.5846	503.96	1	0	0	0	TRUE
Rlim_14788	Rlim	4.5891/0/0	1621.6/0	0.65558	810.79	8.9376	10.53	2.5846	503.93	1	0	0	0	TRUE
Il1f8_34816	Il1f8	0.65558/1.012/0	15.202/1604.7	0.65558	809.97	8.9362	0.27842	2.5846	503.41	1	0	0	0	TRUE
Mpv17l_45770	Mpv17l	57.691/16.192/25.502	5736.4/11358	25.502	8547.2	8.3334	561.41	286.56	503.41	1	0	0	0	TRUE
Osbpl11_48272	Osbpl11	4.5891/3.0361/25.502	1500/4093.5	4.5891	2796.7	8.9674	219.87	30.785	503.24	1	0	0	0	TRUE
Mllt10_10724	Mllt10	34.746/52.625/44.351	1180.7/23398	44.351	12290	8.0822	80.36	592.51	503.06	1	0	0	0	TRUE
Jarid2_8952	Jarid2	47.202/41.493/46.568	3015.1/22351	46.568	12683	8.0588	13.08	631.78	502.74	1	0	0	0	TRUE
Cpz_62630	Cpz	44.579/113.35/22.175	5229.6/19411	44.579	12320	8.0785	2615.4	596.54	502.6	1	0	0	0	TRUE
Arhgap28_68117	Arhgap28	25.568/29.349/33.263	886.81/17825	29.349	9355.9	8.2683	14.809	344.51	502.48	1	0	0	0	TRUE
Larp4b_55474	Larp4b	1.9667/15.18/15.523	815.86/11329	15.18	6072.5	8.5522	87.358	145.41	502.32	1	0	0	0	TRUE
2210018M11Rik_59784	2210018M11Rik	111.45/101.2/31.045	10677/31624	101.2	21150	7.6932	2513.5	1757.8	502.06	1	0	0	0	TRUE
Svs1_62736	Svs1	87.848/173.06/150.79	7819.1/47171	150.79	27495	7.501	2228.8	2978.2	501.06	1	0	0	0	TRUE
Hic2_26038	Hic2	224.21/152.81/131.94	12268/43145	152.81	27707	7.493	2766.3	3031.2	500.47	1	0	0	0	TRUE
Cbln2_2199	Cbln2	212.41/50.601/210.66	24491/44087	210.66	34289	7.3399	12812	4637.1	500.44	1	0	0	0	TRUE
Psca_38411	Psca	53.757/5.0601/7.7613	4829.3/2978.8	7.7613	3904.1	8.8	1061.5	60.747	499.91	1	0	0	0	TRUE
Camta2_54940	Camta2	135.05/191.27/241.71	14305/49852	191.27	32079	7.3824	2852.5	4080.2	499.21	1	0	0	0	TRUE
Rpp25l_35232	Rpp25l	1.3112/8.0962/5.5438	329.38/5928.9	5.5438	3129.1	8.9019	12.215	39.293	498.3	1	0	0	0	TRUE
Bet1l_23564	Bet1l	24.256/65.781/117.53	2771.9/28799	65.781	15785	7.885	2201.1	995.64	498.18	1	0	0	0	TRUE
Vmn1r44_50185	Vmn1r44	13.767/37.445/35.48	1966.2/19045	35.48	10506	8.17	237.66	441.92	498.07	1	0	0	0	TRUE
Etf1_56600	Etf1	0/9.1082/26.61	5.0675/8619.4	9.1082	4312.2	8.7371	194.64	74.771	497.64	1	0	0	0	TRUE
Mllt4_10732	Mllt4	655.58/250.98/490.07	34834/84801	490.07	59817	6.9285	42279	14218	497.55	1	0	0	0	TRUE
Cyp2j13_58341	Cyp2j13	27.534/51.613/15.523	846.27/16922	27.534	8884	8.2825	362.03	316.86	497.54	1	0	0	0	TRUE
Spert_31908	Spert	22.29/16.192/7.7613	5589.4/6957	16.192	6273.2	8.5115	54.13	158.19	497.48	1	0	0	0	TRUE
Tnk1_45412	Tnk1	16.389/26.312/125.29	1611.5/15625	26.312	8618	8.3018	4947.5	298.56	497.24	1	0	0	0	TRUE
Wsb2_26485	Wsb2	5.2446/7.0841/41.024	1525.3/5794.3	7.0841	3659.8	8.8229	577.66	53.966	497.23	1	0	0	0	TRUE
Hcar1_62673	Hcar1	23.601/17.204/13.305	744.92/12300	17.204	6522.3	8.4852	28.059	171.23	497.13	1	0	0	0	TRUE
Kcnmb1_9130	Kcnmb1	38.024/1.012/6.6526	5234.7/1777.7	6.6526	3506.2	8.8402	507.98	49.746	496.17	1	0	0	0	TRUE
Olfr1297_66819	Olfr1297	94.403/158.89/102.01	10545/31460	102.01	21003	7.6718	1646.6	1776.3	495.92	1	0	0	0	TRUE
Ptprm_14153	Ptprm	0.65558/0/0	192.56/1402.9	0.65558	797.75	8.9143	0.21489	2.5846	495.81	1	0	0	0	TRUE
4430402I18Rik_72243	4430402I18Rik	30.812/10.12/12.196	4945.8/5438.8	12.196	5192.3	8.6204	175.43	109.32	495.45	1	0	0	0	TRUE
Ffar3_59625	Ffar3	34.09/66.793/72.07	4276.9/27415	66.793	15846	7.8688	548.67	1015.9	495.07	1	0	0	0	TRUE
Tnr_17917	Tnr	402.53/272.23/184.05	11285/69157	272.23	40221	7.2017	12376	6514.2	494.96	1	0	0	0	TRUE
Krtap4-2_33233	Krtap4-2	0/7.0841/4.4351	638.5/4737.3	4.4351	2687.9	8.9505	13.344	29.459	494.41	1	0	0	0	TRUE
Vps11_37148	Vps11	107.51/0/3.3263	1935.8/2527.2	3.3263	2231.5	9.0113	5433.2	20.343	494.02	1	0	0	0	TRUE
Tyrobp_18312	Tyrobp	23.601/18.216/14.414	3025.3/10416	18.216	6720.8	8.4504	21.726	184.51	493.44	1	0	0	0	TRUE
Ccdc50_30919	Ccdc50	29.501/72.865/87.592	3952.6/29500	72.865	16726	7.8231	1048.7	1139.4	493.37	1	0	0	0	TRUE
Cd59a_2467	Cd59a	25.568/4.0481/7.7613	5148.5/2556	7.7613	3852.3	8.7807	165.43	60.747	493.26	1	0	0	0	TRUE
Atat1_39255	Atat1	6.5558/5.0601/13.305	562.49/6322.8	6.5558	3442.7	8.8321	23.896	48.811	491.82	1	0	0	0	TRUE
Lrrc29_60194	Lrrc29	6.5558/11.132/15.523	3390.1/6313.2	11.132	4851.7	8.6438	20.11	97.064	491.32	1	0	0	0	TRUE
Olfr1176_66415	Olfr1176	57.035/59.709/111.99	4920.5/24273	59.709	14597	7.9096	1370	876.35	491.06	1	0	0	0	TRUE
Ccl20_15390	Ccl20	0.65558/25.3/9.9789	1119.9/7908.3	9.9789	4514.1	8.6839	160.84	84.191	490.89	1	0	0	0	TRUE
Celf2_5193	Celf2	24.912/7.0841/14.414	6430.6/5025.6	14.414	5728.1	8.5379	81.968	135.91	490.11	1	0	0	0	TRUE
Btrc_1770	Btrc	0.65558/8.0962/6.6526	430.73/6495.8	6.6526	3463.3	8.8224	19.024	49.746	490.08	1	0	0	0	TRUE
Best1_19998	Best1	49.824/21.252/43.242	4271.9/19266	43.242	11769	8.0555	263.43	573.11	489.81	1	0	0	0	TRUE
Klk11_25057	Klk11	160.62/126.5/111.99	18233/29587	126.5	23910	7.551	687.27	2360.7	489.49	1	0	0	0	TRUE
Hectd2_56842	Hectd2	91.781/82.986/51.003	5346.2/30749	82.986	18048	7.7475	550.12	1352.6	488.46	1	0	0	0	TRUE
Rprd1a_56565	Rprd1a	212.41/63.757/49.894	6491.4/23812	63.757	15151	7.8703	11145	955.46	488.11	1	0	0	0	TRUE
F10_5279	F10	23.601/35.421/14.414	3749.9/11992	23.601	7871.1	8.3219	112.05	258.91	487.7	1	0	0	0	TRUE
Thnsl1_52627	Thnsl1	537.57/402.78/166.31	20315/82581	402.78	51448	6.9934	37043	10956	487.67	1	0	0	0	TRUE
Gm428_62421	Gm428	37.368/17.204/18.849	577.69/13001	18.849	6789.4	8.4183	172.83	192.93	487.45	1	0	0	0	TRUE
Spz1_44656	Spz1	0/5.0601/1.1088	212.83/1969.9	1.1088	1091.4	9.0168	8.4212	5.0105	487.06	1	0	0	0	TRUE
Smyd5_59194	Smyd5	127.18/92.094/82.048	7302.2/31249	92.094	19276	7.694	666.06	1551.9	486.96	1	0	0	0	TRUE
Tmem120a_54305	Tmem120a	7.8669/19.228/17.74	2898.6/10138	17.74	6518.1	8.4424	49.848	178.23	486.91	1	0	0	0	TRUE
Nlrp10_63034	Nlrp10	0/0/1.1088	0/1566.3	0.65558	783.15	8.8876	0.61468	2.5846	486.73	1	0	0	0	TRUE
Ddx26b_60776	Ddx26b	1.3112/21.252/22.175	2229.7/12434	21.252	7332	8.3643	199.25	225.72	486.61	1	0	0	0	TRUE
Tap2_17101	Tap2	21.634/5.0601/4.4351	5.0675/5746.3	5.0601	2875.7	8.8908	137.54	34.922	485.77	1	0	0	0	TRUE
Lta4h_10024	Lta4h	64.247/19.228/15.523	9491.4/4218.4	19.228	6854.9	8.4048	1020.2	198.02	485.76	1	0	0	0	TRUE
Krtap4-9_76581	Krtap4-9	30.157/2.024/0	1474.6/1710.4	2.024	1592.5	9.0415	397.77	10.767	484.72	1	0	0	0	TRUE
Zfp942_39250	Zfp942	38.024/148.77/31.045	4079.3/17287	38.024	10683	8.0969	6156.4	483.99	483.87	1	0	0	0	TRUE
Pdgfrl_33443	Pdgfrl	0.65558/9.1082/0	0/1556.7	0.65558	778.34	8.8788	35.938	2.5846	483.74	1	0	0	0	TRUE
Vamp2_18644	Vamp2	0/3.0361/0	0/1556.7	0.65558	778.34	8.8788	4.6088	2.5846	483.74	1	0	0	0	TRUE
BC029214_57376	BC029214	98.337/92.094/59.873	4008.4/34257	92.094	19133	7.6832	538.57	1551.9	483.32	1	0	0	0	TRUE
Arhgef33_72187	Arhgef33	0/6.0721/8.8701	0/6438.1	6.0721	3219.1	8.8307	22.35	44.202	483.27	1	0	0	0	TRUE
Ephx4_73070	Ephx4	53.757/32.385/19.958	6552.2/12646	32.385	9598.9	8.1677	305.61	392	483.18	1	0	0	0	TRUE
Trim10_14805	Trim10	255.02/276.28/181.84	23310/51668	255.02	37489	7.1941	2903.9	5973.7	481.75	1	0	0	0	TRUE
Pate4_25474	Pate4	62.28/106.26/80.94	6628.2/28385	80.94	17507	7.7392	494.7	1308.8	481.68	1	0	0	0	TRUE
Tcf21_17224	Tcf21	220.93/126.5/188.49	22778/38494	188.49	30636	7.337	2447.4	4001.8	481.31	1	0	0	0	TRUE
Tbx10_49512	Tbx10	14.423/13.156/22.175	1393.6/9849.4	14.423	5621.5	8.51	30.853	136.02	480.77	1	0	0	0	TRUE
Nova1_76465	Nova1	38.679/34.409/9.9789	5376.6/14500	34.409	9938.4	8.1329	307.53	424.48	480.71	1	0	0	0	TRUE
Dpep3_37436	Dpep3	72.114/20.24/38.807	4434/17056	38.807	10745	8.0766	727.03	497.13	480.18	1	0	0	0	TRUE
Dnm1_4348	Dnm1	0/6.0721/41.024	0/6390.1	6.0721	3195	8.8199	629.26	44.202	479.66	1	0	0	0	TRUE
Otx1_12402	Otx1	168.48/19.228/15.523	876.67/12655	19.228	6766	8.386	11145	198.02	479.45	1	0	0	0	TRUE
BC017158_59964	BC017158	188.81/441.24/226.19	13464/55387	226.19	34426	7.2435	23822	5095.3	479.11	1	0	0	0	TRUE
Rai1_14413	Rai1	19.012/25.3/14.414	1920.6/11493	19.012	6706.6	8.3888	30.344	195.11	478.77	1	0	0	0	TRUE
Plp2_13287	Plp2	25.568/20.24/12.196	1783.7/12184	20.24	6984.1	8.3613	46.542	211.76	478.55	1	0	0	0	TRUE
Fam188a_29590	Fam188a	272.72/149.78/131.94	10267/42021	149.78	26144	7.4379	7716.4	2951.7	478.45	1	0	0	0	TRUE
Etl4_52501	Etl4	14.423/62.745/39.915	4677.3/17133	39.915	10905	8.0583	585.54	515.87	478.38	1	0	0	0	TRUE
Ctse_3726	Ctse	216.34/97.154/176.29	7094.4/51111	176.29	29103	7.3589	3933.4	3662.5	477.98	1	0	0	0	TRUE
Zcchc13_41360	Zcchc13	389.41/388.62/425.76	25748/72818	389.41	49283	6.98	661.02	10476	477.7	1	0	0	0	TRUE
Ager_458	Ager	67.525/87.034/115.31	11513/24753	87.034	18133	7.6864	590.12	1440.4	475.5	1	0	0	0	TRUE
Lrfn2_35872	Lrfn2	194.05/49.589/151.9	11007/41425	151.9	26216	7.4218	6122.2	3007.2	475.29	1	0	0	0	TRUE
4930453N24Rik_31144	4930453N24Rik	6.5558/6.0721/0	3212.8/3113.4	6.0721	3163.1	8.8054	18.552	44.202	474.85	1	0	0	0	TRUE
Vmn1r175_75550	Vmn1r175	18.356/11.132/24.393	3440.8/9532.3	18.356	6486.6	8.3887	44.313	186.36	473.81	1	0	0	0	TRUE
Chrac1_45660	Chrac1	49.824/33.397/74.287	2599.6/22380	49.824	12490	7.9411	434.15	690.53	473.39	1	0	0	0	TRUE
Slxl1_41412	Slxl1	139.64/98.166/115.31	11716/31758	115.31	21737	7.5461	442.88	2088.7	473.11	1	0	0	0	TRUE
Shisa6_71947	Shisa6	1.9667/12.144/39.915	10.135/9878.2	12.144	4944.2	8.5554	437.41	108.71	473.04	1	0	0	0	TRUE
BC027072_56483	BC027072	57.691/18.216/37.698	3329.3/17431	37.698	10380	8.0675	389.63	478.55	472.78	1	0	0	0	TRUE
Kdm4c_43133	Kdm4c	375.65/266.16/272.76	29209/47738	272.76	38474	7.1349	5315	6530.8	472.7	1	0	0	0	TRUE
Pah_12492	Pah	4.5891/7.0841/5.5438	1530.4/4401	5.5438	2965.7	8.8245	1.6421	39.293	472.23	1	0	0	0	TRUE
Ubtfl1_75118	Ubtfl1	15.734/2.024/5.5438	597.96/5333.1	5.5438	2965.5	8.8244	58.113	39.293	472.2	1	0	0	0	TRUE
Chchd10_47486	Chchd10	0.65558/2.024/16.631	258.44/2844.3	2.024	1551.4	9.0038	107.62	10.767	472.18	1	0	0	0	TRUE
Btnl6_75704	Btnl6	0.65558/1.012/0	374.99/1143.5	0.65558	759.24	8.843	0.27842	2.5846	471.86	1	0	0	0	TRUE
Ctnnbl1_28841	Ctnnbl1	11.8/5.0601/11.088	2660.4/6630.3	11.088	4645.4	8.5864	18.42	96.558	471.62	1	0	0	0	TRUE
Bcar3_21466	Bcar3	59.002/29.349/15.523	1976.3/15576	29.349	8776.4	8.176	535.24	344.51	471.26	1	0	0	0	TRUE
Agk_35184	Agk	0/0/0	141.89/1374.1	0.65558	758	8.8406	0	2.5846	471.09	1	0	0	0	TRUE
Prr9_49471	Prr9	36.057/41.493/35.48	2949.3/17133	36.057	10041	8.0821	14.941	451.37	470.93	1	0	0	0	TRUE
Snx12_23982	Snx12	8.5225/23.276/66.526	1565.8/13482	23.276	7523.8	8.2759	1044.1	254.26	470.38	1	0	0	0	TRUE
Nme2_11712	Nme2	134.39/51.613/47.677	9643.4/15749	51.613	12696	7.9149	3434.1	723.35	470.15	1	0	0	0	TRUE
Cdc42se1_25992	Cdc42se1	38.024/18.216/38.807	4393.5/16326	38.024	10360	8.0526	196.47	483.99	469.17	1	0	0	0	TRUE
Dkkl1_21937	Dkkl1	12.456/8.0962/5.5438	1986.4/5544.5	8.0962	3765.5	8.6937	12.761	64.169	469.05	1	0	0	0	TRUE
Vmn1r91_76708	Vmn1r91	13.767/12.144/6.6526	1662.1/8139	12.144	4900.5	8.5427	16.396	108.71	468.85	1	0	0	0	TRUE
Atp5b_1260	Atp5b	0/4.0481/0	0/1508.6	0.65558	754.32	8.8336	8.1935	2.5846	468.8	1	0	0	0	TRUE
Bcl2l13_45989	Bcl2l13	0.65558/1.012/0	354.72/1153.1	0.65558	753.91	8.8328	0.27842	2.5846	468.54	1	0	0	0	TRUE
Vmn1r120_74561	Vmn1r120	11.8/24.288/17.74	1494.9/11051	17.74	6272.7	8.387	39.08	178.23	468.53	1	0	0	0	TRUE
Olfr448_64612	Olfr448	125.87/79.95/222.86	7535.3/38072	125.87	22803	7.4898	5757.9	2345.2	468.28	1	0	0	0	TRUE
Tceal3_75341	Tceal3	6.5558/23.276/7.7613	1525.3/5784.7	7.7613	3655	8.7049	121.09	60.747	467.95	1	0	0	0	TRUE
Gmeb1_25400	Gmeb1	507.42/432.13/352.59	32265/71146	432.13	51705	6.8994	5997.7	12029	467.49	1	0	0	0	TRUE
Rapsn_14445	Rapsn	110.79/85.01/111.99	11574/30259	110.79	20917	7.5478	333.1	1981.2	467.44	1	0	0	0	TRUE
Wnt4_18902	Wnt4	26.879/23.276/34.372	5640.1/10791	26.879	8215.6	8.2032	34.56	307	467.35	1	0	0	0	TRUE
A230046K03Rik_69386	A230046K03Rik	0/4.0481/11.088	486.48/4304.9	4.0481	2395.7	8.8911	32.971	26.189	467.34	1	0	0	0	TRUE
Cpne1_67806	Cpne1	44.579/11.132/57.656	5944.1/16970	44.579	11457	7.9738	644.85	596.54	467.26	1	0	0	0	TRUE
Tmem42_27391	Tmem42	72.769/16.192/22.175	1743.2/12732	22.175	7237.7	8.287	1297.8	238.63	467.1	1	0	0	0	TRUE
Lin28b_71920	Lin28b	3.9335/5.0601/3.3263	430.73/4266.5	3.9335	2348.6	8.8956	0.81898	25.238	466.71	1	0	0	0	TRUE
control_78954	control	148.16/223.66/280.52	17006/49554	223.66	33280	7.2109	4466.4	5019.8	466.57	1	0	0	0	TRUE
Gm3646_77652	Gm3646	3.9335/4.0481/3.3263	562.49/4131.9	3.9335	2347.2	8.8947	0.1909	25.238	466.44	1	0	0	0	TRUE
Csf2rb2_3600	Csf2rb2	8.5225/4.0481/8.8701	5.0675/7735.4	8.5225	3870.2	8.6672	10.071	68.589	466.29	1	0	0	0	TRUE
Vmn2r86_75748	Vmn2r86	32.123/144.72/19.958	4429/14001	32.123	9214.8	8.1201	6412.9	387.86	466.26	1	0	0	0	TRUE
Olfr690_25451	Olfr690	9.1781/13.156/93.136	2782/7466.3	13.156	5124.2	8.5	3206.3	120.66	465.3	1	0	0	0	TRUE
Lct_56968	Lct	957.8/513.09/393.61	43844/71550	513.09	57697	6.8103	106020	15112	465.17	1	0	0	0	TRUE
Ccnk_2303	Ccnk	138.33/332.95/393.61	9162/77190	332.95	43176	7.0145	20779	8509.1	464.45	1	0	0	0	TRUE
Ttll2_78170	Ttll2	26.879/20.24/45.459	30.405/16297	26.879	8163.8	8.1941	194.65	307	464.39	1	0	0	0	TRUE
Prss28_50354	Prss28	6.5558/52.625/9.9789	1494.9/7043.5	9.9789	4269.2	8.6034	915.2	84.191	464.19	1	0	0	0	TRUE
Dnase1l3_4328	Dnase1l3	31.468/43.517/22.175	4342.8/13751	31.468	9046.8	8.1224	115.77	377.51	464	1	0	0	0	TRUE
Iqgap2_74796	Iqgap2	32.123/29.349/19.958	2913.8/14337	29.349	8625.3	8.151	47.944	344.51	463.12	1	0	0	0	TRUE
Gpd1_6290	Gpd1	0/1.012/0	0/1489.4	0.65558	744.71	8.8151	0.51209	2.5846	462.82	1	0	0	0	TRUE
Tceal1_60829	Tceal1	27.534/39.469/27.719	2478/14125	27.719	8301.7	8.1754	69.044	319.65	462.79	1	0	0	0	TRUE
Cmbl_34639	Cmbl	0/13.156/3.3263	0/4180	3.3263	2090	8.9168	53.846	20.343	462.65	1	0	0	0	TRUE
Il12rb2_8478	Il12rb2	32.123/20.24/32.154	3456/14808	32.123	9131.9	8.1071	70.603	387.86	462.05	1	0	0	0	TRUE
Hoxc4_7849	Hoxc4	13.767/21.252/22.175	4200.9/9724.5	21.252	6962.7	8.2897	28.44	225.72	462.03	1	0	0	0	TRUE
Wdr1_18835	Wdr1	11.8/5.0601/0	0/5467.6	5.0601	2733.8	8.8179	35.518	34.922	461.76	1	0	0	0	TRUE
Tspo_1792	Tspo	87.848/59.709/59.873	4667.1/22841	59.873	13754	7.8199	391.3	879.53	461.76	1	0	0	0	TRUE
Rbpms2_37721	Rbpms2	1.3112/12.144/26.61	0/9647.6	12.144	4823.8	8.5199	163.31	108.71	461.49	1	0	0	0	TRUE
Lemd3_71913	Lemd3	346.15/91.082/86.484	9303.9/26954	91.082	18129	7.6212	32539	1529.5	461.22	1	0	0	0	TRUE
Vdac1_18684	Vdac1	224.21/62.745/46.568	11098/17181	62.745	14139	7.7933	13166	935.53	460.23	1	0	0	0	TRUE
Ndufb9_27791	Ndufb9	0/0/0	65.877/1412.5	0.65558	739.21	8.8045	0	2.5846	459.4	1	0	0	0	TRUE
Rab7_14334	Rab7	87.848/69.829/52.112	12760/17460	69.829	15110	7.737	319.28	1077.2	458.25	1	0	0	0	TRUE
Fitm2_57818	Fitm2	0/14.168/6.6526	0/6476.6	6.6526	3238.3	8.7255	50.371	49.746	458.19	1	0	0	0	TRUE
Cth_48775	Cth	75.392/14.168/7.7613	5265.1/5323.5	14.168	5294.3	8.4475	1894.7	132.9	458.02	1	0	0	0	TRUE
Cadm4_67728	Cadm4	91.781/235.8/90.919	7236.3/28952	91.781	18094	7.6076	10371	1545	458.01	1	0	0	0	TRUE
Vmn1r124_77004	Vmn1r124	239.94/197.34/181.84	15734/44394	197.34	30064	7.244	1027.5	4252.7	458	1	0	0	0	TRUE
Mrps7_21900	Mrps7	39.99/10.12/5.5438	4023.6/4477.9	10.12	4250.7	8.5787	456.58	85.745	457.96	1	0	0	0	TRUE
Slc27a5_20374	Slc27a5	11.8/3.0361/6.6526	466.21/6005.7	6.6526	3236	8.7245	19.79	49.746	457.86	1	0	0	0	TRUE
Adam25_19389	Adam25	118/65.781/35.48	4905.3/24090	65.781	14498	7.7623	1822.7	995.64	457.38	1	0	0	0	TRUE
Nck2_11407	Nck2	15.078/3.0361/9.9789	5.0675/8408	9.9789	4206.5	8.5821	37.103	84.191	457.36	1	0	0	0	TRUE
Zmiz1_70641	Zmiz1	51.791/42.505/55.438	6780.3/17969	51.791	12375	7.873	49.766	726.63	457.15	1	0	0	0	TRUE
Atg101_32339	Atg101	0/1.012/4.4351	30.405/1902.6	1.012	966.51	8.9095	6.3707	4.4643	456.96	1	0	0	0	TRUE
Prkcz_13108	Prkcz	0/0/3.3263	0/1470.2	0.65558	735.1	8.7964	5.5321	2.5846	456.84	1	0	0	0	TRUE
Olfr1411_65398	Olfr1411	53.102/27.325/46.568	2944.2/20093	46.568	11518	7.9199	206.5	631.78	456.41	1	0	0	0	TRUE
Colec12_50838	Colec12	8.5225/3.0361/5.5438	734.78/4996.8	5.5438	2865.8	8.7751	7.5808	39.293	456.29	1	0	0	0	TRUE
Gm11596_76979	Gm11596	38.024/182.16/57.656	3744.9/22716	57.656	13230	7.8175	7943.8	836.87	455.35	1	0	0	0	TRUE
Upk3a_18537	Upk3a	91.125/90.07/59.873	8893.4/26637	90.07	17765	7.6079	456.47	1507.1	455.29	1	0	0	0	TRUE
Wdr63_62338	Wdr63	130.46/87.034/120.86	12030/31114	120.86	21572	7.4679	618.08	2222.4	455.03	1	0	0	0	TRUE
Gsx2_7016	Gsx2	0.65558/6.0721/9.9789	613.16/5448.4	6.0721	3030.8	8.7438	22.301	44.202	454.95	1	0	0	0	TRUE
Emc2_29069	Emc2	14.423/151.8/8.8701	2255/8379.2	14.423	5317.1	8.4297	9452.1	136.02	454.67	1	0	0	0	TRUE
Fbxw5_21665	Fbxw5	18.356/18.216/9.9789	3704.3/8657.9	18.216	6181.1	8.3296	33.938	184.51	453.71	1	0	0	0	TRUE
Abhd6_27397	Abhd6	9.1781/15.18/16.631	2726.3/8244.7	15.18	5485.5	8.4055	19.066	145.41	453.64	1	0	0	0	TRUE
Cox17_3280	Cox17	1.3112/1.012/0	35.472/1883.4	1.012	959.43	8.8989	0.55683	4.4643	453.61	1	0	0	0	TRUE
Lsm8_42842	Lsm8	0.65558/25.3/44.351	1307.4/14001	25.3	7654	8.1852	485.14	283.6	453	1	0	0	0	TRUE
2010111I01Rik_37922	2010111I01Rik	3.9335/4.0481/28.828	775.32/3862.9	4.0481	2319.1	8.8442	307.02	26.189	452.38	1	0	0	0	TRUE
Gpr4_69343	Gpr4	42.613/152.81/155.23	13363/36736	152.81	25049	7.3475	6075.2	3031.2	452.2	1	0	0	0	TRUE
Odf1_12079	Odf1	17.045/15.18/27.719	3780.3/8014	17.045	5897.2	8.3525	58.706	169.16	452.1	1	0	0	0	TRUE
Cav1_2147	Cav1	68.836/439.22/237.28	10520/56569	237.28	33545	7.1374	34576	5429	452.04	1	0	0	0	TRUE
Asb1_27206	Asb1	7.8669/24.288/17.74	557.42/11531	17.74	6044.2	8.3335	70.18	178.23	451.41	1	0	0	0	TRUE
Ccz1_59086	Ccz1	13.112/65.781/28.828	4408.7/12204	28.828	8306.2	8.1216	806.28	336.52	451.22	1	0	0	0	TRUE
Chrnd_146	Chrnd	20.979/116.38/53.221	3689.1/21169	53.221	12429	7.8408	2514.5	753.15	450.95	1	0	0	0	TRUE
Slc13a3_50341	Slc13a3	43.268/63.757/36.589	2614.8/19065	43.268	10840	7.936	232.2	573.57	450.8	1	0	0	0	TRUE
Hist1h4a_70481	Hist1h4a	64.247/67.805/32.154	10976/17152	64.247	14064	7.752	521.3	965.14	450.64	1	0	0	0	TRUE
Ppm1d_23165	Ppm1d	11.145/7.0841/22.175	1834.4/7072.3	11.145	4453.4	8.5187	69.08	97.207	450.56	1	0	0	0	TRUE
Irgq_52962	Irgq	7.8669/8.0962/19.958	456.07/6755.2	8.0962	3605.7	8.6312	70.375	64.169	449.1	1	0	0	0	TRUE
Aqp8_994	Aqp8	11.8/7.0841/4.4351	15.202/6582.3	7.0841	3298.7	8.673	14.63	53.966	448.08	1	0	0	0	TRUE
Psg17_20303	Psg17	7.2114/11.132/13.305	506.75/8340.8	11.132	4423.8	8.5106	10.047	97.064	447.89	1	0	0	0	TRUE
Jam3_45455	Jam3	28.19/61.733/41.024	3719.5/17037	41.024	10378	7.9483	296.79	534.79	447.01	1	0	0	0	TRUE
Hacl1_25379	Hacl1	11.8/6.0721/8.8701	70.944/7533.6	8.8701	3802.3	8.59	8.2077	72.243	446.3	1	0	0	0	TRUE
Arl8a_33308	Arl8a	1.3112/2.024/5.5438	0/2930.8	2.024	1465.4	8.9216	6.4485	10.767	445.97	1	0	0	0	TRUE
Fam110c_47958	Fam110c	0/10.12/19.958	217.9/8052.5	10.12	4135.2	8.539	99.598	85.745	445.48	1	0	0	0	TRUE
Dkk2_25406	Dkk2	57.691/23.276/18.849	2270.2/11963	23.276	7116.8	8.1957	601.98	254.26	444.86	1	0	0	0	TRUE
Pus7l_44520	Pus7l	5.2446/15.18/44.351	1560.8/9196	15.18	5378.4	8.3771	474.81	145.41	444.76	1	0	0	0	TRUE
Manf_41227	Manf	7.2114/34.409/13.305	1479.7/8388.8	13.305	4934.3	8.4304	241.25	122.44	444.72	1	0	0	0	TRUE
H2afb1_32556	H2afb1	1.3112/2.024/8.8701	298.98/2623.3	2.024	1461.1	8.9174	23.688	10.767	444.68	1	0	0	0	TRUE
Cnrip1_71930	Cnrip1	8.5225/22.264/17.74	136.82/11771	17.74	5954	8.3118	52.717	178.23	444.66	1	0	0	0	TRUE
Srrd_35406	Srrd	113.42/46.553/83.157	6248.2/26598	83.157	16423	7.6085	1127.7	1356.3	443.68	1	0	0	0	TRUE
Cyp2c65_38299	Cyp2c65	7.8669/91.082/16.631	1819.2/9570.7	16.631	5695	8.3356	2809.8	163.82	443.65	1	0	0	0	TRUE
Trnau1ap_37284	Trnau1ap	19.012/14.168/13.305	3304/6947.4	14.168	5125.7	8.4008	12.102	132.9	443.4	1	0	0	0	TRUE
Dab2_3967	Dab2	88.503/51.613/218.43	6243.1/27963	88.503	17103	7.5782	9120.5	1472.6	443.38	1	0	0	0	TRUE
Eif5a2_52548	Eif5a2	49.168/62.745/154.12	1961.1/25282	62.745	13621	7.7395	4266.7	935.53	443.29	1	0	0	0	TRUE
Kcnq2_9144	Kcnq2	27.534/5.0601/4.4351	643.57/4602.8	5.0601	2623.2	8.7583	252.74	34.922	443.04	1	0	0	0	TRUE
Gng5_6680	Gng5	10.489/54.649/17.74	942.55/10916	17.74	5929.3	8.3058	707.42	178.23	442.8	1	0	0	0	TRUE
Gm4070_77773	Gm4070	45.235/41.493/28.828	6689/14010	41.493	10350	7.9283	87.202	542.83	442.43	1	0	0	0	TRUE
Gm17455_78198	Gm17455	190.12/29.349/28.828	4454.3/12002	29.349	8228.1	8.083	12924	344.51	441.72	1	0	0	0	TRUE
Fam50b_49037	Fam50b	0/2.024/18.849	0/2902	2.024	1451	8.9073	143.59	10.767	441.58	1	0	0	0	TRUE
Tmem254a_27274	Tmem254a	63.591/159.9/116.42	4885/35919	116.42	20402	7.441	2340.7	2115.2	441.07	1	0	0	0	TRUE
Avp_1363	Avp	28.845/38.457/38.807	3983/15644	38.457	9813.4	7.9585	46.249	491.24	441.03	1	0	0	0	TRUE
Dedd_17855	Dedd	1.9667/0/0	1418.9/0	0.65558	709.44	8.7452	1.934	2.5846	440.88	1	0	0	0	TRUE
Arl3_24542	Arl3	380.89/874.38/686.32	24988/1.0789e+05	686.32	66440	6.5949	64328	22248	440.84	1	0	0	0	TRUE
Ppp2cb_13577	Ppp2cb	137.02/175.08/89.81	11417/34007	137.02	22712	7.3625	1838.6	2623.6	440.73	1	0	0	0	TRUE
Dtwd1_34065	Dtwd1	182.91/0/0	1408.8/9.6092	0.65558	709.18	8.7447	16727	2.5846	440.72	1	0	0	0	TRUE
Hes6_23873	Hes6	36.057/58.697/32.154	3055.7/15721	36.057	9388.1	7.9851	263.91	451.37	440.19	1	0	0	0	TRUE
1700001L19Rik_34269	1700001L19Rik	256.99/89.058/136.38	14564/30576	136.38	22570	7.3602	8392.9	2607.5	439.33	1	0	0	0	TRUE
control_78740	control	217/157.87/185.16	8903.5/46393	185.16	27648	7.2145	879.01	3908.5	439.28	1	0	0	0	TRUE
Rfxap_51154	Rfxap	57.691/50.601/56.547	4494.8/20679	56.547	12587	7.7731	18.332	815.74	438.72	1	0	0	0	TRUE
AI413582_48370	AI413582	13.767/4.0481/0	537.15/3959	4.0481	2248.1	8.7994	55.424	26.189	438.49	1	0	0	0	TRUE
Hoxa2_7775	Hoxa2	184.87/25.3/32.154	3420.5/13924	32.154	8672.1	8.0312	11685	388.35	438.43	1	0	0	0	TRUE
Slc25a24_58148	Slc25a24	293.7/160.91/284.95	12871/60595	284.95	36733	7.0052	7731.3	6921	438.12	1	0	0	0	TRUE
Prrt3_53055	Prrt3	171.11/128.53/103.11	6055.6/37178	128.53	21617	7.3828	1229.4	2410.8	437.64	1	0	0	0	TRUE
Olfr1032_65711	Olfr1032	74.736/41.493/106.44	3861.4/26329	74.736	15095	7.639	1055.2	1178.1	437.62	1	0	0	0	TRUE
Gstt2_7081	Gstt2	61.624/38.457/41.024	7150.2/13165	41.024	10157	7.9172	215.48	534.79	437.45	1	0	0	0	TRUE
Slc2a10_50903	Slc2a10	30.812/4.0481/9.9789	2959.4/5073.6	9.9789	4016.5	8.5154	234.6	84.191	436.65	1	0	0	0	TRUE
Mas1_10339	Mas1	11.145/80.962/16.631	3222.9/7966	16.631	5594.5	8.31	2084.2	163.82	435.79	1	0	0	0	TRUE
Sobp_49386	Sobp	66.213/59.709/66.526	2472.9/25272	66.213	13873	7.6894	21.202	1004.3	435.66	1	0	0	0	TRUE
Mesdc2_31955	Mesdc2	28.19/8.0962/16.631	3881.7/7293.4	16.631	5587.5	8.3082	103.22	163.82	435.25	1	0	0	0	TRUE
Kirrel_50958	Kirrel	3.9335/12.144/25.502	3111.4/5986.5	12.144	4549	8.4353	122.92	108.71	435.13	1	0	0	0	TRUE
Ywhaz_19046	Ywhaz	154.06/151.8/120.86	8705.9/39273	151.8	23989	7.2946	481.43	3004.6	434.87	1	0	0	0	TRUE
Asprv1_31692	Asprv1	43.268/7.0841/21.066	5219.5/7812.3	21.066	6515.9	8.2062	344.21	223.14	434.79	1	0	0	0	TRUE
Gprc5d_45794	Gprc5d	56.38/22.264/33.263	6714.4/10868	33.263	8791.2	8.0034	327.68	406.02	434.64	1	0	0	0	TRUE
Rnf150_71265	Rnf150	6.5558/17.204/22.175	1089.5/10311	17.204	5700.1	8.2908	69.051	171.23	434.29	1	0	0	0	TRUE
4930427A07Rik_47896	4930427A07Rik	79.981/39.469/154.12	6988/24321	79.981	15654	7.5949	3568.8	1288.4	433.9	1	0	0	0	TRUE
Msl1_39972	Msl1	2.6223/2.024/6.6526	10.135/3353.6	2.6223	1681.9	8.8598	8.3005	14.994	433.67	1	0	0	0	TRUE
4931406C07Rik_36401	4931406C07Rik	25.568/50.601/41.024	3825.9/16307	41.024	10066	7.9042	165.31	534.79	433.52	1	0	0	0	TRUE
Mbp_10423	Mbp	24.256/53.637/130.83	2883.4/21140	53.637	12012	7.7805	3411.3	760.92	433.5	1	0	0	0	TRUE
Acvr1c_68239	Acvr1c	29.501/12.144/15.523	2057.4/8571.4	15.523	5314.4	8.3296	103.4	149.71	433.07	1	0	0	0	TRUE
Cobl_3141	Cobl	46.546/4.0481/9.9789	3065.8/4891.1	9.9789	3978.4	8.5017	686.17	84.191	432.5	1	0	0	0	TRUE
Nudt17_44147	Nudt17	51.791/20.24/27.719	5057.3/10455	27.719	7756.1	8.0774	317.69	319.65	432.27	1	0	0	0	TRUE
Clcf1_25219	Clcf1	7.8669/13.156/13.305	182.43/9340.1	13.156	4761.3	8.3941	13.999	120.66	432.26	1	0	0	0	TRUE
Arhgef10_60004	Arhgef10	32.123/15.18/51.003	5077.6/12002	32.123	8539.7	8.0104	321.76	387.86	431.99	1	0	0	0	TRUE
Gm14920_77262	Gm14920	79.325/20.24/48.786	4626.6/17835	48.786	11231	7.8176	873.74	671.66	431.46	1	0	0	0	TRUE
control_79382	control	8.5225/11.132/12.196	425.67/8090.9	11.132	4258.3	8.4556	3.9715	97.064	431.09	1	0	0	0	TRUE
Prp2_45172	Prp2	62.28/31.373/33.263	5021.9/12415	33.263	8718.4	7.9914	422.78	406.02	431.03	1	0	0	0	TRUE
Olfr867_63995	Olfr867	0.65558/2.024/11.088	765.19/2066	2.024	1415.6	8.8717	42.011	10.767	430.79	1	0	0	0	TRUE
Smpd1_16164	Smpd1	0/15.18/4.4351	562.49/4122.3	4.4351	2342.4	8.7521	67.565	29.459	430.76	1	0	0	0	TRUE
Olfr918_64990	Olfr918	14.423/60.721/16.631	582.76/10474	16.631	5528.4	8.2928	974.39	163.82	430.63	1	0	0	0	TRUE
Sntb2_16303	Sntb2	0.65558/13.156/7.7613	1565.8/5160.1	7.7613	3363	8.5848	39.798	60.747	430.48	1	0	0	0	TRUE
Il22ra1_58581	Il22ra1	95.715/51.613/58.764	6126.6/19209	58.764	12668	7.7278	708.23	858.13	430.43	1	0	0	0	TRUE
Mcam_45481	Mcam	5.2446/2.024/17.74	967.89/4247.3	5.2446	2607.6	8.7064	83.256	36.575	430.3	1	0	0	0	TRUE
Pknox2_52339	Pknox2	22.29/4.0481/6.6526	2447.6/3632.3	6.6526	3039.9	8.6343	125.65	49.746	430.06	1	0	0	0	TRUE
Spink8_44333	Spink8	4.5891/33.397/9.9789	1119.9/6784.1	9.9789	3952	8.4921	288.72	84.191	429.62	1	0	0	0	TRUE
Stard13_62712	Stard13	0/9.1082/9.9789	65.877/7379.8	9.1082	3722.9	8.5251	41.858	74.771	429.48	1	0	0	0	TRUE
Stk24_55858	Stk24	135.05/178.12/114.2	7687.3/36150	135.05	21919	7.3319	1144.6	2573.9	429.37	1	0	0	0	TRUE
Acsm1_50571	Acsm1	235.35/61.733/39.915	8224.5/17863	61.733	13044	7.7	15310	915.7	429.02	1	0	0	0	TRUE
Cd9_2533	Cd9	41.957/34.409/54.329	3613.1/16576	41.957	10094	7.8766	105.03	550.83	428.32	1	0	0	0	TRUE
Ifnz_69167	Ifnz	33.435/15.18/12.196	2655.3/7687.3	15.18	5171.3	8.3204	171.06	145.41	427.59	1	0	0	0	TRUE
Olfr449_67445	Olfr449	174.38/130.55/160.77	11300/37678	160.77	24489	7.2421	549.29	3241.8	427.29	1	0	0	0	TRUE
Zbtb6_62109	Zbtb6	0/0/28.828	0/1374.1	0.65558	687.06	8.699	415.52	2.5846	426.96	1	0	0	0	TRUE
Hbegf_7467	Hbegf	0/2.024/5.5438	0/2805.9	2.024	1402.9	8.8588	8.2428	10.767	426.94	1	0	0	0	TRUE
Rdh5_14571	Rdh5	9.8337/29.349/22.175	197.63/13030	22.175	6613.8	8.157	101.89	238.63	426.71	1	0	0	0	TRUE
Slc6a15_47457	Slc6a15	270.1/20.24/23.284	1930.7/11723	23.284	6826.9	8.1353	30463	254.37	426.59	1	0	0	0	TRUE
Tpbg_17956	Tpbg	66.869/23.276/18.849	2128.3/11512	23.276	6820.1	8.1343	959.96	254.26	426.25	1	0	0	0	TRUE
Plekhm3_62022	Plekhm3	65.558/32.385/44.351	6202.6/14625	44.351	10414	7.8433	296.47	592.51	426	1	0	0	0	TRUE
Wdfy3_38080	Wdfy3	19.667/40.481/31.045	2518.5/13943	31.045	8230.7	8.0049	109.24	370.87	425.78	1	0	0	0	TRUE
Gcgr_6241	Gcgr	47.202/24.288/18.849	9537/4468.3	24.288	7002.6	8.1135	277.3	268.83	425.61	1	0	0	0	TRUE
Gnb1_6629	Gnb1	98.992/48.577/166.31	9780.2/25541	98.992	17661	7.4646	3537	1707.3	425.02	1	0	0	0	TRUE
Slc30a5_33830	Slc30a5	47.202/59.709/177.4	8057.3/17220	59.709	12638	7.7018	7004	876.35	424.91	1	0	0	0	TRUE
Cyp4a30b_74513	Cyp4a30b	0.65558/8.0962/18.849	1190.9/5631	8.0962	3410.9	8.5511	85.493	64.169	424.79	1	0	0	0	TRUE
Tnks_17881	Tnks	27.534/30.361/18.849	1951/13222	27.534	7586.6	8.0548	41.711	316.86	424.65	1	0	0	0	TRUE
Spats2l_30201	Spats2l	104.89/168/149.68	14174/32229	149.68	23201	7.2666	1170.8	2949.2	424.47	1	0	0	0	TRUE
D630039A03Rik_62417	D630039A03Rik	15.734/0/4.4351	0/4612.4	4.4351	2306.2	8.7296	73.667	29.459	424.08	1	0	0	0	TRUE
Btbd6_73437	Btbd6	130.46/34.409/63.199	4150.3/22034	63.199	13092	7.672	2676.5	944.47	423.95	1	0	0	0	TRUE
Cfl2_2777	Cfl2	7.8669/8.0962/25.502	1003.4/5803.9	8.0962	3403.6	8.548	151.5	64.169	423.89	1	0	0	0	TRUE
Gmcl1_19559	Gmcl1	8.5225/27.325/9.9789	618.23/7158.8	9.9789	3888.5	8.4687	151.5	84.191	422.7	1	0	0	0	TRUE
Llgl1_9880	Llgl1	62.28/23.276/16.631	5574.2/7946.8	23.276	6760.5	8.1216	782.72	254.26	422.52	1	0	0	0	TRUE
Cenpu_37490	Cenpu	2.6223/0/2.2175	0/2940.4	2.2175	1470.2	8.8368	2.5406	12.099	422.04	1	0	0	0	TRUE
Gstp1_7070	Gstp1	5.9002/6.0721/2.2175	1049/4468.3	5.9002	2758.6	8.6436	6.7959	42.59	421.8	1	0	0	0	TRUE
Cdh2_2598	Cdh2	3.2779/10.12/14.414	1793.9/6034.6	10.12	3914.2	8.4598	32.627	85.745	421.62	1	0	0	0	TRUE
Mrgprf_53272	Mrgprf	0.65558/10.12/4.4351	0/4583.6	4.4351	2291.8	8.7206	23.303	29.459	421.43	1	0	0	0	TRUE
Txlna_49542	Txlna	15.734/31.373/58.764	1530.4/14875	31.373	8202.7	7.9854	497.44	376.01	421.4	1	0	0	0	TRUE
Rfwd2_20103	Rfwd2	0/0/6.6526	10.135/1345.3	0.65558	677.71	8.6793	22.128	2.5846	421.14	1	0	0	0	TRUE
Pacsin3_44774	Pacsin3	3.2779/26.312/39.915	998.29/13607	26.312	7302.4	8.0629	357.82	298.56	421.1	1	0	0	0	TRUE
Ifna15_62439	Ifna15	43.268/48.577/27.719	6947.5/13299	43.268	10123	7.8373	134.98	573.57	420.89	1	0	0	0	TRUE
Slc3a2_10546	Slc3a2	11.8/46.553/13.305	1657.1/7677.7	13.305	4667.4	8.3502	553.84	122.44	420.6	1	0	0	0	TRUE
Cep95_69911	Cep95	51.135/41.493/27.719	1930.7/17710	41.493	9820.2	7.8525	141.35	542.83	419.71	1	0	0	0	TRUE
Ppargc1a_13500	Ppargc1a	29.501/43.517/53.221	1667.2/18594	43.517	10130	7.8303	145.3	577.91	419.59	1	0	0	0	TRUE
Egln2_50120	Egln2	39.335/14.168/16.631	3922.2/6812.9	16.631	5367.6	8.2502	260.75	163.82	418.07	1	0	0	0	TRUE
Hdhd3_38841	Hdhd3	162.58/170.02/216.21	8695.8/40983	170.02	24839	7.1824	1094.4	3490.9	417.53	1	0	0	0	TRUE
Jun_8967	Jun	13.112/12.144/67.635	1920.6/7245.3	13.112	4582.9	8.3436	1486.8	120.12	416.95	1	0	0	0	TRUE
Nlrc4_68122	Nlrc4	127.18/196.33/100.9	12760/28136	127.18	20448	7.3177	2736.3	2377.5	416.75	1	0	0	0	TRUE
Lcor_53457	Lcor	190.12/46.553/69.852	7591.1/19910	69.852	13751	7.6006	7503.4	1077.7	416.75	1	0	0	0	TRUE
Efna1_4704	Efna1	63.591/97.154/108.66	8670.4/25532	97.154	17101	7.4449	629.41	1665.5	416.65	1	0	0	0	TRUE
Nuak1_43923	Nuak1	13.767/11.132/19.958	1576/7879.5	13.767	4727.7	8.3229	22.633	128.01	416.64	1	0	0	0	TRUE
Engase_55228	Engase	3.9335/21.252/15.523	319.25/9897.4	15.523	5108.3	8.2725	83.57	149.71	416.23	1	0	0	0	TRUE
1700007K09Rik_34278	1700007K09Rik	181.6/70.841/57.656	16170/11541	70.841	13855	7.5915	6220.2	1097.8	416.03	1	0	0	0	TRUE
Mapk15_71401	Mapk15	49.824/10.12/15.523	5726.2/4468.3	15.523	5097.2	8.2694	602.88	149.71	415.32	1	0	0	0	TRUE
2010109I03Rik_29795	2010109I03Rik	19.667/165.97/23.284	3233/10061	23.284	6646.9	8.0968	10186	254.37	415.3	1	0	0	0	TRUE
Tex13_45292	Tex13	63.591/133.59/53.221	5751.6/19997	63.591	12874	7.639	2503.4	952.19	415.15	1	0	0	0	TRUE
Zfp955b_77968	Zfp955b	0/7.0841/0	0/1335.7	0.65558	667.84	8.6582	25.092	2.5846	415	1	0	0	0	TRUE
Rasa4_23318	Rasa4	0/26.312/12.196	25.337/8677.1	12.196	4351.2	8.3655	174.01	109.32	415	1	0	0	0	TRUE
Cdh16_2593	Cdh16	0/20.24/9.9789	86.147/7543.2	9.9789	3814.7	8.4411	102.44	84.191	414.65	1	0	0	0	TRUE
Prss57_39134	Prss57	81.292/41.493/58.764	4651.9/19670	58.764	12161	7.6689	402.9	858.13	413.13	1	0	0	0	TRUE
AI314180_58298	AI314180	10.489/24.288/53.221	567.56/13011	24.288	6789.2	8.0688	513.74	268.83	412.59	1	0	0	0	TRUE
Dnaic1_33628	Dnaic1	46.546/34.409/28.828	4940.8/12117	34.409	8529	7.9123	89.232	424.48	412.3	1	0	0	0	TRUE
Zfp784_76415	Zfp784	182.91/136.62/65.417	12897/29442	136.62	21170	7.2652	3606.2	2613.7	411.41	1	0	0	0	TRUE
Ppp1ca_13552	Ppp1ca	0/0/3.3263	45.607/1278	0.65558	661.81	8.6451	5.5321	2.5846	411.26	1	0	0	0	TRUE
Grid1_6926	Grid1	15.078/11.132/21.066	1119.9/8782.8	15.078	4951.3	8.2669	25.715	144.14	411.16	1	0	0	0	TRUE
Deaf1_23234	Deaf1	62.28/66.793/97.571	4276.9/21976	66.793	13127	7.5972	483.82	1015.9	409.75	1	0	0	0	TRUE
Asns_20747	Asns	11.145/3.0361/6.6526	1449.3/4343.3	6.6526	2896.3	8.5646	16.63	49.746	409.7	1	0	0	0	TRUE
Mobp_10821	Mobp	150.13/83.998/64.308	2255/28289	83.998	15272	7.4894	2380.4	1374.4	409.68	1	0	0	0	TRUE
Trps1_45435	Trps1	906.67/539.41/622.02	19576/96053	622.02	57814	6.536	43925	19519	409.36	1	0	0	0	TRUE
Akap12_45191	Akap12	108.17/55.661/60.982	6633.3/18008	60.982	12320	7.6351	1127.5	901.05	408.41	1	0	0	0	TRUE
Vamp1_18641	Vamp1	38.024/53.637/44.351	3258.4/16710	44.351	9984.4	7.7826	63.135	592.51	408.35	1	0	0	0	TRUE
Mgmt_10666	Mgmt	77.358/168/52.112	6167.1/22649	77.358	14408	7.5227	4426.2	1232.9	408.13	1	0	0	0	TRUE
Olfr150_65803	Olfr150	65.558/100.19/88.701	11594/19920	88.701	15757	7.4568	333.8	1476.9	407.7	1	0	0	0	TRUE
Gjc2_50667	Gjc2	26.879/26.312/26.61	5.0675/14231	26.61	7118.1	8.0103	0.080372	302.99	407.4	1	0	0	0	TRUE
Spint4_44005	Spint4	148.82/281.34/29.937	16530/27847	148.82	22189	7.2106	15848	2926.7	407.4	1	0	0	0	TRUE
Zfp827_75602	Zfp827	90.47/123.47/103.11	5944.1/28818	103.11	17381	7.3833	287.04	1801.8	407.04	1	0	0	0	TRUE
Nodal_11757	Nodal	0/0/0	60.81/1249.2	0.65558	655	8.6302	0	2.5846	407.02	1	0	0	0	TRUE
Mgat3_10653	Mgat3	76.703/19.228/13.305	2229.7/9263.2	19.228	5746.5	8.1504	1669.2	198.02	407	1	0	0	0	TRUE
control_79085	control	34.09/1.012/4.4351	2655.3/1768.1	4.4351	2211.7	8.6693	445.57	29.459	406.68	1	0	0	0	TRUE
Hhex_7571	Hhex	13.767/4.0481/17.74	6106.3/3123	13.767	4614.6	8.288	55.123	128.01	406.64	1	0	0	0	TRUE
Zfp655_38683	Zfp655	0/2.024/7.7613	0/2671.3	2.024	1335.7	8.788	18.507	10.767	406.44	1	0	0	0	TRUE
Slc9a4_50047	Slc9a4	20.323/63.757/28.828	3957.7/11002	28.828	7480.1	7.9704	646.2	336.52	406.19	1	0	0	0	TRUE
Gfy_77333	Gfy	40.646/57.685/16.631	6673.8/12069	40.646	9371.5	7.8141	433.51	528.32	405.95	1	0	0	0	TRUE
Ptpn13_14074	Ptpn13	280.59/76.913/128.62	16525/23533	128.62	20029	7.2718	12884	2413.1	405.11	1	0	0	0	TRUE
Smpdl3b_46869	Smpdl3b	0.65558/10.12/2.2175	1748.3/1066.6	2.2175	1407.4	8.7739	32.446	12.099	404	1	0	0	0	TRUE
Tdp1_47939	Tdp1	7.2114/8.0962/9.9789	937.48/5544.5	8.0962	3241	8.4774	2.1637	64.169	403.58	1	0	0	0	TRUE
Nipal1_36075	Nipal1	37.368/20.24/8.8701	3891.8/7889.1	20.24	5890.5	8.1157	211.32	211.76	403.4	1	0	0	0	TRUE
Ip6k3_68710	Ip6k3	0/2.024/4.4351	101.35/2546.4	2.024	1323.9	8.7752	4.9549	10.767	402.85	1	0	0	0	TRUE
Igfn1_56993	Igfn1	8.5225/2.024/4.4351	0/4381.8	4.4351	2190.9	8.6557	11.26	29.459	402.84	1	0	0	0	TRUE
Vmn1r194_75812	Vmn1r194	115.38/123.47/139.7	6952.6/31768	123.47	19360	7.2813	164.51	2286.1	402.33	1	0	0	0	TRUE
Vmn2r74_75246	Vmn2r74	64.247/56.673/55.438	11128/11992	56.673	11560	7.6472	29.443	818.14	402.18	1	0	0	0	TRUE
Slc6a5_47758	Slc6a5	126.53/74.889/63.199	11655/16086	74.889	13870	7.514	1401.5	1181.3	401.38	1	0	0	0	TRUE
Xlr3c_18965	Xlr3c	101.61/20.24/17.74	2918.9/8792.4	20.24	5855.6	8.1071	3314	211.76	401	1	0	0	0	TRUE
Defb3_20958	Defb3	0/60.721/1.1088	0/1796.9	1.1088	898.46	8.7365	1777.4	5.0105	400.88	1	0	0	0	TRUE
Foxh1_5387	Foxh1	26.223/18.216/27.719	2285.4/11589	26.223	6937	7.9936	33.173	297.23	400.85	1	0	0	0	TRUE
Cplx2_3355	Cplx2	0/6.0721/5.5438	0/5035.2	5.5438	2517.6	8.5883	15.506	39.293	400.75	1	0	0	0	TRUE
Qrich1_34140	Qrich1	8.5225/77.925/14.414	3998.2/5371.5	14.414	4684.9	8.2479	2034.2	135.91	400.62	1	0	0	0	TRUE
Prl7d1_13260	Prl7d1	129.8/40.481/73.178	12385/14865	73.178	13625	7.5212	2137.8	1145.8	400.35	1	0	0	0	TRUE
Olfr860_65532	Olfr860	4.5891/12.144/4.4351	461.14/3987.8	4.5891	2224.5	8.6373	28.552	30.785	400.1	1	0	0	0	TRUE
control_79448	control	57.035/42.505/62.091	3846.2/19238	57.035	11542	7.6359	118.35	825.03	399.84	1	0	0	0	TRUE
Taar8b_72931	Taar8b	19.012/11.132/8.8701	3162.1/4737.3	11.132	3949.7	8.3471	33.602	97.064	399.77	1	0	0	0	TRUE
Mpi_49729	Mpi	16.389/4.0481/2.2175	2224.6/1873.8	4.0481	2049.2	8.6658	77.83	26.189	399.64	1	0	0	0	TRUE
Olfr943_64820	Olfr943	1.9667/6.0721/3.3263	907.08/2700.2	3.3263	1803.6	8.7044	4.694	20.343	399.15	1	0	0	0	TRUE
Gm1673_72545	Gm1673	8.5225/24.288/13.305	0/8859.7	13.305	4429.8	8.2749	71.753	122.44	399.13	1	0	0	0	TRUE
control_79419	control	35.401/54.649/33.263	3435.7/13386	35.401	8410.7	7.8523	187.52	440.63	398.99	1	0	0	0	TRUE
Wrb_36818	Wrb	51.791/13.156/2.2175	1682.4/7101.2	13.156	4391.8	8.2776	806.14	120.66	398.62	1	0	0	0	TRUE
2010002M12Rik_50144	2010002M12Rik	20.323/42.505/36.589	5158.7/12002	36.589	8580.3	7.8347	149.79	460.15	398.29	1	0	0	0	TRUE
Slco1b2_21418	Slco1b2	3.2779/10.12/13.305	1003.4/6370.9	10.12	3687.1	8.3736	28.481	85.745	397.09	1	0	0	0	TRUE
Olfr591_64359	Olfr591	0/0/4.4351	0/1278	0.65558	639.01	8.5946	9.8348	2.5846	397.07	1	0	0	0	TRUE
Slc45a4_48241	Slc45a4	418.91/135.61/218.43	10865/44894	218.43	27879	6.9894	23527	4864.8	396.58	1	0	0	0	TRUE
Zcchc24_37606	Zcchc24	127.18/56.673/187.38	8488/30413	127.18	19451	7.2455	4297.7	2377.5	396.29	1	0	0	0	TRUE
Fam20b_54246	Fam20b	73.425/22.264/29.937	5584.3/9378.5	29.937	7481.4	7.9181	975.04	353.59	396.27	1	0	0	0	TRUE
Gripap1_23783	Gripap1	83.259/71.853/62.091	17245/9378.5	71.853	13312	7.5136	112.69	1118.6	395.87	1	0	0	0	TRUE
Narf_31139	Narf	23.601/47.565/156.34	4626.6/15634	47.565	10130	7.7047	6202.7	649.63	395.59	1	0	0	0	TRUE
Rassf6_39264	Rassf6	10.489/9.1082/24.393	1398.6/6121	10.489	3759.8	8.3546	97.608	89.834	395.58	1	0	0	0	TRUE
Neu1_11493	Neu1	22.29/7.0841/9.9789	2954.3/4324.1	9.9789	3639.2	8.3732	79.968	84.191	395.53	1	0	0	0	TRUE
Baiap3_74848	Baiap3	26.879/1.012/1.1088	273.64/1499	1.1088	886.34	8.7169	332.05	5.0105	395.47	1	0	0	0	TRUE
Timp2_17678	Timp2	21.634/24.288/16.631	1981.4/10080	21.634	6030.7	8.0579	16.036	231.04	395.34	1	0	0	0	TRUE
Copz2_24566	Copz2	45.235/20.24/16.631	1079.4/10455	20.24	5767.1	8.0851	318.88	211.76	394.92	1	0	0	0	TRUE
Kdm2a_56740	Kdm2a	0/16.192/14.414	0/9224.8	14.414	4612.4	8.2255	105.46	135.91	394.4	1	0	0	0	TRUE
Tnfrsf11b_12308	Tnfrsf11b	8.5225/96.142/11.088	157.09/7610.5	11.088	3883.8	8.3282	3620.4	96.558	394.11	1	0	0	0	TRUE
Grcc10_6890	Grcc10	24.256/2.024/0	2589.5/0	2.024	1294.7	8.7431	249.19	10.767	393.96	1	0	0	0	TRUE
Qpct_35882	Qpct	53.102/3.0361/9.9789	4499.9/2738.6	9.9789	3619.3	8.3652	953.9	84.191	393.36	1	0	0	0	TRUE
Tmx3_32060	Tmx3	1.3112/15.18/13.305	364.86/8360	13.305	4362.4	8.2528	73.686	122.44	393.04	1	0	0	0	TRUE
Atic_49003	Atic	0/9.1082/1.1088	501.68/1258.8	1.1088	880.24	8.707	32.61	5.0105	392.75	1	0	0	0	TRUE
Sdr9c7_35332	Sdr9c7	36.712/22.264/42.133	3380/13578	36.712	8478.9	7.8129	119.06	462.18	392.69	1	0	0	0	TRUE
Rplp1_24055	Rplp1	28.845/1.012/29.937	5214.4/9253.6	28.845	7234	7.9213	387.95	336.79	392.62	1	0	0	0	TRUE
Crlf2_26001	Crlf2	6.5558/7.0841/14.414	1621.6/4160.8	7.0841	2891.2	8.4828	27.002	53.966	392.6	1	0	0	0	TRUE
Ttc28_52853	Ttc28	44.579/24.288/14.414	4043.8/8878.9	24.288	6461.4	7.9974	254.61	268.83	392.6	1	0	0	0	TRUE
Mon1b_68550	Mon1b	32.779/40.481/55.438	2255/15817	40.481	9035.9	7.7672	141.52	525.5	392.4	1	0	0	0	TRUE
Fbxo48_69612	Fbxo48	3.2779/7.0841/5.5438	2057.4/2873.1	5.5438	2465.3	8.558	3.7535	39.293	392.4	1	0	0	0	TRUE
Chil1_2825	Chil1	7.8669/3.0361/11.088	638.5/5534.9	7.8669	3086.7	8.4439	16.855	61.822	391.57	1	0	0	0	TRUE
Rnps1_14809	Rnps1	58.347/73.877/82.048	6116.4/20698	73.877	13407	7.4844	153.99	1160.3	391.43	1	0	0	0	TRUE
Olfr1367_65549	Olfr1367	279.93/461.48/308.24	20574/48594	308.24	34584	6.8053	12143	7681.1	391.09	1	0	0	0	TRUE
Gabrg3_6066	Gabrg3	32.123/20.24/52.112	3202.6/12252	32.123	7727.2	7.8661	270.37	387.86	390.73	1	0	0	0	TRUE
Scrib_48149	Scrib	28.19/44.529/13.305	5102.9/9071.1	28.19	7087	7.9238	244.26	326.78	390.48	1	0	0	0	TRUE
Fastkd1_70297	Fastkd1	244.53/109.3/109.77	8204.2/26512	109.77	17358	7.292	9080.7	1957	389.9	1	0	0	0	TRUE
Shox2_15742	Shox2	49.168/109.3/15.523	3957.7/16451	49.168	10204	7.6683	2373.8	678.6	389.83	1	0	0	0	TRUE
Cbln4_57854	Cbln4	96.37/127.51/99.789	12309/20247	99.789	16278	7.3355	390.2	1725.4	389.47	1	0	0	0	TRUE
Rem2_50823	Rem2	120.63/211.51/115.31	10302/26589	120.63	18445	7.2447	4144.2	2216.9	389.2	1	0	0	0	TRUE
Gna11_6567	Gna11	0/14.168/9.9789	0/7158.8	9.9789	3579.4	8.3493	58.564	84.191	389.02	1	0	0	0	TRUE
Agpat1_23950	Agpat1	55.724/12.144/12.196	2579.3/5573.3	12.196	4076.3	8.2713	947.34	109.32	388.71	1	0	0	0	TRUE
Elf3_4843	Elf3	5.2446/10.12/25.502	86.147/7130	10.12	3608.1	8.3423	130.18	85.745	388.55	1	0	0	0	TRUE
Olfr538_64458	Olfr538	62.28/21.252/9.9789	6694.1/5006.4	21.252	5850.2	8.0386	905.18	225.72	387.98	1	0	0	0	TRUE
Dnah5_49706	Dnah5	24.912/6.0721/18.849	1444.2/9368.9	18.849	5406.6	8.0898	100	192.93	387.89	1	0	0	0	TRUE
Shb_58261	Shb	1.3112/2.024/15.523	481.41/2066	2.024	1273.7	8.7195	91.361	10.767	387.55	1	0	0	0	TRUE
Zhx1_19297	Zhx1	2.6223/5.0601/2.2175	1728/1278	2.6223	1503	8.6977	3.0533	14.994	387.48	1	0	0	0	TRUE
Scyl1_44508	Scyl1	93.092/72.865/51.003	10343/15951	72.865	13147	7.4757	443.54	1139.4	387.33	1	0	0	0	TRUE
Rnf183_42394	Rnf183	59.658/4.0481/9.9789	3445.9/3680.3	9.9789	3563.1	8.3427	1251.6	84.191	387.24	1	0	0	0	TRUE
Bmp15_1624	Bmp15	172.42/152.81/58.764	14164/28770	152.81	21467	7.1248	4614.9	3031.2	387.13	1	0	0	0	TRUE
Zfhx4_44924	Zfhx4	12.456/20.24/8.8701	2782/5448.4	12.456	4115.2	8.2569	36.728	112.36	387.06	1	0	0	0	TRUE
Sumf1_26320	Sumf1	0.65558/7.0841/2.2175	1753.3/941.7	2.2175	1347.5	8.7112	13.062	12.099	386.77	1	0	0	0	TRUE
Olfr1330_64844	Olfr1330	1.9667/52.625/7.7613	0/6044.2	7.7613	3022.1	8.4307	1023.2	60.747	386.75	1	0	0	0	TRUE
B2m_1389	B2m	42.613/0/6.6526	5467.8/0	6.6526	2733.9	8.4813	668.69	49.746	386.67	1	0	0	0	TRUE
Kbtbd8_62784	Kbtbd8	67.525/61.733/55.438	3329.3/20189	61.733	11759	7.5505	36.584	915.7	386.56	1	0	0	0	TRUE
Cfap58_72247	Cfap58	24.912/15.18/8.8701	2989.8/6361.3	15.18	4675.5	8.1751	67.262	145.41	386.47	1	0	0	0	TRUE
Dtx3l_52706	Dtx3l	42.613/71.853/63.199	4697.5/19170	63.199	11934	7.5384	249.35	944.47	386.26	1	0	0	0	TRUE
Olfr398_66192	Olfr398	0/4.0481/2.2175	0/2690.6	2.2175	1345.3	8.7088	4.1342	12.099	386.13	1	0	0	0	TRUE
Ppp1r1c_41503	Ppp1r1c	35.401/20.24/35.48	6415.4/9849.4	35.401	8132.4	7.8037	114.93	440.63	385.73	1	0	0	0	TRUE
Olfr1262_67129	Olfr1262	70.147/29.349/16.631	1155.4/13213	29.349	7184	7.8872	913.12	344.51	385.47	1	0	0	0	TRUE
Nxt1_24926	Nxt1	272.07/246.93/218.43	18030/40772	246.93	29401	6.8898	722.13	5723.8	385.35	1	0	0	0	TRUE
Neurod6_1197	Neurod6	1.3112/11.132/12.196	1347.9/6246	11.132	3797	8.2902	48.793	97.064	384.27	1	0	0	0	TRUE
Olfr983_66621	Olfr983	72.114/36.433/87.592	10971/14933	72.114	12952	7.4689	756.36	1123.9	384.19	1	0	0	0	TRUE
Cyp1b1_3824	Cyp1b1	17.701/11.132/37.698	1277/8984.6	17.701	5130.8	8.1002	221.52	177.71	383.55	1	0	0	0	TRUE
Slc12a5_25506	Slc12a5	22.29/29.349/44.351	2437.4/11838	29.349	7138	7.8779	137.44	344.51	382.99	1	0	0	0	TRUE
Prss30_21768	Prss30	0/1.012/5.5438	101.35/1518.2	1.012	809.8	8.6546	10.781	4.4643	382.79	1	0	0	0	TRUE
Fkbp10_5675	Fkbp10	19.667/78.937/41.024	2320.9/15452	41.024	8886.2	7.7244	946.77	534.79	382.49	1	0	0	0	TRUE
Apol10a_63356	Apol10a	37.368/32.385/31.045	1844.6/13357	32.385	7600.7	7.831	13.314	392	382.25	1	0	0	0	TRUE
Rnf214_60444	Rnf214	24.912/0/0	278.71/951.31	0.65558	615.01	8.5395	310.3	2.5846	382.14	1	0	0	0	TRUE
Olfml3_46696	Olfml3	68.18/18.216/33.263	1778.7/13674	33.263	7726.3	7.8172	722.81	406.02	381.79	1	0	0	0	TRUE
Pfkl_12873	Pfkl	728.35/699.31/691.87	22013/94689	699.31	58351	6.3807	449.4	22809	381.73	1	0	0	0	TRUE
Abca16_59858	Abca16	12.456/21.252/29.937	2320.9/9176.8	21.252	5748.8	8.0134	76.396	225.72	381.23	1	0	0	0	TRUE
5430419D17Rik_36783	5430419D17Rik	26.879/19.228/32.154	3187.4/10195	26.879	6691.4	7.9072	43.179	307	380.36	1	0	0	0	TRUE
Cyp2a12_3839	Cyp2a12	0/2.024/3.3263	0/2498.4	2.024	1249.2	8.6915	2.8963	10.767	380.08	1	0	0	0	TRUE
Olfr1502_66509	Olfr1502	49.824/32.385/41.024	2488.1/15154	41.024	8820.9	7.7137	76.039	534.79	379.66	1	0	0	0	TRUE
Nags_55111	Nags	0.65558/3.0361/2.2175	481.41/2162.1	2.2175	1321.7	8.6834	1.5548	12.099	379.36	1	0	0	0	TRUE
Sfmbt2_71768	Sfmbt2	0/3.0361/0	0/1220.4	0.65558	610.18	8.5281	4.6088	2.5846	379.14	1	0	0	0	TRUE
Kcnj8_9091	Kcnj8	0/0/4.4351	0/1220.4	0.65558	610.18	8.5281	9.8348	2.5846	379.14	1	0	0	0	TRUE
Ralbp1_14756	Ralbp1	12.456/31.373/133.05	304.05/14462	31.373	7382.9	7.8335	5348.2	376.01	379.12	1	0	0	0	TRUE
Ifna15_62438	Ifna15	0.65558/6.0721/3.3263	587.83/2834.7	3.3263	1711.3	8.6286	7.3361	20.343	378.68	1	0	0	0	TRUE
Sertad3_51077	Sertad3	7.8669/5.0601/5.5438	0/4756.5	5.5438	2378.3	8.5062	2.8155	39.293	378.52	1	0	0	0	TRUE
B230219D22Rik_44232	B230219D22Rik	72.769/133.59/67.635	755.05/24878	72.769	12817	7.4409	1862.6	1137.4	377.87	1	0	0	0	TRUE
Cldn16_50238	Cldn16	9.1781/14.168/8.8701	25.337/6553.5	9.1781	3289.4	8.3366	12.498	75.518	377.47	1	0	0	0	TRUE
Slc25a48_70629	Slc25a48	19.667/15.18/46.568	2680.7/8139	19.667	5409.8	8.0324	371.89	203.95	377.43	1	0	0	0	TRUE
Fbxo33_35980	Fbxo33	37.368/37.445/53.221	288.85/16220	37.445	8254.6	7.7464	124.44	474.33	377.29	1	0	0	0	TRUE
Prl6a1_13710	Prl6a1	15.734/20.24/5.5438	70.944/9272.8	15.734	4671.9	8.1254	62.073	152.37	377.2	1	0	0	0	TRUE
Gjb5_6476	Gjb5	51.135/12.144/18.849	2503.3/8004.4	18.849	5253.9	8.0485	543.68	192.93	376.9	1	0	0	0	TRUE
Syne3_53379	Syne3	39.335/6.0721/1.1088	2214.5/2805.9	6.0721	2510.2	8.472	565.52	44.202	376.65	1	0	0	0	TRUE
Mrps22_27028	Mrps22	0/0/7.7613	0/1210.8	0.65558	605.38	8.5167	30.119	2.5846	376.15	1	0	0	0	TRUE
Use1_29762	Use1	0/3.0361/0	0/1210.8	0.65558	605.38	8.5167	4.6088	2.5846	376.15	1	0	0	0	TRUE
Zbtb3_41515	Zbtb3	99.648/14.168/15.523	1890.2/7331.8	15.523	4611	8.1248	3539.5	149.71	375.58	1	0	0	0	TRUE
Snai1_16225	Snai1	66.213/61.733/65.417	3035.4/20708	65.417	11872	7.4819	7.1026	988.38	375.53	1	0	0	0	TRUE
Ptpn5_14099	Ptpn5	1.3112/7.0841/1.1088	15.202/1854.6	1.3112	934.89	8.6616	16.684	6.1963	375.05	1	0	0	0	TRUE
Clasp2_42820	Clasp2	9.1781/7.0841/1.1088	1292.2/4228	7.0841	2760.1	8.4159	20.045	53.966	374.76	1	0	0	0	TRUE
Bcl2l12_42111	Bcl2l12	0/1.012/3.3263	0/1585.5	1.012	792.76	8.6239	3.19	4.4643	374.72	1	0	0	0	TRUE
Dctn4_31241	Dctn4	226.83/7.0841/4.4351	157.09/5361.9	7.0841	2759.5	8.4156	24148	53.966	374.67	1	0	0	0	TRUE
1700019A02Rik_34395	1700019A02Rik	29.501/5.0601/14.414	461.14/8283.1	14.414	4372.1	8.1483	157.56	135.91	373.79	1	0	0	0	TRUE
Myo16_63072	Myo16	22.945/52.625/65.417	298.98/20160	52.625	10230	7.5758	522.26	742.08	373.59	1	0	0	0	TRUE
4930562C15Rik_44456	4930562C15Rik	1.9667/0/1.1088	0/1672	1.1088	836	8.6327	0.98274	5.0105	372.98	1	0	0	0	TRUE
Tmem186_28960	Tmem186	77.358/110.31/99.789	11235/19920	99.789	15577	7.272	306.91	1725.4	372.6	1	0	0	0	TRUE
Fam46a_53604	Fam46a	66.869/39.469/123.07	7722.8/16172	66.869	11948	7.4599	1954.8	1017.4	372.47	1	0	0	0	TRUE
Cd300ld_55163	Cd300ld	133.08/35.421/33.263	2265.2/13424	35.421	7844.6	7.751	4771.2	440.94	371.89	1	0	0	0	TRUE
Atp1a4_20870	Atp1a4	1659.3/1507.9/1256.2	40996/1.4924e+05	1507.9	95118	5.9782	43127	63443	371.65	1	0	0	0	TRUE
Pbx2_12566	Pbx2	4.5891/0/2.2175	2204.3/384.37	2.2175	1294.4	8.6532	5.2708	12.099	371.48	1	0	0	0	TRUE
Klk4_25149	Klk4	431.37/187.22/231.73	11503/42838	231.73	27170	6.8673	20918	5261.5	371.38	1	0	0	0	TRUE
Abca7_21110	Abca7	12.456/21.252/21.066	2341.2/8792.4	21.066	5566.8	7.9791	37.088	223.14	371.26	1	0	0	0	TRUE
Olfr1085_65742	Olfr1085	32.123/16.192/13.305	3334.4/6034.6	16.192	4684.5	8.0903	131.07	158.19	371.16	1	0	0	0	TRUE
Pdss2_36747	Pdss2	13.767/3.0361/0	106.42/3055.7	3.0361	1581.1	8.6146	62.187	18.092	371	1	0	0	0	TRUE
Rnpc3_30277	Rnpc3	9.8337/0/1.1088	557.42/1105.1	1.1088	831.24	8.6245	38.677	5.0105	370.85	1	0	0	0	TRUE
Adam18_4517	Adam18	0/1.012/8.8701	0/1566.3	1.012	783.15	8.6063	31.387	4.4643	370.17	1	0	0	0	TRUE
Mad2l1_24174	Mad2l1	22.29/79.95/35.48	1611.5/14020	35.48	7815.6	7.7433	1075.7	441.92	370.1	1	0	0	0	TRUE
Tbc1d14_46996	Tbc1d14	0/6.0721/4.4351	0/4026.2	4.4351	2013.1	8.5336	11.175	29.459	370.09	1	0	0	0	TRUE
Psd3_60064	Psd3	110.14/73.877/62.091	6025.2/19295	73.877	12660	7.4017	726.85	1160.3	369.5	1	0	0	0	TRUE
Guca2b_7133	Guca2b	69.491/22.264/37.698	4925.6/11310	37.698	8117.8	7.7129	624.51	478.55	369.36	1	0	0	0	TRUE
Clta_3001	Clta	2.6223/10.12/1.1088	10.135/2853.9	2.6223	1432	8.6279	29.254	14.994	369.15	1	0	0	0	TRUE
BC017158_59961	BC017158	0/2.024/2.2175	5.0675/2421.5	2.024	1213.3	8.6494	2.0671	10.767	369.14	1	0	0	0	TRUE
Olfr868_65647	Olfr868	0/43.517/11.088	157.09/7110.8	11.088	3633.9	8.2323	587.29	96.558	368.69	1	0	0	0	TRUE
Hspa13_50059	Hspa13	31.468/7.0841/90.919	1373.3/13011	31.468	7192	7.7915	2064.5	377.51	368.54	1	0	0	0	TRUE
Gm3336_78347	Gm3336	15.078/19.228/29.937	628.37/9782.1	19.228	5205.2	8.0077	65.945	198.02	368.54	1	0	0	0	TRUE
Gpr149_57964	Gpr149	83.914/155.85/92.027	11437/17767	92.027	14602	7.2944	2069.6	1550.5	368.51	1	0	0	0	TRUE
Tmem184a_59039	Tmem184a	104.89/23.276/24.393	481.41/11685	24.393	6083.1	7.9045	3240.7	270.35	368.48	1	0	0	0	TRUE
Olfr685_64399	Olfr685	57.691/78.937/56.547	6030.3/15413	57.691	10722	7.5133	226.36	837.54	368.48	1	0	0	0	TRUE
Apol7a_42151	Apol7a	104.89/12.144/17.74	2741.5/7130	17.74	4935.7	8.0413	3813.4	178.23	368.38	1	0	0	0	TRUE
Slc3a2_10548	Slc3a2	17.045/11.132/7.7613	810.79/6467	11.132	3638.9	8.2289	23.162	97.064	368.22	1	0	0	0	TRUE
Zdhhc24_35975	Zdhhc24	6.5558/101.2/0	1915.5/3238.3	6.5558	2576.9	8.4144	4500.4	48.811	367.9	1	0	0	0	TRUE
Mlf2_21681	Mlf2	6.5558/2.024/5.5438	1601.3/3017.3	5.5438	2309.3	8.4637	6.7065	39.293	367.52	1	0	0	0	TRUE
Isg20l2_58001	Isg20l2	38.679/5.0601/5.5438	5.0675/4612.4	5.5438	2308.7	8.4634	549.09	39.293	367.43	1	0	0	0	TRUE
Ppargc1b_51228	Ppargc1b	16.389/50.601/90.919	1804/17796	50.601	9800.1	7.5694	1398	704.74	367.26	1	0	0	0	TRUE
Cox8b_3323	Cox8b	2.6223/4.0481/3.3263	329.38/2988.5	3.3263	1658.9	8.5838	0.50828	20.343	367.07	1	0	0	0	TRUE
Clip2_68415	Clip2	121.94/55.661/46.568	4165.5/16633	55.661	10399	7.5201	2237.6	798.95	365.95	1	0	0	0	TRUE
Zadh2_56704	Zadh2	27.534/54.649/25.502	1261.8/11819	27.534	6540.5	7.8408	369.67	316.86	365.89	1	0	0	0	TRUE
Dmbt1_3488	Dmbt1	7.8669/7.0841/14.414	425.67/5342.7	7.8669	2884.2	8.346	21.738	61.822	365.82	1	0	0	0	TRUE
Sap30_26636	Sap30	3.2779/7.0841/5.5438	1089.5/3507.3	5.5438	2298.4	8.4569	3.7535	39.293	365.78	1	0	0	0	TRUE
4930590J08Rik_72618	4930590J08Rik	158.65/54.649/103.11	9739.7/21496	103.11	15618	7.229	2716.5	1801.8	365.5	1	0	0	0	TRUE
Rbfox1_68053	Rbfox1	22.29/14.168/14.414	5194.1/3353.6	14.414	4273.9	8.1155	31.044	135.91	365.37	1	0	0	0	TRUE
Cyp11b1_49727	Cyp11b1	1.3112/0/5.5438	734.78/1085.8	1.3112	910.31	8.6232	9.8173	6.1963	365.17	1	0	0	0	TRUE
Gm4922_60883	Gm4922	125.87/229.73/199.58	9648.4/38735	199.58	24192	6.9143	3170.8	4316.5	365.17	1	0	0	0	TRUE
Tldc1_40601	Tldc1	6.5558/16.192/42.133	10.135/9205.6	16.192	4607.9	8.0665	382.89	158.19	365.07	1	0	0	0	TRUE
Akr1c19_73919	Akr1c19	181.6/206.45/215.1	22576/26858	206.45	24717	6.8966	346.32	4514.6	364.78	1	0	0	0	TRUE
Letm1_24652	Letm1	0/16.192/27.719	319.25/8888.5	16.192	4603.9	8.0653	197.53	158.19	364.75	1	0	0	0	TRUE
Acpt_78463	Acpt	45.891/57.685/53.221	5184/14942	53.221	10063	7.5362	36.831	753.15	364.74	1	0	0	0	TRUE
Tcam1_42283	Tcam1	50.48/46.553/41.024	3070.9/15336	46.553	9203.6	7.5967	22.992	631.51	364.39	1	0	0	0	TRUE
Rab36_43220	Rab36	9.1781/9.1082/6.6526	197.63/6121	9.1082	3159.3	8.2884	3.0174	74.771	364.31	1	0	0	0	TRUE
Mup8_77595	Mup8	0/0/1.1088	0/1172.3	0.65558	586.16	8.4703	0.61468	2.5846	364.2	1	0	0	0	TRUE
Vmn2r84_75740	Vmn2r84	1.9667/1.012/1.1088	998.29/634.21	1.1088	816.25	8.5982	0.37274	5.0105	364.16	1	0	0	0	TRUE
Enam_4925	Enam	17.045/17.204/15.523	4834.4/4670.1	17.045	4752.2	8.0412	1.1715	169.16	364.07	1	0	0	0	TRUE
Lhpp_42723	Lhpp	2.6223/7.0841/7.7613	35.472/5323.5	7.0841	2679.5	8.3732	10.183	53.966	363.78	1	0	0	0	TRUE
9230112D13Rik_44018	9230112D13Rik	7.2114/16.192/27.719	521.95/8657.9	16.192	4589.9	8.0609	106.76	158.19	363.64	1	0	0	0	TRUE
Prkcq_13105	Prkcq	7.2114/13.156/11.088	0/7168.4	11.088	3584.2	8.2124	9.6523	96.558	363.63	1	0	0	0	TRUE
Limch1_43639	Limch1	108.17/2.024/3.3263	805.73/2479.2	3.3263	1642.4	8.5694	5497	20.343	363.42	1	0	0	0	TRUE
Dalrd3_31547	Dalrd3	10.489/13.156/5.5438	121.62/6784.1	10.489	3452.8	8.2318	15.785	89.834	363.19	1	0	0	0	TRUE
Vpreb1_18767	Vpreb1	0.65558/7.0841/31.045	5.0675/5342.7	7.0841	2673.9	8.3702	307.73	53.966	363.02	1	0	0	0	TRUE
BC024978_73810	BC024978	238.63/37.445/63.199	7337.7/15096	63.199	11217	7.449	15720	944.47	362.93	1	0	0	0	TRUE
Slc44a5_62344	Slc44a5	180.28/76.913/27.719	6253.2/19286	76.913	12769	7.3567	6552.8	1223.6	362.85	1	0	0	0	TRUE
Zfp612_60222	Zfp612	112.1/73.877/147.47	12045/20717	112.1	16381	7.1783	1355.9	2012.2	362.68	1	0	0	0	TRUE
Aco2_98	Aco2	0/2.024/5.5438	0/2383.1	2.024	1191.5	8.6233	8.2428	10.767	362.51	1	0	0	0	TRUE
Gadd45b_11174	Gadd45b	270.1/213.54/176.29	17240/32959	213.54	25099	6.8704	2293.2	4721	362.19	1	0	0	0	TRUE
Myadm_22202	Myadm	27.534/31.373/27.719	1915.5/11089	27.719	6502.2	7.823	6.6912	319.65	362.14	1	0	0	0	TRUE
Oard1_48408	Oard1	8.5225/43.517/7.7613	0/6015.3	8.5225	3007.7	8.3036	612.59	68.589	362.14	1	0	0	0	TRUE
Col4a4_3205	Col4a4	24.256/9.1082/28.828	2832.7/9080.7	24.256	5956.7	7.882	125.18	268.37	362.13	1	0	0	0	TRUE
Rnf7_14799	Rnf7	116.04/250.98/277.19	6983/48901	250.98	27942	6.793	9448.3	5848.6	362.09	1	0	0	0	TRUE
Plin1_47654	Plin1	364.5/168/181.84	13900/31182	181.84	22541	6.9459	16779	3815.8	361.96	1	0	0	0	TRUE
Olfr320_54835	Olfr320	22.29/2.024/7.7613	4581/1076.2	7.7613	2828.6	8.3352	121.99	60.747	361.92	1	0	0	0	TRUE
Fam134c_32083	Fam134c	36.712/40.481/35.48	2589.5/13040	36.712	7814.6	7.6952	7.8591	462.18	361.79	1	0	0	0	TRUE
Gm6812_75992	Gm6812	23.601/22.264/8.8701	3724.6/7524	22.264	5624.3	7.9177	90.597	239.88	361.7	1	0	0	0	TRUE
Tceal6_27457	Tceal6	20.979/24.288/15.523	4266.8/6543.8	20.979	5405.3	7.9424	20.361	221.92	361.44	1	0	0	0	TRUE
Cxcl2_15437	Cxcl2	44.579/43.517/58.764	1925.6/15817	44.579	8871.2	7.6048	101.17	596.54	361.39	1	0	0	0	TRUE
Adam1a_69116	Adam1a	93.748/62.745/121.96	6942.4/22043	93.748	14493	7.2571	878.66	1588.9	361.24	1	0	0	0	TRUE
Lrrc42_43848	Lrrc42	0/0/11.088	0/1162.7	0.65558	581.35	8.4584	61.468	2.5846	361.21	1	0	0	0	TRUE
Ntn1_11979	Ntn1	3.2779/8.0962/1.1088	15.202/3219.1	3.2779	1617.1	8.5632	13.96	19.963	361.2	1	0	0	0	TRUE
Mrps31_25654	Mrps31	0/1.012/3.3263	0/1527.9	1.012	763.93	8.5705	3.19	4.4643	361.08	1	0	0	0	TRUE
Olfr610_67508	Olfr610	3.9335/8.0962/3.3263	0/3632.3	3.9335	1816.1	8.5248	8.8483	25.238	360.72	1	0	0	0	TRUE
Cyp2a12_3840	Cyp2a12	104.24/51.613/64.308	5979.6/16576	64.308	11278	7.4321	877.74	966.36	360.72	1	0	0	0	TRUE
Ulbp1_43813	Ulbp1	19.012/5.0601/4.4351	349.65/3920.5	5.0601	2135.1	8.4614	97.52	34.922	360.44	1	0	0	0	TRUE
Mss51_41236	Mss51	35.401/20.24/21.066	2087.8/8705.9	21.066	5396.9	7.9344	103.08	223.14	359.88	1	0	0	0	TRUE
Rdh7_23304	Rdh7	15.078/12.144/7.7613	1606.4/5919.2	12.144	3762.8	8.1616	13.909	108.71	359.73	1	0	0	0	TRUE
Acaca_48591	Acaca	5.2446/3.0361/4.4351	0/3910.9	4.4351	1955.5	8.4917	1.3063	29.459	359.46	1	0	0	0	TRUE
Ski_15888	Ski	1.9667/11.132/8.8701	1657.1/4468.3	8.8701	3062.7	8.278	26.387	72.243	359.29	1	0	0	0	TRUE
Vamp3_18647	Vamp3	9.8337/29.349/29.937	694.24/12694	29.349	6694	7.7853	190.59	344.51	359.07	1	0	0	0	TRUE
Tssk3_26290	Tssk3	7.8669/4.0481/4.4351	187.5/3718.7	4.4351	1953.1	8.49	5.9638	29.459	359.03	1	0	0	0	TRUE
Shisa3_71038	Shisa3	314.68/494.88/217.32	15547/48882	314.68	32214	6.6732	20975	7894.8	359.02	1	0	0	0	TRUE
Rac2_14344	Rac2	222.9/44.529/72.07	3319.2/20881	72.07	12100	7.3716	11754	1123	358.92	1	0	0	0	TRUE
Fmo9_61985	Fmo9	73.425/38.457/19.958	3810.7/12175	38.457	7992.8	7.6625	782.49	491.24	358.88	1	0	0	0	TRUE
Olfr384_51938	Olfr384	456.28/296.52/340.39	13495/54349	340.39	33922	6.6347	7677.8	8762.2	358.75	1	0	0	0	TRUE
Dsp_49524	Dsp	0/24.288/3.3263	263.51/2978.8	3.3263	1621.2	8.5506	225.24	20.343	358.7	1	0	0	0	TRUE
Gm9994_77583	Gm9994	0.65558/22.264/28.828	233.1/10916	22.264	5574.6	7.9048	255.01	239.88	358.49	1	0	0	0	TRUE
Mtmr12_68036	Mtmr12	32.123/25.3/9.9789	3780.3/8340.8	25.3	6060.5	7.8485	140.65	283.6	358.38	1	0	0	0	TRUE
Igsf3_44533	Igsf3	0/17.204/12.196	739.85/6764.9	12.196	3752.4	8.1519	86.916	109.32	357.72	1	0	0	0	TRUE
Acbd4_30051	Acbd4	5.9002/32.385/42.133	1793.9/12425	32.385	7109.3	7.7346	398.23	392	357.43	1	0	0	0	TRUE
Zfp235_25016	Zfp235	2.6223/21.252/12.196	2903.7/4593.2	12.196	3748.4	8.1504	86.837	109.32	357.35	1	0	0	0	TRUE
Crygc_3548	Crygc	66.869/97.154/79.831	2665.5/23110	79.831	12888	7.317	234.05	1285.2	357.27	1	0	0	0	TRUE
Smad9_24006	Smad9	66.869/35.421/77.613	5143.5/17777	66.869	11460	7.3998	552.22	1017.4	357.2	1	0	0	0	TRUE
Ddx52_44168	Ddx52	0.65558/10.12/1.1088	5.0675/1595.1	1.1088	800.09	8.5694	40.706	5.0105	356.94	1	0	0	0	TRUE
Atp8a1_1310	Atp8a1	201.92/185.2/131.94	14047/30951	185.2	22499	6.9169	1557.9	3909.5	356.87	1	0	0	0	TRUE
Ptpn4_14096	Ptpn4	0/16.192/14.414	623.3/7725.8	14.414	4174.5	8.0816	105.46	135.91	356.85	1	0	0	0	TRUE
Ldhc_9746	Ldhc	0/8.0962/0	5.0675/1143.5	0.65558	574.28	8.4408	32.774	2.5846	356.81	1	0	0	0	TRUE
Pabpc5_45757	Pabpc5	31.468/49.589/39.915	3932.3/12348	39.915	8140.1	7.6364	82.47	515.87	356.63	1	0	0	0	TRUE
9830147E19Rik_52362	9830147E19Rik	77.358/85.01/100.9	3800.6/23004	85.01	13402	7.2839	155.48	1396.3	356.39	1	0	0	0	TRUE
Rep15_28602	Rep15	107.51/29.349/52.112	4231.3/15163	52.112	9697.3	7.5126	1793.8	732.57	356.36	1	0	0	0	TRUE
Nxnl2_41401	Nxnl2	0.65558/12.144/16.631	1581/5871.2	12.144	3726.1	8.1475	76.062	108.71	356.21	1	0	0	0	TRUE
Tmem39b_58518	Tmem39b	57.691/48.577/19.958	9912/8590.6	48.577	9251.3	7.544	451.06	667.88	356.09	1	0	0	0	TRUE
Cenpk_26645	Cenpk	165.86/29.349/39.915	5827.6/10426	39.915	8126.8	7.6341	7987	515.87	356.05	1	0	0	0	TRUE
Arrdc2_36189	Arrdc2	0/12.144/1.1088	10.135/1585.5	1.1088	797.82	8.5653	61.505	5.0105	355.93	1	0	0	0	TRUE
C1qtnf4_30764	C1qtnf4	148.82/25.3/59.873	10170/11041	59.873	10606	7.4449	4553.1	879.53	355.59	1	0	0	0	TRUE
Ythdf3_57909	Ythdf3	548.06/381.53/423.55	23493/54321	423.55	38907	6.518	8634.9	11713	355.59	1	0	0	0	TRUE
Slc1a4_23939	Slc1a4	41.301/21.252/43.242	3445.9/13155	41.301	8300.4	7.6165	202.86	539.55	355.57	1	0	0	0	TRUE
D17Wsu92e_56310	D17Wsu92e	9.8337/18.216/18.849	1920.6/7764.2	18.216	4842.4	7.9775	35.335	184.51	355.15	1	0	0	0	TRUE
Gm12888_74997	Gm12888	183.56/40.481/39.915	2341.2/14020	40.481	8180.5	7.6238	10236	525.5	355.09	1	0	0	0	TRUE
Arhgap17_35848	Arhgap17	276/52.625/34.372	4175.6/15221	52.625	9698.3	7.4988	25115	742.08	354.08	1	0	0	0	TRUE
Olfr146_66321	Olfr146	40.646/17.204/31.045	2903.7/10791	31.045	6847.4	7.7395	141.87	370.87	353.95	1	0	0	0	TRUE
Vmn2r82_75711	Vmn2r82	68.18/64.769/73.178	10338/12646	68.18	11492	7.3761	18.308	1043.8	353.58	1	0	0	0	TRUE
Zc3h14_41818	Zc3h14	113.42/14.168/12.196	2173.9/6005.7	14.168	4089.8	8.0752	4926.9	132.9	353.54	1	0	0	0	TRUE
Tex28_73212	Tex28	25.568/40.481/34.372	2751.6/11867	34.372	7309.5	7.6912	57.416	423.88	353.36	1	0	0	0	TRUE
Psg18_20308	Psg18	48.513/65.781/117.53	1104.7/21323	65.781	11214	7.3917	1488	995.64	353.3	1	0	0	0	TRUE
H2-Eb2_72170	H2-Eb2	1.9667/9.1082/12.196	907.08/5217.8	9.1082	3062.4	8.2435	30.269	74.771	353.11	1	0	0	0	TRUE
Olfr707_52026	Olfr707	11.8/22.264/15.523	1145.2/7524	15.523	4334.6	8.0356	29.653	149.71	352.99	1	0	0	0	TRUE
Cyp2j13_58343	Cyp2j13	13.112/23.276/15.523	157.09/8504.1	15.523	4330.6	8.0343	32.967	149.71	352.67	1	0	0	0	TRUE
Gpc5_47659	Gpc5	74.736/32.385/35.48	6324.2/8571.4	35.48	7447.8	7.6737	775.29	441.92	352.6	1	0	0	0	TRUE
R3hcc1l_22363	R3hcc1l	6.5558/11.132/7.7613	744.92/4756.5	7.7613	2750.7	8.295	6.4081	60.747	351.93	1	0	0	0	TRUE
Nxnl2_41402	Nxnl2	43.924/17.204/29.937	0/13289	29.937	6644.7	7.747	178.88	353.59	351.78	1	0	0	0	TRUE
Cenpv_39170	Cenpv	73.425/29.349/48.786	978.02/17335	48.786	9156.5	7.5231	492.45	671.66	351.43	1	0	0	0	TRUE
Pik3c2a_12970	Pik3c2a	0/54.649/11.088	0/6928.2	11.088	3464.1	8.1632	1010.3	96.558	351.4	1	0	0	0	TRUE
Fbxw26_72841	Fbxw26	17.045/20.24/70.961	932.41/9320.9	20.24	5126.7	7.9153	1291.4	211.76	350.91	1	0	0	0	TRUE
Mpc2_35804	Mpc2	9.1781/20.24/29.937	374.99/9878.2	20.24	5126.6	7.9153	108.2	211.76	350.91	1	0	0	0	TRUE
Dicer1_51699	Dicer1	7.2114/9.1082/7.7613	2842.8/2632.9	7.7613	2737.9	8.2882	1.0582	60.747	350.28	1	0	0	0	TRUE
control_78840	control	429.4/284.38/232.84	18912/39859	284.38	29385	6.6861	11844	6902.5	350.27	1	0	0	0	TRUE
Ccnd2_2272	Ccnd2	46.546/18.216/14.414	734.78/8811.6	18.216	4773.2	7.9568	408.52	184.51	350.06	1	0	0	0	TRUE
Tor1a_21720	Tor1a	49.824/38.457/9.9789	4778.6/10801	38.457	7789.7	7.6253	470.1	491.24	349.72	1	0	0	0	TRUE
Mff_42103	Mff	11.145/2.024/2.2175	1043.9/1393.3	2.2175	1218.6	8.5663	39.867	12.099	349.71	1	0	0	0	TRUE
Nox3_56252	Nox3	64.247/108.29/15.523	7596.1/14250	64.247	10923	7.3874	2156.7	965.14	349.54	1	0	0	0	TRUE
Zscan21_19177	Zscan21	4.5891/8.0962/67.635	1712.8/3901.3	8.0962	2807.1	8.2701	1778.6	64.169	349.41	1	0	0	0	TRUE
Ifi35_35395	Ifi35	5.2446/21.252/14.414	258.44/7908.3	14.414	4083.4	8.0497	65.42	135.91	349.03	1	0	0	0	TRUE
Tcp10c_77518	Tcp10c	4.5891/3.0361/12.196	0/3882.1	4.5891	1941.1	8.4408	30.142	30.785	349.01	1	0	0	0	TRUE
Apoc2_940	Apoc2	0/13.156/7.7613	25.337/5429.2	7.7613	2727.3	8.2826	44.672	60.747	348.92	1	0	0	0	TRUE
Setd1b_52335	Setd1b	104.89/141.68/82.048	3790.5/26358	104.89	15074	7.1534	937.68	1843	348.69	1	0	0	0	TRUE
Sh2d3c_21060	Sh2d3c	0.65558/2.024/47.677	5.0675/2287	2.024	1146	8.5672	1043	10.767	348.64	1	0	0	0	TRUE
Ubac2_33581	Ubac2	4.5891/0/1.1088	187.5/1374.1	1.1088	780.8	8.5343	6.6709	5.0105	348.32	1	0	0	0	TRUE
Fst_5873	Fst	13.112/38.457/18.849	1363.1/8350.4	18.849	4856.8	7.9351	208.69	192.93	348.31	1	0	0	0	TRUE
Fes_5500	Fes	69.491/17.204/18.849	744.92/8965.4	18.849	4855.1	7.9346	1283.7	192.93	348.19	1	0	0	0	TRUE
Sat2_34109	Sat2	0.65558/12.144/17.74	2072.6/5208.2	12.144	3640.4	8.1139	81.652	108.71	347.99	1	0	0	0	TRUE
Prox2_39449	Prox2	0.65558/4.0481/12.196	0/3565	4.0481	1782.5	8.4648	38.952	26.189	347.52	1	0	0	0	TRUE
9830147E19Rik_52364	9830147E19Rik	15.734/13.156/46.568	2092.9/6505.4	15.734	4299.1	8.0055	478.69	152.37	347	1	0	0	0	TRUE
Fem1b_5488	Fem1b	31.468/5.0601/9.9789	2052.3/4333.7	9.9789	3193	8.1845	242.98	84.191	346.9	1	0	0	0	TRUE
Tnr_17918	Tnr	78.014/106.26/191.82	7986.3/22264	106.26	15125	7.1398	4058.7	1874.8	346.87	1	0	0	0	TRUE
Sod2_16316	Sod2	55.069/101.2/43.242	4601.3/14971	55.069	9786.2	7.4476	1134.1	787.77	346.71	1	0	0	0	TRUE
Clec11a_15288	Clec11a	51.135/130.55/113.09	6506.6/24984	113.09	15745	7.1086	2071.8	2035.7	346.46	1	0	0	0	TRUE
Il22ra1_58583	Il22ra1	14.423/42.505/60.982	1692.5/14789	42.505	8240.5	7.5656	565	560.31	346.34	1	0	0	0	TRUE
Slc4a8_26458	Slc4a8	144.23/20.24/26.61	2417.2/9657.2	26.61	6037.2	7.7728	6937.2	302.99	345.3	1	0	0	0	TRUE
Tmem229b_67958	Tmem229b	17.701/22.264/8.8701	1798.9/7437.5	17.701	4618.2	7.9484	49.403	177.71	345.1	1	0	0	0	TRUE
Crisp2_18006	Crisp2	191.43/234.79/269.43	10439/40397	234.79	25418	6.7523	1540	5353.7	344.18	1	0	0	0	TRUE
Zfp773_42642	Zfp773	0/1.012/1.1088	5.0675/1451	1.012	728.03	8.5012	0.51677	4.4643	344.08	1	0	0	0	TRUE
Coa4_32455	Coa4	67.525/46.553/47.677	6101.2/11560	47.677	8830.5	7.5033	197.6	651.65	344.06	1	0	0	0	TRUE
Ddhd2_38005	Ddhd2	33.435/89.058/58.764	7104.6/13155	58.764	10130	7.4052	779.64	858.13	343.79	1	0	0	0	TRUE
Cyp2d12_72116	Cyp2d12	60.969/69.829/67.635	501.68/21726	67.635	11114	7.3394	24.624	1032.8	343.73	1	0	0	0	TRUE
control_78746	control	55.724/99.178/82.048	3248.2/21976	82.048	12612	7.2468	493.19	1332.5	343.26	1	0	0	0	TRUE
Mea1_10551	Mea1	236.66/280.33/177.4	7753.2/43184	236.66	25468	6.7437	2709.3	5410.4	343.03	1	0	0	0	TRUE
Hn1l_22359	Hn1l	57.691/11.132/2.2175	4484.7/2296.6	11.132	3390.6	8.127	1123.6	97.064	343.03	1	0	0	0	TRUE
Slc35a5_40080	Slc35a5	18.356/17.204/44.351	1510.1/7889.1	18.356	4699.6	7.9239	338.52	186.36	342.91	1	0	0	0	TRUE
Vmn2r56_76080	Vmn2r56	32.123/5.0601/9.9789	1890.2/4420.2	9.9789	3155.2	8.1673	257.29	84.191	342.78	1	0	0	0	TRUE
5530400C23Rik_59315	5530400C23Rik	28.19/63.757/102.01	2548.9/18767	63.757	10658	7.3628	1364	955.46	342.73	1	0	0	0	TRUE
Pot1b_38934	Pot1b	109.48/104.24/162.99	9384.9/21102	109.48	15243	7.1083	1445.2	1950.3	342.69	1	0	0	0	TRUE
Htr2a_8127	Htr2a	1.3112/73.877/5.5438	10.135/4295.3	5.5438	2152.7	8.3625	2343.7	39.293	342.54	1	0	0	0	TRUE
Fgf22_29992	Fgf22	26.879/16.192/55.438	45.607/12011	26.879	6028.5	7.7567	464.92	307	342.53	1	0	0	0	TRUE
Omd_20732	Omd	11.145/148.77/21.066	820.93/9436.2	21.066	5128.6	7.8608	8202.9	223.14	341.92	1	0	0	0	TRUE
Vapa_21827	Vapa	0/4.0481/8.8701	0/3507.3	4.0481	1753.7	8.4413	19.819	26.189	341.89	1	0	0	0	TRUE
Xylb_47363	Xylb	4.5891/17.204/25.502	1783.7/7187.7	17.204	4485.7	7.9452	113.99	171.23	341.49	1	0	0	0	TRUE
Capn2_2009	Capn2	11.145/41.493/22.175	1849.6/8744.3	22.175	5297	7.8367	247.42	238.63	341.46	1	0	0	0	TRUE
Grin3b_50930	Grin3b	26.223/21.252/25.502	2077.7/9532.3	25.502	5805	7.7753	9.288	286.56	341.42	1	0	0	0	TRUE
Crk_3445	Crk	1.3112/1.012/5.5438	0/1700.8	1.3112	850.41	8.5251	9.0024	6.1963	341.11	1	0	0	0	TRUE
Zfp213_74655	Zfp213	0/4.0481/7.7613	0/3497.7	4.0481	1748.9	8.4373	15.088	26.189	340.95	1	0	0	0	TRUE
Arhgap15_42419	Arhgap15	0/0/3.3263	491.54/605.38	0.65558	548.46	8.3745	5.5321	2.5846	340.75	1	0	0	0	TRUE
Olfr629_66599	Olfr629	49.168/51.613/44.351	4160.4/13683	49.168	8921.9	7.4746	14.594	678.6	340.6	1	0	0	0	TRUE
Sprr2d_16610	Sprr2d	232.73/76.913/97.571	1383.4/26685	97.571	14034	7.1537	9347.4	1675	340.52	1	0	0	0	TRUE
Klra3_9386	Klra3	135.7/169.01/215.1	10981/29414	169.01	20197	6.8925	1616.8	3463.4	340.32	1	0	0	0	TRUE
Prss30_21769	Prss30	10.489/69.829/23.284	2832.7/8062.1	23.284	5447.4	7.8097	1165.1	254.37	340.09	1	0	0	0	TRUE
Pcdhb9_45901	Pcdhb9	43.268/92.094/89.81	4307.3/22197	89.81	13252	7.1893	1085.7	1501.3	339.7	1	0	0	0	TRUE
Olfr251_73588	Olfr251	102.27/58.697/39.915	6962.7/13030	58.697	9996.4	7.3877	1125.7	856.84	339.5	1	0	0	0	TRUE
Pcdhgc3_45689	Pcdhgc3	53.102/31.373/31.045	2341.2/10887	31.373	6614.2	7.6749	236.13	376.01	339.48	1	0	0	0	TRUE
A630076J17Rik_69741	A630076J17Rik	39.335/30.361/19.958	2827.6/10118	30.361	6473	7.6896	94.377	360.18	339.48	1	0	0	0	TRUE
Stom_4982	Stom	4.5891/12.144/24.393	1510.1/5592.5	12.144	3551.3	8.0782	103.55	108.71	339.45	1	0	0	0	TRUE
Eml6_61000	Eml6	3.2779/29.349/88.701	1702.7/10945	29.349	6323.8	7.7032	2101.2	344.51	339.12	1	0	0	0	TRUE
Parp11_47062	Parp11	29.501/101.2/34.372	2903.7/11127	34.372	7015.5	7.632	2245	423.88	339.08	1	0	0	0	TRUE
Etnppl_37202	Etnppl	3.2779/11.132/8.8701	1282.1/4497.1	8.8701	2889.6	8.1941	18.195	72.243	338.92	1	0	0	0	TRUE
Cyp4x1_45151	Cyp4x1	9.1781/32.385/24.393	1398.6/9791.7	24.393	5595.2	7.7839	147.68	270.35	338.81	1	0	0	0	TRUE
Slc4a2_16063	Slc4a2	98.992/142.69/73.178	4727.9/23466	98.992	14097	7.1394	1288.1	1707.3	338.77	1	0	0	0	TRUE
Ina_56904	Ina	37.368/28.337/89.81	3491.5/11310	37.368	7400.7	7.5918	1415.9	473.05	338.55	1	0	0	0	TRUE
Ormdl1_57220	Ormdl1	48.513/71.853/118.64	942.55/21842	71.853	11392	7.2889	1366.8	1118.6	338.48	1	0	0	0	TRUE
C2cd4a_63280	C2cd4a	51.791/27.325/34.372	1677.3/12329	34.372	7002.9	7.6294	176.54	423.88	338.47	1	0	0	0	TRUE
Gzf1_40921	Gzf1	6539.4/5330.3/5369.7	77552/3.3087e+05	5369.7	204210	5.2488	684830	345280	338.4	1	0	0	0	TRUE
Lhx1_9817	Lhx1	18.356/13.156/33.263	3288.8/5986.5	18.356	4637.6	7.9048	124.62	186.36	338.37	1	0	0	0	TRUE
Cbr3_49624	Cbr3	13.767/8.0962/5.5438	1900.3/3536.2	8.0962	2718.2	8.2237	19.337	64.169	338.32	1	0	0	0	TRUE
Agap3_53918	Agap3	38.024/116.38/39.915	1175.7/14250	39.915	7713	7.5587	2925.4	515.87	337.83	1	0	0	0	TRUE
C330007P06Rik_43740	C330007P06Rik	1.3112/10.12/5.5438	76.012/4170.4	5.5438	2123.2	8.3426	19.429	39.293	337.83	1	0	0	0	TRUE
Adora2b_365	Adora2b	32.123/178.12/41.024	719.58/14981	41.024	7850.1	7.5455	9436.6	534.79	337.68	1	0	0	0	TRUE
Olfr957_66313	Olfr957	33.435/13.156/8.8701	679.04/6764.9	13.156	3721.9	8.0389	214.79	120.66	337.64	1	0	0	0	TRUE
Dnajc27_55251	Dnajc27	130.46/70.841/99.789	7160.3/21083	99.789	14121	7.1305	889.35	1725.4	337.56	1	0	0	0	TRUE
Zbtb26_70210	Zbtb26	109.48/38.457/157.44	13758/16268	109.48	15013	7.0864	3672.5	1950.3	337.48	1	0	0	0	TRUE
Nkpd1_34594	Nkpd1	20.323/7.0841/49.894	364.86/9522.7	20.323	4943.8	7.8574	524.87	212.89	337.44	1	0	0	0	TRUE
Ucp1_18429	Ucp1	132.43/21.252/15.523	3729.7/6447.8	21.252	5088.7	7.8375	6196.3	225.72	337.29	1	0	0	0	TRUE
Fbxo22_37792	Fbxo22	53.757/50.601/67.635	2827.6/15913	53.757	9370.2	7.419	101.27	763.17	337.24	1	0	0	0	TRUE
Hyou1_1845	Hyou1	0/16.192/5.5438	0/4237.6	5.5438	2118.8	8.3396	72.062	39.293	337.13	1	0	0	0	TRUE
Slc25a40_69586	Slc25a40	7.8669/19.228/9.9789	25.337/6178.7	9.9789	3102	8.1428	45.007	84.191	336.99	1	0	0	0	TRUE
5430427O19Rik_36789	5430427O19Rik	69.491/35.421/77.613	1945.9/20237	69.491	11091	7.2979	613.39	1070.3	336.9	1	0	0	0	TRUE
Ercc6l2_42535	Ercc6l2	3.2779/5.0601/3.3263	410.46/2632.9	3.3263	1521.7	8.4593	1.5042	20.343	336.64	1	0	0	0	TRUE
Kcnmb4_26248	Kcnmb4	17.701/48.577/23.284	1261.8/9522.7	23.284	5392.2	7.795	335.45	254.37	336.64	1	0	0	0	TRUE
Zbtb12_51961	Zbtb12	153.41/130.55/95.354	6283.7/27367	130.55	16825	6.999	880.58	2461.2	336.52	1	0	0	0	TRUE
Ctxn3_76089	Ctxn3	357.29/73.877/67.635	6952.6/16115	73.877	11534	7.2672	40181	1160.3	336.43	1	0	0	0	TRUE
Hoxb3_7811	Hoxb3	21.634/17.204/6.6526	3390.1/5438.8	17.204	4414.5	7.9221	65.481	171.23	336.04	1	0	0	0	TRUE
Csmd3_61489	Csmd3	152.09/50.601/60.982	7935.6/12357	60.982	10147	7.3551	4204.6	901.05	335.99	1	0	0	0	TRUE
Tdg_17339	Tdg	95.059/65.781/63.199	4216.1/17104	65.781	10660	7.3187	431.92	995.64	335.76	1	0	0	0	TRUE
Grxcr1_74181	Grxcr1	92.437/11.132/22.175	81.079/10330	22.175	5205.5	7.8116	2529.3	238.63	335.54	1	0	0	0	TRUE
Gm7534_76509	Gm7534	24.912/14.168/8.8701	1489.8/6274.8	14.168	3882.3	8.0001	71.749	132.9	335.54	1	0	0	0	TRUE
Nrtn_11923	Nrtn	127.84/160.91/170.75	7778.6/30740	160.91	19259	6.8943	595.31	3245.5	335.24	1	0	0	0	TRUE
Btn2a2_61272	Btn2a2	5.9002/13.156/29.937	3516.8/3872.5	13.156	3694.7	8.0282	167.12	120.66	335.16	1	0	0	0	TRUE
Olfr248_66202	Olfr248	19.667/41.493/2.2175	2437.4/7168.4	19.667	4802.9	7.8607	390.42	203.95	334.94	1	0	0	0	TRUE
Dyrk1a_4561	Dyrk1a	0.65558/1.012/3.3263	339.52/1076.2	1.012	707.87	8.4607	2.7414	4.4643	334.55	1	0	0	0	TRUE
Olfr559_67618	Olfr559	13.112/2.024/1.1088	45.607/2152.5	2.024	1099	8.5069	61.886	10.767	334.32	1	0	0	0	TRUE
Lgalsl_54752	Lgalsl	75.392/15.18/49.894	8528.5/9157.5	49.894	8843	7.4411	927.59	691.82	334.31	1	0	0	0	TRUE
Clec4b1_35031	Clec4b1	98.337/75.901/90.919	2797.2/23485	90.919	13141	7.1596	140.27	1525.9	334.09	1	0	0	0	TRUE
Trim29_38127	Trim29	2.6223/5.0601/6.6526	430.73/3526.6	5.0601	1978.6	8.3517	4.2394	34.922	333.97	1	0	0	0	TRUE
Esrp1_52312	Esrp1	370.4/177.1/235.06	12623/36717	235.06	24670	6.7075	10838	5361.8	333.7	1	0	0	0	TRUE
Olfr730_65409	Olfr730	61.624/102.21/36.589	4266.8/15999	61.624	10133	7.3383	1137.1	913.57	333.21	1	0	0	0	TRUE
Ccdc60_68394	Ccdc60	101.61/3.0361/2.2175	927.35/1912.2	3.0361	1419.8	8.4595	4859.2	18.092	333.08	1	0	0	0	TRUE
Kntc1_52511	Kntc1	0/8.0962/27.719	55.742/5294.7	8.0962	2675.2	8.2007	225.3	64.169	332.95	1	0	0	0	TRUE
Syk_16971	Syk	1.3112/13.156/5.5438	1109.8/3074.9	5.5438	2092.4	8.3215	37.932	39.293	332.91	1	0	0	0	TRUE
Ttll10_71027	Ttll10	141.61/119.42/197.36	5711/29414	141.61	17562	6.9444	1800.4	2740.5	332.78	1	0	0	0	TRUE
Bcorl1_70035	Bcorl1	571.66/533.33/300.47	24116/60884	533.33	42500	6.3136	27846	15909	332.72	1	0	0	0	TRUE
Serpinc1_1158	Serpinc1	13.767/50.601/13.305	704.38/6851.3	13.767	3777.9	7.9994	678.47	128.01	332.69	1	0	0	0	TRUE
Ccdc117_47849	Ccdc117	25.568/25.3/29.937	60.81/11272	25.568	5666.2	7.7368	9.5799	287.53	332.65	1	0	0	0	TRUE
Slc6a17_58127	Slc6a17	18.356/5.0601/7.7613	1758.4/3440.1	7.7613	2599.2	8.2133	59.774	60.747	332.49	1	0	0	0	TRUE
Ets2_19525	Ets2	0.65558/3.0361/5.5438	354.72/2479.2	3.0361	1416.9	8.4566	5.9778	18.092	332.41	1	0	0	0	TRUE
Slc9a6_60784	Slc9a6	32.779/39.469/89.81	197.63/14865	39.469	7531.5	7.5402	1289.5	508.3	332.31	1	0	0	0	TRUE
Olfr165_65318	Olfr165	67.525/21.252/34.372	4200.9/9541.9	34.372	6871.4	7.6021	635.62	423.88	332.08	1	0	0	0	TRUE
Ciz1_32797	Ciz1	38.024/10.12/11.088	30.405/6515	11.088	3272.7	8.0813	363.24	96.558	331.92	1	0	0	0	TRUE
Chd1l_32239	Chd1l	0/0/8.8701	126.69/941.7	0.65558	534.19	8.3366	39.339	2.5846	331.87	1	0	0	0	TRUE
Atp2a3_22829	Atp2a3	71.458/51.613/39.915	6886.7/11051	51.613	8968.6	7.4135	265.33	723.35	331.55	1	0	0	0	TRUE
Arsg_39930	Arsg	0/10.12/0	0/1066.6	0.65558	533.31	8.3342	51.209	2.5846	331.32	1	0	0	0	TRUE
Gm4461_77970	Gm4461	24.912/5.0601/13.305	5.0675/7351	13.305	3678	8.0067	101.35	122.44	331.19	1	0	0	0	TRUE
Adam22_259	Adam22	1.9667/1.012/9.9789	126.69/2008.3	1.9667	1067.5	8.4925	32.553	10.379	330.74	1	0	0	0	TRUE
Zfp120_47790	Zfp120	105.55/54.649/41.024	4682.3/13895	54.649	9288.6	7.3831	1388.2	779.88	330.65	1	0	0	0	TRUE
Rfx3_14687	Rfx3	39.99/14.168/13.305	1069.2/6582.3	14.168	3825.8	7.9789	333.76	132.9	330.63	1	0	0	0	TRUE
Vsig2_25624	Vsig2	21.634/25.3/19.958	1702.7/8379.2	21.634	5040.9	7.7993	8.1263	231.04	330.22	1	0	0	0	TRUE
Lix1_28845	Lix1	436.62/530.3/571.01	21136/62911	530.3	42024	6.3056	5217.1	15789	330.22	1	0	0	0	TRUE
Erbb2ip_26545	Erbb2ip	22.945/13.156/31.045	1393.6/9080.7	22.945	5237.1	7.7732	80.718	249.53	330.08	1	0	0	0	TRUE
Cd36_2405	Cd36	5.2446/10.12/3.3263	101.35/3901.3	5.2446	2001.3	8.3249	13.726	36.575	330.06	1	0	0	0	TRUE
Olfr191_64214	Olfr191	184.22/107.27/255.02	10079/31384	184.22	20731	6.8065	5466.3	3882.1	329.78	1	0	0	0	TRUE
Awat1_63438	Awat1	21.634/99.178/195.14	9694.1/17787	99.178	13740	7.0998	7611.1	1711.5	329.73	1	0	0	0	TRUE
Creb3l1_20273	Creb3l1	164.55/165.97/85.375	19175/19276	164.55	19226	6.8597	3135.4	3343	329.67	1	0	0	0	TRUE
Ndn_11429	Ndn	22.945/18.216/46.568	25.337/10436	22.945	5230.4	7.7713	290.2	249.53	329.66	1	0	0	0	TRUE
Mex3a_38719	Mex3a	28.19/19.228/34.372	466.21/11502	28.19	5984.2	7.6798	59.262	326.78	329.48	1	0	0	0	TRUE
Bmp3_49700	Bmp3	75.392/38.457/69.852	3005/18757	69.852	10881	7.2629	508.18	1077.7	329.33	1	0	0	0	TRUE
Thrsp_17620	Thrsp	0.65558/20.24/9.9789	0/6063.4	9.9789	3031.7	8.1097	96.111	84.191	329.32	1	0	0	0	TRUE
Prrc2a_23086	Prrc2a	189.46/126.5/77.613	14326/17911	126.5	16119	6.9821	3177	2360.7	329.14	1	0	0	0	TRUE
Cldn2_2961	Cldn2	21.634/76.913/11.088	410.46/9638	21.634	5024.2	7.7945	1583.5	231.04	329.12	1	0	0	0	TRUE
Usp19_36847	Usp19	1.9667/0/4.4351	10.135/2114	1.9667	1062.1	8.4852	4.9803	10.379	329.05	1	0	0	0	TRUE
1700006E09Rik_41652	1700006E09Rik	55.069/25.3/67.635	5447.5/13117	55.069	9282	7.3713	522.02	787.77	328.74	1	0	0	0	TRUE
Rad21l_76951	Rad21l	52.446/82.986/43.242	5265.1/12703	52.446	8984.2	7.3933	508.68	738.76	328.61	1	0	0	0	TRUE
Bpnt1_19439	Bpnt1	329.76/69.829/129.73	4150.3/28568	129.73	16359	6.9675	21800	2440.6	328.51	1	0	0	0	TRUE
Gamt_6135	Gamt	0.65558/8.0962/47.677	2280.4/2998.1	8.0962	2639.2	8.1812	811	64.169	328.46	1	0	0	0	TRUE
Cd1d1_2368	Cd1d1	4.5891/8.0962/2.2175	136.82/3517	4.5891	1826.9	8.3534	8.9619	30.785	328.44	1	0	0	0	TRUE
Mageb1_10271	Mageb1	0/0/8.8701	0/1057	0.65558	528.5	8.3212	39.339	2.5846	328.33	1	0	0	0	TRUE
Plekhs1_56911	Plekhs1	82.603/90.07/110.88	4575.9/21092	90.07	12834	7.1389	244.33	1507.1	328.27	1	0	0	0	TRUE
Eomes_4953	Eomes	24.256/20.24/19.958	2863.1/6726.4	20.24	4794.8	7.8188	8.1042	211.76	328.1	1	0	0	0	TRUE
Iqub_54150	Iqub	24.912/29.349/2.2175	2761.8/8225.4	24.912	5493.6	7.7283	267.36	277.91	328.04	1	0	0	0	TRUE
Ddx17_29806	Ddx17	55.724/51.613/82.048	8386.6/10272	55.724	9329.4	7.3618	354.93	800.15	327.84	1	0	0	0	TRUE
Wt1_18936	Wt1	83.259/57.685/69.852	3040.5/18623	69.852	10832	7.2563	163.88	1077.7	327.82	1	0	0	0	TRUE
Nphs1_23749	Nphs1	51.135/49.589/184.05	3881.7/13741	51.135	8811.4	7.4011	8835	714.55	327.72	1	0	0	0	TRUE
Ivns1abp_50612	Ivns1abp	10.489/0/0	1054/0	0.65558	527.02	8.3171	55.012	2.5846	327.41	1	0	0	0	TRUE
Fam43b_75797	Fam43b	25.568/9.1082/34.372	1935.8/9215.2	25.568	5575.5	7.7135	174.21	287.53	327.3	1	0	0	0	TRUE
Fgf4_5553	Fgf4	23.601/204.43/37.698	0/14385	37.698	7192.5	7.5383	13999	478.55	327.06	1	0	0	0	TRUE
2310003H01Rik_37511	2310003H01Rik	0.65558/0/0	5.0675/1047.4	0.65558	526.23	8.315	0.21489	2.5846	326.92	1	0	0	0	TRUE
Prdm5_36143	Prdm5	0/19.228/8.8701	20.27/5554.1	8.8701	2787.2	8.142	92.986	72.243	326.88	1	0	0	0	TRUE
Cyp26a1_3837	Cyp26a1	24.912/11.132/14.414	2939.1/4708.5	14.414	3823.8	7.955	60.49	135.91	326.76	1	0	0	0	TRUE
Satl1_39786	Satl1	0/11.132/4.4351	0/3555.4	4.4351	1777.7	8.3543	32.261	29.459	326.71	1	0	0	0	TRUE
9430016H08Rik_32333	9430016H08Rik	3.9335/0/1.1088	577.69/884.04	1.1088	730.87	8.439	4.6042	5.0105	326.01	1	0	0	0	TRUE
Mtm1_11055	Mtm1	72.769/41.493/93.136	3998.2/18133	72.769	11065	7.2289	696.51	1137.4	325.95	1	0	0	0	TRUE
Lce3e_34516	Lce3e	133.74/269.2/158.55	8057.3/29020	158.55	18538	6.8604	6428.9	3182.7	325.79	1	0	0	0	TRUE
Triml1_63115	Triml1	36.712/35.421/69.852	3760.1/10320	36.712	7040.2	7.5446	549.95	462.18	325.76	1	0	0	0	TRUE
Chst7_26608	Chst7	25.568/20.24/21.066	1844.6/7927.6	21.066	4886.1	7.791	10.471	223.14	325.69	1	0	0	0	TRUE
Sec11c_27982	Sec11c	5.9002/5.0601/5.5438	10.135/4074.3	5.5438	2042.2	8.2865	0.1805	39.293	324.91	1	0	0	0	TRUE
Kctd14_59770	Kctd14	17.701/3.0361/9.9789	1165.5/4814.2	9.9789	2989.9	8.0897	53.914	84.191	324.76	1	0	0	0	TRUE
Qk_14244	Qk	1.9667/12.144/15.523	1287.1/5506.1	12.144	3396.6	8.0139	57.498	108.71	324.61	1	0	0	0	TRUE
Smc6_30312	Smc6	0.65558/2.024/1.1088	456.07/999.35	1.1088	727.71	8.4328	0.52155	5.0105	324.61	1	0	0	0	TRUE
Vmn1r197_51607	Vmn1r197	15.734/10.12/13.305	0/7206.9	13.305	3603.4	7.9771	8.0214	122.44	324.45	1	0	0	0	TRUE
Proca1_54975	Proca1	11.8/14.168/2.2175	3319.2/3344	11.8	3331.6	8.0243	48.719	104.72	324.42	1	0	0	0	TRUE
Mum1l1_63495	Mum1l1	463.49/44.529/114.2	6141.8/23514	114.2	14828	7.0081	63430	2062.2	324.01	1	0	0	0	TRUE
Krtap22-2_33355	Krtap22-2	11.8/25.3/21.066	1581/8139	21.066	4860	7.7833	51.893	223.14	323.94	1	0	0	0	TRUE
Ttr_18215	Ttr	17.701/42.505/29.937	1312.5/10926	29.937	6119	7.6281	153.84	353.59	323.82	1	0	0	0	TRUE
Ctdsp2_22549	Ctdsp2	1.3112/50.601/79.831	1489.8/15778	50.601	8634	7.3867	1641.9	704.74	323.33	1	0	0	0	TRUE
Sh3pxd2b_67874	Sh3pxd2b	0/4.0481/9.9789	0/3315.2	4.0481	1657.6	8.36	25.781	26.189	323.11	1	0	0	0	TRUE
Wnk3_69062	Wnk3	114.07/51.613/47.677	6876.5/10599	51.613	8737.7	7.3759	1958.2	723.35	322.96	1	0	0	0	TRUE
B020004J07Rik_74989	B020004J07Rik	36.712/27.325/82.048	2731.4/11224	36.712	6977.4	7.5317	1071.7	462.18	322.85	1	0	0	0	TRUE
Vmn1r176_75233	Vmn1r176	28.845/46.553/16.631	1398.6/10503	28.845	5950.7	7.6397	231.37	336.79	322.69	1	0	0	0	TRUE
Ssxb9_73259	Ssxb9	0/0/1.1088	10.135/1028.2	0.65558	519.16	8.2955	0.61468	2.5846	322.52	1	0	0	0	TRUE
Tubb4a_18257	Tubb4a	40.646/13.156/23.284	1261.8/9061.4	23.284	5161.6	7.732	202	254.37	322.18	1	0	0	0	TRUE
Fabp3_5324	Fabp3	0/6.0721/3.3263	501.68/2402.3	3.3263	1452	8.3917	9.3019	20.343	321.19	1	0	0	0	TRUE
control_79442	control	284.52/285.39/82.048	10490/43433	284.52	26962	6.5612	20498	6907.1	320.99	1	0	0	0	TRUE
Olfr1221_66876	Olfr1221	34.746/126.5/165.21	1895.2/29519	126.5	15707	6.9449	4958.6	2360.7	320.67	1	0	0	0	TRUE
Gm15293_77605	Gm15293	75.392/82.986/65.417	3167.2/19122	75.392	11145	7.1889	78.58	1191.8	320.65	1	0	0	0	TRUE
Psmg1_24142	Psmg1	3.9335/2.024/8.8701	278.71/2950	3.9335	1614.4	8.355	14.008	25.238	320.56	1	0	0	0	TRUE
Prss32_35036	Prss32	125.22/59.709/51.003	5336/13751	59.709	9543.4	7.2966	2183.4	876.35	320.36	1	0	0	0	TRUE
Olfr1348_66912	Olfr1348	104.24/65.781/59.873	4398.6/15922	65.781	10160	7.2495	756.88	995.64	319.92	1	0	0	0	TRUE
Olfr195_67206	Olfr195	1.9667/14.168/4.4351	116.55/3363.2	4.4351	1739.9	8.3233	50.414	29.459	319.74	1	0	0	0	TRUE
Rpp25l_35231	Rpp25l	55.069/29.349/85.375	4849.6/13203	55.069	9026.3	7.331	789.99	787.77	319.63	1	0	0	0	TRUE
Pacsin1_19743	Pacsin1	26.879/21.252/78.722	1804/9445.8	26.879	5624.9	7.6568	1359.7	307	319.49	1	0	0	0	TRUE
control_79303	control	29.501/44.529/29.937	1038.8/11031	29.937	6035.1	7.6082	106.56	353.59	319.35	1	0	0	0	TRUE
Zscan5b_51052	Zscan5b	7.8669/43.517/9.9789	1652/4228	9.9789	2940	8.0654	564.63	84.191	319.33	1	0	0	0	TRUE
Vmn1r57_76495	Vmn1r57	10.489/31.373/24.393	2569.2/7975.6	24.393	5272.4	7.6982	121.01	270.35	319.18	1	0	0	0	TRUE
Hsdl2_38534	Hsdl2	59.658/125.49/59.873	6288.7/12761	59.873	9524.8	7.2899	2152.8	879.53	319.15	1	0	0	0	TRUE
Creb3_3406	Creb3	7.2114/12.144/32.154	187.5/6486.2	12.144	3336.8	7.9883	212.36	108.71	318.88	1	0	0	0	TRUE
Lrrc16a_33331	Lrrc16a	19.012/31.373/70.961	800.66/11617	31.373	6209.1	7.5837	860.01	376.01	318.59	1	0	0	0	TRUE
Mpp6_25013	Mpp6	0/14.168/12.196	96.282/6582.3	12.196	3339.3	7.9837	76.32	109.32	318.22	1	0	0	0	TRUE
Olfr1122_67326	Olfr1122	17.701/1.012/0	0/1345.3	1.012	672.64	8.3872	139.77	4.4643	317.87	1	0	0	0	TRUE
Gm15284_77190	Gm15284	98.992/115.37/102.01	3628.3/23369	102.01	13499	7.0341	93.839	1776.3	317.87	1	0	0	0	TRUE
Cmtm1_78489	Cmtm1	1.3112/39.469/17.74	126.69/8388.8	17.74	4257.7	7.8281	371.02	178.23	317.6	1	0	0	0	TRUE
Krt17_9492	Krt17	11.8/16.192/17.74	912.14/7101.2	16.192	4006.7	7.8649	10.842	158.19	317.27	1	0	0	0	TRUE
Cant1_42368	Cant1	25.568/6.0721/5.5438	2077.7/2152.5	6.0721	2115.1	8.225	190.18	44.202	317.22	1	0	0	0	TRUE
Evi2b_54980	Evi2b	2.6223/13.156/17.74	314.18/6678.4	13.156	3496.3	7.9486	65.988	120.66	317.1	1	0	0	0	TRUE
Fbxw28_76939	Fbxw28	3.2779/14.168/22.175	1261.8/6073	14.168	3667.4	7.9179	91.356	132.9	316.9	1	0	0	0	TRUE
Gprin1_20572	Gprin1	93.748/23.276/98.68	5143.5/20266	93.748	12705	7.0672	2495.3	1588.9	316.37	1	0	0	0	TRUE
Cenpj_55772	Cenpj	9.8337/1.012/0	856.4/480.46	1.012	668.43	8.3781	39.423	4.4643	315.88	1	0	0	0	TRUE
Tmem8b_62395	Tmem8b	11.145/1.012/3.3263	0/2853.9	3.3263	1427	8.3666	33.243	20.343	315.64	1	0	0	0	TRUE
Otud3_39179	Otud3	91.781/42.505/52.112	5341.1/11848	52.112	8594.6	7.3384	832.97	732.57	315.62	1	0	0	0	TRUE
Sel1l3_58796	Sel1l3	64.247/202.4/97.571	2726.3/23293	97.571	13009	7.0443	6050.2	1675	315.49	1	0	0	0	TRUE
Krtcap2_27334	Krtcap2	41.301/66.793/41.024	4048.9/10685	41.301	7367.1	7.4445	324.95	539.55	315.39	1	0	0	0	TRUE
Hebp1_7463	Hebp1	47.857/85.01/16.631	6172.2/10061	47.857	8116.5	7.3763	1177.7	654.89	315.29	1	0	0	0	TRUE
Sidt1_69800	Sidt1	1.9667/2.024/0	217.9/1816.1	1.9667	1017	8.4227	1.9357	10.379	315.07	1	0	0	0	TRUE
Chp1_24686	Chp1	1.9667/80.962/56.547	1261.8/16845	56.547	9053.3	7.2977	1787.5	815.74	315	1	0	0	0	TRUE
4930415O20Rik_39850	4930415O20Rik	80.636/63.757/45.459	4013.4/15586	63.757	9799.8	7.2417	309.86	955.46	314.97	1	0	0	0	TRUE
Efcab1_29171	Efcab1	333.03/195.32/211.77	7920.4/35496	211.77	21708	6.6729	7487.4	4669.5	314.58	1	0	0	0	TRUE
Zfp113_24457	Zfp113	5.2446/13.156/12.196	451/6149.9	12.196	3300.4	7.9668	24.624	109.32	314.5	1	0	0	0	TRUE
Odc1_12075	Odc1	345.49/357.24/327.09	14397/45749	345.49	30073	6.4396	238.43	8936.9	314.46	1	0	0	0	TRUE
Adcyap1r1_307	Adcyap1r1	6.5558/24.288/44.351	3719.5/6630.3	24.288	5174.9	7.6772	358.47	268.83	314.14	1	0	0	0	TRUE
Atp6v1c2_33414	Atp6v1c2	3.2779/5.0601/17.74	10.135/3709.1	5.0601	1859.6	8.2622	81.981	34.922	313.83	1	0	0	0	TRUE
Tcaf3_73470	Tcaf3	0/2.024/0	10.135/999.35	0.65558	504.74	8.2549	2.0484	2.5846	313.56	1	0	0	0	TRUE
Sh2b2_19625	Sh2b2	23.601/2.024/8.8701	70.944/5275.4	8.8701	2673.2	8.0818	131.93	72.243	313.46	1	0	0	0	TRUE
B230217C12Rik_32357	B230217C12Rik	10.489/14.168/13.305	1287.1/5669.4	13.305	3478.3	7.9261	4.3371	122.44	313.14	1	0	0	0	TRUE
Sh3d19_20772	Sh3d19	1.9667/14.168/0	1089.5/932.09	1.9667	1010.8	8.4138	76.373	10.379	313.13	1	0	0	0	TRUE
Tcea1_17186	Tcea1	147.51/119.42/47.677	9770.1/19756	119.42	14763	6.9379	2967.9	2187.6	313.09	1	0	0	0	TRUE
Unc80_70813	Unc80	0.65558/2.024/0	25.337/980.14	0.65558	502.74	8.2492	1.1512	2.5846	312.31	1	0	0	0	TRUE
Elf5_4848	Elf5	36.057/14.168/22.175	369.92/9320.9	22.175	4845.4	7.7082	128.41	238.63	312.23	1	0	0	0	TRUE
Idh3a_31633	Idh3a	40.646/113.35/62.091	1114.8/17969	62.091	9542	7.2409	1543.5	922.69	312.09	1	0	0	0	TRUE
Vps52_56356	Vps52	200.61/126.5/82.048	3015.1/27559	126.5	15287	6.9057	3733.8	2360.7	312.03	1	0	0	0	TRUE
Kctd12_61437	Kctd12	60.969/31.373/27.719	2042.2/10118	31.373	6080.3	7.5535	444.64	376.01	311.95	1	0	0	0	TRUE
Gm10921_76966	Gm10921	1.9667/11.132/9.9789	0/5736.7	9.9789	2868.3	8.0298	32.762	84.191	311.52	1	0	0	0	TRUE
Padi1_12765	Padi1	0.65558/0/2.2175	481.41/518.9	0.65558	500.15	8.2418	1.4347	2.5846	310.7	1	0	0	0	TRUE
Dsg2_4490	Dsg2	2.6223/103.23/36.589	1145.2/12252	36.589	6698.5	7.4776	2797.1	460.15	310.56	1	0	0	0	TRUE
Olfr15_12130	Olfr15	1.3112/3.0361/1.1088	116.55/1431.8	1.3112	774.16	8.3897	1.5081	6.1963	310.48	1	0	0	0	TRUE
Aim1_537	Aim1	20.323/27.325/47.677	1449.3/9590	27.325	5519.6	7.6066	231.62	313.7	310.1	1	0	0	0	TRUE
Slc22a17_26509	Slc22a17	85.881/38.457/21.066	1692.5/12117	38.457	6904.8	7.4514	1275.7	491.24	309.8	1	0	0	0	TRUE
Dnm1l_39922	Dnm1l	26.879/7.0841/67.635	3298.9/7610.5	26.879	5454.7	7.6125	1026.4	307	309.78	1	0	0	0	TRUE
Slc25a31_39349	Slc25a31	19.012/6.0721/8.8701	496.61/4775.8	8.8701	2636.2	8.0617	55.341	72.243	309.11	1	0	0	0	TRUE
Slc31a1_16040	Slc31a1	8.5225/11.132/11.088	907.08/5189	11.088	3048	7.9787	3.2909	96.558	309.06	1	0	0	0	TRUE
Cldn10_26060	Cldn10	38.024/25.3/11.088	2645.2/7812.3	25.3	5228.7	7.6355	181.94	283.6	308.98	1	0	0	0	TRUE
Foxo3_24914	Foxo3	50.48/74.889/56.547	3233/14510	56.547	8871.4	7.2684	186.63	815.74	308.63	1	0	0	0	TRUE
4933428G20Rik_78153	4933428G20Rik	73.425/12.144/6.6526	430.73/6024.9	12.144	3227.8	7.9404	1892.7	108.71	308.42	1	0	0	0	TRUE
Apoc4_86	Apoc4	5.2446/2.024/1.1088	1383.4/643.81	2.024	1013.6	8.3902	5.605	10.767	308.29	1	0	0	0	TRUE
1700015E13Rik_43295	1700015E13Rik	59.002/11.132/23.284	1905.4/7966	23.284	4935.7	7.6674	711.72	254.37	308.01	1	0	0	0	TRUE
Zfp131_38512	Zfp131	1.3112/8.0962/111.99	0/4948.7	8.0962	2474.4	8.0882	5419.5	64.169	307.88	1	0	0	0	TRUE
control_79325	control	110.79/129.54/121.96	5883.3/23552	121.96	14718	6.9033	91.083	2249.4	307.75	1	0	0	0	TRUE
Gins4_49361	Gins4	66.869/111.32/93.136	3749.9/20842	93.136	12296	7.0294	510.34	1575.2	307.47	1	0	0	0	TRUE
Slc24a5_69149	Slc24a5	0.65558/22.264/14.414	1662.1/5534.9	14.414	3598.5	7.8674	125.46	135.91	307.43	1	0	0	0	TRUE
Ankrd34a_74938	Ankrd34a	0/0/1.1088	0/989.74	0.65558	494.87	8.2265	0.61468	2.5846	307.41	1	0	0	0	TRUE
Fbxo43_44444	Fbxo43	0/3.0361/0	0/989.74	0.65558	494.87	8.2265	4.6088	2.5846	307.41	1	0	0	0	TRUE
Slpi_16126	Slpi	33.435/27.325/145.25	1479.7/11012	33.435	6245.9	7.5031	6269.8	408.77	307.27	1	0	0	0	TRUE
control_79323	control	7.8669/12.144/13.305	146.96/6284.4	12.144	3215.7	7.935	9.8214	108.71	307.26	1	0	0	0	TRUE
Tbc1d5_38211	Tbc1d5	0/5.0601/3.3263	141.89/2632.9	3.3263	1387.4	8.3261	7.0351	20.343	306.87	1	0	0	0	TRUE
Tcl1b5_21045	Tcl1b5	5.9002/24.288/21.066	202.7/9003.8	21.066	4603.2	7.705	120.2	223.14	306.75	1	0	0	0	TRUE
Vmn1r59_73547	Vmn1r59	11.145/23.276/9.9789	1454.4/4612.4	11.145	3033.4	7.9649	74.268	97.207	306.53	1	0	0	0	TRUE
Ttc32_41771	Ttc32	226.17/329.92/298.26	15892/37264	298.26	26578	6.4728	3099.2	7352.9	306.47	1	0	0	0	TRUE
Gm813_70712	Gm813	38.024/39.469/100.9	2244.9/11637	39.469	6940.8	7.4224	1887.8	508.3	306.11	1	0	0	0	TRUE
Scn4b_73427	Scn4b	26.223/29.349/41.024	1135.1/10282	29.349	5708.5	7.5556	73.045	344.51	305.97	1	0	0	0	TRUE
Ankrd13c_74110	Ankrd13c	5.9002/9.1082/7.7613	15.202/4766.1	7.7613	2390.7	8.0927	2.6389	60.747	305.73	1	0	0	0	TRUE
Dcaf11_21398	Dcaf11	41.301/108.29/43.242	430.73/14289	43.242	7359.8	7.3783	2117.3	573.11	305.62	1	0	0	0	TRUE
Irs1_8741	Irs1	71.458/65.781/26.61	5229.6/14183	65.781	9706.4	7.1835	783.29	995.64	305.53	1	0	0	0	TRUE
Agps_57576	Agps	0/2.024/4.4351	0/2008.3	2.024	1004.2	8.3767	4.9549	10.767	305.41	1	0	0	0	TRUE
Dbx1_4043	Dbx1	32.779/183.18/67.635	2913.8/16816	67.635	9864.9	7.1674	7282.3	1032.8	304.86	1	0	0	0	TRUE
Olfr1368_65553	Olfr1368	17.045/8.0962/17.74	2457.7/5506.1	17.045	3981.9	7.7861	40.283	169.16	304.84	1	0	0	0	TRUE
Olfr857_64135	Olfr857	86.536/28.337/113.09	5244.8/17969	86.536	11607	7.051	2046.3	1429.5	304.7	1	0	0	0	TRUE
Lcn8_43963	Lcn8	76.047/57.685/24.393	7895.1/9849.4	57.685	8872.3	7.2403	722.77	837.43	304.6	1	0	0	0	TRUE
Tyw3_52825	Tyw3	58.347/45.541/27.719	2868.2/12309	45.541	7588.8	7.3494	240.8	613.52	304.54	1	0	0	0	TRUE
Dhx32_47111	Dhx32	81.947/82.986/97.571	2341.2/20218	82.986	11279	7.0695	106.91	1352.6	304.43	1	0	0	0	TRUE
Hspa14_21857	Hspa14	131.77/264.14/107.55	10023/20631	131.77	15327	6.8511	9053.7	2491.6	304.42	1	0	0	0	TRUE
Vmn1r220_51582	Vmn1r220	13.112/14.168/19.958	1444.2/5602.1	14.168	3523.2	7.8601	17.317	132.9	304.39	1	0	0	0	TRUE
Olfr1426_66549	Olfr1426	5.9002/12.144/12.196	506.75/5852	12.144	3179.4	7.9186	19.495	108.71	303.77	1	0	0	0	TRUE
A830080D01Rik_72908	A830080D01Rik	169.14/104.24/75.396	9704.2/16470	104.24	13087	6.9585	2522	1827.8	303.67	1	0	0	0	TRUE
Dstn_24774	Dstn	116.69/63.757/89.81	5989.7/17719	89.81	11855	7.0285	700.72	1501.3	303.63	1	0	0	0	TRUE
Zfp607_75079	Zfp607	14.423/21.252/45.459	1216.2/7946.8	21.252	4581.5	7.686	316.31	225.72	303.53	1	0	0	0	TRUE
Ralgds_14700	Ralgds	1.3112/18.216/6.6526	800.66/3488.1	6.6526	2144.4	8.1311	81.126	49.746	303.09	1	0	0	0	TRUE
Mup10_77211	Mup10	1.3112/8.0962/5.5438	937.48/2873.1	5.5438	1905.3	8.1864	12.215	39.293	303.07	1	0	0	0	TRUE
Mocs1_25281	Mocs1	91.781/23.276/41.024	1738.1/12357	41.024	7047.8	7.39	1445.6	534.79	302.99	1	0	0	0	TRUE
Negr1_70375	Negr1	7.8669/72.865/4.4351	212.83/4564.4	7.8669	2388.6	8.0741	2118.3	61.822	302.79	1	0	0	0	TRUE
control_79404	control	19.012/36.433/84.266	1484.8/11541	36.433	6512.7	7.443	1295.8	457.56	302.76	1	0	0	0	TRUE
4930539E08Rik_52293	4930539E08Rik	17.701/60.721/53.221	673.97/16047	53.221	8360.6	7.2688	658.96	753.15	302.71	1	0	0	0	TRUE
Tlr6_17742	Tlr6	81.947/17.204/31.045	6972.8/4737.3	31.045	5855.1	7.5137	1391.3	370.87	302.42	1	0	0	0	TRUE
Prss44_39354	Prss44	321.23/134.6/74.287	6430.6/24446	134.6	15438	6.8311	19235	2562.6	302.31	1	0	0	0	TRUE
Olfr1484_64681	Olfr1484	5.2446/6.0721/31.045	0/4026.2	6.0721	2013.1	8.1538	312.17	44.202	301.88	1	0	0	0	TRUE
Slc35f6_41288	Slc35f6	58.347/20.24/59.873	7271.8/10445	58.347	8858.5	7.2219	727.2	850.1	301.82	1	0	0	0	TRUE
Olfr670_73148	Olfr670	150.13/302.59/88.701	8969.4/24167	150.13	16568	6.7766	13510	2960.8	301.73	1	0	0	0	TRUE
Tomm7_27647	Tomm7	0/0/0	0/970.53	0.65558	485.26	8.1983	0	2.5846	301.44	1	0	0	0	TRUE
Ssfa2_35962	Ssfa2	9.1781/22.264/13.305	603.03/6092.2	13.305	3347.6	7.8709	48.65	122.44	301.33	1	0	0	0	TRUE
Trib2_55257	Trib2	45.891/26.312/70.961	4474.6/10609	45.891	7541.5	7.3296	505.91	619.72	301.1	1	0	0	0	TRUE
Stmn4_24901	Stmn4	32.123/40.481/33.263	1277/10916	33.263	6096.5	7.4754	26.698	406.02	300.91	1	0	0	0	TRUE
Myeov2_29473	Myeov2	1.3112/0/2.2175	567.56/932.09	1.3112	749.82	8.3437	1.2703	6.1963	300.7	1	0	0	0	TRUE
Zbtb39_69831	Zbtb39	6.5558/14.168/39.915	2199.3/4756.5	14.168	3477.9	7.8414	360.43	132.9	300.46	1	0	0	0	TRUE
Ctrc_43026	Ctrc	1.9667/3.0361/12.196	380.06/2181.3	3.0361	1280.7	8.3109	42.528	18.092	300.37	1	0	0	0	TRUE
2310079G19Rik_34853	2310079G19Rik	30.157/32.385/46.568	2954.3/8994.2	32.385	5974.3	7.4837	103.07	392	300.11	1	0	0	0	TRUE
Frg1_5848	Frg1	24.256/32.385/51.003	212.83/11733	32.385	5972.8	7.4833	206.36	392	300.04	1	0	0	0	TRUE
Zfp275_20791	Zfp275	28.19/49.589/27.719	1195.9/9695.7	28.19	5445.8	7.5438	229.07	326.78	299.69	1	0	0	0	TRUE
Ercc5_18986	Ercc5	4.5891/10.12/14.414	618.23/4948.7	10.12	2783.5	7.9681	24.515	85.745	299.5	1	0	0	0	TRUE
1700003F12Rik_41721	1700003F12Rik	53.757/82.986/100.9	3749.9/18430	82.986	11090	7.0451	587.56	1352.6	299.29	1	0	0	0	TRUE
Cyp11b2_3804	Cyp11b2	1.9667/12.144/5.5438	101.35/3661.1	5.5438	1881.2	8.1681	28.18	39.293	299.23	1	0	0	0	TRUE
Slc39a10_57202	Slc39a10	41.301/49.589/113.09	6547.2/9224.8	49.589	7886	7.2845	2050.8	686.25	299.14	1	0	0	0	TRUE
Vmn2r95_70719	Vmn2r95	186.84/184.19/185.16	4084.4/33661	185.16	18873	6.6637	1.8817	3908.5	298.91	1	0	0	0	TRUE
Ythdf2_53829	Ythdf2	3.2779/15.18/22.175	714.51/6524.6	15.18	3619.6	7.8058	95.298	145.41	298.9	1	0	0	0	TRUE
Troap_44337	Troap	40.646/28.337/47.677	1114.8/12703	40.646	6909.1	7.3744	100.48	528.32	298.82	1	0	0	0	TRUE
Shfm1_15730	Shfm1	1.3112/5.0601/8.8701	5.0675/3536.2	5.0601	1770.6	8.1915	14.285	34.922	298.77	1	0	0	0	TRUE
Olfr56_12235	Olfr56	28.845/15.18/21.066	1145.2/7821.9	21.066	4483.6	7.667	47.58	223.14	298.74	1	0	0	0	TRUE
Hoxd13_7882	Hoxd13	32.779/64.769/46.568	1241.5/13856	46.568	7549	7.3103	260.71	631.78	298.48	1	0	0	0	TRUE
Gtf2h3_52755	Gtf2h3	5.2446/3.0361/38.807	101.35/3517	5.2446	1809.2	8.1793	565.65	36.575	298.28	1	0	0	0	TRUE
Colgalt1_60116	Colgalt1	174.38/116.38/118.64	6521.8/21496	118.64	14009	6.8716	1556.4	2168.7	298.27	1	0	0	0	TRUE
Tmem59_24619	Tmem59	119.32/80.962/36.589	5209.3/16537	80.962	10873	7.0518	1720	1309.3	298.27	1	0	0	0	TRUE
Etl4_52504	Etl4	31.468/8.0962/5.5438	3496.5/1297.2	8.0962	2396.9	8.0423	276.37	64.169	298.21	1	0	0	0	TRUE
Spata17_41118	Spata17	15.078/14.168/33.263	871.6/6313.2	15.078	3592.4	7.8041	165.75	144.14	297.97	1	0	0	0	TRUE
Man2a1_10307	Man2a1	22.945/4.0481/2.2175	739.85/2315.8	4.0481	1527.8	8.2425	180.23	26.189	297.76	1	0	0	0	TRUE
Tekt2_19946	Tekt2	49.168/19.228/75.396	3212.8/12396	49.168	7804.3	7.2815	792.14	678.6	297.7	1	0	0	0	TRUE
Mmrn1_36348	Mmrn1	19.012/70.841/62.091	3967.8/14241	62.091	9104.3	7.1731	966.18	922.69	297.68	1	0	0	0	TRUE
Fyn_5932	Fyn	15.078/13.156/15.523	324.32/6851.3	15.078	3587.8	7.8023	1.9459	144.14	297.58	1	0	0	0	TRUE
Plagl1_19051	Plagl1	14.423/15.18/14.414	2285.4/4679.7	14.423	3482.5	7.8194	0.28698	136.02	297.37	1	0	0	0	TRUE
Lyg2_71433	Lyg2	1.3112/10.12/9.9789	547.29/4929.5	9.9789	2738.4	7.963	37.575	84.191	297.36	1	0	0	0	TRUE
Lamc3_19649	Lamc3	0/3.0361/3.3263	45.607/2488.8	3.0361	1267.2	8.2956	4.6509	18.092	297.2	1	0	0	0	TRUE
Cnbp_3075	Cnbp	277.97/211.51/153.01	2716.2/38283	211.51	20500	6.592	3919.3	4661.8	297.14	1	0	0	0	TRUE
Tns4_55087	Tns4	0/8.0962/0	5.0675/951.31	0.65558	478.19	8.1771	32.774	2.5846	297.04	1	0	0	0	TRUE
Klf10_17646	Klf10	0/0/0	5.0675/951.31	0.65558	478.19	8.1771	0	2.5846	297.04	1	0	0	0	TRUE
Fxyd7_25901	Fxyd7	72.769/108.29/79.831	1525.3/19920	79.831	10723	7.0517	429.78	1285.2	296.87	1	0	0	0	TRUE
Wrb_36815	Wrb	0/6.0721/13.305	0/3959	6.0721	1979.5	8.1295	44.594	44.202	296.82	1	0	0	0	TRUE
Cbln4_57853	Cbln4	6.5558/36.433/7.7613	557.42/4083.9	7.7613	2320.7	8.0498	411.75	60.747	296.75	1	0	0	0	TRUE
Tomt_77077	Tomt	5.9002/19.228/9.9789	988.15/4468.3	9.9789	2728.2	7.9576	51.094	84.191	296.25	1	0	0	0	TRUE
Pafah1b3_12486	Pafah1b3	26.879/61.733/55.438	2265.2/14519	55.438	8392.3	7.2164	427.63	794.74	295.73	1	0	0	0	TRUE
Cldnd1_56214	Cldnd1	24.256/175.08/94.245	1890.2/21947	94.245	11919	6.9675	5716.3	1600	295.61	1	0	0	0	TRUE
Rhobtb3_39312	Rhobtb3	53.757/66.793/19.958	7727.9/8705.9	53.757	8216.9	7.2296	656.18	763.17	295.49	1	0	0	0	TRUE
Ms4a5_68174	Ms4a5	28.845/7.0841/96.462	2523.6/8379.2	28.845	5451.4	7.5132	2522.8	336.79	295.48	1	0	0	0	TRUE
Degs1_4169	Degs1	5.9002/4.0481/1.1088	1231.4/1796.9	4.0481	1514.2	8.2295	6.035	26.189	295.08	1	0	0	0	TRUE
Tamm41_33723	Tamm41	0/11.132/2.2175	0/2056.4	2.2175	1028.2	8.3213	42.195	12.099	294.96	1	0	0	0	TRUE
Ube2g2_18386	Ube2g2	45.891/18.216/12.196	684.11/7360.6	18.216	4022.4	7.7099	401.05	184.51	294.78	1	0	0	0	TRUE
Thsd4_52232	Thsd4	25.568/48.577/97.571	2032.1/13299	48.577	7665.6	7.2728	1464.9	667.88	294.74	1	0	0	0	TRUE
Gm13242_77531	Gm13242	0/3.0361/17.74	81.079/2431.1	3.0361	1256.1	8.2829	112.71	18.092	294.6	1	0	0	0	TRUE
Grina_27645	Grina	38.024/17.204/56.547	4839.4/8196.6	38.024	6518	7.3842	388.28	483.99	294.55	1	0	0	0	TRUE
control_79076	control	28.19/10.12/18.849	912.14/7303	18.849	4107.6	7.6934	81.722	192.93	294.37	1	0	0	0	TRUE
Prss3_18129	Prss3	6.5558/7.0841/62.091	5.0675/4333.7	7.0841	2169.4	8.0687	1513	53.966	294.35	1	0	0	0	TRUE
Ptk7_36839	Ptk7	196.67/120.43/212.88	10105/28578	196.67	19341	6.6125	3037.9	4233.5	294.23	1	0	0	0	TRUE
Uck2_44986	Uck2	26.223/1.012/14.414	1900.3/4987.2	14.414	3443.7	7.804	159.53	135.91	294.16	1	0	0	0	TRUE
Pcsk7_12650	Pcsk7	11.8/18.216/6.6526	1535.4/4506.7	11.8	3021.1	7.8832	33.832	104.72	294.07	1	0	0	0	TRUE
BC051019_25714	BC051019	0.65558/1.012/3.3263	5.0675/1239.6	1.012	622.33	8.2752	2.7414	4.4643	294.06	1	0	0	0	TRUE
Mgmt_10668	Mgmt	24.256/101.2/51.003	851.33/14942	51.003	7896.8	7.2467	1617.7	712.12	294.01	1	0	0	0	TRUE
Olfr686_67468	Olfr686	85.881/108.29/46.568	542.22/21717	85.881	11129	7.0013	1023.7	1415.3	293.56	1	0	0	0	TRUE
C5ar1_1837	C5ar1	3.9335/31.373/28.828	5.0675/10820	28.828	5412.5	7.5038	313.1	336.52	293.48	1	0	0	0	TRUE
Sppl2c_61117	Sppl2c	190.77/187.22/213.99	14549/23187	190.77	18868	6.6205	275.83	4066.1	292.9	1	0	0	0	TRUE
Tmem106b_37547	Tmem106b	387.45/528.27/238.38	12978/47527	387.45	30252	6.2832	21026	10406	292.77	1	0	0	0	TRUE
Bdnf_1535	Bdnf	83.914/236.81/118.64	4783.7/22716	118.64	13750	6.8447	7585.5	2168.7	292.71	1	0	0	0	TRUE
Fmo2_23990	Fmo2	51.791/26.312/23.284	2315.8/7850.7	26.312	5083.3	7.5403	329.16	298.56	292.67	1	0	0	0	TRUE
Naa35_44328	Naa35	0/0/8.8701	0/941.7	0.65558	470.85	8.1548	39.339	2.5846	292.47	1	0	0	0	TRUE
Nckap5_52997	Nckap5	0/3.0361/0	0/941.7	0.65558	470.85	8.1548	4.6088	2.5846	292.47	1	0	0	0	TRUE
Mcts2_28290	Mcts2	0/0/0	0/941.7	0.65558	470.85	8.1548	0	2.5846	292.47	1	0	0	0	TRUE
Plekhg2_47130	Plekhg2	12.456/49.589/19.958	1657.1/6812.9	19.958	4235	7.6591	467.14	207.9	292.33	1	0	0	0	TRUE
Fbxl22_40253	Fbxl22	74.08/22.264/65.417	5310.7/13193	65.417	9252	7.1222	968.6	988.38	292.21	1	0	0	0	TRUE
Arpc1b_1103	Arpc1b	11.8/18.216/44.351	1256.7/6716.8	18.216	3986.8	7.6971	362.08	184.51	292.16	1	0	0	0	TRUE
Tmem9b_25355	Tmem9b	8.5225/25.3/15.523	167.23/7005.1	15.523	3586.2	7.7622	72.304	149.71	291.82	1	0	0	0	TRUE
Mmachc_29952	Mmachc	13.767/13.156/6.6526	1155.4/5275.4	13.156	3215.4	7.8279	21.335	120.66	291.53	1	0	0	0	TRUE
Dennd1c_36152	Dennd1c	55.069/42.505/67.635	3689.1/12780	55.069	8234.7	7.1985	157.88	787.77	291.43	1	0	0	0	TRUE
Olfr618_67386	Olfr618	54.413/51.613/31.045	3020.2/12751	51.613	7885.8	7.2279	215.43	723.35	291.29	1	0	0	0	TRUE
Usp15_6229	Usp15	247.81/133.59/133.05	17731/11877	133.59	14804	6.7814	6523.5	2537.1	291.25	1	0	0	0	TRUE
Foxn4_50482	Foxn4	38.024/4.0481/8.8701	1054/3910.9	8.8701	2482.5	7.9751	436.59	72.243	291.03	1	0	0	0	TRUE
Cacfd1_72354	Cacfd1	31.468/37.445/44.351	4332.7/8417.6	37.445	6375.2	7.3738	41.707	474.33	291	1	0	0	0	TRUE
Rufy3_22742	Rufy3	19.012/36.433/43.242	1728/10791	36.433	6259.6	7.3858	174.93	457.56	290.93	1	0	0	0	TRUE
Vmn2r35_75764	Vmn2r35	12.456/18.216/13.305	1013.5/5448.4	13.305	3230.9	7.8197	12.42	122.44	290.79	1	0	0	0	TRUE
Clec4b2_72630	Clec4b2	20.323/17.204/27.719	2062.5/6457.4	20.323	4259.9	7.6426	32.214	212.89	290.57	1	0	0	0	TRUE
Phyhipl_36316	Phyhipl	0.65558/11.132/8.8701	344.59/4612.4	8.8701	2478.5	7.9728	36.298	72.243	290.56	1	0	0	0	TRUE
control_79272	control	135.05/191.27/210.66	6613/30817	191.27	18715	6.605	1768.5	4080.2	289.99	1	0	0	0	TRUE
Bdnf_1534	Bdnf	10.489/4.0481/4.4351	2214.5/941.7	4.4351	1578.1	8.1826	18.402	29.459	289.94	1	0	0	0	TRUE
Sugp2_60081	Sugp2	20.323/61.733/86.484	3187.4/14481	61.733	8834.2	7.1379	1163.7	915.7	289.9	1	0	0	0	TRUE
Gsk3b_25146	Gsk3b	25.568/48.577/52.112	527.02/14548	48.577	7537.6	7.2485	270.96	667.88	289.79	1	0	0	0	TRUE
Tnfsf13_34662	Tnfsf13	0/2.024/0	0/932.09	0.65558	466.04	8.1401	2.0484	2.5846	289.48	1	0	0	0	TRUE
Ssna1_32900	Ssna1	38.679/31.373/35.48	304.05/11935	35.48	6119.3	7.3903	13.553	441.92	289.4	1	0	0	0	TRUE
Ddit3_4106	Ddit3	155.37/45.541/45.459	20.27/14395	45.541	7207.4	7.275	6031.5	613.52	289.14	1	0	0	0	TRUE
Tomm5_32973	Tomm5	27.534/47.565/4.4351	1312.5/9032.6	27.534	5172.5	7.5023	467.4	316.86	289.04	1	0	0	0	TRUE
Lce3e_34518	Lce3e	0/0/0	527.02/403.59	0.65558	465.3	8.1378	0	2.5846	289.02	1	0	0	0	TRUE
Acsm1_50572	Acsm1	31.468/27.325/26.61	1236.5/9051.8	27.325	5144.1	7.505	8.8384	313.7	288.9	1	0	0	0	TRUE
Cmtm5_30386	Cmtm5	51.135/58.697/51.003	3516.8/12021	51.135	7768.9	7.2195	28.6	714.55	288.72	1	0	0	0	TRUE
Elf3_4845	Elf3	2.6223/1.012/0	1114.8/105.7	1.012	610.27	8.247	1.8086	4.4643	288.35	1	0	0	0	TRUE
Gabpb2_53669	Gabpb2	0.65558/1.012/2.2175	0/1220.4	1.012	610.18	8.2468	0.79015	4.4643	288.31	1	0	0	0	TRUE
Actl6b_45384	Actl6b	123.9/73.877/92.027	6825.9/16057	92.027	11441	6.9425	672.78	1550.5	288.23	1	0	0	0	TRUE
Tcp10a_17305	Tcp10a	9.8337/17.204/24.393	1074.3/6495.8	17.204	3785	7.7003	53	171.23	287.94	1	0	0	0	TRUE
Mark2_4883	Mark2	1.9667/9.1082/51.003	1125/3872.5	9.1082	2498.7	7.9501	903.09	74.771	287.92	1	0	0	0	TRUE
Brdt_50334	Brdt	4.5891/10.12/7.7613	1140.2/3363.2	7.7613	2251.7	8.0063	7.8138	60.747	287.9	1	0	0	0	TRUE
Lce1a1_30041	Lce1a1	81.292/78.937/69.852	5037.1/15605	78.937	10321	7.0127	44.044	1266.2	287.83	1	0	0	0	TRUE
Fmo1_5760	Fmo1	18.356/46.553/32.154	1064.2/10339	32.154	5701.8	7.4263	198.85	388.35	287.7	1	0	0	0	TRUE
Morn2_71879	Morn2	702.78/514.11/623.12	17964/63766	623.12	40865	6.0329	9115.1	19565	287.7	1	0	0	0	TRUE
Mcee_39720	Mcee	0/3.0361/1.1088	0/1287.6	1.1088	643.81	8.2563	2.4719	5.0105	287.12	1	0	0	0	TRUE
Tmem97_33866	Tmem97	98.337/22.264/8.8701	5102.9/3834.1	22.264	4468.5	7.5858	2983.2	239.88	287.07	1	0	0	0	TRUE
Abhd11_33383	Abhd11	57.691/25.3/35.48	2224.6/9907.1	35.48	6065.8	7.3777	298.47	441.92	286.86	1	0	0	0	TRUE
Akirin1_32215	Akirin1	43.924/34.409/221.75	6359.7/7600.9	43.924	6980.3	7.2799	15857	585.03	286.78	1	0	0	0	TRUE
Scnn1g_15345	Scnn1g	1.9667/2.024/0	1054/797.56	1.9667	925.8	8.2872	1.9357	10.379	286.75	1	0	0	0	TRUE
Astn2_24126	Astn2	27.534/15.18/13.305	679.04/6255.6	15.18	3467.3	7.7438	78.069	145.41	286.28	1	0	0	0	TRUE
Xrcc6_5973	Xrcc6	0/2.024/51.003	35.472/1845	2.024	940.22	8.2819	1201.5	10.767	285.92	1	0	0	0	TRUE
Lrrc9_44060	Lrrc9	197.33/166.98/143.03	5503.3/28203	166.98	16853	6.6486	747.31	3408.6	285.8	1	0	0	0	TRUE
Olfr139_67228	Olfr139	25.568/13.156/2.2175	770.25/5525.3	13.156	3147.8	7.7972	136.85	120.66	285.37	1	0	0	0	TRUE
Serpinb1a_27800	Serpinb1a	7.2114/18.216/56.547	2868.2/4919.9	18.216	3894	7.6632	795.17	184.51	285.34	1	0	0	0	TRUE
Dap_55887	Dap	26.879/151.8/59.873	86.147/16951	59.873	8518.4	7.1288	4769.8	879.53	285.21	1	0	0	0	TRUE
Abcb1a_12924	Abcb1a	30.812/13.156/17.74	3450.9/4199.2	17.74	3825.1	7.6736	95.945	178.23	285.19	1	0	0	0	TRUE
Jazf1_59127	Jazf1	0.65558/4.0481/12.196	101.35/2825.1	4.0481	1463.2	8.1802	38.952	26.189	285.13	1	0	0	0	TRUE
Nrm_48337	Nrm	66.869/171.03/29.937	6222.8/12088	66.869	9155.6	7.0759	6106.9	1017.4	284.94	1	0	0	0	TRUE
Fam24a_32542	Fam24a	64.902/23.276/51.003	6957.6/8350.4	51.003	7654	7.2017	480.98	712.12	284.91	1	0	0	0	TRUE
Fads1_42565	Fads1	30.157/11.132/23.284	2356.4/6774.5	23.284	4565.4	7.5549	97.45	254.37	284.79	1	0	0	0	TRUE
Dzank1_62219	Dzank1	65.558/43.517/55.438	3339.5/12828	55.438	8083.8	7.1624	122.26	794.74	284.78	1	0	0	0	TRUE
Slc45a2_18588	Slc45a2	36.712/40.481/41.024	4616.5/8513.7	40.481	6565.1	7.3064	7.2479	525.5	284.62	1	0	0	0	TRUE
Atp10a_1318	Atp10a	23.601/26.312/22.175	167.23/9032.6	23.601	4599.9	7.5471	4.6927	258.91	284.41	1	0	0	0	TRUE
Thnsl1_52628	Thnsl1	19.012/38.457/28.828	4586.1/5890.4	28.828	5238.2	7.4566	94.535	336.52	283.98	1	0	0	0	TRUE
Lilra6_13024	Lilra6	6.5558/29.349/32.154	648.64/9945.5	29.349	5297.1	7.4477	263.69	344.51	283.81	1	0	0	0	TRUE
Olfr1496_67173	Olfr1496	0/0/4.4351	0/912.87	0.65558	456.44	8.1101	9.8348	2.5846	283.51	1	0	0	0	TRUE
Plcxd1_73487	Plcxd1	98.337/90.07/139.7	3349.6/20150	98.337	11750	6.8862	889.8	1692.4	283.23	1	0	0	0	TRUE
Gcc1_40656	Gcc1	529.71/106.26/114.2	11726/14202	114.2	12964	6.8143	86354	2062.2	282.97	1	0	0	0	TRUE
Boll_41583	Boll	5020.4/3887.2/4524.9	53234/2.5242e+05	4524.9	152830	5.0776	326120	274730	282.94	1	0	0	0	TRUE
Olfr195_67208	Olfr195	85.881/39.469/45.459	5776.9/8311.9	45.459	7044.4	7.2446	834.89	612.07	282.9	1	0	0	0	TRUE
Spi1_15615	Spi1	28.845/66.793/137.49	4586.1/13549	66.793	9067.5	7.0636	3218.8	1015.9	282.39	1	0	0	0	TRUE
Tbx5_17166	Tbx5	15.078/37.445/56.547	577.69/11790	37.445	6184.1	7.3299	432.57	474.33	282.23	1	0	0	0	TRUE
1700123K08Rik_42999	1700123K08Rik	72.114/147.75/126.4	2376.6/25272	126.4	13824	6.7618	1701.5	2358.2	282.08	1	0	0	0	TRUE
Hsd3b7_47136	Hsd3b7	5.9002/6.0721/9.9789	481.41/3276.7	6.0721	1879.1	8.0544	7.6461	44.202	281.72	1	0	0	0	TRUE
Dennd3_48179	Dennd3	265.51/144.72/361.46	15258/29990	265.51	22624	6.4076	11898	6301.7	281.65	1	0	0	0	TRUE
Crygn_54012	Crygn	0/11.132/3.3263	0/2546.4	3.3263	1273.2	8.2023	35.998	20.343	281.55	1	0	0	0	TRUE
Tmprss11g_70079	Tmprss11g	0/31.373/13.305	0/6255.6	13.305	3127.8	7.7729	251.73	122.44	281.46	1	0	0	0	TRUE
5430419D17Rik_36784	5430419D17Rik	45.235/42.505/19.958	6820.8/6582.3	42.505	6701.5	7.2674	257.91	560.31	281.32	1	0	0	0	TRUE
Vegfc_18704	Vegfc	382.2/154.84/175.18	1424/32825	175.18	17124	6.6029	21635	3632	281.24	1	0	0	0	TRUE
Klf7_45642	Klf7	34.09/43.517/27.719	2189.1/9388.2	34.09	5788.7	7.3663	64.727	419.32	281.02	1	0	0	0	TRUE
Drp2_4464	Drp2	28.19/16.192/16.631	3177.3/4045.5	16.631	3611.4	7.6787	66.895	163.82	280.86	1	0	0	0	TRUE
Dguok_20992	Dguok	184.22/153.83/137.49	11650/19689	153.83	15670	6.6613	595.3	3057.8	280.59	1	0	0	0	TRUE
Mrpl27_46019	Mrpl27	0/0/0	0/903.26	0.65558	451.63	8.0949	0	2.5846	280.52	1	0	0	0	TRUE
Chrnd_148	Chrnd	0/20.24/1.1088	633.43/624.6	1.1088	629.01	8.2228	183.62	5.0105	280.51	1	0	0	0	TRUE
Ankrd13c_74112	Ankrd13c	70.803/90.07/209.56	8346.1/13607	90.07	10976	6.9133	7324.1	1507.1	280.42	1	0	0	0	TRUE
Atp8a2_21997	Atp8a2	61.624/34.409/17.74	1596.3/10022	34.409	5809.3	7.3584	509.27	424.48	280.3	1	0	0	0	TRUE
Rab30_42341	Rab30	0.65558/9.1082/31.045	673.97/4189.6	9.1082	2431.8	7.9109	276.34	74.771	280.17	1	0	0	0	TRUE
Kcnk13_55397	Kcnk13	0/5.0601/25.502	5.0675/3315.2	5.0601	1660.1	8.0986	221.73	34.922	280.07	1	0	0	0	TRUE
Il17re_25968	Il17re	31.468/41.493/58.764	15.202/13117	41.493	6565.9	7.2718	199.41	542.83	280.03	1	0	0	0	TRUE
Rragd_22450	Rragd	7.8669/10.12/8.8701	0/4775.8	8.8701	2387.9	7.9191	1.2845	72.243	279.9	1	0	0	0	TRUE
Olfr92_65283	Olfr92	577.56/461.48/526.66	22545/48526	526.66	35536	6.0736	3419.9	15645	279.89	1	0	0	0	TRUE
Rhox8_74390	Rhox8	50.48/68.817/58.764	2224.6/14289	58.764	8256.7	7.1103	84.849	858.13	279.85	1	0	0	0	TRUE
Olfr875_66332	Olfr875	5.9002/20.24/38.807	2361.4/5823.2	20.24	4092.3	7.5903	275.17	211.76	279.83	1	0	0	0	TRUE
Tpsb2_10504	Tpsb2	19.667/100.19/52.112	592.89/14654	52.112	7623.4	7.1655	1682.1	732.57	279.74	1	0	0	0	TRUE
Agap1_71676	Agap1	0/4.0481/6.6526	420.6/2450.3	4.0481	1435.5	8.1526	11.585	26.189	279.71	1	0	0	0	TRUE
1700016D06Rik_42698	1700016D06Rik	45.235/72.865/121.96	1378.3/17642	72.865	9510.4	7.0086	1587.1	1139.4	279.59	1	0	0	0	TRUE
Ppapdc1a_72686	Ppapdc1a	13.767/24.288/22.175	3035.4/5631	22.175	4333.2	7.547	37.581	238.63	279.07	1	0	0	0	TRUE
Slc38a1_48138	Slc38a1	94.403/22.264/110.88	7621.5/14885	94.403	11253	6.8822	2737.7	1603.5	278.66	1	0	0	0	TRUE
Olfr353_67014	Olfr353	57.691/30.361/45.459	1069.2/12809	45.459	6939.1	7.2229	188.79	612.07	278.64	1	0	0	0	TRUE
BC068281_61150	BC068281	100.3/54.649/46.568	314.18/15355	54.649	7834.8	7.1376	1074.8	779.88	278.6	1	0	0	0	TRUE
Pqlc3_55262	Pqlc3	54.413/43.517/83.157	4332.7/11272	54.413	7802.1	7.1377	472.48	775.45	278.23	1	0	0	0	TRUE
Ppid_31432	Ppid	55.724/28.337/26.61	10.135/10138	28.337	5073.9	7.4345	376.53	329.02	278.16	1	0	0	0	TRUE
Hemk1_34554	Hemk1	9.1781/7.0841/1.1088	197.63/3901.3	7.0841	2049.5	7.9867	20.045	53.966	278.02	1	0	0	0	TRUE
Tmem104_70135	Tmem104	66.869/20.24/43.242	9197.4/4189.6	43.242	6693.5	7.2414	543.66	573.11	277.79	1	0	0	0	TRUE
Gm44_53605	Gm44	9.8337/3.0361/16.631	349.65/4718.1	9.8337	2533.9	7.8702	46.209	82.602	277.72	1	0	0	0	TRUE
Taco1_35469	Taco1	1.9667/30.361/41.024	40.54/10560	30.361	5300.5	7.4013	459.96	360.18	277.69	1	0	0	0	TRUE
B3galt6_50633	B3galt6	38.679/64.769/53.221	2143.5/13193	53.221	7668.5	7.1441	172.41	753.15	277.49	1	0	0	0	TRUE
Vmn1r237_51441	Vmn1r237	43.268/63.757/134.16	4246.5/13030	63.757	8638.3	7.0597	2688.2	955.46	277.4	1	0	0	0	TRUE
A430089I19Rik_71344	A430089I19Rik	12.456/3.0361/2.2175	1798.9/566.94	3.0361	1182.9	8.1964	44.703	18.092	277.4	1	0	0	0	TRUE
Mpzl2_5209	Mpzl2	18.356/15.18/4.4351	146.96/6572.7	15.18	3359.8	7.6984	62.773	145.41	277.36	1	0	0	0	TRUE
Hrasls5_29047	Hrasls5	20.979/3.0361/14.414	1074.3/5419.6	14.414	3246.9	7.7191	86.275	135.91	277.28	1	0	0	0	TRUE
Wdsub1_38065	Wdsub1	19.667/9.1082/9.9789	405.4/4698.9	9.9789	2552.1	7.8614	47.313	84.191	277.06	1	0	0	0	TRUE
Dlgap2_63075	Dlgap2	72.769/42.505/60.982	4363.1/12386	60.982	8374.7	7.0782	240.17	901.05	276.96	1	0	0	0	TRUE
Rnf139_42255	Rnf139	58.347/14.168/21.066	3881.7/4429.8	21.066	4155.8	7.5575	718.69	223.14	276.79	1	0	0	0	TRUE
Klhdc4_60273	Klhdc4	477.92/718.53/457.92	13307/52562	477.92	32935	6.1037	29148	13751	276.78	1	0	0	0	TRUE
Pacsin3_44775	Pacsin3	5.9002/10.12/6.6526	304.05/3613	6.6526	1958.5	8.0004	6.2952	49.746	276.74	1	0	0	0	TRUE
Capn7_2028	Capn7	0/19.228/12.196	481.41/5323.5	12.196	2902.4	7.7815	99.1	109.32	276.44	1	0	0	0	TRUE
Copz1_24819	Copz1	42.613/34.409/44.351	2680.7/10503	42.613	6591.8	7.24	35.163	562.17	276.22	1	0	0	0	TRUE
Pea15a_12803	Pea15a	0/7.0841/2.2175	0/1921.8	2.2175	960.92	8.2238	14.301	12.099	275.62	1	0	0	0	TRUE
Prdm6_56631	Prdm6	19.012/2.024/17.74	1297.3/6092.2	17.74	3694.7	7.6236	124.31	178.23	275.42	1	0	0	0	TRUE
Vmn2r19_59269	Vmn2r19	19.012/50.601/67.635	1586.1/13126	50.601	7356.1	7.1556	644.01	704.74	275.19	1	0	0	0	TRUE
Prkcd_13083	Prkcd	53.757/59.709/52.112	6577.6/8725.1	53.757	7651.3	7.1267	19.065	763.17	275.02	1	0	0	0	TRUE
Defb13_63627	Defb13	82.603/40.481/102.01	1510.1/18815	82.603	10162	6.9256	1075.4	1344.4	274.91	1	0	0	0	TRUE
Ccdc66_69968	Ccdc66	125.87/110.31/245.04	2989.8/23869	125.87	13429	6.726	7221.3	2345.2	274.71	1	0	0	0	TRUE
Crhbp_3427	Crhbp	23.601/18.216/34.372	111.48/8773.2	23.601	4442.3	7.4968	72.502	258.91	274.61	1	0	0	0	TRUE
Cstad_44273	Cstad	1.3112/3.0361/8.8701	314.18/2027.5	3.0361	1170.9	8.1816	18.506	18.092	274.56	1	0	0	0	TRUE
Ticam1_48385	Ticam1	20.323/24.288/43.242	5.0675/9042.2	24.288	4523.6	7.4832	187.48	268.83	274.42	1	0	0	0	TRUE
Scn10a_15304	Scn10a	15.078/37.445/43.242	4733/7293.4	37.445	6013.2	7.2894	266.93	474.33	274.38	1	0	0	0	TRUE
Glipr1l1_34212	Glipr1l1	79.325/1.012/2.2175	55.742/1854.6	2.2175	955.16	8.2152	2973.5	12.099	273.97	1	0	0	0	TRUE
Zfp667_73160	Zfp667	7.8669/32.385/46.568	1038.8/9868.6	32.385	5453.7	7.3522	401.14	392	273.82	1	0	0	0	TRUE
Tceb3_20876	Tceb3	79.325/19.228/16.631	1945.9/5794.3	19.228	3870.1	7.5802	1809.2	198.02	273.66	1	0	0	0	TRUE
Klk1b4_11617	Klk1b4	152.75/58.697/23.284	13550/2584.9	58.697	8067.6	7.0785	5050	856.84	273.61	1	0	0	0	TRUE
G6pdx_5990	G6pdx	0/4.0481/2.2175	5.0675/1902.6	2.2175	953.84	8.2132	4.1342	12.099	273.59	1	0	0	0	TRUE
Vamp1_18639	Vamp1	77.358/15.18/21.066	395.26/7812.3	21.066	4103.8	7.5393	1601.7	223.14	273.31	1	0	0	0	TRUE
Dcun1d3_59851	Dcun1d3	19.012/33.397/36.589	673.97/10436	33.397	5554.8	7.3356	108.56	408.16	273.29	1	0	0	0	TRUE
Olfr285_64104	Olfr285	26.879/27.325/16.631	4738.1/4891.1	26.879	4814.6	7.4324	52.603	307	273.25	1	0	0	0	TRUE
Gid4_29131	Gid4	0/13.156/2.2175	0/1902.6	2.2175	951.31	8.2093	62.287	12.099	272.86	1	0	0	0	TRUE
Sypl_13522	Sypl	0/2.024/6.6526	35.472/1758.5	2.024	896.98	8.2141	12.76	10.767	272.74	1	0	0	0	TRUE
Nbl1_11378	Nbl1	4.5891/2.024/17.74	1363.1/1672	4.5891	1517.6	8.0859	89.766	30.785	272.69	1	0	0	0	TRUE
Cyp2u1_36878	Cyp2u1	33.435/32.385/32.154	2219.5/8638.6	32.385	5429.1	7.3457	0.57772	392	272.57	1	0	0	0	TRUE
Surf4_16928	Surf4	18.356/17.204/6.6526	3177.3/3987.8	17.204	3582.6	7.621	56.333	171.23	272.47	1	0	0	0	TRUE
Rbm39_51206	Rbm39	37.368/36.433/19.958	2341.2/9388.2	36.433	5864.7	7.2919	136.15	457.56	272.47	1	0	0	0	TRUE
Uchl4_45853	Uchl4	22.945/23.276/27.719	1221.3/7514.4	23.276	4367.8	7.4915	9.9233	254.26	272.46	1	0	0	0	TRUE
Ccdc14_61635	Ccdc14	95.715/4.0481/14.414	2984.7/3392	14.414	3188.4	7.6929	3358.6	135.91	272.26	1	0	0	0	TRUE
Cyp2d26_42571	Cyp2d26	30.812/4.0481/16.631	1586.1/5410	16.631	3498	7.6327	179.72	163.82	272	1	0	0	0	TRUE
Dqx1_45847	Dqx1	13.112/166.98/22.175	1768.5/6678.4	22.175	4223.5	7.51	10526	238.63	271.97	1	0	0	0	TRUE
Vmn1r212_51597	Vmn1r212	13.112/22.264/19.958	3699.2/4180	19.958	3939.6	7.5548	26.095	207.9	271.85	1	0	0	0	TRUE
Vmn2r108_75974	Vmn2r108	41.957/36.433/15.523	2929/8773.2	36.433	5851.1	7.2885	233.87	457.56	271.83	1	0	0	0	TRUE
Fgd5_59230	Fgd5	99.648/67.805/136.38	2346.2/20410	99.648	11378	6.8209	1181.5	1722.2	271.77	1	0	0	0	TRUE
Lancl3_60691	Lancl3	47.857/28.337/21.066	2837.8/7072.3	28.337	4955.1	7.4004	216.96	329.02	271.61	1	0	0	0	TRUE
Bmp5_1634	Bmp5	0/5.0601/16.631	0/3219.1	5.0601	1609.5	8.054	79.75	34.922	271.51	1	0	0	0	TRUE
Slamf7_41570	Slamf7	14.423/27.325/7.7613	1469.6/4891.1	14.423	3180.3	7.6884	105.42	136.02	271.45	1	0	0	0	TRUE
Eftud1_47165	Eftud1	17.701/21.252/14.414	501.68/6764.9	17.701	3633.3	7.6024	11.709	177.71	271.22	1	0	0	0	TRUE
Ptgr2_43530	Ptgr2	211.1/127.51/139.7	2057.4/26358	139.7	14208	6.658	2622.7	2692	271.14	1	0	0	0	TRUE
Fam172a_33238	Fam172a	264.85/111.32/185.16	9891.7/24378	185.16	17135	6.5243	5901.6	3908.5	271.12	1	0	0	0	TRUE
Cdk20_48012	Cdk20	92.437/31.373/48.786	2224.6/11915	48.786	7070	7.15	1104.3	671.66	270.92	1	0	0	0	TRUE
Il27ra_22223	Il27ra	6.5558/8.0962/13.305	141.89/4208.8	8.0962	2175.4	7.9024	14.753	64.169	270.55	1	0	0	0	TRUE
Olfr339_67044	Olfr339	2.6223/2.024/0	116.55/1662.4	2.024	889.47	8.2019	2.2273	10.767	270.46	1	0	0	0	TRUE
Hist1h4j_69215	Hist1h4j	43.268/2.024/0	20.27/1758.5	2.024	889.37	8.2018	852.59	10.767	270.43	1	0	0	0	TRUE
D130040H23Rik_53151	D130040H23Rik	6.5558/39.469/23.284	1145.2/7524	23.284	4334.6	7.4801	270.89	254.37	270.32	1	0	0	0	TRUE
Nsl1_72318	Nsl1	13.112/4.0481/9.9789	243.24/4737.3	9.9789	2490.3	7.826	22.494	84.191	270.32	1	0	0	0	TRUE
A430005L14Rik_46307	A430005L14Rik	36.712/1.012/2.2175	491.54/1393.3	2.2175	942.44	8.1958	595.68	12.099	270.31	1	0	0	0	TRUE
Spatc1l_42897	Spatc1l	3.2779/11.132/12.196	380.06/4967.9	11.132	2674	7.7846	31.411	97.064	270.28	1	0	0	0	TRUE
Atoh7_22932	Atoh7	74.08/109.3/39.915	2934.1/15653	74.08	9293.7	6.9518	1203.8	1164.5	270.17	1	0	0	0	TRUE
Slc18a3_15955	Slc18a3	51.791/30.361/54.329	1778.7/12876	51.791	7327.5	7.1171	232.85	726.63	269.91	1	0	0	0	TRUE
Rph3a_14870	Rph3a	343.52/249.97/426.87	8918.7/42607	343.52	25763	6.2246	7849.9	8869.4	269.91	1	0	0	0	TRUE
Rtca_28178	Rtca	215.03/21.252/14.414	1211.1/6928.2	21.252	4069.7	7.5152	18798	225.72	269.47	1	0	0	0	TRUE
control_79285	control	87.848/151.8/177.4	7307.3/22505	151.8	14906	6.6082	2372.8	3004.6	269.16	1	0	0	0	TRUE
Pick1_12954	Pick1	88.503/56.673/58.764	2391.8/13491	58.764	7941.6	7.0542	444.38	858.13	269.09	1	0	0	0	TRUE
Prss45_67745	Prss45	95.059/138.65/171.86	5619.8/22437	138.65	14029	6.6506	1501.4	2665	269.06	1	0	0	0	TRUE
Col2a1_3183	Col2a1	57.691/136.62/87.592	2467.9/18200	87.592	10334	6.8661	1649	1452.6	268.84	1	0	0	0	TRUE
Neurod2_11504	Neurod2	39.99/37.445/26.61	5994.8/5784.7	37.445	5889.8	7.2595	61.932	474.33	268.71	1	0	0	0	TRUE
Olfr61_12255	Olfr61	0/8.0962/0	0/864.83	0.65558	432.41	8.0323	32.774	2.5846	268.56	1	0	0	0	TRUE
Dcstamp_42164	Dcstamp	5.9002/151.8/18.849	608.1/6889.8	18.849	3748.9	7.5617	8922.2	192.93	268.55	1	0	0	0	TRUE
Kcnt1_57393	Kcnt1	36.712/70.841/31.045	1342.9/10272	36.712	5807.5	7.267	598.45	462.18	268.43	1	0	0	0	TRUE
Gys2_59343	Gys2	25.568/53.637/23.284	638.5/8513.7	25.568	4576.1	7.4286	396.55	287.53	268.36	1	0	0	0	TRUE
Zfp354a_17211	Zfp354a	1.3112/26.312/8.8701	1089.5/3488.1	8.8701	2288.8	7.858	180.69	72.243	268.24	1	0	0	0	TRUE
Ncoa6_24705	Ncoa6	9.8337/54.649/23.284	4033.7/4564.4	23.284	4299	7.4682	582.34	254.37	268.09	1	0	0	0	TRUE
Cntnap5a_76273	Cntnap5a	2.6223/9.1082/7.7613	1560.8/2632.9	7.7613	2096.8	7.9035	14.112	60.747	268.04	1	0	0	0	TRUE
Tmsb4x_14040	Tmsb4x	30.812/12.144/97.571	694.24/9638	30.812	5166.1	7.3436	2402.6	367.22	267.98	1	0	0	0	TRUE
AW146154_47223	AW146154	0.65558/6.0721/39.915	0/3574.6	6.0721	1787.3	7.9822	587.36	44.202	267.92	1	0	0	0	TRUE
Mcl1_10451	Mcl1	12.456/6.0721/2.2175	547.29/3026.9	6.0721	1787.1	7.9821	27.806	44.202	267.88	1	0	0	0	TRUE
Magee1_48626	Magee1	74.08/102.21/79.831	3096.2/16268	79.831	9682.3	6.9044	267.03	1285.2	267.85	1	0	0	0	TRUE
Pigh_49860	Pigh	17.701/53.637/9.9789	1216.2/5957.7	17.701	3586.9	7.5839	675.52	177.71	267.74	1	0	0	0	TRUE
Vmn2r7_69354	Vmn2r7	137.02/96.142/63.199	21045/845.61	96.142	10945	6.8161	1377.9	1642.7	267.69	1	0	0	0	TRUE
Pitpna_13035	Pitpna	4.5891/107.27/2.2175	0/2978.8	4.5891	1489.4	8.0589	5274.9	30.785	267.61	1	0	0	0	TRUE
Necab3_25433	Necab3	35.401/51.613/107.55	1312.5/13184	51.613	7248.1	7.1062	1695.9	723.35	267.58	1	0	0	0	TRUE
Pfn1_12880	Pfn1	8.5225/7.0841/0	1484.8/2459.9	7.0841	1972.4	7.9313	26.127	53.966	267.52	1	0	0	0	TRUE
Gng12_6659	Gng12	56.38/53.637/39.915	2680.7/12184	53.637	7432.6	7.088	97.902	760.92	267.5	1	0	0	0	TRUE
C9_1838	C9	26.879/29.349/24.393	10.135/9407.4	26.879	4708.8	7.4003	6.14	307	267.21	1	0	0	0	TRUE
control_78810	control	0/12.144/22.175	461.14/5131.3	12.144	2796.2	7.7334	124.05	108.71	267.03	1	0	0	0	TRUE
Gprc5d_45793	Gprc5d	0/0/12.196	820.93/38.437	0.65558	429.68	8.0231	74.376	2.5846	266.86	1	0	0	0	TRUE
Rab11fip4_67899	Rab11fip4	256.99/183.18/146.36	7530.2/25926	183.18	16728	6.5051	3401.9	3853	266.54	1	0	0	0	TRUE
Snx3_23374	Snx3	159.31/73.877/66.526	3288.8/14990	73.877	9139.5	6.9316	3676	1160.3	266.14	1	0	0	0	TRUE
Adrbk2_69880	Adrbk2	1.3112/6.0721/22.175	5.0675/3545.8	6.0721	1775.4	7.9726	140.99	44.202	266.13	1	0	0	0	TRUE
Vps4a_50469	Vps4a	15.078/19.228/47.677	3684/3843.7	19.228	3763.9	7.5401	413.27	198.02	266.11	1	0	0	0	TRUE
Smad4_10211	Smad4	0.65558/19.228/8.8701	1753.3/2786.7	8.8701	2270	7.846	87.386	72.243	266.03	1	0	0	0	TRUE
Fam177a_39411	Fam177a	25.568/15.18/26.61	760.12/8311.9	25.568	4536	7.4159	54.492	287.53	266	1	0	0	0	TRUE
Mixl1_20847	Mixl1	17.701/25.3/27.719	1292.2/7716.2	25.3	4504.2	7.4204	31.804	283.6	265.96	1	0	0	0	TRUE
Ccdc71_38498	Ccdc71	139.64/23.276/51.003	8827.5/5467.6	51.003	7147.6	7.1029	4312.5	712.12	265.93	1	0	0	0	TRUE
Slco4a1_48978	Slco4a1	97.681/30.361/24.393	2255/7898.7	30.361	5076.9	7.3391	2283.8	360.18	265.91	1	0	0	0	TRUE
Tmem25_37048	Tmem25	33.435/6.0721/26.61	167.23/9138.3	26.61	4652.8	7.397	234.19	302.99	265.77	1	0	0	0	TRUE
Olfr96_65486	Olfr96	285.83/266.16/104.22	9197.4/33594	266.16	21396	6.3235	13305	6322.2	265.74	1	0	0	0	TRUE
Olfr1426_66551	Olfr1426	7.8669/5.0601/4.4351	420.6/2729	5.0601	1574.8	8.0225	4.1345	34.922	265.63	1	0	0	0	TRUE
Zfp786_71116	Zfp786	29.501/15.18/7.7613	2092.9/4343.3	15.18	3218.1	7.6363	130.06	145.41	265.61	1	0	0	0	TRUE
Ctc1_33703	Ctc1	0/2.024/0	0/855.22	0.65558	427.61	8.0162	2.0484	2.5846	265.57	1	0	0	0	TRUE
Olfr1006_65684	Olfr1006	71.458/22.264/45.459	3663.8/9561.1	45.459	6612.4	7.1533	606.97	612.07	265.44	1	0	0	0	TRUE
Pirb_13027	Pirb	27.534/5.0601/4.4351	5.0675/3142.2	5.0601	1573.6	8.0215	252.74	34.922	265.43	1	0	0	0	TRUE
Calr4_49152	Calr4	7.2114/27.325/19.958	1099.6/6591.9	19.958	3845.8	7.52	108.37	207.9	265.34	1	0	0	0	TRUE
Dnaic1_33627	Dnaic1	17.701/35.421/21.066	3653.6/4314.5	21.066	3984.1	7.4966	108.69	223.14	265.3	1	0	0	0	TRUE
Trnp1_34563	Trnp1	11.8/20.24/82.048	228.04/7533.6	20.24	3880.8	7.5138	1945.7	211.76	265.3	1	0	0	0	TRUE
Mab21l3_62316	Mab21l3	19.012/23.276/239.49	3096.2/5410	23.276	4253.1	7.4532	23384	254.26	265.27	1	0	0	0	TRUE
Gm14137_75670	Gm14137	7.2114/46.553/29.937	684.11/9349.7	29.937	5016.9	7.3416	396.27	353.59	265.21	1	0	0	0	TRUE
Srd5a3_25716	Srd5a3	110.14/44.529/88.701	5959.3/14596	88.701	10278	6.8403	1205.3	1476.9	265.13	1	0	0	0	TRUE
Ppm1l_62294	Ppm1l	70.803/97.154/149.68	2853/18978	97.154	10916	6.7973	1726.9	1665.5	265.09	1	0	0	0	TRUE
Fbxl6_21668	Fbxl6	42.613/21.252/41.024	4104.6/8225.4	41.024	6165	7.197	196.72	534.79	264.82	1	0	0	0	TRUE
Hist1h2af_69269	Hist1h2af	19.667/23.276/26.61	1287.1/7197.3	23.276	4242.2	7.4495	12.07	254.26	264.58	1	0	0	0	TRUE
Ift80_32598	Ift80	121.28/61.733/43.242	6101.2/10032	61.733	8066.6	7.0068	1944	915.7	264.53	1	0	0	0	TRUE
Crmp1_3457	Crmp1	4.5891/13.156/26.61	1109.8/4727.7	13.156	2918.7	7.6883	127.2	120.66	264.52	1	0	0	0	TRUE
Gria2_6918	Gria2	112.1/185.2/188.49	9425.5/24013	185.2	16719	6.4886	2676.9	3909.5	264.44	1	0	0	0	TRUE
Ppp1r9a_62818	Ppp1r9a	15.734/15.18/15.523	162.16/6332.4	15.523	3247.3	7.6191	0.080922	149.71	264.13	1	0	0	0	TRUE
Pitpnm2_14569	Pitpnm2	164.55/135.61/62.091	3167.2/23975	135.61	13571	6.6344	3121.3	2588.1	264.09	1	0	0	0	TRUE
Nes_11490	Nes	32.779/89.058/82.048	5797.2/13635	82.048	9716.3	6.8705	1238.3	1332.5	263.93	1	0	0	0	TRUE
Piwil1_25849	Piwil1	213.72/106.26/63.199	4307.3/18757	106.26	11532	6.7485	6700.7	1874.8	263.88	1	0	0	0	TRUE
Cnbp_3076	Cnbp	340.25/375.46/521.12	7069.1/46345	375.46	26707	6.1486	11228	9980.4	263.57	1	0	0	0	TRUE
Ola1_29857	Ola1	0/1.012/3.3263	0/1114.7	1.012	557.33	8.1163	3.19	4.4643	263.3	1	0	0	0	TRUE
Eif5a2_52547	Eif5a2	73.425/257.05/268.32	9982.9/31422	257.05	20702	6.3261	16923	6036.9	263.14	1	0	0	0	TRUE
Pde1a_12694	Pde1a	37.368/65.781/24.393	1195.9/10320	37.368	5758.1	7.2298	487.83	473.05	263.02	1	0	0	0	TRUE
Mef2d_10569	Mef2d	0/9.1082/4.4351	0/2863.5	4.4351	1431.8	8.0423	20.754	29.459	262.98	1	0	0	0	TRUE
Ttc7_56508	Ttc7	0/11.132/6.6526	157.09/3565	6.6526	1861	7.9267	32.162	49.746	262.92	1	0	0	0	TRUE
Zfp870_61717	Zfp870	52.446/13.156/8.8701	390.19/5410	13.156	2900.1	7.679	781.04	120.66	262.82	1	0	0	0	TRUE
Slc38a7_60160	Slc38a7	25.568/88.046/8.8701	25.337/8936.5	25.568	4480.9	7.3983	2091.2	287.53	262.75	1	0	0	0	TRUE
Rsph3b_77127	Rsph3b	32.779/23.276/8.8701	775.32/7648.9	23.276	4212.1	7.4392	148.92	254.26	262.7	1	0	0	0	TRUE
Csnk1e_21010	Csnk1e	78.014/26.312/39.915	3729.7/8273.5	39.915	6001.6	7.1968	818.27	515.87	262.48	1	0	0	0	TRUE
Mroh4_34422	Mroh4	154.06/40.481/22.175	6081/6024.9	40.481	6053	7.1893	6617.8	525.5	262.28	1	0	0	0	TRUE
Zfp300_63362	Zfp300	15.734/23.276/33.263	709.44/7696.9	23.276	4203.2	7.4361	78.31	254.26	262.14	1	0	0	0	TRUE
Scgb1b19_74339	Scgb1b19	166.52/101.2/133.05	10388/16201	133.05	13295	6.632	1067.2	2523.7	261.99	1	0	0	0	TRUE
Bank1_62336	Bank1	25.568/39.469/74.287	2133.4/9753.3	39.469	5943.4	7.1986	702.78	508.3	261.87	1	0	0	0	TRUE
Olfr1196_65309	Olfr1196	0/9.1082/51.003	0/4545.1	9.1082	2272.6	7.8133	919.07	74.771	261.76	1	0	0	0	TRUE
Gm12695_75489	Gm12695	3.2779/18.216/2.2175	10.135/2335	3.2779	1172.6	8.0998	112.14	19.963	261.7	1	0	0	0	TRUE
Celf3_44403	Celf3	47.202/43.517/42.133	2047.3/10618	43.517	6332.7	7.1526	7.7466	577.91	261.62	1	0	0	0	TRUE
Htr1a_8111	Htr1a	28.845/56.673/66.526	1940.8/13136	56.673	7538.3	7.0304	435.73	818.14	261.57	1	0	0	0	TRUE
Ikzf4_19338	Ikzf4	95.715/78.937/41.024	765.19/18008	78.937	9386.4	6.8757	859.44	1266.2	261.56	1	0	0	0	TRUE
Ankrd13d_32836	Ankrd13d	14.423/17.204/41.024	2949.3/3930.1	17.204	3439.7	7.5623	287.56	171.23	261.55	1	0	0	0	TRUE
Prodh_13748	Prodh	15.078/5.0601/0	1322.6/1777.7	5.0601	1550.2	7.9998	62.985	34.922	261.46	1	0	0	0	TRUE
Tmem233_75020	Tmem233	136.36/231.75/120.86	4494.8/22447	136.36	13471	6.6158	4670	2607.1	261.16	1	0	0	0	TRUE
Meig1_47803	Meig1	19.012/25.3/23.284	846.27/7524	23.284	4185.1	7.4295	11.159	254.37	260.95	1	0	0	0	TRUE
Cd300lb_55158	Cd300lb	11.145/0/2.2175	1819.2/0	2.2175	909.61	8.1447	42.307	12.099	260.87	1	0	0	0	TRUE
2310022B05Rik_34604	2310022B05Rik	24.912/58.697/64.308	5011.7/10378	58.697	7694.8	7.0103	586.46	856.84	260.87	1	0	0	0	TRUE
Slc25a30_31023	Slc25a30	76.047/32.385/7.7613	4586.1/5803.9	32.385	5195	7.2821	1256.4	392	260.75	1	0	0	0	TRUE
Ndn_11428	Ndn	149.47/94.118/114.2	6562.4/17345	114.2	11953	6.6972	823.67	2062.2	260.71	1	0	0	0	TRUE
Zfy1_19290	Zfy1	57.035/54.649/26.61	5812.4/8840.4	54.649	7326.4	7.0408	395.93	779.88	260.39	1	0	0	0	TRUE
Dhrs13_35801	Dhrs13	0.65558/10.12/12.196	815.86/4026.2	10.12	2421.1	7.7669	46.945	85.745	260.36	1	0	0	0	TRUE
Spam1_16433	Spam1	32.779/41.493/44.351	3278.6/8936.5	41.493	6107.6	7.1675	42.049	542.83	260.36	1	0	0	0	TRUE
Gpatch1_30850	Gpatch1	0/47.565/9.9789	0/4795	9.9789	2397.5	7.7713	756.14	84.191	260.2	1	0	0	0	TRUE
Esco1_43844	Esco1	117.35/107.27/52.112	3324.3/19564	107.27	11444	6.7239	1572.2	1898.5	260.19	1	0	0	0	TRUE
Nup62cl_69075	Nup62cl	30.157/29.349/72.07	456.07/9436.2	30.157	4946.1	7.3109	878.67	357	260.18	1	0	0	0	TRUE
Psg28_50424	Psg28	81.292/57.685/78.722	1175.7/17450	78.722	9313	6.8683	224.58	1261.7	259.97	1	0	0	0	TRUE
Rbm45_62141	Rbm45	78.669/57.685/171.86	6172.2/12444	78.669	9308	6.8685	4562.2	1260.6	259.95	1	0	0	0	TRUE
Ank_721	Ank	94.403/76.913/100.9	4662.1/16336	94.403	10499	6.7821	174.03	1603.5	259.82	1	0	0	0	TRUE
Arhgef37_70774	Arhgef37	411.7/303.61/316	7109.6/39820	316	23465	6.21	4656.6	7938.8	259.81	1	0	0	0	TRUE
Nanos2_71863	Nanos2	41.957/11.132/14.414	445.94/5640.6	14.414	3043.3	7.6257	384.7	135.91	259.81	1	0	0	0	TRUE
Nynrin_68897	Nynrin	36.712/15.18/21.066	1565.8/6236.4	21.066	3901.1	7.4662	139.72	223.14	259.75	1	0	0	0	TRUE
Hpcal1_23001	Hpcal1	20.979/55.661/51.003	1646.9/12309	51.003	6978.1	7.0683	461.59	712.12	259.58	1	0	0	0	TRUE
Rasl12_36149	Rasl12	0/3.0361/0	258.44/576.55	0.65558	417.5	7.9817	4.6088	2.5846	259.28	1	0	0	0	TRUE
Fsd1_61749	Fsd1	1.9667/3.0361/39.915	0/2210.1	3.0361	1105.1	8.0983	680.62	18.092	259.09	1	0	0	0	TRUE
Anp32b_31182	Anp32b	60.313/15.18/17.74	1641.9/5304.3	17.74	3473.1	7.5343	909.51	178.23	258.82	1	0	0	0	TRUE
Plcd3_38518	Plcd3	270.1/120.43/191.82	3820.9/29673	191.82	16747	6.4406	5612	4095.6	258.69	1	0	0	0	TRUE
Ttc23l_42189	Ttc23l	30.812/33.397/49.894	1601.3/8907.7	33.397	5254.5	7.2554	139.43	408.16	258.43	1	0	0	0	TRUE
Batf2_40857	Batf2	6.5558/8.0962/13.305	5.0675/4151.2	8.0962	2078.1	7.8365	14.753	64.169	258.41	1	0	0	0	TRUE
Dcaf4_39803	Dcaf4	20.979/11.132/35.48	1956/5784.7	20.979	3870.4	7.4606	153.63	221.92	258.4	1	0	0	0	TRUE
Zdhhc18_74723	Zdhhc18	213.72/52.625/154.12	15020/13885	154.12	14453	6.5419	6926.5	3065.4	258.25	1	0	0	0	TRUE
Slc16a6_47873	Slc16a6	126.53/229.73/104.22	3278.6/22063	126.53	12671	6.6347	5574	2361.3	258.14	1	0	0	0	TRUE
Ccdc68_72215	Ccdc68	6.5558/5.0601/17.74	1109.8/2508	6.5558	1808.9	7.9041	63.664	48.811	257.97	1	0	0	0	TRUE
Arntl2_68787	Arntl2	59.002/20.24/22.175	1986.4/6024.9	22.175	4005.7	7.4337	679.98	238.63	257.87	1	0	0	0	TRUE
Fam111a_48566	Fam111a	19.012/9.1082/44.351	1130/6111.4	19.012	3620.7	7.4997	370.07	195.11	257.85	1	0	0	0	TRUE
Gfap_6338	Gfap	4.5891/158.89/4.4351	410.46/2459.9	4.5891	1435.2	8.0054	11904	30.785	257.84	1	0	0	0	TRUE
Smcr8_61034	Smcr8	87.848/126.5/56.547	5913.7/13953	87.848	9933.1	6.8049	1237	1458.2	257.82	1	0	0	0	TRUE
Siah1a_15754	Siah1a	299.6/285.39/268.32	2498.3/41002	285.39	21750	6.247	246.64	6935.1	257.75	1	0	0	0	TRUE
Slc9a1_16091	Slc9a1	62.936/43.517/32.154	6577.6/5890.4	43.517	6234	7.1299	253.1	577.91	257.51	1	0	0	0	TRUE
Appl1_39053	Appl1	14.423/44.529/72.07	146.96/12502	44.529	6324.2	7.1182	832.44	595.65	257.3	1	0	0	0	TRUE
St3gal4_15775	St3gal4	294.35/266.16/291.6	2655.3/41367	291.6	22011	6.2332	327.47	7136.1	257.11	1	0	0	0	TRUE
Zfp472_56340	Zfp472	0/13.156/3.3263	0/2325.4	3.3263	1162.7	8.0714	53.846	20.343	257.05	1	0	0	0	TRUE
Sycp1_16964	Sycp1	16.389/16.192/35.48	187.5/6361.3	16.389	3274.4	7.5573	182.25	160.71	256.99	1	0	0	0	TRUE
L1td1_72521	L1td1	0/1.012/0	0/826.39	0.65558	413.19	7.9668	0.51209	2.5846	256.61	1	0	0	0	TRUE
Eif3j1_44305	Eif3j1	0/0/15.523	0/826.39	0.65558	413.19	7.9668	120.48	2.5846	256.61	1	0	0	0	TRUE
Rag2_14405	Rag2	0/11.132/0	0/826.39	0.65558	413.19	7.9668	61.963	2.5846	256.61	1	0	0	0	TRUE
Sars2_37749	Sars2	20.323/28.337/54.329	2244.9/7120.4	28.337	4682.6	7.3188	369.92	329.02	256.59	1	0	0	0	TRUE
Nr5a1_20256	Nr5a1	195.36/117.39/56.547	3390.1/20554	117.39	11972	6.6601	4890.7	2138.7	256.34	1	0	0	0	TRUE
Skint10_58401	Skint10	213.06/255.03/319.32	1804/38312	255.03	20058	6.2918	2947.5	5974	256.21	1	0	0	0	TRUE
Cyp2j12_62456	Cyp2j12	21.634/39.469/72.07	146.96/11483	39.469	5815	7.1671	690.44	508.3	256.17	1	0	0	0	TRUE
Tpsg1_20649	Tpsg1	55.069/24.288/9.9789	3207.7/5237	24.288	4222.3	7.3838	576.09	268.83	256.04	1	0	0	0	TRUE
Phf19_39949	Phf19	359.91/82.986/98.68	6673.8/14625	98.68	10650	6.7394	34244	1700.2	255.88	1	0	0	0	TRUE
Defa-rs7_4154	Defa-rs7	0.65558/9.1082/12.196	511.81/3930.1	9.1082	2221	7.7802	40.492	74.771	255.8	1	0	0	0	TRUE
Ppp1r7_28224	Ppp1r7	7.2114/0/0	410.46/413.19	0.65558	411.83	7.9621	26.002	2.5846	255.76	1	0	0	0	TRUE
Dnajb8_25169	Dnajb8	6.5558/22.264/13.305	1322.6/4362.6	13.305	2842.6	7.635	62.911	122.44	255.69	1	0	0	0	TRUE
Gm2933_77442	Gm2933	28.19/7.0841/32.154	3917.1/5381.1	28.19	4649.1	7.3157	230.58	326.78	255.62	1	0	0	0	TRUE
Litaf_25253	Litaf	97.026/144.72/88.701	5108/15932	97.026	10520	6.7459	1172	1662.6	255.62	1	0	0	0	TRUE
Fsd1l_69572	Fsd1l	10.489/7.0841/8.8701	0/4362.6	8.8701	2181.3	7.7886	2.9057	72.243	255.59	1	0	0	0	TRUE
Klhl3_78374	Klhl3	131.12/170.02/148.57	2630/25282	148.57	13956	6.544	382.34	2920.4	255.5	1	0	0	0	TRUE
Tescl_34237	Tescl	338.93/151.8/204.01	12481/21986	204.01	17233	6.3934	10465	4444.1	255.45	1	0	0	0	TRUE
Dpf1_21518	Dpf1	9.8337/4.0481/22.175	2087.8/2575.3	9.8337	2331.5	7.7502	92.894	82.602	255.45	1	0	0	0	TRUE
Cyp3a16_3919	Cyp3a16	10.489/19.228/13.305	1844.6/3834.1	13.305	2839.3	7.6334	21.507	122.44	255.39	1	0	0	0	TRUE
Col28a1_53898	Col28a1	6.5558/24.288/1.1088	5.0675/3574.6	6.5558	1789.8	7.8888	172.06	48.811	255.25	1	0	0	0	TRUE
Prkcdbp_49296	Prkcdbp	27.534/30.361/67.635	60.81/9686	30.361	4873.4	7.2801	698.67	360.18	255.19	1	0	0	0	TRUE
Kptn_35716	Kptn	5.2446/42.505/13.305	1454.4/4218.4	13.305	2836.4	7.6319	458.8	122.44	255.13	1	0	0	0	TRUE
control_79628	control	34.746/62.745/37.698	451/10781	37.698	5616.2	7.1815	318.04	478.55	255.01	1	0	0	0	TRUE
Rnf139_42256	Rnf139	47.857/10.12/18.849	334.45/6784.1	18.849	3559.3	7.4868	458.84	192.93	254.89	1	0	0	0	TRUE
Zbtb26_70209	Zbtb26	2.6223/34.409/39.915	1758.4/8802	34.409	5280.2	7.2206	520.35	424.48	254.62	1	0	0	0	TRUE
Wfdc21_27464	Wfdc21	169.79/71.853/29.937	4692.5/12482	71.853	8587.4	6.8812	5674.8	1118.6	254.62	1	0	0	0	TRUE
Ces1c_5134	Ces1c	108.17/361.29/235.06	9587.6/28136	235.06	18862	6.3202	16018	5361.8	254.38	1	0	0	0	TRUE
Ppp1cc_13560	Ppp1cc	1.3112/0/2.2175	0/1268.4	1.3112	634.21	8.1025	1.2703	6.1963	254.25	1	0	0	0	TRUE
Chrna4_127	Chrna4	526.43/787.35/406.92	9273.5/55358	526.43	32316	5.9372	41182	15636	254.22	1	0	0	0	TRUE
Slc5a8_54636	Slc5a8	41.957/28.337/22.175	2234.8/7043.5	28.337	4639.1	7.3053	111.74	329.02	254.2	1	0	0	0	TRUE
Tinag_20645	Tinag	0.65558/8.0962/6.6526	222.97/3372.8	6.6526	1797.9	7.8769	19.024	49.746	253.96	1	0	0	0	TRUE
Crb3_56465	Crb3	0/1.012/0	192.56/624.6	0.65558	408.58	7.9507	0.51209	2.5846	253.74	1	0	0	0	TRUE
Hap1_7351	Hap1	0/5.0601/19.958	0/3007.7	5.0601	1503.8	7.956	123.77	34.922	253.62	1	0	0	0	TRUE
Srms_16680	Srms	149.47/278.31/100.9	4383.4/23437	149.47	13910	6.5306	9478.7	2943.7	253.62	1	0	0	0	TRUE
Slc35e3_54360	Slc35e3	0/5.0601/0	0/816.78	0.65558	408.39	7.95	12.802	2.5846	253.62	1	0	0	0	TRUE
Cyb5d1_70537	Cyb5d1	0/3.0361/9.9789	0/2162.1	3.0361	1081	8.0666	28.71	18.092	253.44	1	0	0	0	TRUE
Slc35e2_70143	Slc35e2	15.734/7.0841/7.7613	60.81/3901.3	7.7613	1981.1	7.8216	32.01	60.747	253.18	1	0	0	0	TRUE
Adam21_25118	Adam21	51.135/64.769/55.438	755.05/13626	55.438	7190.4	6.9935	52.792	794.74	253.09	1	0	0	0	TRUE
Prr13_27589	Prr13	80.636/91.082/23.284	5057.3/13366	80.636	9211.8	6.8183	1699.2	1302.3	253.03	1	0	0	0	TRUE
Serpina3n_16492	Serpina3n	36.712/28.337/21.066	3810.7/5419.6	28.337	4615.2	7.2978	61.504	329.02	252.87	1	0	0	0	TRUE
Ptgis_14001	Ptgis	38.679/18.216/25.502	405.4/8206.2	25.502	4305.8	7.3444	113.36	286.56	252.85	1	0	0	0	TRUE
Ddx4_4133	Ddx4	11.145/14.168/29.937	800.66/5054.4	14.168	2927.5	7.593	128.89	132.9	252.72	1	0	0	0	TRUE
Adamtsl4_58061	Adamtsl4	17.701/17.204/21.066	1013.5/5755.9	17.701	3384.7	7.5002	5.7877	177.71	252.57	1	0	0	0	TRUE
Parp9_44710	Parp9	32.123/21.252/34.372	3222.9/6784.1	32.123	5003.5	7.2392	61.616	387.86	252.43	1	0	0	0	TRUE
Lmf2_48185	Lmf2	21.634/58.697/36.589	1591.2/9311.3	36.589	5451.2	7.1804	356.21	460.15	252.42	1	0	0	0	TRUE
control_79051	control	14.423/16.192/4.4351	861.47/5054.4	14.423	2957.9	7.5839	51.443	136.02	252.39	1	0	0	0	TRUE
Pcdhga7_45718	Pcdhga7	81.292/33.397/22.175	2817.5/7447.1	33.397	5132.3	7.2215	1209.9	408.16	252.38	1	0	0	0	TRUE
Tac1_17037	Tac1	0.65558/3.0361/12.196	293.91/1854.6	3.0361	1074.2	8.0575	44.789	18.092	251.84	1	0	0	0	TRUE
Prob1_72207	Prob1	253.05/74.889/70.961	2412.1/15048	74.889	8730	6.8461	15879	1181.3	251.82	1	0	0	0	TRUE
Ankrd61_29051	Ankrd61	36.057/22.264/18.849	1621.6/6217.1	22.264	3919.4	7.3967	100.95	239.88	251.62	1	0	0	0	TRUE
Olfr1386_63975	Olfr1386	0/10.12/52.112	0/4679.7	10.12	2339.8	7.7177	932.86	85.745	251.59	1	0	0	0	TRUE
Met_10621	Met	3.2779/9.1082/4.4351	10.135/2729	4.4351	1369.6	7.9783	11.589	29.459	251.52	1	0	0	0	TRUE
Spata45_41827	Spata45	302.22/219.61/129.73	12866/22783	219.61	17825	6.3363	7452	4899.8	251.51	1	0	0	0	TRUE
Fam151b_39902	Fam151b	0/11.132/2.2175	466.21/1287.6	2.2175	876.92	8.092	42.195	12.099	251.47	1	0	0	0	TRUE
Scg2_15280	Scg2	62.28/265.15/79.831	2133.4/16047	79.831	9090.4	6.8134	17325	1285.2	251.34	1	0	0	0	TRUE
4931406P16Rik_59641	4931406P16Rik	103.58/99.178/186.27	4976.2/16624	103.58	10800	6.6904	3428.6	1812.6	251.24	1	0	0	0	TRUE
Tram1_38236	Tram1	10.489/15.18/17.74	689.17/5400.4	15.18	3044.8	7.5564	14.279	145.41	251.24	1	0	0	0	TRUE
Gsdma2_43065	Gsdma2	24.256/15.18/6.6526	5.0675/6082.6	15.18	3043.8	7.556	77.549	145.41	251.16	1	0	0	0	TRUE
Itga1_49579	Itga1	5.2446/33.397/13.305	2787.1/2796.3	13.305	2791.7	7.609	234.32	122.44	251.09	1	0	0	0	TRUE
Ash2l_19430	Ash2l	0/4.0481/0	0/807.17	0.65558	403.59	7.933	8.1935	2.5846	250.63	1	0	0	0	TRUE
Pi16_40120	Pi16	0.65558/0/2.2175	0/807.17	0.65558	403.59	7.933	1.4347	2.5846	250.63	1	0	0	0	TRUE
Sugp1_35993	Sugp1	43.268/31.373/78.722	4084.4/8004.4	43.268	6044.4	7.0934	699.24	573.57	250.58	1	0	0	0	TRUE
Cep250_8674	Cep250	108.83/62.745/69.852	765.19/15817	69.852	8290.9	6.8708	784.74	1077.7	250.43	1	0	0	0	TRUE
Rcan1_23847	Rcan1	59.658/41.493/22.175	917.21/10830	41.493	5873.4	7.1111	351.57	542.83	250.31	1	0	0	0	TRUE
Maneal_54274	Maneal	5.9002/0/2.2175	5.0675/1739.3	2.2175	872.16	8.0842	9.2398	12.099	250.11	1	0	0	0	TRUE
Mccc1_37858	Mccc1	3.9335/13.156/48.786	5.0675/5515.7	13.156	2760.4	7.6078	677.25	120.66	250.1	1	0	0	0	TRUE
Tfeb_17267	Tfeb	35.401/28.337/47.677	4945.8/5621.4	35.401	5283.6	7.1817	100.3	440.63	250.02	1	0	0	0	TRUE
Tmpo_17771	Tmpo	12.456/15.18/31.045	1976.3/4083.9	15.18	3030.1	7.5495	129.56	145.41	250.02	1	0	0	0	TRUE
Tmem200b_75641	Tmem200b	110.79/145.73/210.66	3222.9/23735	145.73	13479	6.5215	2718.6	2846.6	249.9	1	0	0	0	TRUE
Atp5sl_28116	Atp5sl	81.292/75.901/168.53	5219.5/13059	81.292	9139.2	6.7953	3820	1316.3	249.66	1	0	0	0	TRUE
Ciz1_32798	Ciz1	0.65558/1.012/4.4351	0/1057	1.012	528.5	8.0399	5.9221	4.4643	249.65	1	0	0	0	TRUE
Hoxd8_7896	Hoxd8	1.9667/5.0601/15.523	0/2959.6	5.0601	1479.8	7.9328	59.517	34.922	249.56	1	0	0	0	TRUE
Rnf146_32151	Rnf146	7.8669/13.156/7.7613	0/3939.8	7.8669	1969.9	7.7962	13.994	61.822	249.54	1	0	0	0	TRUE
Prr7_73928	Prr7	57.035/5.0601/6.6526	1054/2479.2	6.6526	1766.6	7.8516	1270.5	49.746	249.53	1	0	0	0	TRUE
Cyb5d1_70540	Cyb5d1	0.65558/6.0721/11.088	359.79/2969.2	6.0721	1664.5	7.8796	27.247	44.202	249.45	1	0	0	0	TRUE
Akip1_25726	Akip1	15.078/3.0361/2.2175	349.65/1777.7	3.0361	1063.7	8.0433	72.843	18.092	249.36	1	0	0	0	TRUE
Defa-rs7_4155	Defa-rs7	3.9335/14.168/7.7613	1393.6/2508	7.7613	1950.8	7.7994	27.851	60.747	249.29	1	0	0	0	TRUE
Ccdc63_71069	Ccdc63	34.746/46.553/88.701	5.0675/12617	46.553	6311	7.0524	957.94	631.51	249.28	1	0	0	0	TRUE
Thoc6_73238	Thoc6	3.9335/8.0962/3.3263	263.51/2248.5	3.9335	1256	7.9932	8.8483	25.238	249.23	1	0	0	0	TRUE
Jdp2_45110	Jdp2	30.812/13.156/21.066	126.69/7360.6	21.066	3743.7	7.4068	78.775	223.14	249.21	1	0	0	0	TRUE
Ccdc89_35319	Ccdc89	31.468/3.0361/0	1489.8/634.21	3.0361	1062	8.041	408.79	18.092	248.97	1	0	0	0	TRUE
Mrfap1_31052	Mrfap1	19.012/3.0361/9.9789	1915.5/2671.3	9.9789	2293.4	7.7073	64.898	84.191	248.86	1	0	0	0	TRUE
Dstn_24772	Dstn	37.368/39.469/23.284	3106.4/7793	37.368	5449.7	7.1504	101.39	473.05	248.84	1	0	0	0	TRUE
Nms_74031	Nms	16.389/43.517/25.502	826/7648.9	25.502	4237.4	7.3213	203.79	286.56	248.82	1	0	0	0	TRUE
Tmem108_45156	Tmem108	20.323/45.541/22.175	2108.1/5621.4	22.175	3864.7	7.382	274.69	238.63	248.75	1	0	0	0	TRUE
Gstt3_47470	Gstt3	106.2/103.23/90.919	3025.3/18305	103.23	10665	6.6772	80.17	1804.4	248.65	1	0	0	0	TRUE
Slc37a1_56334	Slc37a1	22.945/36.433/22.175	344.59/7552.8	22.945	3948.7	7.3659	91.252	249.53	248.52	1	0	0	0	TRUE
Gtsf1l_32563	Gtsf1l	24.256/61.733/48.786	3937.4/9032.6	48.786	6485	7.0255	384.66	671.66	248.35	1	0	0	0	TRUE
Gm5108_71044	Gm5108	57.035/29.349/17.74	4130/5140.9	29.349	4635.4	7.2552	450.66	344.51	248.16	1	0	0	0	TRUE
Gpr107_68942	Gpr107	11.8/74.889/7.7613	86.147/5016	11.8	2551.1	7.6393	1998.3	104.72	248.14	1	0	0	0	TRUE
Sec24d_34704	Sec24d	18.356/6.0721/3.3263	927.35/2383.1	6.0721	1655.2	7.8715	79.219	44.202	248.05	1	0	0	0	TRUE
D3Ertd254e_62269	D3Ertd254e	97.026/222.64/47.677	3334.4/17085	97.026	10210	6.7027	9107.7	1662.6	248.01	1	0	0	0	TRUE
Pbrm1_29494	Pbrm1	104.89/159.9/136.38	12942/12655	136.38	12799	6.5418	772.28	2607.5	247.97	1	0	0	0	TRUE
Sh2d5_58601	Sh2d5	0.65558/0/0	10.135/787.95	0.65558	399.04	7.9167	0.21489	2.5846	247.81	1	0	0	0	TRUE
Abcb10_24249	Abcb10	0.65558/3.0361/9.9789	0/2114	3.0361	1057	8.0342	26.935	18.092	247.79	1	0	0	0	TRUE
Dtna_4528	Dtna	83.914/64.769/88.701	4231.3/14289	83.914	9260.1	6.769	194.72	1372.6	247.68	1	0	0	0	TRUE
Zc3h7a_48258	Zc3h7a	8.5225/19.228/22.175	1413.8/5592.5	19.228	3503.2	7.4366	61.65	198.02	247.58	1	0	0	0	TRUE
Nup210_23685	Nup210	34.09/14.168/18.849	1089.5/5823.2	18.849	3456.3	7.4445	127.1	192.93	247.48	1	0	0	0	TRUE
Zfp26_19145	Zfp26	20.979/22.264/45.459	532.08/7178	22.264	3855.1	7.3729	269.83	239.88	247.47	1	0	0	0	TRUE
Cpne2_60141	Cpne2	97.681/41.493/186.27	12111/8350.4	97.681	10231	6.6961	5502.7	1677.5	247.41	1	0	0	0	TRUE
B4galnt3_71151	B4galnt3	47.857/33.397/92.027	2498.3/10243	47.857	6370.8	7.027	1080.1	654.89	247.08	1	0	0	0	TRUE
Vwa5b1_42080	Vwa5b1	38.024/1.012/6.6526	10.135/3488.1	6.6526	1749.1	7.8373	507.98	49.746	247.05	1	0	0	0	TRUE
Tc2n_40728	Tc2n	62.28/59.709/64.308	1560.8/13587	62.28	7574.1	6.9034	5.3616	926.4	246.8	1	0	0	0	TRUE
A630095N17Rik_72274	A630095N17Rik	68.836/37.445/31.045	2837.8/7985.2	37.445	5411.5	7.1374	513.18	474.33	246.75	1	0	0	0	TRUE
Slc22a27_51642	Slc22a27	53.102/14.168/18.849	1728/5160.1	18.849	3444.1	7.4393	597.59	192.93	246.6	1	0	0	0	TRUE
Muc15_68245	Muc15	22.945/20.24/49.894	1657.1/6178.7	22.945	3917.9	7.3546	366.78	249.53	246.57	1	0	0	0	TRUE
Nrg2_77664	Nrg2	82.603/12.144/5.5438	476.34/4689.3	12.144	2582.8	7.6189	2504	108.71	246.56	1	0	0	0	TRUE
Zfp366_61325	Zfp366	0.65558/13.156/3.3263	395.26/1835.4	3.3263	1115.3	8.0114	51.88	20.343	246.54	1	0	0	0	TRUE
Fermt3_48964	Fermt3	133.74/68.817/238.38	5270.2/19853	133.74	12561	6.5428	7582.7	2540.9	246.54	1	0	0	0	TRUE
Prss45_67746	Prss45	15.078/0/0	111.48/682.25	0.65558	396.87	7.9088	113.68	2.5846	246.45	1	0	0	0	TRUE
Olfr893_64847	Olfr893	43.268/78.937/83.157	6597.8/11099	78.937	8848.2	6.7905	645.05	1266.2	246.44	1	0	0	0	TRUE
Akap7_73840	Akap7	38.024/20.24/11.088	2027/5179.3	20.24	3603.2	7.4067	200.01	211.76	246.22	1	0	0	0	TRUE
Abhd13_33595	Abhd13	7.8669/3.0361/1.1088	831.06/1268.4	3.0361	1049.7	8.0242	13.526	18.092	246.08	1	0	0	0	TRUE
control_78855	control	24.912/21.252/24.393	932.41/7206.9	24.393	4069.6	7.3247	5.0658	270.35	246.03	1	0	0	0	TRUE
Eml6_60998	Eml6	29.501/62.745/62.091	2472.9/12598	62.091	7535.3	6.9003	531.26	922.69	246.02	1	0	0	0	TRUE
Prrt4_47103	Prrt4	53.102/127.51/52.112	1444.2/12136	53.102	6790.3	6.9719	2769.1	750.94	245.85	1	0	0	0	TRUE
Itgax_8815	Itgax	0/4.0481/6.6526	957.75/1566.3	4.0481	1262	7.9669	11.585	26.189	245.82	1	0	0	0	TRUE
Svs2_23139	Svs2	34.09/11.132/3.3263	3065.8/1796.9	11.132	2431.4	7.6474	294	97.064	245.66	1	0	0	0	TRUE
Capn3_2010	Capn3	5.2446/4.0481/1.1088	2032.1/490.07	4.0481	1261.1	7.9658	5.0357	26.189	245.63	1	0	0	0	TRUE
Vmn1r5_51335	Vmn1r5	32.779/32.385/94.245	1479.7/8388.8	32.779	4934.3	7.1909	1889.1	398.28	245.6	1	0	0	0	TRUE
Mrpl46_30471	Mrpl46	0/6.0721/6.6526	96.282/3180.6	6.0721	1638.5	7.8569	18.604	44.202	245.53	1	0	0	0	TRUE
Traf2_18026	Traf2	3.2779/2.024/3.3263	1844.6/355.54	3.2779	1100	8.0078	0.78725	19.963	245.47	1	0	0	0	TRUE
Gm14393_76470	Gm14393	32.779/40.481/42.133	3952.6/7379.8	40.481	5666.2	7.0941	31.024	525.5	245.41	1	0	0	0	TRUE
Stab1_51774	Stab1	3.9335/1.012/8.8701	263.51/2210.1	3.9335	1236.8	7.971	16.453	25.238	245.41	1	0	0	0	TRUE
S100a2_76007	S100a2	57.691/73.877/77.613	1859.8/15000	73.877	8429.8	6.815	137.98	1160.3	245.31	1	0	0	0	TRUE
1700029J07Rik_34480	1700029J07Rik	26.223/27.325/35.48	755.05/7985.2	27.325	4370.1	7.2698	33.866	313.7	245.2	1	0	0	0	TRUE
Zar1l_75035	Zar1l	56.38/42.505/53.221	1692.5/11867	53.221	6779.9	6.9665	62.405	753.15	245.11	1	0	0	0	TRUE
Gck_47662	Gck	1.3112/9.1082/11.088	3228/1028.2	9.1082	2128.1	7.7186	32.356	74.771	245.05	1	0	0	0	TRUE
Tceal7_77476	Tceal7	72.114/49.589/80.94	5513.4/11060	72.114	8286.8	6.8247	292.63	1123.9	245.03	1	0	0	0	TRUE
Gas2l1_44573	Gas2l1	70.147/0/5.5438	891.87/2190.9	5.5438	1541.4	7.8808	2102.1	39.293	245.01	1	0	0	0	TRUE
Slc41a3_37065	Slc41a3	1.3112/24.288/9.9789	902.01/3613	9.9789	2257.5	7.6845	139.95	84.191	244.95	1	0	0	0	TRUE
Cfap53_40804	Cfap53	0/0/0	278.71/509.29	0.65558	394	7.8984	0	2.5846	244.67	1	0	0	0	TRUE
Amigo3_70379	Amigo3	151.44/202.4/176.29	6942.4/23024	176.29	14983	6.4011	649.75	3662.5	244.66	1	0	0	0	TRUE
Rab11a_23125	Rab11a	105.55/113.35/78.722	4434/16854	105.55	10644	6.6426	390.22	1858.2	244.48	1	0	0	0	TRUE
Sgk2_20857	Sgk2	0.65558/14.168/7.7613	309.12/3517	7.7613	1913	7.7713	45.77	60.747	244.45	1	0	0	0	TRUE
Krt24_42063	Krt24	119.32/108.29/104.22	3967.8/17681	108.29	10824	6.6302	69.074	1922.2	244.42	1	0	0	0	TRUE
Prkra_19788	Prkra	0/11.132/11.088	172.29/4650.8	11.088	2411.6	7.6409	61.469	96.558	244.29	1	0	0	0	TRUE
Olfr211_66906	Olfr211	72.769/99.178/53.221	7271.8/9349.7	72.769	8310.8	6.816	539.78	1137.4	244.27	1	0	0	0	TRUE
Gm815_70789	Gm815	1.9667/29.349/13.305	10.135/5419.6	13.305	2714.9	7.5687	192.98	122.44	244.15	1	0	0	0	TRUE
Ppdpf_28519	Ppdpf	15.078/13.156/70.961	121.62/5765.5	15.078	2943.6	7.5168	1563.3	144.14	243.92	1	0	0	0	TRUE
1810013L24Rik_33839	1810013L24Rik	11.145/4.0481/70.961	1439.2/3392	11.145	2415.6	7.6365	1814.2	97.207	243.88	1	0	0	0	TRUE
Pcbp4_26556	Pcbp4	27.534/9.1082/7.7613	1814.2/2421.5	9.1082	2117.8	7.7116	170.67	74.771	243.87	1	0	0	0	TRUE
[truncated: 77,634 more rows]
